# Supplementary material for: High-fat diet enhances starvation-induced hyperactivity via sensitizing hunger-sensing neurons in Drosophila
Source: eLife. 2020 Apr 23;9:e53103. doi: 10.7554/eLife.53103 (PMC7274782; doi:10.7554/eLife.53103)
Supplement: Figure 5—source data 1. — Wild-type virgin female flies were fed with ND or HFD for 5 d before their head tissues harvested and subjected to RNAseq. Top 40 differentially expressed genes (20 up-regulated and 20 down-regulated) were shown. [file elife-53103-fig5-data1.xlsx]

## Sheet: Sheet1
Figure 5 – source data 1
Gene	Mean(HFD)	Mean(ND)	FoldChange
CG7294	1.3991	0.1841	7.5984
CG7910	1.988	0.2844	6.9898
snRNA:U5:63BC	1.5713	0.2649	5.9324
CG2650	1.8615	0.3645	5.1074
CG15282	59.0112	13.2078	4.4679
CG11843	2.6143	0.6382	4.0964
CG9759	38.3594	9.9453	3.857
Listericin	326.663	88.7385	3.6812
CG9029	1.5127	0.4379	3.4547
CG1441	62.0552	20.8489	2.9764
CG42305	331.134	113.387	2.9204
Obp56h	87.6834	33.9593	2.582
TwdlT	4.9389	1.9952	2.4754
Obp56d	1090.03	443.317	2.4588
CG14419	167.76	69.7858	2.4039
to	190.101	79.6827	2.3857
CG12428	25.9458	11.467	2.2627
CG2837	5.1094	2.2817	2.2393
CG32694	96.7568	43.5755	2.2204
Odc2	3.0378	1.377	2.2061
CG32640	0.0005	22.2552	0
CG40282	0.0005	1.7244	0.0003
snoRNA:Me28S-A982a	0.0005	1.1774	0.0004
snoRNA:Psi28S-3316a	0.0556	1.4261	0.039
CG13169	0.12	1.3404	0.0895
CG2444	0.1644	1.0597	0.1551
CR32658	0.3418	2.1815	0.1567
CG14589	0.3728	1.1379	0.3276
snoRNA:Me28S-A2634c	2.1933	6.291	0.3486
Jhe	0.4579	1.1316	0.4046
CG16926	19.5827	48.0172	0.4078
CG33057	2.0857	4.9229	0.4237
CG16734	0.6453	1.4916	0.4326
CG10516	18.8216	41.6938	0.4514
CG5697	1.157	2.4364	0.4749
snoRNA:Psi28S-1153	1.2776	2.6815	0.4765
CG2004	38.7562	75.4008	0.514
Obp19b	4.8387	9.3427	0.5179
RabX5	3.0314	5.8214	0.5207
shtd	2.5735	4.918	0.5233
