# Supplementary material for: High-fat diet enhances starvation-induced hyperactivity via sensitizing hunger-sensing neurons in Drosophila
Source: eLife. 2020 Apr 23;9:e53103. doi: 10.7554/eLife.53103 (PMC7274782; doi:10.7554/eLife.53103)
Supplement: Figure 7—source data 2. — Wild-type virgin female flies were fed with ND or HFD for 5 d before their hemolymph harvested and subjected to LC-MS/MS. Top 40 differentially expressed peptides (20 up-regulated and 20 down-regulated) were shown. [file elife-53103-fig7-data2.xlsx]

## Sheet: Sheet1
Figure 7 – source data 2
Protein	Mean(HFD)	Mean(ND)	FoldChange
Spt5	2246267	14483.5	155.09
fs(1)N	606550	6754.1	89.8
fon	2152300	28661	75.1
yellow-f	1204840	33431.5	36.04
Zasp67	2373967	67897.7	34.96
Fkbp14	442890	26349	16.81
CG11835	597690	39310	15.2
wupA	3896733	266110	14.64
up	9704700	682020	14.23
EbpIII	9465933	700143	13.52
ps	313257	25229	12.42
CG30069	80875	6844.47	11.82
Pect	1285830	114704	11.21
cl	1859900	182010	10.22
RpL35	18551000	1865233	9.95
PGRP-SB1	10918233	1150600	9.49
CTPsyn	391933	41764.5	9.38
B52	8089367	869540	9.3
Tm1	1698567	183915	9.24
levy	5521933	598895	9.22
CG11583	59047.3	6064000	0.01
CG3800	44102	3060267	0.01
Bap55	18786.3	1110087	0.02
CG15784	16769	233557	0.07
COX2	245860	1931500	0.13
CG8417	150147	1161633	0.13
yip7	512070	3887367	0.13
CG11334	34703.5	255253	0.14
CG8774	22960.7	159130	0.14
GM130	43539.3	298607	0.15
slgA	16584.5	105704	0.16
Elp1	11282.7	71393.7	0.16
JhI-26	55973	336607	0.17
Taldo	223103	1329970	0.17
Galphao	41287.3	242873	0.17
l(2)k09913	42732	225593	0.19
spheroide	173284	892760	0.19
GstE6	135883	699237	0.19
DhpD	130434	670470	0.19
CG33301	78626	382673	0.21
