# Supplementary material for: High-fat diet enhances starvation-induced hyperactivity via sensitizing hunger-sensing neurons in Drosophila
Source: eLife journal article supplement (doi:10.7554/elife.53103), 2020-04-23
Supplement: supp [file elife-53103-supp-v1.zip]

Archive with 24 entries (24 files):
- elife_poa_e53103_Figure_1_figure_supplement_1.pdf
- elife_poa_e53103_Figure_1_figure_supplement_2.pdf
- elife_poa_e53103_Figure_1_figure_supplement_3.pdf
- elife_poa_e53103_Figure_1_figure_supplement_4.pdf
- elife_poa_e53103_Figure_1_figure_supplement_5.pdf
- elife_poa_e53103_Figure_2_figure_supplement_1.pdf
- elife_poa_e53103_Figure_4_figure_supplement_1.pdf
- elife_poa_e53103_Figure_4_figure_supplement_2.pdf
- elife_poa_e53103_Figure_4_figure_supplement_3.pdf
- elife_poa_e53103_Figure_4_figure_supplement_4.pdf
- elife_poa_e53103_Figure_5_figure_supplement_1.pdf
- elife_poa_e53103_Figure_5_figure_supplement_2.pdf
- elife_poa_e53103_Figure_5_figure_supplement_3.pdf
- elife_poa_e53103_Figure_6_figure_supplement_1.pdf
- elife_poa_e53103_Figure_6_figure_supplement_2.pdf
- elife_poa_e53103_Figure_6_figure_supplement_3.pdf
- elife_poa_e53103_Figure_7_figure_supplement_1.pdf
- elife_poa_e53103_Figure_7_figure_supplement_2.pdf
- elife_poa_e53103_Figure_1_source_data_1.xlsx
- elife_poa_e53103_Figure_4_source_data_1.xlsx
- elife_poa_e53103_Figure_6_source_data_1.xlsx
- elife_poa_e53103_Figure_7_source_data_1.xlsx
- elife_poa_e53103_Figure_8_source_data_1.xlsx
- elife_poa_e53103_Transparent_Reporting_File.pdf
