# Supplementary material for: High-fat diet enhances starvation-induced hyperactivity via sensitizing hunger-sensing neurons in Drosophila
Source: eLife journal article supplement (doi:10.7554/elife.53103), 2020-04-23
Supplement: supp [file elife-53103-supp-v1.zip › elife_poa_e53103_Figure_1_source_data_1.xlsx]

## Sheet: Fig 1 A (OR Normal)
FED	M17-6.15												M18-6.10																M8-8.13																M47-6.5
20:30:00	36	38	64	36	26	53	27	19	18	70	11	67	30	31	13	62	43	46	18	74	27	28	46	19	42	41	42	46	12	38	57	85	27	48	40	46	58	61	68	43	11	54	36	11	71	46	61	31	24
21:00:00	23	25	5	11	15	20	13	6	13	50	0	26	0	4	0	11	18	0	26	46	44	4	13	0	22	8	13	28	2	26	35	13	8	4	7	10	11	21	56	31	0	0	13	0	14	14	0	0	2
21:30:00	1	8	3	1	6	0	4	4	0	34	0	9	0	0	0	14	17	0	8	12	0	7	3	7	5	0	0	18	0	2	3	0	3	0	1	0	1	6	13	2	4	0	0	1	0	0	0	0	3
22:00:00	0	20	0	0	0	0	7	5	9	8	0	1	0	0	0	17	0	0	15	0	0	0	0	5	0	0	0	9	0	2	1	0	5	0	10	0	0	19	41	0	4	0	0	0	0	0	1	0	1
22:30:00	0	0	0	0	4	0	0	7	7	0	0	2	0	0	0	0	4	0	11	0	0	0	0	2	0	0	0	7	0	0	0	0	0	0	9	1	0	5	0	0	0	0	0	0	0	0	0	0	3
23:00:00	0	0	0	2	0	0	1	0	4	0	3	8	0	0	2	0	0	0	0	0	0	0	0	0	0	0	0	0	0	0	0	0	0	0	4	1	12	2	1	0	3	0	0	1	0	0	3	0	0
23:30:00	0	0	0	0	0	1	0	0	7	20	0	0	0	0	0	0	0	0	0	0	0	0	0	4	0	0	0	0	0	0	0	1	0	0	2	0	27	0	0	0	4	0	0	0	0	0	2	0	1
00:00:00	0	0	0	0	0	15	0	0	14	17	0	0	0	0	0	0	0	0	0	0	0	0	0	25	1	0	0	0	0	0	0	0	0	0	0	0	2	1	0	0	0	1	0	0	0	0	0	0	0
00:30:00	0	0	0	0	8	3	0	0	1	0	0	0	0	0	7	0	0	0	0	0	0	0	0	30	0	0	0	0	0	0	3	0	0	0	5	0	0	0	0	0	0	0	0	2	0	0	0	0	1
01:00:00	0	0	0	0	0	2	0	11	3	0	8	0	0	0	1	0	0	0	0	0	0	0	6	2	0	0	0	0	1	0	0	0	0	0	5	0	1	0	0	0	0	0	0	0	0	0	0	0	2
01:30:00	0	0	0	0	0	9	0	7	0	1	23	0	0	0	14	0	0	0	0	0	0	0	11	0	3	0	0	0	0	0	1	0	0	0	25	0	0	0	0	0	0	0	0	0	0	0	1	0	1
02:00:00	0	0	0	0	0	50	0	2	0	5	26	0	0	0	2	0	0	0	0	0	0	0	3	5	0	0	0	0	0	1	0	0	0	1	0	0	1	0	0	0	0	0	24	0	0	0	1	0	4
02:30:00	0	0	0	0	0	9	0	0	0	2	0	0	4	0	0	0	0	0	0	0	0	0	1	0	0	0	0	0	0	0	0	0	0	1	1	0	2	1	0	0	3	1	1	2	0	0	0	0	11
03:00:00	0	0	0	0	10	0	0	0	0	0	0	0	6	0	0	0	0	0	0	0	0	0	0	14	0	0	0	0	2	0	0	0	8	0	3	0	1	1	0	1	21	0	2	0	0	0	0	0	2
03:30:00	0	0	0	0	0	3	0	0	0	0	17	0	0	0	8	0	0	0	0	0	0	0	13	0	0	0	0	0	0	0	0	0	6	0	27	0	14	0	0	0	5	0	25	0	0	0	0	0	0
04:00:00	0	0	0	0	0	0	0	0	8	0	0	0	0	0	0	1	0	0	0	0	0	0	0	1	0	0	0	0	1	0	0	1	0	3	0	0	0	4	0	0	0	0	31	2	0	0	0	0	0
04:30:00	0	0	0	0	0	0	0	0	4	0	0	0	0	0	1	0	0	0	0	0	0	0	0	3	0	0	0	0	0	0	0	63	0	1	14	0	0	0	0	2	2	0	9	1	0	0	0	0	2
05:00:00	6	1	0	0	0	0	0	0	32	0	0	0	11	0	0	0	0	0	0	0	0	0	0	0	0	0	0	0	0	3	0	8	2	0	1	0	0	0	0	0	0	0	3	1	0	0	0	0	2
05:30:00	1	0	0	0	0	0	0	0	0	0	0	0	1	18	0	0	0	0	0	0	0	0	0	0	0	0	0	0	0	0	1	25	1	0	2	0	2	0	1	0	49	0	4	0	0	0	0	0	5
06:00:00	0	0	36	0	0	0	13	0	0	0	0	3	0	46	0	0	0	0	0	0	0	0	0	6	0	0	0	0	0	0	8	29	2	0	6	1	0	0	0	1	11	0	10	0	0	0	0	0	1
06:30:00	0	0	41	0	0	0	15	9	0	0	0	0	6	1	0	7	0	0	0	0	0	0	0	0	0	0	0	0	2	0	35	0	0	1	1	18	2	0	0	3	0	1	0	0	0	0	0	0	1
07:00:00	0	0	0	0	0	0	0	0	0	0	0	6	23	0	0	7	0	0	0	0	0	0	46	0	0	0	0	0	0	0	3	0	0	2	0	10	2	0	0	2	3	0	0	1	37	0	0	0	9
07:30:00	0	10	24	0	0	0	2	0	0	0	0	2	18	0	0	17	0	0	0	0	0	0	34	0	0	0	0	5	0	0	51	1	5	1	6	41	1	0	1	0	0	108	0	0	0	0	0	0	19
08:00:00	0	0	0	0	13	0	0	0	0	0	7	21	18	12	0	1	0	0	39	0	0	0	0	0	0	0	0	48	3	16	11	0	2	0	7	80	0	1	0	0	1	7	6	0	5	2	0	0	0
08:30:00	38	39	22	27	35	43	33	35	19	66	38	37	71	23	7	31	41	36	18	30	27	9	32	0	20	48	5	23	53	53	48	26	45	11	37	171	44	23	49	34	26	39	29	50	22	13	35	51	55
09:00:00	25	27	27	33	29	44	37	42	21	50	42	26	4	23	22	19	20	38	9	34	21	33	21	0	26	45	0	22	26	33	45	17	23	17	40	23	16	40	58	9	47	1	18	17	0	5	30	34	12
09:30:00	20	17	25	23	22	14	24	26	18	41	31	21	12	59	4	18	0	9	0	25	30	16	8	0	38	7	0	37	31	20	21	14	11	33	36	7	13	25	25	10	29	0	13	6	2	3	13	19	20
10:00:00	9	19	19	19	17	41	16	20	14	38	8	22	8	18	46	8	13	1	10	14	21	8	33	0	40	24	0	19	14	0	23	18	6	21	46	4	13	21	31	2	0	0	15	11	7	3	0	10	20
10:30:00	20	17	22	16	11	2	12	25	15	46	22	15	8	13	3	6	63	23	0	13	7	1	9	0	18	28	0	21	14	18	22	7	21	3	29	8	23	13	15	1	0	0	1	0	6	3	0	20	12
11:00:00	15	19	19	21	22	31	24	13	11	27	9	28	4	28	16	0	0	3	25	23	0	10	7	0	11	9	0	11	1	10	11	9	9	1	16	3	4	4	23	0	4	0	0	2	21	43	30	24	1
11:30:00	2	18	20	13	9	1	18	15	12	36	4	16	3	12	31	6	15	17	0	10	3	6	6	0	74	13	0	4	22	18	7	1	13	2	1	0	0	5	25	4	3	2	0	10	17	0	0	15	10
12:00:00	26	14	10	16	4	27	6	9	14	14	9	10	6	13	4	0	7	21	7	9	0	0	4	0	8	16	0	64	0	13	12	7	1	7	0	0	20	11	11	23	16	0	0	9	16	0	2	0	4
12:30:00	8	14	11	13	17	20	12	23	7	10	10	8	3	20	2	0	7	0	0	2	0	2	14	0	10	2	0	0	6	8	0	0	3	2	0	0	8	0	10	1	0	0	1	4	7	11	41	13	7
13:00:00	1	8	4	18	10	2	8	7	12	24	12	11	3	10	1	13	0	7	0	9	5	6	13	0	9	7	79	0	1	3	1	7	0	2	7	1	2	7	0	5	0	0	1	0	2	10	0	0	3
13:30:00	0	11	13	14	11	0	15	19	10	0	11	7	3	7	0	10	3	0	0	0	12	3	1	0	11	9	82	0	2	0	0	10	9	0	4	12	13	3	0	28	12	0	0	3	2	12	0	0	0
14:00:00	0	10	10	8	3	2	1	6	9	25	0	0	0	16	0	2	18	3	0	4	0	0	0	0	5	0	0	0	16	9	0	0	6	24	1	104	5	2	0	5	1	2	0	0	0	0	0	0	0
14:30:00	0	0	4	5	0	7	20	24	6	7	2	8	14	8	0	0	2	0	2	1	0	0	7	0	9	0	9	8	0	0	3	1	0	1	0	31	7	0	1	6	0	0	2	14	0	12	0	0	0
15:00:00	0	0	10	9	0	0	8	4	6	0	0	0	0	8	0	0	24	0	65	0	0	0	12	0	7	0	4	0	5	2	4	9	12	3	1	10	1	0	0	6	0	1	3	0	0	3	0	0	22
15:30:00	0	0	0	13	0	24	1	44	4	0	15	0	1	0	0	0	21	0	0	0	0	2	0	0	5	0	0	0	0	1	8	0	29	0	0	0	0	0	0	2	16	0	19	11	0	1	0	0	0
16:00:00	0	0	0	11	0	0	11	0	1	0	0	2	4	0	0	16	8	1	0	2	0	10	20	0	11	0	0	0	0	18	23	0	43	0	0	33	0	0	1	8	4	0	11	0	0	30	26	0	16
16:30:00	0	0	24	0	0	0	0	27	3	1	14	1	10	24	0	7	3	19	1	2	1	31	0	0	4	0	0	0	0	2	41	1	4	51	0	90	9	0	0	3	0	0	1	0	0	0	0	0	0
17:00:00	0	0	0	0	0	0	0	7	0	0	9	0	2	9	0	0	10	0	44	4	0	11	8	0	4	0	0	0	0	6	6	1	28	28	0	27	5	1	0	3	5	1	9	1	0	2	0	1	0
17:30:00	0	0	0	0	1	1	0	2	3	0	4	0	6	14	1	0	0	57	14	3	0	18	4	0	6	4	0	0	0	1	12	0	9	0	0	8	0	0	0	1	0	0	7	0	2	0	0	0	24
18:00:00	0	1	0	18	16	0	0	10	4	0	14	0	0	14	4	17	0	7	0	1	0	15	10	0	20	2	1	0	0	0	1	1	0	6	0	2	2	0	49	7	0	0	8	0	11	0	0	0	7
18:30:00	0	1	0	3	0	12	14	8	3	0	6	0	9	16	0	14	20	0	0	0	4	25	10	0	19	0	9	0	3	25	38	3	5	0	0	6	3	0	21	14	2	11	24	17	0	0	0	0	11
19:00:00	0	0	3	10	17	26	13	12	9	9	11	0	7	10	22	9	11	14	23	1	4	23	7	0	25	0	25	24	9	13	12	2	8	0	0	11	0	10	11	3	1	18	10	0	0	0	0	3	8
19:30:00	13	8	0	10	11	24	10	10	8	20	12	7	14	18	15	13	21	23	24	20	8	22	6	0	103	1	12	21	0	15	22	0	7	5	5	16	4	23	14	7	0	15	8	4	0	2	8	24	25
20:00:00	6	7	33	16	19	40	27	30	15	32	19	11	29	26	19	19	19	26	17	20	21	27	9	0	20	39	22	23	15	19	36	6	28	41	1	11	15	27	34	16	1	22	47	8	2	15	14	14	14
20:30:00	10	10	30	32	11	34	26	22	17	55	43	15	56	65	58	56	59	47	46	40	53	57	54	0	51	86	76	61	37	59	67	76	66	60	31	71	76	82	68	40	80	61	63	45	62	51	46	52	32
21:00:00	0	0	11	0	0	2	3	0	0	5	0	14	1	15	7	2	26	4	23	40	21	14	35	0	18	36	4	54	0	6	45	29	39	31	1	7	23	19	29	11	27	18	39	0	12	2	5	16	3
21:30:00	0	0	6	3	0	0	0	0	0	6	0	20	0	0	0	0	0	1	0	6	4	0	5	0	0	6	0	15	1	4	60	2	3	0	0	0	0	0	19	4	0	0	2	0	0	0	10	1	0
22:00:00	0	2	6	0	0	0	0	0	0	0	0	6	0	0	0	0	0	1	0	0	0	0	0	0	0	0	1	27	0	2	7	0	0	0	1	1	2	0	2	7	0	0	1	0	0	0	0	4	0
22:30:00	0	0	33	0	0	0	0	0	0	0	0	7	0	0	0	0	0	4	0	0	0	0	0	0	0	0	0	1	0	0	0	0	0	0	0	0	0	0	13	2	0	0	0	0	0	0	0	7	0
23:00:00	0	5	14	5	0	0	0	0	0	0	0	4	0	0	0	0	0	0	0	0	0	0	0	0	0	0	0	0	0	1	0	0	0	0	1	0	0	1	1	7	0	2	0	0	0	0	0	4	0
23:30:00	0	0	0	0	0	0	0	12	0	0	0	10	1	0	0	0	0	0	0	0	0	0	0	0	0	0	0	0	0	5	0	0	0	0	0	0	3	0	0	0	0	0	0	0	0	0	0	6	0
00:00:00	0	0	3	1	0	0	0	2	0	5	0	3	0	0	0	0	0	0	0	0	0	0	1	0	0	0	0	5	0	0	0	7	1	1	0	0	1	0	0	0	0	0	0	0	0	0	0	2	0
00:30:00	0	0	0	1	0	0	0	0	0	0	0	0	0	0	50	0	0	0	0	0	0	0	0	0	0	0	0	0	0	1	0	0	0	0	0	0	0	0	0	2	0	0	0	0	1	0	0	0	0
01:00:00	0	0	0	0	0	0	0	0	0	3	0	0	0	0	2	0	0	0	0	1	0	0	0	0	0	0	0	1	0	4	0	0	0	0	1	0	0	0	0	0	0	0	0	0	1	2	1	0	0
01:30:00	0	0	2	0	0	0	0	0	0	0	0	7	0	0	26	0	0	0	0	0	1	0	0	0	0	0	0	9	0	0	10	0	0	0	11	0	1	0	0	2	0	0	1	0	0	0	1	0	1
02:00:00	0	0	1	0	0	0	0	0	0	0	0	21	0	0	3	0	0	0	0	0	0	0	0	0	0	0	0	0	0	16	0	0	0	0	0	0	1	0	0	4	2	0	1	0	4	0	0	0	0
02:30:00	0	0	0	0	0	0	0	0	0	0	0	16	0	0	0	0	0	0	0	1	0	0	0	0	0	0	0	50	0	1	0	0	0	0	15	0	0	1	10	8	1	0	0	0	0	0	0	0	4
03:00:00	0	1	0	0	0	0	0	0	0	0	0	13	0	0	18	0	0	0	0	0	0	0	0	0	0	0	0	3	0	0	0	0	0	1	8	0	0	0	1	5	1	0	0	2	0	0	0	0	4
03:30:00	0	1	0	0	0	0	0	0	0	0	0	0	0	0	0	3	0	27	0	0	0	0	1	0	0	0	0	0	0	4	0	0	0	1	10	2	0	0	13	7	0	0	3	0	0	0	3	0	3
04:00:00	0	0	0	0	0	0	0	0	0	0	0	0	0	0	0	28	0	20	0	0	0	0	8	0	0	0	0	0	0	3	1	1	0	1	13	17	2	0	3	3	0	0	0	0	1	0	0	0	0
04:30:00	29	0	0	0	0	0	0	0	0	20	0	0	0	0	8	6	0	0	0	0	0	0	0	0	0	0	0	0	0	1	0	0	1	0	4	0	3	1	1	7	0	0	1	1	0	0	0	0	0
05:00:00	0	0	0	0	0	0	0	0	4	22	0	0	0	0	2	8	0	0	0	0	0	0	0	0	0	0	0	0	0	0	0	0	0	0	6	2	0	0	3	2	0	2	4	3	0	0	0	1	0
05:30:00	0	1	0	0	0	0	0	0	0	4	0	0	0	0	0	26	0	0	9	0	0	0	0	0	0	0	0	0	0	1	0	0	1	4	8	0	0	1	8	7	0	3	0	1	1	0	0	1	0
06:00:00	0	17	40	0	23	0	0	0	0	0	34	0	26	0	0	10	17	0	34	0	0	0	0	0	0	0	0	0	1	0	2	1	0	0	1	1	0	5	5	4	0	1	2	3	2	0	2	0	0
06:30:00	0	21	8	0	0	0	0	0	0	0	0	2	35	0	0	0	9	0	8	0	0	0	15	0	0	0	0	0	0	1	19	4	1	0	4	1	0	7	9	2	1	0	1	4	1	1	2	0	0
07:00:00	0	4	0	0	9	0	0	0	0	15	0	5	2	0	0	0	34	0	0	0	0	0	28	0	0	0	0	0	0	0	4	0	1	0	2	0	1	0	0	7	0	0	9	0	0	17	8	1	0
07:30:00	0	9	0	0	26	0	0	0	3	0	0	0	5	0	0	0	0	0	17	0	0	0	24	0	0	0	0	0	0	4	0	0	1	0	0	26	0	0	0	3	0	0	1	1	0	2	41	0	0
08:00:00	0	2	0	0	0	0	0	0	8	0	0	0	6	3	0	0	0	0	6	0	0	0	0	0	0	0	0	0	0	15	0	0	0	1	8	0	68	0	0	3	9	0	12	0	0	10	17	1	0
08:30:00	17	66	39	42	41	47	36	47	38	50	29	36	16	23	0	47	45	7	30	37	18	16	19	0	21	27	16	30	43	24	43	16	20	3	8	155	59	51	46	39	47	1	25	36	4	10	27	39	20
09:00:00	20	14	29	24	14	17	24	43	17	38	13	21	15	34	27	23	21	56	17	35	16	14	11	0	24	17	6	9	119	21	34	12	38	13	26	66	17	17	20	5	27	136	8	20	47	4	2	28	24
09:30:00	20	8	22	18	9	33	13	24	10	25	12	15	19	20	9	20	5	7	0	22	17	3	13	1	19	20	15	23	15	20	21	1	12	28	17	20	12	10	25	14	19	14	9	10	10	6	8	19	6
10:00:00	4	2	23	11	17	22	17	17	12	34	16	20	15	16	4	17	21	2	0	22	15	0	6	0	22	19	1	20	17	26	20	16	2	18	33	78	7	23	29	10	16	3	2	10	6	4	4	7	20
10:30:00	7	7	9	19	8	8	12	22	9	22	4	85	8	16	0	12	21	0	6	12	3	2	5	0	16	1	7	11	5	11	9	2	38	2	6	4	9	13	23	11	13	17	2	17	8	10	6	8	9
11:00:00	22	11	8	11	7	29	24	25	6	8	13	11	6	54	8	4	5	0	1	6	6	0	10	0	6	5	0	22	6	6	17	6	5	0	7	22	7	5	19	16	11	119	0	12	72	31	15	9	1
11:30:00	0	12	13	10	13	0	15	5	18	22	4	18	7	10	0	4	2	0	0	6	2	5	4	0	6	2	0	2	19	9	12	7	11	5	22	4	7	19	9	14	4	13	19	12	2	0	0	9	0
12:00:00	15	10	12	9	0	0	7	9	11	2	15	21	2	14	0	4	0	0	0	9	4	0	2	0	11	0	0	13	0	1	16	1	1	2	8	4	6	8	7	6	12	144	5	9	1	0	0	5	3
12:30:00	1	28	3	12	8	36	10	0	3	8	1	17	7	4	4	3	11	0	0	6	0	3	14	0	11	0	2	2	11	7	25	11	0	2	5	1	0	1	19	7	5	12	2	18	10	16	0	7	6
13:00:00	0	1	6	10	0	15	7	10	6	0	6	6	5	10	0	12	1	0	0	4	6	12	2	0	9	2	0	0	0	12	10	0	2	1	2	2	14	1	0	0	0	91	6	3	11	15	0	0	0
13:30:00	1	0	34	8	5	0	0	13	8	0	3	0	4	0	0	15	5	0	1	8	0	3	0	0	4	0	4	5	1	0	7	0	2	2	8	1	4	0	29	16	0	0	10	0	5	54	0	0	0
14:00:00	0	12	37	5	14	0	1	1	6	0	1	0	3	0	0	0	0	0	0	1	2	0	6	0	8	3	0	1	9	3	7	5	49	0	27	13	2	1	0	7	5	3	23	12	3	0	0	0	0
14:30:00	0	3	45	6	20	20	14	12	3	0	0	0	0	1	0	0	1	3	0	1	0	4	0	0	4	2	0	0	0	2	3	0	0	1	2	1	2	0	0	4	2	1	14	1	1	5	1	0	0
15:00:00	0	14	50	0	10	0	0	3	1	1	14	0	0	13	0	8	7	16	0	3	0	2	0	0	2	0	0	0	0	13	3	3	1	0	12	4	4	1	6	1	50	2	3	0	2	1	0	0	0
15:30:00	0	12	23	1	10	5	2	0	13	30	2	0	0	6	0	0	0	0	0	1	0	3	0	0	4	0	0	0	0	10	1	2	1	0	5	2	0	2	2	2	5	1	2	0	0	4	0	0	0
16:00:00	0	6	1	3	1	1	0	1	2	3	7	0	0	0	0	3	0	8	0	1	0	13	2	0	13	0	0	0	0	2	0	1	8	0	0	3	3	5	0	1	0	1	2	2	0	0	0	0	0
16:30:00	0	0	50	13	0	0	0	3	3	11	7	0	0	0	0	0	0	0	0	2	0	10	0	0	13	1	0	0	33	1	8	14	33	2	0	4	38	33	28	0	28	4	10	2	4	0	1	0	0
17:00:00	0	0	9	15	0	4	18	12	10	9	6	0	1	25	12	18	33	26	66	25	6	22	29	0	6	27	28	15	0	20	45	0	0	0	5	7	9	6	0	0	1	1	14	2	0	20	0	1	9
17:30:00	0	2	6	7	0	35	8	37	4	16	24	1	0	1	0	2	0	0	0	5	2	2	1	0	2	4	0	0	17	21	27	8	2	0	1	12	32	21	0	0	1	0	18	29	0	0	0	11	14
18:00:00	0	3	4	9	13	0	3	2	2	7	12	0	34	22	17	20	16	9	24	37	15	34	13	0	17	6	20	23	0	2	6	0	16	3	0	26	3	0	0	4	0	15	5	0	4	0	4	0	8
18:30:00	0	2	11	6	7	0	2	4	4	4	11	0	0	10	3	9	0	12	0	6	3	18	14	0	6	7	0	4	0	5	37	1	4	52	1	17	6	1	0	4	2	7	6	1	1	1	2	0	6
19:00:00	7	1	7	8	0	37	17	7	6	5	12	16	6	10	2	6	2	0	3	4	4	14	2	0	9	7	2	7	0	10	7	1	5	4	6	40	0	4	1	2	6	15	5	0	0	9	3	0	11
19:30:00	2	12	25	13	16	15	14	23	2	14	15	15	6	16	21	15	13	8	11	17	13	21	16	0	15	23	25	14	6	10	32	9	6	17	16	17	6	9	10	2	15	8	10	1	19	5	0	48	18
20:00:00	4	19	30	11	25	41	11	18	15	32	20	21	24	24	27	22	24	27	33	24	23	24	20	0	19	34	20	14	10	9	25	24	36	43	37	14	27	36	12	19	25	16	40	22	17	10	29	25	20
20:30:00	22	43	19	28	23	55	35	44	10	78	60	27	42	54	39	61	67	36	47	38	47	56	50	0	43	55	40	70	18	43	56	87	47	72	37	46	76	75	52	35	44	51	63	35	53	50	41	51	44
21:00:00	13	4	5	1	0	22	4	15	0	2	11	7	0	9	5	10	30	5	22	16	14	11	20	0	0	9	6	67	1	12	57	21	21	46	18	22	59	15	19	40	15	25	28	3	14	17	9	28	5
21:30:00	0	0	82	2	0	19	0	20	17	1	0	7	0	1	0	0	6	0	0	0	0	2	0	0	0	0	0	31	1	12	24	2	4	17	3	2	1	1	0	6	0	1	1	0	0	0	0	6	0
22:00:00	0	1	39	0	0	0	23	1	7	0	0	3	0	0	0	3	30	0	0	0	0	3	0	1	0	0	0	24	0	1	24	0	2	1	1	0	0	0	0	4	1	0	0	0	0	0	0	0	0
22:30:00	0	0	4	0	0	0	1	13	0	0	0	0	0	2	0	9	1	0	0	1	0	0	0	0	0	0	0	0	0	3	0	0	1	0	6	1	1	2	0	0	1	0	0	0	0	1	1	0	0
23:00:00	0	4	21	0	0	0	1	5	0	18	0	0	0	0	0	0	1	0	0	0	0	0	0	0	0	0	0	0	0	1	0	0	2	0	2	0	0	0	0	2	0	0	25	0	0	0	1	6	0
23:30:00	0	2	17	0	3	10	0	4	0	4	0	1	0	0	0	0	1	0	0	0	0	0	0	0	0	0	0	0	8	16	0	1	0	0	0	0	1	0	0	0	0	0	4	0	0	1	2	1	2
00:00:00	0	27	1	0	0	11	0	24	0	8	0	29	0	0	0	0	1	0	0	0	0	0	0	0	0	0	0	0	0	7	0	0	0	0	33	0	0	1	1	0	0	0	0	0	0	0	0	2	0
00:30:00	0	1	0	0	6	0	0	18	0	9	0	0	0	0	0	1	3	0	0	0	0	0	0	0	0	0	0	0	1	0	0	2	3	2	0	0	0	0	0	4	1	0	0	0	0	0	0	1	0
01:00:00	0	0	0	0	0	0	0	0	0	5	0	0	0	0	0	0	0	0	0	0	0	0	0	0	0	0	0	0	29	6	3	1	4	0	0	5	3	0	1	0	2	2	19	0	0	0	0	0	0
01:30:00	0	0	0	0	0	40	0	0	0	39	0	4	1	0	0	0	0	0	0	1	0	0	0	0	0	0	0	0	0	2	3	0	1	0	0	0	3	0	0	1	0	3	0	0	2	7	22	0	0
02:00:00	0	0	34	0	10	0	0	0	0	36	0	9	0	0	2	0	0	0	0	0	0	2	0	0	0	9	0	37	4	0	1	0	0	1	0	0	0	0	0	0	0	12	0	0	0	0	30	1	1
02:30:00	0	1	10	0	0	0	0	0	0	12	0	2	0	0	42	0	0	0	5	0	0	1	0	0	0	8	0	18	0	3	16	0	5	0	2	0	0	5	0	0	1	2	7	0	0	0	55	2	0
03:00:00	0	0	0	1	0	0	1	0	0	0	0	0	0	15	0	0	0	0	13	0	0	0	0	0	0	2	0	10	1	1	2	1	1	0	1	1	1	7	0	1	0	3	0	0	0	0	24	0	0
03:30:00	0	0	0	1	0	0	6	54	0	41	0	1	0	2	0	0	0	0	0	0	0	2	0	1	0	6	0	0	6	8	0	0	8	0	4	1	2	4	1	1	2	0	19	0	2	1	14	0	0
04:00:00	0	0	0	0	0	8	0	2	0	0	0	4	0	0	0	0	0	0	4	0	0	0	0	1	0	0	0	0	79	0	2	2	1	1	24	3	9	4	0	1	1	0	0	0	2	0	4	0	0
04:30:00	0	61	0	0	3	0	3	0	0	0	0	0	0	0	0	0	0	0	3	0	0	0	0	0	0	0	0	0	0	7	0	2	13	0	8	2	3	8	0	1	0	0	0	0	4	1	1	1	0
05:00:00	0	6	0	0	0	2	0	0	0	3	0	0	0	0	1	0	0	0	0	0	0	0	0	0	0	2	0	0	2	7	1	2	4	0	3	2	0	3	1	0	2	0	0	0	0	1	0	1	0
05:30:00	0	0	0	0	0	0	0	1	0	4	0	0	0	0	1	0	0	0	1	0	0	0	0	0	0	0	0	0	1	1	24	1	5	0	7	3	0	0	0	4	1	0	0	0	0	0	0	0	0
06:00:00	4	0	0	0	0	0	0	2	0	0	0	0	4	0	0	0	0	0	23	0	0	0	0	0	0	0	0	0	2	3	27	0	2	0	0	3	0	0	0	2	0	0	0	0	0	7	3	0	0
06:30:00	0	1	0	34	0	0	0	24	0	9	0	31	0	0	0	0	0	0	0	0	0	0	0	0	0	0	0	0	7	7	0	1	0	0	3	24	0	0	0	1	0	0	0	0	3	0	3	0	0
07:00:00	0	0	17	0	17	0	0	5	31	0	34	0	2	0	0	1	0	0	0	0	0	0	0	0	0	0	0	37	6	3	16	0	5	0	10	14	0	0	3	3	1	9	1	0	7	1	4	0	0
07:30:00	0	0	0	0	0	0	0	0	0	0	34	0	0	0	2	2	12	0	0	0	0	0	30	0	0	0	0	25	1	2	1	3	3	0	1	9	0	3	0	2	10	4	0	0	3	0	2	16	0
08:00:00	0	6	0	0	0	0	0	0	0	0	0	0	10	17	0	27	22	23	0	0	0	0	9	0	0	0	0	22	0	3	34	40	0	0	0	21	0	4	26	1	9	0	0	1	1	1	1	2	0
[truncated: 81 more columns]

## Sheet: Fig 1 B (OR HFD)
FED	M21-7.23																M22-7.23															M23-7.23																+sucrose	+sucrose SEM
20:30:00	42	55	36	40	19	32	59	0	25	32	59	62	62	33	44	20	2	107	47	26	4	32	28	13	27	20	40	48	27	31	37	2	20	50	39	22	7	26	27	15	44	11	61	6	42	9		32.3913	3.04562
21:00:00	0	2	0	12	0	0	0	0	12	0	0	18	11	0	22	0	0	3	5	0	0	0	0	0	16	6	3	10	0	0	0	0	0	1	0	0	0	3	0	1	25	0	26	0	0	0		3.82609	1.05286
21:30:00	0	0	0	0	0	0	0	30	0	0	0	18	0	0	8	0	0	0	0	0	0	0	0	0	0	0	0	0	0	0	0	0	0	0	0	0	0	0	0	0	0	0	15	0	0	0		1.54348	0.823394
22:00:00	0	0	0	0	0	0	0	12	0	0	0	0	0	10	17	0	0	0	0	0	0	0	0	0	0	0	0	0	0	0	0	2	0	0	0	0	0	0	0	0	0	0	0	0	0	0		0.891304	0.491698
22:30:00	0	0	0	0	0	0	0	0	0	0	0	0	0	10	13	0	0	0	0	0	0	0	0	0	0	0	0	0	0	0	0	11	0	0	0	0	0	0	0	0	0	0	0	19	0	0		1.15217	0.577323
23:00:00	0	0	0	0	0	0	0	0	0	0	0	26	0	0	9	0	0	0	0	0	0	0	0	0	0	0	25	0	0	0	0	15	0	0	0	0	0	0	0	0	0	9	0	4	0	0		1.91304	0.861314
23:30:00	0	0	0	0	0	0	0	0	0	0	0	0	0	0	2	0	0	0	0	0	0	0	0	0	0	0	6	0	0	0	0	95	1	0	0	0	0	0	0	0	88	0	0	12	0	0		4.43478	2.78447
00:00:00	0	0	16	0	0	0	0	0	0	27	0	0	0	0	0	0	0	0	0	2	0	0	0	0	4	0	11	0	0	0	0	19	73	0	0	0	0	0	0	0	11	4	0	0	0	0		3.63043	1.75101
00:30:00	0	0	7	0	0	24	0	0	0	8	0	0	0	0	33	0	0	0	0	0	0	0	0	0	0	0	0	0	0	0	0	4	0	0	0	0	0	12	0	0	17	1	0	0	0	0		2.30435	0.978942
01:00:00	0	0	0	0	0	0	0	0	0	0	0	0	0	0	6	0	4	0	0	0	0	0	0	0	0	0	0	0	0	0	0	63	0	0	0	0	0	0	0	0	0	5	0	0	0	0		1.69565	1.37503
01:30:00	0	0	0	0	0	0	0	0	0	0	0	0	0	0	0	0	0	0	0	0	0	0	0	0	0	0	0	0	14	0	0	0	6	0	0	0	0	2	0	0	0	0	0	2	0	0		0.521739	0.331501
02:00:00	0	0	0	0	0	0	0	0	0	0	0	0	0	0	0	0	0	0	0	0	1	0	0	0	0	0	0	0	0	0	0	0	0	0	0	0	0	0	0	0	0	0	0	0	0	0		0.0217391	0.0217391
02:30:00	0	0	0	0	0	0	0	0	0	0	0	0	0	8	0	16	0	0	0	0	28	47	0	0	0	0	0	0	0	0	0	0	0	0	0	0	0	0	0	7	0	0	0	0	0	0		2.30435	1.22725
03:00:00	0	0	0	4	0	0	0	0	0	0	0	0	0	0	0	4	14	0	10	0	7	12	0	0	0	0	0	0	0	0	0	0	0	0	0	0	0	0	0	8	0	0	0	0	0	0		1.28261	0.496036
03:30:00	0	0	0	8	0	0	0	0	0	10	0	0	0	0	0	6	1	0	6	0	0	0	0	0	0	0	0	0	0	0	0	0	0	0	0	0	0	0	0	0	0	0	52	0	0	0		1.80435	1.16122
04:00:00	0	0	0	6	0	0	0	0	0	11	0	0	0	0	0	0	11	0	4	0	0	0	0	0	0	0	0	0	0	0	0	0	0	0	0	0	0	0	0	0	16	0	0	0	0	0		1.04348	0.49143
04:30:00	0	0	0	0	0	0	0	0	0	0	0	0	0	0	0	0	0	0	6	0	0	0	0	0	0	0	0	0	0	0	0	0	0	0	0	0	0	0	0	0	0	7	0	4	0	0		0.369565	0.213909
05:00:00	0	0	0	0	0	0	0	0	0	0	0	0	0	0	0	0	0	0	10	1	0	0	1	0	0	0	0	0	0	0	15	0	0	0	0	0	0	0	0	0	0	0	0	0	0	0		0.586957	0.387705
05:30:00	3	0	0	0	0	0	0	0	0	0	0	0	0	0	0	0	0	1	8	0	0	0	0	0	0	0	0	0	0	0	0	0	0	0	0	0	0	0	0	0	0	0	0	15	0	0		0.586957	0.369849
06:00:00	14	0	0	0	0	0	0	0	0	0	0	0	0	8	0	0	0	8	14	0	0	0	0	0	0	0	0	24	0	0	0	0	0	0	0	0	0	0	0	0	0	0	0	6	0	0		1.6087	0.699536
06:30:00	2	0	0	0	0	0	0	0	0	0	0	0	7	0	0	0	0	0	6	0	0	0	0	0	0	0	0	2	0	0	0	12	0	0	0	0	0	0	0	0	0	0	0	0	5	0		0.73913	0.338275
07:00:00	0	0	0	0	0	0	0	0	26	0	0	0	67	0	0	0	0	0	3	0	15	0	0	0	0	5	0	0	0	0	0	0	0	0	0	0	0	0	0	0	0	0	0	2	0	1		2.58696	1.57289
07:30:00	0	0	0	0	0	0	0	0	12	0	0	25	42	0	0	0	0	0	0	0	0	0	0	0	0	7	0	0	0	0	0	6	0	0	0	0	0	0	0	0	0	0	0	15	0	7		2.47826	1.12277
08:00:00	0	0	0	0	0	0	0	0	0	0	23	32	4	0	0	0	0	0	0	0	0	0	0	0	0	0	0	0	0	0	0	16	0	0	0	0	0	0	0	0	0	0	0	0	0	0		1.63043	0.906956
08:30:00	9	27	15	24	14	20	24	1	19	22	6	14	2	15	35	29	4	13	17	13	2	0	42	16	0	14	2	28	18	10	14	157	1	16	6	18	18	0	31	10	33	5	4	1	7	2		16.913	3.48244
09:00:00	25	18	0	19	32	25	39	27	18	18	10	14	0	11	19	48	4	6	15	13	28	3	34	33	10	5	5	24	12	18	23	19	0	17	7	30	20	4	45	5	30	20	5	4	41	8		17.6304	1.83876
09:30:00	18	8	0	7	8	2	32	83	6	11	24	6	0	2	11	0	2	2	11	10	7	12	24	12	4	0	2	14	27	11	17	38	11	15	5	15	13	0	8	4	18	42	21	6	15	17		13.0652	2.12244
10:00:00	18	16	12	15	19	6	17	30	25	7	2	4	16	16	15	28	0	17	8	9	15	9	22	14	5	0	1	5	14	20	15	19	3	6	5	7	3	5	10	23	2	38	10	24	11	7		12.4565	1.27052
10:30:00	23	13	10	8	8	4	27	0	0	9	14	15	8	26	19	10	4	0	0	7	0	10	6	33	0	5	4	7	4	12	8	8	7	0	0	16	3	0	22	11	28	21	14	5	15	0		9.65217	1.27147
11:00:00	15	5	0	15	3	7	12	0	23	3	1	21	14	4	11	10	6	0	0	8	5	0	12	19	3	3	1	4	6	7	18	20	6	6	8	0	3	0	9	9	8	4	14	0	19	11		7.67391	0.963114
11:30:00	33	0	0	15	0	10	8	0	11	19	16	3	8	4	16	10	0	7	14	10	9	0	2	12	1	4	1	4	13	0	6	2	12	5	2	0	7	17	15	12	3	7	10	0	10	13		7.63043	1.00883
12:00:00	13	16	0	4	9	2	21	0	8	6	10	9	11	4	7	0	5	13	3	4	23	58	14	10	0	0	5	0	10	39	13	4	0	0	9	9	17	39	0	33	7	6	22	7	16	0		10.5652	1.76839
12:30:00	37	1	0	20	9	12	9	0	0	2	14	2	6	10	13	25	1	8	20	4	6	4	0	2	2	1	7	12	2	10	9	10	4	0	0	0	0	0	3	1	4	0	11	0	1	0		6.13043	1.1347
13:00:00	53	0	1	4	9	1	17	1	18	16	7	30	9	3	4	5	4	0	11	8	9	0	10	3	1	7	1	1	5	2	0	6	2	13	8	10	4	0	7	8	12	6	29	2	18	41		8.82609	1.59689
13:30:00	15	13	17	11	7	1	3	1	2	6	8	17	10	0	6	9	1	2	11	8	2	0	0	1	0	18	0	14	12	13	6	3	0	0	4	0	0	15	0	0	2	6	20	0	5	2		5.8913	0.89563
14:00:00	12	26	0	3	3	6	20	2	0	34	22	13	8	0	0	5	2	0	0	6	19	20	9	0	0	12	4	2	9	19	0	0	2	0	0	0	0	0	36	23	5	1	17	7	13	0		7.82609	1.42588
14:30:00	22	5	0	2	21	6	11	0	9	13	26	10	3	1	6	2	2	0	4	3	0	10	2	0	2	4	0	0	0	10	0	0	0	0	0	0	14	8	0	10	5	1	20	1	8	3		5.30435	0.984356
15:00:00	0	21	0	10	0	6	10	4	12	12	8	19	9	7	15	13	0	4	13	0	15	0	4	6	3	17	17	2	6	1	8	0	10	0	7	0	0	2	3	21	14	9	16	0	1	0		7.06522	0.964291
15:30:00	5	18	0	5	0	0	13	1	0	4	11	13	9	0	20	0	2	0	0	0	7	0	2	12	0	8	6	0	13	35	18	0	0	0	0	0	0	8	1	0	4	0	19	2	8	0		5.30435	1.11332
16:00:00	0	1	0	7	17	2	2	1	9	14	9	14	7	4	5	10	1	4	0	0	7	0	10	4	0	32	2	13	0	0	8	0	0	0	2	0	0	12	0	9	2	3	10	4	11	1		5.15217	0.930932
16:30:00	12	20	0	6	1	8	25	9	8	19	4	21	6	0	6	11	5	0	23	3	3	0	0	8	1	6	0	2	8	2	32	0	0	3	0	0	0	1	0	10	2	0	19	5	72	16		8.19565	1.84486
17:00:00	20	28	0	14	22	21	31	5	4	31	16	33	22	0	8	19	4	8	10	28	33	0	25	2	1	6	0	2	10	9	11	0	0	8	2	24	11	0	1	12	16	1	18	12	14	19		12.1957	1.53812
17:30:00	11	0	0	17	0	26	5	1	11	19	14	16	10	17	13	5	4	11	6	4	14	8	1	2	0	11	4	2	3	6	15	12	0	0	4	3	0	0	0	11	8	2	19	5	64	0		8.34783	1.57401
18:00:00	15	11	0	6	15	15	6	0	2	9	8	23	13	0	15	22	4	0	16	6	8	29	6	4	4	22	4	15	6	7	13	7	0	0	2	1	4	0	8	8	10	0	28	0	9	11		8.52174	1.12664
18:30:00	8	1	4	6	15	12	14	1	8	11	7	14	4	2	7	5	11	4	15	2	15	12	2	6	6	23	2	7	2	2	0	0	0	0	0	0	0	21	4	21	10	15	14	0	11	0		7.04348	0.949425
19:00:00	29	16	12	12	2	8	24	0	12	17	15	27	11	8	10	12	13	0	20	10	17	63	13	5	5	33	2	7	6	9	0	2	0	8	6	0	0	6	5	8	14	2	93	5	17	2		12.7391	2.42579
19:30:00	14	15	28	16	10	17	33	8	4	21	19	31	7	2	17	11	16	5	27	8	16	42	10	11	11	28	10	10	22	17	17	0	1	2	16	10	18	7	35	22	15	7	29	11	20	23		15.6304	1.4068
20:00:00	26	23	24	19	14	15	28	5	16	20	27	28	17	7	10	33	22	10	17	15	37	43	20	13	26	23	6	12	10	21	19	10	3	16	20	31	15	22	21	18	31	11	34	7	25	38		19.7391	1.36783
20:30:00	73	65	96	42	25	39	85	18	25	54	65	66	65	36	31	33	29	48	50	51	39	65	70	42	79	98	36	52	22	66	64	29	25	31	57	55	36	39	73	83	54	31	92	23	40	47		50.9565	3.13404
21:00:00	0	17	0	7	0	0	49	0	0	0	6	30	13	0	2	4	0	10	23	3	5	15	0	1	20	22	1	19	0	30	10	0	0	2	0	0	0	0	27	3	1	0	12	0	0	0		7.21739	1.62852
21:30:00	0	1	0	0	0	0	2	0	0	0	3	4	0	0	0	5	0	0	1	0	17	1	0	0	0	0	0	1	0	0	0	2	0	0	0	0	0	0	8	0	0	0	0	0	0	0		0.978261	0.42334
22:00:00	0	5	0	0	0	0	0	0	0	0	0	0	0	0	0	5	0	0	2	0	5	0	0	0	0	0	0	0	0	0	0	19	0	0	0	0	0	0	9	0	0	0	0	2	0	0		1.02174	0.480025
22:30:00	0	2	0	0	0	0	0	0	9	0	0	0	0	0	0	68	0	0	0	0	7	0	0	0	0	0	0	0	0	0	0	6	0	0	0	0	0	0	0	0	0	0	0	0	0	0		2	1.49233
23:00:00	0	0	0	0	0	0	0	0	0	0	0	0	0	0	0	0	0	0	0	0	11	7	0	0	0	0	0	0	0	0	0	12	0	0	0	0	0	0	21	0	0	1	0	0	0	0		1.13043	0.580362
23:30:00	0	12	0	0	0	0	0	0	0	0	0	0	0	0	0	11	0	0	0	0	0	15	0	0	0	0	0	0	0	0	0	5	0	0	0	0	0	0	0	0	0	0	0	0	0	0		0.934783	0.47893
00:00:00	0	4	0	0	0	0	0	0	0	0	0	0	0	0	0	7	0	0	0	0	0	0	0	0	0	0	0	0	0	0	0	28	0	0	0	0	0	0	9	0	0	0	0	0	0	0		1.04348	0.651981
00:30:00	0	2	0	0	0	0	0	0	0	0	0	0	0	0	0	20	0	0	0	0	0	0	0	0	0	0	0	0	0	0	0	0	0	0	0	0	0	0	1	0	0	0	0	0	0	0		0.5	0.436001
01:00:00	0	1	0	0	0	0	6	0	0	0	0	0	0	0	0	1	0	0	0	0	0	4	2	0	0	0	0	0	0	0	0	0	0	0	0	0	0	0	11	0	0	0	0	0	0	0		0.543478	0.282683
01:30:00	3	14	0	0	0	0	0	0	0	0	0	0	0	0	0	5	0	0	0	0	0	0	0	0	0	0	0	0	0	0	0	0	0	0	0	0	0	0	1	0	0	0	0	0	0	0		0.5	0.325636
02:00:00	1	6	0	0	0	0	4	0	0	0	0	0	0	0	0	9	0	0	0	0	0	0	0	0	0	0	0	0	0	0	0	0	0	0	0	0	0	0	5	0	0	11	0	0	0	0		0.782609	0.348791
02:30:00	12	12	0	0	0	0	22	0	0	0	0	0	0	0	0	19	0	0	0	0	0	1	0	0	0	0	0	0	0	0	0	0	0	0	0	0	0	0	11	0	0	0	0	0	0	0		1.67391	0.737573
03:00:00	1	0	0	0	0	0	2	7	0	0	0	0	0	0	0	3	0	0	0	0	0	0	0	0	0	0	0	0	5	0	0	0	0	0	0	0	0	0	1	0	0	17	0	0	0	0		0.782609	0.411094
03:30:00	4	0	0	0	0	0	9	0	0	0	0	0	0	0	0	0	0	24	0	0	0	0	0	0	0	0	0	0	0	0	0	0	0	0	0	0	0	0	7	0	0	0	0	2	0	0		1	0.573151
04:00:00	0	0	0	0	0	0	14	0	0	0	0	0	0	0	0	0	0	0	0	0	0	0	0	0	0	0	0	0	0	0	0	0	0	0	0	0	0	0	18	1	0	0	0	26	0	0		1.28261	0.736005
04:30:00	0	5	0	0	0	0	8	0	0	0	0	0	0	0	0	0	0	0	0	0	0	0	0	0	0	0	0	0	0	0	0	0	0	0	0	0	0	0	2	3	0	73	0	0	0	0		1.97826	1.5927
05:00:00	1	1	0	17	0	0	0	4	0	0	0	0	0	0	0	0	0	0	0	0	0	0	0	0	0	0	0	0	0	0	0	0	0	0	0	0	0	3	0	0	0	3	0	1	0	0		0.652174	0.384755
05:30:00	0	0	0	0	0	0	4	0	0	7	0	0	0	0	0	12	0	0	0	0	0	0	0	0	0	0	0	0	0	0	0	0	0	0	0	0	0	1	2	10	0	3	0	0	0	0		0.847826	0.374253
06:00:00	0	0	0	0	0	0	1	5	0	26	0	0	0	0	0	31	0	0	0	0	0	0	0	0	0	0	0	0	0	0	0	0	0	0	0	0	0	31	3	11	0	0	0	0	0	0		2.34783	1.09906
06:30:00	0	0	0	0	0	0	5	2	0	3	0	1	0	0	0	0	0	0	0	0	0	0	0	0	0	0	0	0	0	0	0	1	0	0	0	0	0	0	3	13	0	29	0	1	0	0		1.26087	0.69047
07:00:00	0	0	0	0	0	0	1	0	0	0	0	5	0	0	0	0	0	0	0	0	0	4	0	0	0	0	0	0	0	0	0	0	0	0	0	0	0	0	5	1	0	0	0	1	0	0		0.369565	0.174064
07:30:00	0	0	0	0	0	0	7	15	0	5	0	0	0	0	0	0	0	0	0	0	0	4	0	0	0	0	0	0	0	0	0	0	0	0	0	0	0	0	0	0	0	1	0	0	0	0		0.695652	0.3767
08:00:00	0	0	0	0	0	30	1	0	0	32	0	0	0	0	0	0	0	0	0	0	0	0	0	0	0	0	0	0	0	0	0	0	0	0	0	0	0	0	0	0	0	0	12	0	0	0		1.63043	0.969764
08:30:00	45	1	41	16	35	26	67	2	24	33	19	34	37	21	29	38	5	30	27	12	38	33	37	27	9	4	2	12	22	24	13	19	9	15	7	28	20	0	45	28	26	39	37	0	13	20		23.2391	2.1466
09:00:00	52	30	8	31	22	26	44	0	43	16	30	33	26	22	27	25	2	8	34	18	44	45	45	26	0	13	5	26	14	25	17	33	13	15	22	24	8	13	18	38	54	30	39	0	34	27		24.4565	2.05896
09:30:00	44	6	14	29	27	29	21	0	26	17	16	28	20	20	14	14	1	7	20	14	38	20	29	18	0	13	10	20	10	26	44	22	6	12	27	20	18	28	25	33	29	15	34	13	21	31		20.1957	1.53843
10:00:00	38	15	1	14	18	16	18	0	15	37	6	23	33	12	10	23	0	10	21	18	26	17	24	10	3	39	12	17	16	29	19	11	6	7	14	14	9	7	7	15	28	18	25	2	25	6		15.9565	1.45892
10:30:00	39	1	7	17	2	3	40	0	25	10	27	28	17	7	8	6	0	8	21	12	33	11	22	10	3	20	16	12	5	21	17	19	3	14	14	16	3	25	11	21	17	13	27	2	17	13		14.413	1.46837
11:00:00	29	4	0	16	21	23	23	5	20	10	13	19	19	15	8	10	0	8	11	14	17	10	27	8	3	10	6	8	7	19	14	19	10	12	6	6	4	9	5	16	13	16	25	6	19	22		12.7174	1.06352
11:30:00	33	12	3	18	10	7	8	0	16	12	18	30	13	11	19	4	2	4	17	11	24	17	14	4	3	5	4	8	2	12	19	5	11	4	7	11	5	9	6	16	17	6	21	0	21	4		10.9348	1.13205
12:00:00	34	16	1	21	0	1	13	0	20	5	11	20	15	10	19	3	0	6	18	11	14	0	10	0	5	23	2	0	16	20	20	8	0	4	6	6	2	2	6	21	16	9	33	11	25	15		10.8261	1.3367
12:30:00	30	1	0	23	33	14	30	16	35	15	19	31	26	22	23	20	2	6	16	20	41	1	6	18	0	12	1	5	8	28	26	15	4	0	11	17	9	1	8	22	20	16	28	3	20	16		15.6087	1.60659
13:00:00	18	0	0	18	1	8	13	9	20	13	13	21	26	8	20	0	4	12	16	20	32	27	9	7	0	24	2	20	8	16	16	5	7	13	9	6	0	0	5	12	19	5	35	7	27	14		12.2826	1.339
13:30:00	26	0	0	16	19	9	15	0	0	17	6	22	20	4	13	0	1	3	12	5	5	14	10	1	0	10	0	6	2	10	10	4	6	1	8	4	4	2	6	14	4	0	15	0	19	21		7.91304	1.07264
14:00:00	10	23	0	13	0	13	0	4	8	3	8	20	7	3	7	0	0	3	16	1	187	0	8	0	0	20	0	2	9	12	8	4	0	0	2	0	0	5	3	12	11	0	20	2	19	2		10.1087	4.05318
14:30:00	18	0	0	9	0	0	9	2	20	5	5	22	11	0	13	0	0	1	14	5	2	0	7	6	0	15	0	2	2	3	5	2	6	0	0	12	3	0	0	14	9	14	19	0	11	15		6.1087	0.970198
15:00:00	12	6	0	15	0	8	0	0	10	19	10	14	24	0	0	1	0	0	8	1	0	28	1	1	0	19	0	0	3	0	0	0	3	0	2	21	39	0	1	0	6	0	19	2	13	1		6.23913	1.35139
15:30:00	0	0	0	19	0	14	1	0	3	7	5	26	15	15	14	42	0	1	5	8	27	9	0	39	0	5	0	0	1	0	6	0	0	0	2	11	0	0	3	10	3	0	5	12	3	0		6.76087	1.47906
16:00:00	6	11	0	7	0	4	0	4	0	17	11	18	5	8	6	26	0	3	0	0	4	23	0	0	0	13	0	1	0	0	6	0	0	0	0	0	0	0	0	0	0	0	8	2	10	0		4.19565	0.955846
16:30:00	15	1	2	9	0	3	0	8	24	10	22	18	31	2	8	33	0	31	26	18	44	41	18	0	21	23	30	7	13	0	26	0	0	0	0	0	13	0	0	12	14	2	18	0	22	11		12.5217	1.82329
17:00:00	11	12	0	10	17	11	14	2	6	5	14	17	19	10	7	0	0	0	16	12	7	12	0	7	4	9	6	1	7	0	2	5	0	0	0	0	0	0	0	0	0	0	7	5	0	12		5.80435	0.866232
17:30:00	19	25	0	6	4	22	10	2	0	13	6	15	26	0	5	0	0	17	6	2	11	0	15	0	5	7	3	1	0	0	21	2	0	0	0	0	10	0	2	12	14	0	14	6	2	9		6.78261	1.12199
18:00:00	8	2	0	5	0	14	8	124	7	4	23	17	13	0	10	0	0	0	5	3	6	0	0	7	6	26	6	0	5	2	0	0	0	20	1	0	0	0	0	2	6	5	4	12	11	13		8.15217	2.74838
18:30:00	2	1	0	13	14	12	15	3	0	14	8	25	11	3	16	6	0	0	5	2	4	4	0	2	16	26	11	16	6	2	0	0	0	0	1	0	0	0	0	16	15	0	50	23	14	2		7.78261	1.45692
19:00:00	11	1	0	12	0	12	14	4	14	22	11	22	17	1	6	6	0	1	17	0	11	9	8	4	15	23	12	6	7	2	0	0	0	1	2	0	2	0	0	9	1	5	20	5	6	23		7.43478	1.07481
19:30:00	23	19	5	15	4	0	20	9	7	10	23	23	20	4	9	7	3	3	17	6	16	2	0	6	18	19	11	6	2	4	4	2	2	4	8	2	0	0	3	6	12	0	26	0	4	13		8.63043	1.12562
20:00:00	27	14	11	17	16	22	22	13	7	21	22	38	30	19	18	14	7	11	17	12	19	17	10	16	28	18	14	12	24	10	16	13	0	23	23	5	8	25	11	13	16	11	37	15	27	22		17.1957	1.14825
20:30:00	98	67	80	53	19	57	79	29	32	32	77	71	81	59	44	38	63	30	78	59	64	76	63	26	62	38	40	59	23	69	67	33	14	34	81	78	36	50	62	84	81	52	84	36	74	34		55.7826	3.14127
21:00:00	3	13	15	6	0	20	57	2	0	0	20	53	50	23	2	0	0	0	28	6	2	31	9	13	22	19	5	17	0	48	27	1	10	56	36	33	0	4	51	12	38	0	81	0	4	0		17.7609	2.98583
21:30:00	0	0	1	2	0	0	17	28	0	0	0	13	0	0	0	0	0	0	20	0	0	7	0	0	0	7	0	0	0	8	0	14	6	0	0	0	0	0	22	0	9	0	43	0	0	0		4.28261	1.32083
22:00:00	0	0	0	0	0	0	0	0	0	0	0	18	0	0	0	0	0	0	1	0	5	0	0	0	0	0	0	0	0	0	0	0	14	1	0	0	0	0	4	0	0	0	3	0	0	0		1	0.50409
22:30:00	0	0	0	0	0	0	0	0	0	0	0	1	0	0	0	0	0	0	0	0	1	0	0	0	0	0	0	0	0	0	0	0	3	16	0	0	0	0	0	0	0	0	0	0	0	0		0.456522	0.352639
23:00:00	0	0	0	0	0	0	0	0	0	0	0	0	0	0	0	0	0	0	0	0	1	0	0	0	0	0	0	0	0	0	0	0	0	3	0	0	0	0	0	0	0	0	1	0	0	0		0.108696	0.0710736
23:30:00	0	0	0	0	0	0	0	0	0	0	0	0	0	0	0	0	9	0	0	0	5	19	0	0	0	0	0	0	0	0	0	0	0	2	0	0	0	0	0	0	0	0	6	0	0	0		0.891304	0.476732
00:00:00	0	0	0	0	0	0	0	1	13	2	1	0	0	0	0	0	0	0	0	0	7	0	0	0	0	0	0	0	0	0	0	0	0	10	0	0	0	0	0	0	0	0	0	0	0	0		0.73913	0.379976
00:30:00	0	0	0	0	0	5	0	0	43	2	0	0	0	0	0	0	0	0	0	0	1	0	0	0	0	0	0	0	0	0	0	0	0	0	0	0	0	0	0	0	0	0	0	0	0	0		1.1087	0.938304
01:00:00	0	0	0	0	0	10	0	0	5	9	0	1	0	0	0	0	0	0	0	0	2	0	0	0	0	0	0	0	0	0	0	0	0	12	0	0	0	0	0	0	0	0	0	0	0	0		0.847826	0.394365
01:30:00	0	0	0	0	0	0	0	0	0	0	0	2	0	0	0	0	0	0	0	0	3	0	0	0	0	0	0	0	0	0	0	0	0	0	0	0	0	0	0	0	0	0	0	0	0	0		0.108696	0.0775735
02:00:00	0	0	0	0	0	1	0	0	42	0	0	1	0	0	0	0	0	0	0	0	6	0	0	0	0	0	0	0	0	0	0	0	0	0	0	0	0	0	0	0	0	0	0	0	0	0		1.08696	0.918845
02:30:00	0	0	0	20	6	3	0	0	30	0	0	0	0	0	0	0	0	0	0	0	0	0	0	0	0	0	0	0	0	0	0	0	0	0	0	0	0	0	0	0	0	0	0	0	0	0		1.28261	0.783072
03:00:00	0	0	0	10	0	16	0	0	32	0	6	0	0	0	0	0	0	0	0	0	10	0	0	0	0	0	5	0	0	0	0	0	0	0	0	0	0	0	0	0	0	0	0	0	0	0		1.71739	0.823955
03:30:00	0	0	0	5	0	0	0	0	9	0	1	0	0	0	0	0	0	0	0	0	6	0	0	0	0	0	29	0	0	0	0	0	0	0	0	0	0	0	0	0	0	0	0	1	0	0		1.1087	0.669724
04:00:00	0	0	0	8	0	0	0	0	28	0	0	0	0	0	0	0	0	0	0	0	0	0	0	0	0	0	6	0	0	0	0	0	4	0	0	0	0	0	0	0	0	0	0	1	0	0		1.02174	0.641924
04:30:00	0	0	0	0	0	0	0	0	4	0	0	0	0	0	0	0	0	0	0	0	1	1	1	0	0	0	0	0	0	0	0	0	0	0	0	0	0	7	0	0	0	0	0	0	0	0		0.304348	0.175476
05:00:00	0	0	0	4	0	0	0	0	0	0	0	0	0	0	0	0	0	0	0	0	12	0	0	0	0	0	0	8	0	0	0	0	0	0	0	0	0	0	0	0	0	0	0	0	0	0		0.521739	0.31963
05:30:00	0	0	0	13	24	0	0	31	0	0	0	0	0	0	0	0	0	0	0	0	2	0	0	0	0	0	0	0	0	0	0	0	2	0	0	0	0	0	0	0	0	0	0	0	0	0		1.56522	0.879532
06:00:00	0	0	0	0	10	0	0	6	0	0	0	0	0	0	0	0	0	0	0	0	0	0	0	0	0	0	0	0	0	0	0	0	4	24	0	0	0	0	7	0	0	0	0	0	0	0		1.1087	0.589955
06:30:00	0	0	0	0	0	0	0	2	0	0	0	0	0	0	0	0	0	0	0	0	0	0	0	0	0	0	0	0	0	0	0	0	3	0	0	0	0	0	1	0	0	0	0	0	0	0		0.130435	0.0799075
07:00:00	0	0	0	0	0	0	0	0	0	0	0	0	0	0	0	0	0	0	0	0	0	0	0	0	0	0	0	0	0	0	0	0	0	0	0	0	0	0	4	0	0	0	0	0	0	0		0.0869565	0.0869565
07:30:00	0	0	0	0	0	13	0	23	0	20	7	0	0	0	0	0	0	0	0	0	0	0	0	0	0	0	0	0	0	0	0	0	4	0	0	0	0	0	18	0	0	0	0	0	0	0		1.84783	0.801549
08:00:00	0	0	0	0	0	23	0	0	0	3	15	0	0	0	0	0	0	0	0	0	0	0	0	0	0	0	0	0	0	0	0	0	0	0	0	0	0	0	1	0	0	0	0	0	0	0		0.913043	0.592078
[truncated: 52 more columns]

## Sheet: Fig 1 J
ND_FeedingSummary
DFM1#	Chamber	PI	EventPI	LicksA	LicksB	EventsA	EventsB	MeanDurationA	MedDurationA	MeanDurationB	MedDurationB	MeanTimeBtwA	MedTimeBtwA	MeanTimeBtwB	MedTimeBtwB	MeanIntA	MedianIntA	MeanIntB	MedianIntB	StartMin	EndMin	BaselineWindowMin	SignalThreshold	FeedingThreshold	FeedingMinimum	TastingLow	TastingHigh	UseAdaptiveThresh	AdapThreshMin	AdapThreshWinMin	AdapThreshSelQuant	FeedingMinEvents	SamplesSec	ChamberSize	Ch1	Ch2	Ch3	Ch4	Ch5	Ch6	Ch7	Ch8	Ch9	Ch10	Ch11	Ch12
1	1	1	1	936		61		3.06885	2.4			1390.47	750.9	86396.4	86396.4	171.032	173	0	0	0	0	3	50	120	40	10	40	0	8	2	0.9	5	5	2	1	3	5	7	9	11	2	4	6	8	10	12
1	2	-0.130939	-0.214286	375	488	22	34	3.40909	3.1	2.87059	2.6	3753.1	889	2465.68	339.2	94.3893	96	117.402	118	0	0	3	50	120	40	10	40	0	8	2	0.9	5	5	2	1	3	5	7	9	11	2	4	6	8	10	12
1	3	-0.0852018	-0.218391	612	726	34	53	3.6	3	2.73962	2.4	2464.97	1007.4	1597.24	482.4	101.843	107	131.355	136	0	0	3	50	120	40	10	40	0	8	2	0.9	5	5	2	1	3	5	7	9	11	2	4	6	8	10	12
1	4	-1	-1		315		25			2.52	2	86396.4	86396.4	3320.52	612.3	0	0	125.159	125	0	0	3	50	120	40	10	40	0	8	2	0.9	5	5	2	1	3	5	7	9	11	2	4	6	8	10	12
1	5	-0.0241102	-0.0526316	425	446	27	30	3.14815	2.2	2.97333	2.3	3082.55	796.9	2784.1	859.2	220.224	229	116.422	113	0	0	3	50	120	40	10	40	0	8	2	0.9	5	5	2	1	3	5	7	9	11	2	4	6	8	10	12
1	6	-0.097561	-0.178571	370	450	23	33	3.21739	2.8	2.72727	2.4	3596.77	1050.5	2538.42	563	129.419	127.5	182.751	185.5	0	0	3	50	120	40	10	40	0	8	2	0.9	5	5	2	1	3	5	7	9	11	2	4	6	8	10	12
DFM2#	Chamber	PI	EventPI	LicksA	LicksB	EventsA	EventsB	MeanDurationA	MedDurationA	MeanDurationB	MedDurationB	MeanTimeBtwA	MedTimeBtwA	MeanTimeBtwB	MedTimeBtwB	MeanIntA	MedianIntA	MeanIntB	MedianIntB	StartMin	EndMin	BaselineWindowMin	SignalThreshold	FeedingThreshold	FeedingMinimum	TastingLow	TastingHigh	UseAdaptiveThresh	AdapThreshMin	AdapThreshWinMin	AdapThreshSelQuant	FeedingMinEvents	SamplesSec	ChamberSize	Ch1	Ch2	Ch3	Ch4	Ch5	Ch6	Ch7	Ch8	Ch9	Ch10	Ch11	Ch12
2	1	-0.324454	-0.341463	634	1243	27	55	4.6963	3.2	4.52	3.4	3081.06	1177.5	1538.35	355.8	161.713	148.5	160.951	153	0	0	3	50	120	40	10	40	0	8	2	0.9	5	5	2	1	3	5	7	9	11	2	4	6	8	10	12
2	2	-0.836547	-0.622642	89	1000	10	43	1.78	1.2	4.65116	3.2	7852.6	1280.2	1959.01	695.6	114.191	115	120.798	118	0	0	3	50	120	40	10	40	0	8	2	0.9	5	5	2	1	3	5	7	9	11	2	4	6	8	10	12
2	3	-0.551724	-0.311475	234	810	21	40	2.22857	1.6	4.05	3.4	3924.98	737.7	2103.28	971.2	153.906	143	107.949	109	0	0	3	50	120	40	10	40	0	8	2	0.9	5	5	2	1	3	5	7	9	11	2	4	6	8	10	12
2	4	-0.143842	-0.172414	497	664	24	34	4.14167	3.4	3.90588	3.5	3451.88	1526.8	2464.67	527.8	178.324	125	153.22	134	0	0	3	50	120	40	10	40	0	8	2	0.9	5	5	2	1	3	5	7	9	11	2	4	6	8	10	12
2	5	-1	-1		1104		42			5.25714	4.6	86396.4	86396.4	2004.08	1009.4	0	0	155.869	149	0	0	3	50	120	40	10	40	0	8	2	0.9	5	5	2	1	3	5	7	9	11	2	4	6	8	10	12
2	6	0.15157	0.174603	642	473	37	26	3.47027	3.2	3.63846	2.8	2270.21	1545.9	3196.36	631	204.998	182.5	193.391	191	0	0	3	50	120	40	10	40	0	8	2	0.9	5	5	2	1	3	5	7	9	11	2	4	6	8	10	12
DFM8#	Chamber	PI	EventPI	LicksA	LicksB	EventsA	EventsB	MeanDurationA	MedDurationA	MeanDurationB	MedDurationB	MeanTimeBtwA	MedTimeBtwA	MeanTimeBtwB	MedTimeBtwB	MeanIntA	MedianIntA	MeanIntB	MedianIntB	StartMin	EndMin	BaselineWindowMin	SignalThreshold	FeedingThreshold	FeedingMinimum	TastingLow	TastingHigh	UseAdaptiveThresh	AdapThreshMin	AdapThreshWinMin	AdapThreshSelQuant	FeedingMinEvents	SamplesSec	ChamberSize	Ch1	Ch2	Ch3	Ch4	Ch5	Ch6	Ch7	Ch8	Ch9	Ch10	Ch11	Ch12
8	1	0.206522	0.175	666	438	47	33	2.83404	2.4	2.65455	2.6	1797.15	691	2538.49	408	112.986	116	105.121	102	0	0	3	50	120	40	10	40	0	8	2	0.9	5	5	2	1	3	5	7	9	11	2	4	6	8	10	12
8	2	-1	-1		285		25			2.28	2.2	86396.4	86396.4	3320.75	1006	0	0	127.039	134	0	0	3	50	120	40	10	40	0	8	2	0.9	5	5	2	1	3	5	7	9	11	2	4	6	8	10	12
8	3	-1	-1		341		20			3.41	3.2	86396.4	86396.4	4110.87	1537.4	0	0	93.3988	95	0	0	3	50	120	40	10	40	0	8	2	0.9	5	5	2	1	3	5	7	9	11	2	4	6	8	10	12
8	4	-0.973641	-0.944444		599		35			3.42286	3	43197.4	43197.4	2396.57	1383.8	112.5	105	108.361	114	0	0	3	50	120	40	10	40	0	8	2	0.9	5	5	2	1	3	5	7	9	11	2	4	6	8	10	12
8	5	-1	-1									86396.4	86396.4	10796.7	6822.3	0	0	96.2389	98	0	0	3	50	120	40	10	40	0	8	2	0.9	5	5	2	1	3	5	7	9	11	2	4	6	8	10	12
8	6	1	1	716		67		2.13731	1.8			1268.43	517.6	86396.4	86396.4	117.985	113	0	0	0	0	3	50	120	40	10	40	0	8	2	0.9	5	5	2	1	3	5	7	9	11	2	4	6	8	10	12
DFM16#	Chamber	PI	EventPI	LicksA	LicksB	EventsA	EventsB	MeanDurationA	MedDurationA	MeanDurationB	MedDurationB	MeanTimeBtwA	MedTimeBtwA	MeanTimeBtwB	MedTimeBtwB	MeanIntA	MedianIntA	MeanIntB	MedianIntB	StartMin	EndMin	BaselineWindowMin	SignalThreshold	FeedingThreshold	FeedingMinimum	TastingLow	TastingHigh	UseAdaptiveThresh	AdapThreshMin	AdapThreshWinMin	AdapThreshSelQuant	FeedingMinEvents	SamplesSec	ChamberSize	Ch1	Ch2	Ch3	Ch4	Ch5	Ch6	Ch7	Ch8	Ch9	Ch10	Ch11	Ch12
16	1	0.116759	0.230769	703	556	48	30	2.92917	2.1	3.70667	1.7	1760.32	677.8	2783.39	880.6	130.326	125	216.333	211.5	0	0	3	50	120	40	10	40	0	8	2	0.9	5	5	2	1	3	5	7	9	11	2	4	6	8	10	12
16	2	0.251272	0.392405	615	368	55	24	2.23636	2	3.06667	1.6	1540.6	818.6	3452.91	1173.6	124.567	112	201.595	197	0	0	3	50	120	40	10	40	0	8	2	0.9	5	5	2	1	3	5	7	9	11	2	4	6	8	10	12
16	3	-1	-1		829		38			4.36316	3.9	86396.4	86396.4	2211.04	431.2	0	0	184.75	182	0	0	3	50	120	40	10	40	0	8	2	0.9	5	5	2	1	3	5	7	9	11	2	4	6	8	10	12
16	4	-0.0267983	-0.234043	690	728	36	58	3.83333	2.7	2.51034	1.8	2331.31	832.8	1461.88	557.8	320.343	346	218.082	215	0	0	3	50	120	40	10	40	0	8	2	0.9	5	5	2	1	3	5	7	9	11	2	4	6	8	10	12
16	5	-0.205384	-0.347368	797	1209	31	64	5.14194	3	3.77813	3.4	2694.91	620.7	1325.46	976.8	282.827	303	242.687	241	0	0	3	50	120	40	10	40	0	8	2	0.9	5	5	2	1	3	5	7	9	11	2	4	6	8	10	12
16	6	0.497164	0.272727	396	133	28	16	2.82857	1.7	1.6625	1.4	2976.46	402	5080.58	2770.2	200.136	200	174.436	152	0	0	3	50	120	40	10	40	0	8	2	0.9	5	5	2	1	3	5	7	9	11	2	4	6	8	10	12
HFD_FeedingSummary
DFM1#	Chamber	PI	EventPI	LicksA	LicksB	EventsA	EventsB	MeanDurationA	MedDurationA	MeanDurationB	MedDurationB	MeanTimeBtwA	MedTimeBtwA	MeanTimeBtwB	MedTimeBtwB	MeanIntA	MedianIntA	MeanIntB	MedianIntB	StartMin	EndMin	BaselineWindowMin	SignalThreshold	FeedingThreshold	FeedingMinimum	TastingLow	TastingHigh	UseAdaptiveThresh	AdapThreshMin	AdapThreshWinMin	AdapThreshSelQuant	FeedingMinEvents	SamplesSec	ChamberSize	Ch1	Ch2	Ch3	Ch4	Ch5	Ch6	Ch7	Ch8	Ch9	Ch10	Ch11	Ch12
1	1	-0.213864	0.148515	998	1541	58	43	3.44138	3	7.16744	5.4	1460.96	780.8	1956.55	1052.8	167.691	161	100.227	92	0	0	3	50	120	40	10	40	0	8	2	0.9	5	5	2	1	3	5	7	9	11	2	4	6	8	10	12
1	2	0.0809281	0.0689655	955	812	62	54	3.08065	2.3	3.00741	2.8	1368.34	1126	1567.89	1073.6	224.392	187	122.993	113	0	0	3	50	120	40	10	40	0	8	2	0.9	5	5	2	1	3	5	7	9	11	2	4	6	8	10	12
1	3	-0.146259	-0.289474	502	674	27	49	3.71852	3.4	2.75102	2.4	3082	1334.4	1725.23	888.8	236.287	226	132.463	127	0	0	3	50	120	40	10	40	0	8	2	0.9	5	5	2	1	3	5	7	9	11	2	4	6	8	10	12
1	4	0.0964778	0.0952381	358	295	23	19	3.11304	2.8	3.10526	2.4	3596.87	1638.5	4316.87	1509.7	117.145	111.5	103.793	98	0	0	3	50	120	40	10	40	0	8	2	0.9	5	5	2	1	3	5	7	9	11	2	4	6	8	10	12
1	5	0.519392	0.606838	999	316	94	23	2.12553	2	2.74783	2.6	907.333	429	3597.22	2080.2	126.511	123	149.396	142	0	0	3	50	120	40	10	40	0	8	2	0.9	5	5	2	1	3	5	7	9	11	2	4	6	8	10	12
1	6	-0.660305	-0.44	178	870	21	54	1.69524	1.6	3.22222	2.8	3925.49	1970.9	1567.68	558.2	115.713	110.5	114.916	103	0	0	3	50	120	40	10	40	0	8	2	0.9	5	5	2	1	3	5	7	9	11	2	4	6	8	10	12
DFM2#	Chamber	PI	EventPI	LicksA	LicksB	EventsA	EventsB	MeanDurationA	MedDurationA	MeanDurationB	MedDurationB	MeanTimeBtwA	MedTimeBtwA	MeanTimeBtwB	MedTimeBtwB	MeanIntA	MedianIntA	MeanIntB	MedianIntB	StartMin	EndMin	BaselineWindowMin	SignalThreshold	FeedingThreshold	FeedingMinimum	TastingLow	TastingHigh	UseAdaptiveThresh	AdapThreshMin	AdapThreshWinMin	AdapThreshSelQuant	FeedingMinEvents	SamplesSec	ChamberSize	Ch1	Ch2	Ch3	Ch4	Ch5	Ch6	Ch7	Ch8	Ch9	Ch10	Ch11	Ch12
2	1	-0.183377	-0.032967	786	1139	44	47	3.57273	3.3	4.84681	4.6	1916.43	1259.2	1795.18	1207.2	229.545	188	114.179	110	0	0	3	50	120	40	10	40	0	8	2	0.9	5	5	2	1	3	5	7	9	11	2	4	6	8	10	12
2	2	-0.633058	-0.414634	111	494	12	29	1.85	1.2	3.4069	2.4	6644.17	2637.6	2876.59	1206.8	219.919	188	155.455	143.5	0	0	3	50	120	40	10	40	0	8	2	0.9	5	5	2	1	3	5	7	9	11	2	4	6	8	10	12
2	3	-0.0567595	0.0877193	457	512	31	26	2.94839	1.6	3.93846	3.3	2697.03	1795.3	3196.07	1597	280.63	238	230.043	207	0	0	3	50	120	40	10	40	0	8	2	0.9	5	5	2	1	3	5	7	9	11	2	4	6	8	10	12
2	4	-0.191293	-0.0352941	613	903	41	44	2.99024	2.2	4.10455	3.7	2054.14	996.4	1915.91	995.2	273.142	241	165.752	165	0	0	3	50	120	40	10	40	0	8	2	0.9	5	5	2	1	3	5	7	9	11	2	4	6	8	10	12
2	5	0.392569	0.444444	862	376	52	20	3.31538	2.7	3.76	3	1626.87	840.8	4110.53	1645.6	333.434	316	181.931	158.5	0	0	3	50	120	40	10	40	0	8	2	0.9	5	5	2	1	3	5	7	9	11	2	4	6	8	10	12
2	6	-0.244375	-0.357143	487	802	27	57	3.60741	2.6	2.81404	2.6	3082.11	2493.6	1486.83	779.3	205.967	199	177.934	156	0	0	3	50	120	40	10	40	0	8	2	0.9	5	5	2	1	3	5	7	9	11	2	4	6	8	10	12
DFM16#	Chamber	PI	EventPI	LicksA	LicksB	EventsA	EventsB	MeanDurationA	MedDurationA	MeanDurationB	MedDurationB	MeanTimeBtwA	MedTimeBtwA	MeanTimeBtwB	MedTimeBtwB	MeanIntA	MedianIntA	MeanIntB	MedianIntB	StartMin	EndMin	BaselineWindowMin	SignalThreshold	FeedingThreshold	FeedingMinimum	TastingLow	TastingHigh	UseAdaptiveThresh	AdapThreshMin	AdapThreshWinMin	AdapThreshSelQuant	FeedingMinEvents	SamplesSec	ChamberSize	Ch1	Ch2	Ch3	Ch4	Ch5	Ch6	Ch7	Ch8	Ch9	Ch10	Ch11	Ch12
16	1	1	1	763		59		2.58644	2.2			1437.4	883.5	86396.4	86396.4	139.545	135	0	0	0	0	3	50	120	40	10	40	0	8	2	0.9	5	5	2	1	3	5	7	9	11	2	4	6	8	10	12
16	2	-0.277072	-0.238095	484	855	40	65	2.42	2.2	2.63077	2.2	2104.87	1304.2	1306.45	352.2	189.461	159.5	140.971	126	0	0	3	50	120	40	10	40	0	8	2	0.9	5	5	2	1	3	5	7	9	11	2	4	6	8	10	12
16	3	0.055325	-0.047619	763	683	40	44	3.815	3.8	3.10455	2.9	2103.51	1145.4	1916.88	1319.2	196.958	189	161.599	163	0	0	3	50	120	40	10	40	0	8	2	0.9	5	5	2	1	3	5	7	9	11	2	4	6	8	10	12
16	4	-0.362651	-0.472527	529	1131	24	67	4.40833	4.1	3.37612	3.2	3451.62	1426	1267.21	916.8	219.864	217	139.309	130	0	0	3	50	120	40	10	40	0	8	2	0.9	5	5	2	1	3	5	7	9	11	2	4	6	8	10	12
16	5	-0.0181452	-0.0491803	487	505	29	32	3.35862	2.4	3.15625	2.7	2876.63	2283.1	2615.01	988.4	211.437	201	152.234	128	0	0	3	50	120	40	10	40	0	8	2	0.9	5	5	2	1	3	5	7	9	11	2	4	6	8	10	12
16	6	-0.432432	-0.442308	441	1113	29	75	3.04138	2.6	2.968	2.8	2876.94	2005.7	1133.87	708.3	138.59	129	165.876	147	0	0	3	50	120	40	10	40	0	8	2	0.9	5	5	2	1	3	5	7	9	11	2	4	6	8	10	12
DFM18#	Chamber	PI	EventPI	LicksA	LicksB	EventsA	EventsB	MeanDurationA	MedDurationA	MeanDurationB	MedDurationB	MeanTimeBtwA	MedTimeBtwA	MeanTimeBtwB	MedTimeBtwB	MeanIntA	MedianIntA	MeanIntB	MedianIntB	StartMin	EndMin	BaselineWindowMin	SignalThreshold	FeedingThreshold	FeedingMinimum	TastingLow	TastingHigh	UseAdaptiveThresh	AdapThreshMin	AdapThreshWinMin	AdapThreshSelQuant	FeedingMinEvents	SamplesSec	ChamberSize	Ch1	Ch2	Ch3	Ch4	Ch5	Ch6	Ch7	Ch8	Ch9	Ch10	Ch11	Ch12
18	1	-0.266282	-0.0886076	445	768	36	43	2.47222	2.2	3.57209	3.4	2332.63	832.2	1960.06	1114.1	151.454	141	149.591	142	0	0	3	50	120	40	10	40	0	8	2	0.9	5	5	2	1	3	5	7	9	11	2	4	6	8	10	12
18	2	0.519558	0.490909	1787	565	123	42	2.90569	2.6	2.69048	2.3	693.863	508.4	2006.59	934.6	113.879	104	133.094	127	0	0	3	50	120	40	10	40	0	8	2	0.9	5	5	2	1	3	5	7	9	11	2	4	6	8	10	12
18	3	0.202759	0.267176	872	578	83	48	2.1012	1.8	2.40833	2.2	1026.45	570	1760.83	1063.6	154.167	138	123.289	119	0	0	3	50	120	40	10	40	0	8	2	0.9	5	5	2	1	3	5	7	9	11	2	4	6	8	10	12
18	4	0.0900141	-0.00813008	775	647	61	62	2.54098	2.2	2.0871	1.8	1390.99	957.2	1369.32	616.4	134.497	127	150.918	138	0	0	3	50	120	40	10	40	0	8	2	0.9	5	5	2	1	3	5	7	9	11	2	4	6	8	10	12
18	5	-0.00927909	-0.0166667	694	707	59	61	2.35254	2.2	2.31803	2	1437.63	747.8	1391.21	803.4	175.859	160	123.457	120	0	0	3	50	120	40	10	40	0	8	2	0.9	5	5	2	1	3	5	7	9	11	2	4	6	8	10	12
18	6	0.219929	0.312	857	548	82	43	2.09024	2	2.54884	2.2	1038.86	561.2	1961.06	1072.6	177.323	177	163.911	149	0	0	3	50	120	40	10	40	0	8	2	0.9	5	5	2	1	3	5	7	9	11	2	4	6	8	10	12

## Sheet: Fig 1 K
		1	2	3	4	5	6	7	8	9	10	11	12
A	Content	Unkn	Unkn	Unkn	Unkn	Unkn	Unkn	Unkn	Unkn	Unkn	Unkn	Unkn	Unkn
A	Sample
A	Cq
A
B	Content	Unkn	Unkn	Unkn	Unkn	Unkn	Unkn	Unkn	Unkn	Unkn	Unkn	Unkn	Unkn
B	Sample
B	Cq				26.4722	25.235	23.6598	21.7754	18.5917	15.7665	14.4674
B
C	Content	Unkn	Unkn	Unkn	Unkn	Unkn	Unkn	Unkn	Unkn	Unkn	Unkn	Unkn	Unkn
C	Sample
C	Cq	28.1604	29.0057	28.0712	23.3697	26.9685	28.2797	28.2681	26.9659	29.2408	28.7661	21.764	27.6175
C
D	Content	Unkn	Unkn	Unkn	Unkn	Unkn	Unkn	Unkn	Unkn	Unkn	Unkn	Unkn	Unkn
D	Sample
D	Cq	28.3963	29.5546	28.0344	24.0884	27.047	28.3561	28.6378	27.3594	29.2388	28.7321	22.2061	28.0385
D
E	Content	Unkn	Unkn	Unkn	Unkn	Unkn	Unkn	Unkn	Unkn	Unkn	Unkn	Unkn	Unkn
E	Sample
E	Cq	25.504	28.2868	30.4338	27.7408	27.6133	26.9814	27.1704	26.0309	23.6935	27.7832	27.1144	27.1923
E
F	Content	Unkn	Unkn	Unkn	Unkn	Unkn	Unkn	Unkn	Unkn	Unkn	Unkn	Unkn	Unkn
F	Sample
F	Cq	25.4161	28.3687	31.0732	28.5281	27.5747	28.3884	28.0715	26.1984	23.5371	28.4289	27.3141	27.6362
F
G	Content	Unkn	Unkn	Unkn	Unkn	Unkn	Unkn	Unkn	Unkn	Unkn	Unkn	Unkn	Unkn
G	Sample
G	Cq	30.2645	28.1225	29.5489	24.8304
G
H	Content	Unkn	Unkn	Unkn	Unkn	Unkn	Unkn	Unkn	Unkn	Unkn	Unkn	Unkn	Unkn
H	Sample
H	Cq	30.5755	28.3413	29.2223	25.0559
H

## Sheet: Fig 1 Q
No.	ND-ST	HFD-ST
1	0.309729	0.232902
2	0.305758	0.190388
3	0.24818	0.358595
4	0.138981	0.155748
5	0.184646	0.116811
6	0.254136	0.051916
7	0.319656	0.315204
8	0.152879	0.470952
9	0.337525	0.127936
10	0.134935	0.198393
11	0.147874	0.150185
12	0.099815	0.083436
13	0.040665	0.202101
14	0.299445	0.153894
15	0.123845	0.287392
16	0.090573	0.300371
17	0.075786	0.027963
18	0.085028	0.275632
19	0.253235	0.199734
20	0.170055	0.363515
21	0.279113	0.497337
22	0.07733	0.315579
23	0.079313	0.143808
24	0.089227	0.411451
25	0.285525	0.168605
26	0.483807	0.284884
27	0.226041	0.151163
28	0.45803	0.120155
29	0.079893	0.21124

## Sheet: Fig 1 S1 A (WT strain 1)
FED	M10-7.16																M12-7.16															M17-7.16																M16-7.17
20:00:00	57	26	33	44	39	50	29	51	46	50	27	71	46	53	34	33	61	43	40	45	23	27	60	1	48	50	38	62	42	39	40	48	67	46	38	53	54	61	32	40	31	25	2	60	33	51	29	53	46
20:30:00	70	47	50	40	42	85	54	78	51	64	37	90	46	76	68	45	75	38	44	48	38	54	78	0	50	56	59	74	52	62	53	51	108	64	46	52	57	48	58	61	49	36	33	65	57	34	66	55	51
21:00:00	21	16	17	26	0	15	7	11	4	16	1	19	7	13	17	11	0	9	11	0	5	8	17	0	12	5	19	9	21	1	6	18	21	9	22	12	13	4	0	12	0	0	18	7	2	40	2	48	48
21:30:00	0	0	0	0	0	9	0	0	0	4	0	1	0	0	2	0	0	4	0	1	0	0	4	0	1	0	0	1	0	0	0	5	0	0	21	0	0	0	0	0	0	0	0	0	0	1	0	4	20
22:00:00	0	0	0	0	0	5	0	0	0	0	8	0	0	0	0	0	0	12	0	11	0	0	0	0	3	0	0	0	0	0	0	6	0	0	0	0	0	0	0	0	0	0	0	0	0	0	0	2	2
22:30:00	0	0	0	0	0	2	0	0	0	0	0	0	0	0	0	0	1	2	0	1	0	0	0	0	6	0	0	0	0	0	0	13	0	0	0	0	0	0	0	0	0	0	0	0	0	0	0	0	0
23:00:00	0	0	0	0	0	0	0	0	0	0	0	0	0	0	0	0	1	0	0	0	0	0	9	0	0	0	4	0	0	0	0	0	0	0	0	0	0	0	0	0	0	0	0	0	0	6	0	0	0
23:30:00	0	15	0	0	0	0	0	1	0	0	0	0	0	0	0	0	5	0	0	0	0	0	0	0	0	0	0	0	0	0	0	0	0	0	0	5	0	0	0	0	0	0	0	0	0	3	0	0	0
00:00:00	0	5	0	0	0	0	0	2	0	0	0	0	0	0	0	0	12	0	0	0	0	0	0	0	0	0	0	0	0	0	8	0	0	0	0	2	0	0	0	0	0	0	0	0	0	10	0	0	0
00:30:00	0	1	0	0	0	0	0	4	0	0	0	0	0	0	0	0	0	0	0	0	0	0	0	0	0	0	0	0	6	0	3	0	0	0	0	0	0	0	0	0	0	0	0	0	0	15	0	0	0
01:00:00	0	0	0	0	0	0	0	1	0	0	0	4	0	0	0	0	0	0	0	0	0	0	0	0	4	1	0	0	0	0	2	0	0	0	0	0	0	0	0	0	0	0	0	0	0	0	0	0	0
01:30:00	0	7	0	0	0	0	0	0	0	0	0	1	0	0	0	0	0	0	0	13	0	0	0	1	0	4	0	0	0	0	0	0	0	0	0	0	0	0	0	0	0	0	0	0	0	0	0	0	0
02:00:00	0	19	0	0	0	0	0	0	0	0	0	0	0	0	0	0	0	0	0	12	0	0	0	7	0	0	3	3	0	0	0	0	0	0	0	0	0	0	0	0	0	0	0	0	0	0	0	0	0
02:30:00	0	0	0	0	0	0	0	0	0	0	0	0	0	0	0	0	0	0	0	6	0	0	0	0	0	0	0	23	14	0	0	0	0	0	0	0	0	0	0	0	0	0	0	0	0	0	0	0	0
03:00:00	0	0	0	0	0	0	0	0	0	0	0	0	0	0	0	0	0	0	0	7	0	0	0	0	0	0	0	5	2	0	0	0	0	0	0	0	0	0	0	0	0	0	0	0	0	0	0	0	0
03:30:00	0	0	0	0	0	0	26	0	0	0	0	0	0	0	0	0	0	0	0	4	0	6	0	0	9	0	0	2	0	0	0	0	0	0	0	0	0	0	0	0	0	0	0	0	0	0	0	0	0
04:00:00	0	0	0	0	0	0	0	0	0	0	0	0	0	0	0	0	0	0	0	8	0	0	0	0	2	0	0	9	0	0	0	0	0	0	0	0	0	0	0	12	0	0	0	0	0	0	0	0	0
04:30:00	0	0	0	0	0	0	0	0	0	0	0	0	0	0	0	0	0	0	0	1	0	0	0	0	17	0	2	10	10	0	0	0	0	0	0	0	0	0	0	0	0	0	0	0	0	0	4	0	0
05:00:00	2	0	0	0	0	0	0	0	0	0	0	0	0	0	0	0	0	0	0	4	0	0	0	0	2	0	0	4	3	0	0	0	0	0	0	0	0	0	0	0	0	0	0	0	0	0	4	0	0
05:30:00	25	0	0	15	0	0	0	0	12	0	0	5	0	38	0	0	0	0	0	29	0	0	0	0	0	7	0	73	25	9	0	8	0	8	0	19	8	0	0	9	0	12	2	0	0	0	30	0	0
06:00:00	17	0	7	7	0	21	6	18	26	4	0	17	32	25	0	0	27	52	4	16	27	17	16	0	20	6	4	20	9	10	3	12	41	31	2	21	39	19	0	17	44	2	7	27	0	0	30	0	6
06:30:00	42	0	7	0	0	30	16	0	0	25	0	18	62	28	0	0	4	19	8	11	0	17	27	0	15	41	17	15	6	4	3	0	29	42	0	11	19	8	35	0	0	0	15	19	0	28	17	0	34
07:00:00	34	0	4	0	0	25	29	0	0	4	0	12	17	28	0	6	2	0	10	7	16	56	11	0	12	42	6	20	4	13	9	4	22	30	0	11	25	6	12	2	33	0	6	8	0	30	0	3	22
07:30:00	30	0	25	19	0	20	26	2	3	12	0	50	0	13	2	0	4	0	13	26	18	5	17	0	7	34	10	25	14	11	36	0	8	23	0	0	15	5	12	0	3	0	0	6	0	2	10	26	20
08:00:00	18	0	1	19	3	3	0	15	16	12	1	19	5	33	3	2	0	6	11	6	23	20	12	3	31	18	7	17	19	13	14	11	31	11	1	11	4	7	0	2	0	20	4	11	0	28	47	8	17
08:30:00	24	0	4	63	9	0	25	0	18	3	0	21	2	16	26	7	0	7	12	1	21	21	12	0	37	16	0	8	7	13	13	34	4	0	0	12	0	0	0	0	78	0	1	0	0	37	9	4	14
09:00:00	1	1	4	27	8	0	5	0	12	10	0	17	9	3	15	0	3	3	13	19	14	6	26	0	22	12	10	6	11	9	0	0	2	16	0	26	14	6	0	8	34	0	19	0	16	16	10	2	51
09:30:00	20	0	30	3	20	31	21	24	21	26	0	22	33	14	40	6	31	16	8	31	27	24	22	0	21	20	3	25	15	14	19	0	14	31	0	20	18	29	26	16	23	1	15	23	29	28	11	10	17
10:00:00	4	0	0	0	0	7	2	0	3	0	0	13	0	0	8	1	0	0	5	0	5	0	22	0	16	5	13	6	7	8	7	0	1	8	0	2	19	1	0	0	0	0	2	0	3	5	0	11	4
10:30:00	9	7	1	0	8	19	6	0	11	0	0	12	0	7	16	0	5	0	7	37	14	6	30	0	17	13	10	14	2	26	6	0	1	25	0	9	7	2	0	0	10	5	0	13	61	8	14	4	11
11:00:00	1	0	3	0	0	0	2	0	9	0	0	11	0	9	2	0	0	3	3	1	4	3	12	0	22	1	13	13	6	0	1	0	2	22	0	8	0	0	0	0	0	0	0	0	0	0	0	0	3
11:30:00	0	2	19	0	1	21	14	11	15	0	0	15	16	11	14	1	14	17	5	15	34	27	30	0	16	20	23	12	9	4	5	0	10	14	0	12	6	28	10	8	17	6	7	12	16	10	31	1	0
12:00:00	14	0	6	0	3	11	4	1	20	16	0	15	7	0	7	0	28	15	3	11	11	7	17	0	23	0	2	16	7	12	12	0	0	15	0	16	1	5	6	2	9	3	24	5	0	9	2	0	0
12:30:00	0	0	0	3	0	2	0	0	0	0	0	8	0	3	0	0	0	0	1	3	3	1	20	0	25	3	0	12	2	0	1	0	0	19	0	1	0	1	0	0	0	0	2	1	0	0	0	0	0
13:00:00	0	0	0	16	3	7	4	0	1	0	0	14	0	0	9	0	0	0	0	10	2	0	29	0	17	0	0	3	6	1	0	3	0	9	0	1	1	0	0	0	0	0	0	2	1	1	0	0	1
13:30:00	0	0	0	3	30	13	6	0	7	0	0	11	0	0	14	0	0	0	0	0	12	0	20	0	24	0	4	9	2	1	0	0	0	8	0	8	7	0	0	3	33	0	3	1	5	12	8	0	0
14:00:00	2	0	0	14	1	0	0	0	0	0	0	4	0	2	9	0	0	0	3	8	4	0	10	0	13	0	0	1	6	0	0	0	0	3	0	2	0	0	0	0	0	0	0	1	0	0	0	5	0
14:30:00	21	0	12	24	15	0	14	1	14	16	0	15	9	30	32	0	23	12	0	23	22	16	23	12	16	15	0	14	5	12	1	0	2	3	0	39	4	22	14	11	18	0	24	14	13	0	15	1	0
15:00:00	20	0	1	7	2	2	15	1	7	0	0	5	7	14	3	0	6	8	0	11	23	3	0	0	24	4	0	14	21	28	0	0	0	1	0	1	19	2	4	4	10	0	3	7	4	2	6	0	0
15:30:00	0	0	0	0	1	4	0	4	6	0	0	9	0	0	0	0	0	0	0	2	9	0	0	0	13	0	6	9	10	0	0	0	0	11	0	0	4	9	0	3	7	0	0	7	0	0	10	0	0
16:00:00	0	0	0	12	2	0	0	0	0	0	0	15	0	0	0	0	0	1	0	0	0	0	0	0	20	0	10	8	2	0	0	0	0	0	0	0	0	0	1	0	0	0	0	0	0	0	0	1	0
16:30:00	0	0	0	3	1	0	0	0	2	0	0	5	1	0	0	0	10	0	0	5	8	0	8	5	13	0	0	8	1	0	0	0	0	0	0	3	1	0	0	0	33	0	0	0	24	0	0	2	11
17:00:00	0	0	0	0	16	0	7	0	23	0	0	4	0	9	12	0	5	1	0	0	22	9	6	32	4	10	0	4	12	15	0	0	0	3	0	6	2	18	13	24	33	0	0	16	23	12	12	7	0
17:30:00	11	0	20	32	24	0	28	15	10	12	1	13	11	0	4	0	14	5	0	22	11	14	22	34	18	39	8	30	25	36	0	0	27	10	0	10	9	21	9	1	8	19	20	11	13	1	6	4	0
18:00:00	6	0	3	8	4	0	3	1	0	0	0	9	3	7	1	0	9	0	0	1	3	0	0	10	12	6	0	7	7	0	0	0	29	0	0	3	2	5	9	5	4	9	11	2	8	1	2	7	0
18:30:00	6	0	0	1	3	2	1	0	0	0	1	13	0	3	1	26	6	6	0	0	15	0	9	0	7	2	1	13	4	1	0	0	5	4	0	2	2	1	0	0	1	5	3	3	9	16	6	4	0
19:00:00	9	0	1	0	10	0	1	0	1	0	0	15	1	0	0	31	0	1	0	1	8	1	2	37	13	2	2	11	6	1	0	0	1	3	0	3	5	1	0	4	0	7	8	3	0	0	0	0	0
19:30:00	27	0	0	0	13	0	1	0	0	0	0	26	1	2	5	0	0	7	0	7	14	0	23	10	14	4	1	24	12	1	0	0	11	16	1	6	27	14	1	7	0	21	14	9	19	12	22	11	6
20:00:00	80	48	52	42	70	96	57	58	46	72	51	71	54	74	74	34	102	57	45	65	55	60	90	40	59	99	86	92	58	56	34	42	85	88	45	83	85	78	76	85	64	67	65	67	67	60	60	56	61
20:30:00	62	67	59	48	51	84	62	75	45	65	54	70	60	80	113	51	75	48	62	73	56	77	99	62	66	93	78	102	38	55	65	61	93	86	61	89	115	68	58	70	44	67	54	58	69	69	50	86	69
21:00:00	28	35	30	21	17	41	36	53	22	16	15	42	16	58	53	35	22	26	43	24	28	84	80	27	30	41	46	37	17	30	22	33	55	80	28	37	69	18	14	17	11	20	57	22	32	32	17	27	35
21:30:00	0	36	0	0	0	1	3	29	0	0	0	5	0	15	9	3	0	14	12	0	2	27	24	0	12	1	14	2	8	5	0	0	64	19	8	5	16	0	0	0	0	0	7	0	0	1	0	0	0
22:00:00	0	4	0	0	0	0	0	0	0	0	0	0	0	0	0	0	0	0	2	0	0	15	2	0	1	0	2	4	0	0	0	0	0	8	0	1	0	0	0	0	0	0	1	0	0	0	0	0	0
22:30:00	0	0	0	0	0	0	0	0	0	0	0	0	0	0	0	0	0	0	0	0	0	0	0	0	0	0	0	0	0	0	0	0	0	0	0	23	0	0	0	0	0	0	16	0	0	0	0	0	0
23:00:00	0	0	0	0	0	0	0	0	0	0	0	0	0	0	0	0	0	0	0	0	0	0	0	0	0	0	0	0	0	0	0	0	0	0	0	3	0	0	0	0	0	0	0	0	0	0	0	0	0
23:30:00	0	0	0	0	0	0	0	0	0	0	0	0	0	0	0	0	0	0	0	0	0	0	0	0	0	0	0	0	0	0	0	0	0	0	0	0	11	0	0	0	0	0	0	0	0	0	0	0	0
00:00:00	0	0	0	0	0	0	0	0	0	0	0	0	0	0	0	0	0	0	0	0	0	0	0	0	0	0	0	0	0	0	0	0	0	0	3	0	5	0	0	0	0	0	0	0	0	0	0	0	0
00:30:00	0	0	0	0	0	0	0	0	0	0	0	0	0	0	0	31	0	0	0	0	0	0	0	0	0	0	0	0	0	0	0	0	0	0	0	14	1	0	0	0	0	0	0	0	0	0	0	0	0
01:00:00	0	0	0	0	0	0	0	0	0	0	0	0	0	0	0	0	0	0	0	0	0	0	0	0	0	0	0	0	0	0	0	0	0	0	0	2	1	0	0	0	0	0	0	0	0	0	0	0	0
01:30:00	0	0	0	0	0	0	0	0	0	0	0	0	0	0	0	0	0	0	0	0	0	0	0	0	0	0	0	0	0	0	0	0	0	0	0	8	4	0	0	0	0	0	0	0	0	0	0	0	0
02:00:00	0	0	0	0	0	0	0	0	0	0	0	0	0	0	0	0	0	0	0	0	0	0	0	0	9	0	0	0	0	0	0	0	0	0	0	4	2	0	0	0	0	0	0	0	0	0	0	0	0
02:30:00	0	0	0	0	0	0	0	0	0	0	0	0	0	0	0	0	0	0	0	0	0	0	0	0	0	0	0	1	3	0	0	0	0	0	0	0	0	0	0	0	0	0	0	0	0	0	0	0	0
03:00:00	0	0	0	0	0	0	0	0	0	0	0	0	0	0	0	0	0	0	0	0	0	0	0	0	0	0	0	4	4	0	0	0	0	0	0	0	0	0	0	0	0	0	0	0	0	0	0	0	0
03:30:00	0	0	0	0	0	0	0	0	0	0	0	0	0	0	0	0	0	0	0	0	0	0	0	0	0	0	0	17	6	0	0	0	0	0	0	0	0	0	0	0	0	0	0	31	0	0	1	0	0
04:00:00	0	0	0	0	0	0	0	0	0	0	0	0	0	0	0	0	0	0	0	0	0	0	0	0	8	0	0	1	0	0	1	0	0	0	0	0	0	0	0	0	0	0	0	5	0	0	0	0	0
04:30:00	0	0	0	0	0	0	0	0	0	0	0	0	0	0	0	0	0	0	0	0	0	0	0	0	8	0	0	0	2	0	0	0	0	0	0	0	0	0	0	0	0	0	0	2	0	0	0	0	0
05:00:00	0	0	0	0	0	0	0	0	0	0	0	0	0	0	0	0	0	0	0	0	0	0	0	0	5	0	0	8	0	0	0	0	0	0	0	0	0	0	0	0	0	0	0	46	0	0	0	0	0
05:30:00	0	0	0	0	0	0	0	0	12	0	0	0	1	0	0	0	0	0	0	3	0	2	2	0	13	1	0	29	9	0	13	8	22	10	7	28	22	0	0	0	1	0	3	53	0	0	0	0	0
06:00:00	0	0	2	5	0	0	17	0	43	0	0	11	0	2	0	0	24	19	2	39	55	23	0	0	17	32	19	20	0	18	4	42	21	20	0	53	2	19	0	25	58	3	6	27	1	2	0	0	3
06:30:00	0	0	0	1	5	17	13	1	0	0	0	24	31	31	0	0	1	36	12	26	21	43	24	0	10	16	17	25	10	42	12	23	19	20	6	12	16	3	67	1	6	2	10	12	12	3	25	0	18
07:00:00	32	0	0	0	2	0	23	32	12	0	0	20	32	22	25	1	0	6	4	14	16	43	17	0	15	20	10	34	10	22	7	0	22	32	20	10	2	24	34	2	6	5	12	5	5	16	21	2	4
07:30:00	25	0	27	0	169	0	17	4	8	11	0	7	2	21	6	10	2	0	7	0	10	20	4	0	11	16	9	33	5	0	4	0	17	18	0	6	10	0	1	18	5	6	7	0	3	28	22	6	0
08:00:00	24	1	1	4	23	6	18	6	0	0	0	27	9	3	7	23	9	0	10	16	20	4	24	0	13	6	4	24	8	6	9	8	2	22	2	7	4	24	1	14	6	0	1	3	3	16	16	16	21
08:30:00	29	28	0	0	0	0	20	6	4	3	0	15	10	8	2	0	2	3	13	5	16	20	22	1	47	13	0	14	10	6	8	3	4	10	0	9	3	5	3	2	1	16	10	1	6	34	15	28	10
09:00:00	14	4	31	6	2	5	0	6	1	0	0	20	15	6	14	0	1	3	3	20	14	12	19	42	36	9	6	26	14	6	8	0	1	5	1	2	6	10	0	1	1	1	0	1	5	10	2	9	73
09:30:00	23	2	30	14	1	21	10	16	21	5	1	21	26	26	24	0	14	23	7	23	27	16	20	25	22	19	21	30	6	18	8	19	19	5	0	2	18	39	58	12	25	15	3	18	28	9	19	18	8
10:00:00	13	1	2	18	3	6	13	13	8	8	0	27	30	0	18	43	15	3	5	15	17	16	23	25	11	25	4	14	14	9	7	0	0	8	3	16	9	9	8	4	3	12	3	8	10	7	20	2	8
10:30:00	18	0	0	2	1	2	5	0	2	4	0	17	4	6	2	1	29	0	6	4	12	2	16	15	38	3	5	22	10	0	1	0	2	16	6	4	2	2	0	4	2	4	3	6	3	5	5	12	0
11:00:00	18	0	0	1	0	0	2	0	2	5	0	13	4	5	12	0	0	0	1	11	15	12	14	35	35	10	0	18	4	0	0	0	0	7	1	2	0	2	7	5	13	1	0	1	5	5	0	0	0
11:30:00	7	0	0	0	0	0	10	3	0	31	0	19	5	0	0	7	0	0	1	7	7	8	25	13	24	1	7	9	3	0	0	0	0	13	0	2	0	0	3	0	0	1	0	0	0	6	0	31	0
12:00:00	17	0	104	0	0	0	1	1	7	1	0	16	12	1	0	0	0	0	0	21	18	0	25	15	33	3	0	18	6	1	0	0	0	0	0	3	0	1	0	0	0	2	0	1	4	6	0	0	0
12:30:00	16	0	13	0	0	17	19	2	10	20	0	24	14	0	1	0	3	0	0	17	29	0	17	17	37	18	0	23	15	14	0	8	0	5	0	8	0	17	16	1	6	17	0	15	16	13	31	1	3
13:00:00	8	0	0	0	0	0	14	0	9	2	0	6	17	6	0	15	0	9	2	18	5	8	16	0	22	14	0	19	3	5	0	0	0	5	0	2	0	7	0	14	0	2	0	0	4	0	10	0	1
13:30:00	0	0	0	1	0	0	1	0	14	0	0	7	3	0	0	0	0	1	0	3	1	9	10	0	35	2	0	8	1	0	0	0	0	10	0	0	0	1	0	0	0	14	0	0	0	0	0	0	0
14:00:00	0	0	0	1	0	0	0	0	0	0	0	10	0	8	0	0	0	0	0	1	0	44	11	0	11	0	0	7	0	0	0	0	0	0	0	2	0	0	0	0	0	10	0	0	1	0	0	0	0
14:30:00	2	0	0	4	0	0	0	0	0	7	0	5	0	0	0	9	0	0	0	0	0	5	0	0	21	0	1	9	0	0	0	0	0	0	0	0	0	0	0	0	0	14	0	1	32	0	0	0	0
15:00:00	0	0	3	40	0	0	0	0	0	4	0	8	0	0	0	4	0	0	0	0	0	6	0	0	17	0	0	10	0	0	0	0	0	0	0	0	30	0	0	0	0	0	0	0	0	0	0	20	0
15:30:00	0	0	0	0	0	0	0	0	0	0	0	0	0	0	0	10	0	0	0	0	0	3	1	0	16	0	0	2	0	0	0	0	0	0	0	0	29	0	0	0	0	1	0	0	0	0	0	0	0
16:00:00	0	0	0	0	0	2	1	0	1	1	0	0	3	0	1	7	0	48	0	0	0	8	0	9	6	0	0	2	1	0	0	0	0	0	0	0	5	0	5	2	0	12	0	0	0	0	0	0	0
16:30:00	0	0	0	0	0	1	0	0	9	1	0	0	1	0	0	0	0	0	0	0	0	1	0	32	11	6	0	10	0	0	0	0	0	0	9	0	0	0	14	2	0	0	0	1	22	14	16	0	0
17:00:00	0	0	0	0	0	0	2	0	5	0	0	0	44	0	0	0	0	0	0	0	0	0	0	4	11	6	3	8	0	0	0	0	0	0	10	0	6	0	0	4	0	0	0	0	12	13	5	0	19
17:30:00	0	0	0	0	27	0	4	0	2	0	0	0	5	0	0	0	0	27	0	0	0	0	0	4	21	1	0	12	0	0	1	14	0	0	6	0	19	0	1	0	2	0	0	0	7	6	0	0	0
18:00:00	0	0	0	0	34	0	8	0	9	0	0	10	16	1	0	15	13	16	0	0	0	4	3	28	7	0	1	6	2	0	0	2	0	0	2	0	18	0	1	2	13	0	4	0	7	0	14	9	29
18:30:00	0	0	0	0	25	0	1	0	7	0	0	12	10	11	0	14	19	3	0	0	1	1	0	0	9	0	0	11	5	0	36	3	0	0	0	0	11	0	0	6	3	0	11	8	2	0	16	0	0
19:00:00	0	0	1	0	6	0	0	0	0	0	2	20	17	18	0	16	0	2	0	0	4	52	7	1	22	0	2	11	5	1	7	0	0	0	12	0	13	0	2	2	17	2	17	11	8	0	2	4	0
19:30:00	14	0	9	10	11	0	28	0	18	0	14	19	43	0	0	9	10	25	0	0	21	42	27	25	27	2	0	8	19	6	0	1	2	3	1	0	34	1	0	24	10	17	31	31	27	0	16	6	37
20:00:00	72	57	52	53	68	67	70	66	49	70	61	62	76	57	73	56	116	55	60	63	68	76	66	58	97	88	61	84	56	71	58	49	73	80	58	108	84	67	75	56	66	70	65	77	61	76	63	61	60
20:30:00	85	72	48	67	70	76	81	75	64	58	53	63	98	85	96	55	83	53	68	61	60	86	66	74	95	102	70	70	41	94	43	65	81	80	59	80	78	52	83	55	68	48	58	71	66	70	82	44	42
21:00:00	49	28	11	15	4	28	36	51	17	0	0	31	13	43	68	19	31	52	45	39	47	47	55	47	62	25	51	22	15	50	13	63	35	83	47	43	74	14	2	4	13	12	33	18	68	65	34	47	41
21:30:00	0	0	0	0	0	0	0	0	0	0	0	0	0	3	0	2	0	29	0	0	1	7	3	0	3	0	0	0	0	0	2	5	5	9	10	5	3	0	0	0	0	0	12	0	3	0	0	66	70
22:00:00	0	0	0	0	0	0	0	0	0	0	0	0	0	0	0	0	2	0	0	0	0	0	0	0	4	0	0	0	0	0	0	0	0	1	0	4	0	0	0	0	0	0	6	0	0	0	0	11	30
22:30:00	0	0	0	0	0	0	0	0	0	0	0	0	0	0	0	0	0	0	0	0	0	0	0	0	0	0	0	0	0	0	0	0	0	1	1	4	0	0	0	0	0	0	5	0	0	0	0	0	10
23:00:00	0	0	0	0	0	0	0	0	0	0	0	0	0	0	0	0	0	0	0	0	0	0	0	0	0	0	0	0	0	0	0	0	0	0	9	5	0	0	0	0	0	0	1	0	0	0	0	0	0
23:30:00	0	0	0	0	0	0	0	0	0	0	0	0	0	0	0	0	0	0	0	0	0	0	0	0	4	0	0	0	0	0	0	0	0	0	3	3	0	0	0	0	0	0	2	0	0	0	0	0	0
00:00:00	0	0	0	0	0	0	0	0	0	0	0	0	0	5	0	0	3	2	0	0	0	0	0	0	1	0	0	0	0	0	0	0	0	0	21	13	0	0	0	0	0	0	0	0	0	0	0	0	0
00:30:00	0	0	0	0	0	0	0	0	30	0	0	0	0	0	0	0	0	2	0	0	0	0	0	0	0	0	0	0	0	0	0	0	0	0	25	0	0	0	0	0	0	0	0	0	0	0	0	0	6
01:00:00	0	0	0	0	0	0	0	0	0	0	0	0	0	0	0	0	2	0	0	0	0	0	0	0	4	0	0	0	0	0	0	0	0	0	9	0	0	0	0	0	0	0	0	0	0	0	0	0	2
01:30:00	0	0	0	0	0	0	0	0	0	0	0	0	0	0	0	0	7	2	0	0	0	0	0	0	6	0	0	0	0	0	0	0	0	3	4	0	0	0	0	0	0	0	0	0	0	0	0	0	1
02:00:00	0	0	0	0	0	0	0	0	0	0	0	0	0	0	0	0	0	0	0	0	0	0	0	0	12	0	0	0	0	0	0	0	0	0	0	0	0	0	0	0	0	0	0	0	0	0	0	0	0
02:30:00	0	0	0	0	0	0	0	0	0	0	0	0	0	0	14	0	7	0	0	0	0	9	0	0	5	0	0	0	0	4	0	0	0	0	2	0	0	0	0	0	0	0	0	0	0	0	0	6	32
03:00:00	0	0	0	0	0	0	0	0	0	8	0	0	0	0	0	0	0	2	0	0	0	1	0	0	2	0	0	0	0	0	0	0	0	0	9	0	0	0	0	0	0	0	0	0	0	1	0	4	0
03:30:00	0	0	0	0	0	0	0	0	0	2	0	0	0	0	0	0	0	13	0	0	0	0	0	0	2	0	0	0	0	5	0	0	0	0	0	0	0	0	0	0	0	0	0	0	0	0	0	18	5
04:00:00	0	0	0	0	0	0	0	0	0	0	0	0	13	0	0	0	0	17	0	0	0	0	0	0	0	0	0	23	0	0	0	0	0	0	3	0	0	0	0	0	0	0	0	0	0	0	0	0	0
04:30:00	0	0	2	0	0	0	0	0	0	0	0	0	1	0	0	0	0	0	0	0	0	13	0	0	6	0	0	0	0	0	0	0	0	0	7	10	0	0	0	0	0	0	0	0	0	0	0	0	0
05:00:00	0	0	0	0	0	0	0	0	0	0	0	0	0	0	0	0	0	1	0	0	0	0	0	0	0	0	0	0	0	0	0	0	1	0	0	2	0	0	0	0	0	0	0	0	0	9	0	0	0
05:30:00	0	0	0	0	0	0	0	0	0	0	0	0	2	0	0	0	0	21	0	3	0	0	1	0	19	0	0	37	34	0	0	0	24	19	0	8	0	0	0	0	0	0	4	0	0	2	0	0	0
06:00:00	5	0	8	0	0	0	3	11	2	2	0	1	0	0	0	0	22	28	0	53	44	0	0	0	35	8	78	43	3	0	0	3	18	48	0	18	0	0	0	4	48	0	10	20	2	3	8	0	0
06:30:00	9	0	20	1	17	0	54	22	34	1	0	4	2	13	7	0	23	8	7	18	19	11	10	0	12	14	26	20	0	0	1	1	25	26	0	8	8	16	56	6	0	0	20	17	21	5	34	0	0
07:00:00	39	4	2	0	0	0	16	15	13	0	0	15	35	25	11	0	38	5	12	7	21	31	14	0	5	19	13	11	0	1	0	0	10	17	0	8	26	3	2	5	0	0	6	6	6	24	21	0	9
07:30:00	18	11	0	67	5	0	35	3	0	0	0	2	16	8	6	5	12	5	7	0	28	80	10	0	6	18	22	16	1	3	0	1	5	5	0	3	60	3	1	9	6	0	6	2	11	30	14	0	12
[truncated: 83 more columns]

## Sheet: Fig 1 S1 B (WT strain 2)
FED	M25-6.12														M48-6.12													M17-6.15														+sucrose	+sucrose SEM	+sucrose survival		ST	M25-6.12-ST
20:30:00	29	47	26	49	66	45	25	54	40	37	45	15	28	48	33	29	33	40	31	48	37	71	47	72	62	12	35	36	38	64	36	26	53	27	19	18	70	11	67	9		39.45	2.72993	1		20:30:00	56	39	34
21:00:00	7	17	31	3	60	25	25	33	58	43	40	6	25	15	62	25	30	33	27	38	4	45	53	84	54	1	44	23	25	5	11	15	20	13	6	13	50	0	26	10		27.625	3.14045	1		21:00:00	41	37	12
21:30:00	3	15	9	6	80	25	24	36	85	21	22	0	9	6	35	34	20	13	26	28	3	28	6	65	54	9	22	1	8	3	1	6	0	4	4	0	34	0	9	0		18.85	3.36146	1		21:30:00	44	12	1
22:00:00	1	7	10	3	15	0	11	21	63	14	30	0	0	0	12	6	18	2	34	15	4	0	44	19	50	0	34	0	20	0	0	0	0	7	5	9	8	0	1	3		11.65	2.41113	1		22:00:00	26	3	0
22:30:00	16	3	0	0	13	0	3	9	57	11	14	0	0	0	4	28	13	4	12	0	14	0	10	16	24	3	14	0	0	0	0	4	0	0	7	7	0	0	2	1		7.225	1.714	1		22:30:00	27	1	0
23:00:00	2	0	0	0	0	0	0	5	13	11	13	0	0	0	0	3	2	0	0	0	1	0	0	0	9	1	0	0	0	0	2	0	0	1	0	4	0	3	8	0		1.95	0.580616	1		23:00:00	15	0	0
23:30:00	4	0	0	5	0	0	0	0	0	0	0	0	0	0	0	0	10	5	0	0	2	0	0	3	3	0	0	0	0	0	0	0	1	0	0	7	20	0	0	0		1.5	0.592691	1		23:30:00	0	0	6
00:00:00	7	0	0	0	0	0	0	11	0	1	1	0	0	0	0	1	14	0	0	0	5	0	0	23	2	1	0	0	0	0	0	0	15	0	0	14	17	0	0	2		2.85	0.918855	1		00:00:00	0	0	12
00:30:00	0	0	0	0	11	0	0	0	0	0	1	0	4	0	0	2	0	0	0	0	0	0	0	11	4	1	0	0	0	0	0	8	3	0	0	1	0	0	0	1		1.175	0.438365	1		00:30:00	0	0	0
01:00:00	0	4	0	0	0	0	0	14	0	0	11	0	16	0	0	7	0	0	0	0	0	0	86	0	7	0	0	0	0	0	0	0	2	0	11	3	0	8	0	0		4.225	2.20241	1		01:00:00	0	0	0
01:30:00	0	0	0	0	0	0	0	1	0	0	1	0	3	26	0	16	0	0	0	0	0	0	19	0	15	0	0	0	0	0	0	0	9	0	7	0	1	23	0	6		3.175	1.08065	1		01:30:00	0	0	0
02:00:00	0	0	0	0	0	0	0	1	0	1	1	16	0	0	7	19	2	20	0	0	0	0	0	0	4	2	0	0	0	0	0	0	50	0	2	0	5	26	0	0		3.9	1.5379	1		02:00:00	0	0	0
02:30:00	0	0	0	0	0	0	0	1	0	0	3	0	0	0	4	0	24	15	0	0	0	2	0	0	4	10	0	0	0	0	0	0	9	0	0	0	2	0	0	0		1.85	0.757484	1		02:30:00	0	0	0
03:00:00	0	0	10	0	7	0	0	28	0	0	2	0	0	0	0	0	13	1	0	0	0	0	0	0	9	0	0	0	0	0	0	10	0	0	0	0	0	0	0	0		2	0.850339	1		03:00:00	0	0	4
03:30:00	0	0	12	0	0	0	0	0	0	0	0	2	0	0	22	0	2	5	0	0	0	0	0	0	18	1	0	0	0	0	0	0	3	0	0	0	0	17	0	0		2.05	0.845766	1		03:30:00	0	0	46
04:00:00	0	0	7	0	0	0	0	0	0	0	16	5	0	0	7	0	0	2	0	0	0	0	8	0	26	7	0	0	0	0	0	0	0	0	0	8	0	0	0	1		2.175	0.819543	1		04:00:00	0	0	3
04:30:00	0	0	6	0	2	0	0	16	0	0	56	0	0	0	20	0	0	22	0	0	0	0	0	0	2	0	0	0	0	0	0	0	0	0	0	4	0	0	0	8		3.4	1.58874	1		04:30:00	0	0	4
05:00:00	24	0	9	0	5	0	0	0	0	0	15	0	0	0	64	0	0	1	0	0	27	0	0	14	19	0	0	6	1	0	0	0	0	0	0	32	0	0	0	0		5.425	1.98936	1		05:00:00	0	5	19
05:30:00	0	0	0	0	1	0	0	0	0	15	10	0	0	0	5	21	0	23	0	0	21	0	0	3	8	26	0	1	0	0	0	0	0	0	0	0	0	0	0	0		3.35	1.15	1		05:30:00	0	0	0
06:00:00	0	0	0	0	0	0	0	3	0	3	2	0	0	0	0	0	0	0	0	0	0	44	0	34	20	1	0	0	0	36	0	0	0	13	0	0	0	0	3	4		4.075	1.6681	1		06:00:00	0	0	0
06:30:00	0	0	16	0	0	0	0	13	17	2	5	0	1	0	0	0	0	0	0	15	0	0	0	0	4	0	0	0	0	41	0	0	0	15	9	0	0	0	0	1		3.475	1.26338	1		06:30:00	0	0	0
07:00:00	0	18	0	2	0	0	0	0	38	0	2	0	0	0	17	0	0	0	0	0	0	0	0	0	0	0	0	0	0	0	0	0	0	0	0	0	0	0	6	0		2.075	1.11193	1		07:00:00	0	0	0
07:30:00	0	0	0	2	0	1	0	0	49	0	1	14	0	0	6	23	12	0	0	1	23	0	0	36	0	3	0	0	10	24	0	0	0	2	0	0	0	0	2	0		5.225	1.74293	1		07:30:00	0	0	5
08:00:00	0	8	0	0	0	33	0	0	0	0	0	0	0	0	17	0	29	0	0	13	0	14	33	8	0	0	0	0	0	0	0	13	0	0	0	0	0	7	21	0		4.9	1.49778	1		08:00:00	0	14	0
08:30:00	28	47	24	44	43	33	12	41	27	32	45	22	36	38	36	31	19	44	34	28	40	67	28	49	42	43	21	38	39	22	27	35	43	33	35	19	66	38	37	5		34.775	1.935	1		08:30:00	35	38	8
09:00:00	28	27	39	52	30	32	28	30	33	34	29	20	24	33	33	34	17	32	31	31	33	49	17	38	40	25	15	25	27	27	33	29	44	37	42	21	50	42	26	10		31.175	1.46274	1		09:00:00	52	33	29
09:30:00	19	19	24	50	46	35	32	26	30	25	29	10	17	20	30	24	14	35	25	19	20	40	12	28	37	11	16	20	17	25	23	22	14	24	26	18	41	31	21	9		24.6	1.52071	1		09:30:00	51	27	33
10:00:00	13	12	11	53	23	24	25	23	21	28	22	28	17	24	22	18	7	33	23	14	25	40	10	21	38	11	0	9	19	19	19	17	41	16	20	14	38	8	22	13		21.025	1.66544	1		10:00:00	52	22	16
10:30:00	19	17	12	33	40	33	21	23	27	22	22	18	19	23	15	21	10	20	11	18	6	31	9	16	33	24	15	20	17	22	16	11	2	12	25	15	46	22	15	9		19.75	1.41863	1		10:30:00	18	17	28
11:00:00	15	16	15	24	12	27	30	24	26	15	25	24	14	8	24	19	9	24	15	24	17	27	6	15	31	5	16	15	19	19	21	22	31	24	13	11	27	9	28	11		18.925	1.13136	1		11:00:00	17	26	26
11:30:00	17	3	8	36	7	36	20	13	22	7	23	2	3	7	16	11	10	18	6	14	15	20	6	17	31	13	0	2	18	20	13	9	1	18	15	12	36	4	16	10		13.875	1.48677	1		11:30:00	11	18	11
12:00:00	25	7	15	37	17	16	17	25	29	14	14	0	14	9	13	8	10	17	13	26	5	17	6	13	29	35	16	26	14	10	16	4	27	6	9	14	14	9	10	9		15.375	1.34769	1		12:00:00	22	30	14
12:30:00	10	8	3	26	12	21	12	16	14	39	20	0	5	3	10	8	7	10	9	12	13	4	12	5	36	0	1	8	14	11	13	17	20	12	23	7	10	10	8	10		11.975	1.33084	1		12:30:00	9	18	35
13:00:00	27	0	7	22	14	0	1	17	7	12	17	0	11	5	15	10	10	6	11	19	4	9	7	28	32	37	3	1	8	4	18	10	2	8	7	12	24	12	11	10		11.45	1.41283	1		13:00:00	3	26	20
13:30:00	13	0	0	9	6	27	23	9	0	9	14	0	6	0	10	6	7	12	4	9	6	6	7	5	24	15	3	0	11	13	14	11	0	15	19	10	0	11	7	10		8.775	1.07506	1		13:30:00	16	14	26
14:00:00	14	5	1	12	3	11	14	14	0	12	5	0	0	1	10	7	6	10	4	9	7	14	8	10	29	8	0	0	10	10	8	3	2	1	6	9	25	0	0	28		7.9	1.14958	1		14:00:00	10	12	19
14:30:00	18	2	0	24	0	0	12	30	11	2	24	0	3	5	7	8	28	20	15	12	8	1	2	20	27	0	1	0	0	4	5	0	7	20	24	6	7	2	8	8		9.275	1.47413	1		14:30:00	8	4	14
15:00:00	6	30	0	0	9	25	11	6	3	0	2	0	8	1	13	4	5	0	11	11	10	3	6	3	5	9	0	0	0	10	9	0	0	8	4	6	0	0	0	26		6.1	1.15292	1		15:00:00	10	4	36
15:30:00	8	0	0	10	0	13	12	10	0	2	5	0	0	1	4	5	7	0	0	11	1	4	1	3	12	8	0	0	0	0	13	0	24	1	44	4	0	15	0	1		5.475	1.33445	1		15:30:00	0	12	20
16:00:00	0	0	0	14	0	0	23	3	4	3	0	0	0	0	10	11	0	0	0	4	0	17	4	3	24	20	20	0	0	0	11	0	0	11	0	1	0	0	2	0		4.625	1.15397	1		16:00:00	6	8	8
16:30:00	16	6	12	24	12	25	19	14	15	0	6	14	0	17	8	4	13	5	5	14	0	4	0	10	10	1	19	0	0	24	0	0	0	0	27	3	1	14	1	0		8.575	1.32234	1		16:30:00	17	28	23
17:00:00	16	1	3	20	2	15	3	0	0	0	7	0	0	10	9	5	5	28	4	17	22	9	10	11	21	1	0	0	0	0	0	0	0	0	7	0	0	9	0	0		5.875	1.20106	1		17:00:00	5	0	15
17:30:00	11	0	0	1	0	1	13	0	0	0	5	0	0	0	1	4	8	3	2	11	12	3	2	1	10	21	0	0	0	0	0	1	1	0	2	3	0	4	0	0		3	0.760398	1		17:30:00	27	20	28
18:00:00	17	1	0	1	1	0	0	19	0	0	11	0	1	15	9	9	0	17	1	6	1	24	1	23	7	28	0	0	1	0	18	16	0	0	10	4	0	14	0	0		6.375	1.31446	1		18:00:00	13	9	14
18:30:00	5	45	0	8	0	9	6	0	0	8	4	0	0	2	10	14	13	16	0	2	8	9	0	15	19	28	1	0	1	0	3	0	12	14	8	3	0	6	0	0		6.725	1.43357	1		18:30:00	8	12	13
19:00:00	0	2	0	16	5	31	24	0	2	0	5	3	0	30	9	21	10	22	12	13	18	16	4	26	28	4	0	0	0	3	10	17	26	13	12	9	9	11	0	18		10.725	1.52836	1		19:00:00	10	24	42
19:30:00	18	3	9	35	16	30	27	15	57	9	15	28	11	39	21	16	9	27	15	18	8	37	4	24	30	26	20	13	8	0	10	11	24	10	10	8	20	12	7			17.9487	1.85687	0.975		19:30:00	13	54	39
20:00:00	18	8	6	31	22	31	39	25	14	19	12	29	8	16	16	22	13	27	9	28	21	34	3	39	37	19	26	6	7	33	16	19	40	27	30	15	32	19	11			21.2051	1.66093	0.975		20:00:00	27	30	46
20:30:00	38	28	16	59	60	56	40	71	79	50	30	39	21	38	44	33	55	35	19	37	30	65	25	53	87	34	40	10	10	30	32	11	34	26	22	17	55	43	15			38.1282	3.02156	0.975		20:30:00	54	79	61
21:00:00	2	11	0	9	5	32	0	20	14	2	12	0	0	0	26	6	13	14	1	14	5	5	0	9	21	3	6	0	0	11	0	0	2	3	0	0	5	0	14			6.79487	1.28428	0.975		21:00:00	37	58	42
21:30:00	3	0	0	0	2	15	0	7	0	3	3	0	0	0	18	3	0	10	0	2	0	21	0	6	9	2	0	0	0	6	3	0	0	0	0	0	6	0	20			3.5641	0.932828	0.975		21:30:00	16	42	39
22:00:00	7	0	0	5	0	0	0	8	0	1	12	0	0	0	0	13	0	0	0	0	0	0	0	3	6	2	0	0	2	6	0	0	0	0	0	0	0	0	6			1.82051	0.549656	0.975		22:00:00	15	0	21
22:30:00	4	30	1	0	0	3	1	0	0	3	4	0	0	0	0	6	0	0	0	0	2	0	35	4	8	3	0	0	0	33	0	0	0	0	0	0	0	0	7			3.69231	1.40183	0.975		22:30:00	2	0	55
23:00:00	18	5	5	0	0	6	0	0	0	0	4	0	0	0	0	5	0	1	0	10	0	0	1	0	0	2	0	0	5	14	5	0	0	0	0	0	0	0	4			2.17949	0.653932	0.975		23:00:00	2	0	6
23:30:00	13	1	3	0	0	0	0	0	0	5	0	0	0	0	0	2	0	6	0	0	0	0	9	1	1	0	0	0	0	0	0	0	0	0	12	0	0	0	10			1.61538	0.56269	0.975		23:30:00	4	0	40
00:00:00	0	0	0	1	0	1	0	0	0	2	0	0	0	0	0	0	0	0	0	0	0	4	0	1	0	6	0	0	0	3	1	0	0	0	2	0	5	0	3			0.74359	0.240102	0.975		00:00:00	9	0	24
00:30:00	1	0	0	0	0	0	0	0	0	1	0	0	0	0	0	0	0	0	0	0	0	0	0	0	0	2	0	0	0	0	1	0	0	0	0	0	0	0	0			0.128205	0.0655042	0.975		00:30:00	0	0	22
01:00:00	0	0	18	0	0	0	0	0	0	2	0	0	2	0	0	0	0	0	0	0	0	0	0	0	0	11	0	0	0	0	0	0	0	0	0	0	3	0	0			0.923077	0.537883	0.975		01:00:00	0	0	1
01:30:00	0	0	13	0	0	0	0	0	0	0	1	0	0	0	0	0	0	0	0	6	0	0	0	0	0	0	0	0	0	2	0	0	0	0	0	0	0	0	7			0.74359	0.400266	0.975		01:30:00	0	0	20
02:00:00	0	0	3	0	0	0	0	0	0	0	11	0	0	0	1	0	0	0	0	0	3	0	0	2	0	0	0	0	0	1	0	0	0	0	0	0	0	0	21			1.07692	0.604063	0.975		02:00:00	0	0	0
02:30:00	0	0	0	0	0	0	6	0	0	0	0	0	0	0	0	0	0	3	0	0	7	0	0	0	0	0	2	0	0	0	0	0	0	0	0	0	0	0	16			0.871795	0.467831	0.975		02:30:00	0	0	32
03:00:00	22	0	0	0	0	0	0	0	0	0	0	0	0	0	0	0	0	0	0	0	36	0	0	5	0	0	0	0	1	0	0	0	0	0	0	0	0	0	13			1.97436	1.10909	0.975		03:00:00	0	1	40
03:30:00	0	0	0	0	0	0	0	0	0	0	7	0	0	9	0	0	0	0	0	0	0	0	0	36	3	2	0	0	1	0	0	0	0	0	0	0	0	0	0			1.48718	0.95575	0.975		03:30:00	0	0	33
04:00:00	0	0	0	0	3	0	0	0	0	0	1	0	0	0	37	0	1	0	0	0	0	0	0	0	0	7	0	0	0	0	0	0	0	0	0	0	0	0	0			1.25641	0.960571	0.975		04:00:00	0	0	28
04:30:00	8	0	0	5	0	0	0	0	1	0	7	0	0	23	0	0	0	0	0	0	0	0	0	7	0	6	0	29	0	0	0	0	0	0	0	0	20	0	0			2.71795	1.07288	0.975		04:30:00	0	0	28
05:00:00	22	0	0	4	0	0	0	0	0	0	2	0	0	0	10	0	0	52	0	0	0	0	0	21	0	5	0	0	0	0	0	0	0	0	0	4	22	0	0			3.64103	1.59219	0.975		05:00:00	0	0	16
05:30:00	0	0	0	0	0	0	8	0	60	0	0	0	10	0	3	27	0	5	0	0	1	0	0	13	0	0	0	0	1	0	0	0	0	0	0	0	4	0	0			3.38462	1.69687	0.975		05:30:00	0	0	30
06:00:00	0	0	0	0	0	0	0	0	0	2	0	0	3	0	1	11	38	0	0	0	9	1	0	8	0	0	0	0	17	40	0	23	0	0	0	0	0	34	0			4.79487	1.72353	0.975		06:00:00	0	0	0
06:30:00	0	0	0	0	12	0	3	0	0	0	0	0	3	0	0	0	8	27	0	0	23	0	0	35	0	0	0	0	21	8	0	0	0	0	0	0	0	0	2			3.64103	1.35001	0.975		06:30:00	0	0	40
07:00:00	0	0	0	0	21	0	5	0	0	0	0	0	24	0	0	0	0	12	0	17	0	57	0	0	0	1	0	0	4	0	0	9	0	0	0	0	15	0	5			4.35897	1.7095	0.975		07:00:00	0	0	22
07:30:00	0	0	0	0	15	0	0	0	0	0	2	0	3	0	0	0	0	0	0	0	0	1	0	0	0	5	0	0	9	0	0	26	0	0	0	3	0	0	0			1.64103	0.790025	0.975		07:30:00	28	0	2
08:00:00	2	0	0	22	0	0	0	0	0	0	2	0	0	0	20	0	0	0	0	0	0	0	0	0	0	0	0	0	2	0	0	0	0	0	0	8	0	0	0			1.4359	0.770399	0.975		08:00:00	43	0	52
08:30:00	47	24	33	68	53	45	47	47	40	43	52	36	36	40	40	44	22	51	35	42	44	62	32	42	43	21	25	17	66	39	42	41	47	36	47	38	50	29	36			41.0769	1.79758	0.975		08:30:00	42	51	47
09:00:00	18	19	13	52	37	41	47	37	30	25	27	27	20	29	38	24	11	36	3	30	20	36	7	39	43	3	27	20	14	29	24	14	17	24	43	17	38	13	21			25.9744	1.93745	0.975		09:00:00	28	39	35
09:30:00	22	13	35	59	26	27	24	17	20	22	24	35	19	24	26	21	11	31	17	23	20	31	11	29	27	0	21	20	8	22	18	9	33	13	24	10	25	12	15			21.641	1.59642	0.975		09:30:00	22	33	37
10:00:00	11	8	12	37	18	32	6	36	24	16	26	25	15	11	29	17	6	22	12	15	18	31	11	26	24	7	7	4	2	23	11	17	22	17	17	12	34	16	20			17.8718	1.45846	0.975		10:00:00	18	23	34
10:30:00	12	2	0	32	10	25	28	17	19	8	19	7	22	11	20	14	6	22	0	26	12	23	3	28	30	2	22	7	7	9	19	8	8	12	22	9	22	4	85			16.2051	2.31121	0.975		10:30:00	19	24	24
11:00:00	16	20	8	24	7	31	4	33	6	9	23	12	7	9	11	8	9	23	6	17	7	17	5	24	23	2	8	22	11	8	11	7	29	24	25	6	8	13	11			13.9487	1.34222	0.975		11:00:00	15	38	36
11:30:00	17	6	3	16	0	11	0	12	6	16	17	4	11	0	9	10	12	10	0	25	9	12	11	15	20	7	16	0	12	13	10	13	0	15	5	18	22	4	18			10.3846	1.06256	0.975		11:30:00	11	28	33
12:00:00	5	0	2	9	17	25	21	14	4	8	7	0	5	6	8	4	16	22	0	12	1	16	3	28	16	5	13	15	10	12	9	0	0	7	9	11	2	15	21			9.69231	1.19669	0.975		12:00:00	26	28	33
12:30:00	12	0	6	18	6	15	11	8	0	13	8	0	7	0	11	13	13	17	12	10	14	11	7	17	11	7	3	1	28	3	12	8	36	10	0	3	8	1	17			9.66667	1.21136	0.975		12:30:00	19	39	31
13:00:00	16	8	27	21	4	22	12	16	0	6	6	0	24	0	19	12	1	11	7	4	8	8	3	7	43	2	1	0	1	6	10	0	15	7	10	6	0	6	6			9.10256	1.45967	0.975		13:00:00	13	16	68
13:30:00	15	0	7	2	0	16	12	3	0	7	0	0	10	10	11	6	7	9	0	13	1	2	5	1	11	7	12	1	0	34	8	5	0	0	13	8	0	3	0			6.12821	1.08987	0.975		13:30:00	17	14	36
14:00:00	3	2	12	9	8	19	0	4	0	14	4	0	0	0	12	3	1	15	3	15	5	4	7	15	0	27	8	0	12	37	5	14	0	1	1	6	0	1	0			6.84615	1.31355	0.975		14:00:00	8	19	63
14:30:00	11	1	29	19	2	17	2	2	0	4	10	1	0	0	5	3	4	4	0	7	4	2	1	7	20	0	0	0	3	45	6	20	20	14	12	3	0	0	0			7.12821	1.55084	0.975		14:30:00	21	14	61
15:00:00	3	0	24	9	0	1	0	2	0	4	4	39	0	2	10	4	1	1	1	15	0	2	4	1	6	5	19	0	14	50	0	10	0	0	3	1	1	14	0			6.41026	1.72609	0.975		15:00:00	14	17	66
15:30:00	11	0	0	2	0	16	0	1	0	1	1	6	6	10	8	4	5	17	0	7	11	10	9	13	1	25	20	0	12	23	1	10	5	2	0	13	30	2	0			7.23077	1.25466	0.975		15:30:00	13	19	74
16:00:00	0	0	0	1	0	23	4	0	0	2	13	1	0	1	0	3	10	10	0	10	12	8	1	4	23	9	1	0	6	1	3	1	1	0	1	2	3	7	0			4.12821	0.941027	0.975		16:00:00	10	10	36
16:30:00	0	0	0	0	0	3	0	0	0	4	1	6	0	0	10	6	6	9	0	12	0	6	3	5	16	13	0	0	0	50	13	0	0	0	3	3	11	7	0			4.79487	1.40232	0.975		16:30:00	21	5	50
17:00:00	0	0	0	1	26	0	1	10	0	0	1	4	0	3	0	3	2	8	0	0	1	8	3	3	9	22	2	0	0	9	15	0	4	18	12	10	9	6	0			4.87179	1.0437	0.975		17:00:00	38	13	43
17:30:00	0	0	0	3	0	0	0	3	0	0	1	0	0	2	9	3	12	12	0	25	9	3	6	8	17	25	0	0	2	6	7	0	35	8	37	4	16	24	1			7.12821	1.58952	0.975		17:30:00	14	11	49
18:00:00	0	0	0	20	0	22	16	18	1	0	2	0	8	6	15	9	8	6	11	22	1	2	6	14	6	28	0	0	3	4	9	13	0	3	2	2	7	12	0			7.07692	1.20971	0.975		18:00:00	17	56	41
18:30:00	0	0	0	3	7	11	11	34	0	0	1	0	0	4	10	12	7	9	0	1	25	4	4	11	29	29	6	0	2	11	6	7	0	2	4	4	4	11	0			6.89744	1.39199	0.975		18:30:00	22	31	18
19:00:00	0	0	7	29	3	23	33	4	5	3	2	0	18	13	10	14	9	19	9	24	12	4	8	19	26	33	9	7	1	7	8	0	37	17	7	6	5	12	16			11.7692	1.60526	0.975		19:00:00	10	25	24
19:30:00	24	1	30	43	26	39	37	20	24	1	1	1	23	13	12	19	14	25	21	20	16	24	13	33	40	20	16	2	12	25	13	16	15	14	23	2	14	15	15			18.5128	1.7452	0.975		19:30:00	11	21	28
20:00:00	16	3	11	46	34	39	42	13	19	10	13	20	23	16	18	21	13	25	11	18	14	25	11	35	41	26	26	4	19	30	11	25	41	11	18	15	32	20	21			21.4359	1.73275	0.975		20:00:00	30	26	15
20:30:00	31	16	59	53	24	65	54	50	59	67	30	44	16	35	28	34	44	72	28	31	50	82	38	71	75	8	34	22	43	19	28	23	55	35	44	10	78	60	27			42.1026	3.17544	0.975		20:30:00	49	84	13
21:00:00	0	3	3	12	0	24	21	10	0	1	17	0	6	0	15	16	39	55	6	5	33	7	0	20	28	5	8	13	4	5	1	0	22	4	15	0	2	11	7			10.7179	1.96698	0.975		21:00:00	28	37	15
21:30:00	0	0	1	2	0	2	7	0	0	0	8	20	19	0	1	0	2	43	9	0	2	20	0	13	16	7	4	0	0	82	2	0	19	0	20	17	1	0	7			8.30769	2.44346	0.975		21:30:00	36	47	9
22:00:00	0	6	0	5	0	6	10	0	0	0	39	0	1	0	3	0	7	25	3	0	25	5	0	5	3	5	20	0	1	39	0	0	0	23	1	7	0	0	3			6.20513	1.66903	0.975		22:00:00	27	22	7
22:30:00	0	0	0	0	0	1	21	1	8	0	10	0	0	0	7	0	1	0	0	0	47	0	0	7	2	2	4	0	0	4	0	0	0	1	13	0	0	0	0			3.30769	1.34934	0.975		22:30:00	22	24
23:00:00	2	0	0	0	3	15	54	0	0	0	8	0	1	0	9	0	8	10	0	1	6	0	0	0	0	0	0	0	4	21	0	0	0	1	5	0	18	0	0			4.25641	1.55888	0.975		23:00:00	23	26
23:30:00	7	0	2	0	0	10	8	2	0	0	10	0	0	0	3	0	21	17	0	0	4	0	0	5	0	3	0	0	2	17	0	3	10	0	4	0	4	0	1			3.41026	0.858173	0.975		23:30:00	29	19
00:00:00	0	0	0	0	6	4	7	0	46	0	3	0	0	0	4	0	9	4	0	0	1	0	0	0	0	0	0	0	27	1	0	0	11	0	24	0	8	0	29			4.71795	1.6021	0.975		00:00:00	13	23
00:30:00	0	1	0	0	18	8	5	0	1	0	22	0	0	0	0	0	9	17	0	2	12	0	0	0	0	0	2	0	1	0	0	6	0	0	18	0	9	0	0			3.35897	0.979883	0.975		00:30:00	25	25
01:00:00	20	0	1	1	0	0	6	0	3	0	2	0	1	0	0	0	5	6	2	12	0	0	0	0	0	0	0	0	0	0	0	0	0	0	0	0	5	0	0			1.64103	0.626115	0.975		01:00:00	30	15
01:30:00	0	0	0	2	0	0	0	0	3	0	5	0	0	0	0	0	3	0	28	0	0	0	0	29	0	4	0	0	0	0	0	0	40	0	0	0	39	0	4			4.02564	1.68204	0.975		01:30:00	18	27
02:00:00	0	2	26	0	0	10	0	0	2	0	17	0	0	0	0	0	28	1	3	0	24	0	0	0	1	0	0	0	0	34	0	10	0	0	0	0	36	0	9			5.20513	1.64706	0.975		02:00:00	24	17
02:30:00	16	0	7	0	0	0	2	0	53	0	4	0	0	0	1	0	47	66	0	0	4	0	0	3	0	0	0	0	1	10	0	0	0	0	0	0	12	0	2			5.84615	2.41468	0.975		02:30:00	22	17
03:00:00	17	0	0	1	0	3	5	0	2	0	19	0	0	0	2	0	0	5	16	0	3	2	0	2	0	0	0	0	0	0	1	0	0	1	0	0	0	0	0			2.02564	0.749707	0.975		03:00:00	26	16
03:30:00	0	0	0	0	0	0	0	0	7	0	0	0	0	0	0	0	0	32	10	0	0	1	0	1	0	2	0	0	0	0	1	0	0	6	54	0	41	0	1			4	1.87137	0.975		03:30:00	18	5
04:00:00	0	0	0	0	0	0	14	0	1	0	0	0	0	0	6	0	0	20	0	0	0	0	0	14	0	7	0	0	0	0	0	0	8	0	2	0	0	0	4			1.94872	0.741073	0.975		04:00:00	17	3
04:30:00	0	11	31	0	2	0	0	0	2	0	3	0	0	0	2	0	0	14	0	0	0	0	0	26	0	0	0	0	61	0	0	3	0	3	0	0	0	0	0			4.05128	1.85032	0.975		04:30:00	16
05:00:00	0	0	17	0	7	0	0	0	0	0	5	0	0	0	0	0	0	0	1	0	43	0	0	0	0	0	0	0	6	0	0	0	2	0	0	0	3	0	0			2.15385	1.185	0.975		05:00:00	13
05:30:00	0	0	14	16	5	0	24	1	0	0	0	0	2	0	37	0	0	0	10	0	0	0	0	0	0	9	0	0	0	0	0	0	0	0	1	0	4	0	0			3.15385	1.22862	0.975		05:30:00	20
06:00:00	0	0	14	51	10	0	0	0	0	0	5	0	0	0	0	0	0	0	0	0	0	0	0	1	0	0	0	4	0	0	0	0	0	0	2	0	0	0	0			2.23077	1.36194	0.975		06:00:00	10
06:30:00	0	0	24	0	1	0	0	0	0	0	3	0	0	0	3	0	0	0	0	0	33	57	0	1	0	2	0	0	1	0	34	0	0	0	24	0	9	0	31			5.71795	2.08424	0.975		06:30:00	12
07:00:00	0	0	0	0	3	0	0	0	0	0	0	0	0	0	0	0	0	26	0	0	0	0	0	12	0	0	0	0	0	17	0	17	0	0	5	31	0	34	0			3.71795	1.42512	0.975		07:00:00	11
07:30:00	0	0	0	32	37	0	13	0	0	0	0	0	0	0	22	0	0	0	0	0	0	0	0	0	0	0	0	0	0	0	0	0	0	0	0	0	0	34	0			3.53846	1.58299	0.975		07:30:00	7
08:00:00	0	0	0	13	15	11	51	26	15	0	0	0	0	0	12	16	29	3	0	7	0	0	0	11	39	9	35	0	6	0	0	0	0	0	0	0	0	0	0			7.64103	2.01596	0.975		08:00:00	7
[truncated: 43 more columns]

## Sheet: Fig 1 S1 C (WT strain 3)
FED	M24-11.7																M7-11.10																M19 1207
20:30:00	79	72	90	57	60	84	93	161	85	76	106	77	105	69	109	82	64	64	70	171	54	98	66	56	71	52	69	86	77	74	77	73	55	52	36	54	75	89	79	20	68	71	84	92	68	101	72	84
21:00:00	61	134	40	67	21	43	101	130	65	20	56	59	82	78	51	54	38	59	48	37	19	59	53	39	62	53	77	61	97	50	66	50	25	8	0	19	40	54	63	53	52	57	73	70	77	23	47	6
21:30:00	57	21	13	11	8	16	32	22	13	0	22	50	66	38	0	3	24	4	25	14	13	79	5	14	81	32	48	51	51	8	43	29	4	8	1	4	5	35	59	60	16	57	24	68	17	12	34	0
22:00:00	14	5	7	0	15	4	7	13	12	0	21	33	43	6	0	0	9	0	10	6	0	26	19	39	36	42	26	16	33	6	4	5	6	0	0	15	0	28	20	26	6	36	4	36	0	0	5	4
22:30:00	16	0	7	0	0	0	9	1	7	0	7	5	6	1	0	5	6	0	4	0	1	0	136	5	91	8	33	0	12	2	6	0	2	0	2	0	4	12	0	35	13	0	0	0	49	51	10	0
23:00:00	1	0	2	0	0	0	14	0	6	0	24	0	11	0	10	24	0	0	21	2	0	0	68	0	43	11	7	0	2	11	78	3	0	0	9	0	0	25	39	23	0	0	0	0	0	44	1	0
23:30:00	51	0	0	0	0	0	7	0	2	20	47	52	0	0	3	4	17	0	58	1	0	20	14	9	0	52	15	0	0	0	11	7	0	0	2	44	0	8	1	2	14	0	0	0	0	0	9	0
00:00:00	7	0	4	3	0	40	3	0	53	1	4	15	0	0	0	1	7	0	3	0	0	29	11	21	11	8	37	0	0	4	1	36	0	0	0	20	23	64	10	3	31	22	0	0	0	0	37	0
00:30:00	0	0	3	0	0	37	7	0	5	7	3	0	73	0	1	52	46	0	0	0	44	12	7	0	27	0	13	0	9	28	0	66	0	0	0	0	2	36	32	0	32	71	0	0	0	0	0	0
01:00:00	1	0	26	34	0	24	88	0	0	1	1	0	40	0	0	67	57	0	17	0	42	0	0	0	9	0	34	0	37	42	78	33	0	0	0	0	6	63	0	31	0	15	0	0	0	1	0	0
01:30:00	28	15	7	32	0	4	72	0	0	8	0	0	9	0	0	2	56	0	50	0	25	45	1	0	25	0	27	0	35	8	62	0	0	0	0	0	3	16	0	16	15	0	0	0	0	0	11	70
02:00:00	58	34	28	2	0	22	65	2	0	11	84	0	44	0	0	0	42	0	0	0	1	20	6	7	0	35	16	0	31	0	63	0	0	0	0	36	7	0	0	0	0	22	0	0	0	0	52	7
02:30:00	0	0	71	0	0	5	51	0	0	4	37	33	14	3	0	23	25	0	0	0	0	32	3	37	13	0	1	0	2	0	40	39	0	0	0	25	3	52	0	27	0	34	0	0	0	0	68	1
03:00:00	0	18	60	0	44	2	14	0	17	13	17	49	24	0	0	52	30	0	64	0	0	11	0	2	23	13	0	0	0	0	2	61	0	0	0	3	6	3	0	0	0	0	0	0	0	0	52	0
03:30:00	0	91	43	0	0	6	0	0	15	8	26	70	38	0	1	0	59	0	33	0	1	0	0	0	12	10	0	0	0	5	12	47	44	0	0	0	1	38	0	0	0	0	0	0	0	0	0	0
04:00:00	0	130	0	90	0	20	0	0	25	4	38	10	47	0	0	0	22	0	43	0	0	0	0	30	11	0	0	0	27	31	4	20	28	41	18	0	2	62	0	0	0	0	0	0	0	0	0	0
04:30:00	0	9	0	55	0	35	0	0	64	54	16	0	40	0	0	0	33	0	80	0	44	39	0	0	0	0	77	0	49	0	77	50	0	80	58	0	6	13	0	36	0	0	0	0	49	0	52	63
05:00:00	0	47	0	33	0	16	0	0	32	63	0	0	4	0	0	0	0	0	0	0	41	22	0	0	0	0	23	0	31	0	48	27	0	31	0	36	14	55	69	85	0	0	0	18	26	26	61	10
05:30:00	0	0	0	1	11	35	0	0	32	26	0	0	0	9	6	0	0	0	0	0	48	0	0	0	29	0	0	0	0	0	51	28	0	0	0	45	0	9	23	73	0	0	0	137	0	100	59	0
06:00:00	65	0	0	0	29	61	2	0	9	0	0	0	0	42	1	10	0	0	0	6	17	0	72	0	32	0	0	0	0	0	84	22	22	0	0	0	0	59	8	10	0	0	0	75	0	6	10	0
06:30:00	47	0	36	0	9	25	37	0	11	0	0	40	0	20	53	42	0	7	0	0	0	0	65	0	0	18	44	0	0	0	35	21	22	0	0	0	0	25	0	0	0	0	0	6	0	0	0	0
07:00:00	18	0	63	0	0	0	55	0	83	0	0	54	0	0	14	17	0	0	0	0	0	0	36	0	0	46	26	0	0	42	16	1	5	0	0	0	0	12	0	5	54	1	0	0	0	0	39	0
07:30:00	48	0	20	38	0	0	53	0	60	9	0	15	10	0	0	6	24	0	0	0	0	0	3	0	0	33	0	0	67	8	10	0	3	0	22	0	0	25	0	0	19	71	0	0	0	0	71	0
08:00:00	38	0	36	66	0	44	54	38	64	87	12	1	67	0	0	14	87	19	25	6	0	63	0	12	0	4	25	0	71	0	8	47	10	1	54	43	0	61	0	13	0	55	0	0	0	0	0	0
08:30:00	44	61	82	48	61	76	84	115	60	66	78	58	46	57	85	57	66	40	90	76	32	43	50	53	73	54	46	68	56	54	117	49	80	65	79	67	63	46	74	75	95	64	65	60	65	87	78	77	3
09:00:00	39	61	51	63	26	69	106	78	43	89	36	36	37	51	64	74	57	46	69	57	55	53	62	49	49	38	48	70	47	23	60	39	61	48	73	60	65	56	48	54	84	57	54	59	59	59	74	70	3
09:30:00	32	49	60	62	57	69	106	64	49	48	28	35	33	37	59	59	37	44	50	46	17	49	44	48	58	17	47	62	34	27	60	31	42	49	65	47	51	58	48	0	105	54	64	59	62	60	59	67	3
10:00:00	35	47	45	50	50	57	86	88	45	34	29	30	19	42	46	39	39	53	67	44	22	55	24	46	50	4	41	59	36	26	59	63	38	59	54	42	60	55	42	18	33	43	102	31	58	57	37	73	3
10:30:00	50	70	60	46	19	33	67	94	45	33	24	19	20	29	35	55	14	31	40	39	12	46	36	42	43	21	39	37	23	4	71	38	36	57	55	35	48	65	45	23	47	37	51	53	41	54	44	66	3
11:00:00	39	58	59	30	12	17	68	80	26	36	0	11	16	31	11	54	12	6	44	35	26	62	3	47	53	0	32	22	27	7	44	13	43	64	58	31	38	75	46	30	33	43	50	40	36	48	26	46	3
11:30:00	30	53	55	38	18	1	43	68	19	34	26	28	30	15	27	37	2	21	40	21	2	29	3	43	33	0	37	11	21	21	34	18	37	52	65	16	57	84	39	19	28	37	47	61	22	51	27	58	3
12:00:00	16	53	42	13	49	4	23	63	23	75	5	4	8	8	11	49	12	3	16	12	0	13	1	33	23	0	20	4	3	5	11	14	27	48	58	13	35	84	48	33	32	29	50	39	24	43	17	42	3
12:30:00	98	40	41	0	27	0	18	66	5	21	0	7	33	4	6	27	27	0	45	2	0	12	41	25	42	0	24	0	4	1	0	0	19	44	48	2	34	75	48	46	21	30	58	63	10	25	3	16	3
13:00:00	42	14	21	0	8	0	15	19	0	24	0	5	0	3	0	8	1	0	23	4	22	0	8	17	13	0	9	0	33	0	35	30	0	45	31	2	33	67	40	22	13	16	23	38	2	0	0	8	3
13:30:00	73	7	0	1	1	0	2	4	0	68	0	5	0	0	0	17	2	0	16	0	24	4	1	6	2	0	5	0	0	0	2	8	0	20	36	0	2	59	22	24	6	7	9	11	4	2	2	6	3
14:00:00	29	10	1	0	0	0	8	3	0	14	0	0	0	0	0	10	28	0	15	0	0	0	41	6	0	0	5	0	0	0	1	1	0	39	12	1	5	36	19	8	27	3	8	10	6	17	0	11	3
14:30:00	9	2	0	0	0	1	28	4	0	19	0	9	0	0	0	23	37	2	27	0	0	1	1	0	0	34	3	0	0	0	0	6	0	24	9	0	3	23	40	17	30	45	1	4	0	44	0	7	3
15:00:00	2	1	17	0	0	0	10	15	0	0	2	9	0	4	0	80	9	10	17	0	0	7	20	0	0	3	2	0	0	4	0	39	0	11	17	0	1	18	18	52	15	2	28	3	28	0	1	64	3
15:30:00	4	4	33	0	4	0	0	8	0	3	34	0	0	0	0	1	37	0	8	1	45	0	4	0	0	0	0	0	0	13	23	24	14	3	7	0	7	26	33	19	38	0	54	4	29	0	2	9	3
16:00:00	3	6	12	0	0	3	14	0	0	7	32	14	0	10	0	24	19	21	9	0	27	2	13	1	0	0	0	0	0	0	2	34	51	0	4	0	5	27	5	58	9	0	3	1	39	24	0	12	3
16:30:00	0	2	1	0	0	21	38	0	0	41	11	3	0	0	0	1	1	21	14	0	10	2	39	1	0	0	0	0	0	0	0	18	26	12	6	0	20	23	7	24	20	0	1	3	12	37	37	14	3
17:00:00	2	16	37	0	55	42	65	72	60	35	33	37	63	6	40	0	39	0	63	0	16	0	32	24	0	0	55	1	0	0	0	26	25	14	5	0	3	13	0	15	9	0	0	2	22	0	0	7	3
17:30:00	0	3	12	0	0	5	21	0	12	11	3	2	40	8	20	0	12	6	3	0	14	0	29	0	0	0	4	0	0	34	0	27	24	33	3	0	16	8	8	5	1	0	0	0	3	6	11	54	3
18:00:00	3	4	11	0	0	5	30	3	7	1	10	11	14	44	0	0	19	0	30	0	39	14	22	6	0	0	5	0	1	12	1	39	15	6	12	0	12	9	3	70	8	0	9	3	0	21	2	19	3
18:30:00	1	10	19	0	3	21	37	1	5	14	8	15	12	18	0	0	31	99	12	1	28	39	12	2	0	0	12	0	5	28	51	45	44	32	22	0	31	18	11	29	17	0	7	9	22	21	11	23	3
19:00:00	13	14	36	0	5	22	46	31	38	38	8	20	25	23	11	48	20	3	39	5	24	22	14	20	4	38	9	10	43	22	34	30	21	20	18	3	40	31	17	40	5	0	6	4	27	48	63	25	3
19:30:00	22	39	35	3	20	71	74	22	33	15	37	29	35	21	16	15	26	5	36	10	30	29	20	33	47	33	22	17	24	21	31	28	35	25	28	31	30	38	14	39	25	2	28	9	7	53	24	24	3
20:00:00	73	79	51	0	25	28	73	39	39	49	45	14	31	24	24	27	42	18	36	29	37	28	26	12	35	18	62	49	26	26	35	33	33	28	31	21	30	39	23	49	26	12	32	18	14	47	53	40	3
20:30:00	73	78	109	29	66	82	119	154	99	69	75	64	80	80	90	62	81	57	107	84	53	87	64	79	90	57	79	109	84	82	92	91	75	64	60	52	64	102	79	95	61	57	62	74	67	82	82	81
21:00:00	62	106	76	0	52	69	62	107	78	67	61	56	67	44	40	40	48	41	71	62	25	84	34	47	66	41	82	96	57	56	66	56	55	40	14	22	48	98	82	89	26	29	69	67	56	47	73	30
21:30:00	37	44	65	0	16	46	13	4	30	36	46	40	37	28	7	95	50	71	28	25	0	33	36	20	58	29	49	73	37	29	55	62	32	2	0	9	9	26	31	74	9	29	44	11	7	28	52	2
22:00:00	11	15	0	0	0	2	11	0	12	18	8	50	105	0	0	3	25	1	8	4	12	22	20	3	46	13	6	0	4	21	15	60	0	0	0	4	0	12	3	53	5	24	0	4	0	9	2	0
22:30:00	0	6	12	0	0	0	6	0	3	0	0	13	24	0	0	0	7	0	0	6	0	59	37	0	60	0	2	25	16	86	30	46	0	0	0	11	0	19	25	51	11	2	0	0	0	0	37	0
23:00:00	13	29	0	0	0	0	9	0	1	0	6	0	12	0	0	0	18	0	0	3	17	14	0	0	43	0	7	0	0	0	38	20	0	7	0	1	0	2	0	65	1	6	0	0	14	0	2	0
23:30:00	3	0	7	0	0	0	0	0	16	0	0	0	67	0	0	0	40	0	0	3	0	5	0	0	35	0	0	0	0	0	52	45	0	34	0	0	0	3	1	57	0	0	0	0	0	11	0	0
00:00:00	5	4	0	0	0	0	0	0	9	19	0	0	31	0	0	0	14	0	48	25	0	8	46	0	31	0	0	0	13	0	1	43	0	0	0	0	0	22	6	11	0	0	0	0	8	7	16	0
00:30:00	8	28	0	0	0	0	9	0	23	25	28	0	10	0	0	0	14	0	0	30	0	14	4	0	0	0	13	0	0	0	4	34	0	0	6	34	0	20	11	40	1	0	0	7	27	0	28	0
01:00:00	11	12	0	5	0	0	1	0	38	0	0	0	20	0	0	11	0	0	24	0	0	0	25	0	0	2	22	0	5	36	67	19	0	0	4	0	0	16	0	33	0	0	0	41	0	0	33	0
01:30:00	35	2	0	0	0	15	73	0	30	8	13	21	42	4	0	39	6	0	35	0	0	0	35	0	27	18	66	0	14	29	53	30	0	0	40	21	0	3	1	31	18	0	0	54	0	1	31	0
02:00:00	37	0	0	0	0	12	18	91	32	26	60	14	35	0	0	0	179	36	0	2	38	62	31	0	106	0	28	0	21	0	53	0	0	0	15	0	0	40	50	5	30	0	25	18	0	65	15	0
02:30:00	55	22	0	0	0	10	54	5	13	0	0	44	36	0	0	0	61	1	14	0	45	24	16	0	12	0	16	0	11	0	21	0	0	4	0	0	0	34	1	47	0	0	11	12	0	20	0	0
03:00:00	27	139	0	0	0	6	24	0	0	0	0	0	26	0	88	0	31	0	0	43	47	0	0	0	0	0	116	0	25	25	0	0	0	67	0	28	36	37	3	3	0	0	14	0	0	31	21	0
03:30:00	11	40	1	7	6	57	28	20	18	8	0	0	0	0	78	0	19	0	0	4	43	0	0	0	0	4	7	0	7	11	0	48	0	28	14	0	8	4	14	0	0	0	29	9	0	0	38	0
04:00:00	16	0	0	0	0	37	9	0	9	0	38	24	0	0	0	0	0	0	39	0	8	0	21	0	0	22	7	0	20	0	0	37	0	10	1	15	0	12	0	0	0	0	41	3	0	0	8	0
04:30:00	0	0	43	15	0	0	0	0	0	0	20	3	0	0	0	0	0	0	8	0	0	53	0	9	0	33	24	0	4	0	27	34	35	0	0	9	0	1	11	21	10	18	34	9	0	0	36	0
05:00:00	0	0	46	11	0	0	0	0	0	0	0	18	0	0	0	36	36	0	136	0	0	48	0	51	0	6	0	0	54	0	68	47	17	0	0	0	0	33	0	3	32	31	0	8	0	0	4	0
05:30:00	0	0	47	10	0	0	0	0	15	0	0	0	0	0	0	16	8	0	4	45	0	45	0	32	0	9	0	1	37	0	39	0	18	0	2	0	0	28	0	30	0	25	0	0	0	0	0	0
06:00:00	0	0	39	79	0	0	0	0	17	0	8	2	33	0	0	0	5	0	0	24	0	10	0	0	0	37	50	0	0	0	11	31	20	0	13	43	0	13	0	3	4	9	0	0	0	0	0	25
06:30:00	0	0	34	48	0	0	0	1	20	0	0	41	47	0	0	0	0	0	96	0	0	32	0	0	0	13	0	0	0	16	13	60	0	12	10	35	44	14	52	0	10	0	0	0	0	0	40	34
07:00:00	0	0	1	38	0	0	0	53	4	7	0	18	42	0	0	0	0	6	73	0	0	29	29	19	25	0	7	0	34	0	36	40	0	41	22	0	40	2	12	0	0	26	0	0	0	1	20	0
07:30:00	46	0	0	44	0	0	34	18	0	19	5	10	0	0	0	0	0	19	40	0	0	2	48	0	11	14	22	0	40	30	45	18	0	10	4	14	6	31	12	0	0	28	17	43	0	0	0	0
08:00:00	35	36	19	21	0	0	25	2	0	0	36	6	19	0	14	24	29	10	0	9	0	31	61	0	0	0	0	24	21	1	39	0	0	0	0	21	0	29	13	0	10	31	79	54	0	0	0	0
08:30:00	44	49	72	41	64	63	82	76	52	53	36	48	45	86	77	69	39	29	63	52	63	53	39	61	54	48	58	111	61	65	80	31	54	42	55	43	50	74	57	84	57	50	47	58	60	76	56	66	3
09:00:00	43	40	61	36	52	54	81	83	54	27	45	33	30	37	48	66	27	60	42	38	50	36	20	30	67	26	41	63	41	26	56	20	54	54	53	43	47	70	42	83	48	42	54	41	45	43	40	57	3
09:30:00	44	41	74	32	40	31	86	69	41	34	28	25	24	31	33	57	27	33	37	36	45	39	19	30	51	17	37	46	28	15	58	36	46	60	57	67	29	73	44	106	36	51	40	35	47	51	50	55	3
10:00:00	37	37	72	28	37	36	100	46	28	25	21	28	18	23	24	61	29	20	29	26	28	41	26	25	59	17	39	37	26	18	59	38	38	78	45	41	24	78	41	87	32	39	61	27	31	48	38	56	3
10:30:00	41	31	65	27	33	14	77	50	11	46	19	32	29	15	28	46	41	19	22	11	32	29	18	23	41	12	31	17	10	7	54	58	34	76	42	48	27	80	31	80	27	55	36	36	26	42	30	60	3
11:00:00	27	27	67	29	0	10	60	45	8	25	17	12	40	23	17	35	39	21	8	23	45	41	22	14	45	16	30	6	22	2	74	22	16	67	45	31	27	77	39	91	25	74	28	38	37	52	44	47	3
11:30:00	23	25	46	30	18	8	33	54	3	22	2	9	19	26	12	40	24	15	35	12	31	25	9	15	36	1	19	1	7	23	43	17	19	61	48	14	26	89	43	52	23	44	29	51	30	38	27	38	3
12:00:00	8	16	29	16	3	0	19	51	2	16	9	2	18	4	0	33	29	5	5	5	42	0	102	18	53	0	23	1	10	0	42	4	12	43	37	14	9	79	47	10	26	53	10	30	21	36	14	40	3
12:30:00	0	7	36	0	8	0	10	5	13	21	3	3	1	8	1	13	6	11	13	2	16	0	16	15	38	4	24	0	3	1	18	3	1	30	28	12	2	73	45	53	47	30	12	29	10	31	13	29	3
13:00:00	21	6	12	0	4	0	10	2	0	0	0	0	0	7	3	38	0	0	0	0	15	4	8	18	33	0	12	0	0	3	12	0	0	19	26	13	0	52	28	74	33	21	1	12	0	8	2	8	3
13:30:00	75	4	1	0	0	6	2	4	0	0	8	0	0	2	0	10	9	0	0	1	2	0	12	2	18	0	8	0	0	0	16	9	0	2	7	4	0	44	18	67	13	3	11	7	0	0	2	4	3
14:00:00	14	14	0	0	43	0	0	0	0	0	5	5	0	0	0	0	11	0	0	1	6	0	0	5	5	9	2	2	0	0	1	1	0	0	1	0	4	41	6	9	7	1	1	9	0	5	0	3	3
14:30:00	7	2	12	0	23	0	0	0	0	0	4	0	0	4	0	0	18	0	0	0	4	0	12	1	9	0	2	58	0	31	24	0	0	1	2	9	0	19	5	42	2	0	11	0	0	1	0	35	3
15:00:00	19	0	8	0	14	0	0	0	0	0	0	0	0	2	0	0	9	0	0	0	9	0	9	0	5	0	0	0	0	21	7	1	0	10	3	0	0	14	0	56	20	0	7	0	0	0	1	22	3
15:30:00	11	0	0	0	27	0	0	0	0	0	0	0	0	13	0	0	26	31	62	54	54	1	43	22	44	83	54	27	42	56	99	57	1	9	9	0	0	8	0	60	8	0	48	1	0	0	4	2	3
16:00:00	1	0	0	0	41	0	8	0	0	0	1	0	0	1	0	8	14	0	0	0	0	0	1	0	2	0	0	0	0	1	22	0	11	0	2	0	14	3	0	64	1	11	0	3	0	5	39	16	3
16:30:00	0	5	0	0	8	0	33	0	0	0	1	0	16	14	0	19	10	0	0	0	1	3	0	0	0	1	0	0	0	0	19	2	29	3	0	0	1	4	0	13	49	0	0	0	0	0	11	8	3
17:00:00	0	10	0	0	12	0	14	0	0	0	8	0	34	30	0	0	25	0	37	1	17	0	2	16	0	13	22	0	0	13	42	31	11	0	6	0	7	6	0	44	1	0	8	2	0	0	16	4	3
17:30:00	0	27	0	0	4	4	13	0	0	12	10	0	24	5	0	0	53	0	59	0	45	37	36	14	2	9	25	0	0	0	15	25	11	0	4	0	20	15	1	39	5	4	2	2	0	0	28	4	3
18:00:00	0	22	31	0	73	0	38	1	0	0	20	0	12	10	0	6	21	1	35	0	53	22	21	9	29	20	11	1	7	29	12	20	31	2	23	0	8	31	0	48	6	4	18	2	0	20	8	9	3
18:30:00	0	22	41	1	20	48	58	7	2	28	43	1	27	13	0	7	32	0	19	0	31	10	17	19	36	3	11	2	16	8	14	33	39	38	22	0	18	33	36	47	24	18	16	26	0	41	31	29	3
19:00:00	17	33	30	0	32	33	45	13	18	117	22	15	37	19	10	9	17	1	18	0	31	16	28	3	34	8	0	8	4	17	14	21	28	30	6	1	18	30	20	42	22	5	34	10	0	41	43	16	3
19:30:00	13	38	49	11	40	32	68	57	52	105	42	28	35	16	51	54	32	0	41	0	20	29	18	16	45	10	12	8	10	25	15	39	37	31	16	35	32	53	6	48	25	11	25	28	0	31	22	26	3
20:00:00	19	57	58	23	61	48	73	54	64	25	50	33	62	26	58	43	40	8	36	7	44	48	32	10	26	23	23	35	33	57	55	38	48	71	31	23	19	61	42	55	39	23	25	26	41	39	35	41	3
20:30:00	73	62	98	76	104	96	119	142	80	60	87	80	95	77	112	70	81	45	69	90	51	103	65	70	96	58	88	108	84	67	63	83	87	87	84	59	61	120	96	97	57	67	78	78	43	105	55	83
21:00:00	53	59	6	61	47	58	69	146	52	107	61	59	81	115	78	25	54	24	67	42	35	74	42	36	92	31	70	101	62	49	45	67	32	78	28	43	48	114	83	49	36	45	95	55	13	70	109	85
21:30:00	27	42	10	34	7	32	24	1	30	124	36	49	68	69	16	17	39	94	26	14	16	30	11	3	61	93	32	31	49	34	23	41	6	6	12	31	30	55	44	23	16	28	42	28	20	26	55	2
22:00:00	8	8	5	29	1	0	14	0	10	31	15	45	42	13	0	1	2	2	11	0	0	10	3	0	39	1	3	0	13	17	12	50	0	24	6	10	0	8	12	28	0	26	30	6	46	10	27	0
22:30:00	2	0	0	23	0	0	84	0	0	0	6	28	45	0	0	0	10	3	1	0	2	0	1	0	24	23	0	0	0	1	19	38	0	21	11	0	0	15	1	9	8	11	1	2	1	16	2	3
23:00:00	0	0	0	0	0	0	42	7	3	0	3	1	44	2	0	0	13	0	0	0	0	0	0	0	0	28	0	0	0	0	9	35	14	6	20	69	0	8	9	35	3	1	0	1	3	23	24	0
23:30:00	11	17	0	0	0	0	0	1	2	0	2	2	49	0	0	0	2	14	24	0	0	0	0	0	0	24	0	0	6	80	10	53	35	26	21	7	0	0	5	102	0	0	0	34	35	6	70	0
00:00:00	24	30	0	0	0	1	0	4	23	0	0	0	18	0	0	0	5	8	0	7	0	25	13	48	0	29	0	2	29	35	0	34	21	29	8	0	0	7	0	24	0	0	0	15	0	52	12	0
00:30:00	0	0	24	0	0	4	0	2	31	0	0	0	50	0	0	0	33	16	56	19	0	12	22	24	0	0	0	0	15	0	0	17	0	7	36	7	0	10	1	9	0	0	2	0	0	54	7	0
01:00:00	0	28	0	0	0	0	0	1	10	0	0	0	21	0	0	0	41	12	37	0	29	0	0	0	60	18	0	1	6	1	34	27	2	30	39	13	10	8	0	51	0	0	10	37	0	24	47	0
01:30:00	0	25	0	0	0	0	0	1	36	0	0	54	45	32	0	0	52	0	0	12	0	0	0	0	57	0	43	0	27	12	75	15	0	54	23	2	41	33	15	71	0	0	3	11	0	43	35	0
02:00:00	0	2	35	0	0	0	0	24	19	0	26	2	37	44	0	0	30	32	33	0	3	0	0	0	41	17	2	0	19	0	27	45	19	36	8	31	20	61	20	38	7	0	40	47	0	57	0	0
02:30:00	0	7	8	0	0	0	8	0	0	0	5	0	53	28	0	0	14	0	18	0	15	0	0	0	1	13	3	0	0	0	10	23	0	17	8	23	0	43	48	21	35	4	47	21	0	45	0	0
03:00:00	35	13	2	0	0	0	69	0	0	0	2	0	4	0	0	28	40	0	0	4	0	0	0	0	0	0	0	0	25	0	0	17	29	0	10	2	3	18	27	60	2	3	33	0	32	8	16	26
03:30:00	27	31	7	0	0	0	53	3	10	0	0	7	0	6	0	32	0	1	0	0	35	0	0	36	0	0	0	0	19	0	0	6	7	0	21	0	46	57	12	23	0	0	0	34	14	0	13	19
04:00:00	0	0	0	0	0	0	0	8	6	0	0	36	0	0	0	12	6	0	0	0	24	34	0	31	54	0	28	0	0	0	0	25	11	0	17	0	12	9	10	10	1	0	0	9	0	0	0	28
04:30:00	0	0	0	0	0	0	0	4	0	0	0	30	0	0	0	0	31	0	72	0	0	2	0	0	7	18	40	0	0	0	0	102	0	13	12	0	0	0	211	18	17	0	0	0	0	0	0	12
05:00:00	20	0	43	0	0	0	0	3	10	0	0	0	0	0	0	0	7	7	36	0	0	0	18	0	0	39	11	0	0	0	60	4	15	35	0	0	0	17	20	4	22	18	11	37	0	0	3	36
05:30:00	50	23	38	0	0	0	0	0	0	0	0	24	0	0	0	0	10	0	2	0	0	0	19	0	0	13	0	0	32	0	49	0	6	0	0	62	0	7	33	0	0	25	27	5	0	0	69	17
06:00:00	0	0	12	0	0	0	0	39	0	0	23	40	0	0	0	0	0	23	0	24	0	42	20	0	0	7	0	0	36	24	29	0	5	16	0	35	10	6	6	0	0	5	88	32	0	15	12	0
06:30:00	0	20	0	0	0	0	0	0	14	0	21	6	0	5	36	0	0	0	34	0	0	73	0	0	0	0	12	19	0	4	63	50	5	1	0	35	27	18	16	0	31	20	5	23	7	66	95	0
07:00:00	16	47	0	0	0	0	0	0	0	51	20	0	0	37	0	0	22	3	21	0	41	28	0	0	0	0	26	0	0	0	0	39	0	0	0	6	0	24	32	0	14	39	19	23	26	3	4	19
07:30:00	78	38	0	0	1	0	0	0	0	0	18	28	0	0	0	0	0	53	17	10	16	0	0	10	0	24	10	102	0	0	0	49	20	0	0	25	0	22	1	0	20	0	38	38	0	0	0	0
08:00:00	23	8	16	0	45	0	0	24	48	0	4	58	0	1	0	33	0	38	2	6	5	64	0	12	31	5	0	8	24	0	0	24	0	3	12	9	0	30	43	38	24	15	13	28	0	1	35	24
[truncated: 55 more columns]

## Sheet: Fig 1 S1 D (WT strain 4)
FED	M8-11.10															M20-11.11																M35-11.12												+sucrose	+sucrose SEM	+sucrose survival		ST	M8-11.10-ST
20:30:00	70	94	78	62	52	93	68	71	71	80	66	81	57	64	91	34	61	60	67	73	44	67	36	72	68	65	56	51	47	51	27	46	68	65	84	75	67	75	58	55	91	39		64.2857	2.45406	1		20:30:00	43
21:00:00	53	8	34	1	45	97	56	17	44	39	67	19	71	63	57	8	35	42	65	60	32	72	68	33	41	33	19	49	43	45	30	2	35	33	25	58	28	3	18	11	79	33		39.7857	3.48825	1		21:00:00	4
21:30:00	0	0	13	0	27	89	6	5	39	0	3	0	63	18	0	0	1	66	42	3	41	19	24	13	51	31	0	18	28	7	26	12	8	5	12	40	7	0	5	0	32	10		18.1905	3.25927	1		21:30:00	1
22:00:00	0	0	2	0	0	35	0	3	40	0	0	0	20	0	0	0	0	0	0	4	32	0	3	2	29	14	0	1	9	3	8	0	0	0	9	22	8	0	1	0	0	3		5.90476	1.64462	1		22:00:00	2
22:30:00	0	0	0	0	0	11	0	1	0	23	0	0	25	0	0	0	0	0	0	0	4	0	0	0	5	2	0	4	3	0	0	0	39	0	1	6	9	0	0	0	9	14		3.71429	1.24813	1		22:30:00	0
23:00:00	0	0	0	0	0	12	0	19	0	0	0	0	7	0	0	0	0	0	0	0	0	0	0	0	0	1	0	0	0	0	0	0	0	0	12	0	0	49	16	0	0	2		2.80952	1.32616	1		23:00:00	3
23:30:00	0	0	1	0	0	31	8	62	0	0	0	0	2	0	0	0	0	0	0	0	12	0	0	0	0	15	0	0	0	0	0	0	0	0	7	0	0	0	0	0	0	4		3.38095	1.67441	1		23:30:00	0
00:00:00	0	0	0	0	0	26	19	9	25	0	0	0	43	0	0	0	0	0	0	0	2	0	0	0	0	2	0	0	0	0	0	0	0	0	3	0	0	3	18	0	0	17		3.97619	1.43924	1		00:00:00	13
00:30:00	0	0	0	0	0	26	3	29	3	0	0	0	2	0	0	0	0	0	0	0	0	2	0	0	0	12	0	0	0	0	0	0	0	0	5	0	0	0	7	0	1	22		2.66667	1.06342	1		00:30:00	31
01:00:00	15	0	1	0	0	30	7	13	37	0	0	0	6	0	0	0	0	0	0	0	16	0	0	0	11	4	0	0	0	0	0	0	0	0	14	0	0	0	0	0	17	4		4.16667	1.30082	1		01:00:00	0
01:30:00	5	0	0	0	0	0	12	17	13	0	0	0	14	0	0	0	0	0	0	0	0	0	0	0	42	19	0	0	0	0	0	0	0	0	19	0	0	0	0	0	0	6		3.5	1.28208	1		01:30:00	0
02:00:00	0	0	0	0	0	48	0	20	0	0	0	0	7	0	0	0	0	0	0	0	16	2	0	0	2	0	4	0	0	0	0	0	0	0	0	0	0	0	30	0	0	1		3.09524	1.43209	1		02:00:00	0
02:30:00	13	0	0	0	0	23	0	38	0	0	0	0	0	0	0	0	0	13	0	0	9	3	0	0	10	0	0	0	0	0	0	0	0	0	41	0	0	0	1	0	0	0		3.59524	1.45392	1		02:30:00	0
03:00:00	6	0	0	0	0	56	0	33	0	0	0	0	0	15	0	0	0	0	0	0	1	16	0	0	4	0	0	0	0	0	0	0	0	0	0	0	0	0	0	0	3	0		3.19048	1.58764	1		03:00:00	0
03:30:00	0	0	0	0	0	38	0	0	0	0	0	0	1	0	0	0	0	13	0	0	0	3	0	0	0	0	0	0	0	0	0	0	0	0	0	0	0	0	0	0	0	0		1.30952	0.949043	1		03:30:00	0
04:00:00	0	0	0	0	0	0	44	7	0	0	0	0	0	0	64	0	0	3	0	0	0	10	0	0	0	0	0	0	0	0	0	0	0	3	8	0	0	0	47	0	25	0		5.02381	2.16038	1		04:00:00	0
04:30:00	0	0	0	0	11	0	39	42	0	0	0	0	37	0	31	0	0	0	0	0	0	35	0	0	0	0	0	0	0	0	0	21	0	0	6	0	0	0	5	0	0	0		5.40476	1.90301	1		04:30:00	0
05:00:00	0	0	0	0	4	75	0	0	0	0	0	1	46	0	0	0	0	5	0	0	0	5	0	0	0	0	4	0	0	0	0	31	11	0	5	0	0	63	0	0	19	0		6.40476	2.58852	1		05:00:00	0
05:30:00	0	72	0	0	1	41	1	0	0	0	0	0	0	0	0	0	0	6	0	0	10	7	0	0	0	0	49	0	0	0	0	0	35	0	4	0	0	0	0	0	1	16		5.78571	2.35436	1		05:30:00	0
06:00:00	0	0	0	0	24	22	7	20	0	43	0	10	0	0	0	0	0	15	0	0	0	11	0	0	11	0	0	0	0	0	0	12	0	0	5	0	0	0	0	0	0	74		6.04762	2.15997	1		06:00:00	0
06:30:00	0	0	0	0	1	52	34	18	0	6	0	2	0	0	0	0	0	0	0	0	6	29	0	55	45	0	0	0	41	0	0	0	0	0	10	0	0	0	0	0	6	5		7.38095	2.37411	1		06:30:00	0
07:00:00	0	0	0	0	1	65	8	0	0	0	4	3	0	0	0	14	0	41	0	79	10	38	0	72	31	17	0	0	29	0	0	0	0	0	3	0	0	0	0	33	1	0		10.6905	3.19252	1		07:00:00	0
07:30:00	0	0	0	3	5	23	0	18	46	0	0	0	64	0	0	18	0	0	0	17	0	49	7	0	36	42	0	0	8	64	0	0	12	31	10	49	0	0	0	46	16	0		13.4286	3.02777	1		07:30:00	0
08:00:00	0	0	0	48	16	40	23	15	61	0	0	0	26	40	0	0	11	45	0	0	2	5	23	1	63	21	0	1	1	40	0	17	14	41	10	67	0	62	8	0	0	0		16.6905	3.28575	1		08:00:00	0
08:30:00	67	75	82	33	42	38	43	39	30	48	65	85	35	55	75	37	29	20	55	69	16	49	34	61	33	22	43	57	28	51	39	37	40	81	49	46	46	52	20	47	63	23		46.6429	2.76254	1		08:30:00	70
09:00:00	60	64	51	21	50	48	40	48	41	25	63	38	15	47	19	30	22	9	26	32	27	48	34	31	30	32	21	26	35	41	21	19	37	30	37	32	26	26	16	9	17	59		33.4048	2.19255	1		09:00:00	36
09:30:00	43	53	51	38	39	39	26	25	90	20	53	19	38	41	23	26	27	12	31	23	31	16	21	14	18	61	23	16	20	22	36	16	18	17	16	47	17	13	2	16	17	45		29.0238	2.55701	1		09:30:00	17
10:00:00	50	80	53	19	31	23	2	39	22	25	51	12	28	7	19	0	15	6	37	9	7	0	20	20	28	34	36	8	31	31	44	17	11	8	21	23	13	1	0	6	11	36		22.2381	2.65601	1		10:00:00	12
10:30:00	34	68	44	9	21	37	2	67	14	27	41	6	16	10	15	22	13	0	15	29	6	6	20	20	27	19	19	11	11	34	12	8	12	2	12	42	19	53	7	5	10	17		20.5238	2.52381	1		10:30:00	2
11:00:00	36	43	33	24	14	15	2	14	11	28	36	3	4	14	0	3	14	0	17	14	0	0	48	4	27	48	27	7	10	15	30	20	11	7	4	13	11	7	0	0	2	24		15.2381	2.10795	1		11:00:00	2
11:30:00	32	24	19	23	9	0	0	18	9	20	31	5	12	12	0	11	13	0	5	0	9	0	18	1	19	15	13	19	18	13	23	11	2	2	9	32	0	0	0	0	4	5		10.8571	1.49197	1		11:30:00	2
12:00:00	2	8	29	22	0	13	0	17	4	11	19	5	5	0	26	1	0	0	4	0	0	0	8	0	11	15	8	5	12	12	20	12	0	0	15	10	17	0	2	0	0	11		7.71429	1.24347	1		12:00:00	3
12:30:00	1	12	5	27	0	6	15	10	13	4	21	11	6	0	18	3	0	0	13	0	0	0	10	0	40	6	8	19	18	4	23	15	2	0	1	0	0	0	0	0	0	28		8.07143	1.49579	1		12:30:00	0
13:00:00	1	0	10	20	0	5	2	15	0	4	13	0	5	40	13	2	0	0	10	0	0	0	6	0	4	0	0	2	0	8	28	5	0	0	7	33	0	0	0	0	0	8		5.7381	1.4431	1		13:00:00	0
13:30:00	1	37	0	10	0	0	0	44	19	0	6	0	7	3	0	1	0	0	1	0	0	0	6	0	3	0	0	6	0	4	20	0	0	0	11	1	0	0	0	0	0	27		4.92857	1.56002	1		13:30:00	3
14:00:00	0	0	0	14	0	0	0	12	0	0	0	0	15	0	0	1	0	0	0	0	0	0	0	0	2	0	0	0	0	0	31	0	0	0	7	6	0	0	0	0	0	13		2.40476	0.946329	1		14:00:00	0
14:30:00	0	0	1	40	7	0	0	8	31	0	0	5	18	0	0	0	0	0	0	0	0	0	0	0	1	0	0	0	0	0	9	0	0	0	2	53	0	0	0	0	0	2		4.21429	1.73391	1		14:30:00	0
15:00:00	1	0	6	9	24	0	0	0	9	0	0	0	22	1	0	1	0	0	0	0	0	0	0	0	0	0	0	0	0	0	8	0	0	0	13	0	0	0	0	0	0	20		2.71429	0.959267	1		15:00:00	0
15:30:00	0	0	0	0	3	0	2	22	0	0	0	0	28	0	0	51	25	0	0	6	19	39	20	43	56	57	27	32	1	33	19	0	0	0	7	0	0	0	0	0	0	20		12.1429	2.69632	1		15:30:00	0
16:00:00	0	0	0	0	2	0	0	25	0	0	0	0	1	0	0	0	1	0	0	0	0	0	3	0	0	1	13	0	1	4	12	0	0	0	4	0	0	0	0	0	0	0		1.59524	0.714915	1		16:00:00	0
16:30:00	0	0	0	0	0	2	0	19	0	1	0	0	3	0	0	0	0	0	0	0	1	0	0	0	0	0	0	0	0	0	7	1	0	0	7	0	0	0	0	0	0	0		0.97619	0.502593	1		16:30:00	0
17:00:00	0	0	56	28	31	0	0	23	0	43	50	0	65	0	0	17	0	17	20	29	21	11	9	27	35	18	15	35	19	23	26	9	6	0	4	0	0	0	0	0	0	2		15.2143	2.65682	1		17:00:00	0
17:30:00	0	0	24	11	0	6	0	16	0	0	10	0	15	1	0	2	0	0	22	27	2	3	8	0	4	6	3	17	27	7	9	32	5	0	7	0	0	0	0	0	0	0		6.28571	1.37519	1		17:30:00	0
18:00:00	0	0	7	12	0	1	10	2	0	6	0	1	42	29	0	38	0	37	37	22	3	5	12	0	2	16	13	37	20	2	17	0	6	0	4	7	0	0	0	0	15	0		9.59524	1.97753	1		18:00:00	1
18:30:00	5	1	13	0	0	0	12	72	4	13	0	4	8	2	0	4	2	0	21	15	4	1	12	19	28	29	18	5	6	0	24	4	17	10	22	48	0	0	0	0	0	0		10.0714	2.22419	1		18:30:00	15
19:00:00	17	3	11	6	1	0	5	16	0	21	8	7	12	20	36	42	8	0	7	23	2	2	7	10	21	17	10	7	10	18	13	7	27	0	14	11	0	0	9	6	19	11		11.0476	1.47253	1		19:00:00	0
19:30:00	35	31	30	11	8	27	16	17	26	10	24	16	4	24	6	14	18	7	35	2	8	8	22	23	15	8	17	19	14	17	20	39	31	26	27	28	1	42	17	28	42	37		20.2381	1.7012	1		19:30:00	6
20:00:00	24	18	28	20	15	22	27	28	12	14	34	20	15	16	24	21	33	11	21	20	12	11	0	28	12	13	9	18	21	61	16	18	11	15	34	11	15	9	6	17	5	14		18.5476	1.57772	1		20:00:00	15
20:30:00	101	77	89	42	75	75	76	72	70	63	95	62	69	66	81	30	47	43	64	49	39	46	56	95	60	42	50	68	68	64	40	44	54	55	70	62	78	48	46	23	68	73		61.7857	2.72374	1		20:30:00	98
21:00:00	51	18	26	22	48	27	33	0	58	48	9	11	67	38	30	3	4	12	60	3	21	3	38	15	35	15	15	19	30	15	35	0	10	15	19	45	46	12	8	0	2	43		24.0238	2.83509	1		21:00:00	53
21:30:00	0	0	9	0	9	18	1	3	19	38	4	0	6	0	5	0	0	0	3	6	4	0	14	0	8	2	5	9	19	15	1	0	17	8	14	4	9	5	31	0	4	29		7.59524	1.41793	1		21:30:00	16
22:00:00	0	5	0	0	3	6	0	2	2	27	0	0	1	0	0	0	0	0	0	23	0	0	0	0	6	0	0	0	4	0	0	0	0	2	17	0	9	18	2	0	0	12		3.30952	1.01527	1		22:00:00	0
22:30:00	0	0	0	0	0	14	0	10	0	5	0	0	3	0	0	0	0	0	0	0	0	0	7	0	4	0	0	0	15	0	0	0	0	0	2	0	0	0	4	0	0	14		1.85714	0.63353	1		22:30:00	0
23:00:00	0	0	0	0	0	3	0	0	0	12	0	0	1	0	0	0	0	0	0	0	0	0	0	0	0	0	0	0	6	13	0	0	12	0	0	0	23	13	2	0	0	16		2.40476	0.841063	1		23:00:00	0
23:30:00	0	0	0	0	0	33	0	0	0	0	0	0	0	0	0	0	0	0	0	0	34	0	0	0	0	0	0	10	14	35	0	0	24	0	12	0	0	0	0	0	0	7		4.02381	1.49622	1		23:30:00	1
00:00:00	0	0	0	0	0	17	0	0	0	2	0	0	1	0	0	0	0	0	0	0	0	8	0	0	13	0	0	5	0	9	0	0	2	5	14	0	0	0	30	0	43	2		3.59524	1.33481	1		00:00:00	0
00:30:00	0	0	0	0	1	7	25	0	0	0	0	0	0	0	32	0	0	0	0	0	0	0	20	0	19	21	0	0	35	3	0	0	0	4	10	0	21	0	13	0	8	40		6.16667	1.69165	1		00:30:00	0
01:00:00	0	0	0	0	0	2	0	28	1	0	0	0	0	0	0	0	0	0	0	0	0	13	0	0	17	14	0	5	9	0	44	0	2	3	7	0	39	0	2	0	0	2		4.47619	1.56813	1		01:00:00	0
01:30:00	0	0	0	0	0	34	0	56	0	0	0	0	11	0	0	0	0	0	0	15	11	38	0	0	6	0	0	0	23	0	7	14	0	0	3	0	0	0	2	0	0	35		6.07143	1.97293	1		01:30:00	0
02:00:00	0	41	0	0	0	12	0	15	0	0	0	0	9	0	0	0	0	4	0	29	11	0	5	0	9	16	0	1	8	34	0	16	27	0	6	0	0	0	14	0	25	20		7.19048	1.66303	1		02:00:00	0
02:30:00	0	17	0	0	23	0	0	42	34	0	0	1	25	0	3	0	0	0	0	0	0	0	38	0	0	0	0	0	10	20	0	5	7	0	5	0	4	0	7	0	0	20		6.21429	1.74758	1		02:30:00	0
03:00:00	0	0	0	0	11	39	0	7	67	0	0	40	21	0	0	0	0	0	0	0	0	0	27	0	16	22	0	0	10	0	0	0	0	26	12	0	7	0	0	0	9	11		7.7381	2.20154	1		03:00:00	0
03:30:00	0	0	0	0	0	49	33	12	2	0	0	0	36	0	0	0	30	0	0	0	0	0	0	33	3	0	0	0	0	0	0	0	0	6	0	0	0	26	4	0	0	8		5.7619	1.91722	1		03:30:00	0
04:00:00	0	0	0	0	21	21	0	10	18	0	0	0	1	0	0	0	7	0	0	0	38	0	0	69	28	1	0	0	36	0	0	0	20	5	8	0	0	18	4	0	0	18		7.69048	2.1969	1		04:00:00	0
04:30:00	0	0	0	0	2	18	0	18	2	0	0	0	1	0	0	28	10	0	0	5	4	0	0	56	5	28	0	0	22	37	16	35	12	3	2	0	0	50	0	0	1	0		8.45238	2.22414	1		04:30:00	0
05:00:00	0	0	0	0	0	13	0	0	0	0	0	0	23	0	0	4	0	0	0	14	38	0	0	1	25	11	0	0	13	13	12	0	0	0	18	0	0	15	5	0	0	8		5.07143	1.35052	1		05:00:00	0
05:30:00	0	51	0	0	0	0	0	23	31	0	20	0	9	0	0	2	0	0	0	0	3	0	1	0	0	0	0	0	0	0	1	0	16	0	0	17	0	2	0	0	0	0		4.19048	1.59821	1		05:30:00	0
06:00:00	0	4	0	17	0	27	35	5	35	0	0	0	1	15	0	0	0	0	0	0	23	0	0	13	18	3	19	0	11	5	0	0	0	0	12	50	0	65	0	0	0	0		8.52381	2.29761	1		06:00:00	0
06:30:00	0	38	0	64	0	9	5	5	0	38	0	31	30	41	1	0	8	0	0	0	40	2	0	1	27	10	32	0	0	0	0	0	14	79	0	11	0	14	0	12	40	0		13.1429	2.99275	1		06:30:00	0
07:00:00	0	0	0	11	0	23	0	0	0	0	15	11	18	56	0	0	0	12	25	14	0	34	11	42	59	25	8	23	22	9	6	25	16	7	8	0	0	0	0	0	0	41		12.4048	2.40669	1		07:00:00	0
07:30:00	0	1	0	1	0	35	26	7	34	0	57	0	5	14	0	2	11	0	17	7	0	17	0	0	43	56	18	0	0	0	37	0	7	6	6	0	0	0	2	19	13	24		11.0714	2.42073	1		07:30:00	2
08:00:00	19	33	0	0	0	38	0	11	16	23	5	4	4	1	34	0	53	0	0	0	12	28	22	32	34	14	2	0	0	0	10	9	0	16	11	38	30	22	0	0	19	10		13.0952	2.1901	1		08:00:00	29
08:30:00	66	45	61	46	46	35	33	34	57	32	47	45	14	39	26	28	33	30	44	35	26	12	29	50	24	17	24	45	13	40	18	31	35	22	35	26	30	38	18	21	27	15		33.1429	1.99552	1		08:30:00	48
09:00:00	42	38	23	22	34	32	28	23	22	48	44	17	14	26	32	18	27	14	26	12	25	12	24	32	22	8	17	9	6	13	25	29	21	3	20	25	31	19	4	18	21	18		22.4762	1.58654	1		09:00:00	43
09:30:00	29	40	29	18	24	25	12	19	20	38	42	14	18	14	20	23	28	17	23	4	13	4	25	19	14	7	17	25	11	21	10	16	15	9	16	27	25	17	6	12	12	16		18.9048	1.36439	1		09:30:00	26
10:00:00	41	38	43	18	26	34	6	21	47	26	36	8	27	12	19	15	17	11	21	40	7	0	12	10	19	8	15	11	4	15	14	16	14	4	14	46	33	20	10	14	10	20		19.5714	1.90364	1		10:00:00	16
10:30:00	38	41	24	40	25	35	2	8	35	63	24	4	7	3	17	11	12	8	26	22	14	0	9	15	8	7	20	4	2	16	15	16	6	3	6	39	12	9	0	7	16	8		16.119	2.1414	1		10:30:00	35
11:00:00	39	21	15	21	15	23	12	17	29	33	27	2	53	3	14	2	15	7	24	0	12	0	4	7	13	9	10	16	0	12	19	11	0	0	4	10	11	10	2	0	10	1		12.6905	1.78147	1		11:00:00	16
11:30:00	6	18	3	23	4	26	12	11	11	34	20	2	8	2	24	0	8	2	13	0	4	0	0	5	3	14	19	19	10	6	9	3	8	0	10	23	4	6	0	0	26	7		9.59524	1.3662	1		11:30:00	8
12:00:00	25	20	22	20	2	33	0	13	28	27	12	8	4	3	14	13	2	3	6	0	7	0	0	23	0	4	9	3	0	0	2	6	6	0	5	27	3	0	2	0	7	3		8.61905	1.48471	1		12:00:00	10
12:30:00	2	17	7	11	3	7	9	4	6	10	62	6	4	0	21	6	8	0	4	0	6	0	0	3	2	17	0	0	0	13	0	2	0	0	13	17	9	0	3	0	4	13		6.88095	1.60979	1		12:30:00	6
13:00:00	0	4	0	4	0	4	0	18	0	13	6	31	2	0	6	4	1	0	1	0	3	0	0	0	0	0	7	14	0	5	0	14	0	0	4	8	0	0	0	0	2	5		3.71429	0.964097	1		13:00:00	4
13:30:00	3	0	0	0	0	32	8	16	0	3	0	9	10	0	6	9	0	0	15	0	8	0	0	32	0	0	0	18	0	0	0	3	0	0	6	0	0	0	0	0	4	12		4.61905	1.23016	1		13:30:00	1
14:00:00	0	0	5	0	0	13	0	0	6	1	0	23	0	0	0	13	0	0	1	0	0	0	0	0	0	0	0	17	0	1	0	25	0	0	10	0	0	0	0	0	6	8		3.07143	0.978511	1		14:00:00	1
14:30:00	0	0	46	0	0	2	0	11	1	0	19	47	0	0	0	0	0	0	0	0	0	0	0	1	0	0	0	0	0	0	0	0	38	0	42	0	0	0	0	0	0	0		4.92857	2.01631	1		14:30:00	1
15:00:00	0	0	23	0	0	0	0	0	1	1	0	35	13	0	5	9	0	0	0	0	0	0	0	0	0	0	0	0	0	0	0	9	0	0	14	0	0	0	0	0	0	0		2.61905	1.08305	1		15:00:00	0
15:30:00	57	48	61	49	50	56	66	47	27	43	63	40	91	53	44	0	0	0	0	0	0	0	0	0	0	0	0	0	0	0	0	0	0	0	34	0	11	0	15	0	9	0		20.5714	4.09373	1		15:30:00	38
16:00:00	0	24	4	0	0	8	0	14	0	11	4	5	0	0	4	5	0	0	0	0	0	0	0	1	0	0	0	0	0	0	0	0	0	0	5	0	8	0	0	0	0	0		2.21429	0.73847	1		16:00:00	0
16:30:00	4	2	0	0	0	0	0	0	0	2	29	0	0	0	0	7	0	0	0	0	0	0	1	19	0	0	0	0	0	0	0	0	0	0	3	0	17	0	0	0	0	0		2	0.9036	1		16:30:00	1
17:00:00	84	39	37	29	28	28	30	21	26	28	60	14	19	25	36	4	2	0	0	0	0	0	10	14	0	0	0	0	0	0	2	0	0	0	49	0	0	0	0	0	0	0		13.9286	3.02974	1		17:00:00	27
17:30:00	14	31	29	0	14	5	3	14	0	11	4	1	0	6	6	22	17	6	7	0	0	0	0	19	0	0	5	0	0	0	27	0	0	0	35	0	0	0	0	0	0	0		6.57143	1.52758	1		17:30:00	0
18:00:00	10	17	20	0	20	11	18	21	4	21	28	13	5	17	23	9	10	0	0	14	0	0	1	28	3	5	25	1	0	24	7	4	0	0	19	0	0	0	0	0	0	0		9	1.4757	1		18:00:00	7
18:30:00	9	9	1	0	0	0	0	17	2	8	11	0	5	5	20	18	32	0	5	31	13	12	2	16	30	11	18	18	6	16	10	12	0	0	28	1	0	0	8	0	0	1		8.92857	1.46678	1		18:30:00	0
19:00:00	17	4	7	0	0	0	1	17	0	21	9	0	9	4	29	16	9	3	40	28	10	8	11	16	34	21	22	20	28	19	9	19	18	13	32	16	0	0	0	10	0	9		12.5952	1.65807	1		19:00:00	14
19:30:00	15	22	7	0	0	0	18	15	3	24	16	11	8	15	23	17	31	17	52	29	4	12	17	34	17	15	43	14	9	38	37	22	23	36	34	30	0	19	0	26	30	17		19.0476	1.95506	1		19:30:00	8
20:00:00	28	32	12	11	13	22	25	39	38	30	26	13	70	12	24	27	29	11	14	21	8	8	14	28	24	15	22	19	12	23	16	39	13	18	42	26	1	48	7	22	13	16		22.1667	1.98306	1		20:00:00	10
20:30:00	82	78	70	24	69	61	62	47	46	82	95	66	66	30	91	51	31	41	82	70	35	34	48	63	61	36	46	68	41	57	38	71	57	51	79	79	87	42	61	35	65	62		58.5714	2.83748	1		20:30:00	99
21:00:00	32	65	24	16	14	42	4	22	49	58	11	10	48	8	30	28	5	2	60	4	67	0	1	14	45	42	18	14	18	7	9	23	5	14	40	40	27	23	14	10	26	42		24.5476	2.88256	1		21:00:00	91
21:30:00	1	37	45	14	2	28	3	2	37	29	2	4	9	0	0	1	0	0	6	2	6	5	3	2	18	79	0	15	2	3	4	0	0	6	8	0	2	13	7	0	0	26		10.0238	2.45931	1		21:30:00	102
22:00:00	0	18	14	3	2	10	0	7	0	82	12	0	29	0	0	5	0	0	0	0	0	0	0	0	26	8	0	7	14	10	6	0	0	7	11	0	5	0	1	0	1	11		6.88095	2.13733	1		22:00:00	81
22:30:00	0	27	2	5	7	54	0	1	35	0	7	0	31	19	0	0	0	3	0	0	0	6	0	0	12	0	0	4	0	1	2	0	0	0	8	0	18	0	1	0	0	4		5.88095	1.7843	1		22:30:00	87
23:00:00	0	1	0	8	44	36	0	26	3	0	3	0	12	24	0	13	0	0	0	0	0	0	0	0	16	13	0	0	0	0	0	0	0	0	6	0	10	0	6	0	0	14		5.59524	1.59086	1		23:00:00	60
23:30:00	1	20	2	0	16	12	0	13	8	0	0	18	2	16	0	19	0	0	0	0	0	49	0	103	4	4	0	0	17	0	0	0	0	0	14	0	0	0	6	0	0	11		7.97619	2.74708	1		23:30:00	48
00:00:00	0	17	0	42	6	15	23	6	18	0	0	18	0	16	0	12	0	0	0	1	0	52	0	0	0	14	0	10	0	0	26	0	0	0	10	0	0	0	31	0	26	78		10.0238	2.55087	1		00:00:00	46
00:30:00	0	12	0	36	0	18	0	13	5	0	0	0	49	39	0	24	0	0	0	0	0	10	0	0	50	0	5	11	0	0	8	3	26	0	0	0	0	0	14	0	0	17		8.09524	2.11235	1		00:30:00	38
01:00:00	1	2	0	1	2	21	0	10	0	0	0	0	0	57	0	0	32	0	0	12	0	6	23	0	4	0	0	0	0	0	0	0	0	12	8	0	0	0	12	0	0	38		5.7381	1.86073	1		01:00:00	45
01:30:00	0	19	0	33	0	33	0	63	0	0	0	0	24	36	0	0	6	0	0	33	0	4	17	0	0	0	0	0	0	36	10	0	0	3	19	0	0	0	30	0	0	0		8.71429	2.32226	1		01:30:00	34
02:00:00	0	7	0	6	2	7	3	14	0	0	29	0	22	4	0	0	5	0	0	4	0	23	16	0	38	9	0	0	28	0	16	0	0	0	9	0	0	0	15	0	0	0		6.11905	1.48715	1		02:00:00	24
02:30:00	0	7	0	0	0	10	0	4	0	50	0	0	2	0	0	0	26	0	0	0	52	0	0	0	18	18	2	0	0	0	3	1	0	2	10	0	0	0	10	0	7	0		5.28571	1.83377	1		02:30:00	79
03:00:00	0	0	0	0	0	5	0	15	46	17	4	34	5	1	0	12	24	0	0	1	0	0	0	0	30	0	9	2	0	0	0	0	0	0	2	0	0	0	0	0	0	0		4.92857	1.62422	1		03:00:00	51
03:30:00	0	25	0	0	0	25	0	6	77	0	4	11	23	0	0	1	3	0	0	0	0	0	0	0	10	0	13	11	57	3	7	10	14	31	12	0	0	45	6	0	0	0		9.38095	2.56777	1		03:30:00	45
04:00:00	0	6	0	0	4	17	0	14	18	0	3	9	14	0	0	0	0	0	0	3	0	0	0	0	3	3	0	0	9	0	7	0	8	14	8	0	0	5	0	0	0	29		4.14286	1.01474	1		04:00:00	54
04:30:00	0	0	0	0	0	4	17	1	45	30	21	6	19	0	0	0	3	0	0	0	0	0	0	0	16	29	26	0	7	0	14	13	0	15	2	0	0	0	0	0	0	0		6.38095	1.66677	1		04:30:00	66
05:00:00	0	0	0	0	3	10	0	5	72	0	0	0	32	43	0	0	0	0	0	0	0	0	0	52	28	0	13	18	0	0	4	0	0	0	9	0	0	2	0	0	0	15		7.28571	2.44196	1		05:00:00	40
05:30:00	0	0	0	43	0	10	8	11	0	11	14	0	13	9	0	0	0	0	0	20	0	5	0	0	0	0	3	0	0	0	12	0	0	6	0	0	0	46	12	25	48	0		7.04762	1.93055	1		05:30:00	27
06:00:00	0	25	30	14	7	25	0	2	82	2	0	17	2	3	0	23	0	0	0	0	0	0	0	0	18	20	23	0	26	0	0	0	11	0	5	0	20	0	14	0	0	0		8.78571	2.33479	1		06:00:00	21
06:30:00	3	49	0	0	0	6	0	8	27	18	15	15	2	0	0	0	7	0	21	0	0	0	20	0	12	12	16	0	0	11	7	0	14	16	9	9	38	0	0	0	0	0		7.97619	1.70518	1		06:30:00	24
07:00:00	51	0	0	2	0	14	2	15	49	22	26	0	12	0	0	0	4	9	0	29	6	11	0	18	3	14	2	23	0	18	3	0	1	0	1	31	0	0	0	0	0	0		8.71429	2.01599	1		07:00:00	12
07:30:00	27	13	0	33	0	9	0	25	10	72	0	2	8	0	0	0	4	0	0	14	0	0	29	51	14	1	6	0	0	0	5	0	0	7	25	0	0	0	0	0	0	21		8.95238	2.37411	1		07:30:00	6
08:00:00	38	18	14	4	6	8	13	7	24	24	0	6	63	23	22	4	29	0	21	21	5	18	16	43	24	7	6	19	0	14	10	0	8	8	6	0	0	0	16	15	0	17		13.7381	2.01419	1		08:00:00	1
[truncated: 47 more columns]

## Sheet: Fig 1 S2 A (5%Coconut oil)
FED	M13-6.20																M28-7.1																M11-6.20																M24-7.1
20:30:00	50	45	37	58	67	51	17	64	40	58	75	49	40	30	38	17	5	6	4	0	3	19	0	7	1	16	6	6	3	2	24	44	50	45	37	58	67	51	17	64	40	58	75	49	40	30	38	17	18
21:00:00	79	60	15	53	88	69	27	53	46	69	85	81	36	31	59	26	19	27	4	11	17	48	20	37	12	35	37	4	32	23	40	34	79	60	15	53	88	69	27	53	46	69	85	81	36	31	59	26	43
21:30:00	6	83	14	10	68	53	46	46	39	60	93	81	30	23	68	1	64	45	17	23	12	55	40	32	40	44	10	13	46	40	30	45	6	83	14	10	68	53	46	46	39	60	93	81	30	23	68	1	41
22:00:00	0	48	0	0	60	14	26	20	70	55	60	44	13	5	43	2	4	0	0	0	0	51	0	0	2	27	0	5	8	3	0	7	0	48	0	0	60	14	26	20	70	55	60	44	13	5	43	2	0
22:30:00	0	0	0	0	9	0	0	1	9	29	1	10	0	11	14	0	0	0	0	3	0	19	0	0	0	0	0	0	0	5	0	0	0	0	0	0	9	0	0	1	9	29	1	10	0	11	14	0	0
23:00:00	0	0	0	0	0	0	0	0	0	0	7	0	0	0	8	0	0	0	0	0	0	7	0	0	0	0	0	0	0	4	0	0	0	0	0	0	0	0	0	0	0	0	7	0	0	0	8	0	0
23:30:00	0	0	0	0	0	0	0	0	11	0	0	3	0	0	59	0	0	0	0	0	0	0	0	0	0	0	0	0	0	0	2	0	0	0	0	0	0	0	0	0	11	0	0	3	0	0	59	0	0
00:00:00	0	0	0	0	0	0	0	0	0	0	4	0	0	0	3	0	0	0	0	0	0	0	0	0	0	0	0	10	0	0	6	0	0	0	0	0	0	0	0	0	0	0	4	0	0	0	3	0	1
00:30:00	0	0	0	0	0	6	0	0	0	0	7	0	0	14	1	0	0	0	0	0	0	8	7	0	0	0	0	0	0	0	17	0	0	0	0	0	0	6	0	0	0	0	7	0	0	14	1	0	7
01:00:00	0	0	0	0	0	1	0	0	0	0	9	0	0	0	8	0	0	0	0	0	0	2	11	0	0	0	0	0	0	0	21	0	0	0	0	0	0	1	0	0	0	0	9	0	0	0	8	0	4
01:30:00	0	0	0	0	0	0	0	0	0	0	0	0	0	8	50	0	0	0	0	29	0	1	12	0	0	0	0	0	0	0	18	0	0	0	0	0	0	0	0	0	0	0	0	0	0	8	50	0	0
02:00:00	0	0	0	0	0	0	0	0	3	0	4	0	0	11	1	0	0	0	0	10	0	8	7	0	0	0	0	0	0	0	12	0	0	0	0	0	0	0	0	0	3	0	4	0	0	11	1	0	0
02:30:00	0	0	0	0	46	0	0	0	0	0	1	21	0	0	82	0	0	0	0	2	0	11	0	0	0	0	0	0	0	0	0	0	0	0	0	0	46	0	0	0	0	0	1	21	0	0	82	0	0
03:00:00	0	0	0	0	0	25	0	0	0	0	2	8	0	0	2	12	0	0	0	0	0	0	0	0	0	0	0	0	0	0	0	0	0	0	0	0	0	25	0	0	0	0	2	8	0	0	2	12	0
03:30:00	0	0	0	0	0	0	1	0	0	0	6	0	51	0	26	12	0	0	0	0	0	8	0	0	0	0	0	0	0	0	0	0	0	0	0	0	0	0	1	0	0	0	6	0	51	0	26	12	0
04:00:00	0	0	0	0	0	0	6	0	3	0	4	0	0	0	8	4	4	0	0	0	0	7	0	0	0	0	0	0	5	0	0	0	0	0	0	0	0	0	6	0	3	0	4	0	0	0	8	4	0
04:30:00	0	0	0	0	0	0	0	0	4	0	30	0	0	0	64	26	25	0	0	0	0	4	0	0	0	7	0	0	0	0	0	0	0	0	0	0	0	0	0	0	4	0	30	0	0	0	64	26	0
05:00:00	0	0	0	0	0	0	0	0	21	0	24	11	0	0	29	2	4	0	0	0	0	11	0	0	0	0	0	0	0	0	0	0	0	0	0	0	0	0	0	0	21	0	24	11	0	0	29	2	0
05:30:00	0	0	0	0	0	0	0	0	12	0	16	0	0	0	15	10	0	0	0	18	0	3	0	0	0	0	0	0	9	0	0	0	0	0	0	0	0	0	0	0	12	0	16	0	0	0	15	10	0
06:00:00	0	0	0	0	30	0	0	0	4	0	0	0	0	0	14	2	0	0	0	0	0	5	0	0	0	0	29	0	0	0	0	7	0	0	0	0	30	0	0	0	4	0	0	0	0	0	14	2	0
06:30:00	0	0	0	0	0	0	0	0	17	0	0	0	0	0	0	0	0	0	0	39	0	18	15	2	0	0	19	0	0	0	0	14	0	0	0	0	0	0	0	0	17	0	0	0	0	0	0	0	0
07:00:00	0	0	0	6	0	0	0	0	2	0	0	0	0	0	0	0	5	0	0	20	0	0	2	0	0	11	11	0	0	0	45	28	0	0	0	6	0	0	0	0	2	0	0	0	0	0	0	0	0
07:30:00	0	0	0	57	0	0	0	0	0	0	10	0	0	0	0	22	22	0	0	25	0	0	0	9	0	16	12	0	20	17	16	0	0	0	0	57	0	0	0	0	0	0	10	0	0	0	0	22	17
08:00:00	34	0	0	35	0	0	0	0	0	7	17	0	0	0	0	0	21	0	0	33	0	0	0	0	0	27	8	0	17	13	0	0	34	0	0	35	0	0	0	0	0	7	17	0	0	0	0	0	13
08:30:00	12	0	0	16	11	5	4	0	2	24	9	0	17	0	3	25	8	0	0	40	5	0	0	1	0	8	40	0	0	4	0	0	12	0	0	16	11	5	4	0	2	24	9	0	17	0	3	25	2
09:00:00	13	25	39	6	64	25	246	0	1	1	21	0	13	0	11	2	19	0	0	0	0	4	14	12	1	12	8	0	16	3	4	16	13	25	39	6	64	25	246	0	1	1	21	0	13	0	11	2	1
09:30:00	12	48	106	14	12	10	11	2	0	0	2	12	9	0	0	0	7	0	2	0	0	3	4	17	5	17	23	0	0	0	11	8	12	48	106	14	12	10	11	2	0	0	2	12	9	0	0	0	5
10:00:00	4	18	3	8	10	9	0	0	2	1	14	8	2	0	9	0	0	2	28	3	0	43	7	19	0	11	0	0	13	6	3	2	4	18	3	8	10	9	0	0	2	1	14	8	2	0	9	0	8
10:30:00	18	10	8	15	25	4	1	4	2	2	18	19	3	0	10	0	0	3	19	24	0	18	1	20	4	12	0	0	0	6	15	3	18	10	8	15	25	4	1	4	2	2	18	19	3	0	10	0	14
11:00:00	36	0	15	12	18	8	0	0	4	3	10	10	14	0	2	0	24	1	15	2	0	25	5	6	4	3	0	0	8	0	31	15	36	0	15	12	18	8	0	0	4	3	10	10	14	0	2	0	6
11:30:00	10	11	0	4	8	6	0	0	4	11	6	0	26	0	6	0	0	0	31	0	0	22	0	5	16	9	0	0	6	3	77	0	10	11	0	4	8	6	0	0	4	11	6	0	26	0	6	0	3
12:00:00	1	0	4	6	7	9	0	37	10	3	1	2	5	0	5	0	2	35	23	3	2	22	0	22	0	7	0	0	3	4	36	0	1	0	4	6	7	9	0	37	10	3	1	2	5	0	5	0	0
12:30:00	1	0	0	5	0	2	0	36	4	0	8	2	6	0	17	0	27	0	0	1	3	1	9	32	0	3	0	0	10	0	7	13	1	0	0	5	0	2	0	36	4	0	8	2	6	0	17	0	1
13:00:00	13	25	12	12	12	4	0	31	6	14	16	14	22	0	19	0	2	0	0	0	9	40	0	12	3	8	0	0	4	10	44	1	13	25	12	12	12	4	0	31	6	14	16	14	22	0	19	0	23
13:30:00	0	35	8	3	10	0	0	2	4	4	12	0	5	0	4	69	5	8	1	0	26	21	2	3	0	4	0	0	0	1	56	7	0	35	8	3	10	0	0	2	4	4	12	0	5	0	4	69	1
14:00:00	17	11	8	9	9	14	4	14	15	6	22	2	8	0	20	0	0	1	3	0	3	16	4	6	32	5	0	0	26	4	5	0	17	11	8	9	9	14	4	14	15	6	22	2	8	0	20	0	61
14:30:00	4	22	8	6	13	8	45	19	10	11	12	17	16	2	6	0	0	0	13	0	0	0	14	0	9	5	5	0	15	0	6	0	4	22	8	6	13	8	45	19	10	11	12	17	16	2	6	0	2
15:00:00	0	0	0	5	3	0	11	0	2	2	15	0	18	0	0	0	0	41	33	0	0	0	5	37	0	10	1	0	0	0	0	23	0	0	0	5	3	0	11	0	2	2	15	0	18	0	0	0	4
15:30:00	0	0	0	0	16	2	7	0	7	0	8	4	22	0	0	5	0	42	21	0	0	2	1	12	21	4	0	0	14	0	0	10	0	0	0	0	16	2	7	0	7	0	8	4	22	0	0	5	6
16:00:00	0	0	0	4	7	0	51	0	7	3	9	0	15	0	6	1	4	9	0	0	4	19	11	8	14	10	0	0	7	1	1	10	0	0	0	4	7	0	51	0	7	3	9	0	15	0	6	1	7
16:30:00	11	12	2	20	11	3	6	2	2	3	16	14	12	0	8	6	10	12	0	0	0	20	20	13	1	11	0	0	13	16	9	9	11	12	2	20	11	3	6	2	2	3	16	14	12	0	8	6	0
17:00:00	8	12	12	6	13	27	0	13	16	11	15	8	7	17	10	6	32	29	0	2	3	40	31	16	27	25	16	0	17	23	25	52	8	12	12	6	13	27	0	13	16	11	15	8	7	17	10	6	21
17:30:00	0	2	7	12	16	2	17	18	4	8	11	0	0	31	10	3	9	2	16	0	3	28	8	4	5	13	4	0	1	1	17	37	0	2	7	12	16	2	17	18	4	8	11	0	0	31	10	3	8
18:00:00	0	0	0	17	0	4	21	0	10	0	9	0	0	0	9	12	4	0	12	0	0	14	0	6	5	9	0	26	14	6	21	15	0	0	0	17	0	4	21	0	10	0	9	0	0	0	9	12	1
18:30:00	5	0	1	10	11	6	20	0	1	0	30	4	4	0	16	7	0	2	0	0	9	6	0	35	3	13	3	4	24	4	27	18	5	0	1	10	11	6	20	0	1	0	30	4	4	0	16	7	0
19:00:00	19	27	36	16	30	10	15	19	20	0	27	0	28	2	16	16	1	0	6	0	1	7	10	11	1	3	13	10	1	3	22	23	19	27	36	16	30	10	15	19	20	0	27	0	28	2	16	16	0
19:30:00	22	30	31	13	23	24	30	8	11	14	16	2	27	1	14	36	25	1	3	0	0	20	6	7	5	14	6	10	16	5	22	0	22	30	31	13	23	24	30	8	11	14	16	2	27	1	14	36	5
20:00:00	1	0	0	18	13	6	26	0	14	4	1	7	33	8	23	29	2	0	10	0	1	19	10	16	4	14	41	13	12	9	20	0	1	0	0	18	13	6	26	0	14	4	1	7	33	8	23	29	1
20:30:00	40	42	31	53	82	61	75	36	42	47	86	34	51	22	62	51	8	0	4	0	10	23	20	22	7	14	7	12	10	18	19	45	40	42	31	53	82	61	75	36	42	47	86	34	51	22	62	51	0
21:00:00	42	61	23	51	93	60	65	51	50	46	96	29	79	47	83	58	55	40	20	16	61	48	58	63	53	46	37	12	41	51	56	49	42	61	23	51	93	60	65	51	50	46	96	29	79	47	83	58	34
21:30:00	37	38	4	42	63	39	62	34	53	30	68	20	52	32	35	61	75	41	26	17	61	52	59	69	65	64	38	27	35	53	55	39	37	38	4	42	63	39	62	34	53	30	68	20	52	32	35	61	53
22:00:00	6	16	0	51	17	34	53	29	39	22	53	21	25	8	9	39	63	37	27	2	34	34	45	62	70	54	60	2	30	41	64	30	6	16	0	51	17	34	53	29	39	22	53	21	25	8	9	39	42
22:30:00	0	0	0	18	3	10	32	8	24	8	0	1	30	0	42	28	52	11	0	0	0	22	20	38	39	56	45	0	24	29	50	0	0	0	0	18	3	10	32	8	24	8	0	1	30	0	42	28	33
23:00:00	0	0	0	0	0	0	15	0	1	0	0	0	7	0	7	0	24	0	0	0	0	6	3	9	20	4	0	0	0	19	15	0	0	0	0	0	0	0	15	0	1	0	0	0	7	0	7	0	15
23:30:00	0	0	0	0	0	0	0	0	0	0	0	0	0	0	0	0	0	0	0	0	0	0	0	0	0	0	0	0	0	12	0	0	0	0	0	0	0	0	0	0	0	0	0	0	0	0	0	0	0
00:00:00	0	0	0	0	0	0	0	0	3	0	0	0	80	0	0	0	0	0	0	0	0	0	0	0	0	0	0	0	0	7	0	0	0	0	0	0	0	0	0	0	3	0	0	0	80	0	0	0	0
00:30:00	0	0	0	0	0	11	0	0	24	0	0	0	25	0	0	0	0	0	0	0	0	0	0	0	0	0	0	0	0	12	0	0	0	0	0	0	0	11	0	0	24	0	0	0	25	0	0	0	0
01:00:00	0	0	0	0	2	5	0	0	0	1	1	0	13	0	27	0	0	0	0	0	0	0	0	0	0	0	0	0	0	0	0	0	0	0	0	0	2	5	0	0	0	1	1	0	13	0	27	0	0
01:30:00	0	0	1	0	8	6	0	0	0	2	32	2	0	0	30	0	0	0	0	0	0	0	0	0	0	0	0	0	0	0	0	0	0	0	1	0	8	6	0	0	0	2	32	2	0	0	30	0	0
02:00:00	0	0	6	2	0	20	0	0	0	0	44	0	7	1	12	0	0	0	0	0	0	0	0	0	0	0	0	0	13	0	0	1	0	0	6	2	0	20	0	0	0	0	44	0	7	1	12	0	0
02:30:00	0	0	2	34	7	21	7	0	0	0	30	0	17	2	15	102	0	0	0	0	0	0	0	0	0	0	0	0	0	0	0	0	0	0	2	34	7	21	7	0	0	0	30	0	17	2	15	102	0
03:00:00	6	0	0	37	1	10	7	0	5	0	34	0	24	1	17	12	0	0	0	0	0	0	0	0	0	0	0	0	5	0	0	0	6	0	0	37	1	10	7	0	5	0	34	0	24	1	17	12	0
03:30:00	2	0	0	3	17	2	0	0	21	0	2	0	5	0	0	29	0	0	0	0	0	0	0	9	0	0	0	0	17	0	0	0	2	0	0	3	17	2	0	0	21	0	2	0	5	0	0	29	0
04:00:00	0	0	0	0	0	0	14	0	0	0	0	9	0	0	0	88	0	0	0	0	0	0	0	0	0	0	0	0	1	0	0	17	0	0	0	0	0	0	14	0	0	0	0	9	0	0	0	88	0
04:30:00	0	0	0	0	3	0	0	0	0	0	0	0	0	0	0	8	0	0	0	0	0	0	0	37	0	9	0	0	0	0	0	2	0	0	0	0	3	0	0	0	0	0	0	0	0	0	0	8	0
05:00:00	0	0	0	0	0	0	0	0	1	0	0	2	0	0	1	0	0	0	0	27	0	0	0	2	0	0	0	0	0	0	0	0	0	0	0	0	0	0	0	0	1	0	0	2	0	0	1	0	0
05:30:00	0	0	0	0	0	0	0	0	12	0	0	4	0	0	0	0	1	0	0	0	0	0	0	0	0	0	0	0	0	0	0	0	0	0	0	0	0	0	0	0	12	0	0	4	0	0	0	0	0
06:00:00	0	0	2	0	0	0	0	0	4	0	0	4	19	0	0	0	0	0	0	0	0	0	8	6	0	0	0	0	0	0	0	0	0	0	2	0	0	0	0	0	4	0	0	4	19	0	0	0	0
06:30:00	0	0	15	0	0	0	0	0	1	0	0	39	0	0	0	0	2	0	0	0	0	0	0	2	0	0	0	0	0	0	0	9	0	0	15	0	0	0	0	0	1	0	0	39	0	0	0	0	0
07:00:00	0	0	2	0	15	0	0	0	0	0	0	19	16	0	0	0	0	0	0	0	0	0	3	0	0	0	0	0	0	0	2	0	0	0	2	0	15	0	0	0	0	0	0	19	16	0	0	0	2
07:30:00	0	0	10	0	16	4	0	0	0	0	0	4	8	0	0	0	0	0	0	0	0	1	0	0	17	0	0	0	0	0	21	0	0	0	10	0	16	4	0	0	0	0	0	4	8	0	0	0	5
08:00:00	0	0	11	17	2	9	0	0	8	0	0	0	10	0	0	0	1	0	0	0	0	0	0	0	6	0	0	0	15	0	4	0	0	0	11	17	2	9	0	0	8	0	0	0	10	0	0	0	0
08:30:00	5	1	1	16	19	1	0	0	18	1	2	3	13	0	5	0	47	0	0	0	0	48	0	4	18	0	0	0	14	25	6	0	5	1	1	16	19	1	0	0	18	1	2	3	13	0	5	0	19
09:00:00	7	38	33	4	13	3	0	0	8	112	0	13	9	0	7	4	15	3	0	0	0	0	12	10	15	4	18	0	3	9	24	2	7	38	33	4	13	3	0	0	8	112	0	13	9	0	7	4	21
09:30:00	4	7	21	9	10	8	0	1	15	1	17	2	11	0	11	2	15	18	0	0	0	8	14	17	14	6	46	0	1	3	17	2	4	7	21	9	10	8	0	1	15	1	17	2	11	0	11	2	15
10:00:00	6	0	15	2	26	3	0	11	4	4	9	9	9	0	3	20	21	4	0	0	0	25	17	19	5	10	44	0	10	1	12	0	6	0	15	2	26	3	0	11	4	4	9	9	9	0	3	20	13
10:30:00	12	20	16	8	19	25	0	6	1	1	15	30	13	0	7	1	20	6	0	0	0	38	5	19	2	17	6	0	19	8	18	2	12	20	16	8	19	25	0	6	1	1	15	30	13	0	7	1	6
11:00:00	10	26	16	3	31	1	0	8	10	21	6	2	7	0	6	2	16	9	0	0	0	11	9	14	4	7	0	0	6	5	8	0	10	26	16	3	31	1	0	8	10	21	6	2	7	0	6	2	17
11:30:00	2	0	0	0	1	0	0	2	7	6	0	4	15	1	0	0	4	0	0	0	0	5	25	22	4	1	0	10	7	5	20	5	2	0	0	0	1	0	0	2	7	6	0	4	15	1	0	0	7
12:00:00	0	0	16	1	2	0	0	4	2	0	0	0	7	67	0	0	4	52	2	0	0	0	33	7	5	2	46	11	10	0	16	0	0	0	16	1	2	0	0	4	2	0	0	0	7	67	0	0	9
12:30:00	3	0	0	0	2	1	0	3	7	10	0	26	5	1	4	0	12	26	0	0	0	31	10	7	3	8	0	13	10	3	6	3	3	0	0	0	2	1	0	3	7	10	0	26	5	1	4	0	5
13:00:00	0	0	28	0	2	0	0	1	13	1	16	7	20	21	1	1	0	30	0	1	0	6	8	6	0	13	9	0	2	3	18	0	0	0	28	0	2	0	0	1	13	1	16	7	20	21	1	1	3
13:30:00	2	4	0	1	7	0	0	16	13	0	24	30	9	8	0	0	6	2	0	0	0	4	7	8	2	7	5	0	5	0	17	0	2	4	0	1	7	0	0	16	13	0	24	30	9	8	0	0	1
14:00:00	4	18	44	11	5	0	0	0	5	6	9	19	7	39	5	0	0	0	1	89	0	7	32	5	4	5	37	39	8	0	13	11	4	18	44	11	5	0	0	0	5	6	9	19	7	39	5	0	5
14:30:00	0	0	3	9	6	0	0	0	6	1	6	2	4	2	1	0	0	0	7	4	0	14	0	2	1	2	0	2	0	49	8	11	0	0	3	9	6	0	0	0	6	1	6	2	4	2	1	0	1
15:00:00	0	0	2	0	1	0	0	0	0	0	4	5	1	5	0	0	0	0	0	0	0	2	0	10	0	4	17	1	0	1	11	15	0	0	2	0	1	0	0	0	0	0	4	5	1	5	0	0	14
15:30:00	0	0	2	10	0	0	0	0	1	0	4	7	4	1	10	0	0	0	1	17	0	0	4	13	0	3	0	0	0	0	17	10	0	0	2	10	0	0	0	0	1	0	4	7	4	1	10	0	0
16:00:00	4	0	0	5	3	0	3	0	0	0	0	2	0	1	0	0	0	2	1	14	1	1	8	5	0	6	0	1	26	8	9	11	4	0	0	5	3	0	3	0	0	0	0	2	0	1	0	0	9
16:30:00	1	0	0	1	0	0	9	0	0	0	0	0	4	2	0	0	20	24	1	0	4	13	14	9	8	27	0	0	6	14	26	30	1	0	0	1	0	0	9	0	0	0	0	0	4	2	0	0	5
17:00:00	15	33	42	23	24	24	15	16	4	0	31	4	17	5	34	0	0	4	11	0	30	22	6	17	13	6	0	0	19	15	16	65	15	33	42	23	24	24	15	16	4	0	31	4	17	5	34	0	6
17:30:00	6	0	1	14	2	15	21	5	4	0	4	0	12	6	31	1	0	0	10	3	16	23	12	7	2	16	22	1	15	5	22	17	6	0	1	14	2	15	21	5	4	0	4	0	12	6	31	1	2
18:00:00	2	0	0	4	0	10	24	18	7	0	2	0	8	5	28	1	0	0	5	7	1	12	2	1	11	7	30	26	10	2	10	28	2	0	0	4	0	10	24	18	7	0	2	0	8	5	28	1	0
18:30:00	3	0	47	11	6	11	35	13	4	0	15	11	14	2	15	10	1	0	4	12	1	7	6	7	2	6	1	15	12	1	12	38	3	0	47	11	6	11	35	13	4	0	15	11	14	2	15	10	0
19:00:00	4	2	17	14	31	16	22	17	5	1	0	5	14	0	24	11	1	0	8	11	9	25	23	8	3	1	17	0	11	5	23	19	4	2	17	14	31	16	22	17	5	1	0	5	14	0	24	11	0
19:30:00	8	3	18	14	10	17	30	24	0	6	29	14	24	8	16	32	13	0	2	25	3	8	10	10	20	12	32	0	10	0	24	7	8	3	18	14	10	17	30	24	0	6	29	14	24	8	16	32	1
20:00:00	16	37	18	15	13	20	26	23	3	21	21	14	17	14	11	45	25	3	19	0	12	22	19	10	11	6	1	0	14	7	26	25	16	37	18	15	13	20	26	23	3	21	21	14	17	14	11	45	0
20:30:00	59	59	54	40	77	62	57	51	35	60	81	35	55	37	76	64	24	7	3	8	17	17	11	17	6	10	11	6	15	19	21	23	59	59	54	40	77	62	57	51	35	60	81	35	55	37	76	64	0
21:00:00	51	55	1	51	27	41	59	40	62	66	85	29	38	24	42	52	68	51	73	20	33	40	62	57	70	57	27	9	38	49	49	30	51	55	1	51	27	41	59	40	62	66	85	29	38	24	42	52	34
21:30:00	2	16	0	22	1	22	30	25	39	47	58	18	12	12	39	11	70	32	2	0	0	28	35	44	72	48	14	0	24	30	46	4	2	16	0	22	1	22	30	25	39	47	58	18	12	12	39	11	38
22:00:00	0	8	0	0	19	4	13	10	2	13	4	2	0	2	11	0	52	6	20	0	0	0	27	28	55	36	0	0	3	26	18	11	0	8	0	0	19	4	13	10	2	13	4	2	0	2	11	0	6
22:30:00	0	0	0	0	0	0	0	0	1	0	0	0	0	0	5	0	5	0	18	0	0	1	0	0	28	1	0	0	0	2	0	4	0	0	0	0	0	0	0	0	1	0	0	0	0	0	5	0	0
23:00:00	0	0	0	0	0	0	0	0	0	0	0	0	0	0	0	0	0	0	0	0	0	4	0	0	4	0	0	0	0	0	0	0	0	0	0	0	0	0	0	0	0	0	0	0	0	0	0	0	0
23:30:00	0	0	0	0	0	0	0	0	0	0	0	0	0	0	5	0	0	0	1	0	0	1	0	0	20	0	0	0	0	16	0	0	0	0	0	0	0	0	0	0	0	0	0	0	0	0	5	0	0
00:00:00	0	0	0	0	0	0	0	0	0	0	0	0	0	0	3	0	0	0	0	0	0	5	0	0	0	0	0	0	0	15	0	0	0	0	0	0	0	0	0	0	0	0	0	0	0	0	3	0	0
00:30:00	0	0	0	0	3	0	0	0	0	0	8	0	0	0	0	0	0	0	0	1	0	2	0	0	0	0	0	0	0	3	2	0	0	0	0	0	3	0	0	0	0	0	8	0	0	0	0	0	0
01:00:00	0	0	0	0	16	0	0	0	0	0	0	0	0	0	1	0	0	0	0	55	0	0	0	0	0	0	0	0	0	8	1	0	0	0	0	0	16	0	0	0	0	0	0	0	0	0	1	0	0
01:30:00	0	0	0	0	138	0	0	0	7	0	5	0	0	0	1	0	0	0	0	6	0	16	1	0	0	0	0	0	0	9	10	0	0	0	0	0	138	0	0	0	7	0	5	0	0	0	1	0	0
02:00:00	0	0	0	0	2	0	0	0	9	0	13	0	0	0	13	0	0	0	10	1	0	0	0	0	0	0	13	0	0	6	7	0	0	0	0	0	2	0	0	0	9	0	13	0	0	0	13	0	0
02:30:00	0	0	0	0	15	0	0	0	20	0	3	0	0	0	9	0	0	0	0	0	0	0	1	0	0	0	69	0	0	8	0	0	0	0	0	0	15	0	0	0	20	0	3	0	0	0	9	0	0
03:00:00																	0	0	0	0	0	0	0	0	0	0	4	0	0	10	2	0																	0
03:30:00																	0	0	18	5	0	0	0	0	0	0	24	0	0	0	0	0																	0
04:00:00																	0	0	8	0	0	0	0	0	0	0	30	0	0	4	0	19																	0
04:30:00																	0	0	14	0	0	0	0	0	0	0	0	0	0	0	0	6																	0
05:00:00																	0	0	12	0	0	0	1	0	0	0	0	0	0	14	0	8																	0
05:30:00																	0	0	0	2	0	0	0	0	0	0	4	0	0	10	0	12																	0
06:00:00																	17	0	0	0	0	0	8	8	0	2	0	0	10	30	4	0																	0
06:30:00																	12	0	0	0	0	0	14	22	25	10	0	0	0	37	14	0																	0
07:00:00																	27	0	0	0	0	0	9	47	6	2	5	0	6	21	55	0																	8
07:30:00																	43	4	0	0	0	0	11	19	27	87	47	0	0	26	31	0																	19
08:00:00																	23	15	0	0	0	0	9	9	14	20	6	33	0	14	20	0																	0
[truncated: 75 more columns]

[truncated: 7 more sheets: Fig 1 S2 B (10%Coconut oil), Fig 1 S2 C (20%Coconut oil), Fig 1 S2 D (ND), Fig 1 S4 A (Soybean oil), Fig 1 S4 B (water), Fig 1 S4 D (Lard), Fig 1 S5 A (HSD)]
