# Supplementary material for: High-fat diet enhances starvation-induced hyperactivity via sensitizing hunger-sensing neurons in Drosophila
Source: eLife journal article supplement (doi:10.7554/elife.53103), 2020-04-23
Supplement: supp [file elife-53103-supp-v1.zip › elife_poa_e53103_Figure_4_source_data_1.xlsx]

## Sheet: Fig 4 C (ND Atg5 RNAi)
FED (ATG5 RNAi~BD-AD-AKHR)	M7-10.12																M8-10.12																M15-10.13															M14-10.13
20:30:00	38	66	95	23	32	31	20	34	29	31	20	58	34	51	35	55	51	24	16	0	52	30	52	43	49	95	53	20	56	51	65	25	9	10	25	29	38	35	50	36	39	59	57	29	48	57	39	33	32
21:00:00	0	6	1	0	0	0	0	0	0	0	0	0	0	0	0	0	0	9	0	0	31	0	0	0	0	7	3	0	4	0	0	41	0	0	0	0	0	1	0	18	13	11	4	6	8	0	9	0	0
21:30:00	0	0	0	0	0	0	0	0	0	0	0	0	0	0	0	0	0	2	0	0	0	0	0	0	0	0	0	0	0	0	30	1	0	0	0	0	0	0	0	0	0	0	0	1	0	0	1	0	0
22:00:00	0	0	0	0	0	0	0	0	0	0	3	0	0	0	4	23	0	5	0	0	1	0	0	0	0	0	0	0	0	0	3	8	0	0	0	2	0	0	0	0	0	0	0	0	0	0	0	0	0
22:30:00	35	0	0	0	0	0	0	31	0	0	69	0	0	0	0	0	0	19	0	0	0	0	0	0	0	41	0	0	0	0	3	0	0	0	0	0	0	0	0	0	0	0	0	0	0	1	0	0	0
23:00:00	0	0	0	0	59	0	0	0	0	0	13	0	0	0	39	18	0	0	0	2	0	0	0	0	0	0	3	0	0	0	34	0	0	0	0	0	0	0	0	0	0	0	0	0	0	0	10	0	0
23:30:00	0	0	0	0	4	0	0	0	0	0	0	0	0	0	0	0	0	0	0	0	0	0	0	0	0	0	43	0	0	0	16	0	0	0	0	0	0	0	0	0	0	0	0	0	0	1	1	0	0
00:00:00	0	0	0	0	0	0	0	0	25	0	0	0	0	58	0	33	0	0	0	0	0	0	0	0	0	6	0	0	0	0	0	40	0	0	0	0	0	0	0	0	0	0	0	0	0	2	0	0	0
00:30:00	0	42	0	0	0	0	0	0	65	0	0	0	0	0	0	0	0	18	4	0	0	0	30	0	31	0	0	0	0	0	0	51	0	0	0	0	0	0	0	2	0	0	0	7	0	7	0	0	0
01:00:00	0	37	0	0	0	0	0	32	0	0	0	16	0	0	58	83	0	5	15	0	0	0	23	0	62	20	0	0	7	0	0	0	0	0	0	0	0	48	1	0	0	0	28	0	0	0	0	0	0
01:30:00	0	4	0	0	0	0	0	37	0	0	51	36	0	0	23	70	0	4	10	0	6	0	0	0	0	98	0	0	1	0	0	0	0	0	0	0	0	24	1	29	0	0	8	0	0	0	24	0	0
02:00:00	0	14	0	0	0	58	40	0	0	56	67	0	0	0	4	0	0	16	9	0	0	0	0	0	6	1	0	0	7	0	44	0	0	0	0	0	0	0	7	41	0	0	0	9	0	0	11	0	0
02:30:00	22	2	0	0	0	24	9	0	0	11	0	0	0	0	9	49	0	10	8	0	0	0	0	0	0	25	0	0	41	0	13	0	0	0	0	50	0	0	12	0	0	0	0	0	0	0	0	0	0
03:00:00	71	45	0	0	0	22	0	0	3	0	0	0	0	0	11	14	0	0	0	0	0	0	0	0	0	31	0	15	21	0	0	104	0	0	0	27	0	0	6	0	0	0	3	0	0	0	0	0	0
03:30:00	0	8	0	0	24	0	0	0	70	0	0	0	0	0	4	0	0	0	0	19	0	0	25	0	0	0	0	0	0	0	0	22	0	0	0	0	0	0	0	0	0	0	21	1	0	1	24	0	3
04:00:00	26	0	0	0	59	0	25	38	9	0	0	0	0	0	27	0	0	0	0	56	0	0	6	0	72	0	0	0	2	0	0	0	0	0	0	0	0	0	0	0	0	0	0	0	25	0	0	0	4
04:30:00	31	55	0	0	0	0	19	2	0	0	44	0	4	22	57	0	0	0	8	46	0	0	0	0	36	69	0	0	28	0	0	0	0	0	0	0	0	0	0	0	19	0	27	0	65	0	0	0	0
05:00:00	0	0	0	0	32	0	3	0	0	0	34	0	0	65	0	0	3	0	0	10	0	0	0	0	0	1	0	0	0	0	0	0	0	0	0	4	0	0	0	0	58	0	2	0	15	0	0	0	0
05:30:00	0	0	0	0	0	0	24	0	29	0	8	54	0	9	0	26	0	0	0	0	0	26	0	0	0	27	33	0	0	0	16	0	0	0	0	36	0	0	51	0	14	0	0	0	0	0	0	0	6
06:00:00	0	0	0	0	0	0	0	20	15	28	0	4	0	0	0	109	0	0	0	0	0	54	0	0	0	8	36	0	0	0	0	10	0	0	0	0	0	0	12	58	9	0	0	0	0	0	0	0	0
06:30:00	0	0	0	0	0	0	0	0	0	0	67	0	0	46	33	23	3	0	6	3	0	37	0	0	8	0	0	34	0	0	0	72	0	0	0	0	0	14	0	4	0	0	0	4	0	0	0	0	0
07:00:00	0	0	0	0	58	37	0	0	0	0	0	0	0	0	0	6	0	0	0	33	0	10	0	0	29	0	0	62	2	0	18	22	0	0	0	0	0	33	0	0	0	0	0	4	22	6	0	0	0
07:30:00	46	31	0	0	14	2	0	0	0	6	0	0	39	0	0	43	9	0	42	0	24	22	0	0	0	27	3	21	0	0	0	0	0	0	0	0	0	0	0	6	0	0	0	19	35	0	3	0	0
08:00:00	4	42	26	0	61	16	0	0	49	1	8	38	14	0	39	39	36	3	33	0	40	0	17	0	0	0	45	6	0	0	40	48	0	0	0	26	6	11	24	0	38	0	0	46	0	2	46	6	0
08:30:00	45	33	51	42	38	53	40	31	28	59	43	45	45	26	37	62	22	28	48	49	29	37	28	21	28	37	37	50	48	87	15	25	15	37	32	34	45	45	37	34	9	42	25	19	65	45	23	33	46
09:00:00	27	45	50	37	45	41	29	23	18	6	10	19	37	13	36	75	75	50	36	30	26	32	33	10	16	28	58	24	22	27	7	22	13	22	12	16	28	13	18	13	20	63	31	9	21	18	23	43	25
09:30:00	9	18	15	38	1	10	10	20	17	21	23	74	48	14	32	33	4	13	82	27	25	28	18	0	18	14	38	28	2	8	8	20	14	37	16	14	23	13	7	13	24	14	9	8	39	22	5	26	20
10:00:00	17	35	18	10	19	26	37	7	24	16	8	2	62	22	34	32	26	11	24	2	16	67	17	2	6	11	31	33	43	6	2	16	13	18	3	13	5	17	8	6	13	10	6	0	19	15	9	4	17
10:30:00	0	17	0	0	23	7	1	11	5	6	0	6	33	3	31	31	13	8	19	19	14	9	17	3	0	27	18	0	1	27	18	14	0	20	0	6	18	0	0	17	11	26	31	6	10	14	12	12	6
11:00:00	10	14	4	4	0	1	8	17	64	0	13	18	22	0	14	18	15	8	12	9	7	39	25	4	14	11	21	19	0	2	16	14	8	7	3	8	6	31	18	1	2	4	4	6	13	21	14	9	20
11:30:00	0	9	18	6	14	0	1	4	52	23	18	29	8	5	20	18	20	3	19	5	11	6	5	2	0	16	26	12	0	13	0	9	0	21	1	13	1	17	10	5	2	21	12	4	10	12	12	0	4
12:00:00	3	9	0	5	18	16	0	35	35	0	0	0	19	10	10	33	0	13	19	2	5	1	26	2	37	3	7	7	0	3	5	8	4	5	0	7	0	9	0	6	2	1	0	5	5	0	4	3	7
12:30:00	2	14	0	0	6	5	0	12	6	0	11	28	36	2	8	15	10	0	9	7	3	0	0	1	0	12	16	4	0	2	0	1	12	10	0	13	0	0	6	0	13	16	0	10	15	12	0	1	6
13:00:00	0	20	0	0	10	0	5	10	0	0	0	4	10	0	8	23	4	0	14	0	2	0	25	6	0	2	0	17	0	14	0	4	0	0	0	7	0	0	8	14	2	7	8	0	16	10	14	0	0
13:30:00	2	32	4	30	13	18	11	0	31	12	24	0	5	0	6	25	0	9	5	21	4	0	0	0	1	7	6	25	0	0	0	10	1	2	2	0	0	0	0	0	0	28	3	5	5	1	2	15	0
14:00:00	0	16	13	9	9	1	9	14	20	10	0	28	7	19	28	15	0	0	0	0	2	0	0	0	7	0	0	3	0	7	4	0	6	16	0	9	0	27	4	8	13	5	4	0	0	10	5	0	0
14:30:00	0	20	0	0	5	5	0	0	11	0	0	3	5	0	0	8	31	4	14	16	1	0	0	0	0	0	0	10	0	0	0	5	0	0	0	3	0	5	0	16	0	0	0	5	0	0	0	0	0
15:00:00	16	28	25	15	26	21	0	20	41	18	32	23	16	21	12	32	10	30	16	12	21	20	32	9	17	28	29	15	18	11	7	13	0	7	0	10	0	33	16	21	3	0	0	0	0	13	18	0	0
15:30:00	16	30	31	16	22	11	0	23	21	10	0	0	12	2	2	21	4	2	21	5	15	49	31	65	28	9	10	13	2	0	22	8	2	5	0	7	0	2	1	5	0	18	27	3	47	1	4	0	0
16:00:00	0	0	0	0	10	23	0	23	10	0	0	22	0	0	6	11	0	0	40	1	0	7	0	3	2	4	0	0	0	0	10	9	0	0	0	8	0	0	4	0	0	1	4	6	4	4	1	0	0
16:30:00	6	11	1	0	17	1	0	0	21	5	16	2	5	0	16	22	1	0	1	19	5	9	8	0	0	0	6	7	0	0	0	5	0	0	0	0	0	0	0	0	3	5	5	3	8	0	0	2	0
17:00:00	33	73	43	53	29	31	26	37	61	43	30	53	40	38	48	75	41	39	67	39	31	44	36	21	34	24	72	31	66	26	12	16	9	15	0	5	0	0	1	26	0	20	11	0	27	14	2	0	0
17:30:00	0	57	19	0	31	4	52	1	13	0	12	0	16	0	7	17	0	68	6	0	3	2	6	0	0	8	4	8	13	0	7	4	0	0	0	8	0	10	25	0	0	0	0	0	17	1	14	0	19
18:00:00	2	4	11	12	32	5	17	2	3	7	22	0	6	6	15	48	27	15	0	2	5	0	18	0	0	13	10	8	21	0	6	5	12	4	0	0	0	28	0	10	2	0	10	0	2	29	22	0	3
18:30:00	0	7	12	29	18	10	0	3	15	6	0	15	2	5	16	32	22	11	30	2	3	15	46	0	0	6	15	8	36	3	4	0	0	0	17	11	0	0	3	3	24	0	0	12	12	20	0	0	7
19:00:00	4	28	14	10	28	1	1	19	22	7	10	3	18	14	16	16	12	3	16	9	12	17	9	8	18	6	17	9	30	20	16	13	0	0	16	11	0	4	6	20	12	10	0	8	16	6	0	0	8
19:30:00	3	31	28	13	27	7	17	29	4	14	11	18	27	10	20	25	0	1	3	1	17	4	0	0	5	19	18	6	18	4	6	6	2	8	8	12	15	0	10	16	0	10	9	4	12	6	14	7	17
20:00:00	19	45	12	47	39	11	18	30	22	8	14	26	45	17	48	36	13	3	25	24	15	6	21	33	7	23	23	13	0	24	25	18	23	20	10	19	41	21	28	40	16	9	9	18	49	26	25	27	24
20:30:00	53	43	52	73	36	28	46	35	73	25	33	88	21	49	98	81	41	6	28	15	64	59	43	30	51	53	51	55	23	89	62	81	35	45	39	50	31	56	28	48	70	61	34	45	55	23	48	30	31
21:00:00	8	22	23	4	23	0	24	0	27	0	0	31	17	0	46	57	6	2	2	0	26	19	26	6	20	25	0	16	0	30	40	37	0	0	6	3	0	5	0	2	36	10	0	0	1	2	13	0	0
21:30:00	6	86	16	0	8	0	0	0	0	0	0	17	2	0	48	24	0	0	4	0	0	0	6	0	0	14	0	2	0	2	10	7	0	1	0	0	0	0	0	0	23	0	0	0	0	0	5	0	0
22:00:00	0	17	0	0	10	0	0	0	5	0	0	19	0	0	6	40	0	7	0	0	0	0	0	0	4	4	0	0	0	0	0	0	0	0	1	0	0	0	0	0	0	0	0	0	0	0	0	0	0
22:30:00	0	44	0	0	7	0	0	0	7	0	0	0	0	0	2	9	11	0	0	0	0	0	0	0	0	0	0	0	0	0	0	0	0	0	0	0	10	0	0	15	0	0	0	27	0	0	0	0	0
23:00:00	13	20	3	0	10	0	0	0	11	0	0	29	2	7	0	12	0	0	12	0	0	0	0	0	0	0	0	2	0	0	0	0	0	0	0	0	19	0	0	19	0	0	0	1	0	0	0	0	0
23:30:00	15	16	0	0	43	0	0	0	2	0	0	4	0	1	7	0	0	32	2	0	0	0	0	0	0	0	0	0	0	0	0	2	0	0	0	0	3	0	0	0	0	0	0	20	0	0	0	0	0
00:00:00	18	61	0	0	0	1	0	0	2	0	0	41	0	9	0	55	0	0	10	0	0	0	2	0	0	0	0	0	0	0	0	13	0	6	1	0	40	0	1	0	0	0	32	21	0	0	0	0	0
00:30:00	0	35	14	0	18	0	10	0	0	0	0	0	0	3	7	19	0	0	0	0	0	0	0	0	0	31	0	0	0	0	0	30	0	0	4	12	7	0	14	0	0	0	10	0	41	0	0	0	0
01:00:00	0	0	12	9	8	0	33	0	0	0	41	0	0	5	15	0	0	0	0	0	0	0	0	0	0	0	0	8	0	0	0	27	5	0	14	29	23	0	0	0	0	0	0	0	8	0	0	0	0
01:30:00	7	0	15	0	0	0	0	0	0	0	42	0	0	0	34	0	0	0	11	0	0	0	44	0	0	46	0	0	0	0	0	0	13	0	0	0	36	5	0	30	0	0	0	0	15	0	0	0	0
02:00:00	5	10	2	0	31	0	0	0	0	2	0	2	0	0	23	0	0	0	0	0	0	0	40	0	0	0	23	4	0	0	0	0	0	0	0	0	1	0	0	8	18	0	0	0	0	0	0	0	0
02:30:00	0	61	0	0	14	0	0	0	0	0	0	1	10	0	33	52	0	0	0	0	0	0	27	0	13	4	0	0	0	0	0	0	0	0	0	0	11	0	0	0	35	0	0	0	0	0	22	0	0
03:00:00	0	17	0	1	0	3	29	0	0	0	24	7	47	0	0	35	0	0	0	0	0	0	0	0	55	0	37	9	0	0	12	26	0	0	0	0	0	0	0	0	10	0	0	0	0	0	5	0	28
03:30:00	25	0	18	32	0	16	16	0	0	0	3	0	0	0	44	0	0	0	2	0	0	9	0	0	35	0	2	0	0	18	8	37	0	0	5	24	0	0	0	0	0	0	0	0	0	0	0	0	30
04:00:00	4	0	3	9	0	0	0	0	0	0	0	0	0	0	11	8	0	0	0	0	0	18	0	0	26	37	0	14	0	0	0	0	0	0	0	0	0	12	0	0	0	0	0	0	31	0	0	0	0
04:30:00	0	0	2	0	0	0	22	0	0	0	0	0	0	0	0	0	32	0	0	0	0	0	0	0	13	0	0	0	0	0	17	0	7	0	0	0	22	38	0	0	5	0	3	0	3	0	5	0	0
05:00:00	0	0	5	1	20	0	4	0	0	0	0	0	0	0	0	18	0	0	0	0	0	0	0	0	0	14	0	0	2	0	40	0	4	0	0	31	1	8	0	0	0	0	51	0	0	0	17	0	0
05:30:00	5	0	0	39	24	0	0	0	18	0	2	0	0	0	26	40	0	0	2	0	4	0	0	0	0	0	0	0	0	0	6	22	0	0	0	14	0	0	0	0	0	0	5	0	32	0	0	0	0
06:00:00	0	0	0	2	18	0	0	0	51	0	49	0	0	0	0	18	0	0	0	0	14	0	0	0	0	10	0	0	0	0	0	0	0	4	0	0	0	0	0	0	26	14	0	0	2	0	0	0	0
06:30:00	0	0	0	0	7	0	0	0	15	0	47	0	0	0	0	0	0	0	0	0	0	0	0	0	9	0	0	0	0	3	24	0	0	31	0	6	3	0	0	26	24	21	0	20	3	0	0	9	0
07:00:00	24	2	27	0	0	0	2	0	0	51	0	0	0	14	0	0	0	0	0	0	0	0	0	0	0	0	24	0	0	0	0	0	0	5	0	0	0	23	0	0	0	0	0	0	0	0	0	0	0
07:30:00	0	7	0	21	4	0	0	0	35	3	6	0	0	0	2	33	0	0	0	0	0	6	0	0	0	32	2	22	0	0	0	2	0	6	0	21	8	1	22	0	15	0	0	0	24	6	4	4	0
08:00:00	0	39	23	14	10	9	0	8	25	0	21	0	2	10	15	43	0	3	60	0	31	14	40	0	25	27	2	35	0	17	21	51	0	8	0	0	21	18	0	29	6	35	17	18	33	0	2	0	9
08:30:00	30	52	31	43	29	37	52	25	40	32	25	99	32	28	65	63	30	0	25	28	31	21	33	17	32	29	39	51	26	18	18	20	17	29	20	20	41	25	23	23	10	64	27	27	30	36	19	8	31
09:00:00	28	54	31	45	8	21	26	24	25	17	32	22	78	17	37	53	15	19	13	27	26	15	39	9	19	17	50	33	33	20	22	8	5	20	12	20	26	21	19	33	9	14	12	13	30	15	10	18	22
09:30:00	26	25	32	31	3	11	4	4	2	8	10	19	34	19	37	47	16	4	28	16	16	11	34	6	2	33	16	20	22	14	5	11	2	16	5	14	37	17	11	7	40	12	0	10	19	15	10	4	7
10:00:00	7	27	27	54	28	2	19	6	12	7	5	31	27	21	53	37	11	8	21	23	8	2	36	6	4	16	17	10	1	13	19	10	5	11	2	7	37	25	4	18	7	8	8	0	18	14	5	6	28
10:30:00	5	35	6	22	10	3	0	3	10	10	20	0	35	22	30	37	6	0	23	6	4	23	26	17	1	14	13	8	0	11	10	5	4	5	4	5	31	19	10	11	1	13	6	8	14	15	8	10	22
11:00:00	14	27	14	7	27	6	6	12	0	0	12	0	14	9	24	31	0	5	61	3	6	12	21	0	17	12	13	10	1	4	5	11	8	12	26	6	35	14	21	21	7	19	10	8	25	4	10	4	0
11:30:00	0	6	2	0	24	6	10	11	4	0	6	0	23	16	12	39	5	0	28	10	10	2	23	11	18	22	19	20	0	2	3	2	2	23	3	6	36	16	4	17	19	2	8	0	8	33	6	12	20
12:00:00	0	14	4	6	18	0	0	5	12	0	13	15	6	8	8	18	4	2	42	4	3	2	26	0	0	14	13	3	0	6	0	21	3	11	0	6	46	1	9	0	6	4	6	0	18	29	1	2	13
12:30:00	0	6	0	3	9	7	0	3	0	0	2	0	17	2	7	18	9	0	11	15	5	4	12	2	0	7	4	13	0	2	0	6	0	4	0	0	20	11	5	5	12	2	7	4	12	28	0	2	2
13:00:00	0	23	0	16	21	0	1	6	0	0	4	37	8	10	16	13	3	0	10	3	4	4	17	1	15	0	3	8	0	2	3	8	0	3	0	2	24	3	1	2	0	2	14	18	0	0	0	2	0
13:30:00	7	22	2	3	9	0	3	0	0	0	2	69	10	3	2	7	16	16	8	12	0	2	5	0	10	1	0	2	0	6	7	0	0	1	2	6	23	20	2	0	3	0	7	0	17	0	10	0	0
14:00:00	19	0	0	0	11	0	0	0	48	0	0	0	4	13	11	0	20	0	0	7	2	1	28	0	7	0	0	28	0	0	4	23	0	20	0	2	22	3	4	9	0	0	13	0	0	0	7	0	0
14:30:00	0	45	0	0	9	0	0	0	9	0	9	13	3	0	4	28	0	17	4	5	0	0	0	2	0	0	0	14	0	7	2	1	1	7	0	0	18	0	0	0	0	0	5	0	0	24	0	0	0
15:00:00	6	2	0	9	32	0	0	0	20	0	0	11	5	0	10	1	10	0	0	4	0	8	0	0	11	0	0	16	0	0	0	8	17	6	0	4	22	8	4	0	0	0	11	20	14	8	0	0	0
15:30:00	0	20	0	0	15	0	0	0	4	0	0	1	24	0	0	18	6	5	0	0	4	4	24	0	0	21	0	8	0	9	6	5	0	10	0	7	20	21	0	0	0	0	2	5	7	9	0	0	0
16:00:00	0	38	0	8	8	0	0	0	0	0	6	33	4	0	6	0	2	2	6	16	43	0	0	8	0	0	0	16	0	0	0	15	0	1	0	4	12	0	6	6	0	0	0	0	0	4	0	0	0
16:30:00	2	5	0	1	9	0	2	0	0	0	5	1	26	0	19	54	0	5	4	0	0	0	8	0	0	4	0	4	0	5	0	15	4	0	0	8	7	9	19	0	0	0	13	4	15	5	2	0	0
17:00:00	18	16	34	33	25	40	26	37	27	41	44	46	36	15	0	60	0	18	68	22	16	20	0	0	36	17	17	15	0	16	0	0	0	19	0	2	26	3	5	10	0	0	0	0	8	2	5	0	0
17:30:00	0	18	3	0	19	5	1	1	0	3	3	0	35	4	14	17	1	0	13	7	5	0	0	4	19	11	10	13	0	0	0	8	2	6	0	4	5	15	5	0	0	0	25	0	15	8	13	0	4
18:00:00	0	20	14	29	33	13	14	8	0	8	0	0	16	6	6	14	29	0	1	14	11	50	0	11	10	15	5	10	0	12	0	3	0	17	0	7	2	10	11	5	0	0	0	0	7	15	3	0	3
18:30:00	0	41	11	1	7	11	0	7	8	0	9	6	14	10	11	22	14	17	38	3	6	8	13	0	16	13	3	21	0	0	2	4	1	9	7	14	27	0	4	17	0	0	6	8	16	10	14	0	20
19:00:00	0	41	15	24	3	17	17	20	19	9	6	26	20	9	0	32	6	4	12	2	6	6	26	13	4	16	23	0	0	14	10	9	23	18	2	18	17	24	4	8	1	4	0	5	13	16	28	0	9
19:30:00	19	46	6	27	1	16	78	14	13	26	10	22	28	15	13	32	8	20	20	0	18	15	24	8	16	19	19	17	0	4	15	5	8	5	8	24	15	34	10	17	16	22	8	6	38	15	26	3	30
20:00:00	22	72	15	61	0	17	32	33	9	38	24	30	45	22	15	48	0	19	28	32	37	20	42	14	13	34	20	20	1	18	15	30	1	13	5	28	32	44	20	37	17	21	11	16	39	19	23	7	33
20:30:00	55	82	49	63	2	66	126	54	63	33	36	62	23	42	52	83	57	33	40	31	59	66	63	34	64	67	68	48	33	87	62	83	26	29	40	37	66	50	57	60	64	40	73	33	59	56	36	25	36
21:00:00	17	41	28	47	5	26	0	6	5	0	7	27	20	0	6	44	15	9	12	0	15	9	54	9	9	33	30	5	0	20	44	42	0	9	11	30	41	1	10	4	29	71	54	0	14	7	33	0	3
21:30:00	4	0	18	7	7	0	0	0	0	0	37	0	15	0	21	5	0	0	0	0	0	9	0	0	22	17	18	10	4	13	17	35	0	0	0	15	7	10	0	0	0	0	0	0	0	0	0	0	0
22:00:00	0	0	43	0	0	0	16	0	0	0	0	0	0	0	0	64	0	0	0	0	0	0	0	2	0	1	0	8	0	0	4	25	0	0	0	10	42	11	0	0	0	0	0	0	0	0	0	8	0
22:30:00	0	0	0	0	8	0	0	0	0	0	6	0	0	0	9	7	1	0	0	0	0	25	0	0	0	5	0	0	0	0	15	0	0	0	0	2	25	0	0	29	0	0	0	2	0	0	0	2	0
23:00:00	14	0	15	23	0	0	4	0	0	0	0	0	0	0	0	19	0	0	0	0	0	4	0	0	18	0	0	16	0	0	0	0	9	3	0	34	6	0	0	0	23	0	0	0	0	0	0	0	0
23:30:00	9	0	25	3	0	0	32	0	0	0	45	0	0	0	33	2	0	76	0	0	0	0	0	0	0	20	0	0	7	0	0	0	0	0	0	6	0	4	9	0	17	0	0	0	0	0	0	0	0
00:00:00	0	0	0	0	0	11	0	2	0	0	18	0	0	0	19	61	0	6	0	0	0	0	0	0	0	3	0	5	0	0	0	42	0	0	0	46	0	0	0	0	0	0	0	0	0	0	0	0	0
00:30:00	33	1	0	5	0	0	14	0	0	0	0	1	0	0	0	21	0	0	0	0	0	0	0	0	0	21	0	0	0	0	8	9	12	0	0	34	0	0	7	30	0	0	0	0	0	17	0	0	0
01:00:00	0	81	28	0	0	0	41	0	0	0	0	0	0	0	12	32	0	0	0	0	0	9	0	0	0	0	0	0	0	0	0	0	7	0	0	13	0	0	0	8	0	0	0	0	0	0	0	0	0
01:30:00	0	43	71	1	0	0	0	0	0	0	20	0	0	0	26	1	0	0	0	0	0	0	0	0	0	18	0	4	0	0	0	0	0	0	0	0	0	0	0	0	0	0	0	0	0	0	1	0	0
02:00:00	0	34	5	71	0	0	7	0	0	0	9	0	0	0	0	8	0	0	0	0	0	18	0	0	32	0	0	0	52	0	0	0	0	0	0	26	37	5	0	0	0	0	0	0	0	0	13	0	0
02:30:00	0	77	0	29	0	35	5	0	0	0	15	0	0	0	0	0	0	0	0	0	35	38	0	3	44	33	0	0	0	24	0	9	4	4	0	4	23	0	0	0	24	0	0	0	0	0	0	0	0
03:00:00	0	51	0	72	0	3	4	0	0	0	0	60	0	0	0	2	0	0	0	0	27	0	0	0	8	0	0	0	0	29	12	72	11	8	0	0	13	0	0	25	39	0	0	0	0	0	0	0	0
03:30:00	2	0	0	2	0	0	47	0	28	5	0	8	0	0	0	3	0	0	0	0	0	0	0	0	39	34	2	0	0	8	2	24	0	0	0	29	9	35	0	0	0	0	0	0	0	0	0	0	0
04:00:00	20	43	0	19	0	0	18	0	39	0	0	0	0	0	11	70	0	0	0	0	0	0	0	0	0	0	0	0	0	0	0	0	0	0	0	0	2	4	0	0	10	0	0	0	0	0	0	0	15
04:30:00	0	0	0	49	0	0	0	0	0	3	31	0	0	0	22	6	0	0	0	3	0	0	0	0	0	2	0	0	0	0	0	0	0	15	0	21	2	0	0	0	21	0	62	0	0	0	0	0	35
05:00:00	0	2	0	4	0	0	0	0	0	0	36	0	0	0	31	9	0	0	0	0	0	0	0	0	5	0	0	0	0	0	35	25	1	4	0	2	0	0	0	0	0	0	27	0	22	0	0	0	0
05:30:00	0	34	0	14	0	26	0	0	0	0	0	11	47	0	24	4	0	0	0	0	0	0	0	5	45	0	0	0	0	0	16	1	7	1	4	0	0	0	0	0	0	0	6	0	32	0	0	0	0
06:00:00	2	20	0	20	0	0	0	0	0	0	0	20	29	0	0	0	0	0	0	0	0	0	0	0	0	13	0	0	32	0	10	0	0	5	0	0	23	0	0	0	2	8	0	0	4	0	0	0	0
06:30:00	0	0	34	0	0	17	2	0	0	0	0	0	1	0	0	0	0	4	4	34	0	6	0	5	0	14	0	32	0	0	0	0	7	8	0	10	14	17	0	11	28	0	0	21	14	0	0	18	0
07:00:00	0	0	0	13	0	0	0	0	3	0	0	19	22	8	0	51	0	0	7	5	13	0	0	1	3	0	2	21	0	0	0	1	0	0	0	6	0	1	5	10	4	0	0	17	3	21	0	0	0
07:30:00	0	25	0	2	0	3	0	0	28	0	26	2	5	0	3	34	0	0	0	9	5	0	0	0	0	9	17	13	0	0	3	4	0	0	0	0	24	2	0	12	0	0	0	0	10	51	0	0	0
08:00:00	10	43	80	33	0	33	4	0	0	43	0	52	20	15	40	17	12	0	9	12	37	38	0	0	14	37	36	20	0	8	9	12	0	10	0	8	28	0	0	0	24	0	0	0	13	0	24	8	0
[truncated: 278 more columns]

## Sheet: Fig 4 D (HFD Atg5 RNAi)
FED (ATG5 RNAi~BD-AD-AKHR)	M31-3.12															M24-3.11																M27-3.11															M16-3.13
20:30:00	40	35	39	16	26	19	42	24	32	47	40	25	37	51	14	36	55	35	26	45	35	36	52	63	27	62	37	50	48	10	54	23	32	33	44	39	49	24	44	29	31	32	65	26	49	28	36	51	39
21:00:00	27	20	0	0	4	5	0	0	38	42	15	18	47	31	56	30	7	63	67	44	15	13	41	11	10	22	17	0	2	0	67	0	9	9	56	9	65	14	48	8	22	22	9	2	13	0	0	0	29
21:30:00	29	13	36	0	6	3	0	0	34	0	2	13	14	42	18	24	0	10	6	0	9	0	0	0	0	0	0	0	0	0	0	0	0	0	9	0	32	0	7	0	26	0	14	0	12	0	0	0	20
22:00:00	21	0	6	0	0	0	0	0	4	0	0	0	0	4	0	23	0	23	16	0	0	0	17	0	23	19	0	0	12	0	13	0	0	21	0	0	19	0	0	0	0	0	0	0	7	22	0	0	0
22:30:00	0	0	0	0	0	0	0	0	0	0	0	0	0	1	0	41	0	3	37	8	0	0	17	0	34	21	0	29	25	0	44	0	0	8	0	0	29	0	0	11	32	9	0	7	7	2	0	0	0
23:00:00	1	0	0	0	0	0	0	0	1	0	0	0	0	0	0	25	3	21	32	24	8	0	10	10	9	16	43	14	9	38	12	0	0	19	0	0	16	0	0	0	5	0	47	4	11	0	0	0	0
23:30:00	33	0	0	0	0	9	0	0	11	0	0	0	0	0	0	19	3	0	26	0	18	0	0	21	7	0	0	0	47	0	12	0	0	5	0	0	15	0	0	0	20	0	2	0	7	0	0	0	0
00:00:00	35	0	7	0	0	0	0	0	0	0	0	0	0	0	0	15	46	0	25	20	11	0	0	0	0	0	1	0	5	2	0	0	17	0	37	0	0	0	46	3	12	0	23	8	12	0	0	0	0
00:30:00	16	0	47	0	0	0	0	0	15	0	0	0	0	20	22	10	12	5	19	0	0	7	0	0	0	0	7	0	21	48	19	0	25	0	34	0	26	0	27	0	0	23	0	11	10	0	0	0	0
01:00:00	0	0	2	0	0	0	0	0	28	0	0	0	0	0	0	8	0	6	24	0	0	9	17	0	57	20	5	0	20	63	0	35	20	0	0	24	0	0	0	0	0	0	17	0	0	0	0	0	0
01:30:00	0	0	0	0	0	0	0	0	15	0	0	0	0	23	0	14	0	14	22	33	13	0	31	0	17	0	58	0	18	27	3	24	13	0	16	53	0	0	23	0	0	0	0	12	16	7	0	0	0
02:00:00	0	0	0	0	0	8	0	0	2	0	0	0	0	0	0	2	16	0	16	0	13	0	0	9	0	17	0	0	10	0	12	0	6	13	40	35	0	0	0	0	15	25	24	3	4	0	0	0	0
02:30:00	28	0	0	0	0	2	0	0	25	40	0	0	0	33	54	11	9	18	26	17	0	11	8	0	0	4	0	7	26	0	0	0	6	39	39	3	41	0	4	0	18	0	0	0	2	0	0	0	0
03:00:00	33	0	39	0	0	0	0	0	19	47	0	0	0	16	0	15	0	0	18	0	11	0	0	16	0	0	0	45	2	0	0	0	4	0	12	9	41	0	0	0	0	0	0	7	0	0	0	0	0
03:30:00	32	0	35	0	0	0	0	0	4	6	0	0	0	0	0	1	16	0	5	28	0	0	0	6	8	0	12	27	13	0	0	0	3	0	8	14	0	17	0	0	18	15	0	11	2	0	0	0	0
04:00:00	17	0	0	0	0	0	0	0	0	0	43	0	0	0	0	0	3	0	2	0	0	4	0	0	0	5	26	10	17	0	0	0	3	0	15	1	9	27	0	0	0	0	14	3	0	0	0	0	0
04:30:00	0	2	0	0	0	0	0	0	14	0	29	0	0	0	0	0	0	0	4	11	0	0	0	0	0	15	0	0	9	0	0	0	23	3	15	0	13	0	17	0	0	0	28	0	20	0	0	0	0
05:00:00	0	48	8	0	0	0	0	0	0	0	2	0	0	0	0	0	12	0	22	0	0	0	0	30	0	0	7	0	20	0	39	26	0	0	12	6	0	0	29	0	0	25	0	4	0	0	0	0	0
05:30:00	5	22	46	0	13	0	48	0	0	0	0	22	0	0	0	9	0	0	0	5	0	0	0	22	0	0	0	0	16	0	49	0	22	0	0	0	0	0	0	0	0	1	0	12	17	0	0	0	0
06:00:00	0	0	29	0	0	0	3	0	0	0	0	24	0	0	0	16	0	0	0	29	5	0	38	0	49	3	0	25	1	14	0	0	0	0	0	0	12	7	0	0	0	0	0	8	0	5	0	0	0
06:30:00	0	0	0	48	0	0	0	0	20	21	0	0	19	25	0	0	6	0	16	9	0	2	0	0	47	20	0	0	9	0	0	0	27	32	0	41	18	0	20	0	31	0	27	0	0	12	0	9	0
07:00:00	0	0	0	18	0	0	0	0	27	23	0	0	47	30	0	0	18	0	11	16	0	0	0	18	38	0	13	0	9	0	0	0	0	5	19	13	0	0	0	9	6	0	0	2	0	0	37	36	0
07:30:00	8	9	10	0	0	0	11	0	25	3	3	3	56	28	0	0	0	0	0	16	0	8	0	0	13	8	0	0	0	4	35	30	25	0	1	0	9	0	0	13	9	25	11	10	0	0	0	2	0
08:00:00	76	20	10	0	0	0	31	0	24	0	43	8	21	0	0	0	6	0	13	2	0	0	18	0	6	0	26	19	34	0	0	5	31	33	0	15	24	0	29	1	14	0	3	2	6	0	0	0	1
08:30:00	25	25	82	27	54	14	62	30	28	66	37	31	34	36	45	10	16	36	13	16	28	25	26	8	39	6	19	45	40	28	39	21	28	28	24	23	22	29	34	13	8	18	24	28	17	24	29	27	64
09:00:00	9	15	36	21	45	22	44	26	40	33	38	17	27	33	48	23	26	27	11	23	14	8	24	13	13	7	5	55	39	49	10	10	22	15	26	27	21	13	34	0	3	0	37	21	6	12	60	26	54
09:30:00	14	9	23	9	36	15	19	10	18	51	28	0	24	0	32	7	20	25	7	4	12	10	25	14	15	14	0	73	32	6	10	33	20	16	11	73	15	25	15	4	3	0	13	15	7	17	22	17	32
10:00:00	29	12	14	13	38	8	33	17	17	9	19	5	34	22	23	2	20	8	18	38	7	11	7	4	32	40	19	62	18	23	4	18	21	21	20	31	19	6	24	7	9	0	4	13	5	12	35	12	11
10:30:00	37	22	23	12	34	4	45	16	8	7	27	28	25	14	15	14	13	8	16	23	3	4	30	2	24	10	0	28	22	0	10	28	13	11	17	21	13	17	8	4	13	4	11	4	8	12	29	10	18
11:00:00	11	14	8	14	14	2	13	14	10	25	9	5	13	0	22	0	13	7	8	20	0	6	6	3	6	9	0	24	6	0	3	16	0	15	12	19	7	7	23	2	2	2	9	7	3	3	23	7	18
11:30:00	9	12	0	16	26	0	22	13	12	27	27	0	0	11	18	0	6	5	4	7	26	17	8	18	19	0	0	31	18	0	0	2	0	2	15	23	3	8	17	0	0	0	0	0	0	0	9	11	14
12:00:00	32	20	25	2	0	0	16	14	11	12	14	2	48	0	7	25	3	2	7	20	5	0	5	12	5	4	0	34	5	27	0	21	9	18	21	58	1	15	0	0	0	0	9	0	8	10	0	4	11
12:30:00	23	12	12	5	0	0	10	3	2	4	10	0	11	0	18	2	6	5	4	2	0	2	7	0	1	3	0	15	0	0	0	6	3	9	9	19	43	5	24	0	0	5	3	6	0	0	9	9	6
13:00:00	10	10	0	2	30	0	12	2	8	14	54	0	18	0	12	4	18	2	0	54	0	17	0	0	8	6	12	22	12	0	0	0	5	9	0	9	10	12	0	0	0	0	1	4	6	2	15	3	0
13:30:00	0	0	0	0	0	0	0	0	0	0	30	0	0	0	9	8	0	14	4	0	0	0	0	4	0	0	0	19	0	18	0	10	0	0	15	1	13	5	13	0	0	0	0	5	0	0	0	0	28
14:00:00	0	0	0	0	0	0	0	0	0	0	0	0	0	0	1	0	0	0	4	0	0	0	0	0	1	2	0	4	0	0	0	0	0	0	0	14	0	1	0	10	0	0	0	0	0	0	21	29	4
14:30:00	21	12	7	0	0	26	31	0	20	1	20	0	0	0	23	0	14	0	0	0	0	0	0	0	0	0	0	7	0	10	0	0	2	16	20	11	7	0	0	0	1	0	0	0	6	0	11	11	6
15:00:00	15	23	20	5	0	0	1	0	2	52	32	0	0	0	0	0	4	0	4	0	0	0	0	0	0	2	0	18	0	6	0	0	0	0	2	3	12	7	0	0	11	0	0	0	3	0	0	0	60
15:30:00	15	10	0	19	7	0	12	0	28	0	0	0	0	0	6	6	0	0	0	0	0	0	0	0	0	0	0	25	4	3	0	1	0	0	4	0	0	0	42	0	0	8	0	0	0	0	0	0	13
16:00:00	0	0	0	0	49	0	6	0	5	0	6	0	39	0	0	2	0	14	27	0	0	0	0	2	4	0	0	52	39	13	0	30	16	19	28	19	5	3	4	0	2	0	0	2	0	16	0	0	4
16:30:00	9	0	0	0	8	11	9	0	0	1	0	0	9	0	0	17	19	30	16	18	21	20	34	20	37	6	14	42	28	56	34	26	13	29	41	34	74	31	28	11	13	24	37	32	14	23	0	0	7
17:00:00	10	17	14	21	25	20	28	0	4	32	15	20	8	29	17	0	0	18	0	12	10	0	9	0	13	0	0	39	32	55	5	5	0	5	20	11	0	11	14	0	0	5	7	2	3	9	0	0	0
17:30:00	21	6	11	13	2	2	38	2	17	28	22	28	14	18	8	0	4	13	0	2	3	0	0	0	0	0	14	4	19	2	2	12	3	8	21	6	13	6	2	0	2	0	10	16	1	7	6	0	0
18:00:00	9	17	1	0	0	0	0	2	3	5	0	0	0	0	0	0	0	0	0	0	0	0	3	0	6	0	0	4	4	0	0	0	0	0	14	6	0	0	0	0	0	0	8	0	0	0	17	0	0
18:30:00	7	0	3	0	8	0	5	2	11	16	15	2	14	0	6	1	0	0	0	0	0	0	1	0	11	0	0	0	12	28	0	12	0	0	8	0	0	0	18	0	0	0	9	0	0	0	8	0	40
19:00:00	9	8	0	1	0	0	6	0	7	15	19	0	0	0	8	12	6	11	4	0	0	0	0	8	15	0	0	0	4	12	0	16	0	4	18	23	0	10	21	0	0	4	4	1	6	16	18	0	38
19:30:00	15	11	2	4	7	7	14	4	3	23	14	0	6	8	11	6	24	11	20	0	0	0	18	2	14	4	4	43	33	13	13	15	6	6	20	10	0	23	24	0	0	0	0	7	10	7	30	21	19
20:00:00	12	45	32	31	45	22	22	29	30	34	26	17	30	22	18	10	9	27	14	1	15	14	18	10	16	22	14	56	6	20	3	10	12	6	18	13	0	6	25	0	0	0	20	9	8	13	15	21	7
20:30:00	38	44	35	24	48	31	54	37	30	53	46	49	39	48	38	41	2	38	39	79	16	23	24	25	37	28	21	43	57	45	39	30	24	50	51	33	52	18	39	33	33	34	61	20	13	27	39	40	44
21:00:00	41	50	0	0	48	9	46	2	26	51	15	36	23	39	31	22	13	39	31	24	17	0	21	25	27	20	20	59	4	34	30	17	34	37	29	21	32	13	20	2	22	10	47	10	14	25	12	0	22
21:30:00	50	55	23	0	22	5	23	0	39	35	8	35	24	17	26	40	41	22	38	31	10	0	23	23	17	21	5	20	0	87	33	35	42	37	32	22	22	11	35	3	17	1	48	4	6	18	0	5	26
22:00:00	24	0	0	0	0	0	0	0	2	21	0	2	3	0	0	20	15	0	26	26	18	0	8	0	0	7	0	0	0	17	19	1	13	27	12	16	2	3	12	0	6	0	16	0	0	6	0	0	6
22:30:00	0	0	0	0	0	0	0	41	0	11	0	0	0	0	0	0	0	0	0	0	0	0	0	0	0	0	0	0	0	0	0	0	0	0	0	0	0	0	0	0	0	0	0	0	0	0	0	0	1
23:00:00	0	0	0	0	0	0	0	0	0	30	0	0	0	0	0	11	5	0	5	0	8	0	0	0	0	0	0	0	0	0	0	0	7	5	0	0	0	9	0	0	0	0	0	6	0	0	0	0	0
23:30:00	0	0	0	0	0	0	0	0	0	24	0	0	0	0	0	5	18	0	6	0	11	0	0	0	0	10	0	4	0	14	8	0	2	0	0	0	0	2	14	0	0	0	0	2	17	0	0	0	0
00:00:00	0	0	28	0	0	0	0	0	0	6	0	0	0	3	0	0	0	0	0	0	0	0	0	0	0	0	0	0	0	0	0	0	0	0	0	0	0	0	0	0	0	0	0	0	5	0	0	0	0
00:30:00	0	0	9	0	0	0	0	15	6	12	0	0	0	23	0	9	14	0	25	35	0	0	0	86	36	0	0	0	31	42	0	16	25	28	1	25	0	0	7	0	28	0	32	0	15	31	0	0	0
01:00:00	0	8	0	0	0	0	0	0	47	0	0	0	0	0	0	0	0	0	0	0	0	0	0	0	1	0	0	0	0	33	0	0	0	0	0	0	0	0	0	0	1	0	0	0	0	0	0	0	0
01:30:00	0	31	0	0	0	0	0	0	19	38	0	0	0	0	38	0	0	0	0	0	0	0	0	0	0	0	0	0	0	0	0	0	0	0	0	0	0	0	0	0	4	0	2	0	0	14	0	0	0
02:00:00	0	1	0	0	0	0	0	0	2	26	0	0	38	4	17	0	0	0	6	0	0	0	0	7	38	0	0	0	0	15	0	0	0	0	0	0	0	0	0	0	0	0	2	8	4	3	0	0	0
02:30:00	0	0	35	0	0	18	0	0	0	2	0	0	50	19	0	0	14	0	21	0	17	0	0	0	14	0	0	0	0	0	0	0	24	37	53	0	0	0	0	24	21	21	40	3	16	22	0	0	0
03:00:00	48	0	31	0	0	9	0	0	0	22	42	0	9	14	0	0	0	0	0	0	0	0	0	0	0	11	0	0	0	0	0	0	0	0	34	0	0	0	0	0	0	3	0	0	0	0	0	0	0
03:30:00	58	0	17	0	0	0	0	0	0	0	0	0	0	0	0	20	0	0	0	32	0	0	0	27	0	63	0	0	0	0	0	0	0	16	0	0	8	0	0	0	0	0	0	11	3	0	0	0	0
04:00:00	40	0	0	0	0	0	3	0	0	7	0	0	0	0	0	0	0	0	0	9	22	32	0	34	0	16	0	0	0	0	0	0	0	0	0	0	3	0	0	0	0	0	1	0	0	0	0	0	25
04:30:00	44	0	13	0	0	0	0	0	0	0	0	0	0	0	0	0	27	0	0	0	0	1	0	0	0	16	0	0	38	54	0	36	0	0	34	0	5	40	0	0	0	0	6	14	17	0	11	0	36
05:00:00	2	0	6	0	0	0	0	0	2	22	0	0	0	0	0	2	0	0	23	22	0	0	18	0	0	10	0	44	26	0	0	6	23	40	0	0	41	3	32	17	0	0	52	14	11	0	6	0	2
05:30:00	0	0	0	0	0	0	13	0	47	0	0	0	0	0	0	0	0	42	4	0	27	0	0	0	0	40	0	31	0	0	0	0	0	0	0	0	12	0	0	0	44	0	7	2	13	0	0	0	0
06:00:00	0	0	41	0	0	0	27	0	27	0	0	0	0	0	0	0	0	19	0	0	0	21	0	0	0	17	14	5	0	0	0	0	0	0	0	14	0	0	0	0	2	0	0	0	7	0	5	0	30
06:30:00	0	0	51	0	0	0	0	0	0	0	0	0	0	4	0	2	0	0	8	8	0	0	0	9	20	17	0	0	0	26	14	20	42	36	38	43	22	0	6	0	13	6	23	0	11	0	0	0	0
07:00:00	46	39	38	8	27	13	27	15	10	47	0	41	42	28	28	0	0	0	0	32	0	0	0	0	0	20	0	0	0	0	0	0	4	8	0	0	44	0	0	0	0	0	0	0	6	0	0	0	0
07:30:00	8	17	0	42	20	0	0	14	15	0	11	2	41	0	0	0	5	0	0	8	4	0	6	5	8	65	0	6	0	0	3	8	15	19	14	2	8	3	9	9	10	0	15	18	10	4	0	22	8
08:00:00	33	23	32	14	20	17	14	7	10	4	47	28	30	3	18	0	7	0	14	9	8	0	23	40	30	26	0	28	0	0	2	5	13	38	17	16	39	21	22	2	0	0	2	17	15	35	0	12	13
08:30:00	27	26	53	45	46	24	39	26	17	57	31	17	4	26	21	21	15	17	16	18	21	33	20	6	52	16	19	32	34	53	23	18	49	40	22	33	17	19	38	10	26	15	33	20	35	15	35	19	15
09:00:00	29	21	50	19	55	15	47	20	25	34	27	16	22	12	26	13	28	22	23	15	9	19	22	7	36	14	16	39	28	18	14	33	30	29	34	21	27	20	28	10	0	0	23	19	13	15	37	29	32
09:30:00	37	23	18	17	22	14	23	14	34	37	26	13	39	21	21	17	15	12	15	20	9	18	19	11	12	13	7	58	10	38	20	24	8	17	25	23	31	27	35	4	4	2	16	16	11	13	23	22	75
10:00:00	26	21	8	19	15	11	22	14	10	32	37	13	15	10	22	7	16	14	8	19	6	9	13	6	25	14	10	55	14	20	9	16	6	14	19	23	8	22	37	6	0	1	19	9	9	16	13	21	33
10:30:00	20	22	11	12	17	2	36	7	6	36	12	12	32	4	20	10	14	8	14	8	2	5	7	6	20	22	10	17	10	41	19	24	11	28	24	24	18	19	30	0	4	3	13	12	8	6	17	24	9
11:00:00	18	15	9	7	27	1	38	7	6	22	25	21	19	14	20	8	19	11	8	13	8	9	19	9	7	13	4	20	19	24	9	18	2	22	17	16	3	31	17	3	0	0	15	4	5	7	23	21	29
11:30:00	22	13	9	12	20	0	13	2	11	12	7	8	17	0	20	0	9	16	10	11	22	5	4	0	6	14	3	27	9	2	6	18	7	10	21	13	24	26	23	2	0	0	7	2	3	18	2	15	11
12:00:00	42	4	2	10	7	20	24	10	8	13	6	4	7	12	6	5	4	0	10	44	0	9	3	16	14	15	4	6	0	20	26	15	9	40	20	47	2	15	21	0	0	0	4	8	2	2	0	13	4
12:30:00	9	11	1	4	15	0	10	5	8	10	3	8	16	5	16	6	5	7	2	17	0	7	1	2	2	4	3	38	12	0	8	37	0	32	13	9	45	8	23	0	0	0	1	0	7	3	0	19	14
13:00:00	36	9	18	9	10	0	10	6	6	6	8	2	2	5	10	0	2	0	2	4	12	0	12	11	16	19	9	15	6	19	11	16	0	27	5	14	9	21	8	0	0	0	7	0	1	6	0	10	0
13:30:00	23	0	0	0	1	28	18	0	11	0	1	2	0	0	13	9	0	0	10	0	4	0	0	4	3	13	0	32	15	3	2	2	2	0	6	0	21	3	6	0	8	0	6	0	13	0	0	10	24
14:00:00	33	37	19	18	19	23	13	20	18	17	8	11	12	17	6	2	0	4	6	16	0	0	17	15	5	5	0	0	33	1	15	0	0	11	15	34	0	7	0	0	0	0	7	4	2	0	0	2	1
14:30:00	13	6	4	13	8	12	32	1	6	17	0	5	14	3	8	0	0	14	7	5	0	4	0	0	22	15	0	0	0	20	0	18	0	0	12	20	0	5	0	0	0	0	3	12	8	17	0	5	0
15:00:00	22	0	9	0	0	0	0	6	8	0	0	0	0	0	3	0	1	2	2	0	0	0	0	1	9	0	0	0	0	0	0	7	0	36	0	29	21	8	38	0	0	0	6	0	7	0	2	11	20
15:30:00	0	0	0	0	0	0	0	0	0	0	0	0	0	0	4	0	12	7	0	7	0	10	0	0	5	10	0	28	0	31	0	0	0	0	18	0	0	6	0	0	0	0	1	0	0	0	0	66	1
16:00:00	0	0	0	0	0	0	5	0	4	0	0	0	0	0	8	11	0	9	12	16	0	7	0	0	14	0	0	1	0	3	0	5	0	8	4	32	0	7	18	0	0	0	11	0	1	0	0	0	0
16:30:00	10	7	0	0	0	0	0	7	5	10	0	0	0	0	0	0	0	0	0	0	0	0	0	0	37	0	0	0	0	0	0	5	0	1	13	41	9	8	19	0	0	0	7	0	0	0	0	5	4
17:00:00	19	3	0	0	0	0	4	0	11	16	0	0	0	0	6	0	0	9	2	0	0	0	15	31	7	0	0	35	16	22	17	16	9	35	29	12	28	8	22	0	0	0	18	8	6	14	0	14	24
17:30:00	5	0	0	0	0	0	0	0	2	15	0	7	0	0	9	0	0	15	0	0	0	0	11	24	9	0	0	13	32	50	4	0	0	13	13	13	0	17	18	0	0	0	26	0	0	11	15	0	7
18:00:00	19	0	24	0	0	13	15	0	2	20	0	2	0	0	19	0	0	1	0	0	0	0	15	11	34	0	0	16	10	17	0	0	0	0	9	9	0	21	11	0	0	0	17	0	0	0	20	0	0
18:30:00	9	7	21	0	16	5	4	0	0	28	18	9	0	16	0	8	0	7	2	9	0	0	0	14	21	0	0	8	1	18	0	1	0	15	8	7	0	9	10	0	0	0	21	0	14	0	0	0	0
19:00:00	7	2	3	0	3	0	22	0	10	42	28	4	15	0	0	0	0	16	8	0	0	0	3	4	13	4	0	28	19	18	0	21	0	30	19	4	0	5	23	0	0	4	23	0	13	4	19	3	8
19:30:00	4	20	24	36	31	11	28	6	4	32	15	15	28	25	19	13	14	18	19	14	18	23	13	20	18	17	8	31	8	26	17	14	9	28	17	29	8	17	30	3	5	19	41	14	9	17	14	15	10
20:00:00	19	20	21	20	2	11	28	12	19	57	28	11	16	21	7	11	16	27	13	20	11	18	13	12	23	34	16	51	27	35	23	16	13	8	23	15	20	22	13	6	6	6	26	18	12	15	2	6	0
20:30:00	43	54	48	22	46	36	33	51	34	59	51	34	22	29	36	21	34	38	35	37	37	22	33	41	40	36	30	48	43	70	32	30	29	39	38	43	38	40	39	23	31	27	61	27	18	36	31	31	29
21:00:00	29	38	21	1	33	28	30	3	21	49	37	42	24	19	25	36	6	34	39	34	17	19	35	45	5	29	15	23	32	54	43	33	37	37	41	35	33	23	32	0	20	14	63	17	11	46	0	0	23
21:30:00	22	36	4	0	52	14	33	0	12	35	16	17	39	18	27	36	27	26	26	33	18	36	29	51	44	22	29	27	28	40	45	19	38	33	41	29	32	27	38	2	17	12	42	24	15	49	4	10	10
22:00:00	24	49	10	0	29	2	38	0	16	30	2	7	39	0	1	5	0	0	0	4	0	0	2	1	0	14	0	5	0	0	2	0	1	0	13	0	2	4	14	5	0	2	15	0	0	1	0	1	1
22:30:00	7	0	0	0	0	0	0	0	5	39	0	0	6	0	0	2	0	0	0	7	0	0	0	0	0	0	0	0	0	1	0	0	8	0	29	0	0	0	0	0	0	0	0	0	0	1	0	0	11
23:00:00	0	0	0	0	0	0	0	0	0	0	0	0	2	0	3	0	0	13	0	0	0	0	0	2	0	6	0	0	1	0	0	0	3	18	1	0	0	0	0	0	0	0	0	0	0	0	0	0	0
23:30:00	0	0	0	0	0	0	0	0	0	12	0	0	13	0	6	0	0	23	0	0	0	1	0	0	0	36	0	0	2	1	0	0	0	1	25	0	0	0	0	0	0	0	0	8	0	0	0	0	0
00:00:00	0	0	0	0	0	0	0	0	12	34	0	0	14	3	10	0	0	31	0	0	0	0	0	1	0	2	0	0	0	0	0	0	16	1	32	0	0	0	0	0	0	0	0	0	0	0	0	20	8
00:30:00	0	0	16	0	0	0	0	0	1	7	0	0	0	0	0	12	0	10	0	0	0	0	0	1	0	0	0	0	0	0	0	0	47	0	19	0	0	0	0	0	0	0	22	0	0	0	0	1	24
01:00:00	0	0	21	0	0	0	0	0	23	10	0	0	0	1	0	2	0	69	0	0	0	7	0	6	0	0	0	0	0	0	0	0	0	0	33	0	0	0	0	0	0	0	0	1	2	0	0	0	34
01:30:00	0	0	37	0	0	0	0	0	35	18	0	0	0	9	25	6	0	60	0	0	0	18	0	51	0	18	0	0	1	0	0	0	0	27	0	0	0	17	0	0	0	0	13	5	22	0	0	0	2
02:00:00	0	0	2	0	0	0	0	0	16	0	32	0	0	0	17	8	6	20	0	0	9	0	0	8	0	24	0	0	18	0	8	0	0	0	0	0	0	24	0	0	0	0	0	0	19	0	0	0	45
02:30:00	0	0	0	21	0	0	0	0	0	2	6	0	18	36	0	0	7	13	0	26	0	9	0	47	7	0	0	0	3	54	38	0	0	0	23	0	0	0	0	0	23	0	6	0	24	0	0	0	25
03:00:00	0	0	15	23	0	0	0	0	0	18	0	0	10	17	0	0	0	2	0	6	0	0	0	2	23	0	0	0	36	0	0	0	11	0	1	0	0	12	0	13	0	0	34	0	27	0	0	7	1
03:30:00	54	0	28	12	0	0	0	0	32	0	0	0	5	0	0	16	0	0	0	0	0	0	0	45	16	0	18	0	0	0	0	0	42	0	0	0	2	25	30	15	25	2	0	0	24	0	0	2	0
04:00:00	38	0	24	0	0	0	26	0	0	0	2	0	49	0	0	0	0	14	37	0	0	0	0	0	51	0	0	0	0	0	0	0	0	0	32	0	0	0	0	0	2	19	0	3	0	0	0	9	0
04:30:00	19	0	0	0	0	15	8	0	0	0	0	0	5	0	0	0	12	7	8	0	0	0	0	0	8	0	0	0	0	0	0	0	0	41	0	0	20	0	31	0	0	0	0	1	10	0	0	0	0
05:00:00	26	0	0	0	0	17	0	0	0	0	0	0	0	11	0	0	3	0	0	0	0	0	0	0	27	0	0	0	0	1	0	0	0	9	16	0	0	0	0	0	0	0	36	24	0	0	0	27	0
05:30:00	15	0	14	0	0	0	0	0	32	0	0	0	9	4	0	0	9	0	22	0	6	0	0	0	14	0	0	0	0	0	0	0	30	0	0	0	0	0	0	0	0	0	0	0	4	0	0	10	0
06:00:00	0	0	26	12	0	0	0	0	4	0	34	0	0	0	0	24	2	30	1	0	36	0	0	0	15	0	0	0	0	21	24	80	0	0	0	0	0	0	0	0	20	7	0	0	0	0	0	0	29
06:30:00	0	0	1	19	0	0	25	0	39	0	11	0	0	0	0	0	0	0	13	0	16	4	0	0	0	47	0	0	50	30	11	15	0	11	0	27	0	0	11	0	1	11	0	0	0	0	0	0	0
07:00:00	0	0	13	0	0	0	0	0	2	0	0	3	0	0	0	5	9	4	16	29	6	0	36	32	30	23	20	36	5	51	29	29	21	38	29	22	28	4	31	19	32	0	23	16	15	32	10	18	8
07:30:00	14	36	26	0	10	0	0	0	11	16	11	18	12	12	13	0	12	0	0	8	0	0	2	8	9	35	0	17	0	18	3	0	0	2	4	0	13	0	17	5	17	0	11	0	13	0	0	2	8
08:00:00	34	27	26	0	37	0	25	10	16	46	17	25	33	5	19	20	6	6	11	0	20	12	7	21	31	21	0	51	26	0	19	43	12	27	13	20	33	24	3	17	12	4	8	14	13	0	8	0	2
[truncated: 306 more columns]

## Sheet: Fig 4 S1 A (ND AKHR KO)
FED (AKHR-/-)	FED1															FED2																FED3													FED4
20:30:00	16	0	34	0	39	8	19	54	11	3	6	13	0	1	43	0	23	0	26	4	4	1	8	1	1	0	23	31	1	0	8	7	41	9	11	9	27	4	0	36	12	45	35	45	3	6	11	1	18
21:00:00	89	0	29	3	73	13	52	18	27	53	0	35	30	2	56	31	20	7	21	13	6	9	25	22	4	18	38	11	30	14	43	60	104	56	60	89	86	88	75	109	69	49	77	75	33	74	64	35	54
21:30:00	90	21	12	0	90	17	56	12	0	71	0	26	6	2	102	67	1	25	4	16	0	18	36	16	6	9	19	38	25	45	21	24	68	55	62	65	42	37	80	108	64	10	51	89	28	75	45	31	44
22:00:00	20	2	0	0	76	0	16	5	4	47	0	0	3	6	43	16	5	45	1	2	0	13	33	1	18	2	13	14	24	32	0	19	44	36	70	15	18	1	47	95	65	0	30	32	23	7	12	18	25
22:30:00	1	0	0	0	23	0	1	0	0	40	0	0	0	0	51	11	2	34	0	2	0	3	11	4	11	0	0	12	10	32	0	17	11	20	26	1	5	0	25	67	45	0	35	14	23	18	5	11	36
23:00:00	0	0	0	0	0	0	25	13	18	7	0	0	0	6	19	0	0	32	0	3	0	0	6	0	11	0	0	0	0	7	0	2	5	15	27	0	0	4	31	38	41	0	35	2	12	8	0	0	11
23:30:00	0	10	0	0	0	0	32	0	7	27	0	0	0	0	6	1	0	16	0	4	0	1	0	0	2	1	0	0	1	24	0	16	7	13	39	0	22	0	26	46	49	0	12	2	0	2	16	0	11
00:00:00	0	0	0	0	26	0	21	3	6	51	0	0	0	1	31	0	0	16	0	6	0	4	16	0	10	0	0	0	1	0	4	8	13	22	15	0	15	0	19	41	25	0	32	32	8	2	0	0	10
00:30:00	0	0	0	0	52	0	3	0	0	19	0	0	0	0	0	9	0	12	0	5	1	4	11	0	8	1	0	47	2	22	25	1	0	15	7	0	5	0	32	34	9	0	20	24	0	3	4	0	24
01:00:00	0	0	0	0	49	0	45	5	0	83	0	0	0	0	6	0	1	30	0	1	0	5	5	1	7	13	0	15	12	2	0	11	0	7	24	0	32	0	0	50	21	0	5	11	0	9	0	1	18
01:30:00	0	0	0	0	65	0	14	1	0	88	0	0	0	0	26	0	5	10	0	14	0	3	5	6	10	0	0	24	38	17	0	36	0	21	44	0	15	0	26	40	14	0	64	15	0	1	11	1	24
02:00:00	21	0	0	0	36	31	3	9	11	68	0	0	0	0	0	0	0	9	0	55	0	0	24	2	3	0	0	14	0	29	19	10	0	20	39	1	27	24	36	48	57	0	49	43	0	20	3	8	13
02:30:00	0	0	0	0	53	11	5	7	50	54	0	0	0	2	15	0	2	6	3	1	0	0	6	9	26	0	0	1	11	48	26	43	37	12	22	35	4	0	39	37	23	0	21	36	0	18	0	7	15
03:00:00	13	0	0	0	50	7	33	13	0	71	0	0	0	0	67	0	1	17	0	11	0	4	3	2	7	0	0	23	5	32	7	3	15	12	27	22	22	14	15	56	40	0	23	52	0	52	25	11	22
03:30:00	0	1	0	0	55	22	41	2	0	46	0	0	0	7	0	0	7	12	0	2	0	10	13	0	15	0	67	22	16	13	9	17	3	32	31	3	20	22	0	46	30	0	13	0	0	16	5	11	23
04:00:00	0	0	0	0	50	1	39	42	0	32	0	0	0	0	32	0	6	9	0	0	0	0	15	0	0	4	8	0	32	22	15	4	0	0	17	4	8	6	17	34	10	0	3	41	0	0	0	6	7
04:30:00	0	1	0	0	54	20	7	48	9	30	0	0	0	0	0	14	1	27	0	4	3	0	25	0	0	0	0	2	10	49	2	55	0	29	11	5	0	21	17	71	34	0	19	40	0	14	5	15	7
05:00:00	0	0	0	0	0	6	0	55	14	63	0	0	4	0	0	9	0	26	0	20	6	0	24	0	0	0	2	0	12	17	8	19	0	18	38	24	18	0	0	10	25	0	10	40	0	7	32	0	36
05:30:00	0	3	0	0	18	9	3	11	0	67	0	0	0	0	61	17	1	7	0	1	8	19	6	1	3	1	2	22	0	29	0	14	0	18	17	0	25	0	41	71	41	0	63	24	0	3	18	1	16
06:00:00	0	1	0	0	53	0	27	34	21	74	0	33	0	0	73	0	4	29	20	0	9	0	17	87	9	3	2	31	1	17	28	12	36	30	9	0	11	0	5	56	36	0	18	29	0	0	5	3	25
06:30:00	43	0	0	0	33	0	13	0	0	81	0	39	1	0	14	12	4	19	29	15	0	0	25	4	0	21	2	30	0	14	4	43	35	15	21	0	0	0	0	83	32	0	52	22	0	0	13	0	23
07:00:00	33	0	0	0	44	43	20	15	3	78	0	4	0	0	22	29	2	3	0	18	0	0	19	1	11	55	0	0	0	50	0	0	30	56	20	73	0	51	0	74	17	0	8	49	10	77	17	58	26
07:30:00	36	0	0	0	48	33	24	35	0	47	0	21	0	0	26	7	52	11	0	0	0	4	30	0	0	43	32	29	0	40	4	10	24	13	20	82	0	3	18	73	50	0	17	61	34	26	8	11	27
08:00:00	4	0	0	0	61	1	25	15	0	4	0	2	11	1	31	6	4	5	0	1	0	9	17	6	7	0	12	30	19	6	0	60	0	0	28	72	0	21	57	94	58	13	19	58	22	9	41	5	9
08:30:00	14	0	0	0	49	1	51	5	0	15	0	6	0	1	15	2	11	8	1	0	0	2	25	4	10	0	9	0	20	41	0	49	0	16	12	26	51	12	2	98	48	33	11	59	30	35	17	16	47
09:00:00	15	0	6	0	24	50	19	37	15	19	0	33	5	32	67	28	22	23	25	19	0	21	23	24	17	7	48	37	20	19	21	62	81	65	31	27	75	53	23	115	46	62	61	50	42	17	30	42	38
09:30:00	41	0	18	5	54	48	0	25	50	19	51	7	29	34	54	18	17	0	35	26	3	25	26	44	33	0	6	42	0	21	13	63	49	66	28	59	77	28	4	130	16	63	59	50	46	73	41	9	16
10:00:00	34	0	2	0	31	18	25	18	23	12	0	0	37	23	41	5	7	5	0	24	0	25	20	31	14	17	0	1	0	49	8	27	1	43	14	54	55	26	37	106	39	49	30	39	22	26	34	12	38
10:30:00	25	0	3	0	36	37	2	0	0	9	1	24	21	18	42	15	10	0	39	14	0	5	6	26	30	0	18	8	0	15	18	44	58	24	26	5	52	16	2	99	16	46	0	33	17	40	16	36	14
11:00:00	0	2	4	0	34	1	65	36	0	3	0	14	0	18	19	2	10	0	0	16	0	0	7	22	12	0	0	0	0	16	24	45	1	30	9	22	44	34	12	96	29	37	38	38	18	59	15	24	26
11:30:00	16	0	9	0	11	21	28	0	49	11	0	0	33	2	0	4	1	0	6	4	0	2	11	14	6	0	3	21	28	35	0	0	0	37	20	0	21	22	43	78	0	37	0	46	0	38	10	15	6
12:00:00	0	0	0	3	6	5	0	38	13	6	0	2	5	0	6	5	28	0	3	9	15	8	3	11	7	0	9	0	54	1	0	16	0	0	13	12	0	12	19	80	9	26	4	17	10	40	0	0	12
12:30:00	5	0	22	0	31	38	2	51	7	0	0	32	9	2	36	6	0	0	0	0	0	2	30	6	10	6	16	29	50	8	4	7	30	2	0	0	31	22	0	62	0	35	65	5	0	0	0	0	0
13:00:00	6	1	0	0	5	0	0	9	4	42	0	0	0	7	17	22	4	0	0	2	0	1	10	9	6	0	3	2	48	0	23	4	6	24	32	0	36	9	2	50	32	26	0	2	0	0	0	0	22
13:30:00	11	0	0	0	2	9	10	13	9	27	19	0	14	0	0	5	0	0	0	0	0	1	1	9	3	0	2	6	30	32	10	23	0	0	12	40	6	11	2	68	0	17	50	2	24	11	27	32	9
14:00:00	0	0	12	0	12	0	29	33	2	1	0	2	5	0	23	0	1	0	0	0	10	5	1	10	7	0	4	3	13	20	11	0	0	0	8	0	11	27	4	8	2	4	13	13	9	51	18	19	10
14:30:00	5	0	0	0	2	42	15	4	0	44	0	12	2	0	7	0	1	0	0	0	17	0	0	4	5	0	0	0	16	23	4	27	0	4	4	0	5	13	0	0	12	0	4	11	0	0	0	0	4
15:00:00	20	0	15	0	4	0	2	0	6	27	0	24	2	0	13	2	21	0	0	44	0	0	6	4	0	0	0	0	0	7	1	15	0	0	57	6	0	0	0	0	23	0	0	16	3	0	0	0	14
15:30:00	50	0	0	0	15	9	0	11	0	18	0	1	22	9	4	2	0	0	0	4	0	0	14	10	0	0	0	9	0	5	9	18	0	0	0	3	22	5	0	9	0	0	0	8	0	1	24	0	0
16:00:00	31	0	7	0	25	11	36	0	6	0	0	5	0	0	8	2	9	1	1	15	0	2	11	13	2	0	4	28	29	19	1	22	0	16	31	2	2	0	0	2	0	0	0	3	19	19	0	17	21
16:30:00	4	0	0	0	0	4	0	17	0	11	0	0	2	6	2	3	0	0	0	0	0	2	0	2	4	0	2	4	29	3	0	17	0	1	33	5	9	0	0	14	0	0	0	0	1	2	8	7	0
17:00:00	8	0	0	0	3	7	0	5	3	1	0	30	2	0	26	4	9	0	0	12	0	0	6	11	7	1	2	0	1	18	15	0	0	3	8	8	1	0	0	0	0	0	2	11	0	2	2	0	7
17:30:00	1	0	0	3	0	2	0	8	15	7	0	4	3	1	1	8	4	0	1	0	0	4	0	15	12	12	2	3	0	9	11	3	17	29	12	2	16	0	29	0	0	36	12	27	0	1	11	2	6
18:00:00	3	0	0	5	34	23	0	20	2	13	0	12	0	0	28	2	13	1	4	0	8	6	0	3	3	0	2	5	0	17	0	11	0	0	3	0	18	5	6	2	1	16	0	14	0	0	2	0	2
18:30:00	3	0	20	19	21	0	0	9	1	61	0	7	0	0	12	4	5	7	0	4	2	4	0	7	6	3	2	6	0	1	14	2	4	0	12	0	13	8	9	0	0	19	38	0	0	3	9	1	2
19:00:00	8	0	0	1	12	9	0	21	4	44	0	12	1	23	18	12	1	0	0	11	7	25	0	37	14	0	12	48	0	13	9	10	34	0	8	0	4	4	12	14	11	26	19	14	0	46	10	13	42
19:30:00	5	0	27	0	35	30	40	26	2	25	68	27	6	1	33	11	22	1	0	39	5	0	1	17	2	8	17	21	18	1	24	32	6	13	20	0	18	0	10	70	38	18	21	42	8	36	26	1	15
20:00:00	16	0	24	8	37	32	50	49	42	44	0	26	4	12	43	20	21	5	14	37	0	23	15	16	19	0	23	36	45	27	13	48	4	13	20	3	46	21	27	55	38	43	10	36	88	46	32	15	14
20:30:00	18	0	32	1	45	39	48	37	52	60	2	63	45	9	31	23	8	8	61	41	0	12	31	23	26	7	30	26	38	50	26	44	15	21	25	12	42	45	5	72	46	49	42	39	16	66	28	21	34
21:00:00	58	0	65	22	66	87	78	75	48	77	46	91	85	60	80	69	36	37	76	63	20	37	77	71	36	36	66	46	78	56	54	81	79	82	79	144	118	78	67	161	56	57	93	107	60	108	78	96	88
21:30:00	64	0	14	13	87	66	78	54	24	98	27	13	50	23	66	52	23	38	46	45	38	33	55	57	18	29	1	30	85	41	22	69	81	56	55	132	94	60	65	103	52	34	82	32	29	86	74	120	79
22:00:00	38	0	0	0	73	48	13	53	0	75	0	0	27	5	31	40	5	17	25	14	16	14	38	9	8	21	0	18	63	40	2	77	37	67	80	50	58	52	67	141	66	8	40	17	23	26	65	29	44
22:30:00	4	0	0	0	16	14	13	0	0	44	0	0	0	7	0	5	20	21	25	7	1	0	17	8	0	0	0	31	23	25	0	12	57	8	31	37	14	3	34	100	26	0	14	1	11	0	29	46	23
23:00:00	4	0	0	0	2	24	53	0	0	33	0	0	0	4	0	0	19	14	106	4	0	0	5	2	0	0	0	0	14	30	0	7	0	11	36	30	1	0	0	75	15	2	28	0	0	0	31	8	15
23:30:00	4	0	0	0	8	0	1	0	0	53	0	0	0	1	0	0	10	16	11	16	0	0	3	0	7	0	0	7	0	20	0	5	0	21	17	2	5	0	0	89	26	1	10	9	7	0	13	20	18
00:00:00	0	0	0	0	52	7	0	2	0	19	0	0	1	0	0	6	2	14	0	4	0	0	24	0	0	0	0	27	0	27	0	17	0	6	35	2	41	0	0	67	8	0	16	19	0	0	21	8	28
00:30:00	0	0	0	0	38	4	0	40	0	80	0	0	0	0	0	9	21	16	0	1	0	20	17	0	6	0	0	24	0	15	0	23	49	28	8	35	24	19	0	65	19	0	32	22	51	33	17	6	22
01:00:00	28	0	0	0	45	44	0	16	0	53	0	7	0	0	0	0	9	27	4	10	0	7	12	5	15	0	0	49	0	52	0	21	2	25	82	51	42	39	0	80	32	1	28	31	13	28	25	15	22
01:30:00	4	0	0	0	56	38	3	30	0	3	1	0	0	34	0	0	12	13	8	15	0	18	14	6	7	7	0	28	43	16	0	31	23	0	41	19	35	36	1	90	1	5	7	25	30	31	14	26	30
02:00:00	0	0	0	0	53	0	37	17	0	68	0	0	0	12	0	0	36	13	0	14	20	0	39	0	16	32	0	0	13	0	2	38	4	42	36	0	41	19	64	84	19	2	21	29	27	0	11	11	25
02:30:00	0	0	0	0	53	13	19	7	0	27	0	0	0	0	0	67	15	15	32	0	0	17	25	6	8	10	0	30	0	27	30	10	8	28	29	0	47	39	1	58	24	21	0	22	15	20	25	47	26
03:00:00	0	0	0	0	40	10	31	0	0	96	17	0	0	0	0	37	6	10	121	6	11	27	2	5	15	9	0	0	0	35	34	34	66	43	62	23	19	8	51	71	13	21	0	8	30	7	7	15	18
03:30:00	0	0	0	0	55	21	0	9	0	95	5	0	7	0	0	9	20	13	28	8	1	0	8	4	7	3	0	23	0	43	27	0	10	31	23	67	36	6	57	84	7	4	29	21	28	63	15	0	12
04:00:00	0	0	0	0	0	16	0	15	0	57	0	0	42	0	0	7	0	40	1	5	0	0	0	6	7	2	0	48	0	29	0	40	0	51	42	0	0	14	13	85	17	0	3	6	19	43	29	17	39
04:30:00	21	0	0	0	0	21	0	35	0	32	2	0	0	0	1	12	4	6	14	5	0	7	0	17	0	0	24	14	1	13	0	0	7	0	21	60	0	11	20	62	37	6	31	37	19	0	30	0	12
05:00:00	17	0	0	0	0	25	41	11	0	55	24	0	39	0	58	13	0	20	11	12	0	0	0	6	48	0	29	14	0	22	0	41	52	46	6	12	39	19	50	84	36	2	28	21	8	0	31	20	16
05:30:00	0	0	0	0	0	39	39	11	0	7	12	0	10	19	17	13	8	7	2	6	26	21	9	37	35	0	19	12	0	38	0	44	36	8	49	57	17	21	4	90	28	0	8	12	28	58	27	20	23
06:00:00	47	0	0	0	58	3	0	25	0	67	0	0	0	0	24	35	4	16	9	6	3	27	29	13	23	13	3	44	0	21	0	51	17	51	32	70	0	22	21	87	15	15	21	4	24	79	28	16	34
06:30:00	0	0	0	0	45	21	18	13	0	28	28	0	9	0	39	0	17	5	41	5	0	0	7	2	14	18	6	12	26	20	37	25	2	16	25	44	69	19	42	94	22	8	45	8	36	45	25	13	64
07:00:00	84	0	11	0	49	43	29	9	0	52	16	0	24	3	28	15	3	16	9	31	0	0	22	10	0	8	0	29	22	35	4	17	30	50	15	42	33	62	25	103	20	6	23	40	38	31	9	7	19
07:30:00	24	0	5	0	54	13	20	27	0	35	1	0	0	12	20	0	0	6	43	1	0	31	31	3	15	19	0	10	33	32	6	58	39	22	25	66	42	34	0	85	27	4	31	32	33	33	24	20	20
08:00:00	11	0	0	0	53	55	4	49	0	25	0	0	13	1	12	14	0	14	7	4	0	0	56	2	10	0	2	48	18	38	1	68	69	66	21	32	36	37	39	95	17	11	19	21	22	10	13	27	11
08:30:00	21	0	5	0	65	51	19	30	0	58	2	0	0	0	30	39	28	18	19	6	0	6	29	8	28	0	17	35	21	33	11	25	0	0	32	34	21	0	0	110	20	4	17	41	31	1	16	17	40
09:00:00	20	0	2	1	53	33	84	22	1	57	2	29	39	23	27	41	22	26	24	19	5	19	29	20	20	29	47	22	47	18	14	55	80	74	48	77	49	48	55	117	34	44	45	28	27	91	37	38	55
09:30:00	18	0	50	0	20	68	64	62	0	44	10	68	49	29	33	23	41	11	17	41	27	30	45	77	17	12	40	31	41	25	25	81	5	38	30	83	72	39	30	123	32	50	54	5	12	76	26	53	24
10:00:00	5	0	25	0	25	40	46	37	5	43	11	33	16	4	20	27	17	23	30	8	18	24	28	43	13	0	24	19	56	22	27	69	0	9	15	40	38	14	11	90	25	45	72	17	16	60	17	0	15
10:30:00	0	0	13	0	24	15	25	34	4	29	11	0	43	8	26	22	13	16	1	13	6	21	22	46	28	26	0	0	45	3	11	51	43	6	13	42	17	17	37	90	12	39	40	10	26	56	10	10	17
11:00:00	30	0	14	0	42	12	41	5	0	33	13	23	17	2	25	6	2	7	2	10	0	14	14	27	19	9	19	11	26	15	18	21	0	16	7	9	15	4	4	77	12	23	33	15	24	42	15	12	30
11:30:00	21	0	15	0	10	16	21	28	0	13	10	0	22	0	22	16	16	0	0	27	11	13	13	33	53	6	9	2	34	2	4	31	0	9	2	20	88	31	15	58	13	33	14	25	6	14	10	16	69
12:00:00	5	0	4	4	17	6	19	7	1	56	7	25	8	0	7	6	2	0	0	5	4	16	21	23	8	16	2	0	16	7	0	2	17	2	20	16	17	12	8	19	28	28	16	7	6	3	3	10	0
12:30:00	14	0	0	0	5	17	15	25	49	13	3	0	12	0	13	13	6	11	0	3	6	28	4	14	5	3	13	11	0	31	20	28	3	4	36	13	10	0	0	12	0	33	59	8	0	44	23	3	12
13:00:00	3	0	5	0	14	4	0	6	34	28	8	20	18	0	8	8	7	25	0	2	3	6	2	23	9	0	3	2	5	36	11	21	0	2	2	0	2	3	3	2	0	16	4	1	22	11	0	9	6
13:30:00	2	0	18	0	8	0	0	36	2	19	8	24	3	7	13	2	0	0	0	0	0	10	5	12	0	0	10	0	25	0	0	4	2	0	0	0	10	19	2	1	4	13	0	24	10	0	0	0	2
14:00:00	14	0	0	5	11	30	0	14	0	19	0	17	6	0	17	6	3	0	0	0	0	4	9	11	7	0	2	2	1	0	6	18	0	0	6	0	5	19	0	0	0	0	0	15	25	20	0	0	14
14:30:00	0	0	0	11	2	0	0	25	0	9	0	19	9	0	8	3	2	0	0	0	2	14	0	8	0	0	0	2	0	30	23	0	0	0	9	0	14	6	4	0	7	24	0	16	0	17	0	6	12
15:00:00	0	0	0	0	0	15	31	24	12	20	3	14	1	5	0	11	6	0	0	0	3	10	0	18	0	10	0	4	0	27	5	0	0	0	7	0	7	0	1	0	1	13	0	16	0	0	0	0	16
15:30:00	0	0	0	0	0	3	0	0	2	47	0	15	2	9	18	6	4	0	0	0	0	10	0	8	3	2	0	21	0	12	12	0	0	0	12	0	2	9	0	0	3	7	11	1	0	0	0	0	1
16:00:00	14	0	0	0	0	6	0	4	23	10	4	0	0	2	15	2	4	20	0	0	0	22	0	7	16	10	0	5	0	34	4	0	0	0	5	0	0	0	0	0	6	0	26	37	8	44	10	7	7
16:30:00	0	0	0	0	0	4	0	24	3	8	1	14	0	0	3	2	3	35	0	0	4	9	0	14	5	0	18	2	0	6	14	6	0	0	13	0	20	14	0	0	2	26	0	41	16	0	0	7	11
17:00:00	0	0	0	0	0	0	0	0	21	28	4	4	0	0	0	2	1	2	0	2	0	13	0	38	23	0	9	2	0	0	1	0	0	0	11	0	6	2	6	0	6	21	0	28	0	0	0	0	2
17:30:00	6	0	0	0	0	0	4	3	25	10	0	3	0	0	2	26	17	0	2	0	6	5	0	14	4	0	0	0	0	6	4	0	0	0	6	0	0	0	0	0	8	6	0	0	0	13	0	0	10
18:00:00	0	0	0	0	0	0	0	20	1	26	1	23	0	0	8	6	23	3	0	5	0	31	0	4	13	0	4	2	0	9	8	11	0	0	0	0	27	0	0	2	2	23	30	2	0	47	0	4	6
18:30:00	8	0	0	0	9	29	46	18	14	5	3	22	0	0	35	18	11	14	0	42	1	5	0	0	0	18	6	6	11	2	8	8	0	3	3	0	8	0	0	1	4	12	0	13	0	33	0	0	29
19:00:00	6	0	7	0	29	28	15	24	9	29	11	26	0	3	20	14	9	5	36	31	1	8	0	15	11	19	20	11	29	20	4	10	0	2	18	0	18	19	0	0	12	20	0	27	0	30	3	0	38
19:30:00	40	0	25	21	43	48	46	31	40	62	9	44	36	26	54	17	32	23	25	20	11	30	11	10	19	19	35	18	27	8	3	12	5	10	23	14	10	21	2	37	41	26	18	18	12	52	11	19	26
20:00:00	10	0	25	0	39	33	50	23	46	48	5	51	32	19	40	28	55	19	15	37	15	22	17	21	13	6	26	5	39	27	29	53	5	25	23	19	23	20	5	60	56	5	4	32	20	46	34	44	15
20:30:00	31	0	60	8	42	38	53	56	53	56	24	51	54	22	47	30	24	24	15	38	14	19	32	37	10	6	36	24	62	33	23	75	33	37	29	75	50	39	70	84	42	2	65	44	33	69	24	38	14
21:00:00	57	0	71	16	76	59	60	69	70	77	42	78	82	50	74	75	42	68	46	57	33	50	48	80	33	56	57	41	85	47	54	108	92	87	133	188	126	75	100	194	72	62	113	97	53	118	105	102	107
21:30:00	51	0	36	28	103	66	61	70	65	95	8	32	95	45	81	158	20	68	41	94	39	23	78	86	33	34	4	63	96	72	22	66	80	107	73	137	74	47	81	138	47	47	73	46	30	97	70	69	61
22:00:00	33	0	0	0	63	29	26	66	0	50	26	25	8	52	75	55	30	40	4	17	9	7	27	6	19	16	13	33	44	56	0	8	51	22	36	38	60	19	61	118	38	6	44	53	29	40	42	2	42
22:30:00	0	0	0	0	54	17	1	12	0	44	0	0	0	17	0	3	11	38	2	37	2	7	24	6	10	26	0	44	43	34	0	24	0	1	21	10	1	35	31	38	2	0	14	19	0	0	25	0	13
23:00:00	0	0	0	0	57	1	0	36	0	26	2	0	0	0	0	0	6	36	0	5	0	3	14	5	2	0	0	30	0	37	0	0	0	0	17	0	35	9	37	35	0	1	18	0	0	0	21	0	14
23:30:00	0	0	0	0	41	0	0	13	0	53	14	0	0	15	0	0	9	51	4	2	0	0	21	0	0	0	0	28	0	30	0	0	0	0	0	1	4	13	0	2	0	20	19	0	0	0	22	0	2
00:00:00	0	0	0	0	30	39	0	44	0	80	0	0	0	1	0	0	33	30	4	4	0	15	8	0	0	0	0	20	0	35	0	0	0	0	14	0	38	27	0	52	0	10	20	1	0	0	15	0	46
00:30:00	0	0	0	0	3	10	12	45	0	70	9	0	0	20	0	0	14	9	0	31	0	0	13	0	6	0	0	52	55	35	0	21	0	0	18	0	0	0	0	50	32	7	4	0	0	0	20	0	13
01:00:00	31	0	0	0	0	0	12	32	0	43	18	0	0	7	0	0	9	21	16	4	0	0	43	36	10	0	0	27	53	30	0	0	0	35	8	0	0	5	14	20	50	0	22	9	0	0	70	0	0
01:30:00	2	0	0	0	0	15	10	51	0	33	2	0	0	9	0	10	0	22	65	11	6	0	8	2	36	0	0	18	13	37	0	0	0	5	19	0	0	22	25	16	5	0	19	26	0	0	19	0	11
02:00:00	1	0	0	0	62	34	57	36	0	60	30	12	0	10	0	13	0	19	0	44	2	0	0	2	22	0	0	54	0	28	0	0	0	11	27	0	11	3	20	2	20	6	12	12	0	60	21	0	42
02:30:00	24	0	0	0	13	7	41	43	0	74	2	24	0	40	0	19	9	32	0	35	15	0	0	6	5	0	0	30	0	28	0	0	0	29	22	0	37	0	18	74	37	1	0	33	6	19	21	0	22
03:00:00	19	0	0	0	51	16	55	53	0	27	10	7	0	20	0	0	24	24	0	30	6	0	15	15	8	2	0	60	0	34	0	22	0	4	25	1	28	2	4	30	10	1	0	18	16	20	28	0	24
03:30:00	0	0	0	0	53	8	52	34	0	22	0	0	48	18	0	0	19	26	0	19	6	17	5	11	32	13	0	26	0	33	8	0	26	0	5	0	8	68	0	49	38	7	21	17	20	13	11	0	44
04:00:00	0	0	3	0	63	25	22	50	0	35	0	10	14	5	0	0	7	25	0	27	8	0	23	28	6	10	0	49	0	27	0	45	27	0	0	35	11	12	47	42	35	9	22	37	14	21	17	0	30
04:30:00	0	0	0	0	64	18	9	25	0	61	10	0	2	4	0	0	29	24	0	41	0	0	16	0	0	32	84	19	0	9	25	23	8	0	42	53	3	15	22	29	30	18	27	22	1	89	10	13	7
05:00:00	0	0	0	0	28	14	15	26	0	64	0	26	0	12	0	0	11	23	0	17	11	0	21	0	1	19	12	58	0	10	29	16	7	0	43	25	76	15	29	61	23	0	21	26	17	0	15	8	10
05:30:00	39	0	0	0	50	34	4	23	0	63	0	0	31	22	53	0	7	21	0	17	0	0	5	23	20	10	0	29	0	50	0	69	0	48	17	19	2	9	18	83	45	0	2	12	18	0	22	13	23
06:00:00	32	0	0	0	61	35	42	11	0	42	9	0	29	13	20	29	23	11	0	36	0	6	16	0	14	17	0	28	61	33	3	24	0	38	49	86	10	22	8	69	31	15	18	19	16	56	17	30	25
06:30:00	7	0	0	0	52	18	33	37	0	3	0	22	7	4	39	18	0	22	7	24	0	15	24	0	14	0	20	47	45	29	6	1	25	62	17	2	0	19	62	73	16	13	30	46	42	52	24	50	23
07:00:00	8	0	0	0	31	42	46	9	6	0	5	0	0	17	25	14	26	39	5	24	0	0	18	0	8	0	4	21	35	42	2	40	49	1	28	22	2	14	15	92	36	0	37	50	23	24	23	0	25
07:30:00	17	0	0	3	22	30	0	22	26	59	5	0	62	7	32	29	22	15	0	24	0	10	40	8	18	14	9	47	3	53	18	20	12	0	22	15	39	11	50	74	26	2	2	37	19	42	31	36	12
08:00:00	14	0	0	8	2	29	53	9	1	0	2	0	3	12	19	31	2	9	33	29	9	13	26	0	6	24	17	34	0	41	5	60	96	50	21	39	9	18	59	75	32	0	43	82	23	32	29	11	23
[truncated: 102 more columns]

## Sheet: Fig 4 S1 B (HFD AKHR KO)
FED (AKHR-/-)	FED1															FED2															FED3															+sucrose	+sucrose SEM	+sucrose survival
20:30:00	2	42	21	21	27	30	0	8	7	4	10	48	16	19	12	1	16	15	11	4	6	16	18	38	17	9	22	11	5	0	25	49	27	64	0	0	30	22	0	15	0	15	29	12		16.9091	2.22204	1
21:00:00	45	79	61	31	66	107	92	55	72	59	59	71	42	78	34	74	43	60	54	5	50	83	97	84	56	66	64	60	78	96	85	60	98	37	39	60	8	67	58	53	45	43	33	73		60.9091	3.35856	1
21:30:00	52	15	25	8	74	95	70	13	80	37	53	91	14	72	29	77	59	68	41	56	8	66	83	37	18	14	74	9	57	93	73	51	87	48	29	42	1	54	43	28	36	69	48	44		48.6591	3.97188	1
22:00:00	51	26	16	9	64	34	58	7	69	16	29	72	7	66	0	11	11	44	21	10	3	19	59	0	3	0	29	0	52	66	77	28	76	20	32	4	2	78	21	0	12	43	41	14		29.5455	3.85554	1
22:30:00	39	14	0	28	32	22	40	0	61	8	22	56	2	36	0	4	9	30	2	38	0	7	44	0	0	0	12	11	20	28	49	14	39	0	18	0	1	53	4	0	14	18	15	6		18.0909	2.70479	1
23:00:00	19	28	13	6	4	0	40	0	37	11	22	42	0	54	0	3	23	11	0	9	5	1	9	0	0	0	15	21	0	10	49	26	14	0	4	0	3	28	7	0	5	0	0	0		11.7955	2.21316	1
23:30:00	1	0	6	0	8	0	0	0	68	14	67	21	0	29	34	0	1	17	0	5	0	0	0	0	0	0	1	25	0	45	57	8	60	0	6	9	0	40	0	0	8	22	0	4		12.6364	2.99596	1
00:00:00	8	0	0	27	43	0	0	0	45	8	57	49	0	49	0	27	0	4	0	31	0	19	14	0	0	0	27	3	0	9	23	15	0	0	23	23	1	29	0	0	0	42	0	0		13.0909	2.59509	1
00:30:00	29	0	3	0	9	0	0	0	41	33	27	1	0	22	30	6	0	19	0	3	4	38	60	0	0	27	15	0	0	56	58	11	0	0	16	22	0	0	0	0	13	2	0	39		13.2727	2.67503	1
01:00:00	0	2	0	0	6	0	0	0	50	10	10	0	0	0	1	0	14	4	0	46	0	33	32	0	0	36	29	31	0	13	15	10	44	0	17	34	0	15	0	0	13	22	0	11		11.3182	2.24286	1
01:30:00	11	0	28	0	7	0	0	0	62	7	26	0	0	1	0	0	12	21	0	13	4	13	34	0	0	18	52	2	0	12	0	0	65	0	15	0	0	52	0	3	0	3	39	35		12.1591	2.74034	1
02:00:00	7	39	11	36	18	7	11	0	75	3	61	0	0	9	44	0	7	34	0	31	3	31	49	0	0	0	2	0	0	88	1	27	34	0	21	0	0	21	0	8	23	45	28	10		17.8182	3.28673	1
02:30:00	26	11	0	2	14	0	16	0	32	8	37	77	1	5	22	2	26	14	0	0	2	7	46	2	2	0	29	31	26	35	38	66	38	0	6	16	54	15	0	5	0	17	50	13		17.9773	2.93922	1
03:00:00	0	14	0	1	7	0	27	0	52	22	12	84	1	43	0	12	13	28	0	38	0	0	0	0	27	0	47	30	29	31	34	41	1	0	0	3	4	10	10	0	0	27	0	40		15.6364	2.91059	1
03:30:00	21	16	0	28	4	0	37	0	5	0	28	97	9	54	0	50	0	8	9	0	0	30	23	0	0	0	2	0	0	13	29	38	0	0	4	0	4	0	0	4	0	4	0	0		11.75	2.96226	1
04:00:00	51	0	19	0	25	33	36	0	0	23	0	31	0	48	0	8	38	20	0	15	64	47	20	0	0	0	44	39	0	46	10	30	32	0	9	0	2	0	1	0	0	0	21	0		16.1818	2.83501	1
04:30:00	55	0	0	0	2	42	43	9	0	3	0	61	17	47	0	0	2	6	48	0	11	31	18	0	13	0	6	25	0	38	52	0	47	0	54	0	0	38	2	0	0	0	28	41		16.7955	3.11047	1
05:00:00	42	31	15	13	10	30	28	0	45	11	0	37	0	42	5	0	0	34	41	0	0	14	20	0	0	0	15	0	0	10	39	11	35	0	17	27	14	52	0	3	0	0	17	3		15.0227	2.42509	1
05:30:00	18	35	0	6	23	52	40	0	69	0	2	70	0	51	14	0	0	11	42	49	2	52	0	0	0	0	27	38	0	19	59	23	33	0	28	15	1	6	7	0	0	0	26	0		18.5909	3.25702	1
06:00:00	0	26	7	8	6	42	0	0	43	21	63	0	0	17	0	0	0	24	0	2	24	32	0	0	0	0	0	0	0	0	25	9	40	0	16	0	0	47		3	0	0	0	22		11.093	2.50024	0.977273
06:30:00	13	0	13	0	18	16	0	0	6	0	27	53	0	0	34	0	0	9	0	20	109	2	0	0	0	0	0	0	0	44	0	3	3	0	13	0	0	0		44	0	0	0	19		10.3721	3.14014	0.977273
07:00:00	27	1	15	31	16	0	33	0	15	18	38	27	2	1	0	0	1	29	0	17	12	6	42	0	0	40	25	24	0	45	47	0	0	0	43	0	27	0		0	8	0	1	6		13.8837	2.40988	0.977273
07:30:00	18	51	18	34	13	0	0	0	60	20	0	48	12	2	7	0	11	3	0	0	0	16	61	0	0	20	45	5	0	45	0	0	43	0	25	0	2	0		0	28	60	59	0		16.4186	3.19264	0.977273
08:00:00	44	20	3	23	23	0	8	7	14	23	14	10	0	2	5	0	48	31	0	13	0	2	30	0	0	0	8	0	0	18	11	0	24	0	0	17	7	0		2	0	34	11	37		11.3721	2.02641	0.977273
08:30:00	38	4	28	8	28	56	24	2	3	2	0	72	0	8	16	20	36	50	0	45	0	16	0	0	0	14	19	0	0	11	34	0	40	0	17	47	0	0		0	0	47	10	0		16.1628	2.95873	0.977273
09:00:00	31	89	59	41	38	63	79	15	37	41	68	71	39	63	53	73	45	43	35	29	84	54	54	31	27	47	15	70	51	58	39	73	33	52	33	35	84	68		53	44	17	70	27		49.5581	2.95543	0.977273
09:30:00	25	28	46	15	40	53	10	13	57	28	63	59	38	6	40	19	0	62	11	33	67	14	31	26	44	46	16	37	27	45	42	37	53	54	23	34	78	35		72	23	30	45	9		35.6744	2.88247	0.977273
10:00:00	47	21	16	17	30	35	31	16	46	12	15	48	40	30	36	0	39	38	8	11	21	8	16	26	47	21	24	0	23	24	43	34	57	60	39	16	66	41		28	19	7	73	17		28.9767	2.62189	0.977273
10:30:00	36	4	0	18	20	23	25	0	20	12	11	55	8	28	36	39	9	42	17	27	28	22	22	16	26	1	0	35	6	15	45	27	28	46	27	44	49	22		37	0	30	41	22		23.6977	2.2409	0.977273
11:00:00	22	5	33	12	10	14	6	12	8	0	31	35	43	37	36	36	12	34	21	7	6	6	12	6	12	11	19	0	5	14	43	15	36	28	11	13	14	27		34	16	24	20	28		18.9302	1.86754	0.977273
11:30:00	0	20	0	0	11	20	89	7	0	1	12	37	12	12	0	29	27	34	2	7	0	2	25	19	16	12	6	8	18	27	0	32	24	44	16	0	30	37		4	0	16	6	16		15.7674	2.57229	0.977273
12:00:00	0	11	0	15	2	4	0	1	0	6	12	34	0	0	0	0	0	6	0	3	15	0	2	27	0	0	2	0	6	10	33	27	23	13	15	32	30	5		27	56	10	18	15		10.6977	1.98682	0.977273
12:30:00	0	9	29	6	6	4	20	9	0	0	7	40	26	34	42	0	0	18	4	3	0	0	6	16	0	15	0	8	0	2	31	26	12	10	14	3	18	52		26	3	34	49	0		13.5349	2.25072	0.977273
13:00:00	14	0	21	0	7	0	6	5	0	0	16	17	0	13	5	12	0	9	3	6	7	2	7	0	20	12	3	0	6	2	8	6	13	18	8	13	19	6		8	1	17	11	3		7.53488	0.974963	0.977273
13:30:00	5	11	0	14	0	4	30	0	0	0	26	10	0	17	5	3	14	0	0	2	44	2	32	0	5	3	0	0	2	0	0	9	19	26	3	10	33	63		0	4	0	6	4		9.44186	2.11499	0.977273
14:00:00	0	32	2	0	2	17	24	7	0	13	25	23	16	6	13	19	5	8	16	0	6	2	11	15	0	5	6	6	0	6	23	26	9	46	13	0	23	26		1	0	1	50	8		11.8837	1.85648	0.977273
14:30:00	4	1	0	8	4	14	0	0	0	0	0	3	0	0	0	0	0	3	0	0	0	2	6	24	2	0	0	0	2	59	24	53	11	7	9	12	15	24		14	13	16	0	7		7.83721	1.97238	0.977273
15:00:00	0	11	0	0	0	3	0	0	0	0	17	31	4	4	12	0	4	3	0	0	0	0	4	0	3	30	0	2	2	11	3	7	2	18	9	0	1	19		35	0	13	1	6		5.93023	1.36861	0.977273
15:30:00	0	30	0	0	0	0	4	1	0	0	0	13	0	0	41	0	0	16	0	0	14	5	2	0	0	0	0	0	12	0	31	5	3	55	11	6	13	35		7	25	0	5	0		7.76744	1.97824	0.977273
16:00:00	0	4	14	0	29	2	0	3	0	3	0	9	0	0	26	0	2	8	4	0	19	0	12	0	0	9	0	4	10	4	16	23	9	12	2	0	7	55		38	43	0	3	20		9.06977	1.95276	0.977273
16:30:00	0	0	4	4	12	4	3	2	15	0	0	12	20	22	1	2	11	3	0	0	0	4	6	0	0	0	0	0	0	1	0	19	17	0	7	22	42	19		2	21	0	0	2		6.44186	1.41551	0.977273
17:00:00	0	6	2	0	0	0	0	0	9	0	0	30	0	12	0	0	0	15	7	0	1	1	27	0	0	0	0	15	0	0	0	0	7	17	11	0	16	11		1	5	0	1	2		4.55814	1.14522	0.977273
17:30:00	0	48	7	21	21	21	26	7	36	0	23	9	31	18	15	20	47	22	11	0	43	0	10	0	23	12	17	33	24	10	0	36	11	12	16	17	27	27		22	12	0	6	4		17.3256	1.97485	0.977273
18:00:00	0	0	11	3	0	2	21	0	0	6	0	16	0	14	7	0	1	17	0	0	23	2	19	41	0	23	0	0	121	17	26	17	42	23	14	0	18	13		9	0	0	0	14		12.093	3.10143	0.977273
18:30:00	0	2	4	8	2	5	13	25	0	1	2	23	4	0	6	0	6	0	0	0	4	2	5	0	0	7	0	19	4	3	28	2	16	55	10	3	14	33		11	3	0	25	0		8.02326	1.73859	0.977273
19:00:00	6	26	5	3	2	17	0	3	23	1	16	35	4	21	3	0	2	14	0	0	9	0	10	7	0	15	0	7	4	5	33	18	47	53	17	11	24	34		18	1	35	4	5		12.5116	2.06521	0.977273
19:30:00	0	18	19	19	10	31	23	4	17	17	6	48	10	1	40	2	2	17	1	0	19	4	27	41	1	24	1	36	13	18	26	24	45	43	23	21	60	30		43	23	25	26	10		20.186	2.30274	0.977273
20:00:00	16	42	19	18	24	32	24	11	12	1	15	48	4	30	33	33	10	28	19	4	44	28	32	30	23	2	23	32	22	33	0	48	36	52	13	0	25	33		22	6	21	2	10		22.3256	2.12477	0.977273
20:30:00	37	42	9	24	27	36	26	13	25	4	28	39	28	31	28	39	12	27	27	10	38	41	19	30	27	27	24	43	33	40	34	36	30	38	26	29	36	46		32	18	30	27	18		28.6977	1.47498	0.977273
21:00:00	85	135	58	98	103	144	74	59	97	63	86	117	64	100	56	112	82	110	91	101	109	88	97	71	96	128	74	45	80	127	107	116	107	26	77	82	23	112		80	52	79	59	75		87.093	4.14398	0.977273
21:30:00	75	16	24	3	35	116	0	13	54	27	44	108	6	91	48	46	28	99	12	74	28	6	55	0	13	0	38	0	32	80	65	42	20	21	39	33	0	100		1	17	44	3	94		38.3721	5.1329	0.977273
22:00:00	38	0	9	0	30	30	0	8	36	18	44	71	3	49	3	2	0	106	0	5	0	18	64	0	0	0	7	0	12	16	77	26	7	9	8	2	2	14		0	0	2	48	22		18.2791	3.79183	0.977273
22:30:00	21	0	1	0	1	0	0	0	9	1	14	69	0	114	0	0	0	62	0	6	0	11	34	0	0	0	28	0	0	0	54	47	13	0	5	0	0	4		0	0	0	3	0		11.5581	3.64683	0.977273
23:00:00	14	2	0	8	36	0	0	0	12	0	0	18	0	31	2	0	0	24	0	0	0	15	0	0	0	0	0	0	0	0	0	5	16	0	0	0	0	0		0	0	0	5	0		4.37209	1.34725	0.977273
23:30:00	38	0	4	1	13	0	0	2	43	0	0	80	0	1	0	0	0	27	0	0	0	2	0	0	0	0	0	0	0	0	26	0	46	0	0	1	9	0		0	0	0	42	0		7.7907	2.64608	0.977273
00:00:00	2	0	0	6	0	0	0	0	16	7	17	29	0	0	26	0	0	17	0	0	0	20	0	0	0	0	0	0	17	0	20	0	44	0	11	0	0	17		0	46	0	5	0		6.97674	1.81097	0.977273
00:30:00	27	0	17	7	0	0	0	0	31	13	0	41	0	18	0	1	42	38	0	0	0	56	0	0	0	0	1	0	8	0	0	0	16	0	0	0	2	0		0	6	0	9	0		7.74419	2.15796	0.977273
01:00:00	0	0	11	0	25	0	6	0	11	0	12	35	0	67	5	0	23	15	6	29	0	2	0	1	0	0	23	0	15	3	33	0	39	0	12	11	0	0		0	76	0	40	23		12.1628	2.74456	0.977273
01:30:00	5	0	43	18	11	0	4	2	0	11	16	54	0	69	35	0	36	22	0	18	0	3	0	0	0	14	31	8	5	12	44	0	0	0	5	0	1	15		0	27	53	44	14		14.4186	2.78805	0.977273
02:00:00	22	0	1	0	4	0	32	0	0	6	24	51	0	13	29	0	21	53	0	3	0	1	0	0	0	21	0	0	0	3	58	8	0	0	22	1	0	41		0	8	42	0	0		10.7907	2.56403	0.977273
02:30:00	15	0	0	4	43	0	17	0	12	20	0	48	0	1	0	44	18	15	0	49	0	7	0	0	0	0	0	0	0	50	30	73	0	3	19	11	1	39		0	1	13	26	0		13	2.83195	0.977273
03:00:00	33	0	18	7	12	0	0	5	53	0	25	33	0	50	1	0	18	55	0	2	0	1	0	0	0	0	12	0	0	13	51	70	0	0	8	14	0	50		0	61	15	7	11		14.5349	3.12305	0.977273
03:30:00	47	0	28	24	3	0	20	0	30	0	16	88	0	75	2	0	0	40	0	0	1	36	16	0	0	0	0	0	0	66	12	63	0	2	15	0	0	66		8	36	1	26	4		16.8605	3.68643	0.977273
04:00:00	31	0	19	7	0	0	12	45	29	25	20	24	11	24	15	0	0	38	0	22	31	17	48	0	0	0	0	0	0	15	25	0	21	5	7	0	0	59		0	20	0	19	62		15.1395	2.57567	0.977273
04:30:00	10	0	0	24	28	5	68	31	37	2	6	98	0	52	0	0	0	47	0	11	14	0	12	0	0	0	30	3	0	46	32	0	82	0	14	0	0	57		0	13	0	5	10		17.1395	3.74559	0.977273
05:00:00	50	0	13	0	18	75	0	2	14	0	0	58	0	54	0	0	0	15	0	0	0	2	0	65	0	0	0	40	0	0	48	0	66	0	11	0	0	58		23	16	0	14	18		15.3488	3.52744	0.977273
05:30:00	8	0	7	22	20	4	3	0	12	0	25	0	0	26	0	0	0	50	0	1	0	3	0	14	0	0	43	0	0	1	69	0	27	2	2	0	0	23		25	37	0	5	7		10.1395	2.43375	0.977273
06:00:00	0	1	22	51	4	0	32	9	0	0	2	54	0	0	0	0	0	42	42	27	0	5	0	30	0	0	40	0	0	0	66	0	0	22	31	0	0	17		32	15	42	53	4		14.9535	2.99704	0.977273
06:30:00	39	21	0	0	24	0	13	2	0	22	14	104	0	0	29	5	0	42	24	0	13	10	0	11	0	23	3	0	0	0	67	0	0	0	9	23	0	11		20	0	72	27	0		14.6047	3.38571	0.977273
07:00:00	47	13	28	0	15	0	23	0	0	3	51	108	0	0	0	0	0	66	5	39	0	16	5	2	0	43	1	0	0	32	1	47	26	10	7	23	20	5		5	0	66	23	0		16.9767	3.62691	0.977273
07:30:00	25	9	8	10	13	0	2	23	38	11	4	84	0	0	21	5	0	55	0	21	0	0	0	106	0	28	27	0	0	50	59	31	14	13	17	0	0	20		2	11	31	39	12		18.3488	3.58103	0.977273
08:00:00	61	13	25	13	35	59	43	17	31	14	0	84	2	0	11	0	0	60	0	15	0	15	0	0	12	0	18	3	23	39	67	31	26	0	21	0	10	25		13	0	33	36	5		20	3.25325	0.977273
08:30:00	23	18	14	13	23	17	32	6	23	20	8	75	0	19	0	3	0	60	0	30	31	3	23	12	0	9	30	0	19	21	74	21	27	0	23	0	23	19		27	10	30	37	2		19.186	2.71868	0.977273
09:00:00	35	64	70	36	35	64	48	19	48	12	55	60	32	45	61	35	68	56	52	35	68	39	49	52	32	48	20	61	41	61	50	51	30	11	29	45	64	79		41	32	45	46	40		45.6744	2.40287	0.977273
09:30:00	60	24	48	23	32	59	0	30	34	30	23	92	7	57	30	46	22	58	18	29	36	18	26	24	34	19	25	4	30	42	60	67	32	11	35	19	54	62		36	7	44	41	41		34.6279	2.89595	0.977273
10:00:00	45	14	0	8	33	33	29	7	8	25	16	105	60	39	17	19	9	42	26	23	24	25	28	0	45	13	3	0	22	15	59	53	33	58	17	30	39	53		22	18	33	57	34		28.814	3.14864	0.977273
10:30:00	49	9	17	13	14	25	16	2	10	12	27	100	25	26	28	0	23	35	27	20	18	11	28	42	13	22	21	20	6	13	8	34	15	61	22	15	32	14		15	0	22	35	26		22.5814	2.62373	0.977273
11:00:00	31	11	25	23	14	9	15	1	6	11	26	92	1	23	8	17	9	14	15	18	12	5	19	0	0	22	9	8	4	2	39	10	23	19	8	5	52	45		3	19	31	26	23		17.5116	2.53467	0.977273
11:30:00	29	7	6	27	8	18	7	6	4	0	8	55	10	39	46	10	25	9	0	5	13	4	12	0	10	19	0	17	43	4	28	28	24	39	13	51	35	43		18	13	11	11	11		17.814	2.28923	0.977273
12:00:00	24	10	0	17	2	2	11	3	6	2	3	63	17	18	7	0	2	4	18	3	0	0	8	0	0	4	2	0	0	2	23	4	14	25	20	2	30	27		3	17	14	17	17		10.2558	1.84868	0.977273
12:30:00	0	8	8	18	1	10	6	2	2	4	3	42	0	14	0	0	17	11	0	7	3	15	16	0	0	0	0	9	2	2	15	18	14	20	11	17	5	24		5	8	15	69	14		10.1163	1.91838	0.977273
13:00:00	0	0	6	25	2	7	0	5	3	0	9	44	37	17	33	8	5	12	2	16	22	3	4	0	0	2	0	2	0	0	18	19	6	8	15	4	63	25		23	25	16	0	8		11.4884	2.09687	0.977273
13:30:00	4	50	0	37	0	17	0	0	3	0	18	10	14	16	11	5	27	26	8	22	10	0	10	6	10	16	8	22	0	6	12	29	5	21	3	8	17	42		0	13	24	19	4		12.8605	1.81069	0.977273
14:00:00	0	3	3	0	0	11	0	1	2	0	0	17	0	0	0	0	9	3	0	6	0	2	0	0	0	4	3	5	0	20	23	21	3	27	9	13	18	9		4	0	14	0	6		5.48837	1.13554	0.977273
14:30:00	3	0	10	1	0	0	0	1	0	0	0	13	21	8	0	1	8	19	0	0	0	2	4	0	0	1	3	0	0	1	0	3	9	9	6	25	1	15		0	2	10	20	13		4.86047	1.04101	0.977273
15:00:00	0	3	0	0	0	6	6	0	0	0	2	16	1	1	19	5	0	27	0	0	0	0	4	0	0	0	0	0	0	3	2	3	14	24	7	7	9	26		0	23	0	7	4		5.09302	1.20023	0.977273
15:30:00	0	19	2	5	0	10	8	5	0	0	15	0	0	14	0	0	0	6	14	0	0	5	6	0	0	9	2	0	0	0	0	9	29	9	16	0	8	9		0	12	25	11	4		5.86047	1.1065	0.977273
16:00:00	0	0	0	5	0	2	0	11	0	12	2	2	0	0	6	0	0	0	0	0	0	2	0	0	0	1	0	0	0	0	18	0	6	17	23	37	0	34		0	12	35	0	0		5.23256	1.53181	0.977273
16:30:00	0	22	1	2	0	4	0	0	0	1	20	0	13	0	28	0	3	19	11	0	0	2	6	0	17	5	0	0	0	0	7	0	7	16	7	1	11	23		2	11	10	35	6		6.74419	1.34933	0.977273
17:00:00	0	36	7	7	0	9	0	2	0	16	8	18	14	2	8	0	7	12	3	3	0	7	0	0	0	20	0	16	0	0	51	10	39	14	4	43	0	26		18	6	12	5	11		10.093	1.90174	0.977273
17:30:00	0	5	14	9	0	2	0	0	0	2	0	0	0	0	12	0	0	6	0	0	0	13	0	0	0	0	0	14	2	0	16	0	5	6	6	0	38	15		2	3	0	37	2		4.86047	1.34172	0.977273
18:00:00	0	1	2	0	0	2	0	1	0	0	7	6	0	0	0	0	0	4	0	0	0	2	17	0	0	25	0	19	0	0	5	0	7	3	11	0	39	8		56	1	0	16	0		5.39535	1.71636	0.977273
18:30:00	0	3	0	23	2	19	0	0	0	2	0	12	2	0	2	0	5	8	4	0	0	8	14	3	0	3	0	36	16	0	4	4	22	2	8	0	9	31		14	35	17	0	2		7.2093	1.50656	0.977273
19:00:00	2	35	6	33	2	23	0	0	0	4	15	19	0	85	29	0	0	4	0	0	6	10	20	0	0	34	3	13	18	12	4	17	13	0	12	0	34	8		19	2	59	23	5		13.2326	2.6432	0.977273
19:30:00	3	29	26	22	17	20	9	6	3	16	26	21	16	30	14	4	0	14	18	8	17	2	26	8	1	25	0	19	32	0	6	4	31	0	20	3	39	37		26	19	37	7	2		15.4186	1.78316	0.977273
20:00:00	31	36	26	28	39	30	31	6	20	15	20	40	12	44	39	32	6	33	16	2	30	4	37	40	28	32	29	39	26	5	39	34	32	0	20	1	43	32		24	17	46	42	7		25.8837	2.036	0.977273
20:30:00	63	43	28	31	31	38	40	10	16	16	24	47	22	37	24	36	21	40	32	6	47	27	33	47	29	33	27	44	36	36	43	47	38	0	40	14	44	40		37	28	43	5	26		31.8372	1.99194	0.977273
21:00:00	110	104	69	52	89	128	88	54	75	77	40	113	73	102	88	104	59	101	79	75	123	36	113	62	66	100	55	57	77	94	149	109	74	2	55	73	64	54		84	46	104	104	83		80.5581	4.28178	0.977273
21:30:00	105	13	25	20	40	132	34	20	43	44	86	132	12	107	2	10	31	105	10	69	34	57	77	0	3	8	97	2	33	64	144	23	11	0	48	13	12	59		9	20	79	29	15		43.6512	6.14929	0.977273
22:00:00	60	3	7	27	8	113	1	5	46	12	2	105	4	62	45	0	0	79	0	60	3	14	42	0	0	0	8	0	26	31	113	10	15	0	27	0	24	31		0	10	57	32	0		25.1628	4.8475	0.977273
22:30:00	8	1	0	9	0	0	0	4	17	2	0	14	0	70	9	0	0	77	0	13	12	0	66	0	0	0	0	0	0	0	34	62	6	2	2	0	0	23		0	0	3	5	2		10.2558	3.09665	0.977273
23:00:00	0	8	33	33	3	0	0	63	60	0	15	43	14	126	1	0	0	53	0	83	1	0	50	0	0	0	0	0	2	0	1	0	0	2	8	0	0	13		0	0	0	25	1		14.8372	4.18084	0.977273
23:30:00	0	0	3	0	0	0	0	2	2	4	31	59	1	0	0	0	0	14	0	0	3	2	0	0	0	0	13	7	1	0	0	12	11	2	7	0	0	44		0	0	0	19	0		5.51163	1.85474	0.977273
00:00:00	61	0	9	0	0	0	0	0	0	0	0	15	0	0	3	36	0	23	0	10	1	5	0	0	0	0	82	0	0	0	55	57	2	3	4	0	0	30		0	0	0	8	14		9.72093	2.98674	0.977273
00:30:00	47	0	1	0	0	0	6	2	0	2	15	71	0	86	5	0	0	4	0	14	10	48	0	0	0	0	42	0	0	0	66	35	24	2	7	4	3	59		0	0	0	41	22		14.3256	3.52003	0.977273
01:00:00	30	0	20	31	25	0	15	0	0	32	0	23	2	69	0	0	0	25	0	60	3	19	0	0	0	0	19	0	3	6	36	2	16	2	41	34	5	48		0	3	0	1	29		13.9302	2.75049	0.977273
01:30:00	3	0	0	26	0	0	17	0	6	3	4	50	6	38	22	0	0	26	0	3	0	0	0	0	0	0	16	19	4	6	31	1	18	0	19	12	13	47		0	22	0	59	0		10.9535	2.33277	0.977273
02:00:00	34	1	4	0	45	0	14	0	41	15	30	3	0	0	56	0	0	63	0	0	1	4	0	0	0	0	24	10	1	96	86	0	15	2	13	0	3	14		0	22	0	49	0		15.0233	3.67589	0.977273
02:30:00	52	0	0	18	16	0	34	0	33	23	10	69	0	0	30	0	24	51	0	1	1	4	0	0	0	0	2	0	0	26	49	43	77		5	0	23	19		0	40	0	9	33		16.4762	3.24713	0.954545
03:00:00	64	36	0	12	41	0	1	0	19	5	14	44	0	0	0	5	0	47	0	16	61	13	0	0	0	0	9	0	0	5	74	79	25		47	24	19	1		0	9	0	20	10		16.6667	3.46086	0.954545
03:30:00	2	23	12	8	4	0	45	6	19	0	47	0	0	28	0	13	0	36	0	29	0	4	0	0	0	0	0	1	0	6	32	26	86		17	16	0	29		0	14	0	15	0		12.3333	2.7524	0.954545
04:00:00	47	0	20	15	12	0	16	0	0	0	4	35	0	104	4	0	0	25	0	54	0	4	0	0	0	0	18	7	0	22	19	46	0		11	8	0	75		0	12	0	8	0		13.4762	3.45777	0.954545
04:30:00	44	0	3	7	23	0	3	8	36	0	12	94	4	41	51	0	0	36	0	0	0	6	3	0	0	0	2	0	0	13	1	3	0		33	0	0	19		8	22	4	48	0		12.4762	3.09307	0.954545
05:00:00	35	0	4	20	33	0	13	0	24	0	4	93	0	53	36	0	0	31	0	0	0	5	1	0	0	0	9	25	0	23	59	0	0		16	0	0	0		29	0	19	154	0		16.3333	4.56705	0.954545
05:30:00	34	11	11	0	25	24	25	0	1	0	37	4	0	35	0	0	0	39	0	0	0	9	0	0	0	0	18	31	0	0	62	0	0		41	0	0	0		22	13	18	84	33		13.7381	2.99459	0.954545
06:00:00	43	38	26	0	41	92	37	0	4	0	18	46	0	0	22	0	0	20	0	0	21	5	0	0	0	0	29	0	0	11	86	0	57		21	0	0	12		18	8	53	7	0		17.0238	3.61913	0.954545
06:30:00	6	25	0	47	21	42	18	0	43	0	39	0	0	0	14	0	0	28	0	10	0	0	0	0	0	0	80	0	0	14	82	0	52		39	0	0	5		5	16	62	24	36		16.8571	3.53193	0.954545
07:00:00	23	0	35	6	1	15	0	28	29	15	83	113	10	54	60	0	36	39	0	42	40	5	0	8	0	0	14	0	0	17	61	0	31		8	16	0	9		9	17	14	42	0		20.9524	3.87597	0.954545
07:30:00	51	17	11	23	30	36	47	20	0	0	1	92	0	62	0	0	0	40	34	6	1	2	0	15	0	0	16	10	0	22	68	0	2		22	33	90	8		20	17	80	20	8		21.5238	3.958	0.954545
08:00:00	34	33	14	0	25	0	0	0	11	36	31	69	0	2	21	0	0	1	0	9	0	4	0	31	0	46	35	11	0	46	38	0	4		16	5	0	3		2	17	7	14	0		13.4524	2.637	0.954545
[truncated: 47 more columns]

## Sheet: Fig 4 S2 A (ND Kir2.1)
FED (Kir2.1~BD-AD-AKHR)	FED1															FED2																FED3														FED4
20:30:00	42	30	29	23	1	2	22	8	37	40	30	18	0	0	68	19	15	26	48	40	59	1	42	2	30	1	0	8	35	27	8	61	22	0	29	55	15	22	30	38	31	17	16	33	34	69	47	0	53
21:00:00	51	48	31	22	46	59	38	42	53	31	41	23	3	25	43	137	63	39	55	51	62	6	15	10	38	60	0	22	49	43	49	44	7	12	19	49	3	29	33	41	28	55	38	46	49	46	59	4	13
21:30:00	46	19	55	56	52	65	67	102	41	57	78	56	39	60	72	61	78	85	66	62	75	56	8	62	54	62	78	33	46	68	69	71	56	65	66	96	45	29	32	60	68	75	83	83	71	28	79	46	43
22:00:00	5	5	41	50	42	57	58	101	30	1	64	22	31	48	55	75	60	74	52	11	35	43	5	67	8	5	82	4	15	3	22	73	18	63	58	23	45	34	0	68	66	65	0	28	47	0	73	44	0
22:30:00	7	0	17	44	26	38	16	15	18	1	10	13	34	15	0	2	14	44	36	0	10	2	27	24	0	4	0	0	6	0	0	27	0	17	48	17	23	4	10	0	14	44	0	0	25	0	24	0	0
23:00:00	3	1	0	18	0	5	11	0	1	0	0	0	14	7	0	0	0	0	6	0	3	0	41	0	0	7	0	0	3	0	0	0	0	0	30	4	0	2	3	0	0	0	0	0	0	0	5	0	0
23:30:00	8	9	0	0	0	0	0	0	3	0	0	0	5	0	0	0	0	0	0	0	1	0	34	2	0	8	0	0	3	0	0	0	0	0	29	0	0	6	15	0	0	0	0	0	0	0	0	0	1
00:00:00	14	25	0	0	0	0	5	0	2	0	0	0	0	0	39	0	0	0	0	0	0	0	15	4	0	7	0	0	1	0	0	0	5	0	12	7	0	2	5	0	0	0	0	0	0	12	0	0	0
00:30:00	15	7	0	0	0	0	13	0	11	0	0	0	0	1	5	0	0	0	0	0	4	0	4	0	0	7	0	0	1	0	0	0	5	0	9	0	0	5	8	0	0	0	0	0	0	0	0	0	0
01:00:00	0	5	0	0	0	0	10	0	0	0	0	0	0	0	14	0	0	0	2	0	2	0	2	10	0	4	0	0	7	0	0	0	18	0	6	0	0	2	2	0	0	0	0	0	0	0	0	0	0
01:30:00	0	0	0	0	0	0	0	0	0	0	0	0	0	0	0	0	0	0	0	0	3	7	7	9	0	0	0	3	25	0	0	0	15	0	5	27	0	0	4	0	0	0	8	0	0	8	0	0	4
02:00:00	12	0	0	0	0	14	2	0	1	0	16	0	0	0	0	0	0	0	0	0	1	3	25	0	0	0	0	0	1	0	0	0	3	0	5	0	0	5	0	0	0	0	16	0	0	40	0	0	4
02:30:00	15	0	0	0	0	0	0	0	0	0	1	0	0	0	0	0	0	9	0	0	1	6	21	0	0	0	0	0	6	0	0	1	0	0	9	1	0	7	4	0	0	0	41	0	0	33	0	0	0
03:00:00	0	0	0	0	0	0	3	0	0	0	14	0	0	0	0	0	0	1	0	0	0	0	32	0	0	0	5	0	2	0	0	1	0	0	10	3	0	11	0	0	0	0	0	0	0	7	0	0	0
03:30:00	3	0	0	0	0	7	9	0	2	0	0	0	0	0	0	0	0	5	0	0	5	0	0	0	0	0	0	0	0	0	0	2	0	0	1	2	0	7	3	0	0	0	0	0	0	0	0	0	0
04:00:00	15	0	0	0	0	8	2	0	1	0	9	0	0	0	0	0	0	36	0	0	3	0	15	0	0	9	0	0	10	0	0	5	0	0	0	2	0	3	2	0	0	0	0	0	0	0	0	0	0
04:30:00	4	0	0	0	0	0	0	0	0	0	0	0	0	0	0	0	0	1	0	0	7	0	7	0	0	0	0	0	25	0	0	1	0	0	1	0	0	0	2	0	0	0	0	0	0	0	0	0	0
05:00:00	2	0	0	0	0	5	0	0	2	0	0	0	0	0	0	0	1	8	0	0	1	0		0	0	13	0	0	14	0	0	2	0	1	2	0	0	0	0	0	0	0	0	0	0	0	0	0	0
05:30:00	0	0	0	0	0	0	0	0	9	0	8	0	0	0	0	0	0	0	0	0	1	0		0	0	1	0	0	0	0	0	0	0	25	0	0	0	9	0	0	0	0	0	0	1	0	0	0	0
06:00:00	16	0	0	0	0	5	0	0	8	0	9	0	0	0	0	0	1	1	7	0	0	0		0	0	7	0	10	7	0	0	0	0	38	1	0	0	2	0	0	0	0	0	0	13	4	0	0	0
06:30:00	8	0	0	0	0	0	1	0	0	0	1	3	0	0	0	0	0	3	2	0	7	0		0	3	0	0	0	7	0	0	0	0	0	0	0	0	10	0	0	0	0	0	0	18	0	0	0	3
07:00:00	12	0	0	0	0	0	4	0	11	0	0	0	0	0	4	0	3	0	0	0	1	0		0	0	0	0	0	13	16	0	0	0	0	0	24	0	1	0	0	0	0	0	0	13	0	0	0	0
07:30:00	13	0	0	0	0	0	3	0	5	0	0	0	0	0	1	0	3	4	0	0	1	0		0	0	0	0	0	0	13	0	0	0	0	0	6	0	11	0	0	0	0	0	0	0	1	0	0	0
08:00:00	0	0	0	0	0	0	5	0	0	0	0	3	0	0	1	0	7	1	0	0	20	0		0	0	0	0	0	0	0	0	0	0	0	1	0	0	0	0	0	0	0	0	0	0	4	0	0	0
08:30:00	25	0	0	0	0	0	22	0	0	0	0	0	0	0	8	0	25	12	0	0	7	0		0	0	0	0	0	0	0	0	0	0	26	0	0	0	14	0	0	0	0	0	0	0	0	0	0	0
09:00:00	38	0	0	0	0	0	20	0	0	8	0	6	0	0	7	0	4	34	0	0	11	0		0	0	1	0	0	25	0	0	0	0	0	0	14	0	0	14	0	0	0	6	0	0	0	13	0	0
09:30:00	44	43	60	52	66	53	73	78	27	49	63	47	37	46	58	50	74	55	59	83	70	41		59	51	73	58	47	58	55	54	60	50	117	51	87	56	48	59	56	55	56	73	57	58	60	60	77	52
10:00:00	47	47	61	61	70	44	83	90	26	39	58	38	51	54	61	70	92	59	58	93	52	43		69	47	51	48	53	39	35	51	60	48	58	33	76	40	40	64	96	48	60	70	68	49	5	56	45	56
10:30:00	42	68	46	61	74	39	67	97	29	46	60	35	51	39	56	70	84	64	83	82	78	40		64	46	64	52	44	53	49	105	64	44	60	42	79	54	28	57	89	63	59	67	51	43	0	53	55	51
11:00:00	33	58	70	55	42	46	46	101	25	44	58	27	58	48	38	74	48	33	66	109	65	59		56	50	56	95	41	47	33	57	70	51	50	47	76	135	36	55	107	56	54	53	54	47	46	55	61	48
11:30:00	49	59	60	57	38	29	14	82	42	33	64	25	43	15	45	124	58	1	78	47	83	50		86	59	47	84	37	57	15	101	86	85	47	27	70	29	34	63	80	77	69	80	43	52	45	62	54	44
12:00:00	41	7	42	47	38	45	47	78	22	48	63	27	38	3	19	98	28	2	84	34	46	42		64	76	38	43	0	49	7	35	97	79	59	28	43	50	35	50	53	55	54	52	31	39	1	59	0	32
12:30:00	44	17	45	55	36	34	38	75	38	40	8	26	40	17	3	50	43	11	66	22	101	43		65	60	17	41	0	50	2	19	48	38	39	20	40	10	42	57	35	51	46	24	25	29	0	58	0	62
13:00:00	43	27	40	24	2	25	41	64	18	25	5	16	4	8	5	45	26	6	72	26	40	3		0	52	37	19	1	35	0	9	77	17	16	16	28	9	39	39	36	59	35	12	8	5	35	53	25	33
13:30:00	30	65	17	41	0	3	41	53	19	17	46	9	7	3	30	29	2	59	54	3	68	5		37	60	4	0	34	29	0	10	48	44	5	12	46	49	36	32	25	77	35	201	3	11	22	45	0	0
14:00:00	55	40	13	10	7	0	4	0	18	10	69	13	7	0	40	8	0	1	71	4	16	7		2	48	1	0	17	45	27	0	23	42	12	20	12	6	27	34	0	14	85	29	7	18	0	35	0	0
14:30:00	21	0	6	21	21	0	49	0	24	28	34	0	14	25	10	19	0	16	28	2	41	0		21	0	10	0	5	24	17	4	9	2	5	21	67	8	14	17	5	1	35	12	3	1	0	32	0	0
15:00:00	40	2	0	1	23	0	12	6	23	14	16	3	8	11	0	40	3	34	6	3	6	0		3	28	8	0	26	8	4	21	34	7	4	25	14	36	27	10	0	0	7	9	0	3	16	47	0	0
15:30:00	24	0	9	7	5	0	11	1	36	30	60	0	4	16	4	64	8	40	74	2	50	0		51	34	5	0	22	45	1	3	8	21	9	25	22	16	21	41	0	0	6	40	2	8	0	45	0	11
16:00:00	23	23	0	0	11	0	16	0	20	17	41	0	13	66	0	13	4	38	44	0	11	8		13	27	5	4	28	15	16	29	4	21	0	2	30	20	27	31	0	4	0	19	0	6	32	45	0	0
16:30:00	85	7	20	4	24	0	38	0	7	7	53	31	27	18	0	0	0	35	18	0	34	0		29	150	18	3	34	17	12	0	10	13	10	57	33	47	13	44	0	6	0	0	0	0	48	38	0	9
17:00:00	45	2	7	0	4	0	5	17	28	4	58	10	0	3	0	27	0	22	24	28	23	0		49	10	3	0	32	37	5	0	4	9	0	14	27	12	28	20	0	34	0	0	16	14	41	28	0	28
17:30:00	30	10	17	18	5	0	20	5	24	30	25	12	0	2	2	10	13	51	50	25	53	0		23	62	1	0	33	28	17	1	5	0	0	20	32	19	19	58	61	21	0	3	7	0	23	41	0	31
18:00:00	47	20	4	4	21	0	43	11	41	23	14	16	0	22	0	42	8	36	1	9	11	0		0	32	10	3	24	32	5	23	10	1	33	29	25	16	14	33	10	56	0	0	22	8	0	39	0	22
18:30:00	42	37	41	12	108	0	35	18	22	31	46	18	0	29	13	2	0	33	39	50	45	0		0	48	44	0	38	22	18	5	11	62	5	29	40	31	36	42	21	87	0	153	50	1	0	42	0	6
19:00:00	35	26	14	0	16	2	40	14	37	28	18	13	0	7	29	25	0	28	51	3	54	9		4	99	3	43	13	30	3	20	34	0	7	19	37	0	26	33	35	46	6	48	28	11	13	51	36	26
19:30:00	49	40	34	46	11	25	43	48	31	37	26	19	0	17	30	25	6	42	46	45	58	19		0	65	46	0	0	36	24	47	48	16	18	40	35	2	29	64	80	50	103	20	30	13	8	46	29	30
20:00:00	46	54	47	8	25	23	36	68	38	37	63	0	3	15	50	44	30	50	58	49	59	37		52	89	27	32	1	30	34	43	53	26	39	28	42	9	31	60	63	108	11	33	48	33	29	53	44	41
20:30:00	49	78	56	28	20	34	42	74	35	26	61	24	48	40	36	46	93	54	68	59	70	39		43	45	35	37	23	31	34	42	50	19	28	27	48	15	35	50	45	66	44	43	52	44	38	50	13	45
21:00:00	50	64	45	42	35	44	62	63	31	27	69	33	53	43	43	44	50	0	66	57	63	33		58	57	52	55	24	43	52	38	39	105	41	30	49	28	23	94	36	76	47	44	60	45	29	56	44	34
21:30:00	28	27	83	62	71	80	40	133	34	31	93	31	59	76	72	107	67	75	51	54	65	64		80	34	64	66	46	30	93	55	96	17	74	52	65	52	5	31	65	98	74	76	70	59	22	55	50	10
22:00:00	5	1	9	56	6	11	12	42	13	22	61	9	6	21	31	14	21	47	0	0	0	0		10	0	0	0	50	35	0	0	2	0	3	20	19	49	23	0	0	0	56	2	0	87	0	10	6	7
22:30:00	11	0	0	30	0	0	14	0	5	0	28	3	0	7	0	0	0	0	0	0	0	0		0	7	0	0	0	13	0	1	0	0	0	13	14	6	14	22	0	0	1	0	0	0	0	5	2	4
23:00:00	8	0	0	0	0	0	15	0	4	23	13	0	0	0	0	0	0	0	0	0	0	0		0	0	0	0	7	4	0	1	0	0	0	22	11	3	13	19	0	0	0	0	0	0	0	3	1	0
23:30:00	6	0	0	0	0	0	4	0	15	4	48	1	0	0	0	0	0	0	0	0	0	0		0	0	28	0	0	7	0	0	0	0	0	10	12	1	34	8	0	0	0	0	0	0	2	2	5	0
00:00:00	18	0	0	0	0	0	9	0	18	1	21	3	0	0	0	0	0	0	0	0	0	0		0	67	0	0	0	28	0	10	0	0	0	19	6	3	13	36	0	0	0	0	0	0	2	19	0	0
00:30:00	7	0	0	0	0	0	6	0	5	0	30	5	0	0	0	0	0	0	0	0	0	0		0	0	3	0	56	6	0	19	0	0	0	5	9	4	8	22	0	0	0	0	0	0	1	5	3	1
01:00:00	4	0	0	0	0	0	8	0	18	0	4	2	0	0	1	0	0	0	0	0	0	0		0	3	9	0	18	11	0	21	0	0	0	0	12	2	7	17	0	0	0	0	0	0	0	9	6	0
01:30:00	10	7	0	0	0	0	2	0	8	13	4	4	0	0	1	0	0	0	0	0	0	0		0	16	2	0	6	12	0	1	0	0	0	4	10	3	0	2	0	0	0	0	0	0	6	7	4	3
02:00:00	1	0	0	0	0	0	10	0	4	0	6	0	0	0	0	0	0	0	0	0	8	0		0	3	1	0	0	5	0	1	0	5	0	0	1	0	7	12	0	0	0	0	0	0	0	15	5	0
02:30:00	8	0	0	0	0	0	3	0	7	2	21	1	0	1	0	0	0	0	0	0	0	0		0	3	6	0	0	12	0	19	0	32	0	0	29	0	6	22	0	0	0	0	0	0	0	8	1	12
03:00:00	12	1	0	0	0	6	8	0	15	3	19	0	0	2	2	0	0	0	0	0	5	0		0	0	9	0	0	20	0	11	0	22	0	0	3	0	4	7	0	0	0	0	0	0	3	8	0	3
03:30:00	10	1	0	0	0	5	12	0	5	3	8	0	0	0	4	0	0	0	0	0	5	0		0	9	0	0	0	0	0	4	0	13	0	1	1	0	12	10	0	0	0	0	0	0	9	5	8	2
04:00:00	10	0	0	0	0	0	1	0	22	0	54	10	0	0	0	0	0	0	0	0	2	0		0	15	11	0	0	6	0	16	0	22	0	8	6	0	11	0	0	0	0	0	0	0	0	5	0	1
04:30:00	4	0	0	12	0	5	71	0	38	6	39	5	0	0	2	0	0	0	0	0	2	0		0	3	3	0	0	1	0	9	0	16	0	7	0	0	34	2	0	0	0	0	0	0	0	6	0	6
05:00:00	5	0	0	3	0	1	53	0	59	3	9	5	0	0	0	0	0	0	0	0	8	0		0	2	4	0	0	2	0	4	0	17	2	0	6	0	7	9	0	0	0	0	0	0	4	4	0	8
05:30:00	3	0	0	0	0	2	9	0	17	1	4	7	2	0	0	0	0	0	0	0	22	0		0	6	6	0	0	3	0	0	0	0	7	1	0	0	8	0	0	0	0	0	0	0	2	0	3	0
06:00:00	5	2	0	0	0	6	21	0	12	1	3	1	8	0	0	0	0	0	0	0	6	0		0	13	1	0	0	0	0	6	0	0	3	0	10	0	17	0	0	0	0	5	0	0	0	13	0	4
06:30:00	13	1	0	1	0	10	30	0	0	6	3	2	0	0	0	0	0	2	0	0	21	0		0	0	10	0	0	0	0	7	0	0	1	0	10	0	19	0	0	1	0	0	0	0	5	0	0	7
07:00:00	11	0	0	6	0	0	5	0	0	5	9	0	5	0	0	0	0	6	0	0	5	0		0	1	0	0	0	0	0	66	0	0	0	2	0	0	15	0	0	0	0	0	0	0	0	0	0	10
07:30:00	4	0	0	0	0	10	1	0	0	0	10	4	0	12	1	0	0	0	0	0	8	0		0	23	0	0	0	6	0	3	0	0	0	0	0	0	9	16	0	0	0	1	0	0	0	12	0	4
08:00:00	16	1	0	6	0	3	3	0	0	0	0	0	0	0	3	0	0	0	0	0	15	0		0	0	34	0	0	0	0	25	0	0	4	0	0	0	0	0	0	0	0	23	0	17	0	0	0	5
08:30:00	12	0	0	1	0	10	0	0	0	8	6	0	13	0	6	0	0	9	0	2	17	9		0	0	6	0	0	0	0	1	0	0	9	0	0	2	0	17	0	0	0	0	0	8	5	11	0	0
09:00:00	26	5	0	9	2	0	52	16	0	18	36	6	0	61	0	0	2	36	0	0	22	2		5	28	6	0	3	0	6	22	4	0	3	0	14	0	0	27	1	0	0	9	0	13	0	29	0	2
09:30:00	38	56	66	57	59	62	82	80	30	44	72	39	47	67	57	40	69	51	51	63	59	57		66	51	55	57	36	33	71	51	49	46	58	34	65	52	35	33	60	59	61	85	69	64	18	52	56	47
10:00:00	32	48	52	63	60	53	80	94	29	32	81	29	40	51	57	64	48	61	53	73	62	55		71	59	55	68	19	27	52	41	63	60	54	30	68	44	40	41	59	107	52	71	62	62	34	62	20	46
10:30:00	42	59	47	60	46	48	79	79	30	32	73	33	51	44	49	50	45	38	63	63	50	63		83	54	49	48	25	28	36	53	66	58	52	30	63	29	50	44	59	70	49	68	24	63	38	62	48	37
11:00:00	37	56	56	62	22	20	64	58	27	30	71	17	44	40	45	44	26	52	55	56	63	53		71	65	47	15	17	20	49	38	82	41	40	26	67	48	43	46	53	79	56	62	29	55	26	60	11	47
11:30:00	30	59	41	54	6	47	57	52	29	30	69	36	46	77	121	81	29	47	55	71	55	38		42	60	55	44	26	30	4	17	72	44	28	18	74	28	58	30	51	49	48	60	12	56	20	58	27	17
12:00:00	36	57	33	59	20	34	45	31	34	37	71	17	29	24	37	37	18	50	70	31	56	21		24	71	43	24	29	25	0	27	63	14	26	17	57	12	41	42	33	50	43	57	2	36	20	54	6	15
12:30:00	42	58	16	33	35	17	54	45	14	40	56	18	17	28	8	50	34	47	40	38	49	25		43	54	36	29	18	11	2	28	60	17	18	16	66	5	41	36	50	31	35	46	68	18	12	51	27	36
13:00:00	39	54	11	39	124	11	33	20	35	14	65	39	4	12	17	24	32	71	18	3	50	16		10	48	9	20	9	0	5	28	77	18	2	2	53	2	38	33	32	34	30	45	33	16	8	41	21	21
13:30:00	35	40	28	0	41	28	2	13	31	15	55	9	0	7	0	3	0	17	5	29	39	36		26	39	11	21	23	2	41	17	79	2	1	0	84	0	43	23	11	20	26	32	34	34	0	30	0	0
14:00:00	25	46	7	30	6	17	18	41	31	13	53	0	0	24	15	20	0	30	39	57	45	7		22	51	8	23	16	2	4	61	24	18	42	1	48	21	16	0	22	75	4	30	54	41	0	22	0	17
14:30:00	21	16	38	59	16	0	9	0	22	3	48	3	4	71	10	29	0	47	62	37	50	1		32	50	18	0	14	30	0	74	0	57	1	3	60	0	6	8	8	13	6	20	0	68	0	40	5	30
15:00:00	27	5	23	0	12	15	27	11	26	10	34	0	0	1	0	18	9	47	17	0	33	5		25	67	0	0	11	26	0	11	30	45	37	0	43	0	30	6	1	6	4	13	8	0	0	26	0	37
15:30:00	29	0	50	0	0	31	7	19	21	40	37	0	5	9	3	31	7	6	44	17	28	22		7	54	0	0	22	23	0	0	32	36	20	3	46	0	0	14	8	31	0	8	1	5	0	26	3	36
16:00:00	31	30	2	5	0	0	6	31	29	6	29	17	2	35	3	27	0	1	4	4	9	0		0	19	0	0	23	28	0	43	7	29	37	3	29	3	27	19	2	2	1	0	1	8	0	23	1	40
16:30:00	32	49	28	20	14	3	8	29	21	6	35	12	3	6	0	0	16	0	88	107	35	0		5	51	0	0	27	20	0	62	17	14	5	1	25	5	31	20	4	5	0	1	16	9	0	24	24	36
17:00:00	21	7	0	57	19	0	22	9	29	18	31	12	22	41	0	5	24	7	31	23	28	0		27	55	0	0	22	20	1	33	12	61	2	0	47	2	50	43	0	5	0	0	3	9	0	33	1	19
17:30:00	27	20	38	34	26	23	31	63	29	19	42	14	9	36	40	0	0	34	51	5	53	21		18	52	23	22	24	14	29	139	17	43	22	0	34	9	33	36	1	26	72	45	42	46	0	32	40	0
18:00:00	42	33	45	1	27	0	39	25	35	22	49	5	109	15	14	0	7	45	52	0	56	27		0	66	6	46	36	15	1	40	27	0	0	13	52	16	25	29	0	49	0	1	0	3	0	50	2	1
18:30:00	42	40	36	0	13	0	26	27	27	6	45	20	1	48	22	3	23	39	47	15	56	26		0	57	48	11	33	0	0	30	15	1	1	18	46	8	34	24	42	61	20	97	3	11	0	40	3	23
19:00:00	39	52	21	2	19	0	24	22	29	22	36	20	3	23	10	19	32	56	63	85	55	62		27	54	54	1	18	4	2	14	24	49	7	25	38	2	27	31	40	40	27	92	2	80	0	42	6	28
19:30:00	45	49	30	6	20	18	22	26	23	25	50	13	0	29	13	19	23	45	66	15	53	30		27	63	16	1	23	21	10	44	34	44	23	15	37	0	0	38	9	32	16	68	22	8	0	53	11	26
20:00:00	34	57	41	13	61	21	29	58	39	32	54	14	64	33	45	57	37	40	69	95	65	42		46	53	30	98	23	16	49	58	90	52	11	20	51	31	23	34	114	98	40	38	41	46	0	57	26	15
20:30:00	28	48	56	59	28	42	53	77	30	34	61	25	40	40	55	63	42	61	75	61	56	48		59	66	45	55	19	17	53	62	69	36	32	22	55	48	49	38	53	94	54	55	56	50	0	55	39	0
21:00:00	68	41	89	61	83	78	36	119	27	50	100	20	61	95	80	100	87	84	94	67	53	88		83	91	82	96	25	11	82	77	111	39	73	60	89	61	67	26	78	123	95	92	81	78	0	61	53	2
21:30:00	16	64	26	55	64	30	17	26	21	4	46	17	40	59	15	11	6	18	19	0	17	18		38	46	0	38	27	12	9	9	83	0	1	57	64	17	41	8	6	18	62	52	0	14	0	19	33	0
22:00:00	30	24	0	87	0	0	40	0	22	0	47	19	0	32	0	0	0	0	0	0	79	0		0	41	0	0	18	7	0	0	12	0	0	21	42	0	40	19	0	0	20	30	0	0	0	77	26	0
22:30:00	24	40	0	16	0	0	45	0	24	0	22	0	0	16	0	0	0	0	0	0	33	0		0	14	0	0	3	8	3	0	0	0	0	0	48	0	26	9	0	0	0	39	0	0	0	30	0	0
23:00:00	14	19	0	0	0	0	24	0	19	0	23	6	0	1	0	0	0	0	0	0	12	0		0	14	0	0	1	0	0	0	0	0	0	0	21	0	41	2	0	0	0	3	0	0	0	21	0	0
23:30:00	16	8	0	0	0	0	19	0	2	0	21	2	0	4	0	0	0	0	0	0	9	0		0	76	0	0	5	0	7	0	10	0	0	0	14	0	39	45	0	0	0	16	0	0	0	27	0	0
00:00:00	21	11	0	0	3	0	42	0	2	0	6	6	0	8	0	0	0	0	0	0	3	0		0	8	0	0	11	0	2	0	0	0	0	0	29	0	19	12	0	0	0	0	0	0	0	32	0	3
00:30:00	14	4	0	0	9	8	8	0	10	0	13	3	0	6	17	0	0	0	0	0	24	0		0	23	0	0	6	0	10	0	0	0	0	2	8	0	25	0	0	0	0	14	0	0	0	48	0	19
01:00:00	25	0	0	0	2	3	3	0	9	10	17	9	0	8	0	0	0	0	0	0	24	0		0	16	0	0	5	4	0	0	0	0	0	4	35	0	14	13	6	0	0	0	0	0	0	15	0	8
01:30:00	26	14	0	0	0	20	11	0	7	0	58	9	0	9	0	0	0	4	0	0	52	0		0	17	0	0	1	6	0	0	0	0	0	0	30	0	19	0	0	0	0	0	0	0	0	7	0	2
02:00:00	22	2	0	0	0	7	14	0	3	4	53	5	0	16	4	0	0	2	0	0	39	0		0	11	0	0	11	4	0	0	0	0	0	6	23	0	19	20	2	0	0	0	0	0	0	11	0	4
02:30:00	25	12	0	0	0	23	17	0	11	12	12	4	0	5	15	0	0	1	0	0	13	0		0	16	0	0	0	19	0	0	0	0	0	1	2	0	37	11	0	0	0	0	0	0	0	9	0	0
03:00:00	3	11	0	0	13	11	15	0	22	12	12	0	0	5	0	0	0	2	0	0	8	0		0	8	0	0	1		0	0	0	0	0	0	4	0	17	0	0	0	0	5	2	0	0	3	0	8
03:30:00	12	0	0	0	0	0	12	0	14	0	5	6	0	18	0	3	0	4	0	0	31	0		3	10	0	0	3		0	0	0	0	0	0	2	0	18	0	0	0	0	14	1	0	0	20	0	0
04:00:00	15	2	0	0	4	3	2	0	5	0	5	8	0	48	1	14	0	4	0	0	13	0		0	0	0	0	0		0	0	0	0	0	0	10	0	11	6	0	0	0	24	5	0	0	0	0	0
04:30:00	4	0	0	0	1	0	2	0	17	0	4	2	0	1	6	2	0	1	0	0	8	0		5	32	0	0	28		0	0	0	0	0	0	1	0	3	3	3	0	0	74	1	0	0	1	0	27
05:00:00	14	0	0	0	2	9	7	0	25	0	2	3	0	10	0	8	0	10	0	0	22	0		6	32	0	0	0		0	0	0	0	0	0	6	0	13	0	2	0	0	4	3	0	0	2	0	9
05:30:00	4	3	0	0	3	0	3	0	13	0	17	0	0	1	0	7	0	0	0	0	0	1		8	12	0	0	0		0	0	0	0	0	1	0	0	7	0	16	0	0	4	3	0	0	11	0	1
06:00:00	20	0	0	0	1	8	6	0	14	0	1	1	0	31	0	8	0	11	0	0	0	0		20	0	0	0	3		0	0	0	0	0	7	6	0	10	3	5	0	0	0	4	0	0	16	0	2
06:30:00	7	5	0	0	14	11	13	0	8	8	24	2	0	9	0	23	0	25	0	0	0	0		0	3	0	0	0		0	8	14	0	0	0	0	0	0	5	17	0	0	6	1	0	0	16	0	4
07:00:00	2	2	0	1	0	4	2	0	5	0	5	5	0	10	8	30	0	17	0	0	12	0		0	9	0	0	0		0	7	0	0	0	0	15	0	0	9	21	0	0	25	8	0	0	7	0	3
07:30:00	15	1	19	1	0	12	0	0	0	3	12	14	0	14	21	11	0	38	0	0	8	0		0	15	0	0	0		0	5	0	0	0	0	1	0	17	10	42	0	0	7	38	0	0	1	0	0
08:00:00	1	1	0	0	0	2	0	0	6	2	5	0	0	9	1	8	0	34	0	0	9	0		0	1	0	0	0		0	27	0	0	0	0	2	0	16	0	11	0	19	27	21	0	0	0	0	0
[truncated: 283 more columns]

## Sheet: Fig 4 S2 B (HFD Kir2.1)
FED (Kir2.1~BD-AD-AKHR)	FED1																FED2												FED3																+sucrose	+sucrose SEM	+sucrose survival		ST (Kir2.1~BD-AD-AKHR)
20:30:00	50	27	40	25	45	33	39	18	33	55	24	20	29	44	64	58	69	33	31	38	29	40	4	47	37	67	23	38	47	46	57	35	46	37	41	34	32	37	39	41	50	32	49		39.1395	2.00514	1		20:30:00
21:00:00	78	61	49	56	49	66	65	43	58	56	63	64	20	72	52	79	72	75	0	39	41	54	45	60	60	116	63	56	65	62	65	76	53	47	85	62	33	58	58	59	63	57	44		58.1163	2.71948	1		21:00:00
21:30:00	55	59	47	27	24	80	34	7	50	1	22	7	17	82	38	22	32	20	7	60	18	42	54	0	64	94	3	57	3	11	65	41	13	42	33	34	12	28	29	54	41	12	22		34.0233	3.59178	1		21:30:00
22:00:00	12	39	15	0	20	10	6	0	20	1	0	0	0	78	4	33	30	8	5	29	0	52	76	0	15	104	0	68	0	0	27	3	0	28	38	5	9	12	7	15	14	0	20		18.6744	3.72664	1		22:00:00
22:30:00	0	0	0	13	1	0	0	0	0	0	0	0	0	7	0	2	0	0	0	0	0	12	154	0	28	53	0	30	0	0	0	0	0	11	0	0	3	4	0	0	0	0	21		7.88372	3.82988	1		22:30:00
23:00:00	0	0	0	1	14	0	0	0	0	0	10	0	15	0	0	11	0	0	6	0	0	0	4	0	56	0	0	0	0	0	0	0	0	3	0	0	23	5	0	0	0	0	25		4.02326	1.54715	1		23:00:00
23:30:00	0	0	0	0	8	0	0	0	0	0	0	0	6	5	0	0	0	0	0	0	0	0	0	0	1	0	0	0	13	0	0	0	0	0	0	0	21	0	0	0	0	0	22		1.76744	0.775338	1		23:30:00
00:00:00	0	0	0	1	17	0	0	0	0	2	0	0	0	0	0	0	0	0	9	0	0	0	0	0	0	0	0	0	0	0	0	0	0	0	0	0	58	0	0	0	0	0	5		2.13953	1.40541	1		00:00:00
00:30:00	0	0	0	4	2	0	0	0	0	21	0	0	0	0	0	4	0	0	2	0	0	0	0	0	1	0	0	0	1	0	0	0	0	0	0	0	28	0	0	0	0	0	14		1.7907	0.85658	1		00:30:00
01:00:00	0	0	0	0	0	0	0	0	0	0	0	0	0	0	0	0	0	0	0	7	0	0	0	3	0	0	0	0	0	0	0	0	0	0	0	0	29	0	0	0	0	0	13		1.2093	0.746018	1		01:00:00
01:30:00	0	0	0	3	5	0	0	0	0	0	0	0	0	6	0	1	0	0	5	0	0	1	0	0	1	0	0	0	0	0	0	0	0	0	0	0	11	0	0	0	0	0	18		1.18605	0.516886	1		01:30:00
02:00:00	0	0	0	3	1	0	0	0	0	0	0	0	0	0	0	4	0	0	9	0	0	0	0	0	0	0	0	0	0	0	0	0	4	0	0	0	0	0	0	0	0	0	36		1.32558	0.862483	1		02:00:00
02:30:00	0	0	0	0	8	0	0	0	0	0	0	0	2	0	0	4	0	1	0	0	0	0	0	6	4	0	0	0	0	0	0	0	9	0	0	0	2	0	0	0	0	0	25		1.4186	0.648904	1		02:30:00
03:00:00	0	0	0	3	7	0	0	0	0	6	0	0	0	0	0	2	0	4	18	0	0	0	0	16	11	0	0	0	0	0	0	0	1	0	0	0	0	0	0	0	0	0	19		2.02326	0.74448	1		03:00:00
03:30:00	0	0	0	0	0	0	0	0	0	0	0	0	0	0	0	0	0	0	14	0	0	0	0	6	0	0	0	0	0	0	0	0	0	0	27	0	0	0	0	0	0	0	18		1.51163	0.810624	1		03:30:00
04:00:00	0	0	0	0	4	0	0	0	0	0	0	0	1	0	0	0	0	7	25	0	0	0	0	17	16	0	0	0	0	0	0	0	0	0	32	0	0	0	0	0	0	0	31		3.09302	1.24728	1		04:00:00
04:30:00	0	0	0	1	0	0	0	0	0	0	0	0	0	0	0	0	0	0	10	4	0	0	0	2	0	0	0	0	0	0	0	0	0	0	13	0	34	1	0	0	0	0	12		1.7907	0.896998	1		04:30:00
05:00:00	0	35	4	2	1	0	0	0	0	0	0	0	0	0	0	0	0	0	18	0	0	0	0	4	8	0	0	0	0	0	0	0	0	0	9	0	20	1	0	0	0	0	14		2.69767	1.0563	1		05:00:00
05:30:00	0	0	4	0	7	0	0	0	0	0	0	0	0	0	0	0	0	0	22	0	0	0	0	5	1	0	0	0	0	0	0	0	0	0	6	0	1	3	0	0	0	0	5		1.25581	0.565816	1		05:30:00
06:00:00	0	3	4	0	0	0	0	0	0	0	0	0	0	0	0	0	0	0	16	0	0	0	0	0	1	0	0	0	0	0	0	0	0	0	2	0	0	6	0	0	0	0			0.761905	0.415732	0.976744		06:00:00
06:30:00	0	15	8	0	5	0	0	0	0	0	0	0	0	0	0	0	0	0	13	0	0	0	0	0	8	0	0	0	0	0	0	0	0	0	0	0	4	7	0	0	0	0			1.42857	0.552833	0.976744		06:30:00
07:00:00	0	0	5	0	3	0	0	0	0	0	0	0	0	0	0	0	0	0	0	0	0	0	0	0	4	0	0	0	0	0	0	0	0	0	0	0	0	0	0	0	0	0			0.285714	0.164454	0.976744		07:00:00
07:30:00	0	0	13	0	1	0	0	0	0	0	0	0	0	0	0	0	0	0	0	0	0	6	0	0	0	0	0	0	0	0	0	0	0	0	0	0	0	0	0	0	0	0			0.47619	0.337783	0.976744		07:30:00
08:00:00	0	12	0	0	0	0	0	0	0	0	0	0	0	0	0	0	0	0	0	0	0	3	0	0	0	0	0	0	0	0	0	6	0	0	0	0	0	0	0	7	0	0			0.666667	0.356891	0.976744		08:00:00
08:30:00	0	5	7	0	8	7	0	0	0	0	0	0	0	0	0	0	4	6	0	0	0	0	5	0	31	0	0	0	0	0	0	0	0	0	13	0	0	0	0	0	1	0			2.07143	0.839911	0.976744		08:30:00
09:00:00	37	42	75	44	61	48	43	31	44	38	45	32	17	41	41	31	45	76	59	17	17	40	69	42	51	55	32	29	63	44	44	54	46	37	61	41	30	34	41	44	57	35			43.6429	2.13369	0.976744		09:00:00
09:30:00	74	55	52	51	53	86	49	49	58	53	69	58	40	57	69	67	75	60	35	79	59	52	65	63	51	81	57	49	74	69	40	53	60	53	76	59	31	35	53	60	56	53			58.0476	1.93145	0.976744		09:30:00
10:00:00	83	54	39	55	58	77	44	42	66	51	44	50	38	58	71	106	69	43	38	48	51	52	58	68	57	77	66	48	73	69	78	44	67	45	69	36	14	37	55	52	49	37			55.619	2.54231	0.976744		10:00:00
10:30:00	74	73	21	25	57	63	55	17	78	59	33	61	21	67	60	59	95	56	37	60	65	44	41	91	54	62	83	52	54	53	73	27	71	50	68	27	31	31	25	42	42	15			51.7143	3.1465	0.976744		10:30:00
11:00:00	27	64	6	9	50	74	54	8	97	41	45	30	14	68	85	81	71	38	16	32	32	44	24	19	53	62	35	38	42	46	57	23	74	75	62	2	29	23	18	37	40	5			41.6667	3.72403	0.976744		11:00:00
11:30:00	68	60	15	29	32	79	39	0	43	27	15	8	25	55	53	80	51	40	0	26	39	34	37	41	50	58	33	37	45	20	21	15	79	34	63	0	30	21	13	46	22	7			35.4762	3.27633	0.976744		11:30:00
12:00:00	61	56	2	22	16	16	47	0	35	28	25	3	41	31	35	64	101	24	0	30	30	30	19	83	29	65	7	0	43	11	25	7	72	17	32	18	27	20	13	4	12	0			28.5952	3.66213	0.976744		12:00:00
12:30:00	11	48	0	47	19	0	40	0	0	35	14	20	21	26	23	51	57	34	21	11	30	52	0	5	47	6	5	0	21	34	4	1	64	15	12	13	28	17	0	0	11	0			20.0714	2.8565	0.976744		12:30:00
13:00:00	40	33	0	38	0	0	12	0	8	28	15	26	16	23	0	34	41	19	5	8	6	30	0	45	43	11	26	0	12	31	11	8	97	24	41	1	15	15	0	0	19	0			18.5952	2.9465	0.976744		13:00:00
13:30:00	28	38	0	36	4	0	45	1	32	22	23	2	14	28	27	13	31	1	4	0	5	5	0	1	41	42	11	0	32	48	54	33	40	6	29	26	6	22	0	1	28	3			18.619	2.56392	0.976744		13:30:00
14:00:00	29	31	0	7	32	0	31	0	0	6	17	0	10	34	1	90	38	5		6	12	18	5	23	3	24	24	3	5	6	11	0	10	0	6	5	0	13	0	1	1	34			13.1951	2.67628	0.953488		14:00:00
14:30:00	0	22	0	29	2	0	9	0	0	34	7	0	17	28	10	30	53	35		2	20	8	6	0	14	26	4	23	1	0	3	0	60	1	20	0	11	16	0	0	7	6			12.2927	2.33224	0.953488		14:30:00
15:00:00	0	0	78	27	0	21	0	0	11	14	20	0	11	21	0	67	34	22		64	3	45	10	0	9	3	40	20	5	0	0	0	36	25	44	0	20	18	0	0	0	2			16.3415	3.18564	0.953488		15:00:00
15:30:00	17	9	38	45	26	40	12	0	0	8	15	20	12	27	0	25	69	24		23	19	33	39	3	17	53	97	27	37	29	53	46	53	16	33	0	18	24	0	33	30	0			26.0976	3.19886	0.953488		15:30:00
16:00:00	18	15	55	44	19	32	38	24	0	3	28	10	32	39	3	32	39	26		51	25	17	1	0	8	51	1	12	31	0	0	3	15	25	22	0	27	21	0	0	0	26			19.3415	2.55682	0.953488		16:00:00
16:30:00	32	23	16	29	28	8	51	11	33	26	27	1	27	21	41	49	36	29		28	13	6	0	5	6	15	0	0	25	25	18	27	32	85	35	12	14	13	11	11	12	14			21.8293	2.55546	0.953488		16:30:00
17:00:00	10	43	4	8	32	71	99	10	23	27	15	4	27	41	23	39	26	29		27	7	40	0	0	5	10	18	0	35	27	25	19	18	22	36	34	4	20	62	18	15	117			26.5854	3.82689	0.953488		17:00:00
17:30:00	10	19	21	37	33	68	46	9	15	6	11	26	29	32	0	42	22	18		15	7	17	43	0	6	33	5	0	27	40	8	0	4	16	39	12	10	14	37	0	0	0			18.9512	2.53126	0.953488		17:30:00
18:00:00	5	28	19	15	40	29	36	77	13	7	19	30	33	39	57	46	12	24		66	27	22	15	10	6	16	67	0	2	2	6	7	23	13	50	27	24	14	23	9	16	10			24	2.92716	0.953488		18:00:00
18:30:00	41	29	13	18	31	31	37	0	23	29	35	16	25	34	22	46	7	22		53	27	20	4	36	29	19	36	15	38	3	8	8	37	46	41	30	31	37	40	13	23	19			26.1463	2.01384	0.953488		18:30:00
19:00:00	37	57	55	44	24	33	54	29	31	28	33	22	25	51	35	66	55	27		38	43	54	31	50	35	47	20	31	43	19	34	26	42	35	40	10	24	20	41	9	30	24			35.4146	2.04641	0.953488		19:00:00
19:30:00	32	38	41	35	32	54	54	9	49	27	45	42	24	52	49	45	66	36		35	36	45	5	34	41	48	32	105	46	29	47	42	60	39	52	29	31	14	34	37	39	45			40.3659	2.51429	0.953488		19:30:00
20:00:00	64	44	45	41	32	54	52	56	63	27	45	33	24	66	50	83	78	38		24	42	60	17	60	35	66	28	58	68	44	45	47	61	40	46	48	26	28	50	55	49	69			47.8293	2.42268	0.953488		20:00:00
20:30:00	72	44	44	38	46	50	43	43	57	31	52	39	31	63	55	67	82	73		26	46	45	31	70	35	52	53	32	67	53	71	57	69	48	53	61	31	27	49	60	49	73			50.9268	2.27054	0.953488		20:30:00
21:00:00	86	77	78	48	32	92	47	69	89	41	46	79	31	91	66	54	103	62		45	62	63	75	82	45	107	98	58	105	67	84	82	104	54	62	85	10	61	59	66	72	54			68.0732	3.45589	0.953488		21:00:00
21:30:00	5	14	0	3	41	19	0	9	0	13	11	5	1	80	1	30	19	4		26	0	81	77	9	9	108	21	57	5	0	13	3	0	24	42	10	2	34	0	57	4	0			20.4146	4.20583	0.953488		21:30:00
22:00:00	0	22	0	0	23	0	0	0	0	46	10	0	0	26	0	39	18	0		1	0	43	23	0	13	16	4	0	218	0	0	0	0	3	10	0	3	8	0	0	0	0			12.8293	5.49544	0.953488		22:00:00
22:30:00	0	22	0	0	23	0	0	0	0	11	10	0	3	10	0	10	2	0		0	0	9	0	0	10	0	0	0	111	0	0	0	0	0	10	0	0	11	0	1	0	0			5.92683	2.78616	0.953488		22:30:00
23:00:00	0	0	0	0	37	0	0	0	0	0	1	0	0	0	0	47	15	0		0	0	0	0	0	1	0	1	0	29	0	0	0	0	0	7	0	6	6	0	1	0	0			3.68293	1.60276	0.953488		23:00:00
23:30:00	0	19	0	0	25	0	0	0	0	19	2	0	0	0	0	15	5	0		0	0	0	0	0	6	0	1	0	0	0	0	0	0	0	13	0	2	7	0	0	0	0			2.78049	0.969984	0.953488		23:30:00
00:00:00	0	39	0	0	22	0	0	0	0	11	1	0	0	5	0	24	2	0		0	0	1	0	0	13	0	2	0	0	0	0	0	0	0	19	0	0	9	0	0	0	0			3.60976	1.30985	0.953488		00:00:00
00:30:00	4	4	0	3	19	0	0	0	0	6	3	0	0	8	0	10	0	0		0	0	0	0	0	14	0	1	0	0	0	0	0	0	0	29	0	0	2	0	0	0	0			2.5122	0.922035	0.953488		00:30:00
01:00:00	21	0	0	3	13	0	0	0	0	12	1	0	0	6	0	0	0	0		0	0	0	0	0	27	0	2	0	0	0	0	6	0	0	12	0	0	1	0	0	0	0			2.53659	0.940354	0.953488		01:00:00
01:30:00	2	0	0	3	9	0	0	0	0	3	1	0	0	0	0	24	0	0		0	0	1	18	0	8	0	0	0	0	0	0	0	0	0	32	0	15	7	0	0	0	0			3	1.10376	0.953488		01:30:00
02:00:00	31	13	0	0	10	0	0	0	0	30	21	0	6	14	0	3	0	0		0	0	8	0	0	5	0	0	0	0	0	0	0	0	0	10	0	23	4	0	0	0	0			4.34146	1.30038	0.953488		02:00:00
02:30:00	5	14	0	0	5	0	0	0	0	18	4	0	4	33	0	18	0	0		0	0	0	40	0	9	0	0	0	1	0	0	1	0	0	1	0	13	7	0	0	0	0			4.21951	1.39403	0.953488		02:30:00
03:00:00	0	108	0	8	3	0	0	0	0	1	0	0	0	10	0	41	0	0		0	0	8	6	0	10	0	0	0	0	0	0	0	0	0	9	0	16	2	0	0	0	0			5.41463	2.80004	0.953488		03:00:00
03:30:00	3	66	0	6	3	0	0	0	0	6	2	0	1	56	0	27	0	0		0	0	4	0	14	4	0	0	0	0	0	0	0	0	0	9	0	24	8	0	0	0	0			5.68293	2.20045	0.953488		03:30:00
04:00:00	6	53	0	4	11	0	0	0	0	23	0	0	0	17	0	21	0	0		0	0	0	0	35	7	0	0	0	0	4	0	0	0	0	0	0	22	14	0	0	0	0			5.29268	1.75695	0.953488		04:00:00
04:30:00	16	2	0	1	3	0	0	0	0	1	6	0	1	24	0	23	0	0		0	0	15	0	0	0	0	0	0	0	1	0	24	0	0	6	0	23	4	0	0	0	0			3.65854	1.17058	0.953488		04:30:00
05:00:00	4	0	0	3	7	0	0	0	0	5	6	0	0	3	0	0	0	0		0	0	1	0	0	16	0	0	0	0	0	0	5	0	0	7	0	24	1	0	0	0	0			2	0.735842	0.953488		05:00:00
05:30:00	0	15	0	2	0	0	0	0	0	1	5	0	6	8	0	11	0	0		0	0	11	0	0	0	0	0	0	0	0	0	10	0	0	0	0	30	7	0	0	0	0			2.58537	0.914634	0.953488		05:30:00
06:00:00	2	1	0	7	0	0	0	0	0	17	0	0	0	4	0	0	9	0		0	0	4	0	0	22	0	0	0	0	0	0	0	0	0	20	0	27	5	0	0	0	0			2.87805	1.03429	0.953488		06:00:00
06:30:00	20	1	0	2	5	0	0	0	0	0	2	0	6	2	0	0	17	9		0	0	10	12	0	24	0	0	0	0	0	0	0	0	0	9	32	25	4	0	0	0	0			4.39024	1.26389	0.953488		06:30:00
07:00:00	0	6	0	2	0	0	6	0	0	16	0	0	1	27	0	0	0	0		0	0	14	0	0	3	0	0	0	0	0	0	0	0	0	3	0	18	4	0	0	0	0			2.43902	0.914683	0.953488		07:00:00
07:30:00	0	0	0	1	0	0	0	0	0	31	8	0	3	36	0	6	0	1		5	0	2	4	0	0	0	0	0	5	0	0	0	0	0	0	0	8	0	0	0	0	0			2.68293	1.16002	0.953488		07:30:00
08:00:00	8	8	0	0	0	0	0	0	0	13	3	0	0	12	0	0	0	6		4	0	6	33	0	0	0	0	0	0	2	0	0	0	0	0	15	0	0	0	0	0	0			2.68293	0.975579	0.953488		08:00:00
08:30:00	12	9	7	0	0	0	7	0	0	71	6	0	0	14	0	0	32	0		0	0	23	11	10	39	0	0	0	17	0	0	23	0	0	39	54	0	8	0	0	5	0			9.43902	2.54018	0.953488		08:30:00
09:00:00	59	59	36	41	50	40	37	35	40	57	52	40	29	55	43	40	53	41		37	26	40	55	68	37	44	32	34	60	44	39	67	36	47	67	59	13	32	48	33	60	25			44.1463	1.95952	0.953488		09:00:00
09:30:00	67	57	50	48	55	62	48	59	60	58	75	47	41	79	52	63	81	43		66	63	64	65	79	56	69	60	52	91	64	57	74	66	67	63	62	10	41	37	65	53	66			59.3902	2.1769	0.953488		09:30:00
10:00:00	66	54	46	47	48	61	60	64	54	44	63	71	33	82	43	65	106	62		52	52	58	51	66	47	51	54	41	63	83	52	52	79	53	63	54	23	37	49	69	47	33			56.0488	2.34805	0.953488		10:00:00
10:30:00	61	55	40	48	28	63	46	38	46	52	74	49	34	76	44	54	107	85		48	40	63	43	66	52	67	41	37	62	50	67	41	69	61	80	42	54	34	70	18	50	26			53.1951	2.71091	0.953488		10:30:00
11:00:00	39	51	26	51	43	89	61	34	40	42	43	36	33	70	32	56	91	53		49	42	52	44	61	70	53	35	27	60	33	50	35	48	42	67	27	22	20	43	30	38	3			44.9024	2.71666	0.953488		11:00:00
11:30:00	61	49	28	39	37	50	50	37	32	47	41	43	27	59	65	50	102	35		44	27	53	42	26	40	58	25	12	52	60	87	58	63	42	52	62		29	40	26	34	40			45.6	2.698	0.930233		11:30:00
12:00:00	8	55	3	30	28	54	59	6	4	34	52	28	22	89	7	52	56	30		22	21	54	6	10	20	46	20	0	61	69	26	52	70	18	59	22		23	34	12	38	27			33.175	3.48916	0.930233		12:00:00
12:30:00	0	46	4	20	45	57	46	18	0	38	23	0	28	81	28	49	65	19		5	8	38	30	4	13	59	30	0	49	15	33	35	36	30	50	15		21	0	1	30	1			26.75	3.29291	0.930233		12:30:00
13:00:00	0	31	26	39	37	31	44	2	8	29	15	2	26	71	9	67	28	15		77	29	36	3	0	38	52	11	0	35	10	27	14	11	29	39	19		13	17	0	13	0			23.825	3.1233	0.930233		13:00:00
13:30:00	2	51	25	39	34	3	118	0	2	26	17	0	22	79	0	38	47	13		53	6	22	0	48	13	33	37	0	24	18	16	1	44	109	48	2		18	0	0	12	0			25.5	4.4833	0.930233		13:30:00
14:00:00	0	72	51	8	38	21	33	0	7	17	18	2	7	69	2	32	47	13		68	53	34	26	92	4	15	60	0	28	54	2	25	56	40	37	0		18	0	0	22	22			27.325	3.85097	0.930233		14:00:00
14:30:00	0	18	38	17	54	11	18	0	18	28	18	24	27	75	0	39	5	14		59	17	19	60	79	100	17	5	9	27	14	19	29	58	29	35	1		19	0	0	1	59			26.5	3.8564	0.930233		14:30:00
15:00:00	0	27	15	22	10	3	34	0	0	18	18	80	1	82	2	33	46	5		72	55	32	45	11	6	8	38	2	0	8	0	0	2	54	39	0		14	0	0	0	52			20.85	3.81067	0.930233		15:00:00
15:30:00	89	43	46	20	8	28	31	16	20	23	37	65	26	67	38	28	24	21		22	5	27	32	51	6	23	39	37	47	38	61	58	69	85	48	47		26	14	33	51	47			37.4	3.16831	0.930233		15:30:00
16:00:00	26	9	10	26	39	4	22	0	0	31	36	24	12	104	0	2	34	28		193	45	49	56	74	20	42	42	36	18	10	10	0	20	41	53	0		18	0	6	5	9			28.85	5.51159	0.930233		16:00:00
16:30:00	17	13	6	21	36	1	22	0	0	17	27	18	19	62	4	42	23	18		6	15	20	0	17	13	26	39	2	3	18	5	3	5	26	12	0		20	28	5	8	0			15.425	2.14592	0.930233		16:30:00
17:00:00	5	38	28	42	22	2	44	0	23	19	34	14	19	71	30	36	45	29		187	22	30	0	0	8	5	1	15	33	34	24	2	7	23	21	12		19	15	14	0	0			24.325	4.86463	0.930233		17:00:00
17:30:00	0	33	31	34	28	25	52	0	6	30	36	15	24	56	9	41	30	10		5	0	20	0	5	7	2	0	0	47	15	23	8	24	33	49	7		22	8	7	1	0			18.575	2.61796	0.930233		17:30:00
18:00:00	18	39	41	22	22	40	32	8	20	27	38	19	27	64	36	40	34	28		74	24	39	1	27	13	48	0	0	13	22	91	21	37	24	29	24		23	37	29	28	0			28.975	2.91228	0.930233		18:00:00
18:30:00	22	39	37	40	26	55	53	14	34	29	47	33	26	56	40	38	51	31		90	19	34	2	23	22	19	26	1	58	36	47	34	46	38	48	30		21	35	35	10	28			34.325	2.59447	0.930233		18:30:00
19:00:00	36	50	45	49	44	74	42	23	41	37	48	34	26	63	22	52	41	29		40	35	51	9	47	37	36	14	38	62	47	64	48	59	51	47	54		29	42	49	48	40			42.575	2.09972	0.930233		19:00:00
19:30:00	56	40	52	31	33	58	50	45	38	37	45	36	25	59	44	43	87	40		32	44	47	23	47	46	55	33	44	53	38	58	48	65	37	48	61		31	43	53	46	51			45.55	1.88277	0.930233		19:30:00
20:00:00	53	59	65	41	33	58	60	49	60	33	53	25	25	71	53	44	68	61		40	66	53	16	71	50	54	34	55	66	44	72	48	76	34	51	62		32	54	54	49	60			51.3	2.25525	0.930233		20:00:00
20:30:00	49	54	75	36	33	57	62	47	73	41	65	33	26	73	54	54	92	54		85	59	59	27	72	51	74	50	58	95	49	78	64	84	41	56	74		35	49	71	60	57			58.15	2.70625	0.930233		20:30:00
21:00:00	88	96	70	21	41	79	66	75	106	54	72	35	41	117	91	82	119	60		36	73	72	81	104	49	90	99	82	131	79	94	94	117	66	96	90		55	96	94	94	72			79.425	3.94772	0.930233		21:00:00
21:30:00	23	62	17	7	36	27	5	0	45	53	15	2	7	84	70	48	19	9		24	19	66	73	79	26	71	23	43	63	5	25	19	82	30	59	45		70	27	51	37	1			36.675	4.03834	0.930233		21:30:00
22:00:00	1	24	1	17	6	17	4	0	0	46	38	4	4	99	15	33	23	10		0	7	46	26	94	24	30	0	81	80	39	5	19	0	2	17	0		42	0	26	26	0			22.65	4.19501	0.930233		22:00:00
22:30:00	1	0	5	1	12	0	1	0	0	10	4	2	5	45	0	15	0	15		10	0	15	0	19	18	13	0	8	12	6	0	6	0	9	24	0		36	0	0	20	0			7.8	1.63503	0.930233		22:30:00
23:00:00	4	0	0	14	26	0	35	0	0	11	23	0	4	30	20	48	0	15		13	0	1	0	2	25	8	0	0	0	3	0	0	0	0	20	0		13	0	0	15	0			8.25	1.88644	0.930233		23:00:00
23:30:00	0	0	1	27	18	9	2	0	0	13	5	0	4	5	0	15	31	0		11	0	21	0	0	17	22	0	0	0	5	0	0	0	0	14	0		16	0	0	4	0			6	1.37468	0.930233		23:30:00
00:00:00	7	13	1	29	19	0	12	0	0	51	4	8	4	25	42	0	16	0		80	0	49	0	8	4	9	0	4	0	0	0	0	0	1	14	0		7	0	0	0	0			10.175	2.77232	0.930233		00:00:00
00:30:00	1	9	0	5	10	0	4	0	0	12	5	0	14	42	15	24	31	13		10	0	21	0	33	4	8	0	0	0	7	0	0	0	0	7	0		14	0	7	11	0			7.675	1.62133	0.930233		00:30:00
01:00:00	1	0	0	11	22	0	0	0	0	16	5	0	1	3	22	19	10	0		7	0	4	0	19	6	20	0	0	0	0	0	0	0	0	6	0		7	0	9	26	0			5.35	1.24063	0.930233		01:00:00
01:30:00	0	5	0	21	6	0	1	0	0	14	2	3	4	40	13	7	3	0		0	0	15	0	0	2	9	0	0	0	0	0	2	0	0	12	0		0	0	17	0	0			4.4	1.27289	0.930233		01:30:00
02:00:00	2	13	0	18	20	0	0	0	0	19	0	0	0	8	4	23	0	1		0	0	4	0	5	2	0	0	0	0	0	0	0	7	0	23	0		8	0	0	0	0			3.925	1.11481	0.930233		02:00:00
02:30:00	12	3	0	11	31	0	2	0	0	12	0	0	5	4	15	5	0	5		0	0	14	11	0	1	7	0	0	0	0	0	0	0	0	9	0		13	0	0	0	0			4	1.03651	0.930233		02:30:00
03:00:00	1	2	0	12	22	0	0	0	10	30	32	0	1	4	0	0	0	12		0	0	0	0	6	0	45	3	0	0	0	0	0	6	0	9	0		6	8	0	0	0			5.225	1.60388	0.930233		03:00:00
03:30:00	0	0	0	3	4	0	8	0	18	21	20	0	4	10	12	42	0	12		39	8	11	9	2	43	0	7	0	38	0	0	0	2	0	6	0		9	0	0	0	0			8.2	1.95894	0.930233		03:30:00
04:00:00	13	2	0	2	0	0	0	0	3	10	14	0	0	11	0	0	0	1		6	5	24	0	20	28	0	0	0	4	0	0	0	0	0	8	0		0	0	0	0	0			3.775	1.11372	0.930233		04:00:00
04:30:00	0	1	0	13	22	0	3	0	0	9	14	0	22	42	0	20	0	0		59	2	1	0	0	2	4	0	0	0	0	0	11	0	0	0	12		28	0	0	0	0			6.625	2.02348	0.930233		04:30:00
05:00:00	0	0	0	11	2	0	2	0	0	10	11	0	16	51	1	4	4	0		3	0	14	0	0	0	8	52	0	0	0	0	0	0	0	0	0		2	0	0	0	0			4.775	1.84408	0.930233		05:00:00
05:30:00	0	5	0	23	2	0	0	0	0	6	1	0	17	5	0	0	0	0		10	0	2	0	0	3	5	0	0	0	0	0	5	0	0	13	12		4	0	0	0	0			2.825	0.832734	0.930233		05:30:00
06:00:00	35	9	0	2	3	0	2	0	0	0	3	0	1	1	0	11	0	0		53	0	21	0	0	0	8	3	0	0	0	0	4	2	0	12	16		4	0	0	0	0			4.75	1.66246	0.930233		06:00:00
06:30:00	6	3	5	2	3	0	0	0	5	4	0	0	3	15	11	8	0	0		0	9	21	0	0	1	2	2	0	0	0	0	2	0	0	22	0		7	0	34	0	0			4.125	1.15647	0.930233		06:30:00
07:00:00	2	18	22	6	5	0	1	0	8	6	15	0	0	9	0	0	0	0		0	15	2	0	3	0	0	0	0	5	20	0	0	38	0	6	0		6	0	0	0	0			4.675	1.28721	0.930233		07:00:00
07:30:00	4	18	10	0	0	0	0	0	2	13	1	0	0	26	0	17	11	0		0	0	0	0	17	0	0	4	0	0	0	0	0	4	0	5	0		2	0	0	0	0			3.35	1.01309	0.930233		07:30:00
08:00:00	5	0	24	0	0	0	0	0	0	30	2	0	7	0	0	1	42	0		0	0	0	0	6	0	6	12	0	0	0	0	4	0	0	0	0		0	0	0	0	0			3.475	1.40237	0.930233		08:00:00
[truncated: 275 more columns]

## Sheet: Fig 4 S3 A (ND NachBac)
FED (NachBac~BD-AD-AKHR)	FED1																FED2															+sucrose	+sucrose SEM	+sucrose survival		ST (NachBac~BD-AD-AKHR)	ST1
20:30:00	7	4	15	7	26	34	21	3	1	0	11	21	4	23	7	5	5	24	8	9	0	0	37	21	6	12	6	21	9	17		12.1333	1.84748	1		20:30:00	1	0	8	0	6	13	2	74	14	2	4	0	0
21:00:00	35	20	29	37	55	44	49	29	26	20	43	52	40	30	38	42	26	59	44	48	34	13	55	32	28	39	27	30	45	33		36.7333	2.06611	1		21:00:00	27	24	61	8	48	47	35	12	42	13	4	18	12
21:30:00	30	19	42	38	37	39	67	10	22	27	60	22	36	12	23	6	18	47	14	44	28	26	37	44	42	38	17	42	54	20		32.0333	2.72767	1		21:30:00	40	52	68	42	94	68	49	46	32	12	25	46	5
22:00:00	24	6	14	15	20	20	52	1	26	30	72	17	64	54	10	30	18	65	22	0	6	70	46	31	29	19	6	58	13	21		28.6333	3.90416	1		22:00:00	44	59	71	60	58	59	59	51	16	1	13	50	1
22:30:00	10	24	0	17	21	7	33	17	17	54	29	49	16	2	3	3	20	15	0	0	0	24	16	34	1	17	19	36	12	31		17.5667	2.61854	1		22:30:00	41	58	66	45	75	53	59	57	0	0	2	49	0
23:00:00	5	17	18	6	31	4	15	7	9	10	10	53	18	1	4	8	14	27	6	23	27	17	9	20	8	5	1	15	0	9		13.2333	2.0204	1		23:00:00	45	43	65	55	67	37	48	44	4	0	0	51	0
23:30:00	7	18	13	1	4	8	4	0	0	13	16	36	5	0	1	8	15	6	0	36	33	26	25	42	5	8	2	11	0	6		11.6333	2.23632	1		23:30:00	43	49	54	51	69	35	37	38	11	0	0	45	0
00:00:00	4	26	55	8	13	5	8	0	7	20	24	12	6	0	17	54	8	13	0	0	21	3	26	60	0	8	12	20	0	1		14.3667	2.99904	1		00:00:00	55	63	54	52	70	37	43	21	7	0	1	45	0
00:30:00	13	11	21	10	8	5	27	2	15	21	9	32	5	3	2	54	1	8	33	0	19	4	15	20	0	14	5	4	0	6		12.2333	2.22766	1		00:30:00	44	54	50	49	50	29	38	23	17	7	0	50	0
01:00:00	0	41	20	9	17	12	36	18	10	24	25	58	29	0	2	2	19	3	5	0	18	7	9	39	0	20	4	12	0	4		14.7667	2.65515	1		01:00:00	35	62	47	45	53	25	41	37	12	14	0	45	0
01:30:00	5	23	37	36	16	17	12	5	0	13	15	19	8	4	0	55	12	7	11	0	7	0	8	36	36	18	3	9	0	8		14	2.49367	1		01:30:00	45	44	37	45	46	33	46	23	0	0	0	38	0
02:00:00	1	12	72	35	20	16	32	6	0	12	33	28	10	6	4	0	4	9	0	0	14	5	1	40	13	28	7	1	19	14		14.7333	2.91762	1		02:00:00	60	32	45	33	45	17	34	31	0	6	0	36	0
02:30:00	0	22	0	18	19	24	3	4	7	3	44	31	0	10	8	2	6	2	15	0	20	0	15	55	0	8	9	5	0	1		11.0333	2.47446	1		02:30:00	42	54	30	35	38	44	55	22	0	0	0	24	0
03:00:00	1	36	35	3	12	8	42	0	8	4	42	13	0	3	3	3	6	7	0	0	2	0	10	32	0	4	3	6	0	16		9.96667	2.4195	1		03:00:00	49	32	26	40	46	16	57	31	6	0	0	23	0
03:30:00	3	33	29	0	9	19	66	6	2	9	6	12	0	15	22	17	2	0	4	0	0	0	14	81	0	5	0	28	0	1		12.7667	3.51244	1		03:30:00	41	50	34	37	37	44	40	41	0	34	0	6	0
04:00:00	22	3	34	7	5	16	32	3	2	5	10	6	0	6	10	0	2	36	18	0	0	23	29	6	0	6	0	5	0	10		9.86667	2.02951	1		04:00:00	61	39	38	35	48	55	53	25	17	0	0	3	0
04:30:00	18	6	22	0	4	7	0	0	11	0	64	8	0	31	1	5	1	1	52	0	0	0	10	8	0	9	17	4	0	2		9.36667	2.79675	1		04:30:00	42	42	22	24	33	30	48	23	9	5	0	1	0
05:00:00	29	7	72	0	12	12	0	0	0	10	34	8	9	0	0	0	0	0	24	0	0	20	13	0	0	0	0	11	0	9		9	2.77095	1		05:00:00	30	33	19	24	61	18	50	20	10	0	0	0	0
05:30:00	13	9	80	0	4	16	0	0	0	5	3	13	54	2	11	0	9	0	35	0	0	20	26	27	71	0	0	1	0	0		13.3	3.86738	1		05:30:00	9	40	12	19	37	36	41	23	4	0	1	1	0
06:00:00	9	5	26	0	2	14	0	2	1	1	6	17	0	6	2	0	3	5	26	0	0	24	47	14	51	4	7	10	0	5		9.56667	2.41865	1		06:00:00	7	33	20	18	51	39	38	19	0	0	0	1	0
06:30:00	14	8	15	1	0	26	5	14	4	4	21	9	7	3	22	0	18	6	21	0	0	18	41	3	56	0	2	8	0	2		10.9333	2.37706	1		06:30:00	3	44	8	21	36	48	32	15	0	0	13		0
07:00:00	1	2	40	4	14	6	0	0	1	0	34	0	56	0	24	0	0	4	23	0	0	12	0	15	11	6	0	1	0	14		8.93333	2.53614	1		07:00:00	3	23	1	42	32	48	26	54	0	0	7		0
07:30:00	2	3	0	16	1	5	0	1	6	10	0	6	0	2	2	0	0	44	0	50	3	6	6	10	22	0	4	0	0	5		6.8	2.20522	1		07:30:00	1	13	0	25	32	46	16	23	0	0	0		4
08:00:00	1	35	8	0	0	0	4	0	1	4	38	6	0	31	0	0	0	16	0	0	21	18	3	12	0	49	0	0	4	1		8.4	2.45399	1		08:00:00		7	0	18	32	18	13	9	0	0	0		0
08:30:00	0	15	22	25	3	13	1	26	0	8	50	16	0	4	4	0	0	5	0	0	0	0	0	15	0	6	1	3	0	21		7.93333	2.1145	1		08:30:00		6	0	1	21	54	10	17	0	0	0		0
09:00:00	3	47	52	29	32	27	25	39	14	31	41	40	20	21	49	3	20	27	17	3	22	26	36	46	15	49	31	29	30	15		27.9667	2.50034	1		09:00:00		24	2	45	0	50	9	36	35	21	14		3
09:30:00	0	37	64	44	32	47	53	67	26	47	53	42	21	30	63	9	30	41	20	10	24	19	49	64	31	57	35	30	48	0		36.4333	3.40948	1		09:30:00		9		49	0	74	4	52	36	21	21		19
10:00:00	0	39	55	45	24	48	34	48	21	38	50	23	17	23	70	129	21	35	9	0	28	21	43	52	32	36	46	29	43	0		35.3	4.47885	1		10:00:00				35	0	62		21	35	24	29		36
10:30:00	0	49	62	43	29	33	46	42	15	59	48	22	31	18	66	79	27	34	18	12	31	8	46	44	42	20	37	39	34	14		34.9333	3.30549	1		10:30:00				45	3	49		44	38	27	32		49
11:00:00	0	42	50	36	30	31	63	28	36	38	44	27	35	24	62	41	10	29	2	0	30	9	46	38	25	25	29	31	39	0		30	3.02556	1		11:00:00				37	2	34		61	36	29	38		48
11:30:00	0	48	44	26	40	33	33	20	9	37	40	17	14	23	57	24	39	32	37	0	26	7	32	38	19	9	19	21	25	0		25.6333	2.67963	1		11:30:00				43		8		35	22	16	39		55
12:00:00	0	41	37	20	32	47	37	16	10	51	41	15	11	25	55	44	19	31	0	0	31	0	36	25	26	10	26	29	18	13		24.8667	2.84897	1		12:00:00				56				39	21	16	38		66
12:30:00	0	56	57	10	35	22	40	20	32	43	11	12	14	16	57	27	26	30	0	0	25	10	31	40	15	12	29	29	39	9		24.9	2.97049	1		12:30:00				38				29	25	12	34		60
13:00:00	28	47	97	22	14	26	33	7	7	41	25	18	11	16	37	31	10	19	20	0	43	1	48	38	7	30	32	16	3			25.069	3.63919	0.966667		13:00:00				53				26	22	10	30		62
13:30:00	74	47	42	11	17	23	35	10	6	60	21	8	13	15	63	35	18	10	0	0	25	9	16	41	3	12	23	17	7			22.7931	3.58959	0.966667		13:30:00				45				16	25	3	20		63
14:00:00	4	57	45	36	34	20	39	4	25	27	21	20	13	31	39	81	4	21	35	26	18	6	9	29	14	6	25	42	36			26.4483	3.20813	0.966667		14:00:00				44				10	19	4	12		64
14:30:00	0	33	27	14	14	19	39	3	31	31	13	5	7	17	30	39	17	12	0	0	28	4	12	30	9	0	14	21	0			16.1724	2.32414	0.966667		14:30:00				56				5	21	0	9		64
15:00:00	0	47	48	0	7	29	14	28	3	29	7	0	7	23	23	33	0	16	0	0	14	6	17	24	9	2	9	3	1			13.7586	2.60667	0.966667		15:00:00				43					31	0	6		55
15:30:00	0	35	37	0	20	16	14	9	21	45	20	0	11	21	30	24	0	18	0	0	12	10	19	22	2	2	34	14	0			15.0345	2.39277	0.966667		15:30:00				37					17	0	2		31
16:00:00	0	33	34	0	37	27	23	2	15	48	1	0	1	19	22	61	2	10	0	2	24	28	8	21	12	4	34	6	13			16.7931	2.99605	0.966667		16:00:00				25					28	0	3		22
16:30:00	0	39	23	25	9	27	25	4	13	15	7	21	27	13	14	119	2	11	0	2	0	9	21	20	24	0	14	2	7			17	4.11653	0.966667		16:30:00				13					27	0	2		20
17:00:00	0	28	40	1	29	25	12	9	10	37	10	0	8	15	23	38	31	17	0	3	7	13	29	17	28	5	48	0	7			16.8966	2.57802	0.966667		17:00:00				6					12	0	0		19
17:30:00	0	33	33	23	32	36	36	23	16	42	18	25	23	31	47	71	10	38	11	12	46	18	39	44	42	19	19	31	55			30.1034	2.82029	0.966667		17:30:00				3					25	16	4		12
18:00:00	0	40	32	21	50	43	19	43	25	30	15	12	24	18	41	69	22	28	0	26	43	13	29	33	39	34	24	29	7			27.8966	2.79132	0.966667		18:00:00									41	0			14
18:30:00	130	33	21	24	28	26	27	24	24	15	31	0	17	16	16	22	14	19	0	0	11	49	24	26	29	15	21	17	2			23.4828	4.29188	0.966667		18:30:00									19	0			12
19:00:00	0	41	22	20	20	30	36	13	18	30	10	11	23	17	9	39	0	27	0	0	26	30	24	35	36	15	23	17	3			19.8276	2.28729	0.966667		19:00:00									26	2			12
19:30:00	0	22	32	12	49	37	37	37	28	42	27	2	16	21	46	33	7	24	9	0	24	18	25	34	34	14	23	18	4			23.2759	2.54027	0.966667		19:30:00									23	3			12
20:00:00	0	50	32	14	28	40	47	35	29	38	31	8	24	19	48	32	13	23	26	2	29	23	45	47	25	20	27	24	17			27.4483	2.44777	0.966667		20:00:00									26	8			6
20:30:00	0	48	43	46	33	41	48	63	32	46	51	38	34	20	51	67	35	37	4	22	26	19	46	50	42	21	38	42	34			37.1379	2.8209	0.966667		20:30:00									19	32			2
21:00:00	0	81	67	82	48	76	58	62	44	68	91	81	51	20	85	37	66	79	82	51	51	19	60	60	56	74	36	78	86			60.3103	4.15942	0.966667		21:00:00									12	77			2
21:30:00	0	38	14	25	0	40	44	17	49	24	41	4	22	20	13	17	42	12	6	1	8	7	4	30	3	41	28	15	17			20.069	2.80479	0.966667		21:30:00									4	45			2
22:00:00	0	22	0	0	4	6	12	4	4	7	18	0	4	2	0	24	3	4	11	0	0	5	3	16	1	6	0	12	0			5.7931	1.27729	0.966667		22:00:00									0	41			1
22:30:00	0	13	0	0	5	10	0	5	0	0	1	0	1	5	0	0	8	10	0	0	0	0	9	9	0	9	0	10	0			3.27586	0.816843	0.966667		22:30:00									4	29			1
23:00:00	0	6	3	11	0	25	2	2	16	4	22	0	5	7	0	8	3	0	0	0	0	11	14	11	0	6	0	0	0			5.37931	1.2831	0.966667		23:00:00									2	20
23:30:00	0	7	0	31	0	30	11	8	1	36	11	7	2	5	1	53	7	0	0	0	0	13	0	14	0	3	22	11	0			9.41379	2.44623	0.966667		23:30:00									5	21
00:00:00	0	8	19	0	18	45	11	7	4	2	18	5	9	6	0	28	8	0	0	0	0	2	15	2	6	10	7	4	4			8.2069	1.84856	0.966667		00:00:00									2	13
00:30:00	0	54	12	0	14	23	0	13	0	14	2	3	7	10	0	71	20	3	0	0	0	18	7	8	0	10	9	11	33			11.7931	3.05063	0.966667		00:30:00										19
01:00:00	0	28	22	0	8	22	10	13	0	12	0	4	5	0	4	6	6	3	0	0	0	3	12	14	0	2	20	20	21			8.10345	1.5915	0.966667		01:00:00										38
01:30:00	0	59	20	0	17	0	16	25	0	4	7	3	5	2	10	2	6	4	0	0	0	9	2	11	0	5	22	6	4			8.24138	2.24906	0.966667		01:30:00										34
02:00:00	0	37	41	0	6	16	5	19	46	10	23	20	1	10	13	15	8	19	0	0	0	2	4	10	0	2	28	6	0			11.7586	2.41284	0.966667		02:00:00										28
02:30:00	0	11	9	0	4	11	5	57	0	8	0	1	7	7	6	4	16	10	0	0	0	4	1	25	0	2	19	9	0			7.44828	2.12398	0.966667		02:30:00										25
03:00:00	0	10	8	0	11	18	5	29	0	10	0	0	2	11	14	2	12	11	0	0	1	2	6	23	4	0	12	6	0			6.7931	1.40054	0.966667		03:00:00										31
03:30:00	0	31	10	9	13	12	7	2	4	1	0	5	1	4	2	15	0	5	0	0	0	4	15	7	0	13	15	29	0			7.03448	1.53408	0.966667		03:30:00										30
04:00:00	0	25	7	16	4	18	11	35	6	23	0	14	0	11	12	50	4	13	0	0	5	1	0	0	20	1	4	5	0			9.82759	2.21786	0.966667		04:00:00										25
04:30:00	0	9	1	15	7	12	3	5	1	5	0	0	0	7	1	19	7	3	0	0	18	7	11	4	0	3	0	12	0			5.17241	1.06219	0.966667		04:30:00										19
05:00:00	0	7	0	4	4	23	16	2	0	8	0	3	8	3	2	2	0	4	0	0	22	1	2	9	29	1	5	5	0			5.51724	1.41214	0.966667		05:00:00										19
05:30:00	0	12	51	12	9	11	5	3	3	9	0	3	0	60	0	36	3	17	0	0	0	22	4	3	14	4	1	2	2			9.86207	2.79149	0.966667		05:30:00										17
06:00:00	0	4	9	10	20	4	16	7	5	2	0	16	0	22	0	0	14	4	0	0	0	0	6	2	25	5	0	10	1			6.27586	1.38063	0.966667		06:00:00										17
06:30:00	0	8	37	2	2	10	1	1	1	2	0	14	4	18	6	3	6	0	0	0	0	2	8	12	0	10	0	8	0			5.34483	1.45226	0.966667		06:30:00										11
07:00:00	0	17	27	21	10	6	0	6	0	3	0	4	7	5	5	27	19	0	0	0	0	24	4	10	0	5	0	8	0			7.17241	1.62119	0.966667		07:00:00										4
07:30:00	0	12	2	5	49	5	12	1	19	5	0	27	4	8	2	15	3	12	0	0	0	1	0	9	0	0	0	6	0			6.7931	1.95414	0.966667		07:30:00										0
08:00:00	1	10	0	13	4	0	10	3	1	8	0	4	36	4	0	8	2	0	0	0	0	3	3	8	0	15	2	1	0			4.68966	1.37277	0.966667		08:00:00										3
08:30:00	0	6	31	21	8	57	0	23	4	1	0	22	7	3	0	2	0	8	0	0	0	20	11	15	0	3	0	4	0			8.48276	2.37786	0.966667		08:30:00										0
09:00:00	0	48	45	70	28	43	55	58	6	38	40	48	35	18	59	12	31	40	25	2	5	8	48	43	13	32	34	50	35			33.4138	3.49825	0.966667		09:00:00										37
09:30:00	0	59	52	55	40	45	66	63	8	48	58	33	37	25	54	22	29	48	20	0	31	70	60	56	35	52	32	45	30			40.4483	3.50038	0.966667		09:30:00										39
10:00:00	0	59	45	44	31	44	54	62	14	44	54	24	30	24	42	20	25	42	12	33	30	51	53	59	37	37	19	53	24			36.7586	2.95185	0.966667		10:00:00										25
10:30:00	0	46	42	47	31	34	54	60	9	50	56	26	20	16	50	37	25	31	5	14	36	9	45	62	26	36	18	38	32			32.931	3.14037	0.966667		10:30:00										28
11:00:00	0	43	44	45	36	34	57	51	11	28	52	17	18	10	46	43	24	30	25	15	28	16	44	41	43	31	29	41	26			32	2.64808	0.966667		11:00:00										21
11:30:00	0	43	35	35	33	31	39	40	9	27	42	11	23	13	42	19	33	40	5	4	33	19	36	29	24	33	37	33	34			27.6552	2.32902	0.966667		11:30:00										22
12:00:00	0	48	34	32	36	29	41	44	6	36	33	11	22	16	42	47	19	35	0	0	24	20	35	45	24	25	22	40	22			27.1724	2.64066	0.966667		12:00:00										22
12:30:00	0	42	49	21	42	28	22	37	15	33	36	16	24	12	21	27	15	39	1	0	29	12	39	38	21	28	17	33	27			24.9655	2.4102	0.966667		12:30:00										29
13:00:00	0	38	46	7	29	22	41	34	15	31	35	16	23	6	33	79	6	26	0	0	20	9	31	38	36	15	14	36	19			24.3103	3.17126	0.966667		13:00:00										12
13:30:00	0	38	30	0	35	23	29	33	14	28	38	10	19	10	30	22	20	16	0	1	42	6	28	31	19	16	16	30	23			20.931	2.27317	0.966667		13:30:00										5
14:00:00	0	42	47	4	31	20	18	11	3	22	16	9	11	7	8	3	17	19	0	20	24	10	27	47	15	11	12	37	2			17	2.48493	0.966667		14:00:00										4
14:30:00	0	50	28	0	27	20	28	12	4	22	10	0	20	8	2	38	7	23	0	0	10	20	26	16	16	9	16	30	0			15.2414	2.38512	0.966667		14:30:00										4
15:00:00	0	38	59	0	31	19	19	5	4	23	2	18	11	0	5	106	8	15	0	0	15	17	25	20	14	20	10	30	2			17.7931	4.02192	0.966667		15:00:00										8
15:30:00	0	38	44	3	31	19	18	11	14	28	2	4	13	3	6	62	8	18	0	0	10	19	19	26	17	6	16	17	2			15.6552	2.6879	0.966667		15:30:00										7
16:00:00	0	33	95	0	30	23	25	17	10	26	6	7	21	2	30	19	14	23	0	2	1	12	26	28	20	8	21	23	0			18	3.40168	0.966667		16:00:00										4
16:30:00	0	32	31	1	35	22	17	2	23	20	5	9	22	4	25	42	6	16	0	0	7	12	19	20	21	15	11	30	0			15.4138	2.20697	0.966667		16:30:00
17:00:00	0	21	81	9	27	30	41	49	1	20	18	16	26	2	20	21	8	17	0	0	34	28	31	42	20	18	19	45	31			23.2759	3.26833	0.966667		17:00:00
17:30:00	0	36	43	16	37	24	30	41	1	17	10	6	28	6	11	24	7	24	12	0	14	27	29	27	24	17	24	37	0			19.7241	2.39606	0.966667		17:30:00
18:00:00	0	32	80	8	52	24	23	53	4	20	13	45	21	2	6	38	10	25	0	0	12	29	25	33	16	24	23	23	0			22.1034	3.47168	0.966667		18:00:00
18:30:00	0	30	44	11	34	25	39	49	5	23	8	9	32	3	22	19	8	30	0	0	12	25	21	40	24	25	25	38	1			20.7586	2.66923	0.966667		18:30:00
19:00:00	0	27	24	24	33	38	38	41	9	26	28	13	24	4	39	77	10	26	0	0	30	25	33	36	14	29	16	27	2			23.8966	3.02752	0.966667		19:00:00
19:30:00	0	30	29	36	33	35	58	47	7	21	37	11	26	2	40	79	16	37	0	0	25	31	29	37	23	30	15	36	3			26.6552	3.36611	0.966667		19:30:00
20:00:00	0	39	48	45	31	33	62	48	8	32	41	24	21	2	40	55	17	31	2	0	46	42	44	46	26	33	15	54	21			31.2414	3.27163	0.966667		20:00:00
20:30:00	0	40	49	48	43	35	57	51	7	35	55	39	24	8	38	28	18	32	61	0	47	26	51	57	32	42	24	45	41			35.6207	3.13781	0.966667		20:30:00
21:00:00	0	73	58	77	66	63	68	62	10	41	78	84	41	6	71	109	52	58	60	50	36	23	38	54	34	89	33	72	62			54.069	4.67435	0.966667		21:00:00
21:30:00	0	22	10	45	20	66	45	19	7	15	38	45	29	8	27	0	21	5	18	0	0	14	3	18	5	57	7	27	7			19.931	3.33438	0.966667		21:30:00
22:00:00	0	20	1	1	24	22	17	7	10	9	13	0	18	5	3	8	5	4	11	0	0	11	10	14	3	3	29	3	0			8.65517	1.508	0.966667		22:00:00
22:30:00	0	12	5	3	4	15	23	19	30	6	13	0	18	4	0	4	7	5	0	0	0	8	3	9	2	2	15	17	0			7.72414	1.48465	0.966667		22:30:00
23:00:00	0	20	8	0	6	19	10	12	3	1	0	24	17	7	2	0	8	14	0	0	0	23	4	6	0	5	16	19	0			7.72414	1.48299	0.966667		23:00:00
23:30:00	0	10	3	0	7	10	43	0	12	0	0	0	9	4	0	2	9	15	8	0	0	6	4	4	0	5	8	38	0			6.7931	1.91724	0.966667		23:30:00
00:00:00	0	19	9	0	2	8	20	8	6	7	0	0	13	6	0	110	6	46	0	0	0	6	2	12	0	0	10	19	0			10.6552	3.98095	0.966667		00:00:00
00:30:00	0	13	19	6	14	6	25	2	6	8	10	0	11	2	0	0	3	4	0	0	0	20	3	14	2	3	8	0	0			6.17241	1.29138	0.966667		00:30:00
01:00:00	0	5	8	1	8	14	31	19	19	6	0	0	7	0	22	96	28	6	0	0	0	16	6	8	0	6	15	19	0			11.7241	3.44374	0.966667		01:00:00
01:30:00	0	6	18	3	11	23	140	15	16	6	0	0	6	8	5	6	12	12	0	0	0	9	11	12	0	14	10	16	0			12.3793	4.71331	0.966667		01:30:00
02:00:00	0	15	10	20	5	19	15	13	5	8	2	0	6	6	9	10	5	3	0	0	0	16	6	1	0	6	7	16	0			7	1.16285	0.966667		02:00:00
02:30:00	0	28	1	17	7	13	10	4	15	6	10	11	4	3	9	0	1	29	0	0	0	15	1	5	0	7	13	11	0			7.58621	1.47184	0.966667		02:30:00
03:00:00	0	37	10	21	11	31	14	9	16	5	0	25	5	3	9	0	1	13	0	0	0	20	3	5	0	3	10	3	0			8.75862	1.85274	0.966667		03:00:00
03:30:00	0	18	0	4	11	16	18	1	30	7	0	2	7	2	5	9	4	5	0	0	0	13	2	9	0	0	2	1	28			6.68966	1.54577	0.966667		03:30:00
04:00:00	0	17	6	10	13	5	0	6	6	10	0	5	2	0	6	21	6	2	0	0	6	11	2	3	0	0	7	6	14			5.65517	1.02946	0.966667		04:00:00
04:30:00	0	4	46	5	3	7	11	1	6	0	7	0	8	0	14	195	4	1	17	0	27	4	9	7	4	0	13	1	0			13.5862	6.7248	0.966667		04:30:00
05:00:00	0	8	1	9	3	14	18	3	14	3	3	5	6	2	5	32	9	5	0	0	3	3	2	4	0	3	11	1	12			6.17241	1.27796	0.966667		05:00:00
05:30:00	0	32	0	16	6	4	15	3	4	6	0	1	2	0	9	2	11	5	41	0	7	1	2	10	1	5	8	2	0			6.65517	1.75415	0.966667		05:30:00
06:00:00	0	12	2	14	16	5	21	5	27	5	0	4	0	4	22	27	1	10	0	0	7	7	4	7	0	9	6	6	0			7.62069	1.49829	0.966667		06:00:00
06:30:00	0	15	0	12	2	1	5	5	0	0	5	8	2	11	15	0	2	0	0	0	0	1	0	3	0	9	24	16	0			4.68966	1.19121	0.966667		06:30:00
07:00:00	0	12	0	14	12	18	13	7	18	2	0	7	0	0	17	138	0	8	0	0	0	6	5	8	43	0	15	6	0			12.0345	4.8162	0.966667		07:00:00
07:30:00	0	8	0	12	2	12	0	6	10	0	0	10	0	4	13	0	4	1	0	0	0	0	4	0	9	0	0	0	0			3.27586	0.845004	0.966667		07:30:00
08:00:00	0	8	0	9	9	3	0	0	3	0	0	0	2	0	0	0	3	0	0	0	0	4	0	3	0	0	5	0	0			1.68966	0.525468	0.966667		08:00:00
[truncated: 220 more columns]

## Sheet: Fig 4 S3 B (HFD NachBac)
FED (NachBac~BD-AD-AKHR)	FED1														FED2																FED3															+sucrose	+sucrose SEM	+sucrose survival
20:30:00	7	0	19	21	92	60	0	44	23	33	44	33	66	67	56	58	36	34	61	9	55	55	55	49	73	57	31	48	30	25	49	1	23	54	34	9	11	40	49	31	11	23	47	15		37.2273	3.26828	1
21:00:00	86	48	49	56	91	72	9	60	31	41	59	58	87	70	96	71	65	63	84	63	83	92	88	70	78	68	65	70	77	72	78	38	71	51	60	35	46	90	76	81	53	15	81	55		64.8182	3.00322	1
21:30:00	81	20	53	25	32	54	18	61	40	17	52	0	53	40	50	28	33	7	101	72	74	82	72	63	7	56	43	94	8	87	19	22	15	26	22	28	8	86	16	60	0	6	72	5		41.0909	4.32112	1
22:00:00	2	21	51	4	14	23	0	68	20	26	29	0	18	5	2	0	5	0	8	3	27	75	0	20	0	0	48	80	42	65	9	22	0	0	35	20	3	80	57	0	0	1	12	6		20.4773	3.6931	1
22:30:00	0	18	0	10	38	6	0	14	18	9	23	7	0	7	3	0	0	0	0	0	0	4	0	0	0	0	5	3	37	31	0	9	0	0	61	16	7	23	4	6	0	5	10	23		9.02273	1.96171	1
23:00:00	0	14	19	0	23	16	0	50	9	25	25	42	4	4	0	0	0	0	17	0	0	3	28	43	0	0	0	0	42	8	9	4	0	0	47	15	0	5	0	2	0	12	5	0		10.7045	2.23076	1
23:30:00	3	4	36	5	16	5	0	2	4	25	10	0	24	7	28	0	0	0	13	0	15	45	32	0	0	4	0	8	64	0	6	10	2	4	49	0	20	15	9	1	0	18	0	0		11	2.26005	1
00:00:00	10	1	0	43	17	3	0	6	6	36	31	2	4	2	0	0	19	0	16	0	10	6	8	11	0	0	25	21	0	0	0	9	9	0	34	30	80	1	50	7	0	10	20	0		11.9773	2.51433	1
00:30:00	0	0	24	0	0	7	0	12	4	11	14	31	23	6	0	0	6	0	21	0	4	0	0	17	0	4	18	9	20	0	0	0	15	0	30	0	8	0	5	32	0	12	19	0		8	1.48246	1
01:00:00	0	0	28	0	61	9	0	9	14	5	16	9	10	42	0	57	20	0	0	0	20	0	1	0	0	3	0	45	8	0	7	6	28	0	30	1	18	18	0	13	0	13	20	0		11.6136	2.35111	1
01:30:00	0	0	21	0	0	30	38	31	9	12	11	0	15	43	0	45	16	0	25	0	32	0	0	7	0	0	0	65	8	0	8	1	18	0	65	30	0	8	36	32	0	5	3	0		13.9545	2.70051	1
02:00:00	11	0	58	0	7	21	0	36	10	5	37	0	0	25	0	149	13	15	25	0	45	12	0	0	6	0	12	16	14	0	0	8	2	10	0	14	13	14	5	18	0	11	0	0		13.9091	3.71398	1
02:30:00	0	0	66	6	11	5	13	10	1	15	13	0	14	8	0	45	0	12	22	0	2	2	0	29	27	0	39	1	12	0	19	13	5	40	22	25	30	1	11	6	0	0	0	0		11.9318	2.23096	1
03:00:00	1	0	31	0	6	5	0	15	2	6	19	34	8	13	0	37	0	19	0	0	0	11	49	8	8	0	25	10	28	0	49	7	16	35	19	19	14	41	61	7	0	10	0	0		13.9318	2.38773	1
03:30:00	32	0	4	0	8	15	0	5	0	11	9	25	0	4	0	0	21	51	0	0	13	22	0	9	14	0	18	0	0	0	8	7	16	13	2	3	0	17	0	11	0	4	0	0		7.77273	1.59474	1
04:00:00	18	0	0	0	0	7	31	6	6	26	11	0	7	8	0	0	16	0	10	0	8	26	0	24	4	0	0	19	0	0	5	18	2	0	12	0	0	16	5	8	0	0	0	0		6.65909	1.31182	1
04:30:00	0	0	0	0	0	11	48	12	0	16	17	5	42	4	0	0	0	0	10	0	7	36	1	0	0	0	11	0	0	24	23	3	15	4	9	0	51	0	10	13	0	0	0	0		8.45455	2.0104	1
05:00:00	17	0	0	0	0	6	0	0	3	8	47	9	8	4	0	34	0	7	0	0	0	11	0	8	0	31	9	0	0	35	0	7	40	0	6	13	3	0	24	7	0	3	0	20		8.18182	1.83583	1
05:30:00	0	0	0	8	0	5	7	0	1	9	14	0	0	8	0	39	0	8	0	0	7	7	0	18	2	14	35	0	0	10	22	0	7	0	14	1	0	0	11	15	0	40	0	22		7.36364	1.5905	1
06:00:00	0	0	0	31	0	3	0	0	0	18	6	0	14	3	0	1	0	1	11	0	0	1	0	42	0	0	13	0	0	1	0	0	0	25	9	0	0	30	8	36	0	1	0	12		6.04545	1.64116	1
06:30:00	0	0	14	26	30	12	0	5	3	17	14	0	0	0	0	92	0	0	0	0	0	7	0	22	0	0	0	0	0	23	2	25	22	16	10	0	0	20	4	4	0	0	0	7		8.52273	2.37977	1
07:00:00	0	0	53	17	7	29	0	0	4	1	4	0	25	0	26	113	0	0	2	2	3	42	0	24	5	0	0	0	0	0	0	0	0	16	9	6	0	0	16	34	0	0	22	5		10.5682	3.0718	1
07:30:00	0	0	0	12	0	8	8	0	0	5	5	0	1	5	0	19	0	0	0	0	0	9	0	10	0	0	0	0	10	24	0	13	13	23	0	0	0	1	11	11	0	0	9	0		4.47727	0.995491	1
08:00:00	0	0	14	51	21	13	9	0	0	0	7	0	14	0	10	0	0	18	0	0	35	20	0	0	0	0	0	0	50	15	0	6	0	0	0	5	0	1	6	3	0	0	31	0		7.47727	1.93922	1
08:30:00	0	0	31	0	0	28	0	9	0	0	12	0	10	0	28	0	4	1	0	0	4	41	0	16	0	91	26	0	74	0	0	11	2	0	16	16	0	0	4	14	3	2	15	0		10.4091	2.8693	1
09:00:00	54	27	64	29	105	52	13	22	14	9	34	32	46	46	31	5	58	39	54	24	61	34	26	49	25	60	42	23	38	24	44	49	27	43	27	50	12	47	55	63	29		35	30		38.3953	2.84076	0.977273
09:30:00	61	38	57	39	57	45	29	30	4	35	26	27	58	53	55	27	52	42	62	40	60	44	53	46	45	71	62	51	75	65	60	42	40	34	40	63	28	47	40	67	22		42	56		46.2791	2.27128	0.977273
10:00:00	77	26	90	25	57	41	17	29	5	28	37	18	46	60	47	49	66	41	65	36	64	50	51	49	48	52	51	55	60	33	55	38	44	37	36	61	13	44	53	76	19		47	33		44.8605	2.71385	0.977273
10:30:00	50	35	39	22	90	49	29	30	0	34	40	16	52	60	40	26	45	46	49	31	55	40	57	53	41	51	56	49	57	46	70	32	42	34	25	51	18	44	48	60	22		47	44		42.4419	2.39284	0.977273
11:00:00	55	18	62	43	56	49	31	33	7	17	35	20	60	50	40	53	46	30	45	17	47	37	43	42	39	65	40	52	57	23	60	23	53	22	38	55	29	29	77	51	14		48	45		40.8372	2.39599	0.977273
11:30:00	66	21	45	23	62	38	22	32	2	29	35	27	39	61	46	60	55	40	44	38	45	42	34	50	31	63	78	67	53	36	67	23	35	39	16	63	23	31	29	52	14		24	51		40.7209	2.58377	0.977273
12:00:00	51	11	42	40	52	27	6	32	0	30	35	70	41	58	39	47	43	10	35	15	18	50	27	31	34	46	24	45	41	22	42	25	34	41	25	47	21	29	22	51	12		22	44		33.4186	2.26906	0.977273
12:30:00	64	3	35	20	51	36	28	35	0	36	28	20	100	56	27	106	41	8	33	22	28	42	32	40	34	62	6	49	38	16	70	13	27	32	23	58	18	24	32	43	39		33	22		35.5814	3.32667	0.977273
13:00:00	66	1	44	20	41	12	0	36	0	16	24	17	58	50	35	11	32	20	11	0	30	34	19	19	53	52	3	46	29	18	34	14	16	26	27	69	6	28	10	37	2		22	0		25.3023	2.81322	0.977273
13:30:00	56	26	40	26	43	38	6	28	12	8	31	7	47	45	44	31	41	25	45	11	45	33	31	33	116	55	26	43	34	26	82	13	19	26	30	64	36	23	36	45	23		15	28		34.6977	3.05406	0.977273
14:00:00	64	14	37	24	75	23	43	9		14	23	1	36	49	26	51	22	15	11	1	63	52	40	15	31	38	20	39	4	11	32	12	10	38	27	53	32	16	27	34	12		26	23		28.4048	2.71467	0.954545
14:30:00	30	10	45	20	53	28	33	19		19	35	2	33	52	30	48	3	15	14	54	19	48	15	21	28	32	0	37	7	0	14	11	9	36	22	9	38	13	16	41	1		10	0		23.0952	2.46528	0.954545
15:00:00	53	12	37	28	52	14	20	14		13	28	1	27	41	30	6	9	2	1	0	1	9	3	15	30	10	0	36	1	40	9	20	54	50	27	12	38	15	32	36	0		14	0		20	2.56801	0.954545
15:30:00	50	17	38	39	49	9	0	7		11	30	0	36	48	6	30	2	1	0	5	0	28	0	15	22	0	0	20	1	1	27	10	37	31	24	7	11	20	16	26	0		12	29		17.0238	2.38766	0.954545
16:00:00	32	22	65	16	31	8	1	13		35	35	0	57	43	35	35	2	2	0	0	8	51	0	8	18	19	3	12	1	9	48	9	7	37	39	67	11	18	36	46	21		24	27		22.6429	2.92389	0.954545
16:30:00	13	14	44	22	69	16	0	3		15	34	25	21	46	45	22	0	25	0	0	14	19	3	3	28	5	0	17	1	0	22	7	2	19	27	13	42	11	24	39	0		8	0		17.0952	2.4985	0.954545
17:00:00	9	10	47	15	71	13	0	0		16	29	0	42	46	25	22	3	36	0	0	1	31	2	20	20	4	9	36	1	0	22	8	13	16	40	15	3	8	27	32	0		5	0		16.5952	2.57953	0.954545
17:30:00	0	18	24	25	60	17	0	51		24	25	1	32	50	42	73	23	34	69	30	63	48	54	25	44	57	8	18	10	22	19	3	17	18	33	11	25	10	33	38	25		14	0		28.4048	3.00369	0.954545
18:00:00	2	27	55	14	47	19	0	47		16	25	8	27	47	29	67	2	25	0	0	36	32	13	4	26	38	4	7	8	4	51	9	14	32	22	9	17	13	37	46	32		22	12		22.5	2.65566	0.954545
18:30:00	15	29	30	10	57	40	0	13		28	38	3	49	48	20	28	4	12	0	0	12	17	5	13	19	40	10	39	7	1	73	16	26	28	37	38	11	20	34	40	17		33	26		23.4762	2.60332	0.954545
19:00:00	1	6	26	11	51	43	0	13		26	34	4	30	49	29	32	7	29	55	0	13	27	27	14	52	61	4	47	4	13	41	11	50	33	36	40	10	14	33	43	14		25	11		25.4524	2.672	0.954545
19:30:00	19	0	29	26	58	46	17	15		25	27	1	43	39	35	30	4	28	33	7	27	34	48	17	21	66	10	28	13	0	42	24	19	36	44	40	28	16	28	48	11		23	42		27.3095	2.37815	0.954545
20:00:00	62	0	38	21	64	29	59	18		21	43	3	60	65	38	40	26	29	54	34	61	67	58	32	49	77	26	54	41	14	37	5	29	39	37	50	14	23	42	45	7		31	50		37.9048	2.94447	0.954545
20:30:00	45	1	38	23	26	62	12	40		38	25	2	39	54	62	34	25	69	62	52	81	64	59	31	32	79	34	65	81	34	35	14	35	50	45	57	17	32	43	46	8		38	49		41.381	3.12867	0.954545
21:00:00	84	58	44	45	76	18	98	60		20	46	73	91	64	93	69	84	82	105	73	113	93	81	54	54	89	78	88	95	70	75	31	85	75	53	97	40	60	57	62	57		66	60		69.4286	3.37669	0.954545
21:30:00	123	0	34	11	40	5	81	6		12	31	17	0	10	71	13	13	0	51	38	50	56	14	13	0	4	48	82	21	92	39	10	0	25	47	14	64	25	12	25	9		16	0		29.0952	4.47081	0.954545
22:00:00	0	0	51	7	34	3	43	0		6	9	0	2	4	6	0	5	0	24	0	5	0	0	2	0	0	0	16	7	14	10	19	9	5	49	3	0	1	65	6	0		0	0		9.64286	2.44589	0.954545
22:30:00	3	0	10	41	6	1	40	5		6	9	0	0	8	8	34	0	0	0	0	7	0	0	1	0	0	0	0	4	10	15	0	7	43	20	2	0	0	4	25	0		0	0		7.35714	1.85315	0.954545
23:00:00	19	10	3	13	16	2	42	0		10	7	0	2	7	8	0	35	0	0	0	0	3	0	10	0	0	10	0	2	0	9	0	13	12	12	5	3	0	6	6	11		4	0		6.66667	1.38041	0.954545
23:30:00	14	10	5	22	30	4	73	0		7	11	8	15	15	0	0	0	0	0	0	11	19	0	27	4	0	7	0	4	6	15	0	3	50	27	19	4	0	15	17	0		6	0		10.6667	2.24428	0.954545
00:00:00	35	26	4	19	13	1	43	3		18	17	0	7	9	0	11	0	0	0	0	11	1	0	8	33	0	0	0	0	14	0	0	22	12	25	2	37	4	2	8	0		0	0		9.16667	1.83871	0.954545
00:30:00	0	0	2	25	15	2	56	2		7	23	0	5	5	10	5	0	0	22	0	10	21	0	22	89	0	20	0	16	38	66	3	10	18	22	10	1	4	16	10	0		44	0		14.2619	2.99245	0.954545
01:00:00	16	35	7	7	21	1	26	37		5	23	0	39	8	6	49	0	0	21	0	10	12	0	11	10	3	0	0	13	9	8	39	18	20	49	18	8	2	3	7	0		23	0		13.4286	2.14491	0.954545
01:30:00	14	29	6	14	14	3	44	28		5	13	41	26	12	18	39	4	0	17	0	23	17	0	24	30	0	2	0	39	35	14	4	21	36	25	13	7	9	6	15	0		18	0		15.8333	2.0179	0.954545
02:00:00	0	3	3	7	12	0	48	27		5	16	0	18	11	0	0	0	0	22	0	6	7	0	24	118	0	0	0	1	0	1	0	22	0	10	2	16	10	9	4	0		0	0		9.57143	3.07044	0.954545
02:30:00	0	15	48	4	6	13	42	4		5	2	12	73	15	14	0	0	0	3	0	3	13	0	18	16	13	36	0	7	0	25	0	9	0	14	9	3	4	5	13	0		7	0		10.7381	2.30413	0.954545
03:00:00	0	0	6	8	0	1	10	5		5	7	0	15	6	2	65	44	0	0	0	20	4	0	22	11	0	9	0	2	0	0	0	9	0	8	9	0	5	2	23	0		12	0		7.38095	1.93865	0.954545
03:30:00	0	0	10	9	9	1	51	0		2	3	0	11	19	12	33	65	0	0	0	10	0	0	15	15	0	2	0	2	0	17	0	7	0	32	18	6	0	2	6	0		8	0		8.69048	2.1593	0.954545
04:00:00	0	0	10	5	6	3	22	11		4	9	0	19	4	14	0	0	0	0	0	6	9	0	5	13	16	2	0	7	0	4	2	4	0	26	0	33	1	4	8	0		28	0		6.54762	1.30451	0.954545
04:30:00	0	0	0	18	3	6	0	0		7	2	0	11	5	21	0	0	0	0	0	3	6	0	16	1	0	1	0	0	0	27	15	0	0	8	0	6	69	11	13	4		5	0		6.14286	1.8468	0.954545
05:00:00	0	0	13	0	0	6	20	0		3	5	0	29	6	16	0	0	0	0	3	7	3	0	11	10	0	1	0	0	18	0	18	0	8	6	4	3	0	9	25	0		0	0		5.33333	1.16704	0.954545
05:30:00	0	0	0	4	0	3	33	0		34	15	25	18	2	22	24	1	0	1	9	13	2	0	12	14	23	2	0	1	0	0	11	0	0	8	0	59	12	7	5	2		0	0		8.61905	1.92874	0.954545
06:00:00	0	0	8	9	5	4	17	4		2	9	20	15	7	32	63	0	0	25	0	8	4	0	51	28	55	0	0	16	21	0	0	0	0	12	1	0	3	3	17	4		0	0		10.5476	2.39172	0.954545
06:30:00	0	0	4	8	21	12	43	1		12	12	0	48	5	27	19	4	0	4	0	6	0	0	22	5	16	2	0	9	0	0	0	0	0	6	9	0	0	3	2	12		0	4		7.52381	1.71291	0.954545
07:00:00	0	0	25	0	0	19	4	0		7	25	0	9	8	19	39	0	0	0	0	12	3	0	42	24	39	0	0	0	63	0	1	0	30	13	9	0	0	2	1	74		0	30		11.8571	2.78051	0.954545
07:30:00	0	0	1	0	0	3	34	0		0	5	0	0	3	0	0	0	0	24	0	0	8	0	0	3	36	12	0	1	13	0	4	3	7	6	0	0	0	9	5	15		0	0		4.57143	1.3248	0.954545
08:00:00	0	0	5	0	0	11	22	0		0	1	0	12	2	0	11	0	0	0	0	4	52	0	1	0	17	5	0	0	21	1	1	5	45	0	0	7	0	6	1	9		0	50		6.88095	2.03146	0.954545
08:30:00	0	0	1	0	11	33	41	0		21	0	8	22	4	2	25	0	0	0	0	23	21	0	13	1	42	0	0	1	3	42	23	0	3	22	26	0	0	0	10	0		0	1		9.5	2.04657	0.954545
09:00:00	45	40	44	27	42	40	72	32		4	32	36	56	52	41	16	40	18	44	28	48	45	10	71	39	63	86	16	77	49	53	23	56	46	20	55	17	47	48	55	39		35	49		41.8095	2.76157	0.954545
09:30:00	58	39	50	46	51	57	72	50		11	32	20	61	66	61	49	51	22	67	45	69	62	46	38	55	76	90	48	81	44	53	36	59	44	34	77	40	40	58	60	38		32	57		51.0714	2.54857	0.954545
10:00:00	46	33	39	35	37	55	60	36		22	34	43	58	54	48	63	50	36	63	31	39	53	37	31	52	75	77	51	73	26	45	18	47	32	30	59	23	41	43	57	18		36	56		44.3333	2.28759	0.954545
10:30:00	41	26	30	32	49	56	37	36		6	31	30	34	62	49	54	56	22	60	31	58	67	38	37	32	67	70	50	55	30	51	33	48	44	37	78	8	24	40	38	31		32	43		41.7381	2.42376	0.954545
11:00:00	45	23	28	23	38	43	33	39		5	30	32	47	49	50	34	37	0	44	11	24	67	31	37	35	59	41	44	47	29	39	27	40	32	26	55	14	27	26	38	13		25	38		33.9286	2.11306	0.954545
11:30:00	35	33	24	19	31	46	15	53		7	26	33	48	48	45	39	46	4	39	5	28	59	37	25	16	54	48	26	44	16	34	23	30	26	30	55	20	27	30	31	16		17	41		31.6429	2.14996	0.954545
12:00:00	33	12	33	25	39	42	9	54		5	29	24	43	49	41	37	21	26	22	1	12	53	36	26	40	57	20	39	39	11	39	13	31	32	15	63	24	22	35	24	45		21	41		30.5476	2.23404	0.954545
12:30:00	27	15	25	29	51	31	2	55		4	31	20	38	49	28	48	12	0	39	0	7	42	17	18	31	57	3	26	29	9	31	20	14	11	22	77	26	18	38	36	7		17	33		26.0238	2.64454	0.954545
13:00:00	21	11	26	16	59	33	48	48		28	26	5	53	43	30	12	12	0	0	0	9	63	6	18	25	60	0	28	28	19	41	12	14	22	33	76	20	20	43	25	17		17	30		26.119	2.85503	0.954545
13:30:00	20	6	27	29	74	11	0	57		5	36	9	21	39	39	42	8	0	0	0	0	39	13	10	27	47	0	31	29	0	22	17	0	21	62	68	18	26	29	27	0		13	26		22.5714	3.02854	0.954545
14:00:00	28	20	26	32	39	11	9	34		16	18	4	18	50	40	14	22	22	36	20	30	26	32	33	34	36	20	45	32	19	43	8	6	31	26	63	17	27	29	34	12		25	49		27.0476	1.95891	0.954545
14:30:00	13	13	31	13	57	13	0	25		3	38	1	30	33	15	35	2	28	22	12	21	24	19	32	37	57	22	13	27	30	30	6	19	15	5	73	14	9	25	32	14		25	9		22.4286	2.37318	0.954545
15:00:00	9	23	15	12	48	5	0	34		4	24	0	16	20	9	86	3	1	0	0	0	15	4	11	15	42	0	10	0	8	11	4	9	17	11	49	13	14	26	23	41		11	2		15.3571	2.66321	0.954545
15:30:00	17	28	39	29	47	2	0	32		2	31	0	21	18	15	28	0	0	0	0	0	11	0	32	19	57	0	33	0	25	6	5	10	27	33	49	26	15	24	22	23		33	0		18.0714	2.42456	0.954545
16:00:00	50	16	29	21	66	18	0	24		3	25	0	11	40	9	29	3	1	2	1	1	13	1	13	16	21	27	10	3	14	25	21	7	13	26	61	19	20	21	10	15		20	14		17.5952	2.34361	0.954545
16:30:00	23	13	22	39	50	12	0	21		9	30	0	15	46	54	24	45	78	81	42	54	27	53	28	68	54	50	49	6	25	35	18	9	18	25	51	27	7	41	17	9		24	10		31.1667	3.1663	0.954545
17:00:00	20	8	18	44	66	19	1	17		2	33	58	20	46	63	19	20	2	24	1	11	15	26	4	20	43	3	18	6	6	27	0	13	38	28	49	27	19	40	21	8		24	39		23	2.67348	0.954545
17:30:00	0	34	23	24	71	1	30	27		3	72	2	54	46	17	46	2	17	10	0	6	12	17	13	17	37	4	10	11	4	35	6	18	23	19	53	13	22	39	14	39		14	40		22.5	2.87329	0.954545
18:00:00	24	4	22	18	43	12	22	8		3	24	9	41	42	6	96	1	24	7	0	2	28	3	10	16	42	0	45	10	29	32	0	13	11	3	39	14	25	21	16	9		20	8		19.0952	2.79015	0.954545
18:30:00	4	4	23	22	106	20	17	40		4	28	18	26	50	16	7	2	22	1	0	5	30	3	10	19	41	4	25	71	0	31	6	17	18	15	59	25	24	26	13	2		23	3		20.9524	3.22302	0.954545
19:00:00	6	4	43	12	68	3	14	29		4	29	2	41	50	27	21	10	24	2	10	5	44	13	17	24	62	1	17	6	7	12	2	30	34	23	64	30	34	34	12	11		18	22		21.9286	2.73052	0.954545
19:30:00	18	0	30	15	53	23	0	31		2	28	3	52	52	33	40	10	42	31	0	14	36	25	20	20	47	22	67	36	2	29	14	29	30	28	43	21	27	31	19	24		22	46		26.5476	2.45096	0.954545
20:00:00	24	2	36	25	61	36	4	37		3	30	1	54	42	50	18	29	43	55	2	52	47	52	39	23	49	33	45	25	16	49	5	35	41	32	71	22	38	20	37	5		34	57		32.8333	2.78392	0.954545
20:30:00	46	9	33	22	70	41	25	35		5	39	10	55	56	59	33	49	46	77	21	72	73	55	39	37	75	53	55	68	34	40	37	40	29	50	74	38	55	28	41	6		30	78		43.7619	3.05178	0.954545
21:00:00	76	57	21	37	90	30	71	49		4	45	44	69	73	95	31	95	53	91	59	94	89	56	53	49	84	96	77	83	59	63	57	84	77	36	87	31	51	34	29	48		79	79		61.5476	3.6477	0.954545
21:30:00	15	16	20	25	59	14	56	9		1	32	14	17	45	69	37	25	0	29	65	36	86	29	17	2	46	45	65	29	57	35	35	23	2	9	41	76	33	12	11	4		45	4		30.7143	3.43756	0.954545
22:00:00	0	0	9	6	38	12	0	0		0	27	0	3	31	8	0	0	0	8	0	0	8	0	15	0	0	8	20	17	6	4	5	1	0	15	27	0	9	3	9	3		64	6		8.61905	1.98688	0.954545
22:30:00	0	0	6	47	26	4	0	0		5	14	0	16	9	3	0	11	0	3	0	0	9	0	12	0	0	0	21	6	0	3	0	8	0	8	32	4	10	6	5	20		7	0		7.02381	1.53378	0.954545
23:00:00	0	0	10	24	51	2	0	12		0	9	0	31	6	8	0	51	0	0	3	3	0	0	3	0	0	0	50	13	0	44	0	0	0	13	6	7	6	10	4	10		10	0		9.19048	2.2681	0.954545
23:30:00	0	0	20	50	26	7	0	22		2	13	0	31	6	3	0	8	0	0	19	0	0	0	12	0	0	2	51	69	0	8	0	0	0	10	29	15	4	4	12	22		17	0		11	2.44807	0.954545
00:00:00	0	0	18	26	45	2	0	4		0	10	0	22	30	6	8	4	0	0	44	0	1	0	27	0	14	9	88	24	0	1	0	7	0	10	22	52	9	4	10	12		15	0		12.4762	2.77646	0.954545
00:30:00	0	0	10	66	16	1	0	71		0	13	0	16	28	4	0	4	0	0	40	0	1	0	17	0	0	8	50	9	0	47	0	3	0	25	47	31	14	3	14	11		15	0		13.4286	2.92336	0.954545
01:00:00	0	0	13	6	45	3	0	25		3	3	0	16	9	5	4	58	0	8	23	5	17	0	27	0	11	9	28	1	5	62	0	4	0	16	8	27	7	9	7	21		12	0		11.8333	2.29424	0.954545
01:30:00	7	0	30	6	29	1	0	6		0	11	0	14	8	6	8	9	0	19	16	5	16	0	57	0	64	7	15	3	11	41	0	7	0	7	29	12	18	8	12	0		14	0		11.8095	2.24856	0.954545
02:00:00	47	0	0	8	12	3	43	13		1	15	0	50	8	4	8	0	3	9	11	0	3	0	26	0	12	2	25	0	51	19	4	3	0	14	8	1	17	4	10	0		10	0		10.5714	2.16109	0.954545
02:30:00	32	0	9	5	19	2	54	21		0	5	0	18	8	5	20	60	6	0	6	4	10	0	10	0	12	37	75	5	36	30	0	18	1	19	9	17	24	3	6	9		7	0		14.3333	2.65247	0.954545
03:00:00	7	0	1	3	11	1	0	18		0	11	33	21	7	0	11	20	23	11	16	7	15	0	28	0	11	0	16	2	22	56	7	6	129	5	0	8	7	8	10	23		16	0		13.5714	3.30138	0.954545
03:30:00	24	0	8	4	11	0	0	27		0	5	0	62	11	16	0	3	31	1	33	0	16	0	19	0	7	22	5	1	10	28	13	16	23	22	13	2	4	6	7	14		6	12		11.4762	1.93213	0.954545
04:00:00	17	0	0	8	22	2	0	40		0	13	0	23	8	22	7	14	15	0	26	1	8	0	41	0	11	9	50	1	0	24	13	5	32	5	9	3	5	6	1	0		3	63		12.0714	2.30018	0.954545
04:30:00	14	0	9	22	5	2	0	36		13	7	1	14	9	24	0	0	18	0	40	5	17	0	52	0	9	58	20	0	0	0	7	10	40	11	1	12	4	4	4	0		0	10		11.381	2.24357	0.954545
05:00:00	15	0	7	2	45	2	1	1		2	10	25	4	5	43	18	0	15	0	14	4	17	0	14	7	4	35	0	19	4	38	17	18	18	17	9	1	3	3	22	1		1	22		11.5	1.87075	0.954545
05:30:00	13	0	5	9	9	3	26	1			0	29	23	2	14	67	0	3	4	7	10	3	0	3	42	10	0	46	1	15	0	19	0	17	12	21	6	9	0	8	17		11	11		11.6098	2.19753	0.931818
06:00:00	8	0	0	4	25	2	0	43			3	25	49	7	23	7	0	12	34	12	0	26	0	5	57	17	11	34	7	0	0	18	0	71	15	12	10	28	3	4	32		10	0		14.9756	2.68248	0.931818
06:30:00	0	0	16	5	7	5	13	31			4	20	22	3	6	29	35	8	13	38	3	24	0	7	11	6	0	41	1	0	5	0	6	26	5	2	0	0	5	4	0		2	1		9.85366	1.82749	0.931818
07:00:00	0	0	0	0	2	4	11	17			5	6	15	4	28	4	83	0	5	29	3	23	0	4	42	3	4	40	4	9	28	0	6	0	1	19	15	11	2	24	0		4	11		11.3659	2.50311	0.931818
07:30:00	0	0	0	6	5	0	4	12			0	0	22	0	8	0	0	0	6	8	11	44	0	28	51	16	1	6	4	8	9	0	0	0	4	3	11	0	0	3	0		1	0		6.60976	1.76859	0.931818
08:00:00	0	4	0	0	2	0	30	8			2	0	21	2	59	0	1	0	0	31	0	19	0	22	20	0	8	0	5	7	0	0	0	18	20	16	44	2	3	1	0		0	0		8.41463	2.10776	0.931818
[truncated: 294 more columns]

## Sheet: Fig 4 S4 A (ND ATG7 RNAi)
FED (ATG7 RNAi~BD-AD-AKHR)	M5-10.31																M8-11.8															M8-11.8																	+sucrose
20:30:00	0	33	2	21	29	19	10	19	43	37	15	45	15	57	15	49	13	79	45	51	85	44	38	23	35	75	50	49	75	39	65	44	34	57	31	85	37	9	78	33	65	36	58	27	32	41	56		40.383
21:00:00	0	2	0	0	0	0	35	0	6	0	3	0	1	0	0	22	0	0	0	0	0	0	70	0	1	0	4	0	1	0	1	2	0	53	0	37	0	0	37	13	45	26	17	0	0	67	4		9.51064
21:30:00	0	5	4	6	0	0	11	0	0	0	7	23	31	0	0	8	0	0	0	0	3	0	6	1	0	0	3	0	0	0	0	0	0	0	0	0	0	0	0	0	0	0	0	0	0	0	0		2.29787
22:00:00	0	0	1	0	0	0	0	0	1	0	0	0	0	0	0	0	0	0	0	4	1	0	15	3	0	0	0	0	0	0	0	6	0	0	0	0	1	0	0	0	0	0	0	0	1	0	0		0.702128
22:30:00	0	0	20	0	0	0	0	0	0	0	0	0	0	0	0	0	0	0	0	0	5	0	6	0	0	0	0	0	0	0	0	5	0	0	0	0	0	0	0	0	0	0	0	0	0	0	0		0.765957
23:00:00	0	0	0	0	0	0	0	0	8	0	15	0	0	0	0	0	0	0	0	15	5	0	0	1	0	0	0	0	0	0	0	17	0	0	0	0	0	0	0	0	15	0	0	0	1	0	0		1.6383
23:30:00	4	0	17	0	0	0	0	0	0	0	0	19	0	0	0	10	0	0	0	0	0	0	0	0	0	0	0	0	0	0	0	0	0	0	0	1	0	0	0	0	15	0	0	0	1	0	0		1.42553
00:00:00	0	0	0	0	0	24	0	0	0	0	0	45	0	0	0	2	0	0	0	37	0	0	0	0	0	0	0	0	0	0	0	0	0	0	0	0	0	0	0	0	0	0	0	0	0	0	0		2.29787
00:30:00	0	15	91	0	0	29	0	0	0	0	0	36	0	0	0	0	0	0	0	0	0	0	0	0	0	0	0	0	0	0	0	0	0	0	0	0	0	0	0	0	0	0	0	0	1	0	0		3.65957
01:00:00	0	0	7	0	0	41	0	0	0	0	0	10	0	0	0	0	0	0	0	2	0	2	0	0	0	0	0	0	0	0	0	6	0	0	0	0	0	0	0	0	0	0	0	0	0	0	0		1.44681
01:30:00	0	0	0	0	0	40	11	0	0	0	0	23	1	0	0	0	0	0	0	17	0	0	0	59	0	9	0	0	0	0	0	0	0	1	0	0	1	0	0	0	0	0	0	0	0	0	0		3.44681
02:00:00	0	0	0	0	0	13	0	0	0	0	0	0	0	0	0	0	0	0	0	4	2	5	0	40	0	0	0	0	0	0	0	0	0	0	0	0	0	0	0	0	0	0	0	0	0	0	0		1.3617
02:30:00	6	0	7	0	0	0	0	0	0	0	0	0	0	2	0	0	0	0	0	0	2	0	0	0	0	18	5	0	0	0	0	0	0	0	0	0	0	0	3	0	6	0	0	0	0	0	0		1.04255
03:00:00	3	0	6	0	0	7	0	0	42	0	0	0	0	0	0	0	0	0	0	1	2	0	0	2	0	0	2	0	0	0	0	0	0	0	0	0	0	0	0	0	21	0	0	0	0	0	0		1.82979
03:30:00	1	7	0	0	0	49	0	0	5	0	0	0	0	0	0	0	0	0	0	8	0	0	0	0	0	17	1	0	0	0	0	0	1	0	0	0	0	0	1	1	0	0	0	0	0	0	0		1.93617
04:00:00	0	0	3	0	0	41	0	0	0	0	0	0	0	0	0	0	0	0	0	0	0	0	0	1	0	0	0	0	0	0	0	0	0	0	0	0	0	15	0	0	0	12	0	0	0	0	0		1.53191
04:30:00	0	27	19	0	0	18	0	0	0	0	0	0	0	0	0	0	0	0	0	2	0	0	0	0	0	0	0	0	0	0	0	0	0	0	0	0	0	0	0	0	43	38	0	0	0	0	0		3.12766
05:00:00	0	0	39	0	0	55	0	0	0	0	0	0	0	0	0	0	0	0	0	3	0	0	0	1	0	0	0	0	0	0	0	0	0	0	0	0	0	0	0	0	0	0	0	0	0	0	0		2.08511
05:30:00	0	0	0	0	0	35	0	0	0	0	0	0	0	0	0	0	0	0	0	4	0	3	0	0	0	0	0	0	0	0	0	0	0	0	0	0	0	1	0	0	0	0	0	0	0	0	0		0.914894
06:00:00	0	0	0	0	0	31	0	0	0	0	0	0	0	0	0	0	0	0	0	23	0	0	0	1	0	26	0	0	0	0	0	0	0	0	0	1	0	0	0	0	74	0	0	0	0	0	0		3.31915
06:30:00	0	0	0	0	0	0	0	0	0	0	0	0	0	0	0	0	0	0	0	2	0	0	0	0	0	6	0	0	0	0	0	0	0	0	0	0	0	0	25	10	0	0	0	0	0	0	0		0.914894
07:00:00	0	0	21	0	0	0	1	0	0	0	0	0	0	17	0	0	0	0	0	1	0	25	0	1	0	30	0	0	0	0	0	0	0	0	0	0	0	3	0	31	0	3	0	0	1	0	0		2.85106
07:30:00	0	0	39	0	0	0	55	0	0	0	0	0	0	3	0	0	0	0	0	7	0	37	0	50	0	29	0	21	0	0	0	0	0	0	0	0	0	0	0	18	21	28	8	0	0	0	0		6.7234
08:00:00	0	0	19	0	0	0	22	0	0	0	0	0	19	0	0	0	0	0	10	37	0	20	0	0	0	0	0	57	0	0	0	0	0	0	0	0	0	13	42	0	58	0	0	0	16	0	0		6.65957
08:30:00	53	35	47	56	81	106	70	51	26	68	62	44	19	69	25	39	26	74	50	83	105	82	53	46	68	57	43	38	38	60	50	39	39	49	11	49	46	57	95	47	97	46	43	37	59	48	52	0.1	54
09:00:00	35	31	52	23	30	41	40	60	24	59	41	87	12	53	34	65	76	77	30	46	77	46	46	35	36	48	21	31	42	41	34	22	49	48	24	77	51	57	46	29	80	55	32	39	89	37	64	0.1	46.2128
09:30:00	56	21	33	48	34	39	37	59	10	29	23	25	4	59	40	54	24	59	44	46	41	28	40	34	18	21	29	39	27	28	43	38	31	9	13	33	29	35	58	32	41	43	9	26	52	56	42	0.1	34.8723
10:00:00	30	17	41	9	12	0	16	0	12	31	30	42	9	56	14	63	7	64	34	25	27	15	43	52	46	11	37	22	23	8	16	47	44	31	24	35	23	18	37	18	53	24	22	24	24	21	50	0.1	27.8085
10:30:00	13	7	43	10	38	17	32	33	3	4	20	24	7	33	6	36	2	51	11	24	6	11	23	69	21	19	26	27	35	0	10	0	13	16	1	43	12	12	47	8	29	52	3	13	51	6	39	0.1	21.4043
11:00:00	19	6	16	1	0	1	0	45	0	9	14	20	6	27	6	43	0	48	17	14	5	5	26	16	11	0	13	13	24	10	20	1	18	28	0	16	0	6	56	13	20	20	3	11	13	3	15	0.1	14
11:30:00	12	0	6	8	0	2	9	43	0	0	7	8	0	17	5	27	0	29	4	6	2	1	18	9	3	0	6	8	9	0	0	0	16	9	0	5	44	6	10	6	25	6	12	11	0	0	18	0.1	8.65957
12:00:00	10	11	7	0	2	1	0	13	0	0	10	19	7	11	0	12	0	13	0	24	0	0	15	13	11	2	1	7	4	0	5	0	11	0	0	4	0	0	43	0	27	47	8	2	63	0	6	0.1	8.70213
12:30:00	21	0	3	0	2	5	0	0	1	17	3	16	7	18	5	20	0	7	1	40	0	0	5	26	3	8	0	5	0	0	3	0	8	14	0	7	16	0	0	8	16	2	8	0	16	0	14	0.1	6.91489
13:00:00	0	3	4	0	12	7	0	0	0	13	6	12	2	5	13	27	0	15	2	3	0	0	11	6	1	7	2	4	0	3	0	0	0	14	0	8	0	0	37	0	37	3	3	0	9	0	10	0.1	5.93617
13:30:00	0	0	3	24	0	0	0	10	0	0	2	9	0	0	0	2	0	8	0	0	0	0	9	1	0	0	0	0	0	0	0	0	0	10	0	0	0	0	0	2	24	6	0	0	0	5	0	0.1	2.44681
14:00:00	0	0	4	1	0	0	0	0	0	0	1	5	0	0	0	10	0	0	0	0	0	0	2	0	0	0	1	5	0	0	0	0	0	0	0	0	0	4	31	0	9	7	12	0	0	0	0	0.1	1.95745
14:30:00	0	0	0	0	0	0	0	0	0	0	3	1	9	0	0	2	0	0	0	0	0	0	0	10	0	0	2	4	0	0	10	0	0	0	0	4	0	0	8	0	14	0	7	0	0	0	0	0.1	1.57447
15:00:00	0	0	2	1	0	0	0	0	0	0	0	26	0	0	1	0	0	0	0	0	0	0	18	7	0	0	1	2	0	0	0	0	0	0	1	0	0	0	3	0	7	0	28	0	10	0	10	0.1	2.48936
15:30:00	0	0	68	0	0	0	0	0	0	0	0	0	0	0	1	0	0	0	0	0	0	0	0	0	0	1	0	2	0	0	0	0	0	30	0	0	0	4	25	0	42	0	31	0	0	0	0	0.1	4.34043
16:00:00	0	0	88	0	0	0	0	0	0	0	0	0	0	0	1	0	0	0	0	0	0	0	0	14	0	0	5	1	0	0	0	0	0	1	0	0	0	0	23	0	11	0	1	0	0	0	1	0.1	3.10638
16:30:00	0	0	6	0	0	0	0	0	0	0	0	0	0	0	1	0	0	0	0	0	0	0	0	4	0	0	0	0	0	0	0	0	0	0	0	0	0	0	9	0	14	2	15	0	0	5	0	0.1	1.19149
17:00:00	0	0	0	0	0	0	0	1	0	0	0	4	0	0	3	0	0	0	0	28	0	0	3	2	0	0	0	0	0	0	0	0	0	0	0	0	0	0	48	0	6	9	18	0	0	5	6	0.1	2.82979
17:30:00	0	0	1	10	7	0	0	4	0	0	0	1	0	0	3	9	0	0	1	26	0	0	2	2	0	0	0	0	0	0	0	0	0	0	0	0	0	0	18	0	17	10	0	0	0	0	0	0.1	2.3617
18:00:00	0	11	0	2	0	0	0	0	1	0	0	1	6	2	10	9	0	0	7	13	0	0	5	22	0	0	1	15	5	0	18	0	8	0	2	0	0	6	24	0	17	0	11	10	0	0	1	0.1	4.40426
18:30:00	0	47	0	7	0	0	0	16	0	0	15	0	0	6	19	21	0	1	11	19	0	0	4	1	0	12	3	9	4	0	10	0	26	9	0	4	0	0	0	0	16	10	19	1	5	0	1	0.1	6.29787
19:00:00	0	0	0	12	0	13	0	10	0	0	6	22	0	39	6	12	0	0	10	57	1	0	4	9	0	29	10	6	2	0	25	0	19	43	0	22	0	0	40	0	6	9	14	11	0	0	7	0.1	9.44681
19:30:00	0	3	4	15	25	2	0	18	0	0	27	12	10	34	27	43	0	27	38	18	21	0	13	8	0	16	19	7	46	16	19	0	25	11	0	6	2	0	32	0	30	25	14	9	10	25	28	0.1	14.5745
20:00:00	24	3	44	24	23	11	7	19	18	29	20	33	37	37	42	17	0	42	65	20	32	19	17	8	6	28	16	10	13	43	26	5	25	34	0	15	9	1	12	0	13	23	6	20	25	16	33	0.1	20.6383
20:30:00	28	34	41	21	55	67	42	25	58	50	15	63	23	44	41	65	25	139	35	31	50	47	78	53	24	47	45	27	50	71	72	26	40	30	47	65	39	32	37	21	46	34	54	56	28	63	57		45.5532
21:00:00	0	0	7	0	0	0	0	2	2	0	5	1	3	0	0	4	0	17	0	0	1	7	20	12	0	8	7	0	7	9	3	0	0	34	21	130	27	23	0	27	81	28	22	0	40	9	7		12
21:30:00	0	3	17	0	0	0	0	0	0	0	0	0	0	0	0	0	0	11	0	0	0	0	0	1	0	0	0	0	0	0	0	0	0	4	0	2	38	0	0	19	0	22	1	0	0	0	0		2.51064
22:00:00	0	0	3	0	0	0	0	0	0	0	0	0	0	0	0	0	0	0	0	0	0	0	16	2	0	0	0	0	0	0	0	0	0	0	0	0	23	0	0	1	0	21	0	0	0	0	0		1.40426
22:30:00	0	0	0	0	0	0	0	0	0	0	0	0	0	0	0	0	0	0	0	0	0	0	2	1	0	0	29	0	0	0	0	0	0	0	0	0	14	0	0	2	17	0	0	0	0	0	0		1.38298
23:00:00	0	0	2	0	0	0	0	0	0	0	0	0	9	0	0	0	0	0	0	0	0	0	9	0	0	29	20	0	0	0	0	0	0	0	0	0	0	0	0	0	1	0	0	0	0	0	0		1.48936
23:30:00	0	0	46	0	0	0	0	0	0	0	0	1	0	0	0	0	0	0	6	0	0	0	14	0	0	8	0	71	0	0	0	0	0	0	0	0	0	0	3	0	43	0	34	0	0	0	0		4.80851
00:00:00	0	0	0	0	0	0	0	0	0	0	1	0	19	0	0	0	0	0	0	0	0	0	0	0	0	9	12	0	0	0	2	0	0	0	0	0	0	0	0	0	0	0	3	0	0	0	0		0.978723
00:30:00	0	0	0	0	0	0	0	0	0	0	5	2	4	0	0	0	0	0	29	0	0	0	2	13	0	7	0	0	0	0	0	0	0	0	0	0	0	0	0	0	0	0	0	0	0	0	0		1.31915
01:00:00	0	0	0	0	0	0	0	0	0	0	0	0	5	0	0	0	0	0	0	0	0	0	0	0	0	59	0	0	0	0	0	1	0	0	0	0	35	0	0	0	0	0	0	0	0	0	0		2.12766
01:30:00	0	0	0	0	0	0	0	0	0	0	0	0	6	0	0	0	0	0	0	0	0	0	2	0	0	10	0	0	0	0	0	14	0	0	0	0	21	0	0	0	0	0	0	0	0	0	0		1.12766
02:00:00	0	0	0	0	0	0	0	0	0	0	0	0	4	51	0	0	0	0	0	0	0	0	0	0	0	2	0	0	0	0	0	0	0	0	0	0	11	0	0	0	48	3	0	0	0	0	5		2.6383
02:30:00	0	0	0	0	0	0	0	0	0	0	9	42	1	13	0	0	0	0	0	0	0	0	0	0	0	1	0	0	0	0	0	0	0	0	0	0	0	0	6	0	27	17	0	0	0	0	0		2.46809
03:00:00	0	0	0	0	19	0	0	0	0	0	3	2	0	0	0	0	0	0	0	0	0	0	0	0	0	17	0	0	0	0	0	0	2	0	0	8	0	0	0	0	17	4	0	0	3	0	0		1.59574
03:30:00	0	0	0	0	0	0	0	0	0	0	16	6	9	6	0	0	0	0	0	0	0	0	0	0	0	0	0	0	0	0	0	0	0	1	0	38	0	0	11	0	70	0	0	0	1	0	10		3.57447
04:00:00	0	0	0	0	0	0	0	0	0	0	1	2	0	6	0	0	0	0	0	0	0	0	0	0	0	0	0	0	0	0	0	0	0	0	0	0	0	0	0	0	18	0	0	0	0	0	0		0.574468
04:30:00	0	0	0	0	0	0	0	0	0	0	0	0	0	0	0	0	0	0	9	0	0	0	0	0	0	0	0	0	0	0	0	0	0	1	0	0	0	0	0	0	69	0	0	0	0	0	1		1.70213
05:00:00	0	0	0	0	0	0	0	0	0	0	0	0	0	0	0	0	0	0	1	0	0	0	0	0	0	0	0	0	0	0	0	0	0	0	0	0	0	0	0	1	63	0	0	0	0	0	24		1.89362
05:30:00	0	0	0	2	0	0	4	0	0	13	0	0	0	0	0	0	0	0	13	0	0	0	0	0	0	0	0	0	0	0	0	0	0	0	0	0	0	1	0	0	77	1	0	0	0	0	19		2.76596
06:00:00	0	0	0	0	0	0	1	0	0	64	0	0	0	19	0	0	0	0	0	0	0	0	0	0	0	0	0	0	0	0	0	0	0	0	0	18	0	2	0	0	0	0	0	0	23	0	0		2.70213
06:30:00	0	0	4	19	0	0	0	0	0	25	0	0	4	53	0	1	0	0	0	0	0	57	0	0	0	0	6	0	0	0	0	0	0	0	0	11	3	0	0	0	0	0	0	0	35	0	2		4.68085
07:00:00	6	0	41	0	30	1	0	0	0	0	0	32	38	0	0	0	0	0	0	0	0	8	0	0	0	0	0	59	0	0	0	0	0	0	0	0	0	0	37	0	0	0	0	0	0	0	0		5.3617
07:30:00	42	0	0	0	0	0	0	1	0	0	0	0	0	0	0	0	0	0	0	0	0	0	0	0	0	0	0	32	0	0	0	0	0	0	0	0	0	0	0	0	50	0	0	0	0	1	0		2.68085
08:00:00	0	0	0	34	0	0	1	0	0	0	0	0	0	0	0	0	0	0	0	0	0	0	16	0	22	6	0	22	0	0	0	0	25	0	0	12	0	0	26	0	0	9	0	0	19	0	0		4.08511
08:30:00	23	30	48	40	19	76	31	33	45	26	54	37	31	63	37	53	52	52	43	39	70	35	40	41	60	48	45	37	43	37	38	50	59	31	22	40	52	41	119	24	47	64	41	42	38	41	54	0.1	44.4894
09:00:00	24	18	58	28	41	53	21	34	9	20	39	29	24	43	21	42	23	66	35	45	30	21	27	25	40	54	24	23	40	49	54	43	35	33	22	33	20	29	139	27	32	30	35	17	51	44	47	0.1	36.1064
09:30:00	9	19	18	12	9	43	12	12	30	13	22	25	19	39	17	36	33	54	35	45	28	23	34	19	68	33	24	24	32	33	35	55	40	12	7	30	17	39	52	11	40	24	16	22	26	78	26	0.1	28.7234
10:00:00	11	10	65	14	26	23	13	17	10	11	42	24	20	37	11	51	15	50	27	27	33	12	42	45	39	22	31	20	17	24	47	19	30	5	6	22	15	20	76	11	41	11	16	28	24	27	36	0.1	26.0213
10:30:00	22	5	14	20	2	19	2	19	0	15	21	12	7	27	19	42	0	41	17	29	34	6	24	6	19	14	18	12	22	19	28	5	21	11	6	19	19	8	54	7	20	7	13	26	12	37	19	0.1	17.4255
11:00:00	21	5	10	14	2	14	4	28	3	11	12	52	8	35	1	31	3	31	7	18	17	4	19	27	20	28	19	25	9	20	15	1	18	1	3	18	14	4	38	4	37	10	17	23	10	5	15	0.1	15.5532
11:30:00	0	1	7	2	0	26	0	16	0	5	5	16	11	41	4	21	0	36	9	16	0	6	28	34	13	14	7	18	9	19	6	2	27	20	3	8	0	5	23	6	49	24	54	22	7	12	19	0.1	13.8511
12:00:00	28	5	25	8	0	5	0	2	0	13	23	39	3	23	11	16	0	8	4	11	0	2	9	21	12	1	8	9	6	17	38	0	16	0	0	22	2	2	38	4	39	30	26	8	6	0	3	0.1	11.5532
12:30:00	5	0	4	5	15	0	0	1	0	0	16	12	2	12	7	20	0	40	10	1	0	6	2	34	32	7	4	6	3	2	4	0	10	0	0	15	0	5	20	1	26	21	33	19	18	0	13	0.1	9.17021
13:00:00	0	0	32	6	0	1	0	7	0	12	12	3	0	23	0	29	0	10	2	0	0	0	2	54	20	6	6	4	2	0	0	0	4	0	0	9	0	1	13	0	17	11	13	2	11	0	6	0.1	6.76596
13:30:00	0	0	4	3	0	0	0	0	0	1	1	0	0	2	0	31	0	31	0	0	0	24	2	21	4	0	0	3	4	0	0	0	0	0	0	3	0	1	15	2	7	19	0	0	25	0	7	0.1	4.46809
14:00:00	0	0	2	12	1	0	0	0	0	26	3	0	1	1	0	7	0	0	0	0	0	0	3	23	0	0	0	19	0	0	0	0	0	0	0	0	0	5	13	0	30	3	0	0	0	0	35	0.1	3.91489
14:30:00	0	0	1	1	0	0	0	0	1	0	3	0	0	4	14	8	103	15	0	0	0	0	3	0	0	19	23	21	0	0	0	0	0	0	0	3	0	10	5	0	1	0	0	0	0	0	0	0.1	5
15:00:00	30	4	2	0	0	0	0	4	0	1	0	0	0	5	3	3	0	9	0	0	0	27	0	0	0	127	0	25	0	0	0	0	0	0	0	9	46	10	5	0	1	0	0	0	0	0	0	0.1	6.61702
15:30:00	4	0	0	4	0	0	0	0	0	0	0	0	8	0	0	4	0	15	0	0	0	5	0	13	21	27	0	7	0	0	0	0	0	0	0	4	1	9	3	0	15	0	0	0	0	0	20	0.1	3.40426
16:00:00	1	0	1	0	0	0	0	0	0	0	11	0	0	0	2	7	34	42	0	0	0	18	4	3	15	47	2	66	0	0	0	0	0	0	0	0	0	4	24	0	19	0	0	0	0	1	0	0.1	6.40426
16:30:00	0	0	0	1	0	0	0	0	0	0	1	0	0	2	2	18	0	1	0	0	0	0	0	3	0	0	21	63	0	0	0	0	0	0	0	0	0	0	56	0	9	2	0	0	0	0	0	0.1	3.80851
17:00:00	0	0	0	2	0	0	0	0	0	0	0	0	0	0	0	18	0	0	1	0	0	0	0	25	0	0	7	56	0	0	0	0	0	0	0	0	0	0	5	0	16	3	0	0	0	0	0	0.1	2.82979
17:30:00	0	0	2	0	0	0	0	0	0	0	0	0	3	1	0	22	0	0	5	0	0	0	0	0	0	0	4	44	1	0	0	0	0	0	0	3	10	0	8	0	7	0	0	0	0	0	0	0.1	2.34043
18:00:00	8	0	1	15	0	0	0	0	0	0	6	0	9	0	19	11	0	0	50	0	0	0	0	0	0	0	7	23	60	0	0	0	0	0	0	10	1	0	12	0	29	3	0	0	0	0	1	0.1	5.6383
18:30:00	18	0	2	0	0	0	0	0	9	18	5	0	0	1	19	25	0	2	3	0	0	0	0	0	0	17	22	30	12	0	3	0	0	0	0	0	36	0	8	0	26	22	0	0	0	0	0	0.1	5.91489
19:00:00	1	1	1	20	2	2	1	2	2	0	33	0	9	11	1	35	0	47	2	0	0	10	12	1	0	44	28	16	21	0	14	0	2	22	0	7	85	0	20	0	26	13	0	0	0	0	0	0.1	10.4468
19:30:00	13	12	17	8	12	10	15	17	21	11	12	10	6	18	17	24	1	47	18	10	23	8	16	5	11	33	31	13	24	0	29	0	33	30	2	35	10	0	44	0	14	36	0	2	20	3	0	0.1	15.3404
20:00:00	26	19	19	29	27	30	12	31	38	40	22	20	29	25	54	47	42	36	18	19	49	10	23	11	30	16	32	21	38	22	31	14	22	93	0	10	4	0	42	0	28	36	7	7	33	18	26	0.1	25.6596
20:30:00	46	36	41	35	38	43	36	19	70	13	41	50	25	48	52	57	47	97	33	25	63	39	58	32	61	25	32	30	54	31	45	16	68	51	32	51	48	18	44	18	49	44	73	24	41	56	57		42.8085
21:00:00	2	9	30	1	0	0	120	0	41	0	1	0	0	31	25	42	0	111	7	6	97	0	27	32	0	25	1	1	2	10	27	41	4	58	0	14	46	0	9	11	4	9	36	3	36	1	4		19.6596
21:30:00	0	14	63	8	0	0	0	0	0	0	0	0	0	3	10	64	0	12	67	2	0	0	42	0	0	7	0	0	0	0	31	0	2	1	29	48	36	0	42	2	16	16	3	7	20	0	0		11.5957
22:00:00	0	71	0	4	0	0	0	0	0	0	1	0	0	0	0	44	0	0	0	1	0	33	47	0	0	11	33	0	0	2	44	1	3	14	0	54	27	0	51	14	1	0	36	0	44	5	0		11.5106
22:30:00	0	4	5	5	0	0	0	0	0	0	0	0	0	2	0	44	0	0	0	1	0	0	0	1	0	2	49	0	0	9	26	4	0	34	1	35	48	0	43	3	39	42	0	0	15	6	0		8.89362
23:00:00	0	0	0	0	0	0	0	0	0	33	1	0	0	0	0	0	0	0	0	20	0	0	59	0	0	0	0	0	0	2	8	35	0	3	0	7	0	0	27	11	19	0	1	13	0	3	0		5.14894
23:30:00	0	9	31	34	0	0	1	0	0	14	0	0	0	0	0	23	0	0	0	0	0	0	6	0	16	0	19	0	0	0	0	26	0	17	0	0	11	0	64	32	0	0	1	0	0	0	0		6.46809
00:00:00	0	0	0	12	0	0	0	0	0	0	0	0	0	0	0	0	0	0	0	1	2	0	30	0	60	1	0	0	0	2	0	0	0	25	0	0	6	0	55	0	0	0	31	0	0	0	0		4.78723
00:30:00	0	23	1	4	0	0	28	0	0	0	0	0	0	0	0	0	0	0	0	15	0	0	0	3	0	7	0	0	0	46	0	0	0	12	0	54	1	8	39	0	6	0	30	5	0	0	0		6
01:00:00	0	0	0	2	0	0	0	0	0	0	0	0	0	0	0	0	0	0	0	2	10	0	15	0	0	0	0	1	0	0	0	3	0	2	0	1	6	0	28	0	0	4	0	6	0	0	0		1.70213
01:30:00	0	0	0	17	0	0	0	0	0	0	0	0	0	0	0	0	0	0	0	1	0	0	0	3	0	0	0	33	0	8	0	0	0	20	0	22	0	0	23	0	0	0	0	35	0	0	0		3.44681
02:00:00	0	0	0	10	25	0	0	0	0	0	0	0	0	0	0	0	0	0	0	44	5	0	0	5	0	0	38	142	0	33	0	0	0	39	19	0	13	0	0	0	0	0	0	1	0	0	0		7.95745
02:30:00	0	0	0	3	0	0	0	0	0	0	1	0	0	0	0	15	0	0	0	0	61	0	0	16	0	0	6	104	12	0	0	0	0	69	0	0	12	0	1	0	0	0	10	27	0	0	0		7.17021
03:00:00	0	0	0	0	0	0	0	0	0	0	0	0	0	1	0	41	0	0	2	0	2	0	0	2	0	0	0	8	0	0	0	0	0	0	0	0	3	0	0	3	0	0	0	2	0	0	0		1.3617
03:30:00	0	0	1	0	0	0	0	0	0	0	10	0	0	0	0	2	0	0	3	15	11	0	0	0	0	0	38	15	0	1	0	6	0	1	0	37	0	0	1	3	0	0	1	62	0	0	0		4.40426
04:00:00	0	0	0	12	0	0	0	0	0	0	10	0	0	1	0	1	0	0	0	8	47	0	0	0	0	0	25	14	0	0	0	0	0	0	0	46	4	0	2	4	0	0	1	19	0	0	0		4.12766
04:30:00	0	0	0	5	0	0	0	0	0	0	0	0	0	0	0	0	0	0	0	4	0	0	0	0	11	0	0	0	0	3	0	28	0	0	0	0	3	0	1	5	0	0	9	0	0	0	0		1.46809
05:00:00	0	0	0	16	0	0	0	0	0	0	0	0	0	0	0	0	0	0	0	11	0	0	0	0	0	0	0	0	0	0	0	0	0	0	0	0	7	0	1	2	0	0	0	0	0	0	0		0.787234
05:30:00	38	0	1	18	0	0	0	0	0	0	0	0	0	7	0	0	0	0	0	0	0	0	0	0	0	0	0	41	0	0	0	7	0	0	0	0	0	0	17	0	19	0	0	0	0	0	0		3.14894
06:00:00	0	0	1	13	0	0	0	0	0	0	0	0	0	57	0	0	0	0	0	14	28	2	0	1	0	0	0	0	0	5	0	10	0	0	0	9	0	0	54	0	14	58	0	1	0	0	0		5.68085
06:30:00	0	25	0	6	8	2	0	0	0	22	5	0	0	33	0	3	0	0	0	0	1	0	0	3	0	0	56	4	0	5	0	0	0	0	0	35	0	0	12	0	0	2	0	21	31	0	0		5.82979
07:00:00	0	0	0	0	12	0	0	0	0	36	0	0	34	134	0	45	0	0	0	57	18	0	0	0	0	0	42	11	0	0	0	11	0	0	0	0	2	0	43	0	18	0	0	1	19	0	0		10.2766
07:30:00	0	0	0	37	0	1	1	0	0	0	29	0	9	46	0	9	0	0	0	1	0	0	0	27	0	0	11	21	0	0	0	4	0	0	0	59	0	0	0	0	41	0	34	43	0	0	0		7.93617
08:00:00	0	0	1	3	0	0	0	7	0	0	15	4	3	0	0	7	2	0	1	14	12	0	0	0	44	0	0	4	0	5	0	21	53	0	0	2	0	0	0	0	1	0	15	7	0	0	0		4.70213
	42	44	34	69	25	54	33	43	34	43	67	30	31	46	35	99	33	64	46	55	68	33	53	41	48	57	35	47	41	57	45	55	34	39	6	54	71	29	56	20	38	42	35	50	33	34	29
	18	32	27	43	14	39	30	33	44	30	51	19	17	32	25	51	33	52	40	52	39	19	50	34	52	37	25	25	28	36	44	36	38	51	27	29	15	27	53	14	23	25	44	24	49	55	29
	21	20	36	25	8	24	17	26	33	17	23	27	7	30	11	39	25	41	16	25	31	12	36	20	20	22	27	38	21	22	27	31	31	30	42	36	15	17	33	15	26	31	9	18	41	24	13
	14	11	10	18	17	30	13	23	84	30	40	25	11	29	13	19	34	41	45	18	32	18	33	18	37	14	24	38	30	23	25	33	26	13	13	25	29	12	36	17	33	24	33	28	27	20	18
	19	16	11	12	8	25	9	11	15	14	21	15	16	41	8	30	34	49	10	26	6	2	24	29	22	31	13	18	25	7	4	20	24	22	23	20	13	13	36	7	26	27	17	27	42	21	22
	7	9	10	28	5	17	1	20	1	9	19	5	4	48	17	16	15	31	5	15	4	0	29	6	22	7	11	25	15	9	0	14	44	23	5	12	8	25	15	8	28	18	22	30	12	22	14
	15	16	4	13	4	6	17	7	0	4	19	16	1	55	2	30	14	32	4	19	10	6	21	15	19	6	21	15	26	12	9	4	20	6	0	32	12	13	54	2	21	17	0	26	21	12	2
	0	9	4	6	0	1	0	17	0	13	14	17	0	44	0	10	2	29	2	15	0	1	7	31	4	10	10	8	13	0	14	2	23	16	1	21	76	4	27	4	18	18	0	8	13	14	3
	24	12	12	8	0	7	2	4	0	7	24	6	0	23	0	9	0	22	0	12	0	11	3	2	0	4	3	8	24	7	6	0	12	3	0	0	17	2	6	2	17	12	0	17	7	1	0
	9	5	0	5	3	1	0	5	0	6	10	2	0	15	0	2	0	3	0	0	0	8	2	0	0	6	9	9	18	0	1	18	2	4	0	6	43	0	12	2	12	6	0	2	5	0	5
	0	2	5	1	0	0	0	8	0	3	15	0	0	21	3	2	0	0	0	0	0	3	0	0	3	13	10	2	6	0	1	0	0	0	0	5	30	0	19	0	9	2	0	0	18	0	0
	0	0	2	4	0	0	0	0	0	1	22	2	0	11	20	0	0	0	0	0	0	0	0	0	1	0	20	31	3	0	0	0	0	0	0	0	34	0	2	0	4	0	0	0	57	0	0
	0	0	19	2	0	0	0	0	0	7	1	11	10	0	19	0	64	0	0	0	8	1	1	0	0	9	2	43	2	0	0	1	0	0	0	1	71	0	0	0	6	0	0	0	31	0	2
	25	49	2	4	0	0	0	0	0	4	11	0	3	2	15	51	1	0	0	0	0	14	27	0	0	37	8	76	0	0	0	0	0	0	1	8	21	6	0	0	11	0	1	1	20	0	1
	12	0	2	1	0	0	0	9	12	0	6	3	0	0	14	81	1	0	0	0	0	25	0	49	11	81	32	7	0	0	0	0	0	0	6	6	5	0	0	1	7	1	0	0	0	0	0
	6	0	2	0	0	0	0	0	0	6	4	0	0	3	17	25	0	0	0	0	6	4	0	1	26	0	7	3	0	0	0	0	14	0	7	16	7	7	17	0	14	0	0	1	0	0	1
	24	0	12	1	1	0	0	27	13	0	1	0	5	2	16	16	0	0	0	0	85	4	0	0	0	0	8	31	9	0	0	0	10	0	1	55	42	0	30	0	5	0	0	0	0	2	0
	17	0	21	0	21	0	0	24	0	37	6	0	8	3	20	1	38	18	24	21	16	28	34	27	78	51	40	18	16	21	16	29	48	33	1	4	55	8	64	0	33	23	10	20	19	16	13
	9	0	0	14	0	0	0	4	0	7	24	6	0	3	34	20	0	2	0	13	0	0	0	0	19	7	11	17	0	0	0	0	26	0	0	8	0	7	0	0	26	0	3	3	0	0	60
	5	0	5	6	2	3	0	0	0	3	13	0	18	0	35	13	7	2	4	29	0	0	0	0	0	12	13	16	3	0	0	0	0	0	0	0	0	0	0	0	5	1	0	2	0	0	1
	13	0	0	26	8	3	0	5	0	0	20	9	0	5	17	17	46	36	10	24	27	3	14	12	49	44	33	14	40	12	0	7	26	6	7	36	29	0	22	4	30	24	21	25	22	0	64
	14	3	27	7	12	36	0	12	0	0	28	11	8	35	22	33	3	43	18	8	0	0	5	0	0	26	27	8	8	0	0	0	21	4	0	10	0	0	2	0	27	29	8	12	0	0	18
	14	1	25	16	19	40	2	27	23	12	27	14	13	22	18	35	33	25	24	33	21	0	8	14	22	18	22	10	19	0	23	8	36	8	0	15	84	3	44	0	23	43	19	8	32	0	28
	14	21	31	15	20	23	18	35	40	16	36	19	25	34	38	46	26	32	15	18	35	2	25	33	7	34	25	19	30	26	29	19	26	37	1	16	14	0	68	0	27	22	43	16	78	2	24
	38	49	23	39	24	62	54	56	58	5	25	45	33	57	16	46	20	47	34	38	59	51	34	48	21	87	40	23	36	67	32	28	49	48	77	50	63	54	33	13	27	38	45	19	35	52	47
	0	49	6	96	0	133	3	81	28	0	9	8	0	28	42	7	0	107	0	38	1	0	21	0	0	97	6	0	12	59	3	10	71	159	17	60	6	3	8	15	0	69	38	17	42	22	12
	0	0	0	37	0	52	0	30	0	0	40	0	0	7	26	29	0	34	0	0	0	0	73	0	0	0	0	0	16	0	0	0	15	0	4	32	0	2	36	20	0	23	6	5	5	2	6
	0	6	0	49	0	0	0	24	0	0	0	0	0	0	0	31	0	1	0	43	0	0	50	0	0	0	0	1	0	0	0	0	0	0	1	18	1	2	10	19	0	5	0	2	0	12	4
	0	0	0	42	0	0	0	0	0	4	0	0	0	20	0	17	0	36	0	7	1	0	7	0	0	0	0	10	0	0	5	0	0	0	2	0	0	11	14	16	20	0	32	2	0	29	2
	0	0	8	0	0	17	16	0	0	3	4	0	0	22	0	101	0	4	0	44	0	0	7	0	0	0	0	9	0	0	18	0	17	0	2	0	0	0	23	16	0	0	0	0	0	26	47
	0	0	0	0	0	0	26	0	0	64	12	0	0	0	0	23	0	34	0	83	6	0	0	0	0	0	0	0	0	0	23	22	6	0	0	0	0	2	19	36	25	0	0	0	0	1	0
	0	2	0	0	0	0	0	44	0	0	2	0	0	0	0	39	0	59	0	0	4	0	0	0	0	0	38	1	17	0	12	0	0	0	1	13	1	0	68	1	28	3	0	0	0	1	94
	0	0	0	0	0	0	0	54	0	0	11	0	0	14	0	51	0	24	0	0	9	0	0	12	0	0	69	0	0	0	0	0	0	0	4	2	0	4	19	10	39	22	0	0	0	29	1
	0	0	0	8	0	0	0	40	0	0	0	0	0	10	0	68	0	0	0	0	6	0	11	16	0	0	26	2	4	0	0	1	0	0	0	0	0	0	38	0	4	3	0	0	0	0	14
	0	0	0	0	0	0	0	0	0	42	0	0	0	1	0	0	0	91	0	0	13	2	0	19	0	0	23	2	0	0	0	15	0	26	0	2	0	0	13	0	67	8	0	0	0	0	0
	0	0	0	23	13	0	0	8	0	47	0	0	0	0	0	0	0	13	0	4	0	0	0	0	0	0	9	0	11	0	3	0	0	65	2	7	0	0	5	0	0	5	0	0	0	0	1
	0	0	0	0	11	0	80	0	0	0	0	0	15	0	0	0	0	13	0	0	1	0	2	0	0	0	0	0	0	0	0	0	0	58	3	0	0	0	3	0	0	1	0	0	0	0	0
	0	0	0	13	0	0	0	0	0	0	0	0	0	0	0	0	1	31	0	0	0	4	0	0	0	0	0	130	0	0	1	0	0	3	6	4	1	0	0	0	28	0	0	0	0	0	0
	0	0	0	1	0	0	40	0	0	0	0	0	0	0	0	0	0	36	0	0	0	4	0	0	0	0	5	119	0	0	0	0	0	79	0	0	0	0	0	0	0	21	0	0	0	0	0
	0	20	0	4	0	0	0	0	0	0	12	0	0	0	0	14	1	12	0	1	0	0	0	0	1	0	0	59	8	0	0	0	0	35	4	0	0	0	0	0	0	0	0	0	0	0	0
	0	0	11	0	0	0	0	0	0	43	14	0	0	2	0	96	3	9	0	0	0	0	0	0	0	0	0	0	0	0	39	1	0	9	3	51	0	0	2	0	0	0	2	0	0	0	0
	0	0	0	1	0	0	0	0	0	2	12	0	0	1	0	19	0	26	0	0	0	0	0	0	0	0	0	0	42	0	6	0	0	0	2	33	0	0	65	0	0	0	0	0	0	9	1
	0	0	0	41	0	0	0	0	0	0	49	0	0	5	0	0	0	7	0	0	0	0	0	0	0	40	0	4	1	1	31	0	0	0	17	39	1	0	0	0	0	0	0	0	0	7	0
	0	0	6	0	0	0	0	0	0	0	38	0	0	42	5	0	0	4	0	0	0	0	0	1	0	3	0	29	12	0	2	0	0	66	8	9	0	0	0	0	0	0	17	0	54	47	0
	0	24	0	0	0	0	0	0	0	0	0	0	0	16	8	0	0	12	0	0	0	0	0	0	0	14	2	0	5	0	0	0	0	29	3	0	0	0	0	0	15	0	0	0	0	0	0
	0	11	0	0	0	0	0	0	0	0	27	0	2	8	7	51	0	46	0	0	0	0	0	0	0	1	36	0	13	0	8	0	0	0	1	2	0	0	0	0	0	18	8	0	5	0	0
	0	18	0	25	0	0	0	5	0	0	5	18	0	13	0	0	0	0	9	0	0	2	0	3	0	16	1	1	22	0	12	0	0	0	2	0	10	0	87	0	19	0	17	0	0	0	48
	0	67	0	16	0	0	2	29	0	0	6	0	0	0	0	0	0	0	11	0	0	0	28	1	8	1	0	0	0	0	49	0	0	0	0	49	0	0	14	0	0	0	0	11	19	15	18
	44	41	64	42	31	54	45	28	42	31	53	27	24	41	31	54	36	62	44	48	42	41	51	53	74	71	32	38	58	45	36	48	45	36	39	57	46	31	39	28	39	64	20	50	54	41	45
	22	29	30	33	32	35	26	40	24	12	36	31	11	34	18	38	52	52	29	37	34	31	31	19	34	31	20	25	41	24	25	34	35	30	27	21	33	20	47	22	33	62	0	35	61	23	48
	26	19	34	23	10	24	19	25	19	39	30	45	15	28	18	43	48	49	53	35	59	24	26	17	42	16	22	18	30	40	37	31	41	32	21	27	31	27	50	21	15	9	0	57	43	22	29
	24	28	11	19	13	18	23	23	18	11	36	17	9	49	22	46	1	45	15	27	24	27	28	20	22	29	16	43	19	14	25	39	14	32	24	29	16	20	32	22	42	30	21	31	33	37	23
	11	18	18	8	15	20	21	16	9	20	52	17	13	56	31	35	0	35	26	60	23	22	21	18	17	15	21	16	22	8	14	31	40	24	9	20	26	13	71	17	52	19	40	36	38	18	4
	14	14	23	11	12	12	15	13	1	10	23	14	12	53	13	33	0	37	66	26	5	7	19	58	21	12	8	11	20	7	7	11	24	13	5	21	34	12	37	8	16	24	48	15	22	30	8
	28	22	43	12	6	12	0	16	0	0	14	14	7	46	13	15	0	22	30	10	2	4	9	23	32	14	12	11	23	0	22
	37	18	25	12	3	1	7	10	0	15	16	6	6	66	7	32	0	6	14	8	0	4	9	16	46	9	6	7	21	0	5
	10	9	6	7	0	9	1	0	15	14	15	17	2	41	18	26	0	0	8	10	0	2	2	8	15	1	2	4	19	8	2
	6	4	11	3	0	6	0	0	0	7	2	2	6	37	19	0	0	0	0	4	0	2	0	9	9	0	4	15	23	0	0
	18	5	4	4	0	0	0	0	0	0	21	25	10	23	22	2	0	0	0	0	0	0	3	11	17	8	2	6	15	0	0
	27	0	0	2	0	0	0	0	0	0	8	2	6	32	22	0	0	0	0	0	0	0	2	1	4	0	2	32	14	0	0
	0	0	0	0	0	0	0	0	0	0	6	0	15	42	17	22	0	0	0	0	0	0	0	2	0	0	49	56	9	0	0
	4	0	21	0	0	0	0	40	0	0	0	0	6	21	19	11	0	0	0	0	0	0	0	1	0	50	9	61	0	0	1
	16	0	1	0	0	0	0	5	6	0	0	0	1	3	22	36	0	0	0	1	0	0	6	1	0	15	45	41	0	0	0
	0	0	0	0	0	0	0	0	0	0	0	0	0	16	2	15	44	0	0	0	0	0	0	0	0	0	5	27	13	0	0
	12	0	16	2	0	0	2	0	0	0	5	0	0	5	3	0	30	1	13	22	1	0	19	31	49	7	23	30	17	2	0
	0	0	0	2	0	0	1	0	0	0	0	0	0	3	1	1	5	0	0	0	0	0	2	40	36	3	10	19	2	0	1
																	0	15	0	0	0	1	0	6	13	0	3	11	5	0	29
																	0	20	0	0	0	0	2	0	10	0	26	9	6	0	4
																	0	44	0	12	0	0	9	6	9	33	31	18	30	0	13
																	7	56	1	6	1	0	41	9	25	3	29	12	33	0	23
																	31	45	15	26	2	4	11	36	39	15	23	27	14	29	20
																	27	29	40	15	43	8	25	34	45	28	37	16	11	53	23
[truncated: 249 more columns]

## Sheet: Fig 4 S4 B (HFD ATG7 RNAi)
FED (ATG7 RNAi~BD-AD-AKHR)	M30-11.23													M5-11.21														M6-11.21													M7-11.21
20:30:00	28	48	34	53	25	29	37	59	24	66	31	51	14	46	85	29	13	22	0	35	42	11	43	15	10	39	12	0	33	43	54	14	18	13	42	23	4	20	23	4	12	31	31	38	29	22	41	26	23
21:00:00	14	0	51	43	31	9	2	35	0	44	5	4	0	20	35	17	0	2	0	11	25	0	5	0	29	0	0	0	0	0	22	0	0	0	6	0	0	0	0	0	0	90	0	0	0	0	54	42	3
21:30:00	5	0	0	4	0	15	0	0	0	0	0	0	0	0	0	0	0	24	0	14	0	0	0	0	3	0	0	0	0	0	14	0	6	0	1	0	0	3	0	0	20	0	0	0	0	0	8	10	0
22:00:00	9	0	0	0	0	0	0	8	0	0	0	0	0	0	0	0	0	53	0	23	0	0	0	0	7	0	0	0	0	0	0	0	0	0	0	1	2	0	0	0	5	21	0	0	0	0	0	6	0
22:30:00	0	0	0	0	0	0	0	0	0	0	0	0	0	0	0	0	0	20	0	7	0	0	0	6	0	0	0	1	1	0	0	0	1	0	0	5	0	0	0	1	5	0	0	0	0	0	11	5	0
23:00:00	0	0	0	2	0	0	0	0	0	0	0	2	0	0	0	0	0	11	0	23	14	21	28	5	0	0	0	0	0	0	0	0	0	0	0	10	0	0	2	0	0	0	0	0	0	0	4	16	0
23:30:00	0	0	0	2	0	0	0	0	0	0	0	0	0	0	0	0	0	0	0	0	11	0	10	0	9	0	0	0	0	0	0	0	0	0	0	0	0	0	0	0	0	0	0	0	0	0	6	3	0
00:00:00	0	0	54	1	0	0	0	0	0	0	0	0	0	0	0	0	0	0	0	0	5	0	34	19	20	0	0	0	17	0	0	0	0	0	0	0	0	0	0	0	0	0	1	0	2	0	0	0	0
00:30:00	0	0	12	31	0	0	0	0	0	0	0	0	0	0	0	0	0	8	0	2	0	0	48	22	6	0	0	0	2	1	3	0	44	0	0	6	0	0	0	0	0	0	0	0	0	0	0	0	0
01:00:00	0	0	0	28	0	0	0	0	24	0	0	19	0	0	0	16	0	16	0	0	0	0	1	1	0	0	0	0	0	0	0	0	0	0	0	0	0	0	0	0	0	0	0	0	0	0	0	0	0
01:30:00	0	0	0	0	0	0	0	0	26	0	0	0	0	0	0	53	0	0	0	0	37	0	0	4	1	0	0	0	0	0	20	0	0	0	0	0	0	0	0	13	0	0	0	0	0	0	0	0	0
02:00:00	0	0	0	52	0	0	0	24	0	0	0	0	0	10	0	0	0	0	0	0	0	0	0	21	0	0	0	0	19	0	19	0	0	0	20	23	0	0	0	2	0	0	0	0	0	0	0	4	0
02:30:00	14	0	0	0	0	0	0	4	0	2	0	0	0	44	0	0	0	0	0	0	0	0	0	33	0	0	0	0	0	6	0	0	0	0	32	0	0	0	0	0	0	0	0	0	1	0	3	1	1
03:00:00	0	0	0	0	0	0	0	11	0	0	0	0	0	5	0	0	0	0	0	0	0	0	33	4	0	0	0	0	0	0	0	0	0	0	0	1	0	1	0	3	0	0	0	1	60	0	0	13	0
03:30:00	0	0	21	0	0	3	0	10	0	0	4	0	0	0	0	0	0	0	0	0	0	0	19	13	0	0	0	0	0	0	14	0	0	0	0	13	0	0	0	40	0	0	0	0	17	0	0	63	0
04:00:00	0	0	27	13	0	0	0	48	0	0	0	0	0	0	0	0	0	0	0	0	3	0	0	0	0	14	0	0	0	0	0	0	0	0	0	23	0	0	58	0	0	0	1	0	1	0	0	32	0
04:30:00	0	0	0	20	0	0	0	29	0	0	0	0	0	0	0	0	0	0	0	0	35	27	35	0	7	0	0	0	0	0	0	0	0	0	0	4	0	0	0	0	0	0	0	0	14	0	0	0	0
05:00:00	0	0	0	0	0	0	0	20	0	25	0	21	0	0	0	0	0	0	0	0	0	0	0	0	25	0	0	0	0	0	0	0	12	0	0	4	18	0	0	0	2	0	54	0	36	0	1	0	0
05:30:00	0	0	0	0	2	0	0	0	0	26	0	70	0	0	0	0	0	0	0	13	0	10	0	0	0	0	0	0	0	0	0	0	0	0	0	0	1	0	0	9	0	0	1	0	0	0	39	1	0
06:00:00	0	0	0	0	2	0	0	0	8	0	0	0	0	13	0	0	0	1	0	39	0	7	0	0	0	0	0	0	0	0	0	0	0	0	0	0	42	0	0	0	1	0	21	0	42	0	0	0	0
06:30:00	7	0	0	0	0	0	0	0	56	0	0	0	0	16	0	0	12	1	0	0	0	3	36	0	0	0	0	0	0	0	0	0	0	0	0	0	6	0	0	0	0	0	69	0	0	0	0	0	0
07:00:00	0	0	0	11	6	0	0	0	0	0	0	0	0	0	0	0	9	0	11	0	3	12	7	0	0	0	0	0	0	0	0	0	0	0	0	2	53	0	0	0	0	0	1	0	0	1	0	3	0
07:30:00	0	0	3	0	77	7	0	0	0	0	0	27	0	0	0	0	0	0	4	0	25	1	0	0	0	0	3	0	0	0	15	0	0	0	0	22	22	0	0	0	0	0	1	0	1	1	13	0	0
08:00:00	5	19	0	25	3	0	0	54	0	0	23	0	25	0	0	1	0	17	0	0	9	0	3	0	0	0	43	6	0	0	0	0	0	0	8	0	16	0	11	0	1	18	0	0	0	0	5	17	0
08:30:00	22	38	38	61	12	14	24	44	23	28	10	18	34	20	31	23	20	17	8	36	0	41	52	41	7	5	160	19	15	32	14	26	20	30	71	57	51	26	73	22	53	68	43	36	47	18	41	41	27
09:00:00	33	64	24	71	16	5	26	27	25	39	15	34	12	16	31	27	22	9	4	29	21	52	100	24	0	21	14	20	4	11	4	42	25	19	13	35	9	16	22	3	50	34	53	35	53	24	8	25	29
09:30:00	15	67	26	48	22	8	24	39	18	22	3	16	25	16	39	10	10	10	0	25	24	14	18	16	6	15	15	21	0	14	21	19	10	0	10	17	15	3	10	10	15	24	30	30	50	23	27	22	34
10:00:00	19	49	16	23	2	19	10	54	14	22	5	46	16	25	17	27	2	16	40	4	5	18	7	25	13	7	8	2	0	6	6	14	14	10	29	14	7	8	17	5	0	44	35	22	18	15	12	5	12
10:30:00	13	28	5	31	12	0	8	82	12	39	2	14	9	14	12	2	8	27	0	0	0	6	13	18	14	3	0	0	0	22	4	11	14	7	23	8	2	8	6	7	0	11	21	19	37	2	15	13	37
11:00:00	7	28	0	19	0	2	11	31	7	17	3	31	3	9	25	0	6	26	0	7	0	12	2	31	4	5	16	0	0	22	10	3	0	0	9	12	5	0	4	0	4	16	31	10	25	0	0	11	0
11:30:00	10	19	39	28	0	6	14	40	8	20	3	5	12	9	7	29	0	46	0	2	16	10	5	26	12	12	7	0	0	15	0	0	3	8	9	8	5	1	5	0	0	0	17	7	21	1	0	5	0
12:00:00	9	25	0	16	0	0	4	23	5	2	0	10	0	6	18	0	0	0	0	0	0	9	0	20	3	17	0	0	0	1	0	2	0	0	23	9	0	1	7	0	0	5	34	4	14	0	18	20	0
12:30:00	2	18	0	6	0	0	0	8	0	6	0	25	5	14	4	0	0	5	0	0	14	2	0	9	6	8	0	0	0	8	0	1	0	0	12	0	1	0	6	0	2	3	14	18	0	0	0	4	0
13:00:00	0	20	0	0	0	0	12	18	0	7	0	4	4	0	0	0	0	21	0	0	0	4	0	13	1	0	0	0	0	1	25	1	4	0	0	2	3	0	11	0	5	0	0	0	1	0	0	5	0
13:30:00	13	1	0	7	0	0	0	29	6	0	0	0	0	5	0	7	4	0	0	0	0	0	0	1	27	0	0	0	0	4	4	0	0	0	13	0	8	0	0	0	1	15	0	0	2	1	0	3	0
14:00:00	4	15	0	17	0	0	1	16	0	0	0	0	0	3	0	0	0	8	0	0	0	0	0	6	0	0	0	0	0	0	0	0	0	0	10	2	3	0	0	0	3	0	3	3	10	1	6	0	0
14:30:00	0	0	0	0	0	0	0	29	0	0	0	0	3	0	0	0	0	10	0	0	0	0	0	0	3	0	0	0	0	0	0	0	0	0	0	1	0	0	0	0	0	0	0	0	3	21	0	1	24
15:00:00	0	0	0	0	0	0	0	0	0	0	0	0	0	1	0	0	0	1	0	9	0	0	0	0	15	0	0	0	0	0	0	0	0	0	13	7	0	0	0	0	3	0	2	0	11	0	1	0	7
15:30:00	0	0	0	29	0	0	0	0	0	0	0	0	0	0	0	0	4	8	0	2	0	0	2	1	24	0	0	0	0	0	0	0	0	0	0	0	0	0	0	0	4	0	0	0	0	3	0	23	0
16:00:00	0	4	0	0	0	0	0	26	0	0	0	0	0	0	0	0	8	6	0	1	0	0	34	0	8	0	0	17	0	25	0	0	0	0	0	15	0	0	0	0	0	0	0	0	1	0	0	0	0
16:30:00	0	2	0	20	0	0	0	3	0	0	0	12	0	23	0	0	3	2	0	8	0	0	0	0	49	0	0	3	0	39	0	0	0	0	0	3	0	0	0	0	4	1	0	0	11	2	0	1	0
17:00:00	18	0	0	8	0	0	0	3	0	0	0	2	2	0	5	0	4	2	0	0	0	0	2	1	6	0	0	0	0	24	0	0	0	0	0	6	4	0	0	0	0	0	0	0	13	2	0	0	0
17:30:00	5	11	19	22	16	2	16	4	0	0	0	3	15	0	0	0	6	0	0	0	0	35	15	0	12	0	0	0	0	20	0	0	0	55	5	0	19	0	0	0	0	0	1	0	0	0	0	0	0
18:00:00	3	3	16	61	0	7	18	16	16	0	0	9	32	5	0	0	0	7	0	0	0	3	0	0	23	0	0	2	0	8	0	0	0	16	0	0	0	0	0	0	1	0	3	0	0	0	0	0	0
18:30:00	0	14	6	2	0	0	1	24	11	46	0	6	0	7	0	0	10	14	0	0	0	3	0	1	21	0	0	0	0	27	0	0	0	0	6	0	7	0	0	0	1	12	1	2	2	0	0	0	0
19:00:00	0	10	0	5	0	6	0	28	0	5	0	6	5	4	0	0	6	7	0	0	0	0	17	6	27	0	0	0	0	17	0	78	0	69	22	21	0	0	10	7	0	7	7	13	5	0	0	0	4
19:30:00	8	16	28	29	0	2	10	28	8	0	0	14	8	7	0	0	5	6	6	1	20	29	18	10	4	0	0	0	4	41	0	1	0	11	3	2	6	0	43	4	0	34	10	7	7	6	0	34	4
20:00:00	19	22	24	34	16	2	13	17	13	7	10	20	12	23	8	0	19	8	15	23	22	24	22	6		0	18	0	9	6	22	23	19	0	7	11	18	9	20	18	0	20	18	23	29	2	0	14	26
20:30:00	27	31	59	48	41	23	29	55	35	54	36	38	17	39	53	44	65	38	23	35	55	57	47	41		32	48	34	75	15	35	23	27	36	55	74	36	67	22	28	3	67	34	46	43	55	58	27	46
21:00:00	0	8	13	28	32	0	0	31	46	50	5	7	5	0	4	38	0	49	0	6	34	1	0	0		0	0	0	2	0	9	0	0	0	0	4	0	0	0	5	0	3	0	0	2	1	66	19	3
21:30:00	0	0	0	13	0	0	0	25	0	25	0	0	12	0	0	4	0	2	10	19	57	0	0	0		0	0	0	1	0	0	0	0	0	43	1	0	0	0	0	0	0	0	0	0	0	29	0	0
22:00:00	0	0	0	0	0	0	0	27	0	0	0	0	4	0	0	0	0	3	0	0	0	0	0	0		0	0	0	0	0	0	0	0	0	11	0	0	0	0	0	2	0	0	0	0	0	0	0	0
22:30:00	0	0	0	21	0	0	0	0	0	0	0	0	0	0	0	0	0	0	33	0	32	0	0	0		0	0	0	10	0	0	0	1	0	37	0	0	0	0	0	0	0	0	0	0	0	0	0	0
23:00:00	0	0	4	3	0	0	0	0	0	0	0	2	14	0	0	0	0	0	12	0	34	0	0	0		0	0	0	11	0	0	0	0	0	0	0	0	0	0	13	0	0	0	0	0	0	0	0	0
23:30:00	0	0	14	2	0	0	0	0	0	0	1	0	7	0	0	0	0	3	21	0	35	0	0	36		0	0	0	3	0	0	0	0	0	0	0	0	0	0	0	0	0	0	0	1	0	0	0	0
00:00:00	1	0	0	5	0	6	0	29	0	0	0	0	15	0	0	0	0	17	0	0	31	0	0	21		0	0	0	39	0	0	0	0	0	0	0	0	10	0	0	0	0	0	0	0	0	21	0	0
00:30:00	0	0	0	4	0	0	0	0	0	0	0	0	2	0	0	0	0	6	0	0	23	0	0	0		0	0	0	0	0	0	0	0	0	0	0	0	0	0	0	0	0	0	1	11	0	0	0	0
01:00:00	1	0	1	85	0	0	0	0	0	0	0	2	3	27	0	0	4	3	0	0	0	0	47	0		3	0	0	0	0	0	0	0	0	0	0	0	0	0	0	4	0	0	1	4	0	36	0	0
01:30:00	0	0	0	0	0	0	0	0	0	0	0	0	3	10	0	1	44	18	0	21	0	0	0	0		43	0	0	0	0	0	0	0	0	0	0	0	11	0	6	0	0	0	6	24	0	10	0	0
02:00:00	0	0	0	21	0	0	0	0	0	0	0	0	2	0	49	0	0	2	0	0	0	0	0	0		0	0	0	0	0	0	0	0	0	0	0	24	93	0	18	0	0	0	0	114	0	0	7	0
02:30:00	0	0	0	0	0	2	0	0	0	0	0	17	0	0	0	0	0	5	2	0	17	0	0	0		25	0	0	0	0	0	0	9	0	0	0	1	30	0	0	0	1	0	31	53	0	5	35	0
03:00:00	0	0	33	0	0	0	0	0	0	0	0	12	18	0	1	0	0	3	0	0	26	0	0	0		0	0	0	0	0	0	0	21	0	0	0	0	0	0	16	0	0	1	3	10	0	0	31	0
03:30:00	0	0	59	0	0	0	0	0	0	0	0	0	0	39	0	38	0	0	0	0	0	0	0	0		0	0	0	73	0	0	0	0	0	0	0	0	0	0	0	1	2	0	8	31	0	0	70	0
04:00:00	0	0	15	0	0	0	0	0	0	0	0	0	0	0	0	0	0	4	0	0	0	0	0	0		24	0	0	1	1	0	0	0	0	0	0	0	1	5	0	0	0	0	6	15	0	0	8	0
04:30:00	0	0	44	24	0	0	0	0	0	0	0	0	0	0	0	0	0	2	0	0	0	0	0	0		3	0	0	0	0	0	0	0	0	91	74	0	0	0	0	0	0	0	3	0	0	0	20	0
05:00:00	0	0	0	29	0	0	0	0	28	0	0	19	0	0	0	0	18	11	0	0	16	0	0	0		0	0	0	0	1	28	0	0	0	0	0	0	0	0	0	0	21	0	54	2	0	0	4	0
05:30:00	0	0	0	0	0	0	0	0	25	0	0	0	6	0	24	0	0	22	0	0	32	33	16	0		0	0	29	0	0	0	0	0	46	0	0	0	1	0	0	2	20	0	0	0	0	15	0	0
06:00:00	0	0	0	0	0	0	0	0	0	0	0	0	0	0	0	0	0	3	0	0	0	7	43	24		24	0	0	0	18	0	0	0	0	0	0	0	0	0	0	0	0	0	0	4	0	32	0	4
06:30:00	0	0	0	32	26	3	0	58	1	4	0	17	0	2	0	0	0	6	0	0	0	1	0	19		2	0	0	0	17	0	1	0	0	0	0	0	0	0	0	0	0	4	0	0	0	0	0	32
07:00:00	0	0	0	29	12	0	0	14	43	8	0	7	0	28	0	0	0	1	0	0	0	0	0	23		0	0	1	1	3	0	0	0	0	0	1	0	0	18	0	1	0	0	0	0	0	0	0	8
07:30:00	20	25	0	0	0	0	1	11	0	0	0	0	10	0	0	0	0	0	37	15	0	11	0	10		0	0	0	0	0	0	0	0	0	0	32	7	0	28	0	0	4	0	0	0	0	12	0	0
08:00:00	0	20	0	0	0	0	10	10	0	0	0	22	0	58	0	0	0	0	0	0	30	0	5	1		10	0	0	0	0	10	0	0	0	0	0	0	0	5	0	0	20	0	0	23	22	0	0	3
08:30:00	26	50	59	35	20	8	29	7	19	21	9	5	18	25	36	30	35	0	31	10	15	39	38	58		9	29	33	23	32	8	14	17	23	36	37	65	24	48	11	0	43	31	43	47	46	20	45	55
09:00:00	28	50	30	34	15	0	27	49	25	18	18	20	4	42	29	14	23	0	6	9	26	26	52	43		0	25	21	5	25	10	19	7	14	29	33	15	20	50	16	0	34	27	27	28	41	15	24	39
09:30:00	25	56	13	35	89	13	17	38	11	14	19	34	9	29	27	35	26	0	5	6	17	24	38	31		7	20	17	4	20	8	14	6	6	19	21	41	12	30	11	0	31	33	20	28	16	41	20	11
10:00:00	16	44	14	19	6	0	16	11	24	15	8	33	10	35	31	12	15	0	0	5	4	13	22	34		6	10	14	0	18	6	9	10	3	29	19	61	4	23	11	2	9	24	35	23	11	49	21	4
10:30:00	12	34	11	13	4	6	8	14	8	19	0	11	2	19	23	0	14	0	0	2	11	11	4	20		0	10	2	2	20	17	7	4	7	19	12	38	2	25	13	0	16	20	61	14	6	19	4	27
11:00:00	13	49	9	21	1	0	22	12	8	6	6	17	6	12	13	19	12	0	11	5	2	0	8	20		2	9	0	0	9	2	2	5	4	16	9	38	4	6	8	0	5	31	21	15	6	2	10	4
11:30:00	15	17	25	11	9	0	18	13	4	20	5	71	7	14	15	0	32	0	6	0	2	16	9	14		0	8	0	0	10	0	9	2	5	21	8	24	6	0	25	1	8	20	19	11	1	10	0	2
12:00:00	2	40	11	11	3	0	4	17	8	10	6	40	4	9	14	0	6	0	0	4	10	11	7	6		0	6	0	0	19	0	0	18	0	22	1	8	0	3	14	1	4	14	12	2	2	0	20	11
12:30:00	8	18	6	9	0	0	0	9	1	1	0	14	6	6	13	0	5	0	0	1	0	12	0	28		0	21	0	0	17	1	1	36	0	0	1	10	22	2	0	4	3	9	8	3	1	1	11	2
13:00:00	1	19	0	25	0	0	0	5	2	0	2	43	3	6	2	0	34	0	0	3	0	51	12	5		0	0	0	0	10	0	0	15	1	3	90	12	5	36	0	1	0	3	7	0	0	0	4	0
13:30:00	0	9	0	13	0	0	0	9	2	4	0	1	9	8	2	0	0	0	0	3	0	3	0	5		0	21	9	0	8	0	0	0	0	4	27	3	5	64	0	8	0	0	0	8	0	0	0	0
14:00:00	0	4	10	11	0	0	0	0	6	0	2	0	0	11	3	8	0	0	0	1	0	0	0	2		0	0	0	0	8	0	1	2	0	49	12	9	42	8	7	2	0	2	0	20	0	0	0	32
14:30:00	16	1	1	22	0	0	0	12	3	0	1	1	6	13	2	11	18	0	0	8	0	2	0	1		0	8	2	0	6	0	0	8	0	13	1	0	8	5	11	0	0	1	0	0	2	0	0	0
15:00:00	7	39	0	8	0	0	0	6	3	0	0	1	0	25	16	0	0	0	0	0	0	0	0	1		0	21	33	0	2	0	1	0	0	27	0	19	23	38	28	6	0	0	0	0	71	0	0	0
15:30:00	0	1	0	6	0	0	0	0	19	0	0	0	2	8	1	0	0	0	0	30	0	17	0	0		0	0	61	0	2	0	0	0	0	3	16	5	20	28	1	0	0	0	0	0	67	0	30	0
16:00:00	0	1	0	11	0	0	0	0	0	0	0	0	0	0	0	0	6	0	0	16	0	7	0	15		0	7	12	0	2	0	0	0	0	0	0	2	17	26	10	0	0	0	0	0	34	2	19	0
16:30:00	13	3	0	0	0	0	0	19	17	0	0	0	0	0	0	0	2	0	0	29	0	1	0	10		0	0	48	0	2	0	0	0	0	0	35	6	20	7	0	1	0	1	0	0	0	0	5	0
17:00:00	7	10	16	8	0	0	0	4	0	0	0	0	13	5	10	0	0	0	0	2	7	13	0	5		0	0	26	0	2	0	0	7	0	0	0	8	14	6	21	0	0	0	1	0	0	0	0	0
17:30:00	9	16	39	20	0	2	4	7	3	1	0	0	2	3	0	0	0	0	0	57	0	24	20	11		0	0	24	9	5	0	0	0	0	0	2	3	0	2	1	0	0	0	0	0	44	3	0	1
18:00:00	9	12	0	38	0	11	29	23	18	38	0	1	6	1	6	0	18	0	10	20	11	33	17	7		0	0	7	0	13	0	0	15	0	17	48	25	3	31	0	0	0	17	14	19	8	0	52	59
18:30:00	0	9	6	19	0	0	0	7	0	0	0	12	16	6	0	0	2	0	3	23	3	20	0	0		0	0	0	1	9	0	0	0	0	29	8	32	12	31	6	0	0	10	25	0	0	0	4	9
19:00:00	0	27	25	33	6	0	16	25	5	14	1	9	3	28	0	12	13	0	0	5	5	0	27	15		0	0	0	6	25	0	0	9	3	14	0	27	20	19	0	0	0	11	1	0	0	0	0	1
19:30:00	18	16	33	39	15	5	13	21	14	20	9	14	13	20	4	12	10	0	0	12	10	28	38	29		1	1	21	19	16	0	6	15	0	11	21	42	13	36	4	13	17	14	5	0	49	0	24	38
20:00:00	2	19	23	43	13	10	22	21	13	23	9	8	7	18	19	0	17	0	18	9	18	31	57	31		4	13	16	8	29	24	26	11	3	13	17	45	7	36	9	0	31	16	8	8	0	0	16	28
20:30:00	33	42	65	57	36	23	39	58	59	56	32	70	11	34	37	42	25	0	34	45	46	43	53	51		39	36	34	54	42	26	26	30	52	44	47	36	82	36	33	0	20	19	55	57	54	55	40	33
21:00:00	4	29	45	54	3	2	0	12	0	58	5	18	2	0	0	26	0	0	0	17	4	0	87	1		0	14	0	0	19	2	0	0	0	55	0	26	22	0	0	0	15	0	0	19	6	4	11	16
21:30:00	0	0	5	25	0	0	0	13	5	32	0	66	19	21	0	0	0	0	0	0	3	0	40	0		0	0	0	0	0	15	0	0	0	0	3	11	0	0	0	0	0	0	0	0	0	1	19	0
22:00:00	0	0	6	6	0	0	0	9	0	7	0	44	0	20	0	0	0	0	1	0	0	0	7	0		0	0	0	3	0	58	0	0	0	0	3	3	0	0	0	0	0	0	0	6	0	0	0	23
22:30:00	0	0	46	0	0	0	0	6	0	0	0	37	0	0	0	0	0	0	3	0	0	0	0	0		0	0	0	0	21	8	0	0	45	0	4	19	0	0	0	0	0	0	0	26	1	0	0	4
23:00:00	0	0	1	51	0	0	3	10	0	0	4	0	0	0	12	0	0	0	5	0	0	0	0	0		0	0	0	0	0	12	0	0	17	0	0	30	0	0	19	0	0	0	0	37	4	0	0	4
23:30:00	0	0	2	8	0	0	2	0	0	4	2	33	4	0	1	0	0	0	2	0	6	0	0	0		0	0	0	0	0	0	0	0	0	0	6	16	0	0	0	0	0	0	0	1	10	0	0	0
00:00:00	0	0	24	28	0	0	50	0	0	0	0	5	0	0	37	0	0	0	1	0	28	0	0	8		0	0	0	0	0	0	0	0	28	23	4	0	0	0	0	0	0	0	0	10	23	0	0	0
00:30:00	0	0	6	31	0	0	0	0	0	32	0	0	0	0	12	13	0	0	2	0	3	0	0	61		0	0	0	0	0	0	0	0	0	24	0	0	0	0	0	0	8	0	0	19	1	6	0	0
01:00:00	0	0	6	0	0	0	30	10	0	0	0	0	4	0	0	47	0	0	0	0	2	0	0	41		0	0	0	0	0	0	0	0	0	0	1	0	38	0	6	0	35	0	51	22	14	25	0	0
01:30:00	0	5	80	0	0	0	22	27	0	4	0	0	0	0	51	0	0	0	6	0	37	0	0	0		0	0	0	0	0	0	0	0	0	0	0	0	23	0	0	0	0	0	40	18	9	4	0	0
02:00:00	0	0	1	18	0	0	5	0	0	10	0	0	0	0	1	0	0	0	0	0	16	10	12	15		0	0	0	0	0	0	0	0	0	0	0	3	0	0	0	0	3	0	0	3	6	12	9	0
02:30:00	0	0	8	7	0	0	8	0	0	0	0	30	0	18	27	0	0	0	0	0	0	10	21	4		19	0	0	0	0	0	0	0	0	0	0	24	0	0	0	0	0	0	0	20	6	56	0	22
03:00:00	0	0	67	10	0	0	16	0	0	0	0	1	0	18	22	0	0	0	0	0	0	0	30	0		7	0	0	0	0	0	0	0	0	0	1	0	0	0	0	0	0	0	0	10	9	0	0	0
03:30:00	0	0	2	0	0	0	0	7	0	0	0	28	0	0	0	0	0	0	1	0	0	0	44	0		0	0	4	0	0	0	8	0	0	0	34	0	33	0	0	0	0	0	0	18	9	5	0	0
04:00:00	0	0	5	0	0	9	0	37	0	0	0	0	0	0	0	0	0	0	0	0	0	0	27	0		0	0	0	1	0	0	0	24	0	0	0	0	0	0	0	0	0	0	0	6	18	0	0	0
04:30:00	0	0	0	0	0	0	0	0	17	0	0	0	0	0	0	0	22	0	0	0	0	0	0	0		32	0	0	0	0	0	1	0	0	0	0	0	0	0	1	0	42	0	6	3	0	0	0	0
05:00:00	0	0	0	30	0	0	0	0	0	0	18	0	0	0	0	2	0	0	43	0	0	0	0	0		0	0	0	0	0	1	1	0	0	0	0	0	0	0	1	0	0	0	42	0	0	17	0	32
05:30:00	0	0	0	20	0	0	0	26	31	0	0	0	38	0	0	0	0	0	39	0	24	14	21	30		0	0	0	0	7	0	0	0	42	0	3	0	0	0	1	0	0	0	0	0	0	0	0	0
06:00:00	9	0	0	36	0	0	0	11	8	0	0	0	0	0	0	0	0	0	1	0	34	2	14	0		0	35	37	0	44	0	0	0	1	0	0	0	0	0	21	0	0	0	0	0	0	0	0	0
06:30:00	0	0	0	0	22	8	0	0	0	17	12	20	0	0	36	0	0	0	0	0	0	0	0	0		17	0	18	2	17	0	1	0	0	0	2	0	50	1	1	0	0	0	0	0	0	0	0	0
07:00:00	0	0	28	11	0	0	24	0	0	26	0	0	0	0	0	0	35	0	0	16	4	0	31	0		0	0	0	1	7	0	0	0	0	0	2	0	0	17	0	0	0	0	0	0	0	54	0	3
07:30:00	0	23	0	2	0	5	0	0	0	0	0	2	0	35	0	0	0	0	0	26	10	38	0	4		0	0	0	0	16	0	1	7	0	0	0	15	0	32	0	0	3	0	0	5	1	62	0	4
08:00:00	0	4	38	31	0	0	0	8	23	0	0	0	18	24	0	0	17	0	1	0	0	2	11	0		10	0	0	0	0	0	0	0	1	0	0	2	22	28	0	0	7	0	26	15	42	0	25	0
[truncated: 283 more columns]
