# Supplementary material for: High-fat diet enhances starvation-induced hyperactivity via sensitizing hunger-sensing neurons in Drosophila
Source: eLife journal article supplement (doi:10.7554/elife.53103), 2020-04-23
Supplement: supp [file elife-53103-supp-v1.zip › elife_poa_e53103_Figure_5_figure_supplement_1.pdf]

**Figure 5 – figure supplement 1**

| Gene                | Mean(HFD) | Mean(ND) | FoldChange |
|---------------------|-----------|----------|------------|
| CG7294              | 1.3991    | 0.1841   | 7.5984     |
| CG7910              | 1.9880    | 0.2844   | 6.9898     |
| snRNA:U5:63BC       | 1.5713    | 0.2649   | 5.9324     |
| CG2650              | 1.8615    | 0.3645   | 5.1074     |
| CG15282             | 59.0112   | 13.2078  | 4.4679     |
| CG11843             | 2.6143    | 0.6382   | 4.0964     |
| CG9759              | 38.3594   | 9.9453   | 3.8570     |
| Listericin          | 326.6631  | 88.7385  | 3.6812     |
| CG9029              | 1.5127    | 0.4379   | 3.4547     |
| CG1441              | 62.0552   | 20.8489  | 2.9764     |
| CG42305             | 331.1339  | 113.3872 | 2.9204     |
| Obp56h              | 87.6834   | 33.9593  | 2.5820     |
| TwdIT               | 4.9389    | 1.9952   | 2.4754     |
| Obp56d              | 1090.0258 | 443.3174 | 2.4588     |
| CG14419             | 167.7601  | 69.7858  | 2.4039     |
| to                  | 190.1015  | 79.6827  | 2.3857     |
| CG12428             | 25.9458   | 11.4670  | 2.2627     |
| CG2837              | 5.1094    | 2.2817   | 2.2393     |
| CG32694             | 96.7568   | 43.5755  | 2.2204     |
| Odc2                | 3.0378    | 1.3770   | 2.2061     |
| CG32640             | 0.0005    | 22.2552  | 0.0000     |
| CG40282             | 0.0005    | 1.7244   | 0.0003     |
| snoRNA:Me28S-A982a  | 0.0005    | 1.1774   | 0.0004     |
| snoRNA:Psi28S-3316a | 0.0556    | 1.4261   | 0.0390     |
| CG13169             | 0.1200    | 1.3404   | 0.0895     |
| CG2444              | 0.1644    | 1.0597   | 0.1551     |
| CR32658             | 0.3418    | 2.1815   | 0.1567     |
| CG14589             | 0.3728    | 1.1379   | 0.3276     |
| snoRNA:Me28S-A2634c | 2.1933    | 6.2910   | 0.3486     |
| Jhe                 | 0.4579    | 1.1316   | 0.4046     |
| CG16926             | 19.5827   | 48.0172  | 0.4078     |
| CG33057             | 2.0857    | 4.9229   | 0.4237     |
| CG16734             | 0.6453    | 1.4916   | 0.4326     |
| CG10516             | 18.8216   | 41.6938  | 0.4514     |
| CG5697              | 1.1570    | 2.4364   | 0.4749     |
| snoRNA:Psi28S-1153  | 1.2776    | 2.6815   | 0.4765     |
| CG2004              | 38.7562   | 75.4008  | 0.5140     |
| Obp19b              | 4.8387    | 9.3427   | 0.5179     |
| RabX5               | 3.0314    | 5.8214   | 0.5207     |
| shtd                | 2.5735    | 4.9180   | 0.5233     |

**Top40 differential expression genes in fly head by HFD treatment**
