# Supplementary material for: High-fat diet enhances starvation-induced hyperactivity via sensitizing hunger-sensing neurons in Drosophila
Source: eLife journal article supplement (doi:10.7554/elife.53103), 2020-04-23
Supplement: supp [file elife-53103-supp-v1.zip › elife_poa_e53103_Figure_5_figure_supplement_2.pdf]

**Figure 5 – figure supplement 2**

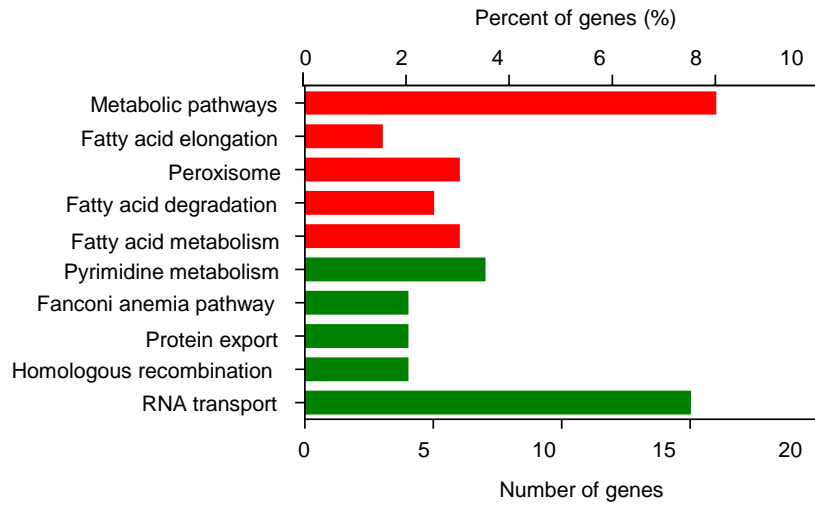

**Global analysis of different expressed genes of ND vs. HFD by KEGG pathways.**
