# Supplementary material for: High-fat diet enhances starvation-induced hyperactivity via sensitizing hunger-sensing neurons in Drosophila
Source: eLife journal article supplement (doi:10.7554/elife.53103), 2020-04-23
Supplement: supp [file elife-53103-supp-v1.zip › elife_poa_e53103_Figure_6_source_data_1.xlsx]

## Sheet: Fig 6 A (ND TOR TED)
FED(TOR TED~BD-AD-AKHR)	1023 5#															M21-10.26												1028 19#																1030 21#
20:30:00	76	81	83	105	75	110	97	114	75	65	97	65	35	76	64	52	21	15	57	58	4	37	81	2	32	73	81	52	68	88	66	69	63	82	78	47	57	63	61	69	75	67	73	68	62	44	12	31	57
21:00:00	76	94	83	77	112	86	98	94	56	61	90	76	2	70	72	1	0	2	35	26	0	8	69	6	0	30	66	36	48	82	2	51	67	77	70	83	36	38	44	76	43	35	76	53	47	62	0	27	45
21:30:00	96	19	92	32	135	51	81	95	69	51	32	75	6	68	51	11	1	0	23	0	0	3	47	1	0	0	9	9	7	91	0	58	59	39	21	26	19	30	30	39	13	22	72	13	12	46	0	23	32
22:00:00	48	0	37	13	17	0	77	20	0	60	7	1	3	45	54	2	0	0	0	0	0	0	6	0	0	0	4	0	0	30	0	14	47	0	0	0	0	0	0	13	0	13	50	0	0	23	0	42	55
22:30:00	7	0	0	5	25	0	21	0	0	0	2	0	34	0	0	2	0	0	0	0	0	0	0	0	0	0	2	0	0	0	0	0	21	0	0	0	0	0	0	0	0	1	19	0	0	0	0	37	2
23:00:00	0	0	0	3	1	0	0	0	0	4	41	0	0	0	0	8	0	0	1	0	0	0	0	0	0	0	18	0	0	0	0	0	0	0	0	0	0	0	9	0	3	0	10	0	0	0	0	12	0
23:30:00	0	0	0	7	5	0	0	0	0	7	2	0	0	0	0	7	0	0	1	0	0	0	0	0	0	0	0	0	0	0	0	0	0	0	0	0	0	0	2	0	1	0	9	0	6	0	0	13	0
00:00:00	0	2	8	5	6	0	0	0	0	3	3	0	0	0	0	6	4	0	0	0	0	8	0	0	0	0	3	0	0	0	0	0	0	0	0	0	0	0	1	0	2	6	5	2	4	0	0	0	0
00:30:00	0	0	0	13	3	0	0	0	0	0	0	0	0	0	8	0	2	0	0	0	0	0	0	0	0	0	3	0	2	0	0	0	0	0	0	0	0	0	2	0	0	1	0	0	0	0	0	6	0
01:00:00	0	0	0	0	20	0	0	0	0	0	5	0	0	0	6	0	4	0	0	0	0	0	1	0	0	0	0	0	0	0	0	0	0	0	0	0	0	0	1	0	0	14	1	44	0	0	0	0	0
01:30:00	0	0	0	2	0	0	0	0	0	0	3	7	0	0	11	0	4	0	0	0	0	0	0	0	0	0	0	0	0	0	0	0	0	0	2	0	0	0	0	0	0	11	0	7	0	0	0	0	0
02:00:00	0	0	0	0	0	0	0	0	0	0	42	7	0	0	0	0	0	0	0	0	0	0	0	0	0	0	0	0	0	0	0	0	0	0	0	0	0	0	1	0	0	22	3	0	0	0	0	0	0
02:30:00	0	0	0	0	0	0	0	0	0	0	3	13	0	0	0	0	0	0	0	0	0	0	0	0	0	0	0	0	0	0	0	0	0	0	0	0	0	0	9	0	0	17	4	0	0	0	0	0	0
03:00:00	0	0	0	0	0	0	0	0	0	0	8	24	0	0	0	0	0	0	0	0	0	0	0	0	0	0	0	0	0	0	0	0	0	0	4	0	0	0	13	0	11	8	1	0	0	0	0	0	0
03:30:00	0	0	0	0	0	0	19	0	0	0	13	13	0	0	0	0	0	0	0	0	0	0	0	0	0	0	0	0	0	0	0	0	0	0	0	0	0	0	0	0	0	38	6	0	0	0	0	0	0
04:00:00	0	12	0	0	0	0	9	0	0	0	19	6	0	0	0	0	0	0	0	0	0	0	0	0	0	6	0	0	0	0	0	0	0	0	5	0	0	0	6	0	5	50	0	13	0	0	0	0	0
04:30:00	0	0	0	0	0	0	12	0	0	0	9	28	0	0	0	0	0	0	0	0	0	0	13	0	0	3	0	0	0	0	0	0	0	0	4	0	0	0	7	0	0	61	0	33	0	0	0	4	0
05:00:00	0	4	0	0	0	0	0	0	9	0	12	92	0	18	0	2	0	0	0	0	0	0	3	0	0	12	0	0	0	0	0	0	0	0	1	0	0	0	3	0	0	22	0	7	0	0	0	0	0
05:30:00	0	1	0	0	0	0	20	0	0	0	8	5	0	6	0	0	0	0	0	0	0	6	5	0	0	1	0	0	0	0	0	2	0	1	4	0	0	0	2	10	5	40	18	4	0	0	0	0	0
06:00:00	71	0	0	0	0	0	0	0	3	0	0	0	0	18	0	0	0	0	0	0	0	19	22	0	0	7	0	0	0	0	0	42	0	0	9	0	2	0	7	3	4	12	17	0	0	0	7	0	3
06:30:00	42	0	0	0	0	0	0	0	3	0	0	32	0	12	0	0	0	0	0	0	0	0	3	0	0	0	0	0	0	0	53	22	0	0	2	0	0	0	20	3	5		4	0	0	0	0	0	0
07:00:00	2	0	0	26	0	0	0	0	0	0	5	62	0	13	7	0	7	0	0	0	0	0	2	0	0	2	0	0	0	3	41	29	0	0	0	0	18	0	0	0	4		0	0	0	0	0	0	8
07:30:00	56	0	0	66	0	0	0	37	96	0	0	29	0	0	0	10	0	0	0	0	0	0	27	0	0	0	0	0	0	24	38	35	0	0	3	0	32	0	25	0	0		0	6	2	0	0	0	0
08:00:00	26	0	35	73	0	0	0	45	58	0	13	8	0	0	0	8	0	0	0	0	5	0	3	0	0	0	0	0	0	8	29	2	0	0	3	0	26	0	6	0	0		2	3	15	0	0	6	9
08:30:00	65	64	70	41	88	64	59	31	64	57	80	37	81	46	64	64	66	41	49	5	17	33	58	25	28	29	50	38	37	47	21	38	40	60	97	60	26	32	42	56	45		45	62	49	41	37	25	10
09:00:00	49	92	64	35	54	69	66	54	85	32	80	56	97	39	46	36	67	23	34	8	26	27	53	23	17	22	36	39	28	57	31	40	38	60	68	46	25	25	37	36	30		56	55	33	27	44	34	0
09:30:00	43	56	44	33	61	56	67	33	30	42	48	34	42	46	49	20	61	34	29	19	38	38	57	14	13	18	49	21	18	42	33	51	46	46	43	40	34	31	50	34	23		53	62	28	32	32	24	10
10:00:00	14	23	43	75	115	17	54	37	56	37	62	19	18	25	39	18	35	21	12	8	18	19	38	2	21	5	25	7	12	53	22	45	40	49	34	41	31	26	34	32	27		47	15	50	37	20	29	0
10:30:00	24	11	39	16	50	22	39	32	47	31	32	22	1	35	37	27	20	25	13	20	12	11	33	10	4	5	23	6	4	31	20	45	26	34	31	31	26	21	12	48	23		39	5	19	11	10	22	9
11:00:00	7	4	14	32	33	23	26	22	36	19	29	34	6	32	20	15	14	7	5	30	27	9	18	9	4	1	24	5	3	25	12	26	18	5	17	23	18	22	13	36	10		44	7	48	9	20	16	1
11:30:00	17	9	10	42	16	15	3	37	46	9	32	15	3	9	12	10	8	17	1	0	11	14	30	1	0	3	29	0	0	14	8	18	16	0	6	17	14	10	4	10	3		44	6	7	15	15	18	0
12:00:00	16	1	3	28	8	8	12	30	38	11	19	37	0	17	23	11	3	2	0	2	5	8	23	3	2	0	3	2	2	0	6	11	19	2	4	2	6	5	7	11	5		14	6	7	12	12	20	2
12:30:00	4	0	0	30	13	8	0	20	28	5	18	15	7	0	8	0	0	2	0	0	11	1	14	6	0	0	0	2	0	4	19	21	36	0	6	9	11	0	5	0	4		28	1	7	14	15	8	0
13:00:00	4	0	0	33	1	57	0	15	23	1	10	9	17	5	0	7	0	2	0	0	2	29	5	6	3	0	0	0	0	0	15	17	25	0	2	15	3	0	0	0	1		18	11	5	9	6	3	1
13:30:00	3	36	0	41	0	23	0	23	12	6	3	7	24	0	0	1	0	4	0	0	0	0	0	6	8	0	0	0	0	0	8	6	19	0	1	0	3	0	0	0	1		3	0	0	0	4	8	0
14:00:00	4	20	0	39	0	5	0	19	20	3	3	22	14	0	17	0	0	0	5	0	3	0	1	15	0	0	0	0	0	0	1	11	13	9	1	0	2	0	29	0	0		2	4	0	0	0	1	0
14:30:00	1	30	0	26	0	15	0	6	1	6	6	9	39	0	56	0	7	16	1	0	3	0	0	25	0	0	0	0	0	0	1	1	1	0	0	0	0	0	1	0	2		4	0	0	0	8	1	0
15:00:00	14	12	1	15	0	7	0	1	0	0	0	13	25	0	11	0	0	3	1	0	0	0	0	11	0	0	0	0	0	0	0	2	6	0	0	0	0	0	0	0	0		0	0	0	0	5	18	0
15:30:00	0	40	14	7	0	0	0	2	1	0	0	7	12	1	49	0	0	0	1	0	0	0	2	27	0	0	0	0	0	0	0	10	8	2	8	0	0	0	0	0	0		0	0	0	0	11	4	5
16:00:00	0	18	8	12	23	27	0	0	0	10	0	0	0	7	30	10	3	1	0	0	0	0	7	15	0	0	4	0	0	0	0	5	3	0	0	0	0	0	0	0	3		0	0	0	0	2	8	0
16:30:00	1	15	26	2	4	37	0	0	19	17	1	2	7	8	22	18	32	12	0	24	21	53	45	29	17	24	50	0	0	0	15	5	8	0	2	0	0	0	0	0	0		0	0	0	0	0	0	2
17:00:00	2	10	3	0	0	3	0	1	11	1	0	18	16	1	0	37	1	6	0	0	2	3	2	3	5	2	7	0	0	0	12	7	8	0	2	0	0	0	15	0	0		0	22	0	0	11	10	4
17:30:00	9	12	31	10	0	0	4	2	5	18	0	12	19	10	23	0	2	0	0	0	0	0	0	0	0	1	6	0	0	0	1	3	7	0	1	0	0	0	0	0	1		0	24	0	0	2	5	0
18:00:00	5	5	7	22	4	39	10	36	0	0	0	18	1	12	3	2	0	1	0	1	6	19	35	0	0	26	20	0	0	0	20	15	7	0	0	0	0	0	22	0	10		0	26	19	10	32	17	0
18:30:00	9	9	4	5	0	7	46	26	0	10	0	17	1	5	7	4	0	1	0	0	0	4	3	0	0	1	23	0	0	0	12	18	28	5	0	0	3	0	6	0	1		3	21	3	1	9	14	0
19:00:00	8	2	0	18	0	8	14	33	20	4	4	36	1	4	1	4	0	16	0	1	0	9	18	0	12	19	40	0	0	0	16	14	10	3	12	0	23	2	8	0	14		1	45	18	2	12	10	3
19:30:00	15	17	0	28	0	41	0	27	3	20	1	36	5	0	0	1	0	0	0	0	0	6	32	22	20	49	34	31	4	12	17	28	10	41	38	28	49	28	32	16	31		29	33	20	13	21	11	0
20:00:00	24	72	41	31	32	3	0	33	74	17	40	36	3	48	0	28	45	26	0	2	1	19	61	24	21	78	28	0	0	8	5	3	3	47	2	6	22	8	24	29	0		68	34	40	11	13	20	4
20:30:00	63	90	78	75	104	79	62	106	84	91	67	63	85	91	87	67	68	48	57	48	14	49	89	30	40	77	87	13	41	58	55	77	44	81	53	65	69	57	59	54	49		99	82	33	70	45	60	15
21:00:00	64	65	88	71	81	25	67	39	52	57	15	5	0	50	73	0	3	0	25	35	0	0	97	0	0	3	46	0	0	2	0	13	39	14	0	0	45	49	20	20	0		96	15	19	26	0	15	0
21:30:00	53	3	21	13	44	2	39	22	0	49	0	7	0	0	53	0	0	0	0	17	20	0	34	0	0	0	33	0	0	0	0	0	47	0	0	0	0	33	6	0	3		73	0	0	0	0	6	0
22:00:00	23	3	0	0	2	1	6	0	0	9	0	6	3	0	13	0	0	0	0	0	8	0	0	0	0	0	41	14	0	1	0	0	6	0	0	0	0	4	15	0	3		1	0	0	0	0	0	0
22:30:00	6	1	0	4	0	0	0	0	0	0	0	0	2	0	0	0	0	0	0	0	2	0	0	0	0	0	0	0	0	2	0	0	19	0	0	0	9	0	0	0	0		0	0	0	0	13	0	0
23:00:00	0	0	0	0	0	3	0	0	0	8	0	15	2	0	0	0	0	0	0	38	0	0	0	0	0	0	0	0	0	13	0	0	2	0	0	0	0	0	0	0	0		0	0	0	0	0	0	0
23:30:00	0	2	0	6	0	0	0	0	0	0	0	12	50	0	0	0	0	25	0	1	0	0	0	0	0	0	0	0	0	3	0	0	5	0	0	0	0	0	0	0	0		0	0	0	0	10	0	0
00:00:00	0	0	0	0	0	0	0	0	6	0	0	1	0	0	0	0	0	16	0	0	2	0	0	0	0	0	0	0	0	3	0	0	8	0	5	0	0	0	0	0	0		0	0	0	0	0	4	1
00:30:00	0	0	0	0	0	0	0	2	0	0	0	12	0	30	0	0	0	0	0	0	14	0	0	0	0	0	0	0	0	2	0	0	24	10	0	0	0	0	0	0	0		0	0	0	0	0	27	1
01:00:00	0	5	0	0	0	0	0	0	0	0	0	9	0	0	0	0	0	5	0	0	9	3	0	0	0	0	0	0	0	0	0	0	30	53	0	0	0	0	0	0	2		0	0	0	0	0	11	7
01:30:00	4	11	0	0	0	0	0	0	0	5	0	19	0	0	0	6	0	3	0	0	0	34	0	0	0	0	0	0	0	0	0	0	16	45	0	0	0	0	0	0	25		5	0	0	0	0	4	0
02:00:00	1	0	0	0	0	5	0	0	0	1	0	5	1	0	0	13	0	3	0	0	1	6	0	0	0	0	17	0	0	0	0	0	15	0	0	0	0	0	0	0	3		0	0	0	0	0	0	29
02:30:00	0	0	0	0	0	0	0	0	8	0	0	4	0	2	0	15	4	1	0	0	1	9	0	0	0	0	0	0	0	0	0	0	10	0	0	0	0	0	0	0	0		28	3	0	0	12	0	0
03:00:00	0	0	0	0	0	0	0	0	0	0	0	40	0	0	0	0	23	16	0	0	0	11	0	0	0	0	0	0	0	0	0	0	21	0	0	0	0	0	0	0	0		53	26	0	0	4	0	0
03:30:00	13	0	0	0	0	0	0	0	0	0	0	23	1	1	0	0	0	3	0	0	0	14	43	0	0	0	21	0	0	0	0	0	5	0	0	0	7	0	0	0	0		36	8	0	0	17	0	0
04:00:00	0	0	0	0	0	0	0	0	0	11	0	4	0	2	0	0	0	13	0	0	0	0	0	0	0	0	6	20	0	4	21	0	0	0	0	0	15	0	0	0	0		35	3	0	0	3	8	0
04:30:00	0	0	0	15	0	0	0	0	0	7	5	6	0	6	0	0	0	0	0	0	0	0	35	0	0	0	0	1	0	0	32	0	6	19	0	0	3	0	0	0	0		43	11	0	14	0	24	4
05:00:00	57	0	0	0	0	2	0	1	24	43	0	0	0	8	0	19	0	16	0	0	0	0	3	0	0	0	47	0	0	0	32	0	16	60	0	12	14	0	0	0	0		22	10	13	25	0	6	11
05:30:00	32	0	0	5	0	0	0	71	14	26	0	0	1	0	0	0	0	0	0	0	14	0	0	0	0	0	29	0	0	0	7	12	0	19	0	44	0	0	0	0	0		15	25	4	0	0	4	0
06:00:00	21	45	16	53	0	0	4	43	12	0	0	34	0	3	0	0	0	0	0	0	0	8	45	0	0	0	0	0	0	0	0	35	0	32	0	6	0	0	0	0	0		0	0	0	9	0	3	0
06:30:00	12	22	18	74	0	15	28	6	0	0	0	2	0	32	0	0	0	0	0	17	2	0	12	0	0	0	0	19	0	0	0	26	0	6	0	0	0	0	0	0	0		2	2	0	12	0	0	17
07:00:00	33	44	25	33	0	47	26	0	48	0	14	19	6	8	10	6	21	33	0	0	0	0	0	0	0	5	0	0	0	0	8	6	20	2	0	0	20	20	0	0	0		18	0	7	2	24	5	0
07:30:00	5	11	11	0	0	2	0	0	13	0	17	15	34	16	22	5	0	10	0	0	0	4	28	0	0	0	0	0	0	0	11	0	2	6	0	2	2	1	2	0	0		0	3	0	2	0	0	3
08:00:00	22	0	0	26	1	26	0	28	16	0	35	37	51	75	0	6	0	0	0	0	0	18	19	0	0	0	0	0	8	19	21	38	0	43	0	19	19	0	28	2	6		20	19	0	8	11	33	6
08:30:00	31	93	65	69	73	58	36	59	76	47	54	41	58	54	38	78	73	53	53	23	62	54	52	46	32	57	56	37	24	40	25	38	32	44	54	50	42	36	39	57	38		63	32	28	39	48	27	54
09:00:00	37	63	44	67	67	36	34	59	34	36	40	34	57	35	31	30	62	42	16	19	39	33	52	39	29	25	45	19	9	30	17	38	27	38	44	32	18	51	31	44	28		71	30	27	41	34	25	24
09:30:00	41	40	33	41	37	29	37	41	50	19	33	15	34	32	31	44	46	49	21	25	43	29	48	10	17	33	36	16	11	31	8	19	23	26	25	23	39	47	18	30	25		65	33	26	27	45	36	18
10:00:00	34	21	28	30	33	13	53	34	42	17	48	20	10	17	26	26	26	42	20	23	24	24	33	13	20	17	47	2	7	33	19	30	18	23	21	32	27	35	16	35	19		78	20	30	29	23	41	11
10:30:00	31	17	28	37	31	44	48	29	26	19	20	16	3	17	24	31	36	40	5	12	24	25	34	1	8	9	26	1	2	12	12	14	29	28	18	25	23	28	31	33	21		60	13	20	17	20	21	19
11:00:00	37	5	19	40	43	16	48	34	39	10	25	19	9	20	18	25	33	36	8	10	4	23	26	0	19	4	25	1	19	4	11	31	11	33	29	41	22	18	17	22	17		68	4	14	19	14	30	3
11:30:00	21	1	26	90	39	17	48	29	14	4	14	13	3	25	6	23	6	35	3	8	4	23	10	2	12	5	23	0	0	0	12	15	9	15	21	26	17	12	14	94	9		53	18	14	14	12	19	8
12:00:00	19	8	11	75	35	4	23	14	6	6	20	21	2	20	9	18	4	26	0	0	7	19	17	1	1	2	7	3	0	0	11	14	9	21	12	10	6	0	6	14	13		51	11	5	8	14	25	6
12:30:00	31	58	4	19	29	4	21	17	0	9	10	10	9	12	0	28	0	31	0	2	2	13	18	0	10	2	3	0	0	2	3	12	13	15	7	1	9	11	3	17	2		51	5	45	12	8	20	7
13:00:00	19	16	2	26	19	18	3	16	4	3	6	7	67	7	1	41	0	29	0	2	16	16	6	2	1	0	5	0	17	0	4	17	12	2	4	0	2	4	0	17	1		21	2	10	4	8	20	15
13:30:00	10	12	1	15	4	0	1	19	6	3	0	4	14	0	0	6	0	31	0	2	4	2	3	0	2	0	0	1	2	0	7	14	26	0	3	0	5	0	1	15	1		12	0	0	8	2	11	1
14:00:00	1	20	1	6	11	0	0	15	13	0	1	2	21	0	0	0	0	2	0	20	5	0	0	2	0	0	0	5	5	1	4	9	6	10	7	5	0	0	2	6	2		6	0	0	0	4	17	0
14:30:00	1	23	6	4	1	2	15	7	0	6	1	0	0	0	0	0	0	2	0	0	12	0	7	0	0	0	0	19	8	3	3	8	1	0	6	1	2	0	2	2	0		8	3	0	0	8	4	0
15:00:00	15	6	4	47	0	1	1	3	0	0	10	0	10	0	26	0	0	3	0	0	1	0	0	0	22	0	13	2	0	2	0	6	22	5	2	0	0	0	0	2	0		2	1	0	0	3	8	0
15:30:00	59	27	16	6	0	29	0	0	5	0	44	0	9	2	95	0	0	0	0	0	8	11	13	0	19	0	1	0	5	0	3	0	2	0	0	0	0	0	14	0	0		4	0	1	0	7	4	0
16:00:00	7	13	31	3	0	14	0	7	14	29	0	16	1	19	16	11	0	18	0	6	0	39	18	0	20	12	28	0	0	4	16	9	11	24	0	0	0	27	3	4	0		14	3	29	6	21	11	0
16:30:00	62	5	13	16	0	12	3	0	19	0	9	33	3	6	0	0	4	32	0	0	8	43	1	0	0	8	9	0	0	3	0	2	2	0	0	0	0	0	7	5	0		24	1	30	0	4	0	0
17:00:00	8	39	31	40	10	73	17	30	19	34	23	13	5	34	4	0	0	36	0	0	18	40	2	0	0	6	4	0	2	0	8	9	4	3	15	0	0	0	18	4	0		0	2	0	0	0	3	0
17:30:00	20	0	0	10	0	2	4	32	14	8	1	9	4	1	0	3	0	47	0	0	12	33	16	0	0	7	0	5	0	0	7	11	1	10	12	0	0	0	0	2	0		40	15	0	0	7	0	1
18:00:00	8	3	0	6	0	0	17	3	13	0	16	22	65	0	0	0	0	33	0	0	11	35	4	0	0	4	2	6	24	3	16	3	15	0	11	0	0	0	0	10	0		32	3	0	0	0	5	1
18:30:00	19	0	0	0	38	21	10	0	11	4	0	28	1	3	0	0	1	31	0	0	2	34	8	0	19	12	6	0	0	0	17	15	10	2	14	0	10	0	2	31	0		46	42	42	28	25	21	18
19:00:00	11	35	2	0	12	14	12	14	0	6	0	15	0	0	0	0	13	18	2	0	23	30	10	5	17	13	0	0	0	0	11	14	5	11	6	0	12	0	24	40	0		44	25	19	15	2	10	22
19:30:00	43	1	0	27	5	1	25	13	0	10	0	25	4	6	0	52	44	11	9	0	9	45	38	47	44	17	28	0	0	2	6	21	16	0	26	0	12	23	6	28	3		46	28	21	13	10	23	11
20:00:00	15	1	2	51	25	16	43	40	26	13	31	34	15	44	16	63	54	39	28	0	24	40	59	55	15	38	33	22	8	25	12	24	13	39	38	25	39	45	26	26	28		79	36	34	18	14	30	10
20:30:00	67	100	90	65	116	113	67	49	89	70	68	56	34	73	94	19	43	58	48	57	52	58	68	35	39	82	56	12	59	75	32	50	45	83	63	63	56	81	51	60	50		97	57	38	59	36	52	35
21:00:00	24	62	38	14	75	23	87	64	29	55	42	4	13	26	49	0	1	11	17	2	0	27	52	0	0	9	78	0	10	37	9	47	43	23	0	2	81	46	21	69	4		112	5	5	1	0	19	0
21:30:00	8	22	0	0	25	0	55	22	0	87	0	0	8	3	30	0	0	18	0	3	0	25	73	0	0	0	60	0	0	18	0	15	0	0	0	0	21	0	4	33	15		100	0	0	0	0	3	2
22:00:00	84	16	0	0	0	5	8	8	0	0	0	0	0	0	0	0	0	23	0	3	0	71	6	0	0	0	51	0	0	24	0	0	0	1	2	0	2	0	0	0	6		74	0	0	0	0	0	0
22:30:00	12	7	0	1	0	0	0	19	0	5	0	15	0	0	0	0	0	7	0	0	0	34	6	0	0	0	18	0	0	24	0	0	0	0	0	0	49	0	0	0	7		0	2	0	0	0	0	0
23:00:00	12	28	0	5	0	0	0	34	3	0	0	41	20	0	0	0	0	0	0	3	0	32	0	0	0	0	8	0	0	17	0	0	0	0	4	25	0	0	0	0	10		0	0	0	0	0	0	2
23:30:00	3	0	0	0	0	0	9	0	0	0	4	31	30	0	0	0	15	0	0	0	0	0	0	0	0	0	43	0	0	11	0	0	0	0	11	0	0	0	0	0	9		0	0	0	0	0	0	0
00:00:00	19	3	6	18	0	0	0	0	0	5	5	39	38	0	0	0	0	23	0	22	0	0	0	0	0	7	10	0	0	24	0	0	0	1	0	0	58	0	0	0	1		0	0	0	0	0	0	3
00:30:00	3	26	0	21	0	0	0	0	0	7	28	16	5	0	0	12	17	3	0	17	0	0	46	0	0	32	14	0	0	19	0	0	0	17	0	0	2	0	0	3	10		0	0	0	0	0	0	31
01:00:00	8	16	0	14	18	0	21	0	0	3	2	0	0	0	0	0	0	0	0	0	0	1	0	0	0	0	32	0	0	26	0	0	0	20	9	0	5	0	0	0	0		1	0	0	0	0	0	3
01:30:00	37	0	3	43	19	0	41	0	0	14	0	19	1	15	0	0	15	22	0	0	0	32	30	0	0	0	22	0	0	0	0	0	6	0	51	0	0	0	0	0	0		0	0	0	0	0	0	0
02:00:00	5	0	0	0	12	0	0	0	0	0	0	24	1	1	0	39	0	0	0	0	0	13	37	0	0	0	14	0	0	23	0	0	38	8	0	0	0	0	0	0	0		0	0	0	2	0	0	0
02:30:00	7	0	0	0	0	0	33	0	0	0	0	16	4	0	0	0	0	0	0	0	0	0	18	0	0	0	0	0	0	0	13	0	11	28	0	0	0	0	0	0	0		0	0	0	20	0	0	1
03:00:00	4	0	0	0	14	0	34	11	0	26	0	6	30	0	0	0	0	0	0	0	0	0	22	0	0	0	0	0	0	2	45	0	36	0	0	0	0	0	27	0	4		0	0	0	3	5	0	3
03:30:00	10	20	0	0	0	1	22	0	0	45	0	18	2	0	0	0	0	0	0	0	0	0	0	0	0	0	0	0	0	51	53	0	13	0	0	0	0	0	32	0	0		46	0	0	0	10	0	5
04:00:00	4	41	16	0	0	0	32	0	5	30	108	0	1	12	0	0	0	3	0	0	0	0	23	0	0	0	7	7	0	13	21	0	7	0	0	0	0	0	0	0	8		33	37	0	8	1	28	0
04:30:00	3	25	50	0	8	19	28	2	0	47	52	0	0	0	0	0	0	8	0	5	0	0	19	4	0	0	14	0	4	23	18	0	20	13	0	0	0	0	0	0	0		54	43	0	17	14	16	1
05:00:00	22	0	7	0	18	0	6	18	6	41	15	0	1	0	0	2	0	3	0	0	0	0	0	0	0	0	12	0	0	22	0	17	17	51	0	0	57	0	0	0	0		36	40	0	18	36	21	7
05:30:00	29	0	0	0	0	0	40	0	53	7	44	4	0	6	0	22	11	13	0	0	0	0	27	3	0	0	59	3	11	7	0	21	3	39	0	0	19	0	0	8	0		36	19	3	26	0	29	0
06:00:00	16	48	19	0	0	40	24	8	50	13	0	52	2	17	0	23	34	0	30	6	12	0	2	0	2	0	47	0	3	17	18	26	4	20	0	0	24	0	2	44	0		21	0	2	0	0	5	3
06:30:00	16	0	18	13	0	12	12	4	10	12	0	27	27	37	36	69	26	0	9	0	3	0	53	4	6	16	0	0	0	6	38	12	12	6	0	31	34	0	47	28	0		2	0	38	14	0	5	0
07:00:00	24	3	0	0	35	13	1	0	0	0	38	21	19	12	25	6	48	0	0	0	0	21	42	24	25	0	4	0	0	8	13	9	0	6	0	36	24	0	141	11	0		8	4	24	12	0	0	0
07:30:00	14	0	24	0	4	5	71	0	0	0	20	37	0	25	7	35	7	23	0	0	8	17	27	0	1	0	0	0	0	26	6	4	0	22	0	12	17	7	2	26	0		15	31	21	11	28	14	0
08:00:00	12	20	24	25	39	33	81	35	43	13	10	19	11	38	12	32	31	43	14	0	3	0	55	0	26	0	24	0	53	17	20	11	26	30	0	15	29	44	32	52	0		51	41	30	4	11	15	15
[truncated: 326 more columns]

## Sheet: Fig 6 B (HFD TOR TED)
FED(TOR TED~BD-AD-AKHR)	M25-8.4																M44-7.31															M45-7.31																	+sucrose
20:30:00	79	28	93	82	83	66	74	30	74	107	83	84	39	75	22	58	35	32	42	55	61	59	40	68	39	71	44	54	43	30	28	42	60	79	57	81	59	53	71	48	54	52	73	99	39	58	57		58.7234
21:00:00	29	0	39	2	0	60	0	0	0	7	66	37	0	2	0	11	41	28	24	29	49	52	59	78	47	2	42	26	43	11	4	0	34	30	36	60	64	46	6	10	0	32	3	9	19	0	40		25.0426
21:30:00	0	0	0	0	0	27	0	0	0	0	0	0	0	0	0	0	48	1	0	0	0	11	38	58	13	0	37	0	11	0	5	0	33	0	0	3	0	6	0	0	0	0	0	0	0	0	0		6.19149
22:00:00	0	0	0	0	0	0	0	0	0	0	0	0	0	0	0	0	24	0	0	0	0	0	0	0	0	1	24	0	0	0	10	0	2	0	0	9	0	0	0	0	0	3	0	0	0	0	0		1.55319
22:30:00	0	0	0	0	0	0	0	0	0	0	0	0	0	0	43	0	0	0	0	8	0	0	0	0	0	1	0	0	0	0	13	0	0	0	0	4	0	0	0	0	0	32	0	0	0	0	0		2.14894
23:00:00	0	0	0	0	0	0	0	0	0	4	0	0	0	0	0	0	15	0	0	0	0	0	0	0	0	4	0	0	0	0	16	0	0	0	0	6	0	0	0	0	0	0	0	0	0	0	0		0.957447
23:30:00	0	0	0	0	0	0	0	0	0	8	0	0	0	0	1	0	0	0	0	0	0	0	0	0	0	20	0	0	0	0	5	0	0	0	0	3	0	0	0	0	0	35	0	0	0	0	0		1.53191
00:00:00	0	0	0	0	4	0	0	0	0	0	0	0	0	0	0	0	0	0	0	5	0	0	0	0	26	4	0	0	0	0	7	0	0	0	0	2	0	0	0	0	0	0	0	0	0	0	0		1.02128
00:30:00	0	0	0	0	13	0	0	0	0	2	0	0	0	0	7	0	0	0	0	22	0	0	0	0	0	12	0	0	0	0	11	0	0	0	0	0	0	0	0	0	0	0	0	0	0	0	0		1.42553
01:00:00	5	0	0	0	0	0	0	0	0	8	0	0	0	0	0	0	0	0	0	0	0	0	0	0	0	22	0	0	0	0	12	0	0	0	0	0	0	0	0	0	6	0	0	0	0	0	0		1.12766
01:30:00	0	0	0	0	0	0	0	0	0	3	0	0	14	0	0	0	0	0	0	0	0	0	0	0	0	0	0	0	0	0	2	0	0	0	0	0	0	0	0	0	6	0	0	0	2	0	7		0.723404
02:00:00	0	0	0	0	8	0	0	0	0	8	0	0	5	0	0	0	14	0	0	0	0	0	8	0	0	0	0	0	0	0	12	0	0	0	0	0	0	0	9	0	20	0	0	0	53	14	6		3.34043
02:30:00	0	0	0	0	24	0	0	0	0	33	0	0	10	0	3	0	21	0	0	4	0	0	32	0	0	0	0	0	0	0	5	0	0	0	0	0	0	0	33	0	6	0	0	0	31	68	11		5.97872
03:00:00	0	0	0	0	5	2	0	10	0	0	0	0	2	0	2	22	0	0	0	0	0	0	0	0	0	0	0	0	0	0	14	0	6	0	0	0	0	0	7	0	0	0	0	0	0	17	19		2.25532
03:30:00	0	0	0	0	0	0	0	6	0	19	0	0	1	0	0	1	0	0	0	0	0	0	0	0	0	0	0	0	0	0	14	0	47	0	0	0	0	0	0	0	0	0	7	0	0	11	27		2.82979
04:00:00	0	0	0	0	0	0	0	0	0	10	0	0	1	0	0	5	0	0	8	0	0	0	0	0	0	0	0	0	0	0	11	0	2	0	0	0	0	0	0	0	0	0	4	0	0	85	62		4
04:30:00	0	0	0	0	0	0	0	0	0	27	4	0	0	0	0	3	9	0	13	0	0	0	0	0	0	0	0	0	0	0	9	0	0	0	0	0	0	0	0	0	3	0	7	0	0	17	74		3.53191
05:00:00	0	0	0	0	0	0	0	0	0	4	0	0	1	0	39	44	0	0	10	14	0	0	0	0	0	0	10	0	0	0	10	0	0	0	0	0	0	57	0	0	68	0	4	0	13	0	6		5.95745
05:30:00	0	0	0	0	0	8	0	0	0	11	0	0	0	0	0	4	16	0	0	8	0	0	0	0	0	3	36	0	0	0	15	30	18	0	0	27	0	48	0	0	0	0	0	0	5	0	0		4.87234
06:00:00	39	0	0	0	0	0	0	0	0	10	0	0	0	0	0	13	0	0	0	0	0	40	0	0	4	37	12	0	0	0	5	19	0	0	0	54	0	26	0	0	0	0	82	0	8	0	0		7.42553
06:30:00	0	0	0	0	0	5	0	0	0	14	0	0	0	0	2	42	14	34	0	0	0	0	19	0	9	14	0	0	0	0	1	0	21	0	43	17	53	0	6	0	0	0	53	0	0	7	0		7.53191
07:00:00	0	0	0	0	13	0	0	0	0	10	0	0	0	0	0	7	9	10	0	0	0	24	36	17	7	0	0	0	0	0	0	0	7	0	69	3	31	12	0	0	1	0	4	0	0	0	0		5.53191
07:30:00	0	0	0	0	0	0	0	0	0	21	0	0	32	0	0	34	18	0	0	7	39	0	0	52	0	7	0	0	0	0	0	0	30	0	34	27	28	0	5	0	0	0	0	0	18	36	61		9.55319
08:00:00	0	0	0	12	0	0	0	28	0	7	14	0	0	0	0	3	10	0	0	20	50	14	19	46	0	18	19	9	0	0	2	0	8	48	12	40	19	30	20	17	29	0	54	98	7	55	32		15.7447
08:30:00	58	35	48	51	29	76	46	31	39	62	64	54	49	42	21	54	32	47	52	53	32	59	47	48	25	60	21	28	47	10	12	39	47	49	62	48	47	28	63	87	46	0	70	78	54	57	54		45.9787
09:00:00	34	23	23	31	32	55	59	38	45	37	42	21	47	32	18	45	27	34	32	26	35	62	40	37	16	35	27	39	43	3	19	37	48	60	81	47	59	28	37	60	39	0	64	82	50	61	69		39.9787
09:30:00	34	28	55	41	57	64	59	21	42	27	35	37	39	20	28	37	28	41	30	47	22	45	41	48	16	41	34	2	26	0	22	35	38	47	65	53	41	31	43	49	64	0	51	72	32	62	61		38.5319
10:00:00	42	11	51	29	224	47	47	12	36	14	31	43	24	5	20	16	27	20	10	21	18	36	21	12	6	26	24	7	29	0	18	12	27	54	60	46	30	48	36	56	61	0	46	60	45	33	54		33.9362
10:30:00	42	11	32	33	32	29	30	5	39	1	32	20	11	7	13	12	13	29	3	39	24	34	16	43	8	13	18	0	44	0		40	35	36	60	37	45	41	37	37	41	0	40	59	38	37	63		27.8043
11:00:00	3	3	15	34	7	35	36	5	25	2	28	14	14	2	16	11	19	19	0	52	24	37	31	15	1	8	18	7	14	0		12	34	37	56	41	32	40	36	33	22	208	43	55	37	32	84		28.1957
11:30:00	1	2	5	41	24	44	16	4	19	2	17	8	6	0	8	0	9	7	0	34	8	29	6	8	31	0	28	0	15	0		0	32	25	48	38	37	39	26	0	35	56	33	63	53	52	51		20.8696
12:00:00	0	2	0	2	8	33	4	1	8	1	21	0	31	30	1	1	5	24	0	30	16	24	28	13	24	7	33	0	8	0		0	29	29	40	27	47	27	17	48	52		21	44	53	63	56		20.1778
12:30:00	0	0	0	0	2	10	3	6	4	0	6	2	5	0	3	0	4	16	0	38	7	34	14	2	0	0	16	41	27	0		0	20	9	28	48	19	16	16	2	62		26	42	43	29	48		14.4
13:00:00	0	0	0	0	25	11	0	0	2	0	2	0	8	14	0	4	5	15	1	18	19	26	17	12	4	0	16	4	15	0		8	21	25	10	33	39	19	2	17	39		18	31	40	43	58		13.8
13:30:00	0	0	0	0	0	0	0	8	2	0	1	0	0	2	0	0	2	2	6	7	12	21	23	17	8	0	31	0	9	0		9	28	12	0	40	35	17	0	0	11		21	36	39	22	44		10.3333
14:00:00	0	0	0	0	0	0	0	15	0	0	2	0	0	13	0	0	0	0	0	3	2	31	8	0	7	0	18	0	21	0		0	24	21	33	34	14	9	0	0	0		0	46	18	26	43		8.62222
14:30:00	0	0	0	0	0	0	0	0	0	0	1	6	0	0	0	1	7	0	0	9	0	6	3	0	1	0	19	0	0	0		0	4	0	0	18	13	9	0	0	0		2	25	29	20	46		4.86667
15:00:00	0	0	0	0	1	0	0	0	15	0	1	12	0	16	0	0	0	0	0	1	0	1	0	0	6	0	7	0	0	0		0	2	0	0	31	13	4	0	4	0		0	20	9	5	11		3.53333
15:30:00	0	0	0	0	5	0	0	0	0	0	0	13	0	0	4	0	2	25	18	9	32	12	15	0	0	14	1	17	6	0		0	3	53	17	22	23	9	7	19	0		0	41	24	10	16		9.26667
16:00:00	0	0	6	0	81	0	0	0	0	6	0	8	0	3	0	12	0	0	0	3	6	0	0	0	0	8	0	0	0	0		0	1	9	1	1	1	0	0	0	0		0	10	27	17	22		4.93333
16:30:00	0	0	1	0	0	0	0	0	0	10	0	25	1	0	0	47	0	0	20	0	0	0	0	0	2	17	0	0	0	0		0	0	0	0	4	4	0	2	0	0		0	27	35	0	0		4.33333
17:00:00	0	0	0	0	0	0	0	0	0	13	0	0	2	21	7	9	53	20	19	43	45	51	33	52	36	23	20	31	44	8		34	45	42	37	41	50	49	23	50	19		81	50	21	11	24		24.6
17:30:00	1	0	0	0	8	0	0	0	0	81	6	19	0	6	0	38	16	0	1	45	11	31	25	64	36	63	12	0	6	0		2	6	19	0	6	16	19	17	19	10		45	18	21	7	40		15.8667
18:00:00	11	0	11	0	0	0	0	6	0	19	25	18	6	6	4	2	2	22	0	27	13	31	15	0	26	44	8	0	2	0		2	22	9	10	6	10	8	14	49	0		58	35	25	8	24		12.8444
18:30:00	41	0	0	0	7	0	0	0	0	0	2	6	0	3	0	12	0	21	5	35	2	12	3	25	22	13	22	0	0	21		0	1	25	5	13	41	13	8	17	46		41	53	18	11	46		13.1111
19:00:00	20	0	0	0	23	0	12	1	0	41	4	15	0	0	14	14	5	21	0	20	25	16	8	0	15	24	18	0	0	11		19	1	25	25	1	65	23	26	14	19		3	50	30	24	33		14.7778
19:30:00	0	0	3	0	33	0	0	3	23	0	21	0	12	0	0	34	2	8	0	39	9	16	7	36	31	11	13	0	0	27		7	22	18	25	20	47	24	17	34	70		15	61	32	38	42		17.7778
20:00:00	28	17	27	7	6	33	5	14	26	8	49	3	0	0	26	30	26	18	2	38	10	31	9	29	12	20	12	0	0	6		2	24	48	14	14	51	36	25	56	49		25	73	44	22	59		22.9778
20:30:00	74	74	54	82	27	62	69	32	32	26	54	66	3	73	32	43	56	51	61	79	70	104	22	76	34	63	62	43	59	10		85	61	98	85	51	71	94	33	77	65		72	117	49	70	68		59.7556
21:00:00	12	7	0	1	3	0	0	0	1	0	0	0	0	0	0	1	9	2	7	17	4	20	45	6	14	10	37	0	23	0		0	46	40	0	0	0	23	41	26	71		20	76	21	46	5		14.0889
21:30:00	0	0	0	0	19	0	3	0	0	0	0	0	0	0	0	0	0	0	8	45	0	0	0	0	20	0	3	0	4	0		0	9	15	0	0	0	0	19	2	17		43	0	0	54	0		5.8
22:00:00	0	0	0	0	0	0	0	0	0	0	0	0	0	0	2	0	0	0	12	17	0	0	0	2	0	0	0	0	0	0		0	39	20	0	0	0	0	7	0	4		43	0	0	18	16		4
22:30:00	0	0	0	0	0	0	0	0	0	0	0	0	3	0	0	18	0	0	22	4	0	6	0	0	10	0	0	17	0	0		0	6	27	0	0	0	0	14	12	6		29	5	0	0	8		4.15556
23:00:00	0	0	0	0	0	0	0	0	0	0	0	0	0	0	0	0	0	0	11	0	4	12	0	0	0	0	0	22	0	0		0	36	10	0	0	0	20	12	36	0		47	16	19	3	2		5.55556
23:30:00	0	0	0	0	0	0	0	0	0	0	0	0	0	0	0	7	0	0	0	21	0	12	0	0	48	0	0	6	0	0		0	0	0	0	0	0	0	13	12	0		24	37	36	9	0		5
00:00:00	0	0	0	0	3	0	0	0	0	0	0	0	0	0	0	14	0	0	2	12	13	3	0	0	0	0	0	0	0	0		0	0	0	0	0	0	10	9	19	0		39	14	1	25	0		3.64444
00:30:00	0	0	0	0	0	0	0	0	0	0	0	0	0	0	0	1	0	0	0	0	0	0	0	0	0	0	0	0	0	0		0	0	0	0	0	0	20	10	6	0		2	9	7	12	0		1.48889
01:00:00	0	0	0	0	0	0	0	0	0	0	0	0	0	0	0	8	0	0	0	0	0	19	30	0	0	0	0	8	0	0		10	23	0	0	0	0	39	7	0	0		21	1	22	8	0		4.35556
01:30:00	0	0	0	0	0	0	3	0	0	0	0	0	1	0	0	3	31	0	0	5	0	0	23	0	0	0	0	0	0	20		0	41	0	0	0	0	33	30	10	6		62	1	0	0	0		5.97778
02:00:00	0	0	0	0	0	0	14	0	0	0	0	0	4	0	6	0	8	0	0	6	0	0	1	0	14	101	0	0	0	0		16	31	6	0	0	0	56	0	24	0		32	0	5	1	0		7.22222
02:30:00	0	0	0	0	7	0	0	0	0	0	0	0	0	0	0	0	0	0	1	13	0	6	21	0	12	0	0	0	0	0		0	6	0	0	0	0	0	12	13	38		5	0	26	14	0		3.86667
03:00:00	0	0	0	0	0	0	13	0	0	0	0	0	0	0	0	0	14	0	3	31	0	20	0	0	13	0	0	0	0	0		0	38	0	0	0	11	30	4	0	13		27	0	1	0	0		4.84444
03:30:00	0	0	0	0	0	0	8	0	0	0	0	0	0	0	0	0	0	0	0	1	0	5	36	0	47	56	0	0	0	0		18	6	0	0	10	30	3	4	1	0		27	0	20	0	0		6.04444
04:00:00	0	0	0	0	4	0	0	0	0	0	0	0	0	0	0	0	2	0	0	0	4	0	0	0	39	66	40	0	0	0		2	0	0	0	56	37	13	0	0	4		56	0	19	19	0		8.02222
04:30:00	0	0	0	0	26	0	14	0	0	0	0	0	0	0	0	0	0	0	0	7	0	0	0	0	19	0	20	0	0	3		1	0	23	0	34	7	70	12	16	23		0	0	0	32	0		6.82222
05:00:00	0	0	0	0	6	0	0	0	0	0	0	0	0	0	4	0	0	0	0	6	0	63	0	0	7	18	0	0	0	0		0	41	35	0	6	0	10	0	13	5		0	0	9	6	0		5.08889
05:30:00	0	0	0	9	42	0	0	0	0	0	0	0	0	0	0	22	0	0	18	7	0	17	0	0	0	7	36	23	10	0		21	27	0	64	51	0	48	0	37	9		21	0	0	0	0		10.4222
06:00:00	0	0	0	22	0	0	9	3	0	0	21	0	0	0	4	0	6	0	24	6	35	7	24	0	0	30	6	0	2	0		19	3	0	27	12	0	15	0	2	0		0	46	0	26	19		8.17778
06:30:00	0	0	0	3	0	8	0	6	0	0	5	0	0	0	0	0	10	0	6	13	12	19	49	50	24	74	0	0	16	39		1	27	9	0	0	4	0	0	0	0		0	53	0	0	30		10.1778
07:00:00	0	1	0	7	0	9	0	2	0	0	0	0	14	0	0	0	3	0	0	10	0	0	8	0	2	0	0	12	20	2		0	41	2	0	0	52	11	2	0	0		48	3	12	22	0		6.28889
07:30:00	0	0	0	0	26	6	0	0	0	0	0	0	0	0	0	3	18	19	0	11	0	31	0	0	45	0	16	0	23	11		0	28	11	17	20	19	37	20	0	0		0	59	0	27	12		10.2
08:00:00	0	0	0	10	0	0	27	10	0	18	17	6	0	2	2	10	12	29	29	6	37	27	43	15	9	23	23	2	14	2		2	24	33	23	39	22	39	16	14	0		0	28	22	9	45		15.3111
08:30:00	50	72	29	50	7	74	68	50	55	54	67	62	48	50	50	66	30	30	55	58	41	53	48	50	37	49	37	38	52	5		34	50	42	56	46	61	67	50	70	79		82	66	48	36	49		50.4667
09:00:00	45	44	17	35	35	63	56	51	54	40	62	59	49	42	39	33	22	41	48	47	49	42	47	38	44	45	41	26	32	20		26	59	31	43	40	69	64	40	57	48		87	71	47	40	75		45.8444
09:30:00	28	37	15	29	19	56	46	31	29	24	36	35	43	30	28	45	19	34	18	50	41	45	37	46	42	31	40	13	16	5		18	51	39	51	39	53	58	44	45	36		78	64	44	33	61		37.3778
10:00:00	22	19	11	24	9	53	34	13	21	15	15	46	24	20	25	17	12	12	5	57	44	33	31	23	30	25	29	7	29	8		13	47	21	46	31	50	36	29	41	34		39	73	47	39	48		29.0444
10:30:00	33	9	5	33	0	44	19	20	31	4	43	35	13	6	12	10	20	10	1	46	29	32	8	8	25	31	23	9	24	0		17	35	29	38	24	32	33	16	48	39		32	54	26	25	52		24.0667
11:00:00	42	3	2	19	15	34	42	10	34	0	27	27	14	0	21	6	16	13	0	32	18	36	13	16	23	20	16	0	17	6		4	40	22	26	20	50	41	4	39	22		28	43	23	32	46		21.3778
11:30:00	20	4	4	7	28	36	10	8	25	6	26	10	1	0	24	3	7	7	0	47	14	35	7	3	12	12	15	6	26	1		0	34	17	18	18	47	28	0	40	22		6	39	22	29	38		16.9333
12:00:00	16	0	0	0	4	32	4	0	6	0	25	2	10	0	17	0	2	1	0	36	9	36	0	27	9	4	10	2	8	1		0	27	16	18	22	48	25	0	8	16		4	20	19	15	22		11.5778
12:30:00	6	0	0	2	58	6	0	4	9	0	24	6	0	0	17	2	0	1	0	21	6	20	0	0	10	7	9	0	8	4		4	28	5	0	10	36	24	0	2	0		5	23	38	27	21		9.84444
13:00:00	0	0	0	0	46	1	0	0	0	0	7	0	0	0	3	34	0	0	4	7	2	10	0	13	4	8	5	0	6	11		0	19	11	0	9	19	17	6	20	0		12	19	14	23	14		7.64444
13:30:00	0	0	0	0	4	0	0	2	0	0	9	0	8	0	9	0	2	0	2	0	0	5	0	15	9	10	0	0	0	4		0	21	12	0	5	5	2	0	29	0		48	16	20	30	2		5.97778
14:00:00	1	0	0	0	21	0	8	0	6	0	0	0	0	0	2	25	0	0	8	22	0	11	0	0	12	1	0	0	0	22		0	19	13	0	0	0	0	24	5	0		28	18	17	21	22		6.8
14:30:00	0	0	0	6	7	0	0	0	0	0	2	0	2	14	0	38	0	0	5	11	0	10	0	10	0	10	0	0	0	21		0	10	3	0	0	0	0	9	0	0		28	16	13	38	0		5.62222
15:00:00	0	0	7	7	144	0	0	0	0	0	3	0	1	15	7	19	0	0	0	31	0	3	13	0	0	1	0	0	0	21		0	3	0	0	0	15	12	0	20	1		51	7	4	21	0		9.02222
15:30:00	0	0	46	5	0	0	5	0	0	0	12	0	4	25	0	29	1	0	26	26	0	2	56	0	19	2	0	0	0	4		15	2	34	0	22	67	10	16	0	21		35	15	3	33	12		12.1556
16:00:00	0	0	3	0	5	16	0	0	0	4	0	1	0	11	0	33	4	0	0	33	0	5	36	0	0	2	0	0	0	14		1	0	0	0	34	20	2	15	5	55		24	23	2	13	29		8.66667
16:30:00	0	0	1	0	19	0	53	0	0	0	0	10	26	4	1	14	4	0	18	6	0	0	60	0	8	10	0	0	0	4		0	0	5	7	27	39	18	0	0	23		5	14	0	19	17		9.15556
17:00:00	0	0	1	0	0	4	26	0	0	0	0	0	2	8	2	22	17	0	16	7	0	0	70	0	0	0	0	0	0	5		2	0	13	9	25	14	0	15	0	3		37	10	0	18	26		7.82222
17:30:00	0	0	14	0	0	0	20	0	8	0	0	14	0	9	0	6	13	0	27	20	35	0	37	0	0	0	0	0	2	10		42	0	12	0	11	8	0	14	36	3		5	18	29	10	34		9.71111
18:00:00	0	0	0	0	0	1	7	12	8	1	0	10	0	9	5	0	8	0	6	30	0	15	22	0	13	13	0	0	0	14		28	20	6	11	1	32	0	33	13	16		100	33	3	13	39		11.6
18:30:00	35	0	22	0	18	0	4	15	8	51	0	6	1	0	0	0	2	0	0	33	0	32	26	7	20	1	0	0	0	9		5	8	29	25	0	59	33	36	36	0		27	42	39	35	30		15.4222
19:00:00	28	0	5	0	0	0	3	11	26	60	23	3	7	9	0	20	10	0	0	30	7	20	4	54	11	5	0	0	0	14		9	6	16	23	46	42	56	15	14	37		22	45	23	21	33		16.8444
19:30:00	16	0	14	0	14	11	13	12	8	0	13	2	7	0	0	0	0	0	0	46	37	17	61	31	33	28	20	0	0	42		16	10	12	28	35	58	24	33	27	73		35	42	15	61	25		20.4222
20:00:00	31	0	21	2	22	68	6	4	15	22	25	0	30	0	3	9	30	16	28	50	24	28	70	32	31	13	38	33	30	23		46	18	36	29	29	55	28	46	49	75		56	61	33	36	48		29.9778
20:30:00	37	55	45	29	28	69	62	40	42	28	71	31	30	88	70	74	61	60	61	88	52	78	46	55	78	68	59	32	50	18		31	62	91	77	44	85	67	53	78	41		98	95	46	80	88		58.6889
21:00:00	0	28	0	0	7	0	5	0	0	8	1	0	0	0	2	0	7	0	13	46	0	6	25	0	9	0	1	18	2	0		0	18	33	0	18	1	37	0	23	0		0	18	3	68	2		8.86667
21:30:00	0	5	0	0	31	0	0	0	0	23	0	0	0	0	0	0	0	0	0	0	8	2	7	0	4	0	2	0	4	2		0	0	0	0	44	17	0	0	0	0		0	22	0	64	0		5.22222
22:00:00	0	0	0	0	0	0	0	0	0	14	0	13	0	0	0	0	0	0	0	0	0	10	0	0	0	0	37	10	30	4		0	0	0	0	0	0	3	0	0	0		0	1	0	29	0		3.35556
22:30:00	0	0	0	0	10	0	0	0	0	0	10	6	0	0	0	0	0	0	0	0	0	1	0	0	15	0	1	5	48	14		0	0	0	0	0	0	0	0	0	0		2	18	0	51	0		4.02222
23:00:00	0	0	0	0	2	0	0	0	0	0	18	0	19	0	0	0	0	0	0	11	0	0	0	0	0	0	10	0	24	6		0	0	0	0	0	10	0	3	0	0		0	1	0	0	0		2.31111
23:30:00	0	0	0	0	0	1	0	13	0	0	6	0	8	0	0	0	0	0	0	41	12	17	0	0	25	0	12	0	26	2		0	0	0	0	2	8	0	0	0	0		0	5	0	71	0		5.53333
00:00:00	0	0	0	0	19	0	0	0	0	0	13	0	0	0	0	0	26	0	0	8	0	0	0	0	41	0	0	0	8	4		0	0	0	0	13	18	0	11	0	0		0	4	0	42	0		4.6
00:30:00	0	0	0	0	0	0	15	3	0	0	1	0	0	0	1	0	7	0	0	12	0	0	0	0	5	0	1	0	17	4		0	0	0	0	22	26	0	14	0	0		0	15	0	0	0		3.17778
01:00:00	0	0	0	0	5	0	16	2	0	0	2	0	0	0	5	0	16	0	0	1	6	1	3	0	0	0	41	0	43	9		0	0	0	0	16	0	0	22	0	0		0	0	0	48	0		5.24444
01:30:00	0	0	0	0	41	0	0	10	0	0	0	0	0	0	2	0	0	0	0	34	0	8	71	0	0	0	1	0	26	4		0	0	0	0	16	0	0	24	0	0		11	4	0	34	0		6.35556
02:00:00	0	0	0	21	19	0	18	5	0	0	10	0	0	0	0	0	0	0	0	75	0	2	85	0	0	0	0	0	14	3		0	0	0	0	0	6	0	12	0	0		0	14	0	15	0		6.64444
02:30:00	0	0	0	11	0	0	27	7	0	0	6	0	0	0	0	0	14	0	0	3	0	0	54	0	0	0	0	0	2	12		6	0	0	0	0	1	0	5	0	0		0	10	0	9	0		3.71111
03:00:00	0	0	0	0	0	0	29	0	0	0	0	0	0	0	10	0	6	1	37	16	9	15	11	0	0	0	0	0	12	12		0	0	0	0	0	0	0	0	0	0		0	0	0	0	0		3.51111
03:30:00	0	7	0	0	0	0	0	0	0	0	0	0	6	0	0	0	0	1	0	0	0	0	11	0	0	0	6	0	0	16		0	0	0	0	2	0	0	11	0	0		0	5	19	23	0		2.37778
04:00:00	0	32	0	0	0	0	42	0	0	0	0	0	0	0	0	0	0	4	0	24	0	0	15	0	0	0	4	0	0	19		0	0	0	0	0	0	63	27	0	0		0	2	4	29	0		5.88889
04:30:00	0	0	0	0	0	0	0	0	0	0	0	0	0	0	4	0	24	12	0	85	0	0	0	0	4	0	0	6	0	30		0	0	0	0	0	0	43	2	19	0		0	0	16	40	0		6.33333
05:00:00	0	0	0	0	0	0	0	0	0	0	0	0	4	0	0	0	0	9	0	0	0	14	0	0	40	0	0	19	0	9		0	0	0	0	2	0	41	0	16	0		0	5	16	51	45		6.02222
05:30:00	0	0	0	0	0	0	0	6	0	0	0	0	5	0	0	0	25	2	0	16	0	19	0	0	10	25	0	27	0	5		0	0	0	0	2	20	34	0	31	0		28	29	0	38	44		8.13333
06:00:00	0	0	0	0	0	0	0	0	0	0	13	0	0	0	0	0	8	0	1	0	16	25	18	5	5	152	0	0	7	9		7	41	3	16	26	36	0	20	0	0		103	36	13	43	35		14.1778
06:30:00	0	6	0	35	0	21	7	10	0	3	0	10	2	0	5	4	0	8	15	8	11	23	47	0	0	77	44	0	4	1		13	48	3	16	50	38	49	2	0	17		65	50	0	21	0		15.8444
07:00:00	0	3	0	4	0	29	0	0	11	12	0	0	0	0	0	0	9	0	0	17	7	6	18	0	0	15	4	0	24	0		28	36	56	67	41	35	45	2	0	26		64	30	16	26	0		14.0222
07:30:00	0	3	0	7	0	0	0	0	8	0	31	0	21	0	0	0	10	2	0	15	12	4	42	8	20	14	0	0	0	0		0	18	28	35	18	28	38	19	0	14		48	29	10	45	45		12.7111
08:00:00	29	0	0	9	0	0	7	27	10	0	0	0	5	3	2	5	19	13	47	12	15	19	16	23	16	24	15	0	11	0		0	13	25	11	16	37	46	12	32	63		15	42	17	30	29		15.8889
[truncated: 210 more columns]

## Sheet: Fig 6 S1 A (ND)
FED(W+ VDRC)	M24-11.7																M7-11.10																M19 1207
20:30:00	79	72	90	57	60	84	93	161	85	76	106	77	105	69	109	82	64	64	70	171	54	98	66	56	71	52	69	86	77	74	77	73	55	52	36	54	75	89	79	20	68	71	84	92	68	101	72	84
21:00:00	61	134	40	67	21	43	101	130	65	20	56	59	82	78	51	54	38	59	48	37	19	59	53	39	62	53	77	61	97	50	66	50	25	8	0	19	40	54	63	53	52	57	73	70	77	23	47	6
21:30:00	57	21	13	11	8	16	32	22	13	0	22	50	66	38	0	3	24	4	25	14	13	79	5	14	81	32	48	51	51	8	43	29	4	8	1	4	5	35	59	60	16	57	24	68	17	12	34	0
22:00:00	14	5	7	0	15	4	7	13	12	0	21	33	43	6	0	0	9	0	10	6	0	26	19	39	36	42	26	16	33	6	4	5	6	0	0	15	0	28	20	26	6	36	4	36	0	0	5	4
22:30:00	16	0	7	0	0	0	9	1	7	0	7	5	6	1	0	5	6	0	4	0	1	0	136	5	91	8	33	0	12	2	6	0	2	0	2	0	4	12	0	35	13	0	0	0	49	51	10	0
23:00:00	1	0	2	0	0	0	14	0	6	0	24	0	11	0	10	24	0	0	21	2	0	0	68	0	43	11	7	0	2	11	78	3	0	0	9	0	0	25	39	23	0	0	0	0	0	44	1	0
23:30:00	51	0	0	0	0	0	7	0	2	20	47	52	0	0	3	4	17	0	58	1	0	20	14	9	0	52	15	0	0	0	11	7	0	0	2	44	0	8	1	2	14	0	0	0	0	0	9	0
00:00:00	7	0	4	3	0	40	3	0	53	1	4	15	0	0	0	1	7	0	3	0	0	29	11	21	11	8	37	0	0	4	1	36	0	0	0	20	23	64	10	3	31	22	0	0	0	0	37	0
00:30:00	0	0	3	0	0	37	7	0	5	7	3	0	73	0	1	52	46	0	0	0	44	12	7	0	27	0	13	0	9	28	0	66	0	0	0	0	2	36	32	0	32	71	0	0	0	0	0	0
01:00:00	1	0	26	34	0	24	88	0	0	1	1	0	40	0	0	67	57	0	17	0	42	0	0	0	9	0	34	0	37	42	78	33	0	0	0	0	6	63	0	31	0	15	0	0	0	1	0	0
01:30:00	28	15	7	32	0	4	72	0	0	8	0	0	9	0	0	2	56	0	50	0	25	45	1	0	25	0	27	0	35	8	62	0	0	0	0	0	3	16	0	16	15	0	0	0	0	0	11	70
02:00:00	58	34	28	2	0	22	65	2	0	11	84	0	44	0	0	0	42	0	0	0	1	20	6	7	0	35	16	0	31	0	63	0	0	0	0	36	7	0	0	0	0	22	0	0	0	0	52	7
02:30:00	0	0	71	0	0	5	51	0	0	4	37	33	14	3	0	23	25	0	0	0	0	32	3	37	13	0	1	0	2	0	40	39	0	0	0	25	3	52	0	27	0	34	0	0	0	0	68	1
03:00:00	0	18	60	0	44	2	14	0	17	13	17	49	24	0	0	52	30	0	64	0	0	11	0	2	23	13	0	0	0	0	2	61	0	0	0	3	6	3	0	0	0	0	0	0	0	0	52	0
03:30:00	0	91	43	0	0	6	0	0	15	8	26	70	38	0	1	0	59	0	33	0	1	0	0	0	12	10	0	0	0	5	12	47	44	0	0	0	1	38	0	0	0	0	0	0	0	0	0	0
04:00:00	0	130	0	90	0	20	0	0	25	4	38	10	47	0	0	0	22	0	43	0	0	0	0	30	11	0	0	0	27	31	4	20	28	41	18	0	2	62	0	0	0	0	0	0	0	0	0	0
04:30:00	0	9	0	55	0	35	0	0	64	54	16	0	40	0	0	0	33	0	80	0	44	39	0	0	0	0	77	0	49	0	77	50	0	80	58	0	6	13	0	36	0	0	0	0	49	0	52	63
05:00:00	0	47	0	33	0	16	0	0	32	63	0	0	4	0	0	0	0	0	0	0	41	22	0	0	0	0	23	0	31	0	48	27	0	31	0	36	14	55	69	85	0	0	0	18	26	26	61	10
05:30:00	0	0	0	1	11	35	0	0	32	26	0	0	0	9	6	0	0	0	0	0	48	0	0	0	29	0	0	0	0	0	51	28	0	0	0	45	0	9	23	73	0	0	0	137	0	100	59	0
06:00:00	65	0	0	0	29	61	2	0	9	0	0	0	0	42	1	10	0	0	0	6	17	0	72	0	32	0	0	0	0	0	84	22	22	0	0	0	0	59	8	10	0	0	0	75	0	6	10	0
06:30:00	47	0	36	0	9	25	37	0	11	0	0	40	0	20	53	42	0	7	0	0	0	0	65	0	0	18	44	0	0	0	35	21	22	0	0	0	0	25	0	0	0	0	0	6	0	0	0	0
07:00:00	18	0	63	0	0	0	55	0	83	0	0	54	0	0	14	17	0	0	0	0	0	0	36	0	0	46	26	0	0	42	16	1	5	0	0	0	0	12	0	5	54	1	0	0	0	0	39	0
07:30:00	48	0	20	38	0	0	53	0	60	9	0	15	10	0	0	6	24	0	0	0	0	0	3	0	0	33	0	0	67	8	10	0	3	0	22	0	0	25	0	0	19	71	0	0	0	0	71	0
08:00:00	38	0	36	66	0	44	54	38	64	87	12	1	67	0	0	14	87	19	25	6	0	63	0	12	0	4	25	0	71	0	8	47	10	1	54	43	0	61	0	13	0	55	0	0	0	0	0	0
08:30:00	44	61	82	48	61	76	84	115	60	66	78	58	46	57	85	57	66	40	90	76	32	43	50	53	73	54	46	68	56	54	117	49	80	65	79	67	63	46	74	75	95	64	65	60	65	87	78	77
09:00:00	39	61	51	63	26	69	106	78	43	89	36	36	37	51	64	74	57	46	69	57	55	53	62	49	49	38	48	70	47	23	60	39	61	48	73	60	65	56	48	54	84	57	54	59	59	59	74	70
09:30:00	32	49	60	62	57	69	106	64	49	48	28	35	33	37	59	59	37	44	50	46	17	49	44	48	58	17	47	62	34	27	60	31	42	49	65	47	51	58	48	0	105	54	64	59	62	60	59	67
10:00:00	35	47	45	50	50	57	86	88	45	34	29	30	19	42	46	39	39	53	67	44	22	55	24	46	50	4	41	59	36	26	59	63	38	59	54	42	60	55	42	18	33	43	102	31	58	57	37	73
10:30:00	50	70	60	46	19	33	67	94	45	33	24	19	20	29	35	55	14	31	40	39	12	46	36	42	43	21	39	37	23	4	71	38	36	57	55	35	48	65	45	23	47	37	51	53	41	54	44	66
11:00:00	39	58	59	30	12	17	68	80	26	36	0	11	16	31	11	54	12	6	44	35	26	62	3	47	53	0	32	22	27	7	44	13	43	64	58	31	38	75	46	30	33	43	50	40	36	48	26	46
11:30:00	30	53	55	38	18	1	43	68	19	34	26	28	30	15	27	37	2	21	40	21	2	29	3	43	33	0	37	11	21	21	34	18	37	52	65	16	57	84	39	19	28	37	47	61	22	51	27	58
12:00:00	16	53	42	13	49	4	23	63	23	75	5	4	8	8	11	49	12	3	16	12	0	13	1	33	23	0	20	4	3	5	11	14	27	48	58	13	35	84	48	33	32	29	50	39	24	43	17	42
12:30:00	98	40	41	0	27	0	18	66	5	21	0	7	33	4	6	27	27	0	45	2	0	12	41	25	42	0	24	0	4	1	0	0	19	44	48	2	34	75	48	46	21	30	58	63	10	25	3	16
13:00:00	42	14	21	0	8	0	15	19	0	24	0	5	0	3	0	8	1	0	23	4	22	0	8	17	13	0	9	0	33	0	35	30	0	45	31	2	33	67	40	22	13	16	23	38	2	0	0	8
13:30:00	73	7	0	1	1	0	2	4	0	68	0	5	0	0	0	17	2	0	16	0	24	4	1	6	2	0	5	0	0	0	2	8	0	20	36	0	2	59	22	24	6	7	9	11	4	2	2	6
14:00:00	29	10	1	0	0	0	8	3	0	14	0	0	0	0	0	10	28	0	15	0	0	0	41	6	0	0	5	0	0	0	1	1	0	39	12	1	5	36	19	8	27	3	8	10	6	17	0	11
14:30:00	9	2	0	0	0	1	28	4	0	19	0	9	0	0	0	23	37	2	27	0	0	1	1	0	0	34	3	0	0	0	0	6	0	24	9	0	3	23	40	17	30	45	1	4	0	44	0	7
15:00:00	2	1	17	0	0	0	10	15	0	0	2	9	0	4	0	80	9	10	17	0	0	7	20	0	0	3	2	0	0	4	0	39	0	11	17	0	1	18	18	52	15	2	28	3	28	0	1	64
15:30:00	4	4	33	0	4	0	0	8	0	3	34	0	0	0	0	1	37	0	8	1	45	0	4	0	0	0	0	0	0	13	23	24	14	3	7	0	7	26	33	19	38	0	54	4	29	0	2	9
16:00:00	3	6	12	0	0	3	14	0	0	7	32	14	0	10	0	24	19	21	9	0	27	2	13	1	0	0	0	0	0	0	2	34	51	0	4	0	5	27	5	58	9	0	3	1	39	24	0	12
16:30:00	0	2	1	0	0	21	38	0	0	41	11	3	0	0	0	1	1	21	14	0	10	2	39	1	0	0	0	0	0	0	0	18	26	12	6	0	20	23	7	24	20	0	1	3	12	37	37	14
17:00:00	2	16	37	0	55	42	65	72	60	35	33	37	63	6	40	0	39	0	63	0	16	0	32	24	0	0	55	1	0	0	0	26	25	14	5	0	3	13	0	15	9	0	0	2	22	0	0	7
17:30:00	0	3	12	0	0	5	21	0	12	11	3	2	40	8	20	0	12	6	3	0	14	0	29	0	0	0	4	0	0	34	0	27	24	33	3	0	16	8	8	5	1	0	0	0	3	6	11	54
18:00:00	3	4	11	0	0	5	30	3	7	1	10	11	14	44	0	0	19	0	30	0	39	14	22	6	0	0	5	0	1	12	1	39	15	6	12	0	12	9	3	70	8	0	9	3	0	21	2	19
18:30:00	1	10	19	0	3	21	37	1	5	14	8	15	12	18	0	0	31	99	12	1	28	39	12	2	0	0	12	0	5	28	51	45	44	32	22	0	31	18	11	29	17	0	7	9	22	21	11	23
19:00:00	13	14	36	0	5	22	46	31	38	38	8	20	25	23	11	48	20	3	39	5	24	22	14	20	4	38	9	10	43	22	34	30	21	20	18	3	40	31	17	40	5	0	6	4	27	48	63	25
19:30:00	22	39	35	3	20	71	74	22	33	15	37	29	35	21	16	15	26	5	36	10	30	29	20	33	47	33	22	17	24	21	31	28	35	25	28	31	30	38	14	39	25	2	28	9	7	53	24	24
20:00:00	73	79	51	0	25	28	73	39	39	49	45	14	31	24	24	27	42	18	36	29	37	28	26	12	35	18	62	49	26	26	35	33	33	28	31	21	30	39	23	49	26	12	32	18	14	47	53	40
20:30:00	73	78	109	29	66	82	119	154	99	69	75	64	80	80	90	62	81	57	107	84	53	87	64	79	90	57	79	109	84	82	92	91	75	64	60	52	64	102	79	95	61	57	62	74	67	82	82	81
21:00:00	62	106	76	0	52	69	62	107	78	67	61	56	67	44	40	40	48	41	71	62	25	84	34	47	66	41	82	96	57	56	66	56	55	40	14	22	48	98	82	89	26	29	69	67	56	47	73	30
21:30:00	37	44	65	0	16	46	13	4	30	36	46	40	37	28	7	95	50	71	28	25	0	33	36	20	58	29	49	73	37	29	55	62	32	2	0	9	9	26	31	74	9	29	44	11	7	28	52	2
22:00:00	11	15	0	0	0	2	11	0	12	18	8	50	105	0	0	3	25	1	8	4	12	22	20	3	46	13	6	0	4	21	15	60	0	0	0	4	0	12	3	53	5	24	0	4	0	9	2	0
22:30:00	0	6	12	0	0	0	6	0	3	0	0	13	24	0	0	0	7	0	0	6	0	59	37	0	60	0	2	25	16	86	30	46	0	0	0	11	0	19	25	51	11	2	0	0	0	0	37	0
23:00:00	13	29	0	0	0	0	9	0	1	0	6	0	12	0	0	0	18	0	0	3	17	14	0	0	43	0	7	0	0	0	38	20	0	7	0	1	0	2	0	65	1	6	0	0	14	0	2	0
23:30:00	3	0	7	0	0	0	0	0	16	0	0	0	67	0	0	0	40	0	0	3	0	5	0	0	35	0	0	0	0	0	52	45	0	34	0	0	0	3	1	57	0	0	0	0	0	11	0	0
00:00:00	5	4	0	0	0	0	0	0	9	19	0	0	31	0	0	0	14	0	48	25	0	8	46	0	31	0	0	0	13	0	1	43	0	0	0	0	0	22	6	11	0	0	0	0	8	7	16	0
00:30:00	8	28	0	0	0	0	9	0	23	25	28	0	10	0	0	0	14	0	0	30	0	14	4	0	0	0	13	0	0	0	4	34	0	0	6	34	0	20	11	40	1	0	0	7	27	0	28	0
01:00:00	11	12	0	5	0	0	1	0	38	0	0	0	20	0	0	11	0	0	24	0	0	0	25	0	0	2	22	0	5	36	67	19	0	0	4	0	0	16	0	33	0	0	0	41	0	0	33	0
01:30:00	35	2	0	0	0	15	73	0	30	8	13	21	42	4	0	39	6	0	35	0	0	0	35	0	27	18	66	0	14	29	53	30	0	0	40	21	0	3	1	31	18	0	0	54	0	1	31	0
02:00:00	37	0	0	0	0	12	18	91	32	26	60	14	35	0	0	0	179	36	0	2	38	62	31	0	106	0	28	0	21	0	53	0	0	0	15	0	0	40	50	5	30	0	25	18	0	65	15	0
02:30:00	55	22	0	0	0	10	54	5	13	0	0	44	36	0	0	0	61	1	14	0	45	24	16	0	12	0	16	0	11	0	21	0	0	4	0	0	0	34	1	47	0	0	11	12	0	20	0	0
03:00:00	27	139	0	0	0	6	24	0	0	0	0	0	26	0	88	0	31	0	0	43	47	0	0	0	0	0	116	0	25	25	0	0	0	67	0	28	36	37	3	3	0	0	14	0	0	31	21	0
03:30:00	11	40	1	7	6	57	28	20	18	8	0	0	0	0	78	0	19	0	0	4	43	0	0	0	0	4	7	0	7	11	0	48	0	28	14	0	8	4	14	0	0	0	29	9	0	0	38	0
04:00:00	16	0	0	0	0	37	9	0	9	0	38	24	0	0	0	0	0	0	39	0	8	0	21	0	0	22	7	0	20	0	0	37	0	10	1	15	0	12	0	0	0	0	41	3	0	0	8	0
04:30:00	0	0	43	15	0	0	0	0	0	0	20	3	0	0	0	0	0	0	8	0	0	53	0	9	0	33	24	0	4	0	27	34	35	0	0	9	0	1	11	21	10	18	34	9	0	0	36	0
05:00:00	0	0	46	11	0	0	0	0	0	0	0	18	0	0	0	36	36	0	136	0	0	48	0	51	0	6	0	0	54	0	68	47	17	0	0	0	0	33	0	3	32	31	0	8	0	0	4	0
05:30:00	0	0	47	10	0	0	0	0	15	0	0	0	0	0	0	16	8	0	4	45	0	45	0	32	0	9	0	1	37	0	39	0	18	0	2	0	0	28	0	30	0	25	0	0	0	0	0	0
06:00:00	0	0	39	79	0	0	0	0	17	0	8	2	33	0	0	0	5	0	0	24	0	10	0	0	0	37	50	0	0	0	11	31	20	0	13	43	0	13	0	3	4	9	0	0	0	0	0	25
06:30:00	0	0	34	48	0	0	0	1	20	0	0	41	47	0	0	0	0	0	96	0	0	32	0	0	0	13	0	0	0	16	13	60	0	12	10	35	44	14	52	0	10	0	0	0	0	0	40	34
07:00:00	0	0	1	38	0	0	0	53	4	7	0	18	42	0	0	0	0	6	73	0	0	29	29	19	25	0	7	0	34	0	36	40	0	41	22	0	40	2	12	0	0	26	0	0	0	1	20	0
07:30:00	46	0	0	44	0	0	34	18	0	19	5	10	0	0	0	0	0	19	40	0	0	2	48	0	11	14	22	0	40	30	45	18	0	10	4	14	6	31	12	0	0	28	17	43	0	0	0	0
08:00:00	35	36	19	21	0	0	25	2	0	0	36	6	19	0	14	24	29	10	0	9	0	31	61	0	0	0	0	24	21	1	39	0	0	0	0	21	0	29	13	0	10	31	79	54	0	0	0	0
08:30:00	44	49	72	41	64	63	82	76	52	53	36	48	45	86	77	69	39	29	63	52	63	53	39	61	54	48	58	111	61	65	80	31	54	42	55	43	50	74	57	84	57	50	47	58	60	76	56	66
09:00:00	43	40	61	36	52	54	81	83	54	27	45	33	30	37	48	66	27	60	42	38	50	36	20	30	67	26	41	63	41	26	56	20	54	54	53	43	47	70	42	83	48	42	54	41	45	43	40	57
09:30:00	44	41	74	32	40	31	86	69	41	34	28	25	24	31	33	57	27	33	37	36	45	39	19	30	51	17	37	46	28	15	58	36	46	60	57	67	29	73	44	106	36	51	40	35	47	51	50	55
10:00:00	37	37	72	28	37	36	100	46	28	25	21	28	18	23	24	61	29	20	29	26	28	41	26	25	59	17	39	37	26	18	59	38	38	78	45	41	24	78	41	87	32	39	61	27	31	48	38	56
10:30:00	41	31	65	27	33	14	77	50	11	46	19	32	29	15	28	46	41	19	22	11	32	29	18	23	41	12	31	17	10	7	54	58	34	76	42	48	27	80	31	80	27	55	36	36	26	42	30	60
11:00:00	27	27	67	29	0	10	60	45	8	25	17	12	40	23	17	35	39	21	8	23	45	41	22	14	45	16	30	6	22	2	74	22	16	67	45	31	27	77	39	91	25	74	28	38	37	52	44	47
11:30:00	23	25	46	30	18	8	33	54	3	22	2	9	19	26	12	40	24	15	35	12	31	25	9	15	36	1	19	1	7	23	43	17	19	61	48	14	26	89	43	52	23	44	29	51	30	38	27	38
12:00:00	8	16	29	16	3	0	19	51	2	16	9	2	18	4	0	33	29	5	5	5	42	0	102	18	53	0	23	1	10	0	42	4	12	43	37	14	9	79	47	10	26	53	10	30	21	36	14	40
12:30:00	0	7	36	0	8	0	10	5	13	21	3	3	1	8	1	13	6	11	13	2	16	0	16	15	38	4	24	0	3	1	18	3	1	30	28	12	2	73	45	53	47	30	12	29	10	31	13	29
13:00:00	21	6	12	0	4	0	10	2	0	0	0	0	0	7	3	38	0	0	0	0	15	4	8	18	33	0	12	0	0	3	12	0	0	19	26	13	0	52	28	74	33	21	1	12	0	8	2	8
13:30:00	75	4	1	0	0	6	2	4	0	0	8	0	0	2	0	10	9	0	0	1	2	0	12	2	18	0	8	0	0	0	16	9	0	2	7	4	0	44	18	67	13	3	11	7	0	0	2	4
14:00:00	14	14	0	0	43	0	0	0	0	0	5	5	0	0	0	0	11	0	0	1	6	0	0	5	5	9	2	2	0	0	1	1	0	0	1	0	4	41	6	9	7	1	1	9	0	5	0	3
14:30:00	7	2	12	0	23	0	0	0	0	0	4	0	0	4	0	0	18	0	0	0	4	0	12	1	9	0	2	58	0	31	24	0	0	1	2	9	0	19	5	42	2	0	11	0	0	1	0	35
15:00:00	19	0	8	0	14	0	0	0	0	0	0	0	0	2	0	0	9	0	0	0	9	0	9	0	5	0	0	0	0	21	7	1	0	10	3	0	0	14	0	56	20	0	7	0	0	0	1	22
15:30:00	11	0	0	0	27	0	0	0	0	0	0	0	0	13	0	0	26	31	62	54	54	1	43	22	44	83	54	27	42	56	99	57	1	9	9	0	0	8	0	60	8	0	48	1	0	0	4	2
16:00:00	1	0	0	0	41	0	8	0	0	0	1	0	0	1	0	8	14	0	0	0	0	0	1	0	2	0	0	0	0	1	22	0	11	0	2	0	14	3	0	64	1	11	0	3	0	5	39	16
16:30:00	0	5	0	0	8	0	33	0	0	0	1	0	16	14	0	19	10	0	0	0	1	3	0	0	0	1	0	0	0	0	19	2	29	3	0	0	1	4	0	13	49	0	0	0	0	0	11	8
17:00:00	0	10	0	0	12	0	14	0	0	0	8	0	34	30	0	0	25	0	37	1	17	0	2	16	0	13	22	0	0	13	42	31	11	0	6	0	7	6	0	44	1	0	8	2	0	0	16	4
17:30:00	0	27	0	0	4	4	13	0	0	12	10	0	24	5	0	0	53	0	59	0	45	37	36	14	2	9	25	0	0	0	15	25	11	0	4	0	20	15	1	39	5	4	2	2	0	0	28	4
18:00:00	0	22	31	0	73	0	38	1	0	0	20	0	12	10	0	6	21	1	35	0	53	22	21	9	29	20	11	1	7	29	12	20	31	2	23	0	8	31	0	48	6	4	18	2	0	20	8	9
18:30:00	0	22	41	1	20	48	58	7	2	28	43	1	27	13	0	7	32	0	19	0	31	10	17	19	36	3	11	2	16	8	14	33	39	38	22	0	18	33	36	47	24	18	16	26	0	41	31	29
19:00:00	17	33	30	0	32	33	45	13	18	117	22	15	37	19	10	9	17	1	18	0	31	16	28	3	34	8	0	8	4	17	14	21	28	30	6	1	18	30	20	42	22	5	34	10	0	41	43	16
19:30:00	13	38	49	11	40	32	68	57	52	105	42	28	35	16	51	54	32	0	41	0	20	29	18	16	45	10	12	8	10	25	15	39	37	31	16	35	32	53	6	48	25	11	25	28	0	31	22	26
20:00:00	19	57	58	23	61	48	73	54	64	25	50	33	62	26	58	43	40	8	36	7	44	48	32	10	26	23	23	35	33	57	55	38	48	71	31	23	19	61	42	55	39	23	25	26	41	39	35	41
20:30:00	73	62	98	76	104	96	119	142	80	60	87	80	95	77	112	70	81	45	69	90	51	103	65	70	96	58	88	108	84	67	63	83	87	87	84	59	61	120	96	97	57	67	78	78	43	105	55	83
21:00:00	53	59	6	61	47	58	69	146	52	107	61	59	81	115	78	25	54	24	67	42	35	74	42	36	92	31	70	101	62	49	45	67	32	78	28	43	48	114	83	49	36	45	95	55	13	70	109	85
21:30:00	27	42	10	34	7	32	24	1	30	124	36	49	68	69	16	17	39	94	26	14	16	30	11	3	61	93	32	31	49	34	23	41	6	6	12	31	30	55	44	23	16	28	42	28	20	26	55	2
22:00:00	8	8	5	29	1	0	14	0	10	31	15	45	42	13	0	1	2	2	11	0	0	10	3	0	39	1	3	0	13	17	12	50	0	24	6	10	0	8	12	28	0	26	30	6	46	10	27	0
22:30:00	2	0	0	23	0	0	84	0	0	0	6	28	45	0	0	0	10	3	1	0	2	0	1	0	24	23	0	0	0	1	19	38	0	21	11	0	0	15	1	9	8	11	1	2	1	16	2	3
23:00:00	0	0	0	0	0	0	42	7	3	0	3	1	44	2	0	0	13	0	0	0	0	0	0	0	0	28	0	0	0	0	9	35	14	6	20	69	0	8	9	35	3	1	0	1	3	23	24	0
23:30:00	11	17	0	0	0	0	0	1	2	0	2	2	49	0	0	0	2	14	24	0	0	0	0	0	0	24	0	0	6	80	10	53	35	26	21	7	0	0	5	102	0	0	0	34	35	6	70	0
00:00:00	24	30	0	0	0	1	0	4	23	0	0	0	18	0	0	0	5	8	0	7	0	25	13	48	0	29	0	2	29	35	0	34	21	29	8	0	0	7	0	24	0	0	0	15	0	52	12	0
00:30:00	0	0	24	0	0	4	0	2	31	0	0	0	50	0	0	0	33	16	56	19	0	12	22	24	0	0	0	0	15	0	0	17	0	7	36	7	0	10	1	9	0	0	2	0	0	54	7	0
01:00:00	0	28	0	0	0	0	0	1	10	0	0	0	21	0	0	0	41	12	37	0	29	0	0	0	60	18	0	1	6	1	34	27	2	30	39	13	10	8	0	51	0	0	10	37	0	24	47	0
01:30:00	0	25	0	0	0	0	0	1	36	0	0	54	45	32	0	0	52	0	0	12	0	0	0	0	57	0	43	0	27	12	75	15	0	54	23	2	41	33	15	71	0	0	3	11	0	43	35	0
02:00:00	0	2	35	0	0	0	0	24	19	0	26	2	37	44	0	0	30	32	33	0	3	0	0	0	41	17	2	0	19	0	27	45	19	36	8	31	20	61	20	38	7	0	40	47	0	57	0	0
02:30:00	0	7	8	0	0	0	8	0	0	0	5	0	53	28	0	0	14	0	18	0	15	0	0	0	1	13	3	0	0	0	10	23	0	17	8	23	0	43	48	21	35	4	47	21	0	45	0	0
03:00:00	35	13	2	0	0	0	69	0	0	0	2	0	4	0	0	28	40	0	0	4	0	0	0	0	0	0	0	0	25	0	0	17	29	0	10	2	3	18	27	60	2	3	33	0	32	8	16	26
03:30:00	27	31	7	0	0	0	53	3	10	0	0	7	0	6	0	32	0	1	0	0	35	0	0	36	0	0	0	0	19	0	0	6	7	0	21	0	46	57	12	23	0	0	0	34	14	0	13	19
04:00:00	0	0	0	0	0	0	0	8	6	0	0	36	0	0	0	12	6	0	0	0	24	34	0	31	54	0	28	0	0	0	0	25	11	0	17	0	12	9	10	10	1	0	0	9	0	0	0	28
04:30:00	0	0	0	0	0	0	0	4	0	0	0	30	0	0	0	0	31	0	72	0	0	2	0	0	7	18	40	0	0	0	0	102	0	13	12	0	0	0	211	18	17	0	0	0	0	0	0	12
05:00:00	20	0	43	0	0	0	0	3	10	0	0	0	0	0	0	0	7	7	36	0	0	0	18	0	0	39	11	0	0	0	60	4	15	35	0	0	0	17	20	4	22	18	11	37	0	0	3	36
05:30:00	50	23	38	0	0	0	0	0	0	0	0	24	0	0	0	0	10	0	2	0	0	0	19	0	0	13	0	0	32	0	49	0	6	0	0	62	0	7	33	0	0	25	27	5	0	0	69	17
06:00:00	0	0	12	0	0	0	0	39	0	0	23	40	0	0	0	0	0	23	0	24	0	42	20	0	0	7	0	0	36	24	29	0	5	16	0	35	10	6	6	0	0	5	88	32	0	15	12	0
06:30:00	0	20	0	0	0	0	0	0	14	0	21	6	0	5	36	0	0	0	34	0	0	73	0	0	0	0	12	19	0	4	63	50	5	1	0	35	27	18	16	0	31	20	5	23	7	66	95	0
07:00:00	16	47	0	0	0	0	0	0	0	51	20	0	0	37	0	0	22	3	21	0	41	28	0	0	0	0	26	0	0	0	0	39	0	0	0	6	0	24	32	0	14	39	19	23	26	3	4	19
07:30:00	78	38	0	0	1	0	0	0	0	0	18	28	0	0	0	0	0	53	17	10	16	0	0	10	0	24	10	102	0	0	0	49	20	0	0	25	0	22	1	0	20	0	38	38	0	0	0	0
08:00:00	23	8	16	0	45	0	0	24	48	0	4	58	0	1	0	33	0	38	2	6	5	64	0	12	31	5	0	8	24	0	0	24	0	3	12	9	0	30	43	38	24	15	13	28	0	1	35	24
[truncated: 55 more columns]

## Sheet: Fig 6 S1 B (Rap)
FED(W+ VDRC)	M15-1.26																M51-1.26																M54-1.26																M43-1.25
20:30:00	83	98	87	69	48	91	75	69	58	67	86	61	80	108	53	72	67	71	61	88	76	34	119	92	101	74	74	87	111	45	70	56	65	103	76	62	81	127	76	125	108	106	85	115	127	72	74	77	84
21:00:00	66	59	92	71	63	113	80	51	61	62	83	62	44	114	56	83	55	75	52	64	83	2	111	109	61	38	73	55	82	43	25	22	41	96	83	69	59	93	81	67	114	74	101	111	145	64	84	94	59
21:30:00	82	34	48	42	62	55	71	50	60	67	107	56	31	42	45	41	0	60	71	13	95	0	23	5	8	0	25	17	96	37	4	6	9	110	83	25	5	44	70	25	51	50	38	102	158	49	46	36	21
22:00:00	58	0	0	1	29	13	20	39	53	4	39	39	8	5	33	22	0	3	35	0	56	0	4	0	0	6	9	0	52	13	0	20	6	58	23	0	0	21	15	8	6	59	7	84	143	14	35	0	29
22:30:00	30	0	6	0	4	0	9	12	9	1	34	0	5	0	49	1	0	0	1	16	43	0	0	0	0	0	8	0	36	15	0	0	0	8	2	0	0	0	2	2	18	3	10	40	126	0	17	0	0
23:00:00	32	0	1	0	0	27	7	18	8	0	5	0	1	0	27	0	0	0	15	0	0	0	0	0	0	0	2	0	16	14	0	0	0	9	0	0	26	0	43	3	16	0	0	6	96	0	0	0	22
23:30:00	27	0	3	0	13	22	1	14	13	9	29	3	0	0	17	0	0	0	1	0	47	0	0	0	0	12	0	7	58	19	0	26	0	8	0	0	1	3	22	3	4	14	0	7	102	0	42	0	4
00:00:00	25	0	2	0	35	24	1	23	0	36	26	1	20	0	6	0	0	0	3	0	4	12	0	0	0	2	0	10	27	23	0	13	0	44	0	0	0	20	0	2	7	0	0	0	24	0	2	0	34
00:30:00	24	0	0	0	25	46	11	14	0	11	64	0	20	0	8	0	0	0	0	36	0	11	0	1	0	0	0	0	47	6	0	24	0	104	1	0	0	9	0	0	13	0	9	1	59	0	6	0	3
01:00:00	1	0	51	0	0	0	1	20	0	0	21	0	6	0	0	0	0	0	32	0	63	2	42	0	0	0	0	0	22	1	0	0	0	41	0	0	0	12	0	54	0	0	58	2	14	0	0	0	9
01:30:00	20	0	13	0	10	11	6	28	0	0	31	1	0	0	0	0	0	0	0	0	0	0	0	0	0	0	52	0	53	0	0	0	32	49	0	0	0	8	0	0	0	5	12	1	0	14	0	0	45
02:00:00	15	0	0	0	0	0	0	15	0	0	13	0	32	0	0	0	0	0	1	0	80	0	37	0	0	0	0	0	0	0	0	25	0	8	0	0	0	82	0	1	0	50	0	0	0	15	0	2	1
02:30:00	14	0	0	0	0	20	0	27	0	6	5	0	12	0	0	0	0	1	0	0	49	11	17	0	0	1	0	0	0	0	0	2	19	58	0	0	0	0	0	4	0	3	0	1	0	0	0	0	58
03:00:00	0	0	0	0	0	6	16	10	0	39	40	0	4	0	0	0	0	0	0	39	2	0	27	1	0	0	0	0	28	12	0	0	0	1	0	0	0	0	0	0	0	0	0	0	78	0	0	0	21
03:30:00	40	0	0	0	0	4	0	5	0	0	25	0	0	0	0	0	0	0	0	46	0	0	1	0	0	0	0	0	108	16	0	0	0	1	0	0	0	32	0	0	0	0	0	0	53	0	9	0	0
04:00:00	0	0	0	0	0	7	0	13	0	0	5	0	0	0	0	0	0	0	0	3	10	0	0	0	0	0	0	0	10	0	10	2	21	35	4	0	0	18	1	0	0	0	0	0	37	0	66	0	0
04:30:00	0	0	0	0	0	0	0	0	0	34	0	0	8	0	0	0	0	0	0	0	81	0	0	0	0	0	0	0	0	9	0	0	0	14	0	0	0	3	0	29	0	32	50	0	49	0	0	0	0
05:00:00	0	0	0	0	0	0	0	102	0	0	29	0	5	0	0	42	0	0	0	40	57	0	0	0	0	0	0	5	0	19	12	0	0	18	0	0	0	0	0	60	0	41	19	0	59	0	1	0	0
05:30:00	0	0	0	16	0	0	0	75	0	0	4	0	57	0	6	58	0	0	0	25	0	0	0	0	10	0	0	1	0	0	0	0	0	45	3	0	0	0	0	0	0	0	0	0	84	0	0	0	0
06:00:00	0	0	1	25	0	2	0	39	0	0	58	0	12	0	49	0	0	0	10	0	0	0	0	0	0	0	0	19	58	0	9	47	0	52	0	0	0	0	0	0	0	0	0	0	71	0	0	0	0
06:30:00	0	6	0	1	0	52	0	8	0	0	56	0	6	42	0	0	0	0	46	0	0	0	31	78	0	0	0	67	59	0	12	32	0	8	0	0	24	0	0	0	41	0	8	0	81	0	0	0	0
07:00:00	20	1	18	20	0	29	1	0	0	0	46	0	0	0	0	0	0	0	0	0	34	0	114	57	0	15	0	2	0	0	0	17	0	0	4	0	29	0	0	61	5	0	45	0	29	0	29	0	0
07:30:00	53	1	50	0	0	0	48	0	0	23	39	0	0	10	15	0	0	0	12	10	76	64	15	0	0	36	0	0	0	0	12	24	17	64	57	0	0	47	1	0	0	13	36	2	89	0	0	0	0
08:00:00	37	0	9	26	0	0	57	0	0	47	27	0	47	0	0	20	0	0	17	88	103	17	0	0	0	75	38	14	34	40	52	43	3	72	5	0	14	83	1	0	0	60	35	35	102	7	0	46	35
08:30:00	63	76	70	56	92	84	84	45	70	61	61	72	56	73	62	86	73	83	60	65	126	65	82	69	76	72	84	89	65	61	70	64	58	64	76	86	45	71	99	85	78	62	54	84	54	79	74	94	79
09:00:00	64	66	102	46	70	89	66	59	47	62	74	50	53	78	61	68	78	51	54	64	112	68	99	113	54	87	82	98	65	62	95	51	59	65	75	72	56	83	93	92	87	61	61	105	80	60	62	83	77
09:30:00	69	63	77	46	75	79	69	71	38	37	65	58	64	57	49	66	77	43	62	68	106	48	96	120	62	92	88	88	63	61	77	70	47	59	84	57	75	76	91	91	95	71	65	87	77	77	73	65	72
10:00:00	71	67	55	48	70	58	87	63	30	44	52	60	61	57	49	63	65	40	60	78	109	33	85	135	57	78	70	73	79	37	76	43	45	69	80	47	52	70	108	96	80	62	56	90	71	60	90	71	60
10:30:00	79	65	51	49	60	49	75	35	43	47	50	47	61	72	39	65	63	34	35	72	102	42	94	128	61	77	53	72	80	47	74	51	51	55	76	75	68	67	69	121	83	52	52	65	81	60	76	73	45
11:00:00	76	57	56	46	47	51	69	54	41	49	68	37	55	41	54	48	19	28	38	45	93	30	75	117	52	84	56	70	91	38	50	64	45	59	66	48	59	63	53	70	55	43	45	81	113	55	66	53	18
11:30:00	86	49	44	36	20	40	73	53	39	47	51	38	47	16	34	44	2	30	27	19	86	15	84	108	32	86	64	63	87	34	62	86	26	66	56	44	62	33	35	39	64	74	23	50	58	58	43	44	19
12:00:00	66	66	32	19	4	30	62	35	30	58	26	30	44	0	15	21	0	33	0	0	53	2	70	141	36	87	70	61	72	15	47	65	38	65	58	50	63	37	25	13	37	54	21	48	72	34	47	30	25
12:30:00	85	34	5	4	10	29	52	29	19	13	27	5	42	0	6	4	2	25	2	0	41	6	69	115	0	56	38	48	40	7	23	29	20	51	22	14	51	2	30	0	29	43	11	43	70	17	22	10	11
13:00:00	74	40	4	0	0	49	8	63	4	28	15	6	29	0	26	2	0	2	0	0	53	8	30	118	0	25	22	23	20	0	9	27	16	62	3	3	16	0	3	0	6	36	35	21	20	7	6	6	0
13:30:00	76	29	18	5	0	77	0	47	1	2	1	0	21	0	0	1	0	7	0	0	0	0	14	119	15	4	1	6	2	2	4	37	5	45	3	2	12	1	0	0	5	39	9	0	1	0	6	5	0
14:00:00	52	36	0	0	1	77	6	46	0	7	0	0	8	0	0	0	0	0	0	0	0	0	11	117	2	2	0	7	0	1	0	10	0	27	0	0	1	1	13	0	4	15	6	0	0	0	0	0	0
14:30:00	11	19	2	0	0	56	0	42	0	15	0	0	0	0	0	0	0	0	2	0	0	0	3	118	4	0	2	8	0	0	0	12	0	4	0	0	4	5	0	0	0	0	0	0	0	0	0	0	0
15:00:00	0	12	0	0	0	0	0	36	0	0	0	0	0	1	0	0	0	0	0	0	0	0	2	111	9	0	0	0	0	0	0	14	0	1	0	0	0	4	0	0	0	1	0	0	0	0	0	0	41
15:30:00	1	4	21	0	0	0	1	31	0	0	0	0	11	8	0	13	0	0	0	0	0	0	3	96	0	0	0	3	0	5	0	17	0	4	0	0	0	10	0	0	0	0	0	0	0	0	1	0	0
16:00:00	2	0	0	0	0	0	0	39	0	0	0	0	2	76	0	2	0	0	0	0	0	0	7	95	0	0	0	3	0	21	8	35	0	0	0	0	0	18	0	0	0	0	0	0	0	0	0	0	16
16:30:00	1	1	1	0	0	0	0	16	0	0	0	0	0	4	0	1	0	0	0	0	0	5	1	28	0	0	0	0	0	38	0	19	0	0	0	0	0	4	0	1	0	0	0	1	0	0	1	0	5
17:00:00	1	2	28	0	0	0	4	40	0	0	0	0	0	0	0	0	0	0	0	0	0	24	0	5	0	0	0	12	0	16	0	9	0	6	0	1	2	0	0	0	0	13	0	3	14	0	0	0	54
17:30:00	6	4	5	0	0	3	0	14	0	0	4	4	0	0	0	0	0	0	29	0	0	17	1	22	1	0	0	3	0	9	129	0	0	5	0	21	12	4	0	0	0	0	1	1	4	0	0	0	2
18:00:00	2	2	0	0	0	3	9	38	0	2	3	11	0	0	2	4	0	1	0	2	0	0	9	9	18	28	0	1	1	15	5	1	0	2	0	4	51	38	2	4	0	1	2	7	0	0	1	0	3
18:30:00	11	9	3	2	1	34	2	26	1	0	3	4	16	3	27	2	7	23	32	38	0	21	32	0	1	6	1	2	11	32	23	12	0	32	0	5	0	26	1	36	1	22	16	3	2	0	3	0	3
19:00:00	11	13	16	10	19	41	4	22	1	27	4	24	33	24	8	10	2	28	2	28	2	0	1	7	18	8	13	6	16	33	30	16	0	26	1	0	7	20	5	35	3	8	27	11	14	15	8	2	18
19:30:00	45	53	34	32	18	21	40	49	39	35	22	19	44	42	15	22	64	18	26	59	29	18	13	1	33	31	27	23	18	22	56	12	0	30	21	4	10	37	27	47	3	25	13	37	54	38	6	5	35
20:00:00	49	60	50	50	36	50	32	50	41	26	50	60	53	56	36	66	66	42	35	74	29	39	25	28	42	59	58	45	47	71	75	40	20	39	49	46	37	62	76	50	27	63	57	42	70	50	56	59	31
20:30:00	99	106	87	64	107	100	75	119	76	78	76	75	84	109	89	92	96	81	55	120	117	86	96	117	79	62	91	105	79	100	88	70	43	82	90	80	105	163	114	133	96	86	79	88	158	101	104	91	81
21:00:00	95	81	93	55	93	97	64	91	72	82	73	88	43	109	83	60	72	64	48	115	110	45	87	90	59	34	88	110	105	94	79	75	7	96	113	84	65	125	100	146	72	72	51	100	142	86	73	90	66
21:30:00	70	25	60	31	33	81	108	78	55	102	57	77	25	42	110	7	4	35	57	24	124	36	59	50	43	26	68	74	85	84	49	50	8	80	60	51	38	82	69	132	45	80	18	91	136	136	53	46	18
22:00:00	37	0	7	0	6	63	46	89	72	57	34	13	0	0	86	0	0	8	28	0	64	14	28	4	1	0	37	6	24	51	3	3	0	60	0	1	4	32	25	16	21	32	0	29	120	4	15	28	3
22:30:00	35	0	1	0	0	2	17	38	6	44	8	0	0	0	22	0	0	0	15	0	0	14	2	1	0	2	4	6	12	50	0	0	0	12	0	0	0	0	0	0	7	6	0	16	76	1	10	10	4
23:00:00	14	0	0	0	0	7	9	21	0	26	25	0	0	0	2	0	0	0	0	0	3	0	49	0	0	4	0	0	8	58	0	0	0	10	0	0	0	1	1	0	1	1	10	0	31	0	8	0	3
23:30:00	0	0	0	0	0	39	1	13	0	21	6	1	6	0	7	0	0	0	0	0	0	0	49	0	0	7	0	28	52	15	28	25	0	8	0	0	0	0	0	0	0	6	4	0	17	0	8	0	13
00:00:00	1	0	0	0	0	13	10	41	15	1	16	0	0	0	13	0	0	0	0	0	0	0	2	0	0	0	0	5	0	20	17	69	0	19	0	0	50	0	0	0	0	24	0	6	28	1	69	40	9
00:30:00	46	1	12	0	0	35	0	24	1	0	12	0	0	0	7	0	0	0	19	0	0	0	0	0	0	0	4	3	3	22	13	17	0	49	1	0	3	0	0	8	0	20	0	0	65	0	2	4	59
01:00:00	12	0	13	0	0	37	5	57	23	45	5	0	11	0	33	66	0	0	4	0	0	0	20	35	0	17	0	0	43	12	6	6	0	58	8	0	3	0	0	8	0	22	19	0	30	1	29	1	37
01:30:00	14	18	22	0	0	6	0	22	25	1	29	0	21	0	7	1	0	0	5	2	0	0	56	45	0	29	8	0	22	14	26	11	0	38	5	0	0	13	2	0	0	17	32	0	29	1	8	2	10
02:00:00	16	31	18	0	5	0	0	32	5	25	38	0	11	0	15	0	0	0	21	0	15	41	0	0	3	10	0	0	27	26	0	0	0	32	0	0	0	28	0	0	0	6	5	5	40	0	77	1	139
02:30:00	0	12	21	0	0	38	0	16	48	0	7	0	8	5	22	21	0	33	2	0	64	0	0	55	0	7	0	65	5	22	1	33	0	18	0	0	0	5	0	0	0	10	1	0	34	0	6	0	17
03:00:00	35	10	37	0	0	20	30	29	50	19	34	0	0	0	46	9	0	6	8	0	15	23	0	8	27	6	0	6	25	0	0	4	0	29	16	0	23	0	0	2	0	15	12	1	43	1	1	0	9
03:30:00	0	7	58	0	0	0	31	31	16	0	13	0	18	0	32	39	0	0	18	0	31	0	0	59	27	3	25	0	3	10	10	0	0	19	13	13	60	15	0	0	1	0	36	6	39	0	1	23	19
04:00:00	29	54	31	1	0	0	9	4	0	42	45	0	19	0	0	29	0	21	17	0	0	0	2	0	0	0	276	0	45	19	12	7	0	26	17	0	0	16	0	27	7	0	25	2	32	0	0	58	0
04:30:00	19	12	0	1	0	0	11	0	0	8	38	11	0	0	33	13	0	0	0	0	0	42	53	33	0	11	36	0	0	8	2	16	37	21	0	0	0	7	0	10	0	0	0	18	23	0	0	0	2
05:00:00	0	0	0	1	10	75	9	18	0	29	25	1	18	0	34	17	0	0	7	28	0	0	0	26	0	0	3	0	0	4	38	5	8	0	13	2	37	77	42	8	35	36	0	38	25	0	64	0	49
05:30:00	18	0	30	2	0	60	12	12	0	36	39	0	12	0	0	3	0	7	11	18	0	22	22	0	0	12	0	0	40	15	9	2	0	35	49	6	21	21	0	23	2	24	0	83	20	0	57	0	1
06:00:00	0	2	1	2	0	31	0	55	7	1	18	0	14	0	24	18	0	43	0	37	68	11	18	2	43	0	0	2	0	12	6	33	0	61	48	0	1	0	14	0	1	23	72	0	35	51	1	0	0
06:30:00	41	26	6	0	34	0	0	32	45	25	43	5	16	56	30	26	1	1	1	1	74	0	35	0	0	25	0	35	0	41	6	0	0	38	43	5	0	0	34	0	125	26	21	9	79	46	2	0	52
07:00:00	33	4	1	0	20	10	0	30	42	0	66	50	3	45	0	36	0	0	0	2	76	0	0	0	0	24	0	11	0	24	0	33	0	49	0	2	0	12	11	59	30	0	0	8	65	64	6	0	3
07:30:00	18	16	44	23	1	51	18	19	0	0	46	31	33	0	0	15	22	57	0	7	11	0	0	0	0	36	0	30	36	29	0	0	0	29	10	3	0	43	5	17	0	8	0	0	59	20	1	65	24
08:00:00	0	51	16	45	5	37	46	9	1	50	51	45	39	0	67	27	23	8	21	51	0	15	49	41	35	49	39	14	73	75	31	17	0	49	43	4	12	5	2	0	6	19	5	0	69	38	62	84	65
08:30:00	59	75	62	41	83	63	80	43	54	46	51	58	49	70	74	82	72	53	57	69	66	80	63	62	57	69	71	67	85	73	63	40	50	77	80	69	63	71	96	86	58	64	79	53	71	52	83	79	92
09:00:00	61	73	64	40	70	90	69	34	44	45	62	62	44	60	71	88	75	46	44	73	99	75	70	88	58	68	68	53	62	80	68	44	36	69	60	63	57	52	89	83	58	56	47	63	87	57	74	78	90
09:30:00	42	78	76	39	65	91	74	56	54	50	63	55	48	58	85	85	64	49	48	75	95	55	70	89	54	73	83	64	98	70	69	42	40	72	75	136	55	62	75	96	63	52	52	66	88	57	81	63	69
10:00:00	52	72	63	37	38	66	63	58	49	56	47	52	49	58	75	84	61	32	48	73	96	54	68	107	49	81	86	58	97	76	53	37	43	66	77	62	70	77	119	79	61	46	56	74	84	64	55	84	66
10:30:00	47	80	52	30	20	54	76	70	37	49	63	59	55	51	60	92	69	22	53	51	92	55	70	101	41	58	80	49	72	68	66	52	36	60	92	57	74	69	70	74	47	54	50	64	59	43	67	93	38
11:00:00	60	61	52	42	14	54	62	56	46	61	35	45	44	44	33	56	48	37	58	18	80	60	68	103	32	66	72	64	102	44	52	48	32	67	86	51	100	26	77	42	37	43	44	58	70	43	59	73	10
11:30:00	61	69	32	17	10	58	64	57	38	49	31	41	42	27	24	22	52	41	59	14	58	44	63	105	20	60	51	45	104	45	50	46	31	88	83	16	59	9	66	36	37	39	47	43	90	64	40	47	9
12:00:00	62	47	9	28	6	39	58	61	32	33	18	22	55	0	8	8	34	44	75	2	36	38	60	122	16	37	0	50	80	36	41	48	41	64	81	3	53	2	43	2	38	48	50	22	49	40	17	61	6
12:30:00	57	51	2	2	2	0	41	51	15	16	4	8	42	0	8	3	4	28	6	0	8	20	35	119	0	4	0	59	35	15	37	45	30	54	73	3	31	0	21	0	25	40	66	29	49	24	12	44	7
13:00:00	41	23	1	1	0	2	3	47	0	5	2	13	32	0	0	1	0	13	0	0	2	32	16	121	2	0	0	39	10	4	29	35	9	30	54	0	18	0	2	0	15	25	35	6	47	1	0	7	12
13:30:00	2	20	0	1	0	2	1	52	0	3	2	5	15	0	1	0	3	6	0	0	0	7	0	118	2	2	0	19	1	0	11	30	0	67	29	0	3	0	0	0	7	10	39	1	41	0	0	2	0
14:00:00	4	8	0	0	0	10	0	29	0	0	0	0	8	0	1	0	0	5	0	0	0	5	0	110	36	0	0	5	0	45	7	25	0	84	1	1	1	0	1	0	0	8	35	1	1	0	0	1	73
14:30:00	0	0	2	0	3	0	0	31	0	0	0	0	12	0	0	1	0	0	0	0	0	17	0	95	0	0	0	17	0	10	11	6	0	15	1	0	0	0	0	0	0	1	19	1	0	0	0	0	49
15:00:00	0	0	0	2	0	10	0	12	0	0	0	0	3	0	0	0	1	0	0	0	0	19	0	86	0	0	0	0	0	1	3	0	0	6	0	0	0	0	0	0	0	0	11	0	0	0	0	0	77
15:30:00	0	0	0	2	0	17	0	16	0	0	0	0	3	0	0	5	0	1	0	0	0	4	6	79	0	0	0	0	0	0	9	3	0	0	0	0	0	0	1	0	0	0	2	0	0	0	0	0	18
16:00:00	0	0	0	0	0	26	0	17	0	6	0	0	2	0	0	15	0	0	8	1	0	7	0	78	0	0	0	2	0	0	0	5	0	2	0	1	0	27	0	0	0	2	5	10	0	0	0	0	70
16:30:00	1	3	4	0	0	1	0	16	0	23	0	0	8	0	0	35	0	0	15	0	0	20	2	12	0	0	0	10	0	0	2	2	0	6	1	0	0	2	0	0	0	5	2	5	0	0	0	0	67
17:00:00	35	0	2	0	0	7	75	9	0	0	0	0	10	0	0	9	0	0	1	0	0	13	1	7	29	0	0	41	0	1	0	1	0	2	0	0	1	5	1	0	0	0	4	7	0	0	0	0	6
17:30:00	7	0	1	0	0	13	22	15	0	0	0	0	31	0	0	2	0	0	2	0	0	3	25	0	3	21	0	35	0	17	5	0	0	0	0	0	0	0	0	0	0	0	7	13	0	2	0	3	30
18:00:00	5	5	2	1	0	5	2	25	12	0	0	7	38	0	1	7	1	0	4	0	1	24	0	1	0	5	0	14	0	28	14	15	0	4	0	0	0	2	3	1	1	4	22	10	29	0	3	5	45
18:30:00	4	41	5	6	0	1	2	31	23	0	13	6	40	2	1	14	2	5	1	16	5	21	5	27	1	13	0	13	4	38	27	17	0	26	1	1	1	5	2	5	1	25	15	17	29	2	0	4	10
19:00:00	25	67	26	15	0	39	17	37	23	0	24	10	47	44	12	21	33	0	11	7	23	23	14	10	13	12	9	27	0	57	39	19	1	21	12	0	11	24	6	8	11	6	10	18	61	35	4	17	34
19:30:00	28	71	21	32	8	34	30	41	42	0	19	34	34	59	19	24	58	6	43	39	47	21	39	8	42	18	30	32	3	59	44	38	0	42	23	16	22	48	4	15	50	54	12	32	51	44	17	38	39
20:00:00	35	88	43	40	30	30	47	48	37	5	21	32	46	50	34	68	53	10	31	51	54	44	30	38	35	61	58	61	32	59	61	48	19	18	41	55	26	56	61	41	44	22	25	46	78	38	37	36	52
20:30:00	93	125	101	70	59	95	94	139	63	62	63	78	87	90	98	119	93	72	68	100	117	101	102	121	74	85	102	100	101	112	107	83	56	86	91	76	84	140	118	82	85	60	88	94	182	121	91	98	106
21:00:00	74	45	106	61	63	72	112	112	54	61	84	94	57	74	89	101	44	83	65	120	104	110	84	110	85	48	88	105	117	104	96	60	25	83	114	57	94	131	111	105	85	63	72	93	176	57	92	103	78
21:30:00	79	10	67	57	47	94	86	87	79	58	64	84	24	54	100	31	4	91	61	65	129	70	110	78	47	19	81	126	99	80	49	14	12	101	107	49	36	120	85	124	94	45	47	78	161	48	56	84	50
22:00:00	49	0	15	31	7	84	16	68	49	40	24	27	29	2	117	21	2	24	23	0	69	40	60	7	0	10	13	31	54	76	22	20	4	81	39	8	5	61	11	31	21	17	7	24	125	39	8	44	23
22:30:00	16	0	18	13	0	65	0	45	47	19	25	0	0	0	50	4	1	3	0	0	9	13	22	0	0	1	11	8	21	27	15	1	0	34	7	0	1	30	3	0	10	10	14	8	49	10	1	10	5
23:00:00	3	0	9	4	0	0	0	40	41	6	21	0	0	0	36	0	0	0	0	0	3	13	13	0	0	0	2	1	23	44	3	27	0	19	0	0	0	17	0	0	0	0	8	4	21	15	0	8	79
23:30:00	10	0	18	8	2	0	0	15	8	1	25	4	19	0	31	0	0	0	1	0	10	5	12	0	0	2	0	23	2	37	12	8	0	22	0	0	0	28	0	0	0	0	39	0	16	83	13	10	4
00:00:00	0	9	16	6	0	0	7	30	28	35	16	2	4	0	26	18	2	0	2	0	4	30	0	0	0	0	0	46	52	38	7	0	0	18	0	0	8	35	0	2	0	0	7	10	10	23	31	0	4
00:30:00	36	0	2	8	0	0	37	15	25	42	27	0	2	0	34	6	0	0	0	0	71	15	20	0	3	0	8	33	40	11	29	0	0	4	0	0	0	38	0	0	12	16	65	0	39	1	0	0	0
01:00:00	31	13	2	29	0	25	26	12	0	25	6	0	36	0	37	8	0	0	0	31	84	0	1	14	8	9	0	4	3	8	46	47	0	70	31	0	0	64	0	6	5	4	2	8	9	0	1	23	3
01:30:00	38	0	14	39	0	1	39	20	67	6	10	0	9	0	35	38	0	0	1	2	52	27	0	45	34	19	0	30	7	0	30	58	0	45	90	0	0	50	0	24	0	11	19	2	18	3	0	3	29
02:00:00	25	26	2	41	0	10	20	34	44	34	15	1	28	0	38	53	0	10	2	12	44	0	35	1	4	13	8	48	29	25	39	2	0	35	0	0	0	65	0	6	0	45	44	0	44	1	28	17	20
02:30:00	19	0	10	14	0	46	16	28	29	21	15	24	22	2	28	29	0	0	7	1	18	41	8	54	15	0	27	28	14	5	8	3	0	23	0	0	0	16	0	0	0	36	8	2	22	1	10	8	2
03:00:00	1	0	40	4	0	33	0	33	30	0	12	10	6	0	35	33	17	8	13	32	57	0	33	20	0	2	6	22	24	25	44	23	0	3	0	0	0	14	0	4	0	28	1	0	29	1	32	7	0
03:30:00	13	0	0	1	0	17	0	15	3	33	16	9	12	0	21	64	5	0	0	0	0	18	0	0	0	20	20	0	0	65	6	0	1	35	1	0	0	27	0	37	0	46	9	0	44	80	1	52	1
04:00:00	0	0	27	0	0	1	7	4	0	20	12	17	5	0	13	4	8	0	2	0	0	0	23	0	0	0	0	50	0	34	18	0	0	11	0	0	21	1	3	10	43	0	37	5	41	0	0	21	0
04:30:00	19	2	57	0	0	11	1	31	1	0	9	66	40	0	29	0	0	30	0	0	0	0	19	35	44	61	0	5	0	0	5	18	0	10	0	0	0	0	0	0	19	0	0	2	5	0	10	3	40
05:00:00	20	4	8	17	0	34	0	15	0	6	5	45	1	0	31	21	0	15	2	39	0	0	64	51	9	45	0	0	4	0	18	0	1	30	0	0	5	0	0	56	0	11	1	11	17	0	28	2	0
05:30:00	19	7	0	6	0	2	0	9	0	42	24	44	14	0	12	31	0	8	1	47	74	0	34	4	0	21	29	8	49	5	14	22	0	10	11	0	27	0	0	8	24	0	24	53	27	0	0	20	0
06:00:00	49	48	0	4	0	0	17	27	21	11	33	1	2	53	37	21	11	22	37	1	71	0	3	27	0	13	15	29	36	44	4	1	0	33	36	2	51	0	1	0	0	0	26	6	29	1	0	20	0
06:30:00	32	16	65	14	0	0	18	59	33	18	19	0	21	0	18	15	3	4	15	35	28	42	13	17	0	33	7	18	0	19	13	37	1	47	13	0	0	7	0	14	1	24	8	0	92	19	0	50	0
07:00:00	19	0	16	16	0	57	19	56	33	20	64	7	14	7	57	73	0	51	20	0	38	36	61	41	28	26	23	0	28	20	0	0	0	31	4	0	21	0	0	1	33	35	25	0	53	50	0	23	16
07:30:00	15	0	0	23	0	4	0	62	0	6	47	26	20	1	9	92	1	21	5	0	58	43	3	34	2	25	0	2	52	20	0	0	0	42	60	0	0	18	0	29	31	23	26	33	24	21	57	39	75
08:00:00	30	23	43	32	36	22	49	33	52	50	39	18	18	38	65	58	25	22	34	57	57	66	0	27	52	38	37	37	32	15	20	21	0	54	75	15	16	30	41	27	29	25	17	35	75	34	45	46	50
[truncated: 86 more columns]

## Sheet: Fig 6 S2 A (ND TSC1 RNAi)
FED(TSC1 RNAi~BD-AD-AKHR)	M21-8.3																M22-8.3													M27-8.4								M17-10.12
20:30:00	62	42	47	54	54	90	61	37	57	65	48	24	76	57	78	58	58	26	67	51	44	59	46	78	47	33	36	53	38	53	73	46	43	33	44	51	46	21	50	33	7	56	28	58	73	13	36	26	67
21:00:00	42	0	0	102	32	77	23	43	43	30	55	2	47	41	8	57	17	14	62	13	36	44	11	21	8	33	28	15	42	36	50	54	37	17	42	53	29	11	70	17	10	28	18	62	17	4	6	22	66
21:30:00	31	0	0	8	31	46	7	18	12	8	33	11	13	17	4	18	4	10	28	2	16	23	9	7	2	6	15	2	21	22	22	18	0	0	30	21	23	15	53	5	9	34	0	36	2	1	47	7	64
22:00:00	48	0	23	0	24	14	1	31	6	16	0	0	2	16	0	0	0	0	4	0	0	9	0	0	0	0	4	0	9	0	7	0	0	0	32	5	6	0	60	0	0	12	3	9	4	0	19	5	79
22:30:00	44	0	11	0	29	0	14	1	1	0	0	0	0	5	0	0	0	0	0	0	0	2	0	0	0	0	0	0	0	0	0	0	0	0	18	0	2	23	0	0	1	0	0	0	0	0	8	5	0
23:00:00	35	0	4	0	21	0	11	9	0	0	0	18	0	8	0	0	5	0	0	0	0	0	0	0	5	0	0	1	0	0	0	0	0	7	12	0	0	0	0	0	8	8	7	0	6	10	0	0	0
23:30:00	36	0	0	0	11	0	0	5	0	0	0	7	0	5	0	0	17	0	0	0	0	0	4	1	3	0	13	0	0	0	0	0	0	18	2	0	0	0	0	19	0	0	8	0	12	4	0	41	1
00:00:00	23	0	0	0	10	0	11	26	0	0	0	3	0	6	0	0	0	0	0	0	0	0	1	2	1	0	33	0	0	0	0	0	0	4	4	0	0	0	0	8	0	3	4	0	0	14	0	0	0
00:30:00	18	0	0	0	6	0	2	0	0	0	0	7	0	0	0	0	6	5	0	0	8	0	4	0	0	0	0	0	0	0	14	0	4	2	0	0	0	0	0	3	6	0	0	0	22	12	0	0	0
01:00:00	39	0	0	0	6	0	2	0	0	0	0	0	0	1	0	0	2	14	0	0	31	0	0	0	0	0	0	0	0	0	0	30	0	0	0	10	0	0	0	48	3	0	0	0	46	18	0	0	0
01:30:00	23	0	17	0	4	0	0	0	0	0	0	0	0	0	0	0	5	6	0	0	0	0	0	0	0	0	0	0	0	0	0	0	0	0	29	42	0	0	0	16	0	0	0	50	2	13	0	0	0
02:00:00	30	0	0	0	1	0	0	0	0	0	0	0	0	0	0	0	4	0	0	0	2	0	0	0	0	0	0	0	0	0	6	0	0	0	0	0	0	2	0	31	0	8	0	10	0	0	0	4	0
02:30:00	15	0	0	0	4	0	3	0	0	0	0	0	0	0	0	0	3	0	0	0	11	2	0	0	0	0	0	0	0	0	56	0	0	0	0	0	0	0	0	0	0	21	0	0	18	19	0	3	0
03:00:00	16	0	0	0	0	0	0	30	0	0	0	1	0	0	0	0	0	0	0	0	0	1	0	0	10	0	0	0	0	0	0	0	0	32	3	0	0	3	0	0	0	10	0	0	11	29	0	0	0
03:30:00	25	0	0	0	0	0	0	3	0	0	0	8	0	4	0	0	7	0	0	0	0	0	0	0	11	0	0	0	0	0	0	0	0	4	0	0	0	11	0	0	0	0	0	0	0	39	0	0	0
04:00:00	31	0	0	0	1	0	0	1	0	0	0	5	0	0	0	0	3	0	0	0	0	0	8	14	0	0	0	0	0	0	0	0	0	0	34	0	0	19	0	0	0	10	0	0	2	21	0	0	0
04:30:00	37	0	0	0	3	0	0	0	0	0	0	0	6	5	0	0	15	0	0	0	0	0	5	1	0	0	0	0	0	0	16	0	0	41	11	0	0	7	0	0	0	0	0	0	0	0	0	0	0
05:00:00	9	0	0	0	7	0	0	0	0	0	0	6	45	14	0	0	12	0	0	0	0	0	0	0	0	0	0	0	0	0	16	0	0	4	0	56	0	4	0	0	0	78	9	0	0	0	0	0	0
05:30:00	37	0	0	0	0	0	0	0	0	0	0	0	0	0	0	0	0	0	0	7	0	0	0	12	0	0	0	0	0	0	1	0	0	0	0	2	0	12	0	0	0	1	2	0	0	27	10	0	0
06:00:00	21	0	0	0	0	0	0	0	0	0	0	0	0	2	0	0	0	0	0	0	0	0	0	28	0	0	0	0	0	0	2	41	0	0	0	0	0	10	0	0	0	0	13	44	0	31	0	0	0
06:30:00	13	0	0	0	15	0	0	24	1	0	0	0	0	10	0	0	0	11	0	5	0	0	0	30	0	0	0	0	0	0	0	7	0	0	0	16	28	13	0	0	0	0	4	13	0	0	0	0	0
07:00:00	27	0	0	20	12	0	0	0	1	30	0	0	0	0	0	0	0	0	0	0	0	0	0	0	0	0	0	24	23	0	23	10	0	0	0	0	46	6	0	0	0	0	10	0	0	0	0	0	22
07:30:00	30	0	15	37	7	0	0	0	34	4	0	0	6	13	0	0	3	0	0	0	0	0	0	34	0	31	0	18	37	0	23	6	0	11	24	0	34	0	0	0	0	7	16	0	0	0	0	38	59
08:00:00	49	0	1	0	14	0	3	0	0	17	0	0	33	9	0	0	5	0	0	0	0	15	0	21	0	2	0	36	24	0	9	7	8	42	3	14	10	4	0	0	0	12	0	0	0	9	0	4	49
08:30:00	51	36	26	43	57	40	47	29	42	50	64	12	25	45	0	28	33	27	42	20	36	35	65	59	37	25	14	33	47	31	37	21	26	28	32	37	37	25	49	40	14	38	38	47	42	21	29	47	42
09:00:00	39	59	24	29	31	16	33	17	44	30	3	18	13	49	6	51	32	31	28	20	19	14	33	47	29	21	16	40	32	27	20	17	10	19	21	21	31	6	75	55	15	6	23	50	26	1	50	10	10
09:30:00	45	29	20	30	34	21	31	43	28	32	7	4	6	45	4	15	17	12	33	19	14	13	33	32	24	12	24	25	34	22	15	16	17	8	24	22	27	6	54	32	11	9	18	46	33	15	20	7	7
10:00:00	48	25	3	28	24	13	20	21	28	30	0	5	8	35	0	6	14	19	24	19	26	6	24	13	18	33	20	24	30	11	13	26	13	7	30	24	26	11	65	28	20	18	9	14	19	0	31	35	53
10:30:00	47	24	0	26	34	30	19	24	25	23	14	10	6	24	0	5	23	2	18	14	15	8	15	22	13	23	16	9	40	14	14	12	32	34	17	19	13	0	38	30	14	11	10	20	21	11	9	10	30
11:00:00	47	7	2	28	24	12	14	15	12	29	5	6	2	37	0	2	18	12	11	8	26	4	11	6	11	11	12	0	19	6	2	9	8	10	14	12	9	9	34	13	5	0	6	22	10	0	2	15	14
11:30:00	41	17	0	42	18	15	14	21	18	11	9	1	0	22	0	6	9	8	11	2	22	2	45	17	18	6	14	39	20	10	7	10	39	27	15	6	27	2	11	0	0	2	2	1	8	0	18	15	25
12:00:00	41	24	6	28	14	13	17	10	8	19	4	0	5	32	0	12	2	11	49	2	14	1	8	2	21	5	43	9	10	1	0	3	33	4	9	2	8	8	18	11	10	0	5	14	40	0	22	0	20
12:30:00	28	10	1	31	13	19	10	5	2	9	0	0	1	12	0	0	4	0	6	1	7	0	6	0	13	0	1	8	8	0	7	1	2	0	4	0	16	0	0	15	9	23	3	10	4	0	6	8	18
13:00:00	32	8	2	19	11	7	2	10	2	5	0	0	2	13	0	0	11	2	0	0	9	1	2	0	9	0	24	0	7	0	4	4	11	0	3	0	8	0	0	19	7	0	12	20	7	0	0	2	15
13:30:00	26	11	16	15	7	6	7	0	6	6	0	2	1	34	0	0	0	0	0	0	11	0	1	0	11	25	5	3	2	0	0	6	12	10	7	8	17	1	4	14	0	0	26	0	8	0	0	2	0
14:00:00	23	4	3	14	8	6	3	17	3	8	12	0	1	10	0	0	0	1	0	1	4	1	0	10	6	0	6	15	2	0	10	5	10	0	0	0	26	7	0	0	0	0	5	22	2	0	0	8	0
14:30:00	29	2	3	8	3	2	3	5	4	13	0	0	0	2	0	0	0	3	0	0	1	1	1	1	15	0	9	0	9	0	0	0	5	0	11	0	2	0	0	0	6	4	1	0	0	0	0	3	0
15:00:00	19	0	2	2	1	13	4	15	0	0	0	0	0	37	0	0	0	2	0	0	1	0	0	1	8	0	7	0	2	0	0	0	1	9	6	0	4	0	18	0	2	3	0	0	0	5	0	2	0
15:30:00	31	0	0	7	4	13	5	8	0	20	0	1	3	4	23	0	0	0	0	0	13	1	0	0	12	0	26	0	5	1	0	0	7	0	4	0	15	25	0	0	0	0	0	23	0	21	0	3	0
16:00:00	26	39	1	28	15	22	13	18	0	28	0	0	33	15	26	8	26	29	8	0	35	0	35	29	32	11	31	36	24	0	0	0	56	4	0	0	1	2	18	0	0	0	64	3	0	21	0	3	0
16:30:00	27	3	3	11	0	8	5	1	9	9	0	0	2	27	3	0	9	1	9	0	24	0	9	7	21	1	11	0	7	0	0	0	6	13	11	0	34	1	13	0	0	25	8	15	0	23	9	12	0
17:00:00	35	34	41	24	43	25	20	30	8	35	8	0	38	19	0	3	25	14	43	10	23	3	16	18	23	13	15	30	31	0	9	0	6	0	2	0	5	0	0	0	0	0	0	0	0	6	0	9	0
17:30:00	28	3	0	9	0	3	3	0	20	2	0	0	0	7	5	0	2	0	0	11	10	0	0	2	10	10	2	0	7	0	2	0	8	0	12	0	2	7	32	0	6	8	0	0	43	21	0	14	1
18:00:00	11	0	0	2	9	5	3	8	0	7	7	3	0	0	0	0	0	0	0	20	1	0	0	2	4	11	0	1	0	0	13	0	4	2	8	0	19	0	13	0	2	0	0	0	0	3	0	7	52
18:30:00	15	0	0	1	18	19	0	11	0	0	11	8	3	3	0	0	0	2	0	17	0	0	2	10	2	18	5	6	12	42	9	16	16	2	22	0	27	0	34	17	7	29	19	20	57	0	0	13	23
19:00:00	15	2	0	17	2	22	3	14	8	5	0	19	4	3	34	14	8	6	0	7	0	21	0	13	13	15	12	10	7	19	4	3	6	15	7	0	6	0	15	3	3	0	3	13	0	0	0	2	37
19:30:00	25	18	0	24	13	11	10	0	14	0	8	15	13	20	0	24	0	8	0	8	5	14	3	21	14	28	12	28	6	23	9	0	18	25	18	0	10	7	24	24	0	9	17	15	0	12	1	5	28
20:00:00	22	15	5	26	7	8	15	3	20	18	17	7	15	12	0	28	7	29	0	9	7	8	22	21	17	18	16	35	19	10	23	4	9	11	18	0	25	15	43	14	16	3	24	33	16	11	38	13	45
20:30:00	68	24	10	54	33	65	40	66	57	79	19	23	39	42	49	55	30	44	55	41	69	66	60	69	29	47	40	34	43	53	48	41	73	38	62	40	30	20	53	49	16	54	48	20	54	23	66	26	61
21:00:00	46	14	0	26	20	19	19	46	22	39	10	0	21	19	12	18	0	26	14	4	24	40	35	39	11	4	28	0	18	23	26	48	24	8	40	33	26	22	56	15	0	44	28	15	29	0	42	21	60
21:30:00	41	51	14	9	24	9	14	38	13	10	0	0	9	18	5	9	0	11	11	0	24	31	15	23	17	4	10	0	8	27	4	30	0	3	28	16	8	2	16	2	0	12	0	2	1	2	39	13	15
22:00:00	42	18	0	0	21	0	10	43	0	0	28	0	0	21	6	24	0	0	3	0	8	0	0	3	20	0	4	0	10	0	0	13	0	0	16	7	0	21	27	0	0	0	0	0	16	0	1	0	11
22:30:00	28	66	0	0	17	0	15	37	18	0	19	0	0	7	24	0	0	0	7	0	0	0	0	0	9	0	0	0	6	0	0	6	6	0	11	20	0	0	0	0	0	0	0	0	0	0	0	17	0
23:00:00	18	18	0	0	11	0	7	15	13	0	0	0	0	5	11	9	0	0	0	0	0	0	0	0	2	0	0	0	4	0	0	0	0	0	4	3	0	0	0	29	0	0	0	0	0	0	0	0	0
23:30:00	12	0	4	0	3	0	11	0	8	0	9	0	0	3	1	0	15	0	7	0	0	0	9	0	0	0	0	0	7	0	0	2	0	0	6	20	0	0	0	0	0	0	0	0	0	0	0	0	0
00:00:00	6	0	0	0	0	0	13	0	0	0	0	2	0	3	46	0	10	0	11	0	0	6	0	0	0	0	3	0	6	0	0	0	0	0	3	8	0	0	0	0	0	5	0	0	0	0	0	0	0
00:30:00	10	0	18	0	5	0	9	0	0	0	28	0	0	2	12	0	0	0	4	0	0	1	0	0	0	0	29	0	6	0	0	4	0	0	1	14	0	0	0	0	0	0	0	0	0	0	0	14	0
01:00:00	11	0	9	0	15	0	26	7	0	0	20	14	0	0	15	0	19	0	0	0	0	4	0	0	0	0	0	10	32	0	0	0	0	0	3	25	0	0	0	0	0	0	0	0	0	0	0	0	0
01:30:00	9	0	0	0	13	0	21	18	0	0	8	0	0	11	1	0	0	1	0	0	0	0	0	0	0	0	0	0	20	0	0	0	0	0	1	0	19	0	0	0	0	0	0	0	0	0	0	0	0
02:00:00	5	0	0	0	5	0	17	25	0	0	13	0	0	0	0	0	10	18	0	0	0	2	3	0	7	0	24	0	0	0	5	0	0	8	3	0	0	0	34	0	0	0	0	19	0	0	0	0	0
02:30:00	23	0	0	0	0	0	4	23	1	0	0	0	0	8	0	0	7	7	0	1	0	10	6	0	0	0	28	0	0	3	0	0	11	12	14	0	0	0	0	0	0	0	0	16	0	6	0	0	0
03:00:00	9	0	0	0	0	0	13	1	0	6	0	0	0	0	6	0	0	0	0	0	0	0	0	4	0	0	13	0	0	0	0	0	4	0	4	0	0	0	0	0	0	0	0	0	0	55	0	22	0
03:30:00	9	0	0	0	0	0	8	15	0	3	0	0	0	0	1	0	0	0	0	0	0	0	2	3	10	0	0	0	0	0	0	0	0	0	0	0	0	0	1	0	0	0	0	0	0	24	0	8	0
04:00:00	9	0	0	0	0	0	7	2	29	6	0	0	0	8	16	0	0	0	0	0	0	2	0	24	2	1	0	0	0	0	0	0	21	27	0	0	0	3	0	0	0	0	0	0	0	0	0	0	0
04:30:00	16	0	0	0	0	0	0	0	0	6	0	0	0	13	1	0	0	0	0	0	0	2	0	12	2	0	0	0	0	0	0	0	2	22	0	0	12	0	0	0	0	15	17	0	0	0	0	15	0
05:00:00	20	0	0	0	18	0	4	0	0	17	0	0	0	7	75	0	0	0	0	1	0	1	0	15	10	9	0	0	0	0	0	0	0	0	0	0	48	0	36	0	6	12	8	0	0	0	0	0	0
05:30:00	13	0	0	0	0	0	4	1	0	3	0	0	0	19	0	0	0	0	0	0	0	0	0	2	14	3	0	3	0	0	0	0	0	0	0	8	32	0	32	0	0	0	5	0	0	0	0	0	0
06:00:00	9	0	0	0	6	0	0	0	0	5	0	0	0	2	0	0	0	13	0	0	0	0	0	26	0	20	0	11	0	1	0	0	0	0	15	8	18	0	0	0	0	0	1	0	0	0	0	0	0
06:30:00	11	0	9	8	10	0	2	3	0	18	0	0	0	13	0	0	0	0	0	0	0	0	0	5	2	18	12	14	18	0	19	0	0	0	0	0	2	0	0	0	0	0	43	37	0	0	3	0	0
07:00:00	10	0	2	15	16	0	7	12	0	1	9	0	12	8	0	0	24	0	0	0	0	0	25	1	10	0	35	2	22	0	6	0	4	0	1	0	0	0	0	0	9	0	0	0	0	0	29	13	17
07:30:00	13	0	16	0	17	66	7	0	0	21	16	0	6	21	0	0	5	0	0	0	0	0	6	22	7	7	0	18	12	0	2	17	0	0	0	7	0	0	0	0	12	22	7	24	0	9	0	4	64
08:00:00	19	0	0	29	40	0	0	2	0	5	8	5	5	23	0	3	16	4	15	0	14	0	4	22	6	3	16	11	19	4	18	0	0	29	22	0	17	0	0	26	0	13	8	2	0	0	23	13	38
08:30:00	46	42	22	38	35	37	32	28	39	44	31	21	18	48	31	49	35	15	52	30	36	23	41	48	31	17	32	25	25	32	37	6	20	30	23	19	24	26	61	42	16	21	11	35	31	9	42	8	27
09:00:00	51	38	9	37	31	22	25	38	36	26	15	16	9	35	11	23	39	19	33	21	22	27	31	48	34	26	24	28	28	13	17	19	18	35	20	20	28	18	36	26	12	13	25	26	26	9	23	15	41
09:30:00	52	26	2	25	32	24	17	24	23	25	12	21	10	40	28	13	30	13	26	22	30	8	20	29	32	18	16	20	25	17	25	8	21	18	19	23	27	3	57	34	7	16	14	14	12	14	18	4	31
10:00:00	50	23	2	29	28	17	29	16	10	23	5	20	8	37	7	6	23	6	19	12	17	5	22	21	26	11	14	23	21	13	15	9	17	17	23	18	22	11	23	16	6	17	20	22	14	2	30	0	34
10:30:00	46	18	6	40	20	18	25	19	23	20	4	23	10	30	0	6	11	4	20	8	22	8	8	16	22	24	16	1	28	7	6	3	31	16	17	17	6	18	42	26	5	11	24	48	14	6	16	13	22
11:00:00	53	14	5	36	33	13	9	28	15	27	0	6	3	28	0	7	5	4	17	8	9	5	9	18	13	24	24	0	25	7	6	6	12	12	19	10	21	2	24	26	0	0	14	9	16	0	9	10	28
11:30:00	57	12	3	22	14	10	7	10	11	9	0	7	4	32	19	4	8	2	6	24	15	3	8	10	10	14	12	0	8	0	9	4	22	3	9	0	5	0	9	14	8	20	5	9	9	2	0	11	13
12:00:00	55	7	2	27	13	9	22	0	11	0	0	4	4	18	0	2	3	1	11	2	13	10	13	0	12	16	8	0	11	0	1	1	7	1	7	0	13	7	20	18	0	2	4	6	1	8	3	8	18
12:30:00	38	9	7	17	11	11	6	12	2	16	0	9	1	17	1	3	5	0	4	0	15	0	2	1	6	0	0	3	17	0	0	5	10	1	11	0	9	1	0	9	0	2	11	3	2	0	0	0	0
13:00:00	39	4	5	23	8	15	5	0	2	1	0	5	1	7	0	19	0	0	7	0	2	1	12	1	10	7	28	14	8	0	0	1	5	1	4	0	4	2	0	2	0	1	2	25	0	0	19	7	0
13:30:00	30	5	24	7	2	4	8	0	1	10	0	21	0	22	0	15	2	0	0	1	2	0	9	1	9	3	6	1	6	4	0	0	0	0	3	0	8	1	0	0	0	0	0	3	12	0	0	4	0
14:00:00	22	0	1	5	6	4	16	10	4	9	19	0	0	3	0	0	0	0	0	1	2	0	3	5	13	0	14	16	25	24	0	0	14	15	15	32	3	2	4	0	0	0	0	15	0	0	0	2	0
14:30:00	28	0	15	6	3	10	13	52	5	11	0	10	0	5	19	0	0	0	0	1	1	0	4	0	3	1	4	6	1	46	0	0	0	0	2	12	1	0	20	0	1	0	0	11	0	0	0	0	0
15:00:00	16	0	40	3	0	7	2	10	0	2	0	1	0	6	3	0	0	4	0	13	0	0	15	0	1	0	0	4	0	93	0	0	0	0	3	32	1	0	34	0	0	9	0	0	0	0	0	0	0
15:30:00	27	0	0	0	0	10	2	3	0	0	2	1	1	2	15	2	0	0	0	5	0	1	4	0	5	0	11	4	13	37	0	0	0	1	7	21	44	0	7	0	0	16	13	10	54	0	0	0	0
16:00:00	6	0	0	0	4	4	9	6	0	7	3	0	0	1	32	0	8	0	0	16	0	0	8	14	5	0	9	19	1	46	0	23	8	2	4	0	12	4	8	0	17	4	5	4	67	0	8	0	0
16:30:00	23	0	0	0	1	4	0	29	0	0	0	0	0	2	25	0	3	0	0	2	0	0	0	57	5	2	3	5	1	25	0	13	5	11	2	0	10	2	20	0	2	0	2	4	0	12	23	0	20
17:00:00	16	0	0	15	1	9	0	0	18	2	19	0	0	26	0	2	0	0	0	8	0	0	0	0	14	19	14	5	2	0	0	2	5	1	4	0	1	0	10	0	0	0	1	33	0	11	0	0	2
17:30:00	35	0	0	37	7	37	2	14	1	0	1	2	0	1	14	0	0	0	0	0	5	1	0	27	6	23	3	9	0	39	0	0	4	0	2	0	36	0	8	0	5	0	14	9	0	0	0	0	0
18:00:00	17	0	0	10	7	20	2	13	0	0	0	5	0	3	28	4	0	13	0	6	19	0	17	9	25	26	27	0	24	0	1	7	17	2	1	0	40	1	21	0	4	18	0	5	0	0	0	0	0
18:30:00	16	0	4	43	3	17	5	0	0	4	0	0	0	3	0	6	0	2	0	4	6	0	0	4	18	13	24	4	22	6	0	2	13	5	3	0	31	0	35	0	0	7	6	16	0	0	0	0	4
19:00:00	18	0	5	26	3	11	22	0	22	1	4	6	4	0	0	9	0	22	0	4	14	0	0	4	15	11	18	26	4	45	0	12	12	2	5	2	15	0	0	6	7	7	11	4	0	0	0	0	1
19:30:00	21	1	2	21	7	14	17	28	10	13	18	2	10	23	0	13	1	17	0	9	12	2	0	32	29	15	8	17	14	13	32	12	17	20	22	0	24	1	1	2	7	12	5	10	0	7	0	0	0
20:00:00	29	26	7	33	8	17	10	28	31	25	17	7	18	18	0	41	0	11	0	12	14	6	18	30	37	24	27	17	32	9	29	7	16	26	19	0	27	24	15	73	11	14	18	29	5	18	0	28	38
20:30:00	79	34	49	63	48	58	35	52	49	60	17	12	35	45	45	31	28	34	31	33	54	59	47	55	37	31	62	50	29	49	57	28	37	29	42	46	40	21	61	50	10	42	9	32	58	26	24	32	47
21:00:00	47	23	17	37	21	39	21	44	28	37	17	0	26	19	0	29	5	20	9	15	15	4	26	37	28	2	31	9	18	55	12	38	21	4	41	55	33	14	64	9	0	17	0	19	15	0	10	16	37
21:30:00	39	10	5	14	24	12	24	44	13	12	1	0	11	13	0	0	0	39	4	8	6	0	8	18	25	0	4	4	20	10	4	27	11	2	27	22	13	18	81	0	0	0	0	3	32	0	26	57	32
22:00:00	30	2	11	0	29	14	11	38	13	6	0	0	1	14	0	0	0	6	16	10	0	0	7	0	13	0	0	0	17	0	0	18	3	0	25	25	0	0	38	0	0	10	0	0	32	0	2	0	44
22:30:00	19	0	8	0	11	0	8	17	14	0	0	0	0	9	0	0	21	0	14	3	0	0	14	0	9	0	0	0	1	0	0	0	0	0	27	91	0	0	4	0	0	1	0	29	37	0	4	0	0
23:00:00	10	0	12	0	7	0	2	5	0	0	0	6	0	18	0	0	6	10	10	0	0	0	11	0	15	0	0	0	8	0	0	0	0	0	20	37	0	0	20	0	0	16	0	5	8	0	0	0	0
23:30:00	4	0	0	0	3	0	22	5	0	0	0	6	0	7	0	0	1	0	4	7	0	0	13	10	5	0	0	0	5	0	0	2	19	0	9	44	0	0	0	0	0	0	0	0	4	0	0	0	0
00:00:00	11	0	0	0	0	0	14	15	0	0	0	0	0	9	0	0	0	9	30	2	0	0	0	0	1	0	0	0	0	0	0	0	14	0	7	0	0	0	0	0	0	9	0	0	0	0	0	17	0
00:30:00	8	0	0	4	11	0	16	0	0	0	0	4	0	43	0	0	4	1	2	0	0	2	0	0	1	0	0	1	12	0	0	0	4	15	3	0	0	3	0	0	0	39	0	0	0	0	0	0	0
01:00:00	2	0	0	0	8	0	8	12	0	0	0	0	0	26	0	0	9	3	0	19	0	2	0	0	1	0	0	0	18	0	0	0	42	0	7	11	8	0	0	0	0	4	0	0	0	0	28	0	0
01:30:00	3	0	0	12	15	0	6	15	0	0	0	19	0	21	0	0	50	7	0	12	0	0	0	0	2	0	0	0	30	0	0	0	0	7	3	6	5	0	0	0	0	0	0	0	0	0	0	0	0
02:00:00	6	0	0	0	20	0	8	1	1	0	0	0	0	12	0	0	0	0	0	2	0	0	0	0	0	13	0	0	34	0	28	0	0	29	5	0	0	0	0	0	0	4	0	0	0	0	0	0	0
02:30:00	7	45	0	38	1	0	0	24	0	2	0	10	23	0	0	0	0	8	0	0	0	0	0	0	1	15	13	0	0	0	2	0	0	2	4	10	0	0	0	2	0	8	0	0	0	0	0	0	0
03:00:00	8	1	0	0	10	0	0	6	0	30	0	3	12	11	0	0	0	0	0	0	0	8	0	0	0	0	49	0	1	0	0	0	0	0	0	7	0	2	0	0	6	0	0	7	8	39	0	0	0
03:30:00	2	0	0	0	6	0	0	0	3	0	0	6	3	2	0	0	0	0	0	0	0	0	12	0	5	0	35	0	0	0	0	0	0	0	0	20	0	0	18	0	0	6	0	22	58	6	0	0	0
04:00:00	19	2	0	0	8	0	0	0	0	27	0	15	0	0	0	0	5	0	35	0	0	0	0	0	3	13	5	0	2	0	0	0	0	27	0	1	0	0	0	0	0	0	0	0	0	0	0	26	0
04:30:00	5	0	0	0	3	0	3	0	0	0	0	0	0	29	0	0	4	0	0	0	0	0	0	17	0	5	9	0	0	0	0	0	0	0	0	9	0	0	0	0	0	0	0	0	0	0	0	11	0
05:00:00	6	0	0	0	40	0	13	0	0	0	0	0	0	6	0	0	10	0	0	0	0	0	0	33	6	0	15	0	0	0	0	0	0	0	19	0	0	0	0	0	0	0	0	0	0	0	0	0	0
05:30:00	12	1	0	31	13	0	0	0	0	0	0	0	0	25	0	38	0	0	24	0	0	0	0	22	11	0	4	0	0	0	0	0	0	0	13	28	0	0	0	0	0	10	0	0	0	0	0	0	0
06:00:00	8	0	0	0	19	0	0	0	5	14	0	0	0	0	0	2	0	0	17	0	0	0	0	5	9	0	22	18	25	0	0	0	0	0	2	1	18	0	0	0	6	0	0	0	0	0	0	0	0
06:30:00	14	0	7	0	9	0	0	5	0	0	0	0	6	14	0	0	0	0	7	0	11	0	2	23	2	31	24	16	29	0	0	5	0	14	12	17	25	0	0	0	0	0	6	0	0	0	0	0	34
07:00:00	15	0	0	0	10	0	0	0	0	0	0	0	0	14	6	0	0	0	5	0	9	0	2	20	2	25	0	17	19	0	0	3	0	0	0	38	22	0	0	0	0	0	12	0	7	0	52	4	72
07:30:00	23	0	2	35	20	0	0	0	0	0	6	10	26	13	17	0	0	0	0	0	15	1	24	15	9	28	0	10	27	0	1	11	0	16	0	22	15	17	0	0	6	3	1	27	0	0	3	26	59
08:00:00	14	0	3	21	13	0	11	32	0	0	3	4	22	14	0	0	16	5	10	0	12	1	16	12	22	0	7	7	19	7	7	16	0	27	13	0	13	0	0	0	11	0	15	0	0	13	0	7	28
	26	0	0	28	4	12	6	19	5	13	10	14	4	14	0	5
	35	8	0	26	10	8	18	30	11	10	9	9	16	14	1	31
	31	11	0	21	3	11	20	13	18	14	5	30	20	17	43	24
[truncated: 250 more columns]

## Sheet: Fig 6 S2 B (HFD TSC1 RNAi)
FED(TSC1 RNAi~BD-AD-AKHR)	M20-3.11															M21-3.11																M28-3.12										M29-3.12							+sucrose
20:30:00	70	73	32	44	59	56	38	54	80	29	67	47	67	58	66	35	29	55	31	40	37	39	43	38	59	37	38	32	33	35	40	33	49	34	41	67	45	41	3	46	39	50	41	34	32	28	44		44.4255
21:00:00	63	51	33	59	31	43	12	55	34	2	42	53	74	52	32	44	37	52	14	33	47	29	28	3	36	20	38	27	51	26	56	34	12	42	57	45	55	50	0	33	75	14	38	29	46	34	45		38
21:30:00	32	29	57	12	31	25	7	23	13	0	31	38	34	57	25	45	14	53	9	38	52	8	46	0	49	8	29	28	29	45	63	55	57	18	54	45	51	63	21	33	96	20	40	74	49	41	68		36.4894
22:00:00	50	45	8	25	28	38	19	27	32	21	24	25	35	61	75	42	14	46	10	22	43	41	37	9	32	17	31	19	26	33	60	15	11	48	14	27	34	43	0	46	51	11	34	15	29	9	20		29.8298
22:30:00	47	40	27	33	27	71	22	35	30	13	56	46	41	53	12	52	17	57	8	30	35	23	40	13	40	1	19	5	19	14	30	0	0	0	0	0	0	49	0	0	15	0	14	0	0	0	0		22
23:00:00	33	14	74	14	22	22	21	27	12	4	28	35	61	49	0	22	6	54	5	29	47	14	34	0	24	9	40	0	15	24	32	0	1	0	5	30	24	1	3	8	11	0	32	0	12	0	17		19.4681
23:30:00	32	18	45	19	17	43	0	14	6	0	28	30	42	48	9	27	3	42	10	29	18	80	14	7	20	4	15	14	14	36	34	14	0	10	9	32	6	16	0	8	40	0	25	1	5	1	16		19.1702
00:00:00	26	16	3	0	13	29	14	23	22	0	13	22	19	30	5	15	11	27	0	43	30	6	32	6	19	2	22	2	4	31	23	0	0	0	0	8	3	32	0	0	0	0	54	0	17	0	0		13.234
00:30:00	25	23	25	13	17	38	26	5	20	4	4	24	20	38	2	25	3	35	10	29	9	5	31	6	10	2	12	1	15	38	21	11	38	0	6	47	5	32	0	0	34	0	24	23	2	16	19		16.8723
01:00:00	33	36	36	13	9	26	0	17	11	6	13	5	6	27	0	41	20	29	13	15	36	0	5	3	26	16	20	16	15	35	29	0	46	0	0	0	33	0	10	28	0	0	3	0	0	0	0		14.4043
01:30:00	23	13	18	11	38	22	4	10	32	2	54	16	0	21	0	45	5	19	6	15	17	0	3	0	14	2	17	0	0	26	13	0	1	0	0	9	1	0	9	1	0	0	22	0	0	0	0		10.4043
02:00:00	19	15	0	10	21	49	26	12	15	2	6	27	49	16	21	25	4	22	2	13	6	14	2	14	18	2	2	6	8	19	8	0	0	0	0	0	4	0	1	0	0	0	14	0	1	0	4		10.1489
02:30:00	19	10	14	2	30	17	14	8	13	2	8	14	0	28	0	31	7	32	8	19	25	15	11	9	17	0	17	6	8	13	10	0	4	0	0	11	11	0	0	0	39	13	21	0	0	0	19		11.1702
03:00:00	13	3	4	14	8	25	15	8	17	2	20	18	35	12	9	27	2	23	4	23	41	39	4	6	18	7	17	9	10	16	22	0	0	0	0	0	2	0	0	0	23	3	0	0	0	0	0		10.617
03:30:00	20	11	5	2	10	11	0	36	34	4	8	18	20	7	0	22	6	8	12	16	12	24	3	0	12	6	14	10	12	9	7	0	13	0	0	18	6	23	0	0	0	0	29	29	0	0	0		10.1489
04:00:00	16	5	43	10	15	8	8	8	19	4	2	12	0	18	0	17	0	5	6	9	9	5	9	9	14	2	8	7	16	9	11	0	1	4	0	0	0	11	8	0	0	0	13	25	0	0	0		7.78723
04:30:00	9	12	0	6	19	10	7	5	2	2	0	9	15	13	0	8	10	8	1	12	0	8	4	2	9	2	24	6	2	13	9	0	20	0	0	2	13	0	0	0	23	0	14	79	0	0	22		8.51064
05:00:00	0	12	0	9	9	0	0	7	7	0	38	30	20	8	0	11	0	0	6	4	18	6	0	0	17	0	0	2	0	8	3	0	10	6	11	21	23	0	2	0	0	0	32	9	37	0	25		8.31915
05:30:00	28	47	0	5	4	11	7	2	6	5	11	12	19	7	0	27	2	25	5	12	2	2	5	0	5	8	19	8	38	18	3	0	0	0	20	5	0	26	2	0	13	20	17	13	16	0	26		10.6596
06:00:00	0	11	0	11	22	30	24	6	12	6	11	9	10	19	0	19	6	6	4	3	14	12	0	0	14	0	12	4	23	5	0	0	0	0	0	0	0	0	0	0	0	0	0	0	0	0	0		6.23404
06:30:00	0	2	0	0	15	0	0	16	9	0	2	6	17	9	0	10	0	10	3	20	9	3	12	0	9	0	0	18	7	5	8	0	4	0	0	9	3	0	0	25	36	0	18	12	0	0	23		6.80851
07:00:00	11	13	28	11	7	4	0	18	36	4	0	7	15	23	26	19	2	20	10	7	18	9	0	8	3	0	18	8	14	10	9	53	41	0	0	0	0	52	0	0	19	0	56	7	21	0	1		12.9362
07:30:00	21	15	12	5	4	7	15	45	16	10	38	25	33	27	7	16	6	10	7	10	4	2	17	10	24	7	6	4	16	5	19	25	0	6	9	20	16	49	0	0	0	0	24	7	0	21	11		13.4255
08:00:00	4	9	6	0	1	27	22	5	5	6	0	15	16	33	10	13	7	6	7	11	12	7	0	9	11	11	14	12	3	6	2	2	21	35	14	37	60	41	0	7	40	0	12	30	0	39	15		13.6809
08:30:00	40	23	12	29	33	21	42	29	23	25	15	29	15	43	30	34	19	13	14	14	20	15	8	15	13	10	17	16	15	18	9	46	38	0	23	21	37	46	28	10	41	16	14	36	36	29	14		23.2766
09:00:00	35	32	10	15	17	9	0	23	0	20	9	38	12	25	12	20	5	0	15	21	8	8	2	6	24	9	0	17	17	3	9	66	18	6	24	31	32	27	4	6	21	8	14	15	47	32	12		16.6809
09:30:00	33	29	16	2	10	15	0	5	2	16	15	27	10	29	8	37	11	14	2	7	6	5	2	9	8	5	31	17	12	1	12	9	1	0	6	15	12	6	0	0	2	0	6	14	13	44	9		11.3404
10:00:00	28	30	12	0	22	24	0	16	13	19	10	30	30	13	12	27	15	6	10	9	5	0	0	7	17	2	15	11	5	12	5	11	2	0	8	17	8	9	3	0	14	0	0	12	18	43	15		12.0213
10:30:00	29	16	0	0	18	9	8	2	0	6	2	24	22	21	13	30	5	0	6	10	4	3	0	0	15	4	0	11	0	12	4	41	17	2	25	20	18	33	15	12	18	0	8	4	1	48	10		11.617
11:00:00	27	6	9	0	11	21	12	16	12	14	6	23	11	13	13	32	9	7	15	0	4	0	4	1	5	2	5	11	0	7	2	27	35	0	8	2	20	12	14	10	28	0	71	39	7	22	14		12.9149
11:30:00	21	15	11	12	1	21	0	3	4	11	7	33	12	7	13	28	4	9	6	0	2	6	2	0	17	0	0	8	4	6	11	45	9	0	14	13	6	17	0	2	18	8	5	21	16	30	15		10.4894
12:00:00	34	20	12	4	9	19	0	2	0	0	6	49	13	13	8	34	7	6	5	15	17	7	5	1	5	0	16	13	14	0	2	22	6	0	2	0	12	0	6	0	25	5	1	0	9	31	8		9.85106
12:30:00	22	5	0	0	8	11	0	0	0	12	1	13	8	0	8	28	8	8	8	1	0	2	7	14	8	0	6	7	2	0	10	12	6	0	3	19	6	0	0	0	14	10	1	4	14	23	10		6.78723
13:00:00	10	0	0	0	2	0	0	0	13	11	6	58	0	7	5	10	0	4	7	0	0	0	3	0	2	0	14	6	0	0	0	5	8	0	0	1	12	13	11	0	20	6	3	21	0	16	14		6.12766
13:30:00	25	11	0	0	13	0	0	6	0	7	5	14	7	2	20	2	5	0	0	0	0	0	0	3	19	0	3	2	0	0	0	0	0	0	0	0	0	30	2	0	0	0	0	15	40	9	14		5.40426
14:00:00	9	11	0	0	0	9	0	0	0	10	0	11	4	0	3	4	0	2	2	0	0	0	1	0	0	0	0	19	2	18	0	0	0	0	17	0	0	0	0	0	0	0	0	3	5	14	24		3.57447
14:30:00	8	0	0	0	0	2	0	0	0	3	8	7	8	17	8	4	0	0	2	0	0	0	0	0	0	0	0	8	4	22	0	0	0	0	19	0	0	0	11	0	0	0	35	0	11	12	11		4.25532
15:00:00	25	0	0	0	6	4	0	19	0	9	3	15	2	0	4	5	0	31	5	0	0	0	2	0	20	0	0	3	0	1	0	0	0	0	6	0	0	0	17	0	0	0	10	0	0	5	6		4.21277
15:30:00	4	11	0	0	14	11	0	3	46	8	0	18	0	0	10	0	0	3	6	0	0	7	0	0	0	0	0	12	0	1	0	0	0	0	0	0	0	0	1	0	0	0	0	0	17	7	15		4.12766
16:00:00	18	8	0	0	3	3	0	0	30	4	10	11	4	14	13	4	20	9	3	4	2	3	3	0	6	0	0	5	5	20	0	0	0	0	7	0	0	0	3	0	0	0	0	0	0	22	10		5.19149
16:30:00	14	27	36	0	42	36	15	7	27	13	34	30	24	35	30	39	11	26	25	35	52	43	9	15	15	14	17	15	20	34	21	0	2	0	0	0	0	0	4	35	0	0	0	0	0	2	7		17.2553
17:00:00	22	1	6	0	22	1	0	3	6	2	13	30	7	0	36	18	6	10	1	9	11	2	3	1	12	3	4	5	1	30	21	41	17	13	12	25	13	33	5	20	26	0	17	17	19	14	18		12.2553
17:30:00	18	23	37	15	36	27	12	20	15	8	31	54	14	20	24	32	16	29	14	34	28	23	15	5	16	16	38	17	16	50	16	17	10	17	8	11	0	17	0	0	21	0	8	46	36	0	22		19.8298
18:00:00	18	13	14	0	0	0	0	0	22	2	5	26	4	0	9	28	9	11	4	13	24	6	11	3	3	0	17	2	10	17	8	27	1	0	0	11	4	14	20	0	0	0	0	6	5	0	18		8.19149
18:30:00	13	2	5	0	11	15	0	0	0	10	12	32	0	6	7	26	2	9	11	9	16	2	2	0	5	0	4	14	2	13	8	19	1	0	0	12	8	0	0	0	17	0	0	0	29	2	11		7.12766
19:00:00	9	7	11	0	15	17	0	0	5	7	4	21	0	0	12	25	16	19	15	4	23	8	6	10	12	0	2	10	2	15	10	0	0	0	0	0	0	0	0	0	0	0	0	0	60	8	4		7.59574
19:30:00	24	20	17	0	28	27	0	12	11	13	7	26	4	6	41	47	10	19	18	9	31	6	4	5	6	10	4	14	7	20	10	0	3	0	0	1	0	0	3	0	0	0	2	4	23	3	2		10.5745
20:00:00	25	25	38	0	29	21	11	18	21	15	13	28	4	17	29	32	21	16	18	13	37	7	7	12	12	12	16	25	3	26	18	38	19	15	33	21	22	6	12	21	49	0	32	12	29	22	28		19.7447
20:30:00	35	25	28	53	59	26	35	27	23	18	44	41	20	17	28	63	19	61	35	38	55	24	24	27	42	27	32	34	34	33	48	61	49	52	46	44	49	49	11	32	43	0	29	38	38	53	36		36.2766
21:00:00	52	25	14	34	35	23	24	31	24	12	32	46	34	32	42	50	28	50	20	28	48	25	29	10	42	16	20	25	16	48	40	48	27	36	34	45	50	44	61	34	55	0	45	64	43	49	41		34.7021
21:30:00	51	17	24	30	54	64	19	18	79	4	23	56	26	49	43	54	22	48	14	37	50	29	30	20	43	10	29	28	26	42	42	34	32	21	29	41	49	49	16	33	45	0	31	55	31	56	37		34.8936
22:00:00	36	3	21	2	15	15	4	10	6	0	17	34	14	17	23	45	12	42	20	18	27	12	19	4	33	6	25	13	21	33	34	39	4	2	10	25	25	22	9	16	20	0	40	17	11	17	50		18.8936
22:30:00	0	0	0	0	0	0	0	0	0	0	0	0	0	0	0	6	0	0	0	0	0	0	4	0	0	0	0	0	0	7	4	19	0	0	5	3	15	7	0	0	0	0	41	6	0	1	5		2.61702
23:00:00	13	7	0	0	0	8	0	9	7	21	20	13	20	1	0	36	0	69	21	0	17	10	9	0	25	5	5	2	0	12	7	49	0	0	0	0	0	0	7	0	1	0	0	0	0	0	0		8.38298
23:30:00	10	0	0	0	18	7	0	13	34	8	2	4	26	5	0	35	11	38	9	3	20	6	17	0	33	3	3	2	7	17	26	0	0	0	0	0	0	0	0	49	35	0	4	0	0	0	0		9.46809
00:00:00	5	11	0	0	3	4	9	0	0	11	0	4	2	7	0	25	0	9	0	0	0	0	4	0	7	9	0	0	3	1	0	0	0	0	0	0	0	0	0	8	1	0	9	0	0	6	0		2.93617
00:30:00	16	23	31	36	25	29	36	31	33	12	18	20	33	37	21	31	22	28	16	20	19	10	9	11	26	12	18	7	14	19	19	32	0	0	0	0	0	7	0	0	9	0	17	0	0	0	0		15.8936
01:00:00	0	0	0	0	6	0	0	0	14	0	0	0	2	0	0	13	12	2	0	0	0	0	2	0	0	0	0	0	0	0	0	22	0	0	0	0	0	19	8	23	0	0	23	0	0	7	0		3.25532
01:30:00	0	1	0	0	6	0	0	1	13	0	0	0	0	0	0	7	0	0	0	0	0	13	0	0	0	0	0	0	0	17	0	0	0	0	0	0	0	0		0	9	0	8	0	0	12	0		1.8913
02:00:00	12	0	0	1	7	0	0	0	0	20	0	0	10	1	0	0	0	10	0	0	11	15	2	0	11	0	3	0	5	8	2	0	0	0	0	0	0	0		0	27	0	31	0	0	4	0		3.91304
02:30:00	28	1	12	11	59	4	11	0	0	9	0	0	7	10	0	15	53	15	17	13	15	7	12	13	8	0	10	8	11	25	23	0	0	0	19	0	0	0		0	29	0	6	0	0	3	0		9.86957
03:00:00	0	0	0	0	0	0	0	0	0	4	0	0	0	0	0	0	0	0	17	0	0	0	25	0	0	0	0	1	0	0	0	0	0	0	0	0	0	0		0	8	0	0	0	0	26	19		2.17391
03:30:00	32	0	0	0	8	0	0	38	0	4	42	0	14	4	0	9	0	24	2	0	12	17	7	0	24	0	8	6	13	15	7	0	0	0	0	0	0	0		0	2	0	0	0	0	0	21		6.71739
04:00:00	0	0	0	0	0	0	0	0	0	0	3	0	0	0	0	3	0	0	0	0	0	0	0	0	0	0	0	2	0	0	0	0	0	0	0	0	0	0		0	0	0	0	0	0	25	0		0.717391
04:30:00	5	8	0	4	3	5	0	0	0	9	0	0	0	1	0	19	0	35	2	0	5	4	0	0	14	0	0	5	5	12	0	41	0	0	0	0	0	0		0	3	0	0	0	0	0	0		3.91304
05:00:00	27	0	12	23	9	20	0	0	26	3	0	39	0	53	39	14	0	29	20	27	15	12	13	10	29	10	17	34	14	8	4	23	3	0	0	0	0	0		0	0	0	0	0	0	37	0		12.3913
05:30:00	0	0	9	0	6	9	0	0	6	2	6	13	40	13	22	14	0	13	4	10	16	3	7	4	83	0	17	5	3	8	15	0	0	0	0	0	0	0		0	0	0	0	0	22	10	0		7.82609
06:00:00	0	0	0	0	0	0	0	0	0	0	5	0	0	8	0	22	0	0	0	0	0	0	0	0	0	0	0	0	0	0	0	41	0	0	0	0	14	0		0	0	0	0	0	14	63	0		3.63043
06:30:00	23	4	0	0	4	0	0	30	0	8	28	26	26	45	0	19	3	25	13	23	16	20	0	0	20	11	12	13	24	15	11	23	0	0	0	37	24	0		0	42	0	28	0	0	1	0		12.4783
07:00:00	1	14	0	41	13	11	0	1	74	2	22	9	11	20	0	4	20	5	0	19	4	3	0	0	12	0	4	2	2	11	11	19	11	50	12	36	49	53		31	35	0	61	18	38	41	55		17.9348
07:30:00	16	11	9	6	14	8	0	10	31	4	9	15	15	21	18	28	7	16	10	11	17	7	7	0	23	2	15	10	13	10	20	45	4	15	0	21	31	40		16	12	0	30	13	3	35	24		14.6087
08:00:00	22	19	4	13	2	8	0	17	9	0	8	14	13	43	20	24	5	19	18	27	14	11	18	14	41	2	59	2	15	22	22	47	9	0	20	23	56	36		15	30	0	55	17	22	34	16		19.2391
08:30:00	30	32	45	24	40	47	17	52	33	26	36	55	28	38	56	40	31	27	20	14	46	19	5	20	25	20	39	29	24	32	18	25	17	26	19	26	25	19		14	26	0	14	18	34	24	30		27.9348
09:00:00	23	34	22	22	34	34	5	36	27	15	29	63	27	38	35	43	24	31	13	26	29	13	14	24	37	14	30	34	27	27	29	58	6	12	28	27	30	35		11	40	0	38	21	37	41	25		27.5652
09:30:00	29	34	17	6	23	23	0	34	17	16	19	64	34	32	14	34	19	27	19	19	33	9	7	8	14	7	19	38	12	11	12	44	13	22	10	32	28	25		6	38	0	39	31	17	45	26		22.3043
10:00:00	34	25	13	10	28	17	7	30	25	4	5	37	20	43	21	43	16	9	18	18	12	19	11	5	7	4	20	28	7	29	22	22	10	8	16	3	14	19		0	22	0	8	2	10	15	33		16.7174
10:30:00	16	17	11	0	22	26	1	67	13	12	9	42	25	31	13	26	17	16	12	14	15	11	5	10	12	4	21	12	7	29	13	16	4	8	6	9	11	12		5	23	0	13	6	15	29	14		15.2174
11:00:00	33	17	21	11	21	32	8	25	0	18	12	43	23	23	30	31	12	34	13	27	17	19	2	8	13	14	22	42	9	27	30	32	10	6	9	8	19	13		7	26	0	1	10	10	22	13		17.8913
11:30:00	21	12	18	1	25	26	0	29	17	12	11	43	22	26	31	30	15	23	21	20	10	8	9	3	9	18	25	21	2	26	22	26	2	1	10	15	11	8		4	27	0	4	8	11	16	16		15.5435
12:00:00	19	2	5	0	14	13	0	31	0	23	8	60	21	8	14	33	14	8	2	3	6	4	6	0	5	4	12	27	0	20	20	14	3	1	3	12	5	8		0	10	0	0	2	8	17	14		10.413
12:30:00	10	12	10	8	2	23	0	24	16	2	4	30	10	11	24	20	12	13	3	13	7	5	6	1	5	3	8	12	0	17	14	4	3	0	6	2	5	8		2	26	0	3	0	5	21	22		9.3913
13:00:00	13	2	9	0	1	5	0	5	14	20	7	21	13	4	15	12	2	7	1	7	8	0	6	3	0	4	8	6	0	14	13	2	0	7	5	2	3	1		7	10	0	0	7	2	13	23		6.56522
13:30:00	4	0	3	0	11	0	0	3	0	5	3	20	14	5	19	29	0	5	11	0	22	11	8	10	0	0	2	18	2	12	9	7	5	2	2	3	3	0		5	4	0	0	5	11	6	38		6.8913
14:00:00	5	0	5	0	33	0	0	23	0	1	1	13	11	0	21	16	1	0	0	0	20	0	2	0	12	0	0	7	0	12	5	20	13	14	4	20	14	31		8	17	0	23	20	21	12	48		9.84783
14:30:00	9	22	0	0	13	0	0	36	24	3	13	12	18	8	18	6	17	0	0	0	44	0	3	2	5	3	0	14	0	12	16	17	4	10	0	42	14	17		4	23	0	16	29	20	18	18		11.5217
15:00:00	10	0	7	0	6	0	0	24	5	0	4	28	18	8	23	0	2	0	16	0	28	0	20	9	0	0	0	26	0	11	3	8	2	0	0	0	1	0		3	15	0	0	6	5	7	8		6.58696
15:30:00	9	0	17	0	6	0	0	16	21	2	2	18	8	16	34	0	0	15	2	0	3	0	17	0	0	0	6	10	15	13	5	1	2	0	0	0	2	0		1	11	0	2	2	0	0	3		5.63043
16:00:00	10	16	9	0	11	0	0	24	15	0	2	17	18	17	6	0	0	6	2	0	0	0	2	1	0	0	15	4	1	16	5	6	2	6	0	0	0	0		2	0	0	0	2	0	9	32		5.56522
16:30:00	11	0	11	0	2	0	0	20	35	0	6	14	10	4	14	22	29	3	26	0	0	0	3	3	26	0	2	12	6	6	2	1	0	0	0	9	1	0		0	1	0	3	3	17	4	18		7.04348
17:00:00	11	25	28	18	26	26	18	24	6	2	12	20	14	18	19	22	4	6	9	25	37	14	14	0	5	6	16	12	6	15	10	1	0	0	1	3	0	0		0	5	0	12	3	0	8	6		11.0217
17:30:00	12	14	16	10	22	31	0	8	22	8	19	40	25	6	30	14	19	18	14	14	40	6	17	0	6	26	2	15	6	23	10	0	0	0	1	0	6	0		2	2	0	26	0	19	4	21		12.4783
18:00:00	22	10	2	0	12	7	7	25	29	2	0	26	28	18	23	11	8	14	13	10	17	2	14	12	11	12	4	32	0	20	12	0	3	0	5	5	0	0		0	0	0	61	25	56	3	11		12.4348
18:30:00	16	21	12	0	15	26	0	0	9	6	7	32	14	33	15	2	4	4	6	5	29	4	11	7	4	4	5	25	2	28	12	0	1	0	5	17	1	0		3	35	0	37	22	29	0	12		11.3043
19:00:00	13	14	8	0	14	21	10	23	18	9	7	46	14	34	27	8	5	13	8	11	33	0	18	0	6	6	22	29	0	23	6	35	6	0	4	24	14	0		12	40	0	31	11	8	0	45		14.6957
19:30:00	19	6	21	0	29	21	6	28	18	8	9	25	7	36	28	23	16	29	20	7	29	8	11	8	16	14	4	27	19	16	12	28	20	19	18	19	27	16		18	28	0	18	23	23	8	17		17.4348
20:00:00	18	43	38	34	20	43	10	49	24	22	31	43	10	24	77	35	17	31	16	27	70	13	13	29	12	30	15	31	15	31	31	56	24	25	20	22	38	24		16	31	0	25	33	34	65	30		29.2391
20:30:00	36	36	54	36	31	42	46	39	15	21	40	42	42	32	47	48	17	40	38	37	34	35	40	21	22	32	24	21	31	37	38	66	37	25	73	38	39	26		32	39	0	64	41	55	47	63		37.3696
21:00:00	34	15	21	19	31	37	25	32	21	13	39	31	27	37	47	58	22	48	39	26	48	26	26	11	36	23	26	24	28	32	39	53	20	35	43	41	47	39		27	58	0	49	55	15	53	42		33
21:30:00	52	23	40	29	33	32	17	35	19	7	30	45	25	45	32	43	19	70	34	29	34	26	26	14	43	16	32	28	22	44	38	38	22	15	32	57	28	30		25	39	0	28	67	39	47	50		32.587
22:00:00	23	3	2	2	26	29	3	17	8	0	18	9	34	19	21	39	11	63	29	9	48	13	21	0	55	20	20	18	1	33	21	44	12	8	20	37	30	45		25	38	0	44	43	49	61	32		23.9783
22:30:00	6	0	1	0	8	0	0	5	2	0	40	0	8	8	31	7	0	16	5	3	25	0	3	0	16	1	5	0	0	2	5	20	10	9	21	40	30	32		27	33	0	41	36	24	20	37		12.5435
23:00:00	2	9	0	0	0	0	0	0	0	0	31	17	6	0	4	0	0	17	2	0	0	0	7	3	0	4	0	0	0	2	0	4	2	0	2	1	14	13		8	14	0	7	4	2	1	2		3.86957
23:30:00	1	28	0	0	0	0	0	23	0	0	22	19	17	0	58	0	0	4	0	0	0	0	2	0	7	0	0	0	0	0	0	0	0	0	0	0	0	0		17	0	0	2	0	0	0	0		4.34783
00:00:00	0	40	0	0	0	0	0	19	0	0	37	0	23	0	23	1	0	0	11	0	0	0	4	0	0	0	10	0	0	0	0	0	0	0	0	0	0	0		56	1	0	31	0	0	0	18		5.95652
00:30:00	0	9	0	0	0	0	0	30	0	0	17	0	14	0	17	1	12	0	12	0	0	0	5	0	2	0	0	0	0	0	0	0	0	0	0	12	0	0		25	10	0	48	0	0	0	25		5.19565
01:00:00	11	15	0	0	0	0	0	9	32	62	0	0	5	50	37	2	19	16	2	0	0	0	2	0	5	0	0	0	0	0	0	0	0	0	0	6	0	60		15	0	0	7	0	0	0	24		8.23913
01:30:00	8	0	0	0	0	0	0	15	19	19	0	0	2	0	12	27	0	40	16	0	0	0	6	0	0	0	3	0	0	8	0	0	2	0	0	34	0	11		37	10	0	1	0	0	0	33		6.58696
02:00:00	0	0	4	0	0	0	0	7	26	0	0	0	23	0	0	1	0	21	13	0	0	0	12	0	2	1	0	0	0	15	0	9	0	0	0	41	0	43		0	0	0	16	0	0	0	2		5.13043
02:30:00	0	0	32	0	0	0	0	26	22	15	0	0	3	0	0	0	0	12	25	0	6	0	22	0	0	1	0	0	11	2	0	0	1	0	0	14	0	0		0	33	0	0	0	0	0	0		4.8913
03:00:00	0	0	19	0	0	0	0	0	10	27	0	0	3	0	6	0	0	0	5	34	0	14	7	12	1	0	0	10	0	0	0	0	0	0	0	0	0	0		0	46	0	18	0	0	0	0		4.6087
03:30:00	0	0	6	0	0	0	0	0	12	13	0	0	3	0	15	0	11	25	10	14	0	30	7	7	2	0	0	10	0	0	0	1	0	0	0	0	0	0		0	4	0	0	0	0	0	15		4.02174
04:00:00	0	0	0	0	0	0	0	0	4	4	0	0	0	0	0	0	5	0	0	0	1	24	4	0	11	0	0	11	0	15	9	26	0	0	0	0	0	0		0	0	0	0	0	0	0	0		2.47826
04:30:00	21	0	0	0	0	0	0	0	0	0	0	0	11	0	0	2	10	0	0	6	0	1	2	0	19	0	0	9	0	31	39	0	0	0	0	0	0	0		0	13	0	0	0	0	0	0		3.56522
05:00:00	7	0	0	0	0	0	0	0	0	0	10	0	24	25	0	2	26	6	0	2	0	0	7	0	71	0	0	0	0	19	13	0	0	0	0	0	0	0		0	0	0	0	0	0	0	17		4.97826
05:30:00	0	0	20	0	0	0	0	0	5	0	27	0	0	19	0	0	3	6	0	0	0	3	11	0	10	0	0	31	20	0	19	10	1	20	0	0	0	0		0	0	0	0	0	19	53	9		6.21739
06:00:00	0	0	6	0	6	0	0	0	8	2	2	8	0	35	0	0	2	19	23	0	22	0	7	0	0	0	0	23	13	0	0	52	0	14	0	0	8	0		0	0	0	0	0	1	41	13		6.63043
06:30:00	20	0	1	0	9	0	0	0	0	0	0	28	13	6	0	0	0	0	0	0	14	18	5	0	14	6	62	2	0	0	24	38	0	23	0	19	23	56		22	24	0	0	0	21	12	0		10
07:00:00	13	59	26	49	55	37	0	35	16	10	19	38	49	40	26	42	15	44	35	36	82	28	28	33	53	20	33	30	27	37	27	44	0	13	1	44	33	29		13	46	0	36	0	22	0	35		29.5217
07:30:00	21	40	16	0	22	0	0	21	14	5	5	21	29	31	11	31	10	39	28	27	44	14	11	0	39	5	15	20	24	29	26	32	4	8	0	34	38	28		22	42	0	45	21	27	31	35		20.9783
08:00:00	14	9	13	9	21	10	15	35	22	10	42	40	26	37	19	27	16	31	17	26	20	8	10	9	27	7	24	18	37	23	21	35	20	1	38	38	39	27		19	39	0	37	32	26	20	28		22.6522
[truncated: 248 more columns]

## Sheet: Fig 6 S3 A (ND AMPK-DN)
FED(AMPK-DN~BD-AD-AKHR)	M20-3.17																M21-3.17														M34-3.12															M37-3.12
20:30:00	66	91	64	73	76	67	74	108	100	84	76	70	76	54	67	69	83	103	63	58	67	52	60	69	67	38	42	49	58	48	69	89	74	57	58	48	70	42	83	47	86	76	67	90	38	91	58	68	40
21:00:00	4	35	1	51	125	4	50	37	82	68	28	42	9	57	10	26	56	89	35	44	60	23	38	28	65	21	31	32	37	43	60	82	69	52	56	39	69	20	61	36	90	59	46	87	32	91	54	71	30
21:30:00	0	0	0	41	0	4	7	13	11	14	31	0	0	47	0	0	25	62	6	17	46	0	8	2	22	0	0	39	31	21	31	51	47	34	56	32	42	25	63	51	68	60	24	57	37	84	48	55	56
22:00:00	0	0	8	43	3	0	0	0	0	0	0	0	0	59	1	0	1	55	0	0	70	0	0	0	0	0	0	23	33	0	2	3	21	25	7	9	0	0	15	22	38	22	18	46	7	80	2	6	12
22:30:00	0	0	11	23	0	0	0	0	0	0	0	0	0	18	0	0	0	37	0	0	27	0	0	0	2	0	0	2	10	0	0	0	0	0	0	0	0	0	2	0	0	8	0	0	0	4	0	0	0
23:00:00	0	11	0	0	0	0	0	0	0	0	0	0	0	0	0	0	0	32	0	0	0	0	0	0	0	0	0	6	0	0	0	0	0	0	0	0	0	0	30	0	0	10	0	0	0	0	0	0	0
23:30:00	0	5	0	0	0	0	0	0	0	0	1	0	0	0	0	0	20	35	0	0	0	0	0	0	1	0	0	3	3	0	0	0	0	0	0	0	0	0	0	0	0	0	0	0	0	0	0	0	0
00:00:00	2	17	16	0	0	0	6	4	0	0	0	0	7	0	3	0	0	72	0	0	0	0	0	9	0	0	0	0	44	0	0	0	0	0	0	0	0	0	0	0	0	0	0	0	0	0	0	0	0
00:30:00	0	0	1	2	0	0	0	0	0	0	3	0	0	0	0	0	0	40	0	0	0	0	0	27	0	0	0	0	30	0	0	60	0	0	0	0	0	0	0	36	0	0	0	87	0	0	0	0	0
01:00:00	8	0	14	0	0	0	0	0	0	0	9	0	0	0	29	0	0	43	0	0	0	0	0	0	0	11	0	3	22	0	0	71	0	0	0	0	0	0	0	31	0	0	0	67	0	0	0	0	0
01:30:00	0	0	19	0	0	0	63	95	0	0	3	0	0	0	0	0	0	13	0	0	0	2	0	0	7	12	0	2	5	0	0	0	0	0	0	0	6	0	0	46	0	0	0	38	0	0	0	0	0
02:00:00	5	0	0	0	0	0	56	86	0	0	0	0	12	55	62	0	0	0	0	0	0	11	0	0	0	0	0	18	0	0	0	0	0	0	0	0	0	0	0	14	0	0	0	0	0	0	0	0	0
02:30:00	0	0	3	0	0	0	53	29	0	5	6	0	0	67	38	0	80	0	0	0	0	0	0	0	0	0	0	2	3	0	0	0	0	0	0	0	59	0	0	0	0	0	0	0	0	0	3	0	0
03:00:00	12	0	15	0	0	5	9	0	0	67	0	0	0	45	25	0	47	0	0	0	18	0	0	0	0	0	2	2	0	0	3	0	0	0	0	0	8	0	0	0	0	0	0	0	0	0	27	0	0
03:30:00	0	0	22	0	59	0	0	0	45	51	0	0	0	32	35	0	37	0	0	0	52	0	0	0	0	0	57	4	0	0	9	0	0	0	0	0	9	0	0	0	0	0	0	0	0	0	0	0	0
04:00:00	7	0	8	0	114	0	10	0	66	42	0	35	0	39	17	12	29	0	0	0	25	0	0	0	0	0	45	2	31	0	0	0	0	0	0	0	2	0	0	0	0	0	0	0	0	0	0	0	0
04:30:00	0	0	52	0	74	7	1	0	53	0	0	37	0	0	0	0	16	0	0	0	33	0	0	0	0	0	0	0	21	0	2	0	0	0	0	0	5	0	0	0	0	0	0	0	0	0	0	0	0
05:00:00	19	18	58	0	60	3	5	0	38	0	50	1	0	0	0	0	15	0	0	0	0	39	0	0	0	0	0	0	16	0	0	0	0	0	0	0	0	0	0	76	0	0	5	0	0	0	0	0	0
05:30:00	52	65	36	25	0	4	1	0	0	0	24	0	0	0	0	0	0	0	37	0	0	0	0	0	0	0	0	59	19	0	0	0	0	0	0	0	0	0	0	24	0	0	0	0	0	0	0	0	0
06:00:00	57	48	2	61	0	61	0	24	0	0	24	4	40	0	0	0	0	0	69	0	0	0	0	1	0	0	0	38	7	0	0	0	0	0	0	0	0	0	0	0	0	0	0	0	0	0	0	0	0
06:30:00	44	35	0	61	0	27	0	98	0	0	6	1	42	0	0	0	0	22	5	3	0	0	0	46	0	16	0	22	0	0	28	0	0	0	0	0	0	0	0	0	0	0	0	51	0	0	16	0	0
07:00:00	34	0	5	61	3	40	6	81	5	6	13	5	20	0	52	8	55	85	0	64	2	7	2	25	2	49	6	2	25	5	0	0	0	0	0	0	0	0	0	0	0	14	0	57	3	0	58	0	0
07:30:00	61	18	42	57	72	86	66	66	57	80	69	76	41	56	34	87	58	77	52	49	83	70	74	31	44	36	61	49	35	70	42	0	0	5	0	10	10	0	0	3	25	72	0	46	0	25	40	0	0
08:00:00	65	52	44	73	41	35	47	108	44	53	38	31	41	32	43	42	23	65	40	65	55	52	74	22	27	14	29	31	51	56	2	0	0	52	18	33	79	0	0	62	67	38	0	63	0	93	8	0	0
08:30:00	66	55	53	61	59	53	64	96	31	55	62	68	49	24	43	53	54	86	44	45	70	52	26	68	35	23	32	32	16	38	69	64	59	53	65	48	52	30	50	69	68	36	55	65	36	80	39	65	24
09:00:00	65	39	56	63	54	71	65	115	61	71	59	55	61	37	51	68	51	92	23	52	74	41	39	31	13	25	37	22	30	19	68	44	60	59	71	38	45	42	48	33	60	57	66	74	39	59	50	72	40
09:30:00	62	51	61	40	48	55	63	84	58	95	56	46	49	26	52	57	44	99	13	41	58	33	60	45	15	28	49	23	22	38	45	19	89	47	31	22	56	21	40	42	54	51	54	67	21	90	38	59	17
10:00:00	62	55	52	55	51	69	55	107	63	87	56	21	42	11	32	48	50	87	37	13	81	18	24	38	29	17	51	6	13	15	30	29	44	27	55	26	23	10	30	34	22	51	38	51	18	59	52	62	10
10:30:00	58	54	68	31	49	65	62	73	72	69	55	46	55	14	60	79	63	94	43	25	72	26	40	52	25	27	40	18	24	17	13	31	25	30	43	20	21	29	35	48	36	55	39	39	13	58	29	42	11
11:00:00	48	47	62	18	69	44	61	92	60	78	38	44	35	20	50	54	36	74	14	18	67	9	41	53	15	20	10	26	30	1	34	3	30	33	17	23	28	10	30	10	18	26	30	55	9	47	30	24	0
11:30:00	39	23	42	20	59	27	57	71	64	46	40	25	31	16	34	18	33	69	4	23	76	21	37	31	9	12	25	22	27	21	16	25	29	27	32	13	10	24	36	13	35	47	27	44	14	38	31	10	4
12:00:00	41	40	42	31	52	27	47	75	56	61	34	41	35	24	16	19	12	54	32	5	62	12	29	30	6	20	30	14	25	1	20	0	17	38	39	29	31	19	24	24	17	48	24	51	4	31	31	0	7
12:30:00	35	24	54	18	7	28	39	22	43	52	20	18	28	16	9	8	14	49	3	16	15	5	10	13	6	2	20	4	26	1	17	15	3	32	31	7	27	14	27	14	42	34	36	55	2	38	8	0	0
13:00:00	32	20	71	0	9	18	36	57	37	41	34	26	17	14	27	40	16	44	0	18	49	9	35	21	11	2	23	18	13	32	43	0	98	39	22	0	16	0	23	50	31	33	16	45	0	46	21	0	0
13:30:00	27	23	37	42	9	28	47	37	39	35	9	15	9	34	9	8	22	27	1	6	27	3	24	25	6	6	46	1	19	0	30	0	0	38	52	0	25	1	30	14	27	31	36	31	8	29	9	0	0
14:00:00	29	5	64	39	3	26	29	27	31	36	11	35	19	28	6	4	14	33	41	13	47	24	30	3	3	25	12	13	4	0	33	0	0	51	32	0	0	2	22	22	48	39	11	17	7	25	8	2	0
14:30:00	26	23	32	0	2	11	34	20	27	24	4	106	17	56	19	15	19	11	0	0	42	16	9	29	2	4	3	12	8	0	9	0	0	0	26	0	25	34	0	13	13	36	9	20	0	5	14	0	0
15:00:00	31	20	43	39	0	15	26	51	19	0	8	37	15	8	4	38	21	32	23	0	12	3	28	7	4	15	21	0	14	0	32	0	0	16	20	0	3	13	0	38	39	13	30	29	0	4	12	44	0
15:30:00	39	6	56	0	0	20	20	17	37	0	9	26	25	35	3	6	23	13	5	0	28	4	12	17	0	5	24	0	11	0	0	0	38	12	7	0	0	0	0	5	28	16	0	6	0	56	11	11	0
16:00:00	6	14	28	33	12	10	29	19	32	0	22	19	17	2	28	5	19	6	25	0	18	7	27	34	0	19	35	0	13	0	0	0	0	9	23	0	0	7	0	19	0	23	0	38	0	2	20	15	0
16:30:00	39	8	34	28	33	56	22	52	38	47	14	34	46	43	4	2	36	15	1	0	31	17	25	5	23	1	20	26	8	0	0	0	0	35	13	0	0	17	0	27	52	22	42	39	0	1	3	0	0
17:00:00	15	24	26	0	0	18	45	38	29	22	18	27	68	0	0	17	48	13	0	0	29	0	6	16	6	18	77	7	10	25	23	47	40	42	33	19	30	24	29	32	54	23	21	35	17	41	22	42	19
17:30:00	36	33	51	36	0	24	15	65	33	41	11	25	15	32	27	39	23	8	38	36	6	0	23	19	7	10	31	28	17	0	35	69	45	56	30	39	19	27	27	44	39	53	27	42	14	45	32	56	10
18:00:00	33	28	63	54	37	24	10	74	34	33	18	19	22	16	7	9	35	35	37	10	66	25	9	27	6	17	23	10	16	26	20	31	38	33	16	28	2	12	23	73	28	24	20	37	7	40	6	30	6
18:30:00	48	56	34	46	45	36	21	70	51	40	26	29	30	27	15	35	50	27	40	20	34	15	46	35	18	21	35	28	29	1	19	23	45	41	48	26	19	17	5	48	40	34	32	67	12	19	18	37	0
19:00:00	41	30	48	50	29	29	31	72	28	27	34	12	13	17	7	20	80	55	57	41	50	9	23	24	18	26	19	36	24	29	26	33	34	40	18	25	13	18	29	25	12	27	16	43	13	35	29	26	4
19:30:00	50	39	46	37	61	57	50	77	59	51	53	32	54	17	15	21	77	69	53	50	43	22	38	34	40	21	34	13	16	19	31	34	30	34	25	31	22	14	35	35	33	50	39	31	16	39	27	43	4
20:00:00	63	56	80	56	78	53	55	92	66	75	51	54	40	34	32	27	106	106	93	62	83	37	80	48	57	34	52	36	44	54	14	38	35	37	29	27	30	23	19	30	37	51	40	56	18	27	31	32	11
20:30:00	47	88	94	75	100	86	73	145	100	100	77	93	87	74	57	75	129	125	94	99	107	83	85	61	87	32	74	64	81	106	60	94	79	70	71	49	71	38	71	69	85	77	65	78	54	88	73	114	25
21:00:00	38	41	78	5	49	47	44	122	97	111	40	42	34	57	23	73	73	107	82	77	77	53	95	59	64	30	59	59	39	63	44	16	62	62	62	55	59	38	74	58	67	61	50	61	28	98	84	82	12
21:30:00	28	2	55	0	2	3	12	70	11	37	6	7	0	2	17	8	37	79	26	19	22	47	45	10	4	2	13	17	37	16	27	0	41	36	32	43	47	26	35	33	60	52	31	55	18	78	41	74	12
22:00:00	0	0	72	0	0	7	0	30	0	0	0	0	0	0	22	0	22	50	0	0	0	1	7	19	0	0	0	0	6	0	7	0	9	36	4	21	12	9	15	15	54	98	4	0	5	0	23	7	14
22:30:00	64	0	45	0	0	0	0	1	0	28	0	0	0	0	0	0	51	61	7	0	0	23	14	4	0	0	0	0	18	0	1	0	8	13	0	3	1	0	0	1	3	2	0	0	0	0	4	0	2
23:00:00	5	0	35	16	0	23	9	3	0	2	0	0	0	0	14	0	69	52	1	0	0	12	4	35	0	0	0	0	12	0	0	0	24	15	0	0	0	0	0	6	0	0	0	0	0	0	0	0	0
23:30:00	0	0	41	5	0	4	0	17	0	31	1	2	5	0	8	0	4	40	0	0	26	18	7	6	0	0	0	0	2	0	0	0	3	0	0	0	0	0	0	0	0	0	0	0	0	0	0	0	0
00:00:00	10	0	78	65	0	0	0	32	0	3	0	0	0	0	20	0	0	34	3	0	38	10	30	0	0	0	0	0	3	0	0	0	0	10	0	0	0	0	0	0	0	0	0	22	0	0	0	0	0
00:30:00	31	4	58	19	72	0	0	0	0	23	12	0	50	1	37	0	0	35	1	0	0	0	43	0	0	0	0	0	32	0	0	0	0	0	0	0	0	0	0	0	0	0	0	57	0	0	9	0	0
01:00:00	44	0	62	0	5	0	0	17	3	0	50	0	22	5	14	0	53	4	1	0	21	0	22	0	0	6	0	0	0	0	0	0	17	0	11	0	0	0	0	0	0	0	0	16	5	0	0	0	0
01:30:00	15	0	37	0	0	0	0	83	66	0	19	0	4	55	0	0	55	0	0	0	18	0	7	0	28	5	0	0	8	0	0	0	39	0	34	0	0	0	0	0	0	26	0	0	0	0	0	0	0
02:00:00	9	0	46	0	0	0	0	75	0	0	0	0	15	8	0	0	0	0	6	0	1	0	7	0	0	0	0	0	6	0	0	0	7	0	0	3	0	0	0	0	67	22	0	0	0	0	0	0	0
02:30:00	56	2	19	0	0	3	0	59	0	9	0	0	9	0	0	0	14	16	0	0	0	35	11	0	0	0	56	0	8	0	0	0	14	0	0	0	0	0	0	0	64	0	0	0	0	0	0	0	0
03:00:00	54	0	52	0	0	29	0	3	74	60	28	0	52	0	0	16	31	12	0	0	0	1	6	0	0	0	21	0	0	0	0	0	79	0	0	0	0	0	0	0	4	45	6	0	0	0	0	0	0
03:30:00	50	0	35	28	0	0	0	35	23	35	39	1	26	40	2	0	54	0	0	0	0	8	4	0	0	0	0	0	11	0	0	0	21	0	0	0	0	0	0	0	47	0	0	47	0	0	0	0	0
04:00:00	0	0	32	53	0	0	0	46	1	0	39	0	0	43	16	0	40	0	0	0	6	26	18	0	0	0	0	2	8	0	0	0	0	0	0	0	0	0	0	0	9	0	0	41	0	0	0	0	0
04:30:00	0	0	62	11	0	0	25	30	57	0	9	0	0	16	28	0	0	0	0	0	42	13	0	38	0	0	0	46	2	0	0	0	0	0	0	0	0	0	0	41	0	7	0	36	0	0	0	0	0
05:00:00	0	4	57	0	0	0	48	49	47	0	0	0	0	0	12	0	20	0	0	0	31	0	0	21	0	6	0	26	23	0	0	0	0	32	54	0	0	0	0	10	0	0	0	31	0	0	0	0	0
05:30:00	5	0	38	0	0	0	8	40	33	0	0	0	33	0	0	0	49	0	0	0	27	0	0	0	14	0	0	0	4	0	0	0	0	127	4	14	0	0	1	0	0	0	0	37	0	0	0	0	0
06:00:00	48	0	95	0	0	2	17	35	42	25	5	0	37	0	0	11	24	58	0	26	24	0	38	25	7	0	0	28	0	0	0	0	66	0	0	69	69	0	0	0	0	0	0	27	0	0	0	0	0
06:30:00	37	46	0	0	0	39	12	74	7	63	73	0	0	0	21	0	17	64	45	4	15	55	38	43	0	13	0	3	0	0	2	37	67	14	0	25	65	0	0	0	58	26	0	43	0	0	25	0	0
07:00:00	19	33	0	37	0	13	0	69	0	4	53	0	0	0	19	8	30	56	34	0	0	44	34	34	0	21	42	0	7	0	40	11	42	31	33	30	50	43	51	47	63	44	62	43	33	71	67	58	15
07:30:00	40	30	0	46	70	34	17	96	0	0	30	0	8	0	4	44	46	55	0	0	36	41	0	36	33	12	41	0	37	0	26	12	10	12	6	23	43	17	56	39	25	27	22	27	17	59	6	10	0
08:00:00	51	18	38	38	35	15	87	77	15	36	3	0	45	41	14	44	41	85	32	17	62	42	0	29	10	0	29	41	13	0	27	23	0	13	20	24	35	17	33	32	30	36	30	38	11	41	35	0	15
08:30:00	58	55	91	69	44	34	64	105	57	65	55	91	71	52	31	58	74	92	83	52	40	37	58	37	41	30	64	26	33	57	40	45	45	38	59	38	39	34	45	39	63	46	57	34	30	43	47	49	17
09:00:00	58	65	73	58	49	64	58	94	59	74	51	74	80	52	29	37	90	86	71	53	45	44	58	62	44	22	50	54	28	51	23	39	41	52	43	43	29	20	44	65	45	56	53	69	28	34	51	62	21
09:30:00	44	43	55	31	46	37	55	100	73	57	48	57	25	39	23	45	89	75	55	52	43	24	63	55	19	17	32	25	22	19	32	37	39	34	46	33	35	17	36	40	29	45	55	40	26	27	47	51	14
10:00:00	40	26	82	10	44	43	46	97	41	63	29	42	51	31	18	48	70	72	40	30	79	30	58	60	16	26	26	14	25	22	16	44	52	59	49	29	27	10	26	61	37	53	57	53	21	37	38	46	6
10:30:00	43	32	71	35	52	36	44	91	46	67	20	35	35	29	43	40	57	94	60	60	56	24	57	50	19	28	38	10	31	18	17	24	32	48	50	28	25	20	40	45	62	42	34	45	26	50	50	28	12
11:00:00	38	33	66	33	23	2	40	100	31	72	1	31	27	30	17	42	56	54	23	21	119	29	24	46	11	18	31	10	13	7	30	47	29	46	37	24	30	12	39	39	62	30	27	33	15	38	32	48	8
11:30:00	31	21	67	6	20	9	34	94	33	50	16	26	5	21	26	33	45	98	29	29	37	27	32	54	21	35	18	12	18	10	19	27	23	37	45	22	16	12	18	59	61	43	38	42	24	41	27	45	14
12:00:00	26	29	72	26	24	4	34	91	35	58	2	46	32	25	13	37	38	68	17	7	42	12	30	44	15	9	23	6	15	14	10	11	21	24	58	31	14	7	19	39	26	35	22	46	17	35	6	35	10
12:30:00	33	25	57	28	20	0	26	71	27	67	29	34	16	13	15	17	40	68	16	6	29	8	12	37	4	26	19	13	17	8	32	21	36	20	43	26	42	37	21	15	34	43	12	47	12	44	38	38	8
13:00:00	44	31	40	1	12	18	33	73	14	26	5	76	0	38	4	14	15	58	53	5	17	8	22	49	11	23	18	2	19	9	9	11	22	23	37	20	17	9	30	32	40	35	32	31	8	48	6	14	7
13:30:00	44	24	46	1	6	2	50	42	27	41	7	39	0	11	15	42	14	63	13	2	30	12	30	53	8	19	13	2	10	0	29	6	62	26	22	10	4	14	14	39	40	18	24	35	0	21	8	8	5
14:00:00	24	18	52	60	5	22	25	24	16	46	0	5	0	10	6	10	19	48	34	0	0	0	17	20	10	5	71	6	44	0	12	15	26	27	36	19	12	25	30	19	37	14	20	38	17	43	41	21	12
14:30:00	24	17	30	27	17	0	35	40	19	12	0	33	13	5	14	0	17	48	43	0	22	20	10	41	3	36	12	0	19	0	22	44	27	44	18	16	8	41	154	61	22	40	22	45	8	47	17	34	6
15:00:00	26	25	82	11	0	0	15	17	16	35	0	22	41	30	12	11	57	34	0	0	10	0	8	9	11	10	17	25	10	0	17	25	29	32	29	6	9	13	18	29	13	24	10	20	7	36	0	22	10
15:30:00	26	17	69	32	14	7	15	42	33	32	15	22	14	4	28	18	22	0	9	0	34	26	32	36	5	12	11	18	22	0	6	0	16	15	63	0	0	19	0	22	15	25	0	29	7	15	23	1	0
16:00:00	24	17	56	4	6	54	34	43	25	53	1	45	17	23	13	10	24	0	46	0	27	8	24	26	7	17	32	0	7	12	27	2	62	15	32	0	8	7	0	28	31	8	30	51	0	29	8	0	0
16:30:00	26	27	67	41	34	18	29	37	0	30	17	83	16	19	4	12	38	0	3	39	27	22	11	21	16	21	59	0	8	0	27	22	11	26	20	26	8	22	0	27	23	14	6	27	10	25	25	0	11
17:00:00	15	22	62	19	23	8	10	64	31	38	16	31	17	14	0	9	17	0	53	0	19	12	19	24	24	7	14	20	6	0	14	11	30	18	23	9	11	9	0	20	27	2	15	35	0	15	9	17	2
17:30:00	46	32	70	54	7	16	16	39	39	25	35	22	10	32	22	14	39	0	52	15	20	13	25	26	16	20	9	3	12	1	16	34	26	20	9	19	11	12	0	16	20	16	2	19	8	16	35	21	0
18:00:00	38	21	51	27	8	8	29	64	24	24	25	34	51	25	8	12	32	3	48	15	45	12	4	24	9	34	10	8	22	21	18	11	12	15	25	19	8	23	34	27	32	15	17	31	2	15	26	37	0
18:30:00	38	28	63	23	14	27	10	75	42	24	32	37	34	35	14	24	25	61	53	32	37	10	21	29	22	29	25	11	8	9	24	14	22	16	30	18	12	96	14	36	21	10	16	38	3	17	29	15	5
19:00:00	43	19	76	23	69	32	20	80	27	34	16	38	34	27	10	23	30	60	50	42	40	6	19	29	20	24	26	8	21	28	16	25	21	24	29	17	23	29	23	34	13	31	31	34	27	23	40	7	25
19:30:00	43	29	72	41	38	36	17	99	28	46	39	43	34	16	23	22	53	74	65	36	40	24	22	42	27	43	17	21	19	33	22	26	25	9	28	32	26	37	25	15	55	53	24	32	24	27	20	39	8
20:00:00	43	33	91	43	58	44	26	101	34	64	37	57	23	35	27	25	76	62	91	37	70	32	29	53	43	41	25	12	37	37	29	41	53	21	43	37	36	40	43	55	63	77	64	57	33	38	43	38	16
20:30:00	39	69	114	60	81	41	57	140	76	109	51	79	57	69	53	47	131	86	96	91	73	69	80	62	72	28	46	55	67	55	51	76	82	46	78	53	79	61	93	59	134	70	71	87	57	77	80	87	31
21:00:00	31	45	94	48	59	54	49	128	56	80	40	54	55	61	43	36	108	63	96	94	61	61	77	57	72	34	32	36	47	24	34	65	60	42	55	48	60	52	18	56	106	55	49	73	42	77	96	78	24
21:30:00	5	3	53	14	0	37	25	137	15	48	30	46	24	19	0	24	39	82	46	25	83	25	15	44	10	30	1	0	28	38	25	39	34	22	26	50	61	46	2	87	66	38	41	55	63	66	73	66	26
22:00:00	0	0	40	0	0	22	0	109	0	61	7	28	36	0	52	0	5	61	26	0	13	0	0	24	0	14	0	0	9	7	12	3	1	12	12	29	33	55	0	52	46	18	6	18	24	13	36	27	15
22:30:00	0	0	28	0	0	0	0	70	0	41	24	13	24	58	0	0	54	67	16	14	49	12	0	18	0	0	0	0	10	0	9	0	0	15	12	20	24	32	37	14	37	5	16	26	26	57	25	15	0
23:00:00	0	0	37	0	12	22	0	42	35	26	19	28	29	0	17	0	7	39	0	2	12	6	0	14	0	18	0	0	11	0	5	0	0	0	3	20	0	27	0	14	26	9	0	0	4	12	0	4	0
23:30:00	0	0	27	6	17	32	0	14	6	37	22	3	0	0	28	0	58	3	0	9	0	15	0	21	0	23	0	0	2	0	6	0	0	0	2	16	0	2	0	16	40	0	1	0	7	0	0	0	0
00:00:00	0	0	23	0	0	34	0	20	0	11	0	27	24	19	3	0	0	1	0	0	44	5	0	31	0	2	0	0	10	0	11	0	0	0	13	0	4	0	0	8	6	0	12	0	16	0	0	0	0
00:30:00	37	0	32	0	2	9	0	27	38	20	35	0	8	16	18	54	45	58	0	0	26	6	0	21	9	0	0	0	21	0	9	0	0	0	7	0	0	0	0	32	26	9	0	0	0	0	0	0	0
01:00:00	60	0	19	0	0	0	0	13	7	3	19	0	5	2	8	0	16	3	22	0	0	0	0	4	0	0	0	0	0	0	11	0	0	0	44	0	0	9	0	10	17	6	0	0	16	0	0	0	0
01:30:00	47	0	43	2	20	14	0	92	0	27	0	0	31	0	2	0	0	0	14	0	0	0	14	3	10	32	0	0	0	0	25	0	0	0	32	22	0	15	0	15	14	21	0	0	14	0	0	0	0
02:00:00	26	0	34	0	0	8	0	65	60	0	7	0	29	1	11	0	32	6	54	3	4	0	0	7	0	45	7	0	0	0	0	0	0	0	71	20	0	46	0	15	14	2	0	0	4	0	0	0	0
02:30:00	11	0	61	0	0	15	48	44	46	0	0	0	21	0	0	0	31	44	0	3	0	2	0	21	5	56	44	0	17	0	0	0	0	0	0	13	0	1	0	10	19	0	0	0	11	9	0	0	0
03:00:00	50	0	48	0	0	10	0	56	48	0	1	0	22	19	0	0	9	25	0	22	0	0	0	14	0	66	36	0	54	0	0	0	0	0	8	17	0	48	0	0	13	32	0	0	7	2	0	0	0
03:30:00	22	0	62	60	0	6	0	15	25	0	26	66	14	2	0	0	0	13	0	0	0	11	0	5	0	2	26	0	39	0	0	0	0	0	18	33	2	18	0	0	13	0	0	0	12	28	0	0	0
04:00:00	0	0	53	13	0	39	19	41	2	0	4	7	5	18	12	0	4	19	0	8	0	47	0	0	2	1	0	0	27	0	0	0	0	0	0	2	0	31	0	11	9	0	0	0	0	14	0	0	0
04:30:00	27	13	40	0	0	18	0	22	0	28	15	0	0	11	34	0	2	1	0	0	0	24	0	2	0	2	0	0	2	0	13	0	0	0	0	0	0	0	0	0	8	5	0	14	14	37	0	0	0
05:00:00	38	41	4	0	0	0	0	23	0	34	32	0	13	5	3	0	25	28	0	0	37	46	0	6	0	6	0	0	40	0	3	0	27	0	0	2	0	0	0	10	48	47	52	75	5	12	0	0	0
05:30:00	23	16	18	35	0	1	27	73	13	38	1	13	12	11	27	0	20	53	0	29	9	35	23	0	11	2	0	0	8	0	4	12	40	2	0	6	56	0	0	0	38	17	27	59	24	0	0	36	0
06:00:00	10	14	29	10	0	5	54	62	44	97	0	39	0	6	11	8	4	33	36	2	0	0	31	15	25	31	1	51	9	0	2	0	46	28	0	26	55	0	0	0	22	16	0	0	14	0	0	171	0
06:30:00	30	3	6	0	0	0	39	65	34	0	0	0	0	7	0	0	38	4	34	11	0	22	41	8	0	27	61	48	26	0	38	0	49	19	13	13	40	33	0	0	21	0	6	1	0	0	11	20	0
07:00:00	31	32	39	36	30	33	32	83	39	47	38	21	42	59	18	26	49	44	41	56	33	31	38	12	31	28	35	40	21	27	19	11	0	30	46	18	50	28	78	5	22	23	0	57	0	0	70	0	2
07:30:00	28	9	41	42	15	8	30	83	37	2	6	0	11	42	12	22	34	49	28	2	39	34	31	15	4	3	29	56	26	6	21	29	45	24	23	29	39	37	52	43	46	37	33	46	12	70	47	27	35
08:00:00	29	0	32	13	0	0	30	112	35	13	0	0	0	35	9	33	24	54	41	4	36	25	31	19	19	12	6	25	17	32	11	29	36	28	17	28	30	25	43	31	41	20	55	36	25	53	40	35	15
[truncated: 271 more columns]

## Sheet: Fig 6 S3 B (HFD AMPK-DN)
FED(AMPK-DN~BD-AD-AKHR)	M27-3.18															M23-3.18																M24-3.18																M22-3.17
20:30:00	78	70	53	68	35	58	47	41	27	37	10	52	32	42	43	57	42	50	78	38	33	67	51	41	64	42	64	66	49	37	28	58	87	61	59	46	54	43	66	59	71	58	61	76	72	48	47	34	31
21:00:00	43	94	53	64	44	42	52	24	15	40	21	56	38	58	44	50	46	42	53	40	45	59	47	48	66	51	66	64	63	27	21	68	37	50	66	38	48	34	64	55	93	63	56	91	44	44	40	13	10
21:30:00	87	71	40	61	51	49	50	34	31	21	11	43	44	77	51	35	47	38	40	26	40	63	55	65	65	49	76	53	53	23	12	57	61	49	51	52	47	47	72	48	65	36	67	65	52	50	36	0	0
22:00:00	43	36	49	53	50	48	44	10	28	0	30	17	50	49	47	47	73	6	41	24	30	63	46	47	72	66	76	30	64	58	3	65	38	41	38	39	59	44	61	15	16	42	61	58	42	36	80	0	0
22:30:00	16	42	34	2	48	32	16	0	17	0	23	0	53	48	41	11	28	0	46	17	33	68	38	26	89	46	52	44	52	48	0	57	0	59	67	4	57	48	83	0	0	34	82	47	0	38	24	0	0
23:00:00	0	21	0	0	58	24	0	0	0	0	11	0	42	35	27	14	15	0	43	0	0	27	5	53	73	10	13	34	44	68	0	22	0	26	0	0	53	56	16	0	0	33	54	29	2	25	45	0	0
23:30:00	0	0	0	0	21	35	0	0	0	0	11	0	56	0	44	0	0	0	49	0	0	1	0	7	53	23	5	30	42	17	0	0	0	36	0	0	41	38	21	0	0	20	0	61	0	43	44	0	0
00:00:00	0	0	0	0	0	2	0	15	0	0	0	0	31	0	36	0	0	0	36	0	0	0	0	0	55	0	0	38	5	16	0	40	0	36	0	0	24	31	0	0	0	9	2	39	0	23	42	0	7
00:30:00	0	0	0	0	0	0	0	44	0	0	0	0	24	0	5	1	0	0	0	0	0	0	0	0	27	0	0	34	15	25	0	17	10	18	0	0	24	55	0	0	5	10	0	37	0	0	14	0	0
01:00:00	0	0	0	0	0	0	0	0	0	0	0	0	0	0	9	0	0	44	0	0	0	0	0	0	29	0	0	9	0	9	0	0	5	16	0	0	0	24	0	0	22	63	0	46	0	0	14	0	4
01:30:00	0	45	0	0	0	0	0	0	0	0	0	0	0	0	25	0	45	0	0	0	0	0	0	0	52	0	0	0	0	0	0	0	0	8	0	0	0	0	0	0	0	29	0	55	0	1	0	0	0
02:00:00	0	23	0	0	0	0	0	0	0	0	0	5	0	0	0	19	5	0	0	33	0	0	0	6	44	0	0	0	36	0	0	0	0	0	0	0	0	0	0	0	0	25	0	46	0	0	0	0	0
02:30:00	0	8	0	0	0	28	0	0	0	0	5	68	0	36	0	48	0	0	0	33	0	0	0	0	47	24	2	0	7	4	0	0	0	0	23	0	0	0	4	0	35	15	0	15	0	0	0	0	0
03:00:00	0	1	0	60	0	36	16	0	0	0	21	10	0	66	4	36	0	0	0	16	0	0	33	0	44	0	0	0	26	35	0	0	24	0	87	0	0	0	90	0	74	0	0	4	0	0	0	0	0
03:30:00	0	2	0	49	0	19	33	64	0	0	8	5	0	48	0	31	0	0	0	0	0	34	0	0	17	0	0	31	24	22	0	0	103	0	65	0	0	0	12	0	43	0	0	0	0	0	0	0	0
04:00:00	0	0	0	57	0	0	41	42	0	0	3	2	0	0	0	20	0	0	0	0	0	44	0	0	0	0	0	51	13	6	0	0	85	0	55	0	6	0	0	0	4	30	0	0	0	0	0	0	0
04:30:00	0	0	0	5	0	0	23	0	0	0	0	1	0	0	55	0	0	8	0	0	0	29	0	0	0	43	0	53	0	43	0	0	80	0	39	0	0	0	0	0	0	35	0	0	0	0	10	0	2
05:00:00	0	0	0	0	57	0	0	0	0	0	0	0	36	0	25	0	0	48	0	0	0	1	0	0	0	39	0	40	0	8	0	0	0	0	0	0	0	0	0	0	0	50	0	1	0	0	43	0	1
05:30:00	0	0	0	0	60	0	0	0	0	0	0	0	33	0	50	0	15	32	0	18	0	0	0	0	0	0	5	47	0	0	0	0	0	0	0	0	0	0	43	33	0	30	0	0	0	0	19	0	14
06:00:00	0	0	0	0	29	2	0	0	0	0	0	0	26	0	7	0	45	0	0	12	0	0	0	0	40	0	85	0	60	0	0	51	0	0	0	0	69	46	22	58	0	13	0	0	0	0	22	0	8
06:30:00	0	10	0	0	3	30	15	0	0	0	0	0	0	0	3	0	13	0	0	7	0	0	0	5	56	31	55	0	10	30	0	24	0	0	0	0	47	36	0	24	7	3	71	0	2	0	3	0	0
07:00:00	0	11	24	0	0	0	0	0	0	0	0	0	0	0	0	39	0	0	0	0	37	0	51	44	48	30	20	32	50	25	0	0	0	0	0	0	42	28	0	8	0	0	39	50	0	0	0	0	6
07:30:00	0	0	33	30	28	24	26	0	0	0	14	32	0	38	42	43	32	20	58	0	48	25	37	35	52	8	0	6	37	36	14	20	55	0	37	68	41	19	49	0	16	0	40	40	47	7	0	0	16
08:00:00	0	0	30	35	44	30	25	47	0	5	13	59	0	51	28	52	95	33	88	61	60	31	21	64	52	30	0	0	42	37	0	30	87	0	57	0	44	2	49	0	45	6	41	34	76	51	11	13	0
08:30:00	68	7	36	56	35	28	26	54	25	51	23	57	40	67	50	56	56	58	65	46	60	57	45	43	67	62	75	38	42	48	24	58	60	88	78	63	62	48	105	72	59	44	51	31	79	47	54	34	4
09:00:00	68	6	47	60	55	34	34	66	48	50	22	73	59	75	37	42	62	36	72	64	49	46	40	26	81	75	80	67	50	40	26	72	27	71	82	72	72	70	114	73	55	31	84	38	96	40	80	22	0
09:30:00	40	14	38	49	35	25	30	40	38	22	10	47	50	55	17	33	36	29	69	45	39	54	39	30	72	51	75	44	49	26	16	38	44	57	77	53	57	35	82	94	41	27	74	36	68	52	54	20	3
10:00:00	26	2	21	45	40	24	11	44	36	27	11	22	22	65	28	19	40	25	47	45	39	19	27	22	42	70	74	24	51	24	15	52	24	40	56	19	48	39	83	77	39	14	49	27	61	42	62	24	26
10:30:00	36	17	33	31	44	33	39	38	38	27	9	29	24	59	0	34	60	26	43	33	31	30	34	23	60	53	62	21	77	46	6	74	45	52	55	35	59	35	77	82	38	18	60	37	79	32	38	34	0
11:00:00	41	2	33	13	22	22	24	32	19	21	14	29	31	98	15	44	31	34	50	49	29	35	50	17	52	83	63	37	34	24	0	24	40	57	94	21	49	26	69	69	28	6	54	23	54	35	24	22	2
11:30:00	23	16	29	0	37	30	1	34	18	24	9	36	21	62	0	22	19	15	50	49	23	19	35	27	53	45	58	21	42	18	15	27	21	64	37	32	18	20	69	72	18	10	51	14	41	30	24	17	7
12:00:00	22	9	30	0	5	20	19	45	17	13	16	41	20	27	0	37	18	53	57	54	14	78	24	16	37	49	54	20	30	8	0	29	42	54	41	33	5	10	54	55	5	10	52	25	48	30	20	13	11
12:30:00	19	1	22	21	34	23	18	28	17	9	14	21	35	39	6	15	16	19	40	50	16	31	42	17	57	37	50	5	19	13	1	30	27	29	39	10	0	9	44	41	2	17	31	31	47	33	14	9	15
13:00:00	23	3	19	37	14	13	2	18	7	13	2	26	12	48	0	33	36	14	39	32	24	14	49	3	34	35	40	25	28	22	1	18	24	40	25	7	0	35	44	57	10	13	19	19	23	23	19	7	2
13:30:00	17	5	18	27	3	25	11	34	11	0	5	34	11	65	28	9	7	10	41	26	13	14	32	14	29	28	26	5	8	25	0	7	0	48	55	18	0	0	29	39	5	11	29	23	33	28	13	2	0
14:00:00	26	4	24	27	0	23	0	30	0	10	9	31	17	37	0	5	4	1	27	36	23	39	28	19	27	7	19	0	27	13	9	19	17	36	36	8	0	11	14	30	0	13	30	41	18	25	14	0	13
14:30:00	0	4	5	21	26	12	0	14	28	3	0	13	10	51	0	26	0	4	40	25	26	17	34	28	26	13	17	12	6	15	0	12	38	19	10	4	0	5	50	38	6	12	27	22	27	32	18	0	6
15:00:00	28	0	2	0	0	2	0	30	0	0	0	15	25	46	0	6	0	0	6	30	13	21	23	3	25	24	31	14	23	23	17	20	7	17	0	6	0	22	37	25	0	5	8	21	18	28	6	0	13
15:30:00	10	0	15	0	13	10	0	4	0	0	15	19	4	45	0	21	9	15	0	40	16	35	0	18	9	32	21	0	19	29	0	0	0	12	19	0	0	12	18	25	0	14	37	28	20	42	23	0	0
16:00:00	9	25	8	19	8	16	10	2	2	0	9	6	10	48	0	27	32	11	28	28	6	8	12	14	18	21	3	0	13	17	0	14	24	7	7	14	0	0	18	49	0	11	9	16	16	36	2	0	0
16:30:00	16	0	0	22	23	46	23	30	0	16	16	33	14	34	0	22	6	0	5	26	15	19	10	15	22	24	24	0	6	2	4	2	7	35	2	13	0	0	3	20	0	5	37	16	30	13	14	0	10
17:00:00	3	2	3	0	4	15	11	0	0	0	3	31	11	36	20	21	13	14	35	33	0	0	5	16	22	12	19	0	27	15	0	0	5	28	0	2	0	27	0	42	20	15	14	15	6	24	38	0	0
17:30:00	2	0	21	22	26	20	2	18	12	12	10	25	14	57	0	15	12	11	38	27	22	24	25	25	11	42	15	0	8	10	6	23	21	6	0	17	0	15	29	42	13	6	3	10	46	23	17	0	2
18:00:00	0	10	2	14	35	13	0	24	17	0	10	40	16	50	0	22	12	10	28	38	1	17	36	17	15	42	3	14	21	21	11	15	5	30	25	0	0	43	29	32	7	16	26	10	39	27	18	0	19
18:30:00	25	5	8	38	23	14	15	18	21	0	6	32	18	46	3	47	28	21	44	47	11	29	27	25	15	39	6	50	26	16	10	8	1	26	23	30	5	38	26	31	19	16	27	23	38	36	26	26	9
19:00:00	0	8	0	34	33	23	22	15	27	28	14	42	23	49	9	22	31	14	49	36	22	16	12	16	31	45	13	19	21	27	2	24	14	23	7	28	51	22	37	33	32	11	35	26	35	36	30	18	2
19:30:00	24	12	20	27	62	25	23	26	30	19	23	73	37	63	17	39	34	29	61	45	56	31	37	29	82	75	29	14	34	34	6	34	16	39	14	30	36	26	42	36	24	15	56	32	38	35	30	28	14
20:00:00	54	14	21	36	58	43	31	41	43	41	30	76	36	65	39	37	43	34	67	70	37	22	46	65	100	74	53	22	70	11	16	28	31	42	30	41	63	54	51	64	46	20	81	39	71	40	55	30	16
20:30:00	73	28	26	61	70	77	49	75	62	42	26	108	93	89	52	62	67	46	84	92	40	50	70	51	100	53	105	44	78	35	25	50	44	51	44	50	57	40	72	81	62	40	92	65	62	92	61	43	36
21:00:00	68	27	28	39	57	86	69	67	45	71	33	101	88	96	77	56	115	53	96	85	31	65	79	46	83	54	105	86	61	16	22	44	80	50	66	57	70	33	56	106	47	33	116	59	62	94	47	27	0
21:30:00	4	22	0	8	15	67	20	21	32	3	10	18	18	47	53	35	36	13	25	27	13	15	117	27	77	14	24	57	2	8	1	26	109	25	36	14	106	0	22	6	15	50	35	62	5	61	27	8	0
22:00:00	0	0	0	2	0	52	0	0	0	1	0	6	0	0	20	0	0	0	0	0	0	4	0	4	13	0	0	40	0	0	0	0	0	3	3	0	17	0	14	2	9	13	9	4	0	7	7	0	0
22:30:00	0	0	0	0	0	33	0	0	0	0	0	0	10	0	0	0	0	0	0	0	0	0	0	0	0	0	0	0	0	0	0	0	0	0	6	0	0	9	13	0	0	2	19	35	43	19	3	0	0
23:00:00	0	0	0	0	0	13	5	0	0	1	0	0	8	0	0	0	0	0	0	0	0	0	0	5	0	30	0	0	0	0	0	19	8	0	2	0	0	0	10	0	5	18	5	0	2	30	31	0	19
23:30:00	0	0	0	0	0	0	1	0	0	2	0	0	17	0	0	0	1	0	0	0	0	0	0	0	0	34	0	0	0	0	0	7	6	27	37	0	4	4	26	0	7	9	29	0	0	23	34	0	40
00:00:00	0	0	0	0	0	42	10	0	0	1	0	0	37	0	0	3	0	0	0	0	0	0	0	0	0	6	0	0	3	0	0	14	16	19	0	0	0	15	2	0	4	0	12	0	8	11	0	0	0
00:30:00	0	0	0	0	0	61	0	0	0	0	0	0	0	0	36	2	3	0	0	0	0	0	0	0	0	0	0	0	0	0	0	0	0	49	0	0	0	14	7	0	2	0	0	0	0	60	14	0	0
01:00:00	0	28	0	0	0	33	0	0	0	1	0	0	0	0	18	2	0	0	0	0	0	0	0	0	0	0	15	0	0	0	0	0	0	60	7	0	0	0	0	0	12	0	0	0	0	48	2	31	0
01:30:00	0	9	4	0	0	0	4	0	0	0	0	0	0	84	0	8	0	0	0	0	0	0	0	19	0	0	0	38	0	0	0	0	0	25	0	0	1	0	29	0	0	14	0	0	0	23	0	20	26
02:00:00	0	0	0	0	0	0	29	0	0	10	0	0	0	43	41	9	0	0	0	0	0	0	0	6	0	21	0	23	0	0	0	12	0	10	0	0	5	0	42	0	8	34	0	0	0	17	0	0	5
02:30:00	0	0	0	0	0	0	60	9	0	0	0	0	4	0	43	1	0	0	0	0	0	0	0	8	71	20	0	3	0	5	0	51	0	5	0	0	0	0	0	0	4	35	10	0	0	0	0	0	0
03:00:00	0	0	0	0	0	0	0	81	0	0	0	1	59	0	0	86	0	0	0	0	0	0	30	3	50	7	0	73	0	0	0	0	0	0	0	0	0	0	0	19	0	29	0	0	0	0	25	0	0
03:30:00	0	0	0	0	0	0	0	24	0	0	0	0	38	28	0	41	0	0	0	0	0	0	32	38	3	0	0	53	0	0	0	0	45	31	60	0	36	0	0	10	0	22	0	22	0	0	34	0	18
04:00:00	0	0	0	0	0	0	0	0	0	0	28	0	17	0	5	40	0	0	0	0	0	0	0	32	29	0	0	50	0	4	0	0	46	0	63	0	29	5	0	13	6	10	4	56	0	0	17	0	2
04:30:00	0	0	39	0	0	0	0	0	0	0	46	0	0	0	43	115	32	0	0	0	0	0	0	22	3	0	0	32	0	19	0	0	29	6	44	0	7	54	2	0	0	6	0	38	0	8	0	0	0
05:00:00	0	2	20	0	0	58	0	0	0	11	25	0	0	0	6	8	0	0	0	0	0	0	0	0	0	0	0	22	36	0	0	0	23	4	0	0	0	27	0	0	3	4	0	42	0	0	19	0	0
05:30:00	0	0	19	0	0	24	0	0	0	44	15	0	0	0	0	29	0	0	0	3	0	0	0	0	0	18	24	32	0	21	0	0	0	4	0	26	0	2	0	0	10	0	36	37	2	0	8	0	0
06:00:00	32	0	6	0	0	0	13	5	0	24	0	0	0	0	0	41	46	41	2	56	0	0	0	0	48	0	65	49	0	0	0	28	0	0	0	21	0	0	0	20	0	0	37	43	0	0	0	0	12
06:30:00	47	37	0	39	30	0	76	46	0	0	0	58	0	0	0	2	15	28	0	4	0	0	0	0	48	0	50	18	49	8	0	5	0	0	0	0	31	0	0	32	67	23	23	28	3	2	0	0	0
07:00:00	25	26	31	44	64	47	31	36	47	31	20	60	38	68	40	36	46	27	70	50	41	77	55	24	54	59	59	40	42	30	39	26	49	32	60	17	55	23	62	66	42	34	34	21	78	41	18	21	0
07:30:00	13	23	14	28	36	28	25	0	39	0	0	5	24	63	27	35	17	4	67	44	43	47	49	0	42	30	45	17	35	6	17	10	32	21	33	0	43	23	35	14	10	6	36	27	39	32	4	0	0
08:00:00	41	8	16	4	48	38	26	30	27	1	0	59	10	32	6	42	14	26	63	30	27	31	41	14	42	32	36	33	33	30	19	34	36	23	41	28	48	21	34	0	0	13	41	30	36	35	16	0	0
08:30:00	66	16	28	61	44	67	39	47	49	51	40	58	58	69	38	60	50	46	72	61	39	45	55	34	84	46	71	30	30	16	47	39	30	32	58	49	68	36	66	73	69	50	51	41	65	37	55	40	10
09:00:00	62	26	47	58	53	62	35	63	64	37	33	74	59	77	32	47	62	70	76	78	45	35	47	32	92	55	88	48	48	10	16	60	35	41	76	45	78	30	78	76	68	41	79	59	71	55	76	37	16
09:30:00	47	30	33	44	68	58	33	46	60	18	23	74	47	55	36	39	52	30	66	74	46	29	47	21	86	44	83	28	69	21	20	41	32	63	53	46	60	35	62	72	69	26	75	47	52	32	61	32	34
10:00:00	56	29	37	34	66	62	44	49	40	20	30	77	45	69	12	54	65	58	47	93	41	21	37	29	108	44	75	17	42	3	22	31	49	51	67	35	70	38	62	59	49	23	78	55	52	47	56	24	29
10:30:00	41	23	41	39	51	56	52	53	37	11	21	60	47	63	18	57	49	37	61	64	31	35	42	24	79	58	61	10	28	3	23	35	27	46	67	25	59	22	43	60	44	22	62	46	50	41	46	20	0
11:00:00	35	9	24	21	56	43	5	57	26	14	14	61	44	47	13	49	28	32	34	49	30	21	50	16	70	33	60	40	38	2	8	27	36	31	38	11	44	23	35	55	17	16	54	34	71	34	28	18	0
11:30:00	30	4	13	16	63	46	30	34	24	26	22	45	35	57	18	47	36	15	39	51	12	24	48	30	64	15	50	16	18	0	6	23	23	50	55	13	30	10	13	44	9	23	37	26	43	31	23	18	22
12:00:00	0	16	14	12	27	35	23	29	19	16	17	41	19	56	21	39	37	19	38	63	8	17	43	19	55	20	41	13	13	1	4	16	21	35	52	9	21	12	14	55	28	22	20	32	35	40	18	16	26
12:30:00	22	15	11	8	20	40	19	33	11	5	9	33	21	46	21	25	23	20	27	35	10	13	47	11	50	14	40	10	25	4	8	10	14	14	35	19	10	16	3	52	12	19	24	22	38	48	18	16	1
13:00:00	16	14	16	1	25	30	11	31	0	15	9	23	28	35	11	33	10	14	34	37	3	13	34	6	49	10	45	4	9	18	10	22	25	28	52	2	6	19	31	53	0	13	52	30	34	35	30	18	0
13:30:00	19	28	5	18	2	20	8	2	12	7	10	29	25	54	2	43	17	7	33	37	4	20	46	10	34	0	46	16	36	4	14	15	19	28	57	0	23	6	0	33	33	17	23	28	50	32	12	14	0
14:00:00	3	4	28	0	10	25	4	47	13	15	10	12	35	59	29	43	17	42	0	41	17	26	34	2	48	13	38	13	24	47	12	10	27	42	77	21	24	32	0	7	2	21	2	22	53	37	35	18	0
14:30:00	0	6	10	0	11	22	0	12	0	59	9	10	8	41	10	28	9	13	30	21	16	26	47	18	22	2	13	2	23	15	12	0	20	6	33	0	0	23	31	39	2	18	4	27	31	23	19	16	11
15:00:00	0	0	2	0	0	16	0	0	0	1	6	22	7	33	0	33	4	0	13	42	0	17	15	11	28	0	32	0	8	14	5	0	13	14	28	43	0	0	39	48	1	13	0	35	28	28	20	4	9
15:30:00	0	4	0	25	0	3	0	0	0	0	0	23	9	26	0	8	0	0	0	11	0	6	10	38	22	25	2	0	9	9	2	0	4	0	20	12	0	14	37	1	1	16	22	26	18	21	11	15	3
16:00:00	43	5	0	8	0	17	16	0	0	33	18	20	18	26	0	16	24	0	0	26	0	15	20	13	22	4	22	0	10	1	6	21	19	14	23	0	0	6	3	38	6	17	25	19	20	35	20	0	14
16:30:00	23	3	17	21	19	16	31	52	39	0	7	19	10	56	22	8	11	4	4	16	35	8	13	17	17	4	10	31	12	0	2	2	11	12	42	25	2	18	18	64	0	13	21	14	37	23	11	8	18
17:00:00	1	0	1	11	0	10	0	7	17	17	19	44	13	56	0	16	24	26	50	23	22	4	0	16	18	25	0	18	23	0	4	24	6	27	29	16	28	13	4	29	0	13	14	17	31	40	11	0	0
17:30:00	33	12	0	0	41	29	0	31	20	0	10	32	16	52	0	20	13	23	27	26	10	9	4	21	19	29	21	11	28	2	11	13	24	8	33	0	5	11	29	43	0	18	5	17	26	28	25	0	0
18:00:00	26	40	29	45	65	31	18	20	14	29	32	42	35	48	14	57	39	29	55	45	29	18	25	20	41	51	28	17	36	18	20	26	26	26	39	14	39	40	46	39	36	21	55	34	59	37	30	0	0
18:30:00	45	22	13	43	55	45	26	25	45	29	24	46	46	50	35	54	47	27	54	45	25	25	41	30	45	43	49	8	27	8	16	36	23	29	37	41	48	40	42	46	35	21	57	52	37	38	56	16	5
19:00:00	63	29	17	51	65	41	29	45	59	59	32	42	53	64	51	47	71	31	50	61	50	36	44	30	66	55	59	33	37	24	17	46	35	42	61	38	65	46	74	84	45	37	78	50	56	36	54	16	9
19:30:00	60	14	21	39	82	15	40	33	51	28	15	66	38	58	35	34	55	18	64	51	50	20	38	49	75	48	58	11	48	8	12	35	20	43	49	33	40	24	32	44	46	28	55	21	53	62	52	21	16
20:00:00	67	8	20	46	77	22	38	37	58	49	10	94	76	73	55	25	72	37	62	71	50	18	54	47	87	53	81	17	62	29	19	24	28	23	54	59	72	43	41	76	46	31	64	39	77	62	39	24	42
20:30:00	103	39	54	45	131	72	73	87	98	76	38	127	133	117	119	94	107	69	114	111	85	55	104	75	127	71	111	83	76	35	47	54	71	75	77	75	89	53	63	99	72	60	90	77	89	93	74	49	28
21:00:00	70	30	46	100	80	64	89	53	74	82	20	93	88	100	90	60	90	29	90	76	75	36	64	62	99	56	123	80	62	20	35	49	53	38	58	44	71	28	55	73	33	53	61	74	54	69	45	39	26
21:30:00	16	11	42	14	35	64	33	33	47	8	19	48	37	55	58	37	48	13	46	27	28	30	69	25	69	32	50	50	23	24	9	26	36	27	101	24	45	24	20	25	20	20	27	49	28	58	17	11	0
22:00:00	0	0	29	0	0	2	0	7	0	0	0	0	0	4	7	6	0	0	0	0	0	6	8	5	16	21	0	10	0	30	0	8	0	7	18	0	2	5	8	0	1	19	18	2	0	26	5	0	0
22:30:00	0	4	0	0	0	3	0	5	0	0	0	1	0	0	0	65	0	0	0	0	10	0	0	2	21	20	0	14	0	24	9	2	0	37	2	0	2	19	0	23	21	19	10	11	0	7	11	0	0
23:00:00	0	8	1	0	0	0	0	0	0	0	0	28	0	37	0	37	0	0	0	0	4	0	21	7	17	1	0	0	0	2	0	3	0	33	0	0	9	9	21	0	9	16	12	7	0	15	15	0	0
23:30:00	0	0	34	0	0	0	0	0	0	0	0	30	0	38	9	0	0	0	0	0	78	0	17	1	21	13	0	15	0	0	0	14	0	36	0	0	5	0	8	0	10	13	22	2	0	6	0	22	0
00:00:00	0	17	0	0	0	0	0	41	0	0	0	23	0	69	63	11	0	0	0	0	53	0	0	4	18	17	0	6	13	6	0	0	0	28	0	0	0	0	8	0	10	14	0	0	0	44	0	8	0
00:30:00	0	0	6	0	37	0	0	0	0	0	0	0	25	3	24	15	8	0	1	0	0	0	0	0	49	30	0	53	8	0	24	20	0	22	0	0	0	5	0	0	9	6	0	0	0	42	37	34	9
01:00:00	0	0	0	0	39	59	0	0	0	0	0	4	6	0	0	15	0	0	0	0	0	24	0	4	21	0	0	37	0	0	0	24	25	28	0	0	0	41	12	4	7	12	7	4	0	0	36	0	22
01:30:00	0	0	0	0	0	27	0	0	0	0	0	0	10	0	0	40	0	0	0	0	0	6	0	0	0	0	0	51	0	0	0	0	53	31	0	0	0	37	0	0	2	6	0	0	0	0	6	0	10
02:00:00	0	0	0	0	0	0	0	0	0	0	0	33	0	12	0	40	0	0	0	0	0	2	19	12	0	13	0	27	16	4	0	0	64	28	0	0	12	22	0	0	0	6	0	0	0	0	0	33	0
02:30:00	0	0	0	0	0	0	0	0	0	0	0	4	0	35	0	22	0	0	0	0	0	73	0	1	0	3	0	35	1	2	0	0	16	6	0	0	0	22	31	0	0	27	0	0	0	2	2	2	0
03:00:00	0	0	26	0	0	0	0	0	20	0	0	2	0	0	0	0	0	0	0	0	0	13	0	28	0	8	0	15	0	20	6	0	0	1	0	0	2	0	6	0	0	30	7	0	0	0	0	0	0
03:30:00	0	0	0	0	0	0	0	0	5	0	0	37	0	0	0	0	0	0	0	0	0	4	0	20	0	0	0	0	0	30	0	0	0	0	22	0	0	0	0	0	0	34	27	45	0	0	0	0	0
04:00:00	0	0	0	0	0	0	16	0	0	0	0	24	0	26	43	0	0	0	0	0	0	0	0	0	0	1	0	3	0	6	0	0	0	0	0	0	0	0	0	0	7	96	0	11	0	0	0	0	0
04:30:00	0	0	37	0	0	0	34	0	0	0	0	1	0	92	0	39	0	7	10	0	0	0	0	15	0	30	0	0	0	0	0	0	0	0	0	0	0	0	0	19	0	3	30	0	0	0	28	0	0
05:00:00	0	0	3	0	0	0	3	0	0	0	0	0	0	0	0	9	0	40	39	0	0	0	36	6	0	0	31	0	0	0	0	8	0	0	10	0	0	0	2	0	0	0	0	0	0	0	8	0	0
05:30:00	0	0	4	30	0	93	0	0	0	0	0	0	0	0	0	0	0	27	5	0	69	0	37	32	22	11	53	47	5	8	0	0	0	0	0	0	16	0	0	0	0	0	0	0	0	0	0	26	0
06:00:00	0	0	3	21	0	40	0	35	0	0	51	0	0	0	0	0	0	0	50	0	0	4	0	6	41	2	35	3	48	6	6	0	22	22	0	0	45	15	0	0	0	0	0	4	91	40	2	17	0
06:30:00	0	0	0	0	66	35	26	18	0	0	17	21	0	0	6	0	0	0	52	0	32	0	4	0	31	0	40	3	6	9	0	0	57	10	0	0	27	6	36	0	0	2	0	55	10	0	0	0	12
07:00:00	28	5	1	0	32	28	18	0	0	8	0	45	0	0	49	37	30	0	38	0	68	0	10	13	32	0	25	19	28	1	0	24	29	20	9	25	28	0	23	0	1	18	0	42	39	0	0	15	0
07:30:00	40	27	0	49	45	0	18	0	47	0	0	43	42	0	44	36	53	41	33	29	73	38	35	22	21	46	0	44	29	0	0	33	25	21	0	37	34	30	30	16	0	5	6	16	49	0	6	0	5
08:00:00	13	4	36	17	39	40	31	48	31	0	2	35	48	68	24	42	35	40	30	35	35	30	27	25	47	32	48	36	29	7	48	30	26	30	9	18	34	22	31	43	5	4	51	3	41	21	40	0	19
[truncated: 282 more columns]
