# Supplementary material for: High-fat diet enhances starvation-induced hyperactivity via sensitizing hunger-sensing neurons in Drosophila
Source: eLife journal article supplement (doi:10.7554/elife.53103), 2020-04-23
Supplement: supp [file elife-53103-supp-v1.zip › elife_poa_e53103_Figure_7_figure_supplement_1.pdf]

**Figure 7 – figure supplement 1**

| Protein    | Mean(HFD) | Mean(ND) | FoldChange |
|------------|-----------|----------|------------|
| Spt5       | 2246267   | 14483.5  | 155.09     |
| fs(1)N     | 606550    | 6754.1   | 89.80      |
| fon        | 2152300   | 28661    | 75.10      |
| yellow-f   | 1204840   | 33431.5  | 36.04      |
| Zasp67     | 2373967   | 67897.67 | 34.96      |
| Fkbp14     | 442890    | 26349    | 16.81      |
| CG11835    | 597690    | 39310    | 15.20      |
| wupA       | 3896733   | 266110   | 14.64      |
| up         | 9704700   | 682020   | 14.23      |
| EbpIII     | 9465933   | 700143.3 | 13.52      |
| ps         | 313256.7  | 25229    | 12.42      |
| CG30069    | 80875     | 6844.467 | 11.82      |
| Pect       | 1285830   | 114704   | 11.21      |
| cl         | 1859900   | 182010   | 10.22      |
| RpL35      | 18551000  | 1865233  | 9.95       |
| PGRP-SB1   | 10918233  | 1150600  | 9.49       |
| CTPsyn     | 391933.3  | 41764.5  | 9.38       |
| B52        | 8089367   | 869540   | 9.30       |
| Tm1        | 1698567   | 183915   | 9.24       |
| levy       | 5521933   | 598895   | 9.22       |
| CG11583    | 59047.33  | 6064000  | 0.01       |
| CG3800     | 44102     | 3060267  | 0.01       |
| Bap55      | 18786.33  | 1110087  | 0.02       |
| CG15784    | 16769     | 233556.7 | 0.07       |
| COX2       | 245860    | 1931500  | 0.13       |
| CG8417     | 150146.7  | 1161633  | 0.13       |
| yip7       | 512070    | 3887367  | 0.13       |
| CG11334    | 34703.5   | 255253.3 | 0.14       |
| CG8774     | 22960.67  | 159130   | 0.14       |
| GM130      | 43539.33  | 298606.7 | 0.15       |
| slgA       | 16584.53  | 105703.7 | 0.16       |
| Elp1       | 11282.67  | 71393.67 | 0.16       |
| Jhl-26     | 55973     | 336606.7 | 0.17       |
| Taldo      | 223103.3  | 1329970  | 0.17       |
| Galphao    | 41287.33  | 242873.3 | 0.17       |
| l(2)k09913 | 42732     | 225593.3 | 0.19       |
| spheroide  | 173284.5  | 892760   | 0.19       |
| GstE6      | 135883.3  | 699236.7 | 0.19       |
| DhpD       | 130434.3  | 670470   | 0.19       |
| CG33301    | 78626     | 382673.3 | 0.21       |

**Top40 differential expression proteins in fly hemolymph by HFD treatment**
