# Supplementary material for: High-fat diet enhances starvation-induced hyperactivity via sensitizing hunger-sensing neurons in Drosophila
Source: eLife journal article supplement (doi:10.7554/elife.53103), 2020-04-23
Supplement: supp [file elife-53103-supp-v1.zip › elife_poa_e53103_Figure_7_source_data_1.xlsx]

## Sheet: Fig7 A
Protein IDs	Fasta headers	iBAQ	ND-1	ND-2	ND-3	HFD-1	HFD-2	HFD-3	Ratio	LogRatio	p Value	LogP	Sig	SYMBOL
sp|A0A126GUP6-2|MP1_DROME	>sp|A0A126GUP6-2|MP1_DROME Isoform A of Melanization protease 1 OS=Drosophila melanogaster GN=MP1;>sp|A0A126GUP6-3|MP1_DROME Isoform C of Melanization protease 1 OS=Drosophila melanogaster GN=MP1;>sp|A0A126GUP6|MP1_DROME Melanization protease 1 OS=Drosophi	1173500	58496	60291	59583	557410	217840	219910	5.57919	2.48006	0.0733433	1.13464	0	NA
tr|A0A0B4LF92|A0A0B4LF92_DROME	>tr|A0A0B4LF92|A0A0B4LF92_DROME CG4646, isoform B OS=Drosophila melanogaster GN=CG4646 PE=4 SV=1;>sp|A1Z9A2|U587_DROME UPF0587 protein CG4646 OS=Drosophila melanogaster GN=CG4646 PE=2 SV=1	2900400	250840	334940		567710	472030	1274800	2.63414	1.39733	0.240963	0.618049	0	CG4646
sp|A1ZAB5|CLU_DROME	>sp|A1ZAB5|CLU_DROME Protein clueless OS=Drosophila melanogaster GN=clu PE=1 SV=1;>tr|A0A0B4KEX0|A0A0B4KEX0_DROME Protein clueless OS=Drosophila melanogaster GN=clu PE=1 SV=1	3153600	389550	266880	302300	1051900	563660	579350	2.28939	1.19497	0.0661899	1.17921	0	clu
tr|A0A0B4LFL2|A0A0B4LFL2_DROME	>tr|A0A0B4LFL2|A0A0B4LFL2_DROME Eukaryotic translation initiation factor 3 subunit C OS=Drosophila melanogaster GN=eIF3c PE=3 SV=1;>sp|A1ZAX1|EIF3C_DROME Eukaryotic translation initiation factor 3 subunit C OS=Drosophila melanogaster GN=eIF3-S8 PE=1 SV=1	9003200	870520	944960	976580	2097600	2034000	2079500	2.22456	1.15352	6.40151e-06	5.19372	1	eIF3-S8
sp|A8DYP0-3|OBSCN_DROME	>sp|A8DYP0-3|OBSCN_DROME Isoform E of Obscurin OS=Drosophila melanogaster GN=Unc-89;>sp|A8DYP0-2|OBSCN_DROME Isoform D of Obscurin OS=Drosophila melanogaster GN=Unc-89;>sp|A8DYP0|OBSCN_DROME Obscurin OS=Drosophila melanogaster GN=Unc-89 PE=1 SV=1;>sp|A8DYP	1140100	117970	113700	108560	343700	223140	233080	2.35112	1.23335	0.0167319	1.77646	1	Unc-89
sp|C0HK95|FAU_DROME	>sp|C0HK95|FAU_DROME Protein anoxia up-regulated OS=Drosophila melanogaster GN=fau PE=2 SV=1	3649100	328740	663850	580410	991220	478180	606720	1.31985	0.400371	0.413886	0.383119	0	NA
tr|X2JCX8|X2JCX8_DROME	>tr|X2JCX8|X2JCX8_DROME GEO12513p1 OS=Drosophila melanogaster GN=RpS14b PE=2 SV=1;>sp|C0HKA1|RS14B_DROME 40S ribosomal protein S14b OS=Drosophila melanogaster GN=RpS14b PE=2 SV=1;>sp|C0HKA0|RS14A_DROME 40S ribosomal protein S14a OS=Drosophila melanogaster	178600000	18437000	18325000	18434000	44092000	36399000	42918000	2.23583	1.16081	0.000684828	3.16442	1	RpS14a
tr|E2QD63|E2QD63_DROME	>tr|E2QD63|E2QD63_DROME Hsc/Hsp70-interacting protein related, isoform B OS=Drosophila melanogaster GN=HIP-R PE=4 SV=1;>sp|Q86DS1|F10A2_DROME Hsc70-interacting protein 2 OS=Drosophila melanogaster GN=HIP-R PE=1 SV=2;>sp|C4NYP8|F10A1_DROME Hsc70-interacting	1076200	119520	127030	189240	55179	257950	327270	1.46951	0.555338	0.465197	0.332363	0	HIP-R
sp|O01666|ATPG_DROME	>sp|O01666|ATPG_DROME ATP synthase subunit gamma, mitochondrial OS=Drosophila melanogaster GN=ATPsyngamma PE=2 SV=2	34277000	9696700	8819200	6534000	4927400	1879600	2419600	0.368329	-1.44093	0.0166188	1.7794	-1	ATPsyngamma
tr|X2JG23|X2JG23_DROME	>tr|X2JG23|X2JG23_DROME Misato, isoform B OS=Drosophila melanogaster GN=mst PE=4 SV=1;>sp|O01939|MST_DROME Protein misato OS=Drosophila melanogaster GN=mst PE=2 SV=1	33091			33091					-10			-1	mst
sp|O02002|CASP1_DROME	>sp|O02002|CASP1_DROME Caspase-1 OS=Drosophila melanogaster GN=Dcp-1 PE=1 SV=1	183660	98095	49991	35577					-10			-1	Dcp-1
sp|O02195|EIF3I_DROME	>sp|O02195|EIF3I_DROME Eukaryotic translation initiation factor 3 subunit I OS=Drosophila melanogaster GN=Trip1 PE=1 SV=1	14683000	1576100	1541100	1657200	4542200	2556300	2810100	2.07536	1.05336	0.0519831	1.28414	0	Trip1
sp|O02373|UGDH_DROME	>sp|O02373|UGDH_DROME UDP-glucose 6-dehydrogenase OS=Drosophila melanogaster GN=sgl PE=1 SV=1	3968500	419300	479520	285850	1224900	787840	771120	2.3499	1.2326	0.0286075	1.54352	1	sgl
sp|O02649|CH60_DROME	>sp|O02649|CH60_DROME 60 kDa heat shock protein, mitochondrial OS=Drosophila melanogaster GN=Hsp60 PE=1 SV=3	69649000	6025700	6127700	5564400	21337000	14851000	15744000	2.93106	1.55142	0.00499595	2.30138	1	Hsp60
sp|O16797|RL3_DROME	>sp|O16797|RL3_DROME 60S ribosomal protein L3 OS=Drosophila melanogaster GN=RpL3 PE=1 SV=3	136710000	14110000	10699000	12241000	37107000	30477000	32072000	2.68977	1.42748	0.000723754	3.14041	1	RpL3
tr|A8Y560|A8Y560_DROME	>tr|A8Y560|A8Y560_DROME Ribosomal protein L15 OS=Drosophila melanogaster GN=RpL15 PE=1 SV=2;>sp|O17445|RL15_DROME 60S ribosomal protein L15 OS=Drosophila melanogaster GN=RpL15 PE=1 SV=1	153210000	24933000	22519000	21482000	30529000	27144000	26604000	1.22258	0.289923	0.0328894	1.48294	0	RpL15
tr|X2J5T3|X2J5T3_DROME	>tr|X2J5T3|X2J5T3_DROME Rab6, isoform B OS=Drosophila melanogaster GN=Rab6 PE=1 SV=1;>sp|O18334|RAB6_DROME Ras-related protein Rab6 OS=Drosophila melanogaster GN=Rab6 PE=1 SV=1	343300	179140	164160						-10			-1	Rab6
sp|O18373|SPS1_DROME	>sp|O18373|SPS1_DROME Selenide, water dikinase OS=Drosophila melanogaster GN=SelD PE=2 SV=1	3262000	581550	600210	588420	513370	457260	521150	0.842728	-0.246861	0.0112399	1.94924	0	SelD
tr|M9PBM0|M9PBM0_DROME	>tr|M9PBM0|M9PBM0_DROME Kraken, isoform B OS=Drosophila melanogaster GN=kraken PE=4 SV=1;>sp|O18391|KRAK_DROME Probable serine hydrolase OS=Drosophila melanogaster GN=kraken PE=2 SV=1	525130	121040	69445	183930	150710			1.20756	0.272099	0.733339	0.134695	0	kraken
sp|O18404|HCD2_DROME	>sp|O18404|HCD2_DROME 3-hydroxyacyl-CoA dehydrogenase type-2 OS=Drosophila melanogaster GN=scu PE=1 SV=1	34061000	3991000	4748000	2675200	8797700	6367900	7480900	1.98406	0.988458	0.0156338	1.80593	0	scu
sp|O18413|PRS8_DROME	>sp|O18413|PRS8_DROME 26S protease regulatory subunit 8 OS=Drosophila melanogaster GN=Rpt6 PE=1 SV=2;>tr|Q9VA54|Q9VA54_DROME Regulatory particle triple-A ATPase 6-related OS=Drosophila melanogaster GN=Rpt6R PE=1 SV=1	8821700	2575500	2335100	2036100	911960	601130	361910	0.269912	-1.88944	0.00162158	2.79006	-1	Rpt6
tr|M9PCC1|M9PCC1_DROME	>tr|M9PCC1|M9PCC1_DROME Receptor of activated protein kinase C 1, isoform C OS=Drosophila melanogaster GN=Rack1 PE=4 SV=1;>sp|O18640|GBLP_DROME Guanine nucleotide-binding protein subunit beta-like protein OS=Drosophila melanogaster GN=Rack1 PE=1 SV=2;>tr|M	38522000	9907500	10185000	7512000	4181600	3568500	3167700	0.395508	-1.33822	0.00345824	2.46114	-1	Rack1
tr|E1JGV6|E1JGV6_DROME	>tr|E1JGV6|E1JGV6_DROME Nucleolar protein at 60B, isoform C OS=Drosophila melanogaster GN=Nop60B PE=1 SV=1;>sp|O44081|DKC1_DROME H/ACA ribonucleoprotein complex subunit 4 OS=Drosophila melanogaster GN=Nop60B PE=1 SV=1;>tr|A0A0B4K8B2|A0A0B4K8B2_DROME Nucleo	3471800	227130	281410	229760	986980	836650	909820	3.70236	1.88844	0.000143136	3.84425	1	Nop60B
tr|A0A0B4KGG9|A0A0B4KGG9_DROME	>tr|A0A0B4KGG9|A0A0B4KGG9_DROME C-terminal binding protein, isoform F OS=Drosophila melanogaster GN=CtBP PE=1 SV=1;>tr|A4V2S3|A4V2S3_DROME C-terminal binding protein, isoform B OS=Drosophila melanogaster GN=CtBP PE=1 SV=1;>sp|O46036-2|CTBP_DROME Isoform A	4738600	622150	847980	851290	1054100	419370	943780	1.04128	0.0583591	0.886447	0.0523471	0	CtBP
sp|O46098|BCN92_DROME	>sp|O46098|BCN92_DROME Protein bcn92 OS=Drosophila melanogaster GN=bcn92 PE=3 SV=1	687540	203640		252240	231650			1.01628	0.0232926	0.944029	0.0250148	0	bcn92
sp|O46106|NOI_DROME	>sp|O46106|NOI_DROME Splicing factor 3A subunit 3 OS=Drosophila melanogaster GN=noi PE=1 SV=1	27687	13971	13717						-10			-1	noi
tr|M9PIM0|M9PIM0_DROME	>tr|M9PIM0|M9PIM0_DROME Ribosomal protein L10, isoform E OS=Drosophila melanogaster GN=RpL10 PE=4 SV=1;>sp|O61231|RL10_DROME 60S ribosomal protein L10 OS=Drosophila melanogaster GN=RpL10 PE=1 SV=1	146400000	10604000	10418000	9004600	47342000	32634000	36397000	3.87566	1.95444	0.00291949	2.53469	1	RpL10
sp|O61305|DDX19_DROME	>sp|O61305|DDX19_DROME DEAD-box helicase Dbp80 OS=Drosophila melanogaster GN=Dbp80 PE=1 SV=1;>tr|Q5LK12|Q5LK12_DROME Dead box protein 80, isoform D OS=Drosophila melanogaster GN=Dbp80 PE=1 SV=1;>tr|L7EFC0|L7EFC0_DROME Dead box protein 80, isoform G OS=Dros	2113400	539230	404500	150170	473760	192800	352970	0.932014	-0.101577	0.868165	0.0613977	0	NA
sp|O61443|MK14B_DROME	>sp|O61443|MK14B_DROME Mitogen-activated protein kinase 14B OS=Drosophila melanogaster GN=p38b PE=1 SV=1	1686200	240630	322490	190720	311360	323980	296990	1.23677	0.306582	0.203613	0.691194	0	p38b
sp|O61613|NMT_DROME	>sp|O61613|NMT_DROME Glycylpeptide N-tetradecanoyltransferase OS=Drosophila melanogaster GN=Nmt PE=2 SV=2	591920	145390	115860	100640	172370	30988	26671	0.635632	-0.653735	0.425876	0.370717	0	Nmt
sp|O62619-2|KPYK_DROME	>sp|O62619-2|KPYK_DROME Isoform B of Pyruvate kinase OS=Drosophila melanogaster GN=PyK;>sp|O62619|KPYK_DROME Pyruvate kinase OS=Drosophila melanogaster GN=PyK PE=2 SV=2	178430000	31190000	30699000	24229000	41572000	24343000	26392000	1.07187	0.100125	0.743338	0.128814	0	PyK
sp|O62621|COPB2_DROME	>sp|O62621|COPB2_DROME Coatomer subunit beta OS=Drosophila melanogaster GN=betaCOP PE=2 SV=2	3789900	494780	528090	634320	842790	679520	610350	1.28691	0.363915	0.121136	0.916728	0	beta'COP
sp|O76454|PHS_DROME	>sp|O76454|PHS_DROME Pterin-4-alpha-carbinolamine dehydratase OS=Drosophila melanogaster GN=Pcd PE=1 SV=2	2300500		177310	261760	874190	455310	531970	2.82638	1.49896	0.0985162	1.00649	0	Pcd
sp|O76464|NFT1_DROME	>sp|O76464|NFT1_DROME Nitrilase and fragile histidine triad fusion protein NitFhit OS=Drosophila melanogaster GN=NitFhit PE=1 SV=1	2327600	484360	266130	105260	234370	797330	440100	1.71989	0.78232	0.357775	0.44639	0	NitFhit
sp|O76902|PKHF1_DROME	>sp|O76902|PKHF1_DROME Pleckstrin homology domain-containing family F member 1 homolog OS=Drosophila melanogaster GN=rush PE=1 SV=1	4267100	477610	551640	386240	1205800	830470	815310	2.01455	1.01046	0.0246691	1.60785	1	rush
sp|O76922|AUB_DROME	>sp|O76922|AUB_DROME Protein aubergine OS=Drosophila melanogaster GN=aub PE=1 SV=1;>sp|O76922-2|AUB_DROME Isoform C of Protein aubergine OS=Drosophila melanogaster GN=aub	361310	81377	99656	36646	18977	59857	64796	0.659825	-0.599845	0.356244	0.448252	0	aub
sp|O76927-2|RS21_DROME	>sp|O76927-2|RS21_DROME Isoform E of 40S ribosomal protein S21 OS=Drosophila melanogaster GN=RpS21;>tr|M9PEA6|M9PEA6_DROME 40S ribosomal protein S21 OS=Drosophila melanogaster GN=RpS21 PE=1 SV=1;>sp|O76927|RS21_DROME 40S ribosomal protein S21 OS=Drosophila	12613000	2505300	1540800	708770	4835500	1437100	1585200	1.65258	0.72472	0.445822	0.350838	0	RpS21
tr|X2JG90|X2JG90_DROME	>tr|X2JG90|X2JG90_DROME Serine/threonine-protein phosphatase OS=Drosophila melanogaster GN=Pp4-19C PE=3 SV=1;>sp|O76932|PP4C_DROME Serine/threonine-protein phosphatase 4 catalytic subunit OS=Drosophila melanogaster GN=Pp4-19C PE=2 SV=1	76299	76299							-10			-1	Pp4-19C
sp|O77410|EIF3E_DROME	>sp|O77410|EIF3E_DROME Eukaryotic translation initiation factor 3 subunit E OS=Drosophila melanogaster GN=eIF3-S6 PE=1 SV=1	7207300	797280	871820	482740	1992600	1710100	1352700	2.34934	1.23225	0.0117361	1.93048	1	Int6
tr|B7YZQ7|B7YZQ7_DROME	>tr|B7YZQ7|B7YZQ7_DROME Nucleosome remodeling factor-38kD, isoform B OS=Drosophila melanogaster GN=Nurf-38 PE=1 SV=1;>tr|A0A0B4K7G9|A0A0B4K7G9_DROME Nucleosome remodeling factor-38kD, isoform C OS=Drosophila melanogaster GN=Nurf-38 PE=1 SV=1;>sp|O77460|IPY	5466500	1572600	1183300	1340200	564660	459010	346660	0.334545	-1.57973	0.00216824	2.66389	-1	Nurf-38
sp|O96539-2|ATE1_DROME	>sp|O96539-2|ATE1_DROME Isoform A of Arginyl-tRNA--protein transferase 1 OS=Drosophila melanogaster GN=Ate1;>sp|O96539-4|ATE1_DROME Isoform C of Arginyl-tRNA--protein transferase 1 OS=Drosophila melanogaster GN=Ate1;>sp|O96539|ATE1_DROME Arginyl-tRNA--prot	651290	154980	185780	83681	207130	19729		0.801733	-0.318806	0.749064	0.125481	0	Ate1
sp|O96553-2|C1TC_DROME	>sp|O96553-2|C1TC_DROME Isoform A of C-1-tetrahydrofolate synthase, cytoplasmic OS=Drosophila melanogaster GN=pug;>tr|A0A0B4K623|A0A0B4K623_DROME Pugilist, isoform E OS=Drosophila melanogaster GN=pug PE=1 SV=1;>sp|O96553|C1TC_DROME C-1-tetrahydrofolate syn	23700000	4161300	3930600	2885100	4599300	3985700	4137800	1.15904	0.212932	0.250882	0.60053	0	pug
tr|X2JEB4|X2JEB4_DROME	>tr|X2JEB4|X2JEB4_DROME DNA topoisomerase OS=Drosophila melanogaster GN=Top3beta PE=1 SV=1;>sp|O96651|TOP3B_DROME DNA topoisomerase 3-beta OS=Drosophila melanogaster GN=Top3beta PE=2 SV=2	60529		8029.3	35421		17079		0.78614	-0.347143	0.876871	0.0570643	0	Top3beta
tr|A0A0B4LFL3|A0A0B4LFL3_DROME	>tr|A0A0B4LFL3|A0A0B4LFL3_DROME Elongation factor 1 beta, isoform C OS=Drosophila melanogaster GN=eEF1beta PE=3 SV=1;>sp|O96827|EF1B_DROME Probable elongation factor 1-beta OS=Drosophila melanogaster GN=Ef1beta PE=1 SV=3	2854100	605330	546800	252610	576940	485500	386920	1.03176	0.0451129	0.908959	0.0414557	0	Ef1beta
sp|O96838|FYV1_DROME	>sp|O96838|FYV1_DROME Putative 1-phosphatidylinositol 3-phosphate 5-kinase OS=Drosophila melanogaster GN=fab1 PE=1 SV=2	17957	7959.5	3816.8	6180.5					-10			-1	fab1
tr|A0A0B4KFC7|A0A0B4KFC7_DROME	>tr|A0A0B4KFC7|A0A0B4KFC7_DROME CG1315, isoform B OS=Drosophila melanogaster GN=CG1315 PE=3 SV=1;>sp|O97069|ASSY_DROME Argininosuccinate synthase OS=Drosophila melanogaster GN=CG1315 PE=2 SV=1	5579700	1767900	1114300	473290	785370	818550	620340	0.662872	-0.593198	0.375768	0.42508	0	CG1315
sp|O97125|HSP68_DROME	>sp|O97125|HSP68_DROME Heat shock protein 68 OS=Drosophila melanogaster GN=Hsp68 PE=1 SV=1	402220	75946	44250	40461	84317	81102	76142	1.50358	0.588404	0.0789182	1.10282	0	Hsp68
tr|M9PIA6|M9PIA6_DROME	>tr|M9PIA6|M9PIA6_DROME Mi-2, isoform D OS=Drosophila melanogaster GN=Mi-2 PE=1 SV=1;>tr|E1JI46|E1JI46_DROME Mi-2, isoform C OS=Drosophila melanogaster GN=Mi-2 PE=1 SV=1;>sp|O97159|CHDM_DROME Chromodomain-helicase-DNA-binding protein Mi-2 homolog OS=Drosop	356000	38794	34020	29912	28417	92044	132810	2.4655	1.30188	0.175073	0.756781	0	Mi-2
tr|X2JDR3|X2JDR3_DROME	>tr|X2JDR3|X2JDR3_DROME Sidekick, isoform I (Fragment) OS=Drosophila melanogaster GN=sdk PE=4 SV=1;>tr|X2JDB3|X2JDB3_DROME Sidekick, isoform H (Fragment) OS=Drosophila melanogaster GN=sdk PE=4 SV=1;>tr|E1JJC3|E1JJC3_DROME Sidekick, isoform B (Fragment) OS=	240040	15618	19156	15752	81195	61257	47063	3.75084	1.90721	0.00967342	2.01442	1	sdk
sp|O97477|INO1_DROME	>sp|O97477|INO1_DROME Inositol-3-phosphate synthase OS=Drosophila melanogaster GN=Inos PE=1 SV=1	33616000	3903100	3691600	3073800	8056500	7674300	7216900	2.15098	1.10499	0.000297498	3.52652	1	Inos
sp|P00334|ADH_DROME	>sp|P00334|ADH_DROME Alcohol dehydrogenase OS=Drosophila melanogaster GN=Adh PE=1 SV=2	226820000	39211000	35760000	37714000	40990000	38598000	34550000	1.01289	0.0184837	0.831157	0.0803169	0	Adh
sp|P00408|COX2_DROME	>sp|P00408|COX2_DROME Cytochrome c oxidase subunit 2 OS=Drosophila melanogaster GN=mt:CoII PE=3 SV=1	6040400	2095000	1982900	1716600		245860		0.12729	-2.97381	0.0172697	1.76272	-1	COX2
tr|X2J516|X2J516_DROME	>tr|X2J516|X2J516_DROME Trifunctional purine biosynthetic protein adenosine-3 OS=Drosophila melanogaster GN=ade3 PE=1 SV=1;>sp|P00967|PUR2_DROME Trifunctional purine biosynthetic protein adenosine-3 OS=Drosophila melanogaster GN=ade3 PE=1 SV=2	13880000	1563100	2206000	1487300	3241900	2596800	2785000	1.64061	0.714232	0.019612	1.70748	0	ade3
tr|E2QCP0|E2QCP0_DROME	>tr|E2QCP0|E2QCP0_DROME Histone H3 OS=Drosophila melanogaster GN=His3.3A PE=1 SV=2;>sp|P84249|H33_DROME Histone H3.3 OS=Drosophila melanogaster GN=His3.3A PE=1 SV=2;>sp|P02299|H3_DROME Histone H3 OS=Drosophila melanogaster GN=His3 PE=1 SV=4	10847000	1324200	1821700	2125400	1002000	1944700	2628900	1.05773	0.0809683	0.856553	0.0672458	0	His3.3B
sp|P02515|HSP22_DROME	>sp|P02515|HSP22_DROME Heat shock protein 22 OS=Drosophila melanogaster GN=Hsp22 PE=1 SV=4	265440	106700	158740						-10			-1	Hsp22
tr|M9NE68|M9NE68_DROME	>tr|M9NE68|M9NE68_DROME Heat shock protein 23, isoform B OS=Drosophila melanogaster GN=Hsp23 PE=3 SV=1;>sp|P02516|HSP23_DROME Heat shock protein 23 OS=Drosophila melanogaster GN=Hsp23 PE=2 SV=2	6493100	870280	699340	541870	2041500	826920	1513100	2.07508	1.05317	0.106284	0.973531	0	Hsp23
tr|X2JGG6|X2JGG6_DROME	>tr|X2JGG6|X2JGG6_DROME Heat shock protein 26, isoform B OS=Drosophila melanogaster GN=Hsp26 PE=3 SV=1;>sp|P02517|HSP26_DROME Heat shock protein 26 OS=Drosophila melanogaster GN=Hsp26 PE=1 SV=2	26098000	4970900	4317600	3926300	3910200	3900100	5072900	0.974907	-0.0366636	0.834023	0.0788221	0	Hsp26
tr|X2JC82|X2JC82_DROME	>tr|X2JC82|X2JC82_DROME Heat shock protein 27, isoform B OS=Drosophila melanogaster GN=Hsp27 PE=3 SV=1;>sp|P02518|HSP27_DROME Heat shock protein 27 OS=Drosophila melanogaster GN=Hsp27 PE=1 SV=2	49709000	10634000	4389500	4936300	8783100	8561700	12404000	1.49044	0.575734	0.23784	0.623716	0	Hsp27
sp|P02572|ACT2_DROME	>sp|P02572|ACT2_DROME Actin-42A OS=Drosophila melanogaster GN=Act42A PE=1 SV=3	640310	239800	230850	169660					-10			-1	Act42A
tr|M9PBL3|M9PBL3_DROME	>tr|M9PBL3|M9PBL3_DROME Heat shock protein 83, isoform B OS=Drosophila melanogaster GN=Hsp83 PE=3 SV=1;>sp|P02828|HSP83_DROME Heat shock protein 83 OS=Drosophila melanogaster GN=Hsp83 PE=1 SV=1	205820000	27666000	22450000	25259000	45480000	42563000	42407000	1.73068	0.791339	0.000530196	3.27556	0	Hsp83
tr|X2JD55|X2JD55_DROME	>tr|X2JD55|X2JD55_DROME Yolk protein 1, isoform B OS=Drosophila melanogaster GN=Yp1 PE=1 SV=1;>sp|P02843|VIT1_DROME Vitellogenin-1 OS=Drosophila melanogaster GN=Yp1 PE=1 SV=1	91092000	10252000	11700000	10025000	23099000	18043000	17973000	1.84867	0.88649	0.00701942	2.1537	0	Yp1
tr|X2JB25|X2JB25_DROME	>tr|X2JB25|X2JB25_DROME Yolk protein 2, isoform B OS=Drosophila melanogaster GN=Yp2 PE=1 SV=1;>sp|P02844|VIT2_DROME Vitellogenin-2 OS=Drosophila melanogaster GN=Yp2 PE=1 SV=2	149090000	20888000	15305000	13844000	45095000	26602000	27355000	1.97958	0.985191	0.0634503	1.19757	0	Yp2
sp|P04359|RL32_DROME	>sp|P04359|RL32_DROME 60S ribosomal protein L32 OS=Drosophila melanogaster GN=RpL32 PE=1 SV=3;>sp|P04359-2|RL32_DROME Isoform C of 60S ribosomal protein L32 OS=Drosophila melanogaster GN=RpL32	46426000	2881600	3932300	2227500	14550000	11188000	11646000	4.13476	2.0478	0.00125267	2.90216	1	RpL32
sp|P04814|TRYA_DROME	>sp|P04814|TRYA_DROME Trypsin alpha OS=Drosophila melanogaster GN=alphaTry PE=2 SV=1	3794300	1117000	1513000	785410	378930			0.332841	-1.58709	0.21271	0.672212	0	alphaTry
sp|P05031-2|DDC_DROME	>sp|P05031-2|DDC_DROME Isoform Hypoderm of Aromatic-L-amino-acid decarboxylase OS=Drosophila melanogaster GN=Ddc;>sp|P05031-3|DDC_DROME Isoform 3 of Aromatic-L-amino-acid decarboxylase OS=Drosophila melanogaster GN=Ddc;>sp|P05031|DDC_DROME Aromatic-L-amino	79800	58649	21151						-10			-1	Ddc
sp|P05205|HP1_DROME	>sp|P05205|HP1_DROME Heterochromatin protein 1 OS=Drosophila melanogaster GN=Su(var)205 PE=1 SV=2	349970	87398	79776	97854	84939			0.961472	-0.0566833	0.776174	0.110041	0	Su(var)205
tr|A4V3Q6|A4V3Q6_DROME	>tr|A4V3Q6|A4V3Q6_DROME Elongation factor 1-alpha OS=Drosophila melanogaster GN=eEF1alpha2 PE=1 SV=1;>sp|P05303|EF1A2_DROME Elongation factor 1-alpha 2 OS=Drosophila melanogaster GN=Ef1alpha100E PE=2 SV=2	10349000	845220	885810	676740	3265100	2439600	2236700	3.29824	1.7217	0.00454279	2.34268	1	Ef1alpha100E
sp|P05389|RLA2_DROME	>sp|P05389|RLA2_DROME 60S acidic ribosomal protein P2 OS=Drosophila melanogaster GN=RpLP2 PE=1 SV=1	4208000	813700	912350	317060	582440	733150	849280	1.0596	0.0835135	0.848902	0.0711427	0	RpLP2
sp|P05661-16|MYSA_DROME	>sp|P05661-16|MYSA_DROME Isoform C of Myosin heavy chain, muscle OS=Drosophila melanogaster GN=Mhc;>tr|M9NF46|M9NF46_DROME Myosin heavy chain, isoform R OS=Drosophila melanogaster GN=Mhc PE=1 SV=1;>sp|P05661-14|MYSA_DROME Isoform 15b of Myosin heavy chain,	10042			10042					-10			-1	Mhc
tr|M9ND95|M9ND95_DROME	>tr|M9ND95|M9ND95_DROME Myosin heavy chain, isoform U OS=Drosophila melanogaster GN=Mhc PE=1 SV=1;>sp|P05661-22|MYSA_DROME Isoform I of Myosin heavy chain, muscle OS=Drosophila melanogaster GN=Mhc;>sp|P05661-17|MYSA_DROME Isoform D of Myosin heavy chain, m	58032000	3048600	3453400	2943300	19292000	14520000	14775000	5.14404	2.3629	0.00111129	2.95417	1	Mhc
tr|E1JHJ4|E1JHJ4_DROME	>tr|E1JHJ4|E1JHJ4_DROME Myosin heavy chain, isoform N OS=Drosophila melanogaster GN=Mhc PE=1 SV=1;>sp|P05661-3|MYSA_DROME Isoform BABDB of Myosin heavy chain, muscle OS=Drosophila melanogaster GN=Mhc;>sp|P05661-21|MYSA_DROME Isoform H of Myosin heavy chain	41398	19423	21974						-10			-1	Mhc
tr|X2JFG0|X2JFG0_DROME	>tr|X2JFG0|X2JFG0_DROME Rudimentary, isoform D OS=Drosophila melanogaster GN=r PE=1 SV=1;>sp|P05990|PYR1_DROME CAD protein OS=Drosophila melanogaster GN=r PE=1 SV=3	1662600	290680	284350	238090	379520	213560	256400	1.04472	0.0631117	0.828533	0.0816903	0	r
sp|P06605|TBA3_DROME	>sp|P06605|TBA3_DROME Tubulin alpha-3 chain OS=Drosophila melanogaster GN=alphaTub84D PE=2 SV=1;>sp|P06603|TBA1_DROME Tubulin alpha-1 chain OS=Drosophila melanogaster GN=alphaTub84B PE=1 SV=1;>sp|P06604|TBA2_DROME Tubulin alpha-2 chain OS=Drosophila melano	87561000	12343000	14280000	10274000	25985000	12041000	12639000	1.37315	0.457486	0.383789	0.415908	0	alphaTub84D
sp|P06606|TBA4_DROME	>sp|P06606|TBA4_DROME Tubulin alpha-4 chain OS=Drosophila melanogaster GN=alphaTub67C PE=3 SV=1	7902200	1069600	1838600	1582300	1553500	725410	1132800	0.759762	-0.396381	0.335834	0.473875	0	alphaTub67C
tr|X2JEX8|X2JEX8_DROME	>tr|X2JEX8|X2JEX8_DROME Yolk protein 3, isoform B OS=Drosophila melanogaster GN=Yp3 PE=1 SV=1;>sp|P06607|VIT3_DROME Vitellogenin-3 OS=Drosophila melanogaster GN=Yp3 PE=1 SV=1	302250000	40452000	50935000	26892000	71643000	55994000	56335000	1.55541	0.637292	0.0648421	1.18814	0	Yp3
sp|P06754-3|TPM1_DROME	>sp|P06754-3|TPM1_DROME Isoform 9A of Tropomyosin-1, isoforms 9A/A/B OS=Drosophila melanogaster GN=Tm1;>sp|P06754-1|TPM1_DROME Isoform D of Tropomyosin-1, isoforms 9A/A/B OS=Drosophila melanogaster GN=Tm1;>sp|P49455-2|TPM4_DROME Isoform 34 of Tropomyosin-1	5647300	266080	70115	215550	1525700	1687800	1882200	9.23561	3.20721	0.000216751	3.66404	1	Tm1
tr|A0A0B4KGI5|A0A0B4KGI5_DROME	>tr|A0A0B4KGI5|A0A0B4KGI5_DROME Carboxylic ester hydrolase OS=Drosophila melanogaster GN=Ace PE=1 SV=1;>tr|E1JIJ8|E1JIJ8_DROME Carboxylic ester hydrolase OS=Drosophila melanogaster GN=Ace PE=1 SV=1;>sp|P07140|ACES_DROME Acetylcholinesterase OS=Drosophila m	47747	47747							-10			-1	Ace
sp|P07182|CH36_DROME	>sp|P07182|CH36_DROME Chorion protein S36 OS=Drosophila melanogaster GN=Cp36 PE=3 SV=2	2282300	218980	1402700	143230	290000	118910	108520	0.293176	-1.77016	0.36994	0.431868	0	Cp36
tr|E1JJF7|E1JJF7_DROME	>tr|E1JJF7|E1JJF7_DROME Chorion protein 38, isoform B OS=Drosophila melanogaster GN=Cp38 PE=4 SV=1;>sp|P07183|CH38_DROME Chorion protein S38 OS=Drosophila melanogaster GN=Cp38 PE=2 SV=1	3028300	613880	503340	368330	777420	356600	408760	1.03852	0.0545352	0.905107	0.0433002	0	Cp38
sp|P07184|CH18_DROME	>sp|P07184|CH18_DROME Chorion protein S18 OS=Drosophila melanogaster GN=Cp18 PE=2 SV=2	1805600	461030	412230	441500		210980	279890	0.56003	-0.836424	0.00879475	2.05578	0	Cp18
sp|P07185|CH15_DROME	>sp|P07185|CH15_DROME Chorion protein S15 OS=Drosophila melanogaster GN=Cp15 PE=3 SV=1	4753800	1166200	981800	1369500	575470	413540	247330	0.351483	-1.50847	0.00658515	2.18143	-1	Cp15
sp|P07186|CH19_DROME	>sp|P07186|CH19_DROME Chorion protein S19 OS=Drosophila melanogaster GN=Cp19 PE=2 SV=1	2031300	316670	313110	838420	220810	127160	215140	0.383538	-1.38256	0.163724	0.785888	0	Cp19
sp|P07190|MAL1_DROME	>sp|P07190|MAL1_DROME Maltase A1 OS=Drosophila melanogaster GN=Mal-A1 PE=2 SV=2	8120700	978340	1023000	1277100	1764300	1895200	1182800	1.47701	0.562683	0.0935525	1.02894	0	Mal-A1
sp|P07486|G3P1_DROME	>sp|P07486|G3P1_DROME Glyceraldehyde-3-phosphate dehydrogenase 1 OS=Drosophila melanogaster GN=Gapdh1 PE=2 SV=2	174420000	14859000	18773000	13635000	48803000	37146000	41201000	2.69004	1.42763	0.00208101	2.68173	1	Gapdh1
tr|M9PJN8|M9PJN8_DROME	>tr|M9PJN8|M9PJN8_DROME Glyceraldehyde-3-phosphate dehydrogenase OS=Drosophila melanogaster GN=Gapdh2 PE=3 SV=1;>sp|P07487|G3P2_DROME Glyceraldehyde-3-phosphate dehydrogenase 2 OS=Drosophila melanogaster GN=Gapdh2 PE=1 SV=2	304380000	56332000	29469000	57323000	59831000	52433000	48995000	1.12671	0.172114	0.565697	0.247416	0	Gapdh2
tr|C8VV14|C8VV14_DROME	>tr|C8VV14|C8VV14_DROME Fructose-bisphosphate aldolase OS=Drosophila melanogaster GN=Ald PE=1 SV=1;>sp|P07764|ALF_DROME Fructose-bisphosphate aldolase OS=Drosophila melanogaster GN=Ald PE=1 SV=5;>tr|F3YDE2|F3YDE2_DROME Fructose-bisphosphate aldolase OS=Dro	306100000	38324000	38451000	34591000	78349000	52795000	63592000	1.74861	0.806211	0.0208614	1.68066	0	Ald
sp|P07909-3|ROA1_DROME	>sp|P07909-3|ROA1_DROME Isoform E of Heterogeneous nuclear ribonucleoprotein A1 OS=Drosophila melanogaster GN=Hrb98DE;>tr|A4V3J6|A4V3J6_DROME Heterogeneous nuclear ribonucleoprotein at 98DE, isoform F OS=Drosophila melanogaster GN=Hrb98DE PE=1 SV=1;>sp|P07	8548700	365180	431440	564470	2786600	2426500	1974400	5.28069	2.40073	0.00131133	2.88229	1	Hrb98DE
sp|P08111-4|L2GL_DROME	>sp|P08111-4|L2GL_DROME Isoform D of Lethal(2) giant larvae protein OS=Drosophila melanogaster GN=l(2)gl;>sp|P08111-3|L2GL_DROME Isoform B of Lethal(2) giant larvae protein OS=Drosophila melanogaster GN=l(2)gl;>tr|M9NCX1|M9NCX1_DROME Lethal (2) giant larva	1702100	195040	229520	207640	533180	213950	322790	1.69238	0.75905	0.196462	0.706722	0	l(2)gl
sp|P08120|CO4A1_DROME	>sp|P08120|CO4A1_DROME Collagen alpha-1(IV) chain OS=Drosophila melanogaster GN=Cg25C PE=2 SV=3	923380	103740	95263	81912	211160	255280	176020	2.28703	1.19347	0.00715493	2.14539	1	Cg25C
tr|A0A0B4LGS0|A0A0B4LGS0_DROME	>tr|A0A0B4LGS0|A0A0B4LGS0_DROME Amylase proximal, isoform B OS=Drosophila melanogaster GN=Amy-p PE=3 SV=1;>sp|P81641|AMYB_DROME Alpha-amylase B OS=Drosophila melanogaster GN=Amy-d PE=3 SV=3;>sp|P08144|AMYA_DROME Alpha-amylase A OS=Drosophila melanogaster G	33449000	6487000	4353100	5302000	6643400	4995500	5667800	1.07215	0.100502	0.645204	0.190303	0	Amy-p
tr|C9QP21|C9QP21_DROME	>tr|C9QP21|C9QP21_DROME Carboxylic ester hydrolase OS=Drosophila melanogaster GN=Est-6 PE=1 SV=1;>sp|P08171|EST6_DROME Esterase-6 OS=Drosophila melanogaster GN=Est-6 PE=1 SV=2	28013000	5045500	4058000	2690100	7759100	4157000	4303500	1.37529	0.459734	0.339268	0.469457	0	Est-6
tr|A4V2B8|A4V2B8_DROME	>tr|A4V2B8|A4V2B8_DROME Casein kinase IIalpha, isoform C OS=Drosophila melanogaster GN=CkIIalpha PE=1 SV=1;>sp|P08181|CSK2A_DROME Casein kinase II subunit alpha OS=Drosophila melanogaster GN=CkIIalpha PE=1 SV=2	789250		45760	124220		619270		7.28639	2.8652	0.0805313	1.09404	0	CkIIalpha
tr|A0A0B4LI86|A0A0B4LI86_DROME	>tr|A0A0B4LI86|A0A0B4LI86_DROME DNA-directed RNA polymerase subunit beta OS=Drosophila melanogaster GN=RpII140 PE=3 SV=1;>sp|P08266|RPB2_DROME DNA-directed RNA polymerase II subunit RPB2 OS=Drosophila melanogaster GN=RpII140 PE=2 SV=2	108230	22611	16269	29736		14880	24730	0.865906	-0.207718	0.655804	0.183226	0	RpII140
tr|M9PBK5|M9PBK5_DROME	>tr|M9PBK5|M9PBK5_DROME Ribosomal protein LP1, isoform B OS=Drosophila melanogaster GN=RpLP1 PE=3 SV=1;>sp|P08570|RLA1_DROME 60S acidic ribosomal protein P1 OS=Drosophila melanogaster GN=RpLP1 PE=1 SV=2	19086000	1939200	1924200	2033700	4969600	4180700	4038800	2.23654	1.16127	0.00113125	2.94644	1	RpLP1
tr|M9MRT6|M9MRT6_DROME	>tr|M9MRT6|M9MRT6_DROME Rap1 GTPase, isoform B OS=Drosophila melanogaster GN=Rap1 PE=4 SV=1;>sp|P08645|RAS3_DROME Ras-like protein 3 OS=Drosophila melanogaster GN=R PE=2 SV=2	2359400	792580	820640	746220					-10			-1	Rap1
tr|C6TP87|C6TP87_DROME	>tr|C6TP87|C6TP87_DROME Elongation factor 1-alpha OS=Drosophila melanogaster GN=eEF1alpha1 PE=1 SV=1;>sp|P08736|EF1A1_DROME Elongation factor 1-alpha 1 OS=Drosophila melanogaster GN=Ef1alpha48D PE=1 SV=2	453480000	65229000	63728000	59087000	97417000	72000000	96016000	1.41155	0.497277	0.0379687	1.42057	0	Ef1alpha48D
tr|Q7KUN2|Q7KUN2_DROME	>tr|Q7KUN2|Q7KUN2_DROME Ecdysone-induced protein 28/29kD, isoform C OS=Drosophila melanogaster GN=Eip71CD PE=1 SV=1;>tr|Q7KUM8|Q7KUM8_DROME Ecdysone-induced protein 28/29kD, isoform E OS=Drosophila melanogaster GN=Eip71CD PE=1 SV=2;>tr|M9PI66|M9PI66_DROME	391760	246620	145140						-10			-1	Eip71CD
tr|A0A0B4LJ12|A0A0B4LJ12_DROME	>tr|A0A0B4LJ12|A0A0B4LJ12_DROME Nucleoside diphosphate kinase OS=Drosophila melanogaster GN=awd PE=1 SV=1;>sp|P08879|NDKA_DROME Nucleoside diphosphate kinase OS=Drosophila melanogaster GN=awd PE=1 SV=3;>tr|A0A0B4LHX6|A0A0B4LHX6_DROME Nucleoside diphosphate	52752000	11594000	10658000	9815000	6262100	6897200	7525800	0.645059	-0.632497	0.00383316	2.41644	0	awd
tr|M9NE89|M9NE89_DROME	>tr|M9NE89|M9NE89_DROME Lamin, isoform B OS=Drosophila melanogaster GN=Lam PE=4 SV=1;>sp|P08928|LAM0_DROME Lamin Dm0 OS=Drosophila melanogaster GN=Lam PE=1 SV=4	455860			36960	95425	125160	198320	3.778	1.91762	0.235119	0.628712	0	Lam
tr|Q4AB57|Q4AB57_DROME	>tr|Q4AB57|Q4AB57_DROME Histone H2A OS=Drosophila melanogaster GN=His2A:CG33859 PE=3 SV=1;>sp|P84051|H2A_DROME Histone H2A OS=Drosophila melanogaster GN=His2A PE=1 SV=2;>tr|A0A0B4KH25|A0A0B4KH25_DROME Histone H2A OS=Drosophila melanogaster GN=His2Av PE=3 S	898400	259120	265290			174000	199990	0.713163	-0.487696	0.0301189	1.52116	0	His2A:CG33859
tr|M9PBB5|M9PBB5_DROME	>tr|M9PBB5|M9PBB5_DROME Vasa, isoform B OS=Drosophila melanogaster GN=vas PE=3 SV=1;>sp|P09052|VASA1_DROME ATP-dependent RNA helicase vasa, isoform A OS=Drosophila melanogaster GN=vas PE=1 SV=3	1835600	410360	322180	272210	380410	199880	250540	0.826902	-0.274211	0.437208	0.359312	0	NA
sp|P09180|RL4_DROME	>sp|P09180|RL4_DROME 60S ribosomal protein L4 OS=Drosophila melanogaster GN=RpL4 PE=1 SV=2	113690000	13947000	12489000	9655600	30598000	21393000	25608000	2.15006	1.10437	0.00930658	2.03121	1	RpL4
tr|A0A0B4KHJ9|A0A0B4KHJ9_DROME	>tr|A0A0B4KHJ9|A0A0B4KHJ9_DROME Tropomyosin 2, isoform E OS=Drosophila melanogaster GN=Tm2 PE=1 SV=1;>sp|P09491-2|TPM2_DROME Isoform Embryonic of Tropomyosin-2 OS=Drosophila melanogaster GN=Tm2;>sp|P09491|TPM2_DROME Tropomyosin-2 OS=Drosophila melanogaster	6136500		32134	50769	581530	3178700	2293400	48.6804	5.60527	0.138213	0.859452	0	Tm2
sp|P10351|XDH_DROME	>sp|P10351|XDH_DROME Xanthine dehydrogenase OS=Drosophila melanogaster GN=ry PE=2 SV=2	1531500	262810	316770	275180	363270	180830	132620	0.791708	-0.33696	0.456753	0.340319	0	ry
tr|H5V8A9|H5V8A9_DROME	>tr|H5V8A9|H5V8A9_DROME FI18803p1 OS=Drosophila melanogaster GN=otu PE=2 SV=1;>sp|P10383-2|OTU_DROME Isoform A of Protein ovarian tumor locus OS=Drosophila melanogaster GN=otu;>sp|P10383|OTU_DROME Protein ovarian tumor locus OS=Drosophila melanogaster GN=o	86634			26345		23081	37207	1.1442	0.194342	0.808314	0.0924198	0	otu
tr|B7Z0L1|B7Z0L1_DROME	>tr|B7Z0L1|B7Z0L1_DROME Fasciclin 1, isoform E OS=Drosophila melanogaster GN=Fas1 PE=1 SV=1;>tr|B7Z0L0|B7Z0L0_DROME Fasciclin 1, isoform F OS=Drosophila melanogaster GN=Fas1 PE=1 SV=1;>tr|Q9VES3|Q9VES3_DROME FI05280p OS=Drosophila melanogaster GN=Fas1 PE=1	3603700	378330	756630	538540	729240	547930	653070	1.15341	0.205912	0.520313	0.283735	0	Fas1
tr|X2JCP8|X2JCP8_DROME	>tr|X2JCP8|X2JCP8_DROME Actin 5C, isoform E OS=Drosophila melanogaster GN=Act5C PE=3 SV=1;>sp|P10987|ACT1_DROME Actin-5C OS=Drosophila melanogaster GN=Act5C PE=1 SV=4	30200000	5268800	5683300	6329700	4842100	4249600	3826700	0.747515	-0.419826	0.0270454	1.56791	0	Act5C
sp|P11046|LAMB1_DROME	>sp|P11046|LAMB1_DROME Laminin subunit beta-1 OS=Drosophila melanogaster GN=LanB1 PE=1 SV=4	743400	63123	51723	30182	225460	199210	173700	4.12589	2.04471	0.00105372	2.97727	1	LanB1
tr|C7LA75|C7LA75_DROME	>tr|C7LA75|C7LA75_DROME Heat shock protein cognate 4, isoform G OS=Drosophila melanogaster GN=Hsc70-4 PE=1 SV=1;>sp|P11147|HSP7D_DROME Heat shock 70 kDa protein cognate 4 OS=Drosophila melanogaster GN=Hsc70-4 PE=1 SV=3	266760000	36932000	30810000	31710000	60263000	57494000	49552000	1.68231	0.750443	0.00375043	2.42592	0	Hsc70-4
sp|P11995|LSP1A_DROME	>sp|P11995|LSP1A_DROME Larval serum protein 1 alpha chain OS=Drosophila melanogaster GN=Lsp1alpha PE=2 SV=3	960660	242880	243410	222030	95200	76345	80798	0.356256	-1.48902	7.37267e-05	4.13238	-1	Lsp1alpha
tr|X2J8F5|X2J8F5_DROME	>tr|X2J8F5|X2J8F5_DROME Larval serum protein 1 beta, isoform B OS=Drosophila melanogaster GN=Lsp1beta PE=4 SV=1;>sp|P11996|LSP1B_DROME Larval serum protein 1 beta chain OS=Drosophila melanogaster GN=Lsp1beta PE=2 SV=3	5294100	1676700	1312600	1286900	471570	161120	385140	0.238022	-2.07083	0.002248	2.6482	-1	Lsp1beta
sp|P11997|LSP1G_DROME	>sp|P11997|LSP1G_DROME Larval serum protein 1 gamma chain OS=Drosophila melanogaster GN=Lsp1gamma PE=2 SV=2	8709500	2192100	1734000	1824900	1395000	768950	794600	0.514441	-0.958923	0.0198597	1.70203	0	Lsp1gamma
sp|P12370|KAPC_DROME	>sp|P12370|KAPC_DROME cAMP-dependent protein kinase catalytic subunit OS=Drosophila melanogaster GN=Pka-C1 PE=1 SV=3	2760600	671640	198560	433070	485410	673670	298230	1.1182	0.161172	0.783022	0.106226	0	Pka-C1
tr|A4V391|A4V391_DROME	>tr|A4V391|A4V391_DROME Tcp1-like, isoform B OS=Drosophila melanogaster GN=CCT1 PE=1 SV=1;>sp|P12613|TCPA_DROME T-complex protein 1 subunit alpha OS=Drosophila melanogaster GN=T-cp1 PE=2 SV=2	3523000	803230	789890	735940	431350	393920	368710	0.512645	-0.963969	0.000160871	3.79352	0	T-cp1
sp|P12646|G6PD_DROME	>sp|P12646|G6PD_DROME Glucose-6-phosphate 1-dehydrogenase OS=Drosophila melanogaster GN=Zw PE=1 SV=2;>tr|X2JEF0|X2JEF0_DROME Glucose-6-phosphate 1-dehydrogenase OS=Drosophila melanogaster GN=Zw PE=1 SV=1;>sp|P12646-2|G6PD_DROME Isoform B of Glucose-6-phosp	5196900	1543600	1112900	1249700	422840	488210	379720	0.330441	-1.59753	0.00264118	2.5782	-1	Zw
tr|I0DHK3|I0DHK3_DROME	>tr|I0DHK3|I0DHK3_DROME Proteasome subunit alpha type OS=Drosophila melanogaster GN=Prosalpha6 PE=2 SV=1;>sp|P12881|PSA1_DROME Proteasome subunit alpha type-1 OS=Drosophila melanogaster GN=Prosalpha6 PE=1 SV=1	14592000	1704300	1709400	1183200	4514500	2595000	2885700	2.17433	1.12057	0.0444902	1.35174	1	Prosalpha6
sp|Q05547|PP13_DROME	>sp|Q05547|PP13_DROME Serine/threonine-protein phosphatase alpha-3 isoform OS=Drosophila melanogaster GN=Pp1-13C PE=1 SV=1;>sp|P12982|PP12_DROME Serine/threonine-protein phosphatase alpha-2 isoform OS=Drosophila melanogaster GN=Pp1-87B PE=1 SV=1	2802300	303390	784720	555400	132260	540640	485940	0.705101	-0.504099	0.440725	0.355832	0	Pp1-13C
tr|M9PG47|M9PG47_DROME	>tr|M9PG47|M9PG47_DROME 40S ribosomal protein S26 OS=Drosophila melanogaster GN=RpS26 PE=3 SV=1;>sp|P13008|RS26_DROME 40S ribosomal protein S26 OS=Drosophila melanogaster GN=RpS26 PE=1 SV=1	86467000	8558300	7593400	8263600	24719000	17549000	19784000	2.54152	1.34569	0.004207	2.37603	1	RpS26
sp|P13060|EF2_DROME	>sp|P13060|EF2_DROME Elongation factor 2 OS=Drosophila melanogaster GN=EF2 PE=1 SV=4	128200000	20883000	20276000	17284000	25574000	22180000	22008000	1.19368	0.255411	0.0788179	1.10338	0	EF2
sp|P13395|SPTCA_DROME	>sp|P13395|SPTCA_DROME Spectrin alpha chain OS=Drosophila melanogaster GN=alpha-Spec PE=1 SV=2;>tr|M9PDQ0|M9PDQ0_DROME Alpha spectrin, isoform D OS=Drosophila melanogaster GN=alpha-Spec PE=4 SV=1;>tr|M9PBI5|M9PBI5_DROME Alpha spectrin, isoform C OS=Drosoph	177890	29749	15581	18333	44591	34049	35587	1.79424	0.843377	0.0363344	1.43968	0	alpha-Spec
tr|A0A0B4K7G4|A0A0B4K7G4_DROME	>tr|A0A0B4K7G4|A0A0B4K7G4_DROME Modulo, isoform C OS=Drosophila melanogaster GN=mod PE=1 SV=1;>sp|P13469|MODU_DROME DNA-binding protein modulo OS=Drosophila melanogaster GN=mod PE=1 SV=2	43677000	19195000	1834100	9581300	4796200	4340400	3930200	0.426875	-1.22812	0.30942	0.509451	0	mod
tr|E1JIR4|E1JIR4_DROME	>tr|E1JIR4|E1JIR4_DROME Sodium/potassium-transporting ATPase subunit alpha OS=Drosophila melanogaster GN=Atpalpha PE=1 SV=1;>tr|A0A0B4KGG8|A0A0B4KGG8_DROME Sodium/potassium-transporting ATPase subunit alpha OS=Drosophila melanogaster GN=Atpalpha PE=1 SV=1;	7709800	1858400	1866900	1806600	749380	485770	942730	0.393695	-1.34485	0.00112047	2.9506	-1	Atpalpha
tr|M9PC43|M9PC43_DROME	>tr|M9PC43|M9PC43_DROME Glycerol-3-phosphate dehydrogenase [NAD(+)] OS=Drosophila melanogaster GN=Gpdh PE=1 SV=1;>sp|P13706-2|GPDA_DROME Isoform GPDH-1 of Glycerol-3-phosphate dehydrogenase [NAD(+)], cytoplasmic OS=Drosophila melanogaster GN=Gpdh;>tr|M9PET	95717000	14798000	11250000	8115500	24277000	17075000	20201000	1.80172	0.849373	0.0324914	1.48823	0	Gpdh
sp|P14318|MP20_DROME	>sp|P14318|MP20_DROME Muscle-specific protein 20 OS=Drosophila melanogaster GN=Mp20 PE=2 SV=2	9646600	1294000	1014200	1666200	1792300	1939700	1940300	1.42721	0.513197	0.0441157	1.35541	0	Mp20
tr|E1JHR5|E1JHR5_DROME	>tr|E1JHR5|E1JHR5_DROME Enolase, isoform F OS=Drosophila melanogaster GN=Eno PE=1 SV=1;>sp|P15007-2|ENO_DROME Isoform A of Enolase OS=Drosophila melanogaster GN=Eno;>sp|P15007|ENO_DROME Enolase OS=Drosophila melanogaster GN=Eno PE=1 SV=2	111940000	10377000	10799000	9904500	30645000	24730000	25486000	2.60166	1.37943	0.000902719	3.04445	1	Eno
tr|X2JAW6|X2JAW6_DROME	>tr|X2JAW6|X2JAW6_DROME Laminin B2, isoform B OS=Drosophila melanogaster GN=LanB2 PE=4 SV=1;>sp|P15215|LAMC1_DROME Laminin subunit gamma-1 OS=Drosophila melanogaster GN=LanB2 PE=2 SV=2	935340	20955	9600.8	66566	330780	246810	260630	8.63061	3.10946	0.00139124	2.8566	1	LanB2
tr|X2J6N7|X2J6N7_DROME	>tr|X2J6N7|X2J6N7_DROME Fasciclin 3, isoform F OS=Drosophila melanogaster GN=Fas3 PE=4 SV=1;>sp|P15278-2|FAS3_DROME Isoform B of Fasciclin-3 OS=Drosophila melanogaster GN=Fas3;>tr|Q8INX7|Q8INX7_DROME Fasciclin 3, isoform C OS=Drosophila melanogaster GN=Fas	11650000	705460	557010	779050	3377200	3015300	3215600	4.70635	2.23461	3.38045e-05	4.47103	1	Fas3
sp|P15348|TOP2_DROME	>sp|P15348|TOP2_DROME DNA topoisomerase 2 OS=Drosophila melanogaster GN=Top2 PE=1 SV=1	176390			5952.1	92552	36780	41108	9.54509	3.25476	0.291531	0.535315	0	Top2
sp|P15357|RS27A_DROME	>sp|P15357|RS27A_DROME Ubiquitin-40S ribosomal protein S27a OS=Drosophila melanogaster GN=RpS27A PE=1 SV=2;>tr|Q7JYK1|Q7JYK1_DROME RE10554p OS=Drosophila melanogaster GN=RpL40 PE=1 SV=1;>sp|P18101|RL40_DROME Ubiquitin-60S ribosomal protein L40 OS=Drosophil	452240000	62715000	102980000	67580000	104590000	62299000	52075000	0.938652	-0.091338	0.827243	0.0823666	0	RpS27A
sp|P16163|URIC_DROME	>sp|P16163|URIC_DROME Uricase OS=Drosophila melanogaster GN=Uro PE=2 SV=2	606790	127630	220390	47366	53128	61592	96682	0.534672	-0.903273	0.301489	0.520728	0	Uro
tr|A0A0B4KH09|A0A0B4KH09_DROME	>tr|A0A0B4KH09|A0A0B4KH09_DROME Groucho, isoform I OS=Drosophila melanogaster GN=gro PE=1 SV=1;>tr|A0A0B4K6L6|A0A0B4K6L6_DROME Groucho, isoform H OS=Drosophila melanogaster GN=gro PE=1 SV=1;>tr|A0A0B4LHP1|A0A0B4LHP1_DROME Groucho, isoform J OS=Drosophila m	500730	131130	112350	86636	83884	64211	22525	0.516849	-0.952186	0.0749075	1.12547	0	gro
sp|P16378-2|GNAO_DROME	>sp|P16378-2|GNAO_DROME Isoform B of G protein alpha o subunit OS=Drosophila melanogaster GN=Galphao;>sp|P16378|GNAO_DROME G protein alpha o subunit OS=Drosophila melanogaster GN=Galphao PE=1 SV=1	852490	303800	114640	310180	66520	36050	21292	0.169995	-2.55643	0.0370344	1.43139	-1	Galphao
sp|P16905-3|KAPR1_DROME	>sp|P16905-3|KAPR1_DROME Isoform 3 of cAMP-dependent protein kinase type I regulatory subunit OS=Drosophila melanogaster GN=Pka-R1;>sp|P16905-4|KAPR1_DROME Isoform E of cAMP-dependent protein kinase type I regulatory subunit OS=Drosophila melanogaster GN=P	292140	117290	75223		99623			1.03497	0.0495949	0.941338	0.0262543	0	Pka-R1
tr|M9PC89|M9PC89_DROME	>tr|M9PC89|M9PC89_DROME Small ribonucleoprotein particle U1 subunit 70K, isoform C OS=Drosophila melanogaster GN=snRNP-U1-70K PE=4 SV=1;>sp|P17133|RU17_DROME U1 small nuclear ribonucleoprotein 70 kDa OS=Drosophila melanogaster GN=snRNP-U1-70K PE=1 SV=2	170160	55982	36842				77337	1.66631	0.736661	0.313236	0.504129	0	snRNP-U1-70K
sp|P17210|KINH_DROME	>sp|P17210|KINH_DROME Kinesin heavy chain OS=Drosophila melanogaster GN=Khc PE=1 SV=2	10190000	718590	699430	727940	2976200	2648400	2419400	3.74844	1.90629	0.000263202	3.57971	1	Khc
sp|P17336|CATA_DROME	>sp|P17336|CATA_DROME Catalase OS=Drosophila melanogaster GN=Cat PE=1 SV=2	93068000	8366800	7942000	7013800	24757000	21928000	23060000	2.99045	1.58036	7.13632e-05	4.14653	1	Cat
sp|P17704|RS17_DROME	>sp|P17704|RS17_DROME 40S ribosomal protein S17 OS=Drosophila melanogaster GN=RpS17 PE=1 SV=2	8170700	1137100	1505100	1131600	2530200	831810	1035000	1.16514	0.220505	0.724633	0.139882	0	RpS17
sp|P17917|PCNA_DROME	>sp|P17917|PCNA_DROME Proliferating cell nuclear antigen OS=Drosophila melanogaster GN=PCNA PE=1 SV=2	15770000	2794600	2349800	1912700	3354000	2541100	2817200	1.23454	0.303978	0.189011	0.723513	0	PCNA
sp|P18053|PSA4_DROME	>sp|P18053|PSA4_DROME Proteasome subunit alpha type-4 OS=Drosophila melanogaster GN=Prosalpha3 PE=1 SV=2	3399900	1017700	1257700	669040	354360		101070	0.232012	-2.10773	0.0516197	1.28718	0	Prosalpha3
tr|M9MS06|M9MS06_DROME	>tr|M9MS06|M9MS06_DROME Alpha actinin, isoform D OS=Drosophila melanogaster GN=Actn PE=1 SV=1;>sp|P18091-4|ACTN_DROME Isoform Adult muscle of Alpha-actinin, sarcomeric OS=Drosophila melanogaster GN=Actn;>tr|M9PGA7|M9PGA7_DROME Alpha actinin, isoform G OS=D	4921700	871320	459480	314930	1172300	1124800	978920	1.99062	0.993216	0.0369969	1.43183	0	Actn
tr|M9NG31|M9NG31_DROME	>tr|M9NG31|M9NG31_DROME Defective chorion 1, isoform G OS=Drosophila melanogaster GN=dec-1 PE=4 SV=1;>sp|P18171|DEC13_DROME Defective chorion-1 protein, FC177 isoform OS=Drosophila melanogaster GN=dec-1 PE=2 SV=2;>sp|P18170|DEC12_DROME Defective chorion-1	609260	101630	122400	76841	99372	113110	95907	1.02499	0.0356062	0.86829	0.0613354	0	2019-12-01
sp|P18431-4|SGG_DROME	>sp|P18431-4|SGG_DROME Isoform G of Protein kinase shaggy OS=Drosophila melanogaster GN=sgg;>tr|A4V3W2|A4V3W2_DROME Shaggy, isoform C OS=Drosophila melanogaster GN=sgg PE=1 SV=1;>sp|P18431|SGG_DROME Protein kinase shaggy OS=Drosophila melanogaster GN=sgg P	943200	246450	208280	85795	221390	91771	89518	0.744978	-0.424731	0.519709	0.28424	0	sgg
sp|P18432|MLR_DROME	>sp|P18432|MLR_DROME Myosin regulatory light chain 2 OS=Drosophila melanogaster GN=Mlc2 PE=1 SV=2	1878000	116320			831720	463290	466690	5.04843	2.33583	0.193947	0.712317	0	Mlc2
sp|P18932|NU5M_DROME	>sp|P18932|NU5M_DROME NADH-ubiquinone oxidoreductase chain 5 OS=Drosophila melanogaster GN=mt:ND5 PE=3 SV=4	340010	112780	138290	88940					-10			-1	ND5
tr|E1JJ68|E1JJ68_DROME	>tr|E1JJ68|E1JJ68_DROME Rm62, isoform H OS=Drosophila melanogaster GN=Rm62 PE=1 SV=1;>sp|P19109-3|DDX17_DROME Isoform D of ATP-dependent RNA helicase p62 OS=Drosophila melanogaster GN=Rm62;>tr|C7LAE4|C7LAE4_DROME LP18603p OS=Drosophila melanogaster GN=Rm62	2206500	270060	310170	295020	512140	446090	372990	1.52096	0.604982	0.0221302	1.65501	0	Rm62
sp|P19351-6|TNNT_DROME	>sp|P19351-6|TNNT_DROME Isoform 6 of Troponin T, skeletal muscle OS=Drosophila melanogaster GN=up;>tr|M9PJM6|M9PJM6_DROME Upheld, isoform Q OS=Drosophila melanogaster GN=up PE=1 SV=1;>sp|P19351-8|TNNT_DROME Isoform 8 of Troponin T, skeletal muscle OS=Droso	3275100	268940	213550	166470	1073200	911320	641630	4.04671	2.01675	0.00699816	2.15502	1	up
sp|P19351-12|TNNT_DROME	>sp|P19351-12|TNNT_DROME Isoform 12 of Troponin T, skeletal muscle OS=Drosophila melanogaster GN=up;>tr|M9NH07|M9NH07_DROME Upheld, isoform N OS=Drosophila melanogaster GN=up PE=1 SV=1;>sp|P19351-5|TNNT_DROME Isoform 5 of Troponin T, skeletal muscle OS=Dro	31160000	717870	820650	507540	9461000	9209100	10444000	14.2293	3.8308	2.02344e-05	4.69391	1	up
tr|M9PG76|M9PG76_DROME	>tr|M9PG76|M9PG76_DROME 60S acidic ribosomal protein P0 OS=Drosophila melanogaster GN=RpLP0 PE=3 SV=1;>sp|P19889|RLA0_DROME 60S acidic ribosomal protein P0 OS=Drosophila melanogaster GN=RpLP0 PE=1 SV=1	14764000	2019600	2490200	1678500	4566200	2105100	1904200	1.38576	0.470678	0.420653	0.376076	0	RpLP0
tr|M9PD26|M9PD26_DROME	>tr|M9PD26|M9PD26_DROME Cytochrome b5-related, isoform B OS=Drosophila melanogaster GN=Cyt-b5-r PE=4 SV=1;>sp|P19967|CYB5R_DROME Cytochrome b5-related protein OS=Drosophila melanogaster GN=Cyt-b5-r PE=2 SV=2	3646600	180340	234120	259500	987260	935510	1049900	4.41075	2.14102	4.58625e-05	4.33854	1	Cyt-b5-r
sp|P20028|RPA2_DROME	>sp|P20028|RPA2_DROME DNA-directed RNA polymerase I subunit RPA2 OS=Drosophila melanogaster GN=RpI135 PE=2 SV=2	443700	59375	54585	50279	112940	69669	96856	1.70158	0.766871	0.0408241	1.38908	0	RpI135
tr|M9PH99|M9PH99_DROME	>tr|M9PH99|M9PH99_DROME Glutamic acid decarboxylase 1, isoform D OS=Drosophila melanogaster GN=Gad1 PE=3 SV=1;>sp|P20228|DCE_DROME Glutamate decarboxylase OS=Drosophila melanogaster GN=Gad1 PE=2 SV=2	3658000	725510	809390	547620	545300	532030	498170	0.756535	-0.402521	0.0974745	1.01111	0	Gad1
tr|M9PFV9|M9PFV9_DROME	>tr|M9PFV9|M9PFV9_DROME RNA polymerase II elongation factor, isoform B OS=Drosophila melanogaster GN=TfIIS PE=4 SV=1;>sp|P20232|TFS2_DROME Transcription elongation factor S-II OS=Drosophila melanogaster GN=TfIIS PE=2 SV=1	430700	41557			133130	99139	156880	3.12141	1.6422	0.119202	0.923718	0	TfIIS
sp|P20240|OTE_DROME	>sp|P20240|OTE_DROME Otefin OS=Drosophila melanogaster GN=Ote PE=1 SV=2	387040				143580	113430	130030		10			1	Ote
tr|E1JJF9|E1JJF9_DROME	>tr|E1JJF9|E1JJF9_DROME Neuroglian, isoform D OS=Drosophila melanogaster GN=Nrg PE=1 SV=1;>sp|P20241-2|NRG_DROME Isoform A of Neuroglian OS=Drosophila melanogaster GN=Nrg;>tr|E1JJF8|E1JJF8_DROME Neuroglian, isoform E OS=Drosophila melanogaster GN=Nrg PE=1	7864100	882770	782010	646790	2639100	1412800	1500600	2.40205	1.26426	0.0543614	1.26471	0	Nrg
sp|P20351|T23O_DROME	>sp|P20351|T23O_DROME Tryptophan 2,3-dioxygenase OS=Drosophila melanogaster GN=v PE=1 SV=1	93423	30881	28663	33878					-10			-1	v
sp|P20432|GSTD1_DROME	>sp|P20432|GSTD1_DROME Glutathione S-transferase D1 OS=Drosophila melanogaster GN=GstD1 PE=1 SV=1	24959000	5395400	4021800	4007400	4083300	3571300	3880100	0.859221	-0.218899	0.262754	0.58045	0	GstD1
tr|E1JHQ1|E1JHQ1_DROME	>tr|E1JHQ1|E1JHQ1_DROME Glutamine synthetase OS=Drosophila melanogaster GN=Gs1 PE=1 SV=1;>sp|P20477|GLNA1_DROME Glutamine synthetase 1, mitochondrial OS=Drosophila melanogaster GN=Gs1 PE=2 SV=3	43108000	7650300	4299500	4931500	10656000	7872200	7698100	1.55357	0.635588	0.0909564	1.04117	0	Gs1
tr|X2JJG8|X2JJG8_DROME	>tr|X2JJG8|X2JJG8_DROME Glutamine synthetase OS=Drosophila melanogaster GN=Gs2 PE=1 SV=1;>sp|P20478|GLNA2_DROME Glutamine synthetase 2 cytoplasmic OS=Drosophila melanogaster GN=Gs2 PE=2 SV=3;>tr|X2JDA5|X2JDA5_DROME Glutamine synthetase OS=Drosophila melano	49303000	8280800	7116300	5027000	9949900	9961300	8967500	1.41395	0.499733	0.048913	1.31058	0	Gs2
sp|P21187|PABP_DROME	>sp|P21187|PABP_DROME Polyadenylate-binding protein OS=Drosophila melanogaster GN=pAbp PE=1 SV=3	34907000	4030300	4423400	3267800	8766000	6139300	8280300	1.97804	0.984072	0.0120076	1.92054	0	pAbp
tr|X2J4C1|X2J4C1_DROME	>tr|X2J4C1|X2J4C1_DROME Synaptotagmin 1, isoform I OS=Drosophila melanogaster GN=Syt1 PE=4 SV=1;>sp|P21521-4|SY65_DROME Isoform E of Synaptotagmin 1 OS=Drosophila melanogaster GN=Syt1;>sp|P21521-2|SY65_DROME Isoform B of Synaptotagmin 1 OS=Drosophila melan	72731		23469	49263					-10			-1	Syt1
sp|P21914|SDHB_DROME	>sp|P21914|SDHB_DROME Succinate dehydrogenase [ubiquinone] iron-sulfur subunit, mitochondrial OS=Drosophila melanogaster GN=SdhB PE=2 SV=2	4586700	820620	832270	374190	760520	884320	914810	1.26273	0.336544	0.32406	0.489375	0	SdhB
tr|A4V2K7|A4V2K7_DROME	>tr|A4V2K7|A4V2K7_DROME D1 chromosomal protein, isoform C OS=Drosophila melanogaster GN=D1 PE=1 SV=1;>sp|P22058|CPD1_DROME Chromosomal protein D1 OS=Drosophila melanogaster GN=D1 PE=1 SV=3	773340	51248		35262	360380	154800	171650	5.29288	2.40405	0.117643	0.929434	0	D1
tr|A0A0B4LGB7|A0A0B4LGB7_DROME	>tr|A0A0B4LGB7|A0A0B4LGB7_DROME Calcium-transporting ATPase OS=Drosophila melanogaster GN=SERCA PE=1 SV=1;>sp|P22700-2|ATC1_DROME Isoform A of Calcium-transporting ATPase sarcoplasmic/endoplasmic reticulum type OS=Drosophila melanogaster GN=Ca-P60A;>sp|P22	3818100	595940	420760	399630	756140	744460	901210	1.6958	0.761965	0.0148267	1.82896	0	SERCA
sp|P22769|PSA71_DROME	>sp|P22769|PSA71_DROME Proteasome subunit alpha type-7-1 OS=Drosophila melanogaster GN=Prosalpha4 PE=1 SV=2	17614000	3770500	4299600	3561000	2117700	1931900	1933100	0.514371	-0.959119	0.00117858	2.92864	0	Prosalpha4
sp|P22817|IDE_DROME	>sp|P22817|IDE_DROME Insulin-degrading enzyme OS=Drosophila melanogaster GN=Ide PE=1 SV=4	2102200	429460	445590	313020	245370	292520	376240	0.769424	-0.378149	0.182239	0.739359	0	Ide
sp|P22977|CH16_DROME	>sp|P22977|CH16_DROME Chorion protein S16 OS=Drosophila melanogaster GN=Cp16 PE=2 SV=2	3703900	1425400	1246300	332200	222030	254370	223660	0.23305	-2.10129	0.0859707	1.06565	0	Cp16
sp|P23128|DDX6_DROME	>sp|P23128|DDX6_DROME Putative ATP-dependent RNA helicase me31b OS=Drosophila melanogaster GN=me31B PE=1 SV=3;>sp|P23128-2|DDX6_DROME Isoform B of Putative ATP-dependent RNA helicase me31b OS=Drosophila melanogaster GN=me31B	7430200	1677100	1847600	1653300	890470	470840	890810	0.43494	-1.20111	0.00308603	2.5106	-1	me31B
sp|P23226-3|MA205_DROME	>sp|P23226-3|MA205_DROME Isoform B3 of 205 kDa microtubule-associated protein OS=Drosophila melanogaster GN=Map205;>tr|Q8IMF5|Q8IMF5_DROME Microtubule-associated protein 205, isoform B OS=Drosophila melanogaster GN=Map205 PE=1 SV=1;>sp|P23226|MA205_DROME 2	3166300	234070	89547	88249	1005300	919400	829670	6.68754	2.74148	0.00036947	3.43242	1	Map205
sp|P23572|CDK1_DROME	>sp|P23572|CDK1_DROME Cyclin-dependent kinase 1 OS=Drosophila melanogaster GN=Cdk1 PE=1 SV=1	343800	119960	125200	98646					-10			-1	Cdk1
sp|P23779|CYTL_DROME	>sp|P23779|CYTL_DROME Cystatin-like protein OS=Drosophila melanogaster GN=Cys PE=2 SV=2	52587000	1456700	1090400	1372500	5903200	30670000	12094000	12.4164	3.63417	0.115565	0.937175	0	Cys
tr|A0A023GQA5|A0A023GQA5_DROME	>tr|A0A023GQA5|A0A023GQA5_DROME Lethal (2) 37Cc, isoform D OS=Drosophila melanogaster GN=l(2)37Cc PE=1 SV=1;>sp|P24156|L2CC_DROME Protein l(2)37Cc OS=Drosophila melanogaster GN=l(2)37Cc PE=2 SV=2	1360200	430780	420850	335200		116210	57157	0.219114	-2.19025	0.00630033	2.20064	-1	l(2)37Cc
sp|P25007|PPIA_DROME	>sp|P25007|PPIA_DROME Peptidyl-prolyl cis-trans isomerase OS=Drosophila melanogaster GN=Cyp1 PE=1 SV=2	38213000	3784200	3995800	5010400	12668000	6410500	6344000	1.98762	0.991045	0.119341	0.92321	0	Cyp1
tr|M9PG62|M9PG62_DROME	>tr|M9PG62|M9PG62_DROME Regulatory particle non-ATPase 3, isoform B OS=Drosophila melanogaster GN=Rpn3 PE=1 SV=1;>sp|P25161|PSMD3_DROME Probable 26S proteasome non-ATPase regulatory subunit 3 OS=Drosophila melanogaster GN=Rpn3 PE=2 SV=1	10448000	1959200	2542600	1779900	1747700	1287500	1131100	0.663244	-0.592388	0.0754066	1.12259	0	Rpn3
sp|P25171|RCC1_DROME	>sp|P25171|RCC1_DROME Regulator of chromosome condensation OS=Drosophila melanogaster GN=Rcc1 PE=1 SV=2	36152					23895	12258		10			1	Rcc1
sp|P25823|TUD_DROME	>sp|P25823|TUD_DROME Maternal protein tudor OS=Drosophila melanogaster GN=tud PE=1 SV=2;>tr|A0A0B4LG05|A0A0B4LG05_DROME Tudor, isoform B OS=Drosophila melanogaster GN=tud PE=4 SV=1	118000	37081	23752	16342	6534.7	12576	21713	0.528976	-0.918727	0.181573	0.740948	0	tud
tr|M9NEU5|M9NEU5_DROME	>tr|M9NEU5|M9NEU5_DROME Profilin OS=Drosophila melanogaster GN=chic PE=2 SV=1;>sp|P25843|PROF_DROME Profilin OS=Drosophila melanogaster GN=chic PE=1 SV=1	35750000	5145200	4587400	3741600	8931000	6419000	6925500	1.6532	0.725258	0.0278635	1.55496	0	chic
tr|A0A0B4KHJ1|A0A0B4KHJ1_DROME	>tr|A0A0B4KHJ1|A0A0B4KHJ1_DROME Effete, isoform B OS=Drosophila melanogaster GN=eff PE=2 SV=1;>sp|P25867|UBCD1_DROME Ubiquitin-conjugating enzyme E2-17 kDa OS=Drosophila melanogaster GN=eff PE=2 SV=1	30846000	5692000	5362700	4695400	5271000	4928200	4897000	0.958483	-0.0611755	0.529127	0.27644	0	eff
tr|A0A0B4KGE6|A0A0B4KGE6_DROME	>tr|A0A0B4KGE6|A0A0B4KGE6_DROME Regulatory particle non-ATPase 8, isoform C OS=Drosophila melanogaster GN=Rpn8 PE=4 SV=1;>sp|P26270|PSMD7_DROME 26S proteasome non-ATPase regulatory subunit 7 OS=Drosophila melanogaster GN=Rpn8 PE=1 SV=6;>tr|A0A0B4KFH4|A0A0B	9255000	1590400	1660500	1138300	1313700	1688000	1864200	1.10861	0.148749	0.528467	0.276982	0	Rpn8
tr|A4V4I0|A4V4I0_DROME	>tr|A4V4I0|A4V4I0_DROME G protein beta-subunit 13F, isoform B OS=Drosophila melanogaster GN=Gbeta13F PE=1 SV=1;>sp|P26308|GBB1_DROME Guanine nucleotide-binding protein subunit beta-1 OS=Drosophila melanogaster GN=Gbeta13F PE=1 SV=1	1080000	429650	330010	320360					-10			-1	Gbeta13F
sp|P26686-3|SRR55_DROME	>sp|P26686-3|SRR55_DROME Isoform B of Serine-arginine protein 55 OS=Drosophila melanogaster GN=B52;>sp|P26686-2|SRR55_DROME Isoform A of Serine-arginine protein 55 OS=Drosophila melanogaster GN=B52;>tr|A0A0C4DHG5|A0A0C4DHG5_DROME B52, isoform O OS=Drosophi	26877000	832620	608700	1167300	8690300	7824000	7753800	9.30304	3.2177	2.97988e-05	4.5258	1	B52
sp|P28668|SYEP_DROME	>sp|P28668|SYEP_DROME Bifunctional glutamate/proline--tRNA ligase OS=Drosophila melanogaster GN=GluProRS PE=1 SV=2;>sp|P28668-2|SYEP_DROME Isoform B of Bifunctional glutamate/proline--tRNA ligase OS=Drosophila melanogaster GN=GluProRS	6774400	850430	870000	848310	1820900	1245000	1139800	1.63726	0.711285	0.0615714	1.21062	0	Aats-glupro
tr|E1JGN9|E1JGN9_DROME	>tr|E1JGN9|E1JGN9_DROME AT02443p OS=Drosophila melanogaster GN=exu PE=1 SV=1;>sp|P28750|EXU_DROME Maternal protein exuperantia OS=Drosophila melanogaster GN=exu PE=1 SV=2	84965			84965					-10			-1	exu
sp|P29310-2|1433Z_DROME	>sp|P29310-2|1433Z_DROME Isoform VI of 14-3-3 protein zeta OS=Drosophila melanogaster GN=14-3-3zeta;>tr|A0A0B4KEH0|A0A0B4KEH0_DROME 14-3-3zeta, isoform K OS=Drosophila melanogaster GN=14-3-3zeta PE=1 SV=1;>sp|P29310|1433Z_DROME 14-3-3 protein zeta OS=Dros	15815000	2239400	2394700	2195700	3908400	2449400	2627100	1.31554	0.395659	0.196133	0.707449	0	14-3-3zeta
sp|P29327|RS6_DROME	>sp|P29327|RS6_DROME 40S ribosomal protein S6 OS=Drosophila melanogaster GN=RpS6 PE=1 SV=1;>tr|Q95TP9|Q95TP9_DROME 40S ribosomal protein S6 OS=Drosophila melanogaster GN=RpS6 PE=1 SV=1	87105000	11058000	7526100	7082700	15100000	21521000	24818000	2.39371	1.25925	0.0187129	1.72786	1	RpS6
tr|Q53YH3|Q53YH3_DROME	>tr|Q53YH3|Q53YH3_DROME Calreticulin, isoform B OS=Drosophila melanogaster GN=Calr PE=1 SV=1;>sp|P29413|CALR_DROME Calreticulin OS=Drosophila melanogaster GN=Crc PE=1 SV=2	13414000	1251500	1285300	1678200	3316300	2764800	3118400	2.18256	1.12602	0.00142117	2.84735	1	Calr
sp|P29613|TPIS_DROME	>sp|P29613|TPIS_DROME Triosephosphate isomerase OS=Drosophila melanogaster GN=Tpi PE=1 SV=3;>sp|P29613-1|TPIS_DROME Isoform A of Triosephosphate isomerase OS=Drosophila melanogaster GN=Tpi	33851000	6133000	3768200	2497000	10624000	5133800	5694800	1.7303	0.791022	0.213787	0.670019	0	Tpi
tr|X2JC31|X2JC31_DROME	>tr|X2JC31|X2JC31_DROME Clathrin heavy chain OS=Drosophila melanogaster GN=Chc PE=3 SV=1;>sp|P29742|CLH_DROME Clathrin heavy chain OS=Drosophila melanogaster GN=Chc PE=1 SV=1	7220800	1761000	1262900	1307700	1124500	813210	951490	0.667005	-0.58423	0.0581824	1.23521	0	Chc
sp|P29843|HSP7A_DROME	>sp|P29843|HSP7A_DROME Heat shock 70 kDa protein cognate 1 OS=Drosophila melanogaster GN=Hsc70-1 PE=1 SV=1;>tr|Q8I0E9|Q8I0E9_DROME AT07372p OS=Drosophila melanogaster GN=Hsc70-1 PE=1 SV=1	28312000	3529600	3865300	3001300	8092100	882210	8941700	1.72332	0.785193	0.38446	0.415149	0	Hsc70-1
tr|F3YDH0|F3YDH0_DROME	>tr|F3YDH0|F3YDH0_DROME Heat shock 70-kDa protein cognate 3, isoform E OS=Drosophila melanogaster GN=Hsc70-3 PE=1 SV=1;>sp|P29844|HSP7C_DROME Heat shock 70 kDa protein cognate 3 OS=Drosophila melanogaster GN=Hsc70-3 PE=2 SV=2	38408000	2982400	2991400	3206600	11494000	8718300	9015500	3.18372	1.67071	0.0016338	2.7868	1	Hsc70-3
tr|A0A0B4LFD2|A0A0B4LFD2_DROME	>tr|A0A0B4LFD2|A0A0B4LFD2_DROME Heat shock protein cognate 5, isoform B OS=Drosophila melanogaster GN=Hsc70-5 PE=3 SV=1;>sp|P29845|HSP7E_DROME Heat shock 70 kDa protein cognate 5 OS=Drosophila melanogaster GN=Hsc70-5 PE=1 SV=2	44757000	4291500	3639600	3911700	14603000	8747800	9562800	2.77921	1.47467	0.018851	1.72467	1	Hsc70-5
sp|P30430|FUR1C_DROME	>sp|P30430|FUR1C_DROME Furin-like protease 1, isoform 1-CRR OS=Drosophila melanogaster GN=Fur1 PE=2 SV=2;>tr|A0A0B4KHV0|A0A0B4KHV0_DROME Furin 1, isoform J OS=Drosophila melanogaster GN=Fur1 PE=3 SV=1;>tr|F0JAG0|F0JAG0_DROME Furin 1, isoform G OS=Drosophil	897080	295900	310040	57331	126510	107300		0.528766	-0.919299	0.398451	0.399625	0	Fur1
tr|M9PJI4|M9PJI4_DROME	>tr|M9PJI4|M9PJI4_DROME Discs large 1, isoform T OS=Drosophila melanogaster GN=dlg1 PE=1 SV=1;>tr|E1JJH6|E1JJH6_DROME Discs large 1, isoform N OS=Drosophila melanogaster GN=dlg1 PE=1 SV=1;>sp|P31007-1|DLG1_DROME Isoform E of Disks large 1 tumor suppressor	441830	72305	47212	20746	88597	89652	123320	2.15003	1.10435	0.0455826	1.3412	1	dlg1
tr|M9PB84|M9PB84_DROME	>tr|M9PB84|M9PB84_DROME Ribosomal protein S2, isoform B OS=Drosophila melanogaster GN=RpS2 PE=3 SV=1;>sp|P31009|RS2_DROME 40S ribosomal protein S2 OS=Drosophila melanogaster GN=RpS2 PE=1 SV=2	25900000	5500500	4094100	2756500	5126100	4439100	3983200	1.09694	0.133483	0.666383	0.176276	0	RpS2
tr|E1JIJ5|E1JIJ5_DROME	>tr|E1JIJ5|E1JIJ5_DROME Vacuolar H[+]-ATPase 55kD subunit, isoform C OS=Drosophila melanogaster GN=Vha55 PE=1 SV=1;>sp|P31409|VATB_DROME V-type proton ATPase subunit B OS=Drosophila melanogaster GN=Vha55 PE=2 SV=1	71173000	7728000	7292500	7810700	16256000	16123000	15963000	2.11737	1.08227	1.24651e-06	5.90431	1	Vha55
tr|X2J5G6|X2J5G6_DROME	>tr|X2J5G6|X2J5G6_DROME Ribosomal protein L7, isoform B OS=Drosophila melanogaster GN=RpL7 PE=4 SV=1;>sp|P32100|RL7_DROME 60S ribosomal protein L7 OS=Drosophila melanogaster GN=RpL7 PE=1 SV=2	77707000	11123000	9381900	7941200	18774000	15185000	15302000	1.73173	0.792215	0.00970564	2.01298	0	RpL7
sp|P32234|128UP_DROME	>sp|P32234|128UP_DROME GTP-binding protein 128up OS=Drosophila melanogaster GN=128up PE=2 SV=2	3376100	443600	434430	402810	701390	623560	770310	1.63585	0.710039	0.00354919	2.44987	0	128up
sp|P32392|ARP3_DROME	>sp|P32392|ARP3_DROME Actin-related protein 3 OS=Drosophila melanogaster GN=Arp3 PE=2 SV=3	2322300	515440	357140	93085	406840	326240	623530	1.40485	0.490411	0.439146	0.357391	0	Arp3
tr|M9NCS8|M9NCS8_DROME	>tr|M9NCS8|M9NCS8_DROME Glutactin, isoform D OS=Drosophila melanogaster GN=Glt PE=4 SV=1;>sp|P33438|GLT_DROME Glutactin OS=Drosophila melanogaster GN=Glt PE=1 SV=2	2933800	204190	296900	336500	929160	542110	624970	2.5027	1.32349	0.0277132	1.55731	1	Glt
sp|P34082-3|FAS2_DROME	>sp|P34082-3|FAS2_DROME Isoform 3 of Fasciclin-2 OS=Drosophila melanogaster GN=Fas2;>sp|P34082-2|FAS2_DROME Isoform 2 of Fasciclin-2 OS=Drosophila melanogaster GN=Fas2;>tr|X2JCI0|X2JCI0_DROME Fasciclin 2, isoform H OS=Drosophila melanogaster GN=Fas2 PE=1 S	618010	19938	33529	33726	184880	155600	190330	6.08776	2.60591	0.000226375	3.64517	1	Fas2
tr|A0A0B4LF52|A0A0B4LF52_DROME	>tr|A0A0B4LF52|A0A0B4LF52_DROME BetaTrypsin, isoform B OS=Drosophila melanogaster GN=betaTry PE=3 SV=1;>sp|P35004|TRYB_DROME Trypsin beta OS=Drosophila melanogaster GN=betaTry PE=2 SV=2	1806200	730170	535950	540100					-10			-1	betaTry
sp|P35005|TRYE_DROME	>sp|P35005|TRYE_DROME Trypsin epsilon OS=Drosophila melanogaster GN=epsilonTry PE=2 SV=1	434620	38310	30380	89919	225370	50636		2.61025	1.38419	0.30763	0.511971	0	epsilonTry
tr|M9PE40|M9PE40_DROME	>tr|M9PE40|M9PE40_DROME Ubiquitin carboxyl-terminal hydrolase OS=Drosophila melanogaster GN=Uch PE=3 SV=1;>tr|M9MRD0|M9MRD0_DROME Ubiquitin carboxyl-terminal hydrolase OS=Drosophila melanogaster GN=Uch PE=3 SV=1;>sp|P35122|UCHL_DROME Ubiquitin carboxyl-ter	7644600	709960	682360	680590	1749400	1996900	1825400	2.68786	1.42646	9.37562e-05	4.028	1	Uch
tr|E1JJN1|E1JJN1_DROME	>tr|E1JJN1|E1JJN1_DROME Bendless, isoform B OS=Drosophila melanogaster GN=ben PE=1 SV=1;>sp|P35128|UBE2N_DROME Ubiquitin-conjugating enzyme E2 N OS=Drosophila melanogaster GN=ben PE=2 SV=1	5402500	1232700	1480200	700510	1254400	462630	272020	0.582716	-0.779134	0.278157	0.55571	0	ben
sp|P35381|ATPA_DROME	>sp|P35381|ATPA_DROME ATP synthase subunit alpha, mitochondrial OS=Drosophila melanogaster GN=blw PE=1 SV=2	128640000	16039000	16379000	12695000	32552000	24219000	26759000	1.85157	0.888751	0.00939305	2.02719	0	blw
tr|A4V1N8|A4V1N8_DROME	>tr|A4V1N8|A4V1N8_DROME FI03688p OS=Drosophila melanogaster GN=Prm PE=1 SV=1;>sp|P35415|MYSP1_DROME Paramyosin, long form OS=Drosophila melanogaster GN=Prm PE=1 SV=1	1541700	143860	150350	107150	335840	400190	404300	2.84117	1.50648	0.00068514	3.16422	1	Prm
tr|A4V1N9|A4V1N9_DROME	>tr|A4V1N9|A4V1N9_DROME Paramyosin, isoform D OS=Drosophila melanogaster GN=Prm PE=1 SV=1;>sp|P35416|MYSP2_DROME Paramyosin, short form OS=Drosophila melanogaster GN=Prm PE=2 SV=2	185560				84980	77600	22980		10			1	Prm
sp|P35421|PUR4_DROME	>sp|P35421|PUR4_DROME Phosphoribosylformylglycinamidine synthase OS=Drosophila melanogaster GN=ade2 PE=2 SV=2	13135000	1826700	1821100	1166100	2949600	2613900	2758000	1.72864	0.789637	0.00819337	2.08654	0	ade2
sp|P35600|RFC1_DROME	>sp|P35600|RFC1_DROME Replication factor C subunit 1 OS=Drosophila melanogaster GN=Gnf1 PE=1 SV=2	83099			10811	29414	15755	27119	2.22884	1.15629	0.256354	0.591159	0	Gnf1
tr|M9MQH9|M9MQH9_DROME	>tr|M9MQH9|M9MQH9_DROME Protein phosphatase 2A at 29B, isoform C OS=Drosophila melanogaster GN=Pp2A-29B PE=1 SV=1;>sp|P36179|2AAA_DROME Serine/threonine-protein phosphatase PP2A 65 kDa regulatory subunit OS=Drosophila melanogaster GN=Pp2A-29B PE=2 SV=4;>tr	312970		48367		212190	52409		2.73533	1.45171	0.652896	0.185156	0	Pp2A-29B
tr|E4NKJ3|E4NKJ3_DROME	>tr|E4NKJ3|E4NKJ3_DROME GH04081p OS=Drosophila melanogaster GN=wupA PE=1 SV=1;>sp|P36188-10|TNNI_DROME Isoform 9 of Troponin I OS=Drosophila melanogaster GN=wupA;>sp|P36188|TNNI_DROME Troponin I OS=Drosophila melanogaster GN=wupA PE=2 SV=3;>sp|P36188-6|TNN	12489000	282590	174770	340970	3912500	3962200	3815500	14.6433	3.87217	6.15203e-07	6.21098	1	wupA
tr|M9NH88|M9NH88_DROME	>tr|M9NH88|M9NH88_DROME Wings up A, isoform J OS=Drosophila melanogaster GN=wupA PE=1 SV=1;>sp|P36188-2|TNNI_DROME Isoform 1 of Troponin I OS=Drosophila melanogaster GN=wupA;>tr|M9PJQ5|M9PJQ5_DROME Wings up A, isoform K OS=Drosophila melanogaster GN=wupA P	3876700		346130	395240	1132700	908620	1094000	2.81939	1.49538	0.00510321	2.29216	1	wupA
sp|P36241|RL19_DROME	>sp|P36241|RL19_DROME 60S ribosomal protein L19 OS=Drosophila melanogaster GN=RpL19 PE=1 SV=2	147030000	6760900	7849200	6908600	67619000	28310000	29587000	5.83288	2.54421	0.0548125	1.26112	0	RpL19
sp|P36872-2|2ABA_DROME	>sp|P36872-2|2ABA_DROME Isoform B of Protein phosphatase PP2A 55 kDa regulatory subunit OS=Drosophila melanogaster GN=tws;>tr|A0A0B4LGZ3|A0A0B4LGZ3_DROME Serine/threonine-protein phosphatase 2A 55 kDa regulatory subunit B OS=Drosophila melanogaster GN=tws	3770200	729420	699710	544960	737100	440400	618640	0.909857	-0.136288	0.59713	0.223931	0	tws
sp|P36951|HYI_DROME	>sp|P36951|HYI_DROME Putative hydroxypyruvate isomerase OS=Drosophila melanogaster GN=Gip PE=2 SV=1	6299200	1749500	1718000	869920	840940	563500	557270	0.452276	-1.14473	0.0591409	1.22811	0	Gip
tr|M9MRX8|M9MRX8_DROME	>tr|M9MRX8|M9MRX8_DROME Ferredoxin 1, isoform B OS=Drosophila melanogaster GN=Fdx1 PE=4 SV=1;>sp|P37193|ADXH_DROME Adrenodoxin-like protein, mitochondrial OS=Drosophila melanogaster GN=Fdxh PE=2 SV=3	358880				147600	103460	107820		10			1	Fdx1
sp|P37276-2|DYHC_DROME	>sp|P37276-2|DYHC_DROME Isoform C of Dynein heavy chain, cytoplasmic OS=Drosophila melanogaster GN=Dhc64C;>sp|P37276|DYHC_DROME Dynein heavy chain, cytoplasmic OS=Drosophila melanogaster GN=Dhc64C PE=2 SV=2;>tr|M9PE73|M9PE73_DROME Dynein heavy chain 64C, i	805320	174630	166800	146100	107660	95308	114810	0.651812	-0.617472	0.00524066	2.28061	0	Dhc64C
tr|X2JC80|X2JC80_DROME	>tr|X2JC80|X2JC80_DROME 40S ribosomal protein SA OS=Drosophila melanogaster GN=sta PE=1 SV=1;>sp|P38979-2|RSSA_DROME Isoform A of 40S ribosomal protein SA OS=Drosophila melanogaster GN=sta;>sp|P38979|RSSA_DROME 40S ribosomal protein SA OS=Drosophila melano	45608000	5924300	4847700	4935200	8987900	10912000	10001000	1.90364	0.928763	0.00193937	2.71234	0	sta
tr|E2QD65|E2QD65_DROME	>tr|E2QD65|E2QD65_DROME Ribosomal protein S19a, isoform C OS=Drosophila melanogaster GN=RpS19a PE=1 SV=1;>sp|P39018|RS19A_DROME 40S ribosomal protein S19a OS=Drosophila melanogaster GN=RpS19a PE=1 SV=3	38528000	3838500	4188100	3824500	8949400	8257200	9469800	2.25096	1.17054	0.00018327	3.73691	1	RpS19a
sp|P39205|CIN_DROME	>sp|P39205|CIN_DROME Molybdenum cofactor synthesis protein cinnamon OS=Drosophila melanogaster GN=cin PE=1 SV=3	843370	143810	118830	112160	158450	143680	166460	1.25024	0.322205	0.0559189	1.25244	0	cin
sp|P40301|PSA2_DROME	>sp|P40301|PSA2_DROME Proteasome subunit alpha type-2 OS=Drosophila melanogaster GN=Prosalpha2 PE=1 SV=1	109960	109960							-10			-1	Prosalpha2
sp|P40304|PSB1_DROME	>sp|P40304|PSB1_DROME Proteasome subunit beta type-1 OS=Drosophila melanogaster GN=Prosbeta6 PE=2 SV=2	24532000	1646200	2815800	2162400	8353500	4790300	4763400	2.70322	1.43468	0.0386049	1.41336	1	Prosbeta6
sp|P40320-4|METK_DROME	>sp|P40320-4|METK_DROME Isoform 4 of S-adenosylmethionine synthase OS=Drosophila melanogaster GN=Sam-S;>tr|A4UZW2|A4UZW2_DROME S-adenosylmethionine synthase OS=Drosophila melanogaster GN=Sam-S PE=1 SV=1;>sp|P40320-3|METK_DROME Isoform 3 of S-adenosylmethio	9621300	1554200	950030	863560	3060100	1555000	1638500	1.85689	0.892885	0.146299	0.834757	0	Sam-S
sp|P40417|ERKA_DROME	>sp|P40417|ERKA_DROME Mitogen-activated protein kinase ERK-A OS=Drosophila melanogaster GN=rl PE=1 SV=3;>tr|A8Y4W5|A8Y4W5_DROME RE73195p OS=Drosophila melanogaster GN=rl PE=1 SV=1;>sp|P40417-1|ERKA_DROME Isoform H of Mitogen-activated protein kinase ERK-A	397080	108710	53112	62154		58110	114990	1.15928	0.213224	0.724533	0.139942	0	rl
tr|M9NFF8|M9NFF8_DROME	>tr|M9NFF8|M9NFF8_DROME Cdc42, isoform C OS=Drosophila melanogaster GN=Cdc42 PE=3 SV=1;>sp|P40793|CDC42_DROME Cdc42 homolog OS=Drosophila melanogaster GN=Cdc42 PE=1 SV=1	751120	241150	162750				347220	1.71934	0.781852	0.278339	0.555426	0	Cdc42
sp|P40796|LA_DROME	>sp|P40796|LA_DROME La protein homolog OS=Drosophila melanogaster GN=La PE=1 SV=2	18833000	1703400	2161600	1738600	4853600	4818600	3557700	2.36096	1.23938	0.00487416	2.3121	1	La
sp|P40797|PNUT_DROME	>sp|P40797|PNUT_DROME Protein peanut OS=Drosophila melanogaster GN=pnut PE=1 SV=2	472880	51138	65136	41884	176420	49009	89293	1.98992	0.992711	0.243674	0.61319	0	pnut
tr|L0MNA8|L0MNA8_DROME	>tr|L0MNA8|L0MNA8_DROME ADP ribosylation factor at 102F, isoform B OS=Drosophila melanogaster GN=Arf102F PE=3 SV=1;>sp|P40945|ARF2_DROME ADP-ribosylation factor 2 OS=Drosophila melanogaster GN=Arf102F PE=2 SV=2	2654600	220890	231740	127580	829240	666270	578930	3.57533	1.83807	0.00346089	2.46081	1	Arf102F
tr|X2JGM9|X2JGM9_DROME	>tr|X2JGM9|X2JGM9_DROME 40S ribosomal protein S4 OS=Drosophila melanogaster GN=RpS4 PE=3 SV=1;>sp|P41042|RS4_DROME 40S ribosomal protein S4 OS=Drosophila melanogaster GN=RpS4 PE=1 SV=2	104610000	15398000	17542000	17124000	21429000	17842000	15278000	1.08959	0.123779	0.475521	0.322831	0	RpS4
tr|A4UZL5|A4UZL5_DROME	>tr|A4UZL5|A4UZL5_DROME Glutathione S transferase S1, isoform C OS=Drosophila melanogaster GN=GstS1 PE=1 SV=1;>sp|P41043|GSTS1_DROME Glutathione S-transferase S1 OS=Drosophila melanogaster GN=GstS1 PE=1 SV=2;>tr|A0A0B4KFT5|A0A0B4KFT5_DROME Glutathione S tr	58286000	5225100	6623000	5823000	17156000	13318000	10141000	2.29839	1.20062	0.0208702	1.68047	1	GstS1
tr|M9NG39|M9NG39_DROME	>tr|M9NG39|M9NG39_DROME Protein on ecdysone puffs, isoform D OS=Drosophila melanogaster GN=Pep PE=1 SV=1;>sp|P41073-3|PEP_DROME Isoform C of Zinc finger protein on ecdysone puffs OS=Drosophila melanogaster GN=Pep;>sp|P41073|PEP_DROME Zinc finger protein on	4886500	305770	360380	329190	1214200	1380800	1296200	3.90942	1.96695	4.4588e-05	4.35078	1	Pep
tr|M9MRC9|M9MRC9_DROME	>tr|M9MRC9|M9MRC9_DROME GEO07462p1 OS=Drosophila melanogaster GN=RpL27A PE=2 SV=1;>sp|P41092|RL27A_DROME 60S ribosomal protein L27a OS=Drosophila melanogaster GN=RpL27A PE=1 SV=2	73026000	9453500	9823100	11281000	16640000	14142000	11687000	1.3898	0.474879	0.0608788	1.21553	0	RpL27A
sp|P41093|RL18A_DROME	>sp|P41093|RL18A_DROME 60S ribosomal protein L18a OS=Drosophila melanogaster GN=RpL18A PE=1 SV=1	215530000	27451000	34932000	20993000	51530000	39121000	41498000	1.58498	0.664461	0.0425946	1.37065	0	RpL18A
sp|P41094|RS18_DROME	>sp|P41094|RS18_DROME 40S ribosomal protein S18 OS=Drosophila melanogaster GN=RpS18 PE=1 SV=1	34993000	4541900	4694800	3547600	8402500	7335400	6470800	1.73719	0.796752	0.00911585	2.0402	0	RpS18
tr|M9PFF0|M9PFF0_DROME	>tr|M9PFF0|M9PFF0_DROME 60S ribosomal protein L13 OS=Drosophila melanogaster GN=RpL13 PE=1 SV=1;>sp|P41126|RL13_DROME 60S ribosomal protein L13 OS=Drosophila melanogaster GN=RpL13 PE=1 SV=1	102520000	9142400	6599700	7736200	33182000	23735000	22121000	3.36643	1.75122	0.00629416	2.20106	1	RpL13
tr|X2JFR6|X2JFR6_DROME	>tr|X2JFR6|X2JFR6_DROME Eukaryotic translation initiation factor 2alpha, isoform B OS=Drosophila melanogaster GN=eIF2alpha PE=4 SV=1;>sp|P41374|IF2A_DROME Eukaryotic translation initiation factor 2 subunit 1 OS=Drosophila melanogaster GN=eIF-2alpha PE=2 SV	19355000	1841600	2763700	2115900	5057200	3514200	4062700	1.87974	0.910532	0.0202313	1.69398	0	eIF-2alpha
sp|P41375|IF2B_DROME	>sp|P41375|IF2B_DROME Eukaryotic translation initiation factor 2 subunit 2 OS=Drosophila melanogaster GN=eIF-2beta PE=1 SV=1	1531400	132720	261410	254660	555650	90657	236340	1.36045	0.444085	0.615932	0.210467	0	eIF-2beta
tr|M9PIS3|M9PIS3_DROME	>tr|M9PIS3|M9PIS3_DROME 6-phosphogluconate dehydrogenase, decarboxylating OS=Drosophila melanogaster GN=Pgd PE=3 SV=1;>sp|P41572|6PGD_DROME 6-phosphogluconate dehydrogenase, decarboxylating OS=Drosophila melanogaster GN=Pgd PE=2 SV=1	7523000	2184400	2019500	772550	862410	852040	832190	0.511738	-0.966522	0.143387	0.843491	0	Pgd
sp|P42207|SEPT1_DROME	>sp|P42207|SEPT1_DROME Septin-1 OS=Drosophila melanogaster GN=Sep1 PE=1 SV=1	957960	93317	103780	64689	129170	353480	213520	2.65931	1.41105	0.094843	1.02299	0	2019-09-01
sp|P42279|TRYU_DROME	>sp|P42279|TRYU_DROME Trypsin eta OS=Drosophila melanogaster GN=etaTry PE=2 SV=2	191020			120760			70261	0.581823	-0.781347			0	etaTry
sp|P42281|ACBP_DROME	>sp|P42281|ACBP_DROME Acyl-CoA-binding protein homolog OS=Drosophila melanogaster GN=Dbi PE=2 SV=1	15078000	2210500	1740100	1510300	1702000	2811000	5104100	1.76108	0.816463	0.246994	0.607313	0	Dbi
tr|Q6AWJ5|Q6AWJ5_DROME	>tr|Q6AWJ5|Q6AWJ5_DROME LP12324p OS=Drosophila melanogaster GN=svr PE=1 SV=1;>sp|P42787-6|CBPD_DROME Isoform 6 of Carboxypeptidase D OS=Drosophila melanogaster GN=svr;>tr|D3DME3|D3DME3_DROME LP15968p OS=Drosophila melanogaster GN=svr PE=1 SV=1;>sp|P42787-7	603160				178730	220190	204250		10			1	svr
sp|P45437|COPB_DROME	>sp|P45437|COPB_DROME Coatomer subunit beta OS=Drosophila melanogaster GN=betaCOP PE=2 SV=2	1969400	539410	459500	449960	98116	172810	249610	0.35927	-1.47686	0.0040365	2.39399	-1	betaCOP
sp|P45594|CADF_DROME	>sp|P45594|CADF_DROME Cofilin/actin-depolymerizing factor homolog OS=Drosophila melanogaster GN=tsr PE=1 SV=1	117830000	19831000	16965000	12481000	32468000	18290000	17792000	1.39112	0.476242	0.289418	0.538474	0	tsr
tr|E1JH67|E1JH67_DROME	>tr|E1JH67|E1JH67_DROME Attacin-B, isoform B OS=Drosophila melanogaster GN=AttB PE=4 SV=1;>sp|Q9V751|ATTB_DROME Attacin-B OS=Drosophila melanogaster GN=AttB PE=3 SV=2;>sp|P45884|ATTA_DROME Attacin-A OS=Drosophila melanogaster GN=AttA PE=3 SV=1	2143600		43784		879240	697640	522960	15.9864	3.99877	0.0858227	1.0664	0	AttB
sp|P45888-2|ARP2_DROME	>sp|P45888-2|ARP2_DROME Isoform A of Actin-related protein 2 OS=Drosophila melanogaster GN=Arp2;>sp|P45888|ARP2_DROME Actin-related protein 2 OS=Drosophila melanogaster GN=Arp2 PE=2 SV=3	2128000	254870	200400	362590	501690	427600	380890	1.60196	0.679839	0.0502881	1.29853	0	Arp2
sp|P45889|ACTZ_DROME	>sp|P45889|ACTZ_DROME Actin-related protein 1 OS=Drosophila melanogaster GN=Arp1 PE=2 SV=2	2332500	525620	446020	327260	492050	301860	239700	0.795758	-0.329598	0.406009	0.391464	0	Arp1
sp|P46150-5|MOEH_DROME	>sp|P46150-5|MOEH_DROME Isoform C of Moesin/ezrin/radixin homolog 1 OS=Drosophila melanogaster GN=Moe;>sp|P46150-2|MOEH_DROME Isoform D of Moesin/ezrin/radixin homolog 1 OS=Drosophila melanogaster GN=Moe;>tr|M9NG50|M9NG50_DROME Moesin, isoform L OS=Drosoph	66081000	7818700	7509300	6745300	15183000	14950000	13874000	1.99368	0.995431	0.000141957	3.84784	0	Moe
tr|A0A0B4LGZ5|A0A0B4LGZ5_DROME	>tr|A0A0B4LGZ5|A0A0B4LGZ5_DROME Ribosomal protein L11, isoform B OS=Drosophila melanogaster GN=RpL11 PE=1 SV=1;>sp|P46222|RL11_DROME 60S ribosomal protein L11 OS=Drosophila melanogaster GN=RpL11 PE=1 SV=2	106590000	19236000	16286000	15503000	23460000	16834000	15269000	1.08894	0.12292	0.612268	0.213058	0	RpL11
tr|X2JCS6|X2JCS6_DROME	>tr|X2JCS6|X2JCS6_DROME Ribosomal protein L7A, isoform E OS=Drosophila melanogaster GN=RpL7A PE=4 SV=1;>sp|P46223|RL7A_DROME 60S ribosomal protein L7a OS=Drosophila melanogaster GN=RpL7A PE=1 SV=2	86788000	6481900	4798600	2980600	27097000	21914000	23517000	5.08572	2.34645	0.000451438	3.3454	1	RpL7A
sp|P46415|ADHX_DROME	>sp|P46415|ADHX_DROME Alcohol dehydrogenase class-3 OS=Drosophila melanogaster GN=Fdh PE=1 SV=3	20355000	3711100	3707900	4513200	2027400	4131500	2264300	0.705922	-0.50242	0.178304	0.748838	0	Fdh
tr|M9PH10|M9PH10_DROME	>tr|M9PH10|M9PH10_DROME Comatose, isoform B OS=Drosophila melanogaster GN=comt PE=1 SV=1;>sp|P46461|NSF1_DROME Vesicle-fusing ATPase 1 OS=Drosophila melanogaster GN=comt PE=2 SV=1	423530	112340	129580	103390		54239	23976	0.33976	-1.55741	0.0149041	1.82669	-1	comt
tr|M9PFG7|M9PFG7_DROME	>tr|M9PFG7|M9PFG7_DROME Kinesin light chain, isoform C OS=Drosophila melanogaster GN=Klc PE=4 SV=1;>tr|M9PF24|M9PF24_DROME Kinesin light chain, isoform B OS=Drosophila melanogaster GN=Klc PE=4 SV=1;>sp|P46824|KLC_DROME Kinesin light chain OS=Drosophila mel	167910	25796	19334	15696	25358	53617	28111	1.76053	0.81601	0.178734	0.747793	0	Klc
tr|X2JDR5|X2JDR5_DROME	>tr|X2JDR5|X2JDR5_DROME Thioredoxin OS=Drosophila melanogaster GN=dhd PE=2 SV=1;>sp|P47938|THIO1_DROME Thioredoxin-1 OS=Drosophila melanogaster GN=dhd PE=1 SV=1	6714700	2405000	2736900	1527700		45109		0.0202901	-5.62308	0.094422	1.02493	0	dhd
sp|P48148|RHO1_DROME	>sp|P48148|RHO1_DROME Ras-like GTP-binding protein Rho1 OS=Drosophila melanogaster GN=Rho1 PE=1 SV=1	23353000	2016100	1609100	1439200	5064100	5812200	7412600	3.61127	1.85251	0.00348683	2.45757	1	Rho1
tr|E1JJM9|E1JJM9_DROME	>tr|E1JJM9|E1JJM9_DROME GEO07866p1 OS=Drosophila melanogaster GN=RpS15Aa PE=1 SV=1;>sp|P48149|RS15A_DROME 40S ribosomal protein S15Aa OS=Drosophila melanogaster GN=RpS15Aa PE=1 SV=2;>sp|Q7KR04|RS15B_DROME 40S ribosomal protein S15Ab OS=Drosophila melanogas	14391000	4290000	4457900	2846300	927300	882270	987340	0.241234	-2.0515	0.00461467	2.33586	-1	RpS15Aa
sp|P48159|RL23_DROME	>sp|P48159|RL23_DROME 60S ribosomal protein L23 OS=Drosophila melanogaster GN=RpL23 PE=1 SV=2	30485000	4790700	4416000	1501700	6058200	7678700	6039500	1.84681	0.885037	0.0615227	1.21096	0	RpL23
sp|P48375|FKB12_DROME	>sp|P48375|FKB12_DROME 12 kDa FK506-binding protein OS=Drosophila melanogaster GN=FK506-bp2 PE=3 SV=2	122600000	19725000	11309000	9454200	38965000	18031000	25111000	2.02792	1.02	0.115195	0.938565	0	FK506-bp2
tr|A0A0B4KHS9|A0A0B4KHS9_DROME	>tr|A0A0B4KHS9|A0A0B4KHS9_DROME Serine/threonine-protein phosphatase OS=Drosophila melanogaster GN=Pp1alpha-96A PE=3 SV=1;>sp|P48461|PP11_DROME Serine/threonine-protein phosphatase alpha-1 isoform OS=Drosophila melanogaster GN=Pp1alpha-96A PE=1 SV=1	576250	174380		174740	227120			1.3011	0.379732	0.00377618	2.42295	0	Pp1alpha-96A
tr|H5V895|H5V895_DROME	>tr|H5V895|H5V895_DROME Serine/threonine-protein phosphatase OS=Drosophila melanogaster GN=flw PE=1 SV=1;>sp|P48462|PP1B_DROME Serine/threonine-protein phosphatase beta isoform OS=Drosophila melanogaster GN=flw PE=1 SV=1;>tr|Q8T0U6|Q8T0U6_DROME Serine/thre	374840				200780		174060		10			1	flw
tr|M9PBU2|M9PBU2_DROME	>tr|M9PBU2|M9PBU2_DROME Rac2, isoform B OS=Drosophila melanogaster GN=Rac2 PE=3 SV=1;>sp|P48554|RAC2_DROME Ras-related protein Rac2 OS=Drosophila melanogaster GN=Rac2 PE=1 SV=1;>tr|M9PBH7|M9PBH7_DROME Rac1, isoform B OS=Drosophila melanogaster GN=Rac1 PE=3	2376400	446370	370290	378620	503410	334850	342900	0.988187	-0.0171442	0.941191	0.026322	0	Rac2
sp|P48588|RS25_DROME	>sp|P48588|RS25_DROME 40S ribosomal protein S25 OS=Drosophila melanogaster GN=RpS25 PE=1 SV=3	21706000		969820	1689500	4690900	6548000	7807300	4.7747	2.25541	0.0248445	1.60477	1	RpS25
sp|P48591|RIR1_DROME	>sp|P48591|RIR1_DROME Ribonucleoside-diphosphate reductase large subunit OS=Drosophila melanogaster GN=RnrL PE=1 SV=2	2281000	359830	428930	494210	489260	259580	249210	0.777922	-0.362303	0.338417	0.470548	0	RnrL
sp|P48592|RIR2_DROME	>sp|P48592|RIR2_DROME Ribonucleoside-diphosphate reductase subunit M2 OS=Drosophila melanogaster GN=RnrS PE=1 SV=2	105750	50221	55528						-10			-1	RnrS
sp|P48596-2|GCH1_DROME	>sp|P48596-2|GCH1_DROME Isoform B of GTP cyclohydrolase 1 OS=Drosophila melanogaster GN=Pu;>sp|P48596-3|GCH1_DROME Isoform C of GTP cyclohydrolase 1 OS=Drosophila melanogaster GN=Pu;>sp|P48596|GCH1_DROME GTP cyclohydrolase 1 OS=Drosophila melanogaster GN=P	892020	58217	48873	156300	312340	166090	150200	2.38669	1.25501	0.121021	0.91714	0	Pu
sp|P48598-2|IF4E_DROME	>sp|P48598-2|IF4E_DROME Isoform II of Eukaryotic translation initiation factor 4E OS=Drosophila melanogaster GN=eIF-4E;>tr|M9PBZ9|M9PBZ9_DROME Eukaryotic initiation factor 4E, isoform H OS=Drosophila melanogaster GN=eIF4E1 PE=1 SV=1;>sp|P48598|IF4E_DROME E	6889500	952800	893680	731630	1327000	1461000	1523500	1.67235	0.741876	0.00277468	2.55679	0	eIF-4E
tr|A0A0B4LIJ0|A0A0B4LIJ0_DROME	>tr|A0A0B4LIJ0|A0A0B4LIJ0_DROME Regulatory particle triple-A ATPase 2, isoform B OS=Drosophila melanogaster GN=Rpt2 PE=3 SV=1;>sp|P48601|PRS4_DROME 26S protease regulatory subunit 4 OS=Drosophila melanogaster GN=Rpt2 PE=1 SV=2	10104000	1710200	1726600	1448600	1078800	2023400	2116100	1.06814	0.0951032	0.762787	0.117596	0	Rpt2
tr|M9PD18|M9PD18_DROME	>tr|M9PD18|M9PD18_DROME Vacuolar H[+] ATPase 68kD subunit 1, isoform B OS=Drosophila melanogaster GN=Vha68-1 PE=1 SV=1;>sp|P48602|VATA1_DROME V-type proton ATPase catalytic subunit A isoform 1 OS=Drosophila melanogaster GN=Vha68-1 PE=2 SV=2	2458900	160630	22468	342160	718750	556300	658640	3.68141	1.88026	0.0107088	1.97026	1	Vha68-1
tr|M9PBN7|M9PBN7_DROME	>tr|M9PBN7|M9PBN7_DROME Capping protein beta, isoform B OS=Drosophila melanogaster GN=cpb PE=4 SV=1;>sp|P48603|CAPZB_DROME F-actin-capping protein subunit beta OS=Drosophila melanogaster GN=cpb PE=2 SV=1	7685200	1223200	1181800	1196100	1623500	1333200	1127400	1.13413	0.181581	0.327375	0.484954	0	cpb
tr|A4V303|A4V303_DROME	>tr|A4V303|A4V303_DROME T-complex protein 1 subunit gamma OS=Drosophila melanogaster GN=CCT3 PE=1 SV=1;>sp|P48605|TCPG_DROME T-complex protein 1 subunit gamma OS=Drosophila melanogaster GN=Cctgamma PE=2 SV=2	12247000	2100400	1756000	1474000	2469500	2170300	2276500	1.29752	0.375757	0.0583331	1.23408	0	Cctgamma
sp|P48609|CDK5_DROME	>sp|P48609|CDK5_DROME Cyclin-dependent kinase 5 homolog OS=Drosophila melanogaster GN=Cdk5 PE=1 SV=2	1008400	93701	107490	88862	236860	318640	162890	2.47675	1.30845	0.0345098	1.46206	1	Cdk5
tr|A8JNP1|A8JNP1_DROME	>tr|A8JNP1|A8JNP1_DROME Arginine kinase, isoform G OS=Drosophila melanogaster GN=Argk PE=1 SV=2;>sp|P48610|KARG_DROME Arginine kinase OS=Drosophila melanogaster GN=Argk PE=2 SV=2;>tr|A8JNP2|A8JNP2_DROME Arginine kinase, isoform E OS=Drosophila melanogaster	149190000	16680000	16955000	12621000	40979000	28122000	33837000	2.2254	1.15406	0.008944	2.04847	1	Argk
sp|P48612|PELO_DROME	>sp|P48612|PELO_DROME Protein pelota OS=Drosophila melanogaster GN=pelo PE=2 SV=2	168610	84350	45769	38487					-10			-1	pelo
tr|E1JHA4|E1JHA4_DROME	>tr|E1JHA4|E1JHA4_DROME Heterogeneous nuclear ribonucleoprotein at 27C, isoform D OS=Drosophila melanogaster GN=Hrb27C PE=1 SV=1;>sp|P48809|RB27C_DROME Heterogeneous nuclear ribonucleoprotein 27C OS=Drosophila melanogaster GN=Hrb27C PE=1 SV=2	11571000	863110	665200	580420	3922100	2667500	2872900	4.4873	2.16585	0.00350891	2.45483	1	Hrb27C
sp|P48810-2|RB87F_DROME	>sp|P48810-2|RB87F_DROME Isoform B of Heterogeneous nuclear ribonucleoprotein 87F OS=Drosophila melanogaster GN=Hrb87F;>tr|E1JIK0|E1JIK0_DROME Heterogeneous nuclear ribonucleoprotein at 87F, isoform C OS=Drosophila melanogaster GN=Hrb87F PE=1 SV=1;>sp|P488	18306000	1536800	1038800	2952900	5541800	3908400	3327500	2.31124	1.20867	0.0509981	1.29245	0	Hrb87F
sp|P49028|MGN_DROME	>sp|P49028|MGN_DROME Protein mago nashi OS=Drosophila melanogaster GN=mago PE=1 SV=1	1694300	361910	414840	373380		290970	253230	0.709746	-0.494626	0.0212625	1.67239	0	mago
tr|X2JC35|X2JC35_DROME	>tr|X2JC35|X2JC35_DROME 60S ribosomal protein L36 OS=Drosophila melanogaster GN=RpL36 PE=2 SV=1;>sp|P49630|RL36_DROME 60S ribosomal protein L36 OS=Drosophila melanogaster GN=RpL36 PE=1 SV=1	240530000	8296800	12541000	7290200	86317000	58708000	67373000	7.55112	2.91669	0.00178596	2.74813	1	RpL36
sp|P49735|MCM2_DROME	>sp|P49735|MCM2_DROME DNA replication licensing factor Mcm2 OS=Drosophila melanogaster GN=Mcm2 PE=1 SV=1	497960	109890	83787	106450	45959	81311	70564	0.659168	-0.601283	0.0622171	1.20609	0	Mcm2
tr|A8JRF7|A8JRF7_DROME	>tr|A8JRF7|A8JRF7_DROME Darkener of apricot, isoform AA OS=Drosophila melanogaster GN=Doa PE=1 SV=2;>tr|B7Z0R6|B7Z0R6_DROME Darkener of apricot, isoform V OS=Drosophila melanogaster GN=Doa PE=1 SV=1;>sp|P49762-3|DOA_DROME Isoform B of Serine/threonine-prot	136060		34833			58055	43175	1.45308	0.53911	0.435918	0.360595	0	Doa
sp|P49963|SRP19_DROME	>sp|P49963|SRP19_DROME Signal recognition particle 19 kDa protein OS=Drosophila melanogaster GN=Srp19 PE=2 SV=2	1494400	343440	406610	90958	113470	223480	316470	0.776949	-0.364109	0.609107	0.215306	0	Srp19
tr|X2JDU0|X2JDU0_DROME	>tr|X2JDU0|X2JDU0_DROME Ribosomal protein L9, isoform C OS=Drosophila melanogaster GN=RpL9 PE=4 SV=1;>sp|P50882|RL9_DROME 60S ribosomal protein L9 OS=Drosophila melanogaster GN=RpL9 PE=1 SV=2	69962000	16921000	13179000	10659000	12641000	9573800	6987800	0.71647	-0.481022	0.190286	0.720594	0	RpL9
sp|P50887|RL22_DROME	>sp|P50887|RL22_DROME 60S ribosomal protein L22 OS=Drosophila melanogaster GN=RpL22 PE=1 SV=2	45663000	5724300	5439800	5157400	12528000	7953100	8860400	1.79772	0.846169	0.0368489	1.43358	0	RpL22
sp|P51592|HYD_DROME	>sp|P51592|HYD_DROME E3 ubiquitin-protein ligase hyd OS=Drosophila melanogaster GN=hyd PE=1 SV=3;>tr|A0A0B4LGZ6|A0A0B4LGZ6_DROME Hyperplastic discs, isoform B OS=Drosophila melanogaster GN=hyd PE=1 SV=1	37210	4749.7		3396.7	5039.5	9831	14194	2.37851	1.25006	0.202103	0.694426	0	hyd
sp|P52029|G6PI_DROME	>sp|P52029|G6PI_DROME Glucose-6-phosphate isomerase OS=Drosophila melanogaster GN=Pgi PE=2 SV=2	35597000	4908000	4891900	4284300	6857200	6983800	7671800	1.52744	0.611118	0.0016092	2.79339	0	Pgi
sp|P52034-3|PFKA_DROME	>sp|P52034-3|PFKA_DROME Isoform C of ATP-dependent 6-phosphofructokinase OS=Drosophila melanogaster GN=Pfk;>sp|P52034|PFKA_DROME ATP-dependent 6-phosphofructokinase OS=Drosophila melanogaster GN=Pfk PE=2 SV=2;>tr|A0A0B4K7L1|A0A0B4K7L1_DROME ATP-dependent 6	16437000	2923800	2690100	2013500	3847800	2595400	2366100	1.15495	0.207836	0.502564	0.298809	0	Pfk
sp|P52295|IMA_DROME	>sp|P52295|IMA_DROME Importin subunit alpha OS=Drosophila melanogaster GN=Pen PE=1 SV=2	415690	79312	113710	95922	90139	36611		0.657999	-0.603842	0.258973	0.586746	0	Pen
sp|P52304|POLO_DROME	>sp|P52304|POLO_DROME Serine/threonine-protein kinase polo OS=Drosophila melanogaster GN=polo PE=1 SV=2	651580	266980	267540	117060					-10			-1	polo
tr|X2JAX3|X2JAX3_DROME	>tr|X2JAX3|X2JAX3_DROME Ubiquitin conjugating enzyme 4, isoform B OS=Drosophila melanogaster GN=Ubc4 PE=1 SV=1;>sp|P52486|UBCD4_DROME Ubiquitin-conjugating enzyme E2-22 kDa OS=Drosophila melanogaster GN=Ubc4 PE=1 SV=2	2833600	558170	452740	475700	331460	525680	489860	0.906088	-0.142276	0.52971	0.275962	0	Ubc4
sp|P52905|TRYI_DROME	>sp|P52905|TRYI_DROME Trypsin iota OS=Drosophila melanogaster GN=iotaTry PE=2 SV=1	825650	273080	242990	200430		109160		0.457055	-1.12956	0.0914013	1.03905	0	iotaTry
sp|P53501|ACT3_DROME	>sp|P53501|ACT3_DROME Actin-57B OS=Drosophila melanogaster GN=Act57B PE=1 SV=1	4235600	938120	718650	539840	904110	539210	595690	0.928253	-0.10741	0.761452	0.118357	0	Act57B
tr|A0A0B4LGF8|A0A0B4LGF8_DROME	>tr|A0A0B4LGF8|A0A0B4LGF8_DROME Muscle LIM protein at 60A, isoform F OS=Drosophila melanogaster GN=Mlp60A PE=1 SV=1;>sp|P53777|MLP1_DROME Muscle LIM protein 1 OS=Drosophila melanogaster GN=Mlp60A PE=2 SV=1;>tr|B7YZP9|B7YZP9_DROME Muscle LIM protein at 60A,	96665000	13574000	16350000	9237800	27045000	14144000	16315000	1.46837	0.554215	0.245207	0.610468	0	Mlp60A
tr|A0A0B4LH53|A0A0B4LH53_DROME	>tr|A0A0B4LH53|A0A0B4LH53_DROME N-ethylmaleimide-sensitive factor 2, isoform B OS=Drosophila melanogaster GN=Nsf2 PE=4 SV=1;>sp|P54351|NSF2_DROME Vesicle-fusing ATPase 2 OS=Drosophila melanogaster GN=Nsf2 PE=2 SV=2	449000	21417		42541	131610	90568	162870	4.01355	2.00488	0.0417396	1.37945	1	Nsf2
sp|P54352-2|EAS_DROME	>sp|P54352-2|EAS_DROME Isoform A of Ethanolamine kinase OS=Drosophila melanogaster GN=eas;>sp|P54352|EAS_DROME Ethanolamine kinase OS=Drosophila melanogaster GN=eas PE=1 SV=2	641830	104970	49783	48918	159090	141200	137870	2.15131	1.10522	0.016508	1.7823	1	eas
sp|P54353|DOD_DROME	>sp|P54353|DOD_DROME Putative peptidyl-prolyl cis-trans isomerase dodo OS=Drosophila melanogaster GN=dod PE=2 SV=3	467260		166910	146480	153870			0.981971	-0.0262472	0.899203	0.0461424	0	dod
sp|P54358|DPOD1_DROME	>sp|P54358|DPOD1_DROME DNA polymerase delta catalytic subunit OS=Drosophila melanogaster GN=DNApol-delta PE=2 SV=2	43931	13536	12381	18014					-10			-1	DNApol-delta
sp|P54359|SEPT2_DROME	>sp|P54359|SEPT2_DROME Septin-2 OS=Drosophila melanogaster GN=Sep2 PE=2 SV=2;>tr|A0A0B4KGJ1|A0A0B4KGJ1_DROME Septin 2, isoform B OS=Drosophila melanogaster GN=Sep2 PE=3 SV=1	2426600	192600	154460	185150	649700	507370	737290	3.55942	1.83164	0.00261576	2.5824	1	2019-09-02
tr|E1JJI5|E1JJI5_DROME	>tr|E1JJI5|E1JJI5_DROME Casein kinase ialpha, isoform D OS=Drosophila melanogaster GN=CkIalpha PE=1 SV=1;>sp|P54367|KC1A_DROME Casein kinase I isoform alpha OS=Drosophila melanogaster GN=CkIalpha PE=1 SV=1	430720		70533	263710	37044	30135	29301	0.192435	-2.37756	0.157809	0.801868	0	CkIalpha
sp|P54385|DHE3_DROME	>sp|P54385|DHE3_DROME Glutamate dehydrogenase, mitochondrial OS=Drosophila melanogaster GN=Gdh PE=1 SV=2;>sp|P54385-2|DHE3_DROME Isoform C of Glutamate dehydrogenase, mitochondrial OS=Drosophila melanogaster GN=Gdh;>tr|Q8IMY1|Q8IMY1_DROME Glutamate dehydro	50089000	6786400	6349400	4525100	13083000	8515800	10829000	1.83614	0.876672	0.0297893	1.52594	0	Gdh
sp|P54397|FKB39_DROME	>sp|P54397|FKB39_DROME 39 kDa FK506-binding nuclear protein OS=Drosophila melanogaster GN=FK506-bp1 PE=1 SV=2	9600800	2262500	1927700	1080100	976680	1469400	1884400	0.821676	-0.283358	0.514814	0.28835	0	FK506-bp1
sp|P54398|FBP2_DROME	>sp|P54398|FBP2_DROME Fat body protein 2 OS=Drosophila melanogaster GN=Fbp2 PE=2 SV=2;>tr|X2J986|X2J986_DROME Fat body protein 2, isoform B OS=Drosophila melanogaster GN=Fbp2 PE=3 SV=1	1802800	664290	604160	534310					-10			-1	Fbp2
tr|X2JGP4|X2JGP4_DROME	>tr|X2JGP4|X2JGP4_DROME Protein disulfide-isomerase OS=Drosophila melanogaster GN=Pdi PE=3 SV=1;>sp|P54399|PDI_DROME Protein disulfide-isomerase OS=Drosophila melanogaster GN=Pdi PE=2 SV=1;>sp|P54399-2|PDI_DROME Isoform D of Protein disulfide-isomerase OS=	20583000	2658800	2713800	2112100	5806400	3817500	3474700	1.75005	0.807396	0.0675531	1.17035	0	Pdi
tr|A0A0B4LGS4|A0A0B4LGS4_DROME	>tr|A0A0B4LGS4|A0A0B4LGS4_DROME Vacuolar H[+]-ATPase 26kD subunit, isoform C OS=Drosophila melanogaster GN=Vha26 PE=3 SV=1;>sp|P54611|VATE_DROME V-type proton ATPase subunit E OS=Drosophila melanogaster GN=Vha26 PE=2 SV=1	28305000	3628700	5278000	3137800	6836500	4390000	5033800	1.35002	0.432979	0.223831	0.65008	0	Vha26
sp|P54622|SSBP_DROME	>sp|P54622|SSBP_DROME Single-stranded DNA-binding protein, mitochondrial OS=Drosophila melanogaster GN=mtSSB PE=1 SV=2	5181900		561640	663760	1307300	1200600	1448600	2.15249	1.10601	0.00587716	2.23083	1	mtSSB
tr|M9PIG8|M9PIG8_DROME	>tr|M9PIG8|M9PIG8_DROME Regulatory particle non-ATPase 10, isoform B OS=Drosophila melanogaster GN=Rpn10 PE=4 SV=1;>sp|P55035|PSMD4_DROME 26S proteasome non-ATPase regulatory subunit 4 OS=Drosophila melanogaster GN=Rpn10 PE=1 SV=2	5508400	1517400	1084100	726650	786210	704350	689630	0.655076	-0.610267	0.172355	0.763575	0	Rpn10
sp|P55162|HEM_DROME	>sp|P55162|HEM_DROME Membrane-associated protein Hem OS=Drosophila melanogaster GN=Hem PE=2 SV=1	36406	8876.8	11453	16076					-10			-1	Hem
sp|P55824-3|FAF_DROME	>sp|P55824-3|FAF_DROME Isoform 3 of Probable ubiquitin carboxyl-terminal hydrolase FAF OS=Drosophila melanogaster GN=faf;>tr|A0A0B4K6W2|A0A0B4K6W2_DROME Fat facets, isoform E OS=Drosophila melanogaster GN=faf PE=3 SV=1;>tr|A0A0B4K7S0|A0A0B4K7S0_DROME Fat f	139670	40820	36075	38909		14906	8960	0.309134	-1.69369	0.00256375	2.59112	-1	faf
sp|P55828|RS20_DROME	>sp|P55828|RS20_DROME 40S ribosomal protein S20 OS=Drosophila melanogaster GN=RpS20 PE=1 SV=1	95521000	9190300	7996100	8215600	34761000	16965000	18393000	2.76037	1.46486	0.0596971	1.22405	0	RpS20
sp|P55830|RS3A_DROME	>sp|P55830|RS3A_DROME 40S ribosomal protein S3a OS=Drosophila melanogaster GN=RpS3A PE=1 SV=4	93544000	14689000	10290000	9356900	22903000	16576000	19730000	1.72441	0.786099	0.027943	1.55373	0	RpS3A
sp|P55841|RL14_DROME	>sp|P55841|RL14_DROME 60S ribosomal protein L14 OS=Drosophila melanogaster GN=RpL14 PE=1 SV=1	65531000	9944800	11472000	12382000	13047000	8874200	9811300	0.938865	-0.0910108	0.659617	0.180708	0	RpL14
tr|C6SUW3|C6SUW3_DROME	>tr|C6SUW3|C6SUW3_DROME LD13662p OS=Drosophila melanogaster GN=RpS9 PE=1 SV=1;>sp|P55935|RS9_DROME 40S ribosomal protein S9 OS=Drosophila melanogaster GN=RpS9 PE=1 SV=2;>tr|Q95RG1|Q95RG1_DROME GEO04282p1 OS=Drosophila melanogaster GN=RpS9 PE=1 SV=1	105690000	15849000	13076000	11491000	25564000	17845000	21862000	1.61498	0.691516	0.0320543	1.49411	0	RpS9
sp|P56538|IF6_DROME	>sp|P56538|IF6_DROME Eukaryotic translation initiation factor 6 OS=Drosophila melanogaster GN=eIF6 PE=2 SV=3	759820	397210	214060	98155		50392		0.213097	-2.23042	0.397074	0.401129	0	eIF6
tr|M9PG22|M9PG22_DROME	>tr|M9PG22|M9PG22_DROME ADP ribosylation factor at 79F, isoform J OS=Drosophila melanogaster GN=Arf79F PE=3 SV=1;>sp|P61209|ARF1_DROME ADP-ribosylation factor 1 OS=Drosophila melanogaster GN=Arf79F PE=2 SV=2	16163000	3440600	3915300	2967800	2089000	1728900	2021800	0.56566	-0.821994	0.00714841	2.14579	0	Arf79F
sp|P61851|SODC_DROME	>sp|P61851|SODC_DROME Superoxide dismutase [Cu-Zn] OS=Drosophila melanogaster GN=Sod PE=1 SV=2;>tr|M9PF91|M9PF91_DROME Superoxide dismutase [Cu-Zn] OS=Drosophila melanogaster GN=Sod1 PE=3 SV=1	114810000	11758000	12141000	18852000	25651000	23086000	23326000	1.68564	0.753301	0.0161682	1.79134	0	Sod
tr|A0A0B4LF57|A0A0B4LF57_DROME	>tr|A0A0B4LF57|A0A0B4LF57_DROME Calmodulin, isoform C OS=Drosophila melanogaster GN=Cam PE=1 SV=1;>sp|P62152|CALM_DROME Calmodulin OS=Drosophila melanogaster GN=Cam PE=1 SV=2	598600					138510	460090		10			1	Cam
sp|P80455|RS12_DROME	>sp|P80455|RS12_DROME 40S ribosomal protein S12 OS=Drosophila melanogaster GN=RpS12 PE=1 SV=2	4638200	1523700	504080	591280	859020	674130	486030	0.770956	-0.37528	0.591838	0.227797	0	RpS12
sp|P81900|KAPR2_DROME	>sp|P81900|KAPR2_DROME cAMP-dependent protein kinase type II regulatory subunit OS=Drosophila melanogaster GN=Pka-R2 PE=1 SV=2;>sp|P81900-5|KAPR2_DROME Isoform D of cAMP-dependent protein kinase type II regulatory subunit OS=Drosophila melanogaster GN=Pka-	7812300	806470	1192100	571370	2966200	911250	1364900	2.03987	1.02848	0.241825	0.6165	0	Pka-R2
tr|A0A0B4KEY5|A0A0B4KEY5_DROME	>tr|A0A0B4KEY5|A0A0B4KEY5_DROME Lethal (2) essential for life, isoform C OS=Drosophila melanogaster GN=l(2)efl PE=3 SV=1;>sp|P82147|L2EFL_DROME Protein lethal(2)essential for life OS=Drosophila melanogaster GN=l(2)efl PE=1 SV=1;>sp|P82147-2|L2EFL_DROME Iso	4338700	281970	244230	225270	1201800	981910	1403500	4.77359	2.25507	0.00153612	2.81357	1	l(2)efl
sp|P82804|PYM_DROME	>sp|P82804|PYM_DROME Partner of Y14 and mago OS=Drosophila melanogaster GN=Pym PE=1 SV=1	164170	70526	72683		20957			0.292677	-1.77262	0.0234696	1.62949	-1	Pym
sp|P82890|PPAC1_DROME	>sp|P82890|PPAC1_DROME Low molecular weight phosphotyrosine protein phosphatase 1 OS=Drosophila melanogaster GN=primo-1 PE=2 SV=1	9148500	1779700	1875400	952070	2411300	357620	1772500	0.985729	-0.0207374	0.975613	0.0107223	0	primo-1
sp|P83967|ACT6_DROME	>sp|P83967|ACT6_DROME Actin, indirect flight muscle OS=Drosophila melanogaster GN=Act88F PE=1 SV=1;>tr|A0A0B4LH50|A0A0B4LH50_DROME Actin 87E, isoform C OS=Drosophila melanogaster GN=Act87E PE=3 SV=1;>sp|P10981|ACT5_DROME Actin-87E OS=Drosophila melanogaste	213210000	33231000	30686000	23207000	49428000	37892000	38765000	1.44719	0.533255	0.0530025	1.2757	0	Act88F
tr|X2J6D4|X2J6D4_DROME	>tr|X2J6D4|X2J6D4_DROME Cytochrome c proximal, isoform B OS=Drosophila melanogaster GN=Cyt-c-p PE=2 SV=1;>sp|P84029|CYC2_DROME Cytochrome c-2 OS=Drosophila melanogaster GN=Cyt-c-p PE=1 SV=2	58319000	6448100	6002600	4044700	16021000	11764000	14039000	2.53549	1.34227	0.00416471	2.38042	1	Cyt-c-p
tr|A0A0B4KFZ9|A0A0B4KFZ9_DROME	>tr|A0A0B4KFZ9|A0A0B4KFZ9_DROME Histone H4 OS=Drosophila melanogaster GN=His4r PE=3 SV=1;>sp|P84040|H4_DROME Histone H4 OS=Drosophila melanogaster GN=His4 PE=1 SV=2	2649000	737220	881470	1030300					-10			-1	His4r
sp|P84345|ATP8_DROME	>sp|P84345|ATP8_DROME ATP synthase protein 8 OS=Drosophila melanogaster GN=mt:ATPase8 PE=3 SV=1	11920000	2642000		1690700	3013000	2392800	2181600	1.16746	0.223377	0.503879	0.297674	0	ATP8
sp|P91875|RPA1_DROME	>sp|P91875|RPA1_DROME DNA-directed RNA polymerase I subunit RPA1 OS=Drosophila melanogaster GN=RpI1 PE=1 SV=2	10142	4786.9	5355.2						-10			-1	RpI1
tr|M9PI82|M9PI82_DROME	>tr|M9PI82|M9PI82_DROME Mo25, isoform B OS=Drosophila melanogaster GN=Mo25 PE=4 SV=1;>sp|P91891|MO25_DROME Protein Mo25 OS=Drosophila melanogaster GN=Mo25 PE=2 SV=2	150250	56226	56404	37616					-10			-1	Mo25
sp|P91926|AP2A_DROME	>sp|P91926|AP2A_DROME AP-2 complex subunit alpha OS=Drosophila melanogaster GN=AP-2alpha PE=1 SV=1;>sp|P91926-2|AP2A_DROME Isoform B of AP-2 complex subunit alpha OS=Drosophila melanogaster GN=AP-2alpha	992980	170370	156370	254880	72672	155410	183280	0.707269	-0.499668	0.278297	0.555491	0	AP-2alpha
tr|A0A0B4KHL7|A0A0B4KHL7_DROME	>tr|A0A0B4KHL7|A0A0B4KHL7_DROME MICOS complex subunit MIC60 OS=Drosophila melanogaster GN=Mitofilin PE=3 SV=1;>sp|P91928|MIC60_DROME MICOS complex subunit Mic60 OS=Drosophila melanogaster GN=Mitofilin PE=1 SV=4;>tr|A0A0B4KGN2|A0A0B4KGN2_DROME MICOS complex	83856	31802	52054						-10			-1	Mitofilin
tr|A4V383|A4V383_DROME	>tr|A4V383|A4V383_DROME NADH dehydrogenase [ubiquinone] 1 alpha subcomplex subunit 10, mitochondrial OS=Drosophila melanogaster GN=ND-42 PE=1 SV=1;>sp|P91929|NDUAA_DROME NADH dehydrogenase [ubiquinone] 1 alpha subcomplex subunit 10, mitochondrial OS=Drosop	4350400	771460	573900	205870	1335700	734370	729110	1.80449	0.851592	0.185884	0.730757	0	ND-42
sp|P91938-4|TRXR1_DROME	>sp|P91938-4|TRXR1_DROME Isoform D of Thioredoxin reductase 1, mitochondrial OS=Drosophila melanogaster GN=Trxr-1;>sp|P91938-2|TRXR1_DROME Isoform A of Thioredoxin reductase 1, mitochondrial OS=Drosophila melanogaster GN=Trxr-1;>sp|P91938-3|TRXR1_DROME Iso	29739000	2303900	2702600	2935200	8805900	6095900	6895500	2.74466	1.45663	0.00499304	2.30163	1	Trxr-1
sp|P92177-4|1433E_DROME	>sp|P92177-4|1433E_DROME Isoform C of 14-3-3 protein epsilon OS=Drosophila melanogaster GN=14-3-3epsilon;>sp|P92177-1|1433E_DROME Isoform D of 14-3-3 protein epsilon OS=Drosophila melanogaster GN=14-3-3epsilon;>sp|P92177-2|1433E_DROME Isoform B of 14-3-3 p	11465000	2113300	2053000	1415400	2474400	1720500	1688100	1.05398	0.0758475	0.7826	0.10646	0	14-3-3epsilon
sp|P92204|NELFE_DROME	>sp|P92204|NELFE_DROME Negative elongation factor E OS=Drosophila melanogaster GN=Nelf-E PE=1 SV=1	112090				112090				10			1	Nelf-E
tr|E1JHD6|E1JHD6_DROME	>tr|E1JHD6|E1JHD6_DROME Mitogen-activated protein kinase OS=Drosophila melanogaster GN=bsk PE=1 SV=1;>sp|P92208|JNK_DROME Stress-activated protein kinase JNK OS=Drosophila melanogaster GN=bsk PE=1 SV=1	54655			54655					-10			-1	bsk
tr|E1JHK1|E1JHK1_DROME	>tr|E1JHK1|E1JHK1_DROME Dorsal-related immunity factor, isoform D OS=Drosophila melanogaster GN=Dif PE=1 SV=1;>sp|P98149|DIF_DROME Dorsal-related immunity factor Dif OS=Drosophila melanogaster GN=Dif PE=1 SV=2;>tr|E1JHK2|E1JHK2_DROME Dorsal-related immunit	207010	31744	23538			63136	88587	2.74453	1.45656	0.0690195	1.16103	0	Dif
sp|P98163|YL_DROME	>sp|P98163|YL_DROME Putative vitellogenin receptor OS=Drosophila melanogaster GN=yl PE=1 SV=2;>sp|P98163-2|YL_DROME Isoform A of Putative vitellogenin receptor OS=Drosophila melanogaster GN=yl	177080	45357	34853	49229	23324	13208	11108	0.36805	-1.44203	0.0088353	2.05378	-1	yl
tr|L0MNA2|L0MNA2_DROME	>tr|L0MNA2|L0MNA2_DROME Calcium/calmodulin-dependent protein kinase II, isoform K OS=Drosophila melanogaster GN=CaMKII PE=1 SV=1;>tr|A4V133|A4V133_DROME Calcium/calmodulin-dependent protein kinase II, isoform C OS=Drosophila melanogaster GN=CaMKII PE=1 SV=	312580		90572			137640	84363	1.22556	0.293442	0.734636	0.133928	0	CaMKII
sp|Q00174|LAMA_DROME	>sp|Q00174|LAMA_DROME Laminin subunit alpha OS=Drosophila melanogaster GN=LanA PE=1 SV=2	1373300	149130	130150	135680	414900	282510	260940	2.3095	1.20758	0.0201587	1.69554	1	LanA
tr|A0A0B4LGQ1|A0A0B4LGQ1_DROME	>tr|A0A0B4LGQ1|A0A0B4LGQ1_DROME Superoxide dismutase OS=Drosophila melanogaster GN=Sod2 PE=3 SV=1;>sp|Q00637|SODM_DROME Superoxide dismutase [Mn], mitochondrial OS=Drosophila melanogaster GN=Sod2 PE=2 SV=3	40533000	5691700	8840900	3392500	11009000	5210200	6388100	1.26121	0.334808	0.546454	0.262447	0	Sod2
sp|Q00963|SPTCB_DROME	>sp|Q00963|SPTCB_DROME Spectrin beta chain OS=Drosophila melanogaster GN=beta-Spec PE=1 SV=2;>tr|M9PF16|M9PF16_DROME Spectrin beta chain OS=Drosophila melanogaster GN=beta-Spec PE=3 SV=1;>tr|M9PHG4|M9PHG4_DROME Spectrin beta chain OS=Drosophila melanogaste	324390	41738	21387	49805	75764	53587	82114	1.87253	0.90499	0.0532163	1.27395	0	beta-Spec
tr|M9PCE0|M9PCE0_DROME	>tr|M9PCE0|M9PCE0_DROME Phosphoglycerate kinase OS=Drosophila melanogaster GN=Pgk PE=3 SV=1;>sp|Q01604|PGK_DROME Phosphoglycerate kinase OS=Drosophila melanogaster GN=Pgk PE=2 SV=2	37505000	3327000	3629800	3482300	10478000	7942700	8645400	2.59276	1.37449	0.00188665	2.72431	1	Pgk
sp|Q01637|UMPS_DROME	>sp|Q01637|UMPS_DROME Uridine 5-monophosphate synthase OS=Drosophila melanogaster GN=r-l PE=2 SV=2	4315500	752860	335900	617760	651700	999370	957890	1.52882	0.612418	0.1417	0.84863	0	r-l
tr|A0A0B4LHV4|A0A0B4LHV4_DROME	>tr|A0A0B4LHV4|A0A0B4LHV4_DROME Jaguar, isoform N OS=Drosophila melanogaster GN=jar PE=1 SV=1;>tr|H1UUJ8|H1UUJ8_DROME FI18104p1 OS=Drosophila melanogaster GN=jar PE=1 SV=1;>sp|Q01989|MYS9_DROME Myosin heavy chain 95F OS=Drosophila melanogaster GN=jar PE=2	1742100	110050	92896	132490	465040	460200	481460	4.19365	2.06821	1.09209e-05	4.96174	1	jar
sp|Q02427-1|RBP1_DROME	>sp|Q02427-1|RBP1_DROME Isoform A of RNA-binding protein 1 OS=Drosophila melanogaster GN=Rbp1;>sp|Q02427|RBP1_DROME RNA-binding protein 1 OS=Drosophila melanogaster GN=Rbp1 PE=2 SV=3;>tr|Q9VYD8|Q9VYD8_DROME RE47308p OS=Drosophila melanogaster GN=Rbp1-like	4806300	611240	450460	588870	1261400	673700	1220600	1.91188	0.934996	0.0626766	1.20289	0	Rbp1
sp|Q02645-4|HTS_DROME	>sp|Q02645-4|HTS_DROME Isoform D of Protein hu-li tai shao OS=Drosophila melanogaster GN=hts;>tr|A0A0B4K849|A0A0B4K849_DROME Hu li tai shao, isoform O OS=Drosophila melanogaster GN=hts PE=1 SV=1;>sp|Q02645-2|HTS_DROME Isoform B of Protein hu-li tai shao OS	1278600	78196	79439	67167	430810	242950	380020	4.68759	2.22885	0.00796738	2.09868	1	hts
tr|C9QP42|C9QP42_DROME	>tr|C9QP42|C9QP42_DROME Eukaryotic initiation factor 4a, isoform E OS=Drosophila melanogaster GN=eIF4A PE=1 SV=1;>sp|Q02748|IF4A_DROME Eukaryotic initiation factor 4A OS=Drosophila melanogaster GN=eIF-4a PE=1 SV=3	42064000	11574000	8608800	8660200	4383800	4292600	4544200	0.458364	-1.12543	0.00609073	2.21533	-1	eIF-4a
sp|Q03043-2|KGP24_DROME	>sp|Q03043-2|KGP24_DROME Isoform T3A of cGMP-dependent protein kinase, isozyme 2 forms cD4/T1/T3A/T3B OS=Drosophila melanogaster GN=for;>sp|Q03043|KGP24_DROME cGMP-dependent protein kinase, isozyme 2 forms cD4/T1/T3A/T3B OS=Drosophila melanogaster GN=for P	3479300	709860	582030	647910	759000	389810	390710	0.793649	-0.333427	0.357204	0.447084	0	for
tr|X2J950|X2J950_DROME	>tr|X2J950|X2J950_DROME GEO04621p1 OS=Drosophila melanogaster GN=RpS13 PE=2 SV=1;>sp|Q03334|RS13_DROME 40S ribosomal protein S13 OS=Drosophila melanogaster GN=RpS13 PE=1 SV=3	15242000	2682400	2807900	3100300	2838000	1763600	2049700	0.774253	-0.369123	0.133644	0.874051	0	RpS13
sp|Q03427|LAMC_DROME	>sp|Q03427|LAMC_DROME Lamin-C OS=Drosophila melanogaster GN=LamC PE=1 SV=2;>tr|A0A0B4KFY9|A0A0B4KFY9_DROME Lamin C, isoform B OS=Drosophila melanogaster GN=LamC PE=4 SV=1	2150400	200200	164780	258800	541990	501070	483560	2.44737	1.29123	0.000749488	3.12524	1	LamC
sp|Q04047-2|NONA_DROME	>sp|Q04047-2|NONA_DROME Isoform 2 of Protein no-on-transient A OS=Drosophila melanogaster GN=nonA;>tr|X2JFR1|X2JFR1_DROME No on or off transient A, isoform D OS=Drosophila melanogaster GN=nonA PE=1 SV=1;>sp|Q04047|NONA_DROME Protein no-on-transient A OS=Dr	870020	64343	54815	123080	333130	148230	146430	2.59162	1.37386	0.121306	0.916117	0	nonA
tr|A0A0B4KFE5|A0A0B4KFE5_DROME	>tr|A0A0B4KFE5|A0A0B4KFE5_DROME NAD-dependent methylenetetrahydrofolate dehydrogenase, isoform C OS=Drosophila melanogaster GN=Nmdmc PE=3 SV=1;>sp|Q04448-2|MTDC_DROME Isoform A of Bifunctional methylenetetrahydrofolate dehydrogenase/cyclohydrolase, mitocho	3195200	354010	272840	234140	1459000	402740	472510	2.71112	1.43889	0.225342	0.647157	0	Nmdmc
tr|A4V4U5|A4V4U5_DROME	>tr|A4V4U5|A4V4U5_DROME Sluggish A, isoform F OS=Drosophila melanogaster GN=slgA PE=1 SV=1;>sp|Q04499-2|PROD_DROME Isoform A of Proline dehydrogenase 1, mitochondrial OS=Drosophila melanogaster GN=slgA;>tr|M9NHG9|M9NHG9_DROME Sluggish A, isoform N OS=Droso	366870	120540	145750	50821	11207	29485	9061.6	0.156896	-2.67212	0.0376437	1.42431	-1	slgA
sp|Q05344|SSRP1_DROME	>sp|Q05344|SSRP1_DROME FACT complex subunit Ssrp1 OS=Drosophila melanogaster GN=Ssrp PE=1 SV=2	623360	116990	179490	130260	16637	83785	96194	0.46074	-1.11798	0.0696717	1.15694	0	Ssrp
tr|X2JH42|X2JH42_DROME	>tr|X2JH42|X2JH42_DROME ATP synthase subunit beta OS=Drosophila melanogaster GN=ATPsynbeta PE=1 SV=1;>sp|Q05825|ATPB_DROME ATP synthase subunit beta, mitochondrial OS=Drosophila melanogaster GN=ATPsynbeta PE=1 SV=3;>tr|L0MQ04|L0MQ04_DROME ATP synthase subu	32771000	5498700	4909500	3441000	7215700	5486000	6220600	1.36631	0.450285	0.0992991	1.00305	0	ATPsynbeta
sp|Q05856|RSMB_DROME	>sp|Q05856|RSMB_DROME Small nuclear ribonucleoprotein-associated protein B OS=Drosophila melanogaster GN=SmB PE=1 SV=1	976350	121840	133310	130250	219910	185060	185980	1.53334	0.616679	0.00460813	2.33648	0	SmB
sp|Q05913|T2FA_DROME	>sp|Q05913|T2FA_DROME General transcription factor IIF subunit 1 OS=Drosophila melanogaster GN=TfIIFalpha PE=1 SV=3	1323100				1323100				10			1	TfIIFalpha
sp|Q06521|VTU3_DROME	>sp|Q06521|VTU3_DROME Vitelline membrane protein Vm34Ca OS=Drosophila melanogaster GN=Vm34Ca PE=2 SV=2	31155000	10774000	10508000	9873100					-10			-1	Vm34Ca
tr|G3M3A2|G3M3A2_DROME	>tr|G3M3A2|G3M3A2_DROME Ribosomal protein S3, isoform B OS=Drosophila melanogaster GN=RpS3 PE=1 SV=1;>sp|Q06559|RS3_DROME 40S ribosomal protein S3 OS=Drosophila melanogaster GN=RpS3 PE=1 SV=1	96250000	21944000	19377000	17763000	14962000	11436000	10767000	0.62902	-0.668823	0.0148495	1.82829	0	RpS3
tr|A0A0B4LG36|A0A0B4LG36_DROME	>tr|A0A0B4LG36|A0A0B4LG36_DROME HMG protein Z, isoform C OS=Drosophila melanogaster GN=HmgZ PE=4 SV=1;>sp|Q06943|HMGZ_DROME High mobility group protein Z OS=Drosophila melanogaster GN=HmgZ PE=1 SV=1;>tr|C0MJA0|C0MJA0_DROME CG17950-PA OS=Drosophila melanoga	4787100		243390		2381700	318590	1843300	6.22265	2.63753	0.411761	0.385355	0	HmgZ
tr|A4V488|A4V488_DROME	>tr|A4V488|A4V488_DROME Inosine-5-monophosphate dehydrogenase OS=Drosophila melanogaster GN=ras PE=1 SV=1;>sp|Q07152|IMDH_DROME Inosine-5-monophosphate dehydrogenase OS=Drosophila melanogaster GN=ras PE=1 SV=1	14146000	2461800	1675700	1453800	3568100	2267200	2719100	1.52995	0.613483	0.113411	0.945346	0	ras
sp|Q07171-6|GELS_DROME	>sp|Q07171-6|GELS_DROME Isoform K of Gelsolin OS=Drosophila melanogaster GN=Gel;>tr|A0A0C4DHG2|A0A0C4DHG2_DROME Gelsolin, isoform J OS=Drosophila melanogaster GN=Gel PE=4 SV=1;>sp|Q07171|GELS_DROME Gelsolin OS=Drosophila melanogaster GN=Gel PE=1 SV=2	36079000	6477700	6107200	4816800	8390700	4898000	5388800	1.07331	0.102073	0.741378	0.129961	0	Gel
tr|A0A0C4DHG6|A0A0C4DHG6_DROME	>tr|A0A0C4DHG6|A0A0C4DHG6_DROME Gelsolin, isoform L OS=Drosophila melanogaster GN=Gel PE=4 SV=1;>sp|Q07171-2|GELS_DROME Isoform 2 of Gelsolin OS=Drosophila melanogaster GN=Gel	50493					50493			10			1	Gel
tr|M9PEL1|M9PEL1_DROME	>tr|M9PEL1|M9PEL1_DROME Ras opposite, isoform B OS=Drosophila melanogaster GN=Rop PE=3 SV=1;>sp|Q07327|ROP_DROME Protein ROP OS=Drosophila melanogaster GN=Rop PE=2 SV=2	501800	51633	60116	112060	77529	71080	129380	1.24208	0.31276	0.531575	0.274435	0	Rop
sp|Q08012|DRK_DROME	>sp|Q08012|DRK_DROME Protein enhancer of sevenless 2B OS=Drosophila melanogaster GN=drk PE=1 SV=1	4134700	546220	528330	460840	1423600	479280	696410	1.69292	0.759512	0.283807	0.546977	0	drk
sp|Q08473-2|SQD_DROME	>sp|Q08473-2|SQD_DROME Isoform A of RNA-binding protein squid OS=Drosophila melanogaster GN=sqd;>tr|A0A0B4K6U6|A0A0B4K6U6_DROME Squid, isoform E OS=Drosophila melanogaster GN=sqd PE=4 SV=1;>sp|Q08473-3|SQD_DROME Isoform C of RNA-binding protein squid OS=Dr	42678000	4533200	4644100	2787400	10432000	10807000	9474200	2.56698	1.36007	0.000971765	3.01244	1	sqd
sp|Q09332|UGGG_DROME	>sp|Q09332|UGGG_DROME UDP-glucose:glycoprotein glucosyltransferase OS=Drosophila melanogaster GN=Ugt PE=1 SV=2	11596			11596					-10			-1	Ugt
tr|E2QCG7|E2QCG7_DROME	>tr|E2QCG7|E2QCG7_DROME Eukaryotic translation initiation factor 3 subunit B OS=Drosophila melanogaster GN=eIF3b PE=1 SV=1;>sp|Q0E940|EIF3B_DROME Eukaryotic translation initiation factor 3 subunit B OS=Drosophila melanogaster GN=eIF3-S9 PE=1 SV=1	9867500	1363400	1755200	1774900	1781500	1702800	1489700	1.01645	0.0235398	0.87484	0.0580712	0	eIF3-S9
sp|Q0E9B6|RS11_DROME	>sp|Q0E9B6|RS11_DROME 40S ribosomal protein S11 OS=Drosophila melanogaster GN=RpS11 PE=1 SV=1	96278000	5909500	5956200	7116100	29813000	24750000	22733000	4.07211	2.02578	0.000818292	3.08709	1	RpS11
tr|A0A0B4LHZ4|A0A0B4LHZ4_DROME	>tr|A0A0B4LHZ4|A0A0B4LHZ4_DROME Mesh, isoform E OS=Drosophila melanogaster GN=mesh PE=1 SV=1;>sp|Q0KHY3-2|MESH_DROME Isoform 2 of Protein mesh OS=Drosophila melanogaster GN=mesh;>sp|Q0KHY3-1|MESH_DROME Isoform 1 of Protein mesh OS=Drosophila melanogaster G	143390	33844	25689	25045	26723		32094	1.04313	0.0609133	0.789515	0.10264	0	mesh
tr|X2J8C3|X2J8C3_DROME	>tr|X2J8C3|X2J8C3_DROME Angiotensin converting enzyme, isoform C OS=Drosophila melanogaster GN=Ance PE=3 SV=1;>sp|Q10714|ACE_DROME Angiotensin-converting enzyme OS=Drosophila melanogaster GN=Ance PE=1 SV=3	491430	147330	70378	56363	155980	61387		1.18966	0.250546	0.755305	0.121878	0	Ance
tr|M9MRS7|M9MRS7_DROME	>tr|M9MRS7|M9MRS7_DROME Myosin 31DF, isoform C OS=Drosophila melanogaster GN=Myo31DF PE=3 SV=1;>sp|Q23978|MY31D_DROME Myosin-IA OS=Drosophila melanogaster GN=Myo31DF PE=2 SV=1	951530	184600	181030	169290	170140	124450	122020	0.778827	-0.360626	0.0730385	1.13645	0	Myo31DF
sp|Q23979-2|MY61F_DROME	>sp|Q23979-2|MY61F_DROME Isoform B of Myosin-IB OS=Drosophila melanogaster GN=Myo61F;>sp|Q23979|MY61F_DROME Myosin-IB OS=Drosophila melanogaster GN=Myo61F PE=1 SV=3;>sp|Q23979-3|MY61F_DROME Isoform D of Myosin-IB OS=Drosophila melanogaster GN=Myo61F	2228500	220640	379160	304630	463960	447570	412570	1.46402	0.549931	0.0440996	1.35557	0	Myo61F
tr|A0A0B4LFJ1|A0A0B4LFJ1_DROME	>tr|A0A0B4LFJ1|A0A0B4LFJ1_DROME CG5210, isoform B OS=Drosophila melanogaster GN=Idgf6 PE=4 SV=1;>sp|Q23997|C5210_DROME Chitinase-like protein CG5210 OS=Drosophila melanogaster GN=CG5210 PE=1 SV=2	4111100	590230	626510	157640	1217100	695520	824040	1.9912	0.993635	0.10507	0.978523	0	CG5210
tr|E2QCR4|E2QCR4_DROME	>tr|E2QCR4|E2QCR4_DROME Bicaudal C, isoform B OS=Drosophila melanogaster GN=BicC PE=4 SV=1;>sp|Q24009|BICC_DROME Protein bicaudal C OS=Drosophila melanogaster GN=BicC PE=1 SV=2	510250	57714	57445		138800	132720	123570	2.28721	1.19359	0.000989831	3.00444	1	BicC
tr|B5RIR1|B5RIR1_DROME	>tr|B5RIR1|B5RIR1_DROME FI04125p OS=Drosophila melanogaster GN=nrv1 PE=1 SV=1;>sp|Q24046|ATPB1_DROME Sodium/potassium-transporting ATPase subunit beta-1 OS=Drosophila melanogaster GN=nrv1 PE=1 SV=2	511360		220720	48328		129770	112530	0.900583	-0.151069	0.891476	0.0498903	0	nrv1
tr|A4V0B5|A4V0B5_DROME	>tr|A4V0B5|A4V0B5_DROME Nervana 2, isoform F OS=Drosophila melanogaster GN=nrv2 PE=1 SV=1;>sp|Q24048|ATPB2_DROME Sodium/potassium-transporting ATPase subunit beta-2 OS=Drosophila melanogaster GN=nrv2 PE=1 SV=2;>tr|Q1RL12|Q1RL12_DROME IP16413p OS=Drosophila	613140	203380	249710	62267		97784		0.569221	-0.812939	0.578991	0.237328	0	nrv2
tr|Q53ZT0|Q53ZT0_DROME	>tr|Q53ZT0|Q53ZT0_DROME DNAJ-1 OS=Drosophila melanogaster GN=DnaJ-1 PE=1 SV=1;>sp|Q24133|DNAJ1_DROME DnaJ protein homolog 1 OS=Drosophila melanogaster GN=DnaJ-1 PE=1 SV=3	326830			42169	99946	51725	132990	2.25016	1.17003	0.380133	0.420064	0	DnaJ-1
sp|Q24151-3|STAT_DROME	>sp|Q24151-3|STAT_DROME Isoform B of Signal transducer and transcription activator OS=Drosophila melanogaster GN=Stat92E;>sp|Q24151-2|STAT_DROME Isoform C of Signal transducer and transcription activator OS=Drosophila melanogaster GN=Stat92E;>tr|A0A0B4KGI7	868070	142390	71076	100030	206070	153230	195270	1.76899	0.822923	0.0375731	1.42512	0	Stat92E
sp|Q24154|RL29_DROME	>sp|Q24154|RL29_DROME 60S ribosomal protein L29 OS=Drosophila melanogaster GN=RpL29 PE=1 SV=1	79270000	3472500	1434000	4110700	20915000	25023000	24315000	7.791	2.96181	0.000170201	3.76904	1	RpL29
tr|A0A0B4KGP8|A0A0B4KGP8_DROME	>tr|A0A0B4KGP8|A0A0B4KGP8_DROME Eukaryotic initiation factor 2gamma, isoform D OS=Drosophila melanogaster GN=eIF2gamma PE=4 SV=1;>sp|Q24208|IF2G_DROME Eukaryotic translation initiation factor 2 subunit 3 OS=Drosophila melanogaster GN=eIF-2gamma PE=2 SV=1;>	9805600	1582800	1411300	1904200	1573600	1601800	1732000	1.00186	0.00267773	0.985081	0.00652798	0	eIF-2gamma
sp|Q24210|CSKP_DROME	>sp|Q24210|CSKP_DROME Peripheral plasma membrane protein CASK OS=Drosophila melanogaster GN=CASK PE=1 SV=4;>tr|E1JIS7|E1JIS7_DROME CASK ortholog, isoform F OS=Drosophila melanogaster GN=CASK PE=1 SV=1;>tr|A0A0B4KH39|A0A0B4KH39_DROME CASK ortholog, isoform	97787	15845	15717	10351	25813		30061	1.99964	0.999742	0.0158448	1.80011	0	CASK
sp|Q24246-4|DYIN_DROME	>sp|Q24246-4|DYIN_DROME Isoform 1c of Cytoplasmic dynein 1 intermediate chain OS=Drosophila melanogaster GN=sw;>sp|Q24246-3|DYIN_DROME Isoform 1b of Cytoplasmic dynein 1 intermediate chain OS=Drosophila melanogaster GN=sw;>sp|Q24246-10|DYIN_DROME Isoform 4	5326400	834430	512690	403720	1625800	851700	1098100	2.04222	1.03014	0.0813069	1.08987	0	sw
sp|Q24276|CDC37_DROME	>sp|Q24276|CDC37_DROME Hsp90 co-chaperone Cdc37 OS=Drosophila melanogaster GN=Cdc37 PE=1 SV=1	5874000	365220	420800	455360	1565700	1460000	1606900	3.73181	1.89988	2.45677e-05	4.60964	1	Cdc37
sp|Q24297|RUXF_DROME	>sp|Q24297|RUXF_DROME Small nuclear ribonucleoprotein F OS=Drosophila melanogaster GN=SmF PE=1 SV=2	1523800	543590	647880	332300					-10			-1	SmF
sp|Q24298|CADE_DROME	>sp|Q24298|CADE_DROME DE-cadherin OS=Drosophila melanogaster GN=shg PE=1 SV=2	53833				20671	15016	18146		10			1	shg
sp|Q24319|OST48_DROME	>sp|Q24319|OST48_DROME Dolichyl-diphosphooligosaccharide--protein glycosyltransferase 48 kDa subunit OS=Drosophila melanogaster GN=Ost48 PE=2 SV=2	326780	37893	67426	80119	83860	31396	26085	0.762201	-0.391757	0.545468	0.263231	0	Ost48
sp|Q24368|ISWI_DROME	>sp|Q24368|ISWI_DROME Chromatin-remodeling complex ATPase chain Iswi OS=Drosophila melanogaster GN=Iswi PE=1 SV=1	76550	14864	12753	11817	34011		3103.8	1.41178	0.497517	0.67198	0.172644	0	Iswi
sp|Q24372|LACH_DROME	>sp|Q24372|LACH_DROME Lachesin OS=Drosophila melanogaster GN=Lac PE=1 SV=2	2937400		320260	507450	1015400	532310	562030	1.69926	0.764905	0.268319	0.571349	0	Lac
tr|X2JCV2|X2JCV2_DROME	>tr|X2JCV2|X2JCV2_DROME Larval serum protein 2, isoform B OS=Drosophila melanogaster GN=Lsp2 PE=4 SV=1;>sp|Q24388|LSP2_DROME Larval serum protein 2 OS=Drosophila melanogaster GN=Lsp2 PE=2 SV=2	161010000	41981000	41878000	32915000	17369000	13989000	12875000	0.378792	-1.40052	0.00183516	2.73633	-1	Lsp2
tr|A4V2J1|A4V2J1_DROME	>tr|A4V2J1|A4V2J1_DROME Muscle LIM protein at 84B, isoform B OS=Drosophila melanogaster GN=Mlp84B PE=1 SV=1;>sp|Q24400|MLP2_DROME Muscle LIM protein Mlp84B OS=Drosophila melanogaster GN=Mlp84B PE=1 SV=1	255490			52636	82768	120090		1.92699	0.946348	0.372462	0.428918	0	Mlp84B
sp|Q24439|ATPO_DROME	>sp|Q24439|ATPO_DROME ATP synthase subunit O, mitochondrial OS=Drosophila melanogaster GN=ATPsynO PE=2 SV=2	941150	217700	208620	123040	189100	90157	112530	0.71317	-0.487682	0.284173	0.546417	0	ATPsynO
sp|Q24478|CP190_DROME	>sp|Q24478|CP190_DROME Centrosome-associated zinc finger protein CP190 OS=Drosophila melanogaster GN=Cp190 PE=1 SV=2	102810				24969	18484	59357		10			1	Cp190
sp|Q24491|RX21_DROME	>sp|Q24491|RX21_DROME RNA-binding protein Rsf1 OS=Drosophila melanogaster GN=Rsf1 PE=1 SV=1;>tr|Q8SYR3|Q8SYR3_DROME RE39606p OS=Drosophila melanogaster GN=Rsf1 PE=1 SV=1	189770	40927			148840			3.63672	1.86264			0	Rsf1
sp|Q24492|RFA1_DROME	>sp|Q24492|RFA1_DROME Replication protein A 70 kDa DNA-binding subunit OS=Drosophila melanogaster GN=RpA-70 PE=1 SV=1	4059800	745620	816300	731520	597140	528720	640520	0.770188	-0.376717	0.0136582	1.86461	0	RpA-70
tr|A4V441|A4V441_DROME	>tr|A4V441|A4V441_DROME Singed, isoform B OS=Drosophila melanogaster GN=sn PE=1 SV=1;>sp|Q24524|SING_DROME Protein singed OS=Drosophila melanogaster GN=sn PE=3 SV=1	1027500	432830	350950	243770					-10			-1	sn
sp|Q24546|SYN_DROME	>sp|Q24546|SYN_DROME Synapsin OS=Drosophila melanogaster GN=Syn PE=1 SV=2;>tr|E2QCY9|E2QCY9_DROME Synapsin, isoform D OS=Drosophila melanogaster GN=Syn PE=1 SV=1;>sp|Q24546-3|SYN_DROME Isoform C of Synapsin OS=Drosophila melanogaster GN=Syn;>tr|E2QCZ0|E2QC	30642					10111	20530		10			1	Syn
sp|Q24560|TBB1_DROME	>sp|Q24560|TBB1_DROME Tubulin beta-1 chain OS=Drosophila melanogaster GN=betaTub56D PE=1 SV=2;>tr|A1ZBL0|A1ZBL0_DROME Tubulin beta chain OS=Drosophila melanogaster GN=betaTub56D PE=1 SV=1	94066000	14698000	10079000	12040000	23352000	15097000	18799000	1.55493	0.636853	0.0676006	1.17005	0	betaTub56D
sp|Q24572|CAF1_DROME	>sp|Q24572|CAF1_DROME Probable histone-binding protein Caf1 OS=Drosophila melanogaster GN=Caf1 PE=1 SV=1;>tr|E1JIL4|E1JIL4_DROME Chromatin assembly factor 1, p55 subunit, isoform B OS=Drosophila melanogaster GN=Caf1-55 PE=1 SV=1	4615300	1426700	1004900	524300	572570	515800	571000	0.561376	-0.832962	0.173548	0.760579	0	Caf1-55
sp|Q24574-2|UBPE_DROME	>sp|Q24574-2|UBPE_DROME Isoform D of Ubiquitin carboxyl-terminal hydrolase 64E OS=Drosophila melanogaster GN=Ubp64E;>sp|Q24574|UBPE_DROME Ubiquitin carboxyl-terminal hydrolase 64E OS=Drosophila melanogaster GN=Ubp64E PE=1 SV=2	34561		19824		5353.3		9384.7	0.371721	-1.42771	0.173987	0.759482	0	Usp47
sp|Q24595-2|XPC_DROME	>sp|Q24595-2|XPC_DROME Isoform 2 of DNA repair protein complementing XP-C cells homolog OS=Drosophila melanogaster GN=Xpc;>sp|Q24595|XPC_DROME DNA repair protein complementing XP-C cells homolog OS=Drosophila melanogaster GN=Xpc PE=1 SV=2;>sp|Q24595-3|XPC_	82242	34389	30728	17125					-10			-1	Xpc
tr|X2JB48|X2JB48_DROME	>tr|X2JB48|X2JB48_DROME Stress-sensitive B, isoform E OS=Drosophila melanogaster GN=sesB PE=1 SV=1;>sp|Q26365-2|ADT_DROME Isoform A of ADP,ATP carrier protein OS=Drosophila melanogaster GN=sesB;>sp|Q26365|ADT_DROME ADP,ATP carrier protein OS=Drosophila mel	117460000	23219000	27203000	20861000	17408000	15156000	13610000	0.647756	-0.626477	0.0177649	1.75044	0	sesB
tr|A0A0B4LEV2|A0A0B4LEV2_DROME	>tr|A0A0B4LEV2|A0A0B4LEV2_DROME DNA helicase OS=Drosophila melanogaster GN=dpa PE=1 SV=1;>sp|Q26454|MCM4_DROME DNA replication licensing factor MCM4 OS=Drosophila melanogaster GN=dpa PE=1 SV=2	275220	57458	74234	90699		29810	23021	0.356339	-1.48868	0.0325836	1.487	-1	dpa
tr|D3DN23|D3DN23_DROME	>tr|D3DN23|D3DN23_DROME GH23452p OS=Drosophila melanogaster GN=l(2)tid PE=1 SV=1;>sp|Q27237-2|TID_DROME Isoform B of Protein tumorous imaginal discs, mitochondrial OS=Drosophila melanogaster GN=l(2)tid;>tr|Q7KVH7|Q7KVH7_DROME Lethal (2) tumorous imaginal d	234990			34182	34019	76898	89888	1.95819	0.969524	0.434298	0.362212	0	l(2)tid
sp|Q27268|DX39B_DROME	>sp|Q27268|DX39B_DROME ATP-dependent RNA helicase WM6 OS=Drosophila melanogaster GN=Hel25E PE=1 SV=1;>tr|M9PC90|M9PC90_DROME Helicase at 25E, isoform D OS=Drosophila melanogaster GN=Hel25E PE=1 SV=1	18185000	3180600	3015100	2149700	4276700	2553700	3009100	1.17903	0.237604	0.457703	0.339416	0	Hel25E
tr|A4V0N4|A4V0N4_DROME	>tr|A4V0N4|A4V0N4_DROME MIP16230p OS=Drosophila melanogaster GN=Vha68-2 PE=1 SV=1;>sp|Q27331|VATA2_DROME V-type proton ATPase catalytic subunit A isoform 2 OS=Drosophila melanogaster GN=Vha68-2 PE=1 SV=2	40859000	7056900	5608200	6051900	8735800	6796400	6610200	1.18301	0.242462	0.22833	0.641437	0	Vha68-2
tr|A0A0B4KI24|A0A0B4KI24_DROME	>tr|A0A0B4KI24|A0A0B4KI24_DROME Nucleoplasmin, isoform B OS=Drosophila melanogaster GN=Nlp PE=4 SV=1;>sp|Q27415|NLP_DROME Nucleoplasmin-like protein OS=Drosophila melanogaster GN=Nlp PE=1 SV=1;>sp|Q27415-2|NLP_DROME Isoform 2 of Nucleoplasmin-like protein	10930000			143790	4182200	5551500	1052100	25.0036	4.64406	0.324383	0.488942	0	Nlp
tr|X2JF40|X2JF40_DROME	>tr|X2JF40|X2JF40_DROME Adenosylhomocysteinase OS=Drosophila melanogaster GN=Ahcy PE=3 SV=1;>sp|Q27580|SAHH_DROME Adenosylhomocysteinase OS=Drosophila melanogaster GN=Ahcy13 PE=2 SV=2;>tr|M9PHN8|M9PHN8_DROME Adenosylhomocysteinase OS=Drosophila melanogaste	48334000	6553900	7442400	5545600	10833000	8882200	9077300	1.47337	0.559122	0.020374	1.69092	0	Ahcy13
tr|Q8IPJ7|Q8IPJ7_DROME	>tr|Q8IPJ7|Q8IPJ7_DROME Cytochrome P450 reductase, isoform B OS=Drosophila melanogaster GN=Cpr PE=1 SV=1;>tr|M9PCQ1|M9PCQ1_DROME NADPH--cytochrome P450 reductase OS=Drosophila melanogaster GN=Cpr PE=1 SV=1;>sp|Q27597|NCPR_DROME NADPH--cytochrome P450 reduc	2710900	498820	175280	294850	729340	527750	484820	1.79773	0.846176	0.099966	1.00015	0	Cpr
tr|A0A0B4K6L4|A0A0B4K6L4_DROME	>tr|A0A0B4K6L4|A0A0B4K6L4_DROME Amidophosphoribosyltransferase OS=Drosophila melanogaster GN=Prat PE=1 SV=1;>sp|Q27601|PUR1_DROME Amidophosphoribosyltransferase OS=Drosophila melanogaster GN=Prat PE=1 SV=2	1435600	323060	229330	481090	143160	106640	152270	0.389045	-1.36199	0.0480841	1.318	-1	Prat
tr|A0A0B4LFT2|A0A0B4LFT2_DROME	>tr|A0A0B4LFT2|A0A0B4LFT2_DROME Cytochrome P450-4e2, isoform B OS=Drosophila melanogaster GN=Cyp4e2 PE=3 SV=1;>sp|Q27606|CP4E2_DROME Cytochrome P450 4e2 OS=Drosophila melanogaster GN=Cyp4e2 PE=2 SV=2	61930	31746	30183						-10			-1	Cyp4e2
tr|M9PGI3|M9PGI3_DROME	>tr|M9PGI3|M9PGI3_DROME Serine/threonine-protein phosphatase OS=Drosophila melanogaster GN=PpV PE=3 SV=1;>sp|Q27884|PPP6_DROME Serine/threonine-protein phosphatase 6 catalytic subunit OS=Drosophila melanogaster GN=PpV PE=2 SV=1	238970	144120		94860					-10			-1	PpV
tr|M9NE01|M9NE01_DROME	>tr|M9NE01|M9NE01_DROME Serine/threonine-protein phosphatase OS=Drosophila melanogaster GN=Pp2B-14D PE=3 SV=1;>sp|Q27889|PP2B2_DROME Serine/threonine-protein phosphatase 2B catalytic subunit 2 OS=Drosophila melanogaster GN=Pp2B-14D PE=1 SV=2	3384800	687250	762780	386880	345630	579360	622860	0.842638	-0.247015	0.538689	0.268662	0	Pp2B-14D
sp|Q4Z8K6-3|RBP9X_DROME	>sp|Q4Z8K6-3|RBP9X_DROME Isoform C of Ran-binding proteins 9/10 homolog OS=Drosophila melanogaster GN=RanBPM;>tr|A0A0B4KFL0|A0A0B4KFL0_DROME Ran-binding protein M, isoform F OS=Drosophila melanogaster GN=RanBPM PE=1 SV=1;>sp|Q4Z8K6-2|RBP9X_DROME Isoform A	445820	179730	19147	66964	80523	50979	48472	0.676999	-0.562775	0.588316	0.230389	0	RanBPM
sp|Q6AWN0|MTND_DROME	>sp|Q6AWN0|MTND_DROME 1,2-dihydroxy-3-keto-5-methylthiopentene dioxygenase OS=Drosophila melanogaster GN=Adi1 PE=2 SV=2	15166000	1387800	820790	806070	3513500	4159600	4477900	4.03064	2.01101	0.000881899	3.05458	1	Adi1
tr|M9PBK1|M9PBK1_DROME	>tr|M9PBK1|M9PBK1_DROME Polypeptide N-acetylgalactosaminyltransferase OS=Drosophila melanogaster GN=pgant6 PE=2 SV=1;>sp|Q6WV16|GALT6_DROME N-acetylgalactosaminyltransferase 6 OS=Drosophila melanogaster GN=pgant6 PE=2 SV=2	171880	37957	23630	17206	38578	29949	24559	1.1814	0.240497	0.553108	0.25719	0	pgant6
sp|Q70PY2|PGSB1_DROME	>sp|Q70PY2|PGSB1_DROME Peptidoglycan-recognition protein SB1 OS=Drosophila melanogaster GN=PGRP-SB1 PE=2 SV=2	36207000	1235000	1116900	1099900	13380000	9985800	9388900	9.48917	3.24628	0.00141971	2.8478	1	PGRP-SB1
sp|Q7JR71|SODE_DROME	>sp|Q7JR71|SODE_DROME Extracellular superoxide dismutase [Cu-Zn] OS=Drosophila melanogaster GN=Sod3 PE=1 SV=1;>sp|Q7JR71-2|SODE_DROME Isoform 2 of Extracellular superoxide dismutase [Cu-Zn] OS=Drosophila melanogaster GN=Sod3;>tr|A1Z8K9|A1Z8K9_DROME Superox	6018900		513870	584030	1932300	1476800	1512000	2.98819	1.57927	0.0105867	1.97524	1	Sod3
tr|A0A0B4K730|A0A0B4K730_DROME	>tr|A0A0B4K730|A0A0B4K730_DROME Ced-6, isoform F OS=Drosophila melanogaster GN=ced-6 PE=1 SV=1;>tr|E2QC90|E2QC90_DROME Ced-6, isoform B OS=Drosophila melanogaster GN=ced-6 PE=1 SV=1;>sp|Q7JUY7|CED6_DROME PTB domain-containing adapter protein ced-6 OS=Droso	127730	40882	16193	9284	27096	18267	16006	0.924803	-0.112782	0.878016	0.0564978	0	ced-6
tr|A0A0B4LFB3|A0A0B4LFB3_DROME	>tr|A0A0B4LFB3|A0A0B4LFB3_DROME Eukaryotic translation initiation factor 3 subunit M OS=Drosophila melanogaster GN=eIF3m PE=3 SV=1;>sp|Q7JVI3|EIF3M_DROME Eukaryotic translation initiation factor 3 subunit M OS=Drosophila melanogaster GN=Tango7 PE=2 SV=1	443810	41262	209680	119160		43100	30595	0.298681	-1.74332	0.26327	0.579598	0	Tango7
tr|A0A0B4LEV3|A0A0B4LEV3_DROME	>tr|A0A0B4LEV3|A0A0B4LEV3_DROME CG8635, isoform B OS=Drosophila melanogaster GN=CG8635 PE=4 SV=1;>sp|Q7JWR9|ZC3HF_DROME Zinc finger CCCH domain-containing protein 15 homolog OS=Drosophila melanogaster GN=CG8635 PE=1 SV=1	775850	121440	46093	63018	42877	274430	227980	2.36515	1.24193	0.23089	0.636596	0	CG8635
tr|E2QCZ9|E2QCZ9_DROME	>tr|E2QCZ9|E2QCZ9_DROME CG1129, isoform B OS=Drosophila melanogaster GN=CG1129 PE=1 SV=1;>sp|Q7JZB4|GMPPB_DROME Mannose-1-phosphate guanyltransferase beta OS=Drosophila melanogaster GN=CG1129 PE=2 SV=1	240080					94530	145550		10			1	CG1129
tr|E1JHX5|E1JHX5_DROME	>tr|E1JHX5|E1JHX5_DROME CG7611, isoform B OS=Drosophila melanogaster GN=Dmel\CG7611 PE=1 SV=1;>sp|Q7K0L4|WDR26_DROME WD repeat-containing protein 26 homolog OS=Drosophila melanogaster GN=CG7611 PE=1 SV=1	530850	134540	82007	59798	153120	44485	56903	0.920979	-0.11876	0.86727	0.0618458	0	CG7611
sp|Q7K0Y1|BOP1_DROME	>sp|Q7K0Y1|BOP1_DROME Ribosome biogenesis protein BOP1 homolog OS=Drosophila melanogaster GN=CG5033 PE=2 SV=1	207280			9095.2	16542	87139	94502	7.26328	2.86062	0.370361	0.431374	0	CG5033
sp|Q7K1Y4|CIAO1_DROME	>sp|Q7K1Y4|CIAO1_DROME Probable cytosolic iron-sulfur protein assembly protein Ciao1 OS=Drosophila melanogaster GN=Ciao1 PE=1 SV=1	930910	183450	86573	202470	93260	205130	160030	0.970215	-0.043623	0.927468	0.0327011	0	Ciao1
sp|Q7K2B0|RRP8_DROME	>sp|Q7K2B0|RRP8_DROME Ribosomal RNA-processing protein 8 OS=Drosophila melanogaster GN=CG7137 PE=1 SV=1	91853		18415			73438		3.98794	1.99565			0	CG7137
sp|Q7K2G1|ADRM1_DROME	>sp|Q7K2G1|ADRM1_DROME Proteasomal ubiquitin receptor ADRM1 homolog OS=Drosophila melanogaster GN=Rpn13 PE=1 SV=1;>tr|A0A0B4LFA6|A0A0B4LFA6_DROME Regulatory particle non-ATPase 13, isoform G OS=Drosophila melanogaster GN=Rpn13 PE=1 SV=1;>sp|Q7K2G1-2|ADRM1_	7563300	1262500	1205900	946820	1096800	1409700	1641700	1.21462	0.280507	0.257936	0.588488	0	Rpn13
sp|Q7K4B3|ELP2_DROME	>sp|Q7K4B3|ELP2_DROME Probable elongator complex protein 2 OS=Drosophila melanogaster GN=Elp2 PE=1 SV=1	476020	29023	67991	103720	117490	57838	99954	1.37138	0.455625	0.423489	0.373158	0	Elp2
tr|E2QD64|E2QD64_DROME	>tr|E2QD64|E2QD64_DROME CG2982, isoform B OS=Drosophila melanogaster GN=CG2982 PE=1 SV=1;>sp|Q7K4H4|NO66_DROME Bifunctional lysine-specific demethylase and histidyl-hydroxylase NO66 OS=Drosophila melanogaster GN=CG2982 PE=1 SV=1	418120	116820	59463	97264	14738	72046	57785	0.528498	-0.920031	0.148811	0.827364	0	CG2982
tr|E2QD75|E2QD75_DROME	>tr|E2QD75|E2QD75_DROME Cap binding protein 80, isoform B OS=Drosophila melanogaster GN=Cbp80 PE=1 SV=1;>sp|Q7K4N3|NCBP1_DROME Nuclear cap-binding protein subunit 1 OS=Drosophila melanogaster GN=Cbp80 PE=1 SV=1	86720			12542	23414	15114	35650	1.97146	0.979261	0.414504	0.382471	0	Cbp80
tr|E2QC56|E2QC56_DROME	>tr|E2QC56|E2QC56_DROME Uncharacterized protein, isoform B OS=Drosophila melanogaster GN=CG10417 PE=1 SV=1;>sp|Q7K4Q5|Y0417_DROME Probable protein phosphatase CG10417 OS=Drosophila melanogaster GN=CG10417 PE=1 SV=1	296800			28019	75472	53593	139710	3.19753	1.67696	0.355746	0.44886	0	CG10417
tr|A0A0B4LF26|A0A0B4LF26_DROME	>tr|A0A0B4LF26|A0A0B4LF26_DROME Eukaryotic translation initiation factor 3 subunit J OS=Drosophila melanogaster GN=eIF3j PE=3 SV=1;>sp|Q7K550|EIF3J_DROME Eukaryotic translation initiation factor 3 subunit J OS=Drosophila melanogaster GN=Adam PE=1 SV=1	663780	57524	71552		179500	124980	230230	2.76173	1.46557	0.0639113	1.19442	0	Adam
sp|Q7K556-2|TTD14_DROME	>sp|Q7K556-2|TTD14_DROME Isoform B of TRPL translocation defect protein 14 OS=Drosophila melanogaster GN=Ttd14;>sp|Q7K556|TTD14_DROME TRPL translocation defect protein 14 OS=Drosophila melanogaster GN=Ttd14 PE=1 SV=1;>tr|A8DYI2|A8DYI2_DROME Uncharacterized	187500	32513	50508	72889	31589			0.607831	-0.718257	0.474897	0.323401	0	CG30118
sp|Q7KKH3|SDA1_DROME	>sp|Q7KKH3|SDA1_DROME Protein SDA1 homolog OS=Drosophila melanogaster GN=Mys45A PE=1 SV=1	198940	13289			75572	87873	22208	4.65681	2.21934	0.351243	0.454392	0	Mys45A
tr|A0A0B4K7Z5|A0A0B4K7Z5_DROME	>tr|A0A0B4K7Z5|A0A0B4K7Z5_DROME Regulatory particle non-ATPase 6, isoform C OS=Drosophila melanogaster GN=Rpn6 PE=1 SV=1;>sp|Q7KLV9|PSD11_DROME 26S proteasome non-ATPase regulatory subunit 11 OS=Drosophila melanogaster GN=Rpn6 PE=1 SV=1;>sp|Q7KLV9-2|PSD11_	4025200	1025100	1124600	369060	1266100	28724	211650	0.598101	-0.741538	0.497392	0.303302	0	Rpn6
sp|Q7KN62|TERA_DROME	>sp|Q7KN62|TERA_DROME Transitional endoplasmic reticulum ATPase TER94 OS=Drosophila melanogaster GN=TER94 PE=1 SV=1;>tr|A0A0B4LFZ4|A0A0B4LFZ4_DROME TER94, isoform E OS=Drosophila melanogaster GN=TER94 PE=1 SV=1;>sp|Q7KN62-3|TERA_DROME Isoform C of Transiti	24749000	3300200	3733900	3544200	6886500	3295700	3988100	1.33956	0.421763	0.340275	0.46817	0	TER94
sp|Q7KN90|SYCC_DROME	>sp|Q7KN90|SYCC_DROME Cysteine--tRNA ligase, cytoplasmic OS=Drosophila melanogaster GN=CysRS PE=1 SV=1	841430	32206	160240	36560	200550	243340	168530	2.67425	1.41914	0.053776	1.26941	0	Aats-cys
tr|E2QC83|E2QC83_DROME	>tr|E2QC83|E2QC83_DROME Pabp2, isoform B OS=Drosophila melanogaster GN=Pabp2 PE=1 SV=1;>sp|Q7KNF2|PABP2_DROME Polyadenylate-binding protein 2 OS=Drosophila melanogaster GN=Pabp2 PE=1 SV=1	1299800	73959	77943	61372	462050	305980	318480	5.09443	2.34892	0.00443713	2.3529	1	Pabp2
tr|A0A0B4K812|A0A0B4K812_DROME	>tr|A0A0B4K812|A0A0B4K812_DROME Lissencephaly-1 homolog OS=Drosophila melanogaster GN=Lis-1 PE=3 SV=1;>sp|Q7KNS3|LIS1_DROME Lissencephaly-1 homolog OS=Drosophila melanogaster GN=Lis-1 PE=1 SV=2	1181100	406920	316320	173070	149690	70150	64953	0.317739	-1.65408	0.0499466	1.30149	-1	Lis-1
sp|Q7KQM6-2|GGYF1_DROME	>sp|Q7KQM6-2|GGYF1_DROME Isoform D of GIGYF family protein CG11148 OS=Drosophila melanogaster GN=CG11148;>sp|Q7KQM6|GGYF1_DROME GIGYF family protein CG11148 OS=Drosophila melanogaster GN=CG11148 PE=1 SV=2	124700	9690.9	9162.6	15537	43391	28776	18138	2.62587	1.3928	0.0702543	1.15333	0	CG11148
sp|Q7KRY7-3|LAP4_DROME	>sp|Q7KRY7-3|LAP4_DROME Isoform C of Protein lap4 OS=Drosophila melanogaster GN=scrib;>sp|Q7KRY7-5|LAP4_DROME Isoform F of Protein lap4 OS=Drosophila melanogaster GN=scrib;>sp|Q7KRY7-8|LAP4_DROME Isoform I of Protein lap4 OS=Drosophila melanogaster GN=scri	23862				16578		7284		10			1	scrib
sp|Q7KTH8|CSN8_DROME	>sp|Q7KTH8|CSN8_DROME COP9 signalosome complex subunit 8 OS=Drosophila melanogaster GN=CSN8 PE=1 SV=1	586320	99235	179140	151250	66872	46633	43192	0.36473	-1.4551	0.0207365	1.68326	-1	CSN8
sp|Q7KUT2-2|LONM_DROME	>sp|Q7KUT2-2|LONM_DROME Isoform A of Lon protease homolog, mitochondrial OS=Drosophila melanogaster GN=Lon;>sp|Q7KUT2|LONM_DROME Lon protease homolog, mitochondrial OS=Drosophila melanogaster GN=Lon PE=1 SV=1	71917	18809	28251	24857					-10			-1	Lon
sp|Q7KVQ0|GAR1_DROME	>sp|Q7KVQ0|GAR1_DROME Probable H/ACA ribonucleoprotein complex subunit 1 OS=Drosophila melanogaster GN=CG4038 PE=2 SV=1	1401300	179000	192710	161170	122070	332570	413740	1.6296	0.704516	0.269839	0.568895	0	CG4038
sp|Q7KW39-2|MMSA_DROME	>sp|Q7KW39-2|MMSA_DROME Isoform A of Probable methylmalonate-semialdehyde dehydrogenase [acylating], mitochondrial OS=Drosophila melanogaster GN=CG17896;>sp|Q7KW39|MMSA_DROME Probable methylmalonate-semialdehyde dehydrogenase [acylating], mitochondrial OS=	4895400	592010	522680	610100	1256300	934450	979860	1.83826	0.87834	0.00979124	2.00916	0	CG17896
sp|Q7PLI7|DCLK_DROME	>sp|Q7PLI7|DCLK_DROME Serine/threonine-protein kinase CG17528 OS=Drosophila melanogaster GN=CG17528 PE=1 SV=1	178270			10242	123880		44156	8.20328	3.0362	0.47891	0.319746	0	CG17528
sp|Q7YTY6|SP42D_DROME	>sp|Q7YTY6|SP42D_DROME Serine protease inhibitor 42Dd OS=Drosophila melanogaster GN=Spn42Dd PE=2 SV=1	2428300	296670	224450	286750	686930	305620	627900	2.00583	1.0042	0.0881005	1.05502	0	Spn42Dd
sp|Q868Z9-2|PPN_DROME	>sp|Q868Z9-2|PPN_DROME Isoform F of Papilin OS=Drosophila melanogaster GN=Ppn;>sp|Q868Z9|PPN_DROME Papilin OS=Drosophila melanogaster GN=Ppn PE=1 SV=2;>sp|Q868Z9-6|PPN_DROME Isoform G of Papilin OS=Drosophila melanogaster GN=Ppn;>sp|Q868Z9-5|PPN_DROME Isof	2566800	365840	301400	216490	535070	600320	547700	1.90453	0.929435	0.00501491	2.29974	0	Ppn
sp|Q86B87-4|MMD4_DROME	>sp|Q86B87-4|MMD4_DROME Isoform 62.3 of Modifier of mdg4 OS=Drosophila melanogaster GN=mod(mdg4);>tr|A0A126GUZ1|A0A126GUZ1_DROME Pre-mod(Mdg4)-V, isoform B OS=Drosophila melanogaster GN=pre-mod(mdg4)-V PE=4 SV=1;>tr|A0A0B4JDG4|A0A0B4JDG4_DROME Pre-mod(Mdg4	53949				15785	19993	18171		10			1	mod(mdg4)
sp|Q86BY9|RIG_DROME	>sp|Q86BY9|RIG_DROME Protein rigor mortis OS=Drosophila melanogaster GN=rig PE=1 SV=1	5598700	555780	511210	566020	1315800	1327500	1322400	2.42846	1.28004	1.41946e-06	5.84788	1	rig
tr|A0A126GUM8|A0A126GUM8_DROME	>tr|A0A126GUM8|A0A126GUM8_DROME Lingerer, isoform L OS=Drosophila melanogaster GN=lig PE=1 SV=1;>tr|A0A0B4K6T1|A0A0B4K6T1_DROME Lingerer, isoform I OS=Drosophila melanogaster GN=lig PE=1 SV=1;>tr|A0A0B4K7U5|A0A0B4K7U5_DROME Lingerer, isoform H OS=Drosophil	1003500	96523	184080	146130	289150	151970	135600	1.35148	0.434537	0.413903	0.383102	0	NA
sp|Q8I0G5-3|COPG_DROME	>sp|Q8I0G5-3|COPG_DROME Isoform C of Coatomer subunit gamma OS=Drosophila melanogaster GN=gammaCOP;>sp|Q8I0G5-2|COPG_DROME Isoform A of Coatomer subunit gamma OS=Drosophila melanogaster GN=gammaCOP;>sp|Q8I0G5|COPG_DROME Coatomer subunit gamma OS=Drosophila	297380	52129	49505	25283		80824	89637	2.01464	1.01052	0.0335903	1.47379	1	gammaCOP
sp|Q8I7C3-2|LASP1_DROME	>sp|Q8I7C3-2|LASP1_DROME Isoform B of LIM and SH3 domain protein Lasp OS=Drosophila melanogaster GN=Lasp;>tr|M9NDA6|M9NDA6_DROME Lasp, isoform C OS=Drosophila melanogaster GN=Lasp PE=4 SV=1;>sp|Q8I7C3|LASP1_DROME LIM and SH3 domain protein Lasp OS=Drosophi	428230	22739		54557	131500	174670	44762	3.02674	1.59776	0.220196	0.657192	0	Lasp
sp|Q8IN43|TOTC_DROME	>sp|Q8IN43|TOTC_DROME Protein Turandot C OS=Drosophila melanogaster GN=TotC PE=2 SV=1	18122000	1022500	933450	743620	5474400	4710300	5238000	5.71302	2.51425	6.06023e-05	4.21751	1	TotC
sp|Q8IN44|TOTA_DROME	>sp|Q8IN44|TOTA_DROME Protein Turandot A OS=Drosophila melanogaster GN=TotA PE=1 SV=1	4503900	432150	114900	341670	658590	1577200	1379400	4.06786	2.02427	0.0367754	1.43444	1	TotA
tr|A0A0B4LIA3|A0A0B4LIA3_DROME	>tr|A0A0B4LIA3|A0A0B4LIA3_DROME Akt1, isoform D OS=Drosophila melanogaster GN=Akt1 PE=1 SV=1;>sp|Q8INB9-2|AKT1_DROME Isoform A of RAC serine/threonine-protein kinase OS=Drosophila melanogaster GN=Akt1;>sp|Q8INB9|AKT1_DROME RAC serine/threonine-protein kina	124410	18640		42259	63508			2.08568	1.06052	0.352742	0.452543	0	Akt1
tr|A4V2P5|A4V2P5_DROME	>tr|A4V2P5|A4V2P5_DROME Peptidoglycan-recognition protein OS=Drosophila melanogaster GN=PGRP-LB PE=3 SV=1;>sp|Q8INK6-2|PGPLB_DROME Isoform A of Peptidoglycan-recognition protein LB OS=Drosophila melanogaster GN=PGRP-LB;>sp|Q8INK6|PGPLB_DROME Peptidoglycan-	278080					78928	199150		10			1	PGRP-LB
sp|Q9VGZ8|SLEL_DROME	>sp|Q9VGZ8|SLEL_DROME Slender lobes-like protein OS=Drosophila melanogaster GN=CG12592 PE=1 SV=3;>sp|Q8INM3|SLE_DROME Protein slender lobes OS=Drosophila melanogaster GN=sle PE=1 SV=1;>sp|Q8INM3-2|SLE_DROME Isoform B of Protein slender lobes OS=Drosophila	165080	100060		18284	46736			0.789833	-0.34038	0.889338	0.0509332	0	CG12592
sp|Q8IRG6|SPT16_DROME	>sp|Q8IRG6|SPT16_DROME FACT complex subunit spt16 OS=Drosophila melanogaster GN=dre4 PE=1 SV=2;>sp|Q8IRG6-2|SPT16_DROME Isoform A of FACT complex subunit spt16 OS=Drosophila melanogaster GN=dre4	1663800	186450	153830	174040	493410	322080	333970	2.23491	1.16022	0.0194792	1.71043	1	dre4
sp|Q8ML70|IMPP_DROME	>sp|Q8ML70|IMPP_DROME Immune-induced peptides OS=Drosophila melanogaster GN=IMPP PE=1 SV=3	3502000	450250	461040	277500	973500	675240	664430	1.94582	0.960377	0.0331705	1.47925	0	IMPPP
tr|A0A0B4K6N1|A0A0B4K6N1_DROME	>tr|A0A0B4K6N1|A0A0B4K6N1_DROME 40S ribosomal protein S8 OS=Drosophila melanogaster GN=RpS8 PE=3 SV=1;>sp|Q8MLY8|RS8_DROME 40S ribosomal protein S8 OS=Drosophila melanogaster GN=RpS8 PE=1 SV=1	230820000	12524000	14456000	13325000	89676000	47516000	53322000	4.72681	2.24087	0.0192378	1.71584	1	RpS8
tr|X2JA18|X2JA18_DROME	>tr|X2JA18|X2JA18_DROME Imaginal disc growth factor 3, isoform D OS=Drosophila melanogaster GN=Idgf3 PE=4 SV=1;>sp|Q8MLZ7|IDGF3_DROME Chitinase-like protein Idgf3 OS=Drosophila melanogaster GN=Idgf3 PE=1 SV=3	1749900	304810	293370	196680	444920	307910	202260	1.20158	0.264936	0.531969	0.274114	0	Idgf3
tr|H0RNI8|H0RNI8_DROME	>tr|H0RNI8|H0RNI8_DROME CG3760, isoform C OS=Drosophila melanogaster GN=CG3760-RB PE=1 SV=1;>sp|Q8MMC4-2|CDV3_DROME Isoform B of Protein CDV3 homolog OS=Drosophila melanogaster GN=CG3760;>tr|A0A0B4LGI9|A0A0B4LGI9_DROME CG3760, isoform D OS=Drosophila melan	2811900	210030	207330	88663	852330	748470	705050	4.55681	2.18802	0.000535357	3.27136	1	CG3760
sp|Q8MSV2-7|SHEP_DROME	>sp|Q8MSV2-7|SHEP_DROME Isoform H of Protein alan shepard OS=Drosophila melanogaster GN=shep;>sp|Q8MSV2-6|SHEP_DROME Isoform I of Protein alan shepard OS=Drosophila melanogaster GN=shep;>sp|Q8MSV2-4|SHEP_DROME Isoform E of Protein alan shepard OS=Drosophil	329420	78454	76628		174330			2.24823	1.16879	0.0104003	1.98295	1	shep
sp|Q8MT06|GNL3_DROME	>sp|Q8MT06|GNL3_DROME Guanine nucleotide-binding protein-like 3 homolog OS=Drosophila melanogaster GN=Ns1 PE=1 SV=2	469410				170620	150910	147870		10			1	Ns1
sp|Q8SWR8|ATX2_DROME	>sp|Q8SWR8|ATX2_DROME Ataxin-2 homolog OS=Drosophila melanogaster GN=Atx2 PE=1 SV=1;>sp|Q8SWR8-2|ATX2_DROME Isoform A of Ataxin-2 homolog OS=Drosophila melanogaster GN=Atx2;>tr|A0A0B4LH64|A0A0B4LH64_DROME Ataxin-2, isoform D OS=Drosophila melanogaster GN=A	1742600	193610	174530	82908	564610	355080	371900	2.86353	1.5178	0.0205486	1.68722	1	Atx2
tr|E6PBV6|E6PBV6_DROME	>tr|E6PBV6|E6PBV6_DROME Obg-like ATPase 1 OS=Drosophila melanogaster GN=CG1354-RA PE=1 SV=1;>sp|Q8SWU7|OLA1_DROME Obg-like ATPase 1 OS=Drosophila melanogaster GN=CG1354 PE=1 SV=1;>sp|Q8SWU7-2|OLA1_DROME Isoform B of Obg-like ATPase 1 OS=Drosophila melanoga	16863000	2742100	1220300	1857900	4662000	2839200	3541600	1.89729	0.923941	0.06521	1.18569	0	CG1354
sp|Q8SXY6|TMEDA_DROME	>sp|Q8SXY6|TMEDA_DROME Transmembrane emp24 domain-containing protein bai OS=Drosophila melanogaster GN=bai PE=2 SV=1	472550				472550				10			1	bai
tr|M9NED8|M9NED8_DROME	>tr|M9NED8|M9NED8_DROME Rudhira, isoform D OS=Drosophila melanogaster GN=rudhira PE=4 SV=1;>sp|Q8SY41|BCAS3_DROME Breast carcinoma-amplified sequence 3 homolog OS=Drosophila melanogaster GN=rudhira PE=1 SV=1;>tr|Q9VYU0|Q9VYU0_DROME Rudhira, isoform C OS=Dr	120200	17532	16084	17260	47994	21332		2.04397	1.03137	0.173324	0.761141	0	rudhira
tr|A0A0B4LGZ8|A0A0B4LGZ8_DROME	>tr|A0A0B4LGZ8|A0A0B4LGZ8_DROME GEO07517p1 OS=Drosophila melanogaster GN=Obp56d PE=1 SV=1;>sp|Q8SY61|OB56D_DROME General odorant-binding protein 56d OS=Drosophila melanogaster GN=Obp56d PE=1 SV=2	9016000	379150	285040	349260	2716700	2454100	2831700	7.89629	2.98118	3.52261e-05	4.45314	1	Obp56d
sp|Q8SYG2|CSN3_DROME	>sp|Q8SYG2|CSN3_DROME COP9 signalosome complex subunit 3 OS=Drosophila melanogaster GN=CSN3 PE=2 SV=2	211170		12798	88895	67057	42420		1.07654	0.106407	0.931349	0.0308877	0	CSN3
sp|Q8SYS7-4|NARF_DROME	>sp|Q8SYS7-4|NARF_DROME Isoform D of Probable cytosolic Fe-S cluster assembly factor CG17683 OS=Drosophila melanogaster GN=CG17683;>sp|Q8SYS7-2|NARF_DROME Isoform C of Probable cytosolic Fe-S cluster assembly factor CG17683 OS=Drosophila melanogaster GN=CG	363890	114220	55918	87367	32184		74201	0.619706	-0.690343	0.310289	0.508234	0	CG17683
tr|X2JDP6|X2JDP6_DROME	>tr|X2JDP6|X2JDP6_DROME CG4747, isoform C OS=Drosophila melanogaster GN=CG4747 PE=4 SV=1;>sp|Q8T079|GLYR1_DROME Putative oxidoreductase GLYR1 homolog OS=Drosophila melanogaster GN=CG4747 PE=1 SV=1;>tr|M9MRG2|M9MRG2_DROME CG4747, isoform B OS=Drosophila mel	900950	71969	62337	86832	201640	234070	244110	3.07419	1.62021	0.00047783	3.32073	1	CG4747
tr|A0A0B4LFD9|A0A0B4LFD9_DROME	>tr|A0A0B4LFD9|A0A0B4LFD9_DROME GEO04460p1 OS=Drosophila melanogaster GN=RpS23 PE=2 SV=1;>sp|Q8T3U2|RS23_DROME 40S ribosomal protein S23 OS=Drosophila melanogaster GN=RpS23 PE=1 SV=1	174440000	18376000	19221000	14137000	48421000	35915000	38370000	2.37186	1.24602	0.00462466	2.33492	1	RpS23
tr|A0A0B4JD46|A0A0B4JD46_DROME	>tr|A0A0B4JD46|A0A0B4JD46_DROME CG3800, isoform B OS=Drosophila melanogaster GN=CG3800 PE=2 SV=1;>sp|Q8T8R1|Y3800_DROME CCHC-type zinc finger protein CG3800 OS=Drosophila melanogaster GN=CG3800 PE=1 SV=1	9269000	3691700	2745900	2743200		42449	45755	0.0144112	-6.11667	0.00510437	2.29206	-1	CG3800
sp|Q8T9B6|MESD_DROME	>sp|Q8T9B6|MESD_DROME LDLR chaperone boca OS=Drosophila melanogaster GN=boca PE=1 SV=2	199270	127190		72081					-10			-1	boca
tr|A4V449|A4V449_DROME	>tr|A4V449|A4V449_DROME NADH dehydrogenase (Ubiquinone) 75 kDa subunit, isoform B OS=Drosophila melanogaster GN=ND-75 PE=1 SV=1;>sp|Q94511|NDUS1_DROME NADH-ubiquinone oxidoreductase 75 kDa subunit, mitochondrial OS=Drosophila melanogaster GN=ND-75 PE=2 SV=	3827700	252710	252060	257150	1191900	906210	967610	4.02368	2.00851	0.000902791	3.04441	1	ND-75
sp|Q94516|AT5F1_DROME	>sp|Q94516|AT5F1_DROME ATP synthase subunit b, mitochondrial OS=Drosophila melanogaster GN=ATPsynB PE=2 SV=2	963670	377010	94415	226330	188280		77643	0.571668	-0.806749	0.443523	0.353084	0	ATPsynB
sp|Q94517|HDAC1_DROME	>sp|Q94517|HDAC1_DROME Histone deacetylase Rpd3 OS=Drosophila melanogaster GN=Rpd3 PE=1 SV=2	2199200	328770	460790	233710	604100	387830	184000	1.14919	0.200615	0.731022	0.136069	0	HDAC1
tr|A0A0B4LEY6|A0A0B4LEY6_DROME	>tr|A0A0B4LEY6|A0A0B4LEY6_DROME Nascent polypeptide associated complex protein alpha subunit, isoform D OS=Drosophila melanogaster GN=Nacalpha PE=4 SV=1;>sp|Q94518|NACA_DROME Nascent polypeptide-associated complex subunit alpha OS=Drosophila melanogaster G	52416000	2089600	5370100	5178800	19851000	10488000	9437700	3.14726	1.6541	0.0599173	1.22245	0	Nacalpha
sp|Q94521-2|DNAT_DROME	>sp|Q94521-2|DNAT_DROME Isoform A of Dopamine N-acetyltransferase OS=Drosophila melanogaster GN=Dat;>sp|Q94521|DNAT_DROME Dopamine N-acetyltransferase OS=Drosophila melanogaster GN=Dat PE=1 SV=1	466580		85695		122350	111600	146930	1.48153	0.567091	0.187193	0.72771	0	Dat
tr|M9MRQ9|M9MRQ9_DROME	>tr|M9MRQ9|M9MRQ9_DROME Succinate--CoA ligase [ADP/GDP-forming] subunit alpha, mitochondrial OS=Drosophila melanogaster GN=Scsalpha PE=3 SV=1;>sp|Q94522|SUCA_DROME Succinate--CoA ligase [ADP/GDP-forming] subunit alpha, mitochondrial OS=Drosophila melanogas	136850000	4771400	8722500	5552000	50114000	36330000	31356000	6.18506	2.62879	0.0045766	2.33946	1	Scsalpha
sp|Q94523|SDHA_DROME	>sp|Q94523|SDHA_DROME Succinate dehydrogenase [ubiquinone] flavoprotein subunit, mitochondrial OS=Drosophila melanogaster GN=SdhA PE=2 SV=3	12598000	1523000	1564800	1346400	2673500	2457900	3032400	1.8411	0.880567	0.00232569	2.63345	0	SdhA
sp|Q94529|GS1_DROME	>sp|Q94529|GS1_DROME Probable pseudouridine-5-phosphatase OS=Drosophila melanogaster GN=Gs1l PE=2 SV=2	8603900	462840	567900	676790	2214900	2143000	2538500	4.03882	2.01393	0.000222858	3.65197	1	Gs1l
sp|Q94546|ATU_DROME	>sp|Q94546|ATU_DROME Another transcription unit protein OS=Drosophila melanogaster GN=Atu PE=1 SV=2	186550	32570	19933		65975		68074	2.55317	1.35229	0.0238001	1.62342	1	Atu
sp|Q94901|LARK_DROME	>sp|Q94901|LARK_DROME RNA-binding protein lark OS=Drosophila melanogaster GN=lark PE=1 SV=1	786400	91316	154750	121970	138890	162070	117410	1.13676	0.184933	0.495481	0.304973	0	lark
tr|M9PD75|M9PD75_DROME	>tr|M9PD75|M9PD75_DROME Porin, isoform D OS=Drosophila melanogaster GN=porin PE=4 SV=1;>sp|Q94920|VDAC_DROME Voltage-dependent anion-selective channel OS=Drosophila melanogaster GN=porin PE=1 SV=3	43312000	10238000	9266700	9446300	6442200	3661300	4258100	0.496066	-1.0114	0.00559685	2.25206	-1	porin
tr|B5RJQ0|B5RJQ0_DROME	>tr|B5RJQ0|B5RJQ0_DROME L-lactate dehydrogenase OS=Drosophila melanogaster GN=ImpL3 PE=1 SV=1;>sp|Q95028|LDH_DROME L-lactate dehydrogenase OS=Drosophila melanogaster GN=ImpL3 PE=2 SV=1	916640	441930	243200	231520					-10			-1	ImpL3
sp|Q95029-2|CATL_DROME	>sp|Q95029-2|CATL_DROME Isoform A of Cathepsin L OS=Drosophila melanogaster GN=Cp1;>sp|Q95029|CATL_DROME Cathepsin L OS=Drosophila melanogaster GN=Cp1 PE=2 SV=2;>tr|A0A0B4JD48|A0A0B4JD48_DROME Cysteine proteinase-1, isoform D OS=Drosophila melanogaster GN=	18366000	2409300	2691900	2279700	4473400	3326600	3185600	1.48838	0.573745	0.0476629	1.32182	0	Cp1
sp|Q95083|PSA5_DROME	>sp|Q95083|PSA5_DROME Proteasome subunit alpha type-5 OS=Drosophila melanogaster GN=Prosalpha5 PE=2 SV=2	6847900	881720	693300	802290	1865300	1319300	1286000	1.88053	0.911138	0.0234234	1.63035	0	Prosalpha5
sp|Q95NH6|ATTC_DROME	>sp|Q95NH6|ATTC_DROME Attacin-C OS=Drosophila melanogaster GN=AttC PE=1 SV=1	1111800	96729	59223	50668	707030	198170		6.57148	2.71622	0.137435	0.861904	0	AttC
sp|Q95RA9|GILT1_DROME	>sp|Q95RA9|GILT1_DROME GILT-like protein 1 OS=Drosophila melanogaster GN=GILT1 PE=2 SV=1	213000	141930	71073						-10			-1	GILT1
tr|Q59E30|Q59E30_DROME	>tr|Q59E30|Q59E30_DROME Failed axon connections, isoform C OS=Drosophila melanogaster GN=fax PE=1 SV=1;>sp|Q95RI5|FAXC_DROME Failed axon connections OS=Drosophila melanogaster GN=fax PE=1 SV=1;>tr|M9PFH6|M9PFH6_DROME Failed axon connections, isoform E OS=D	1493600	169070	145910	168690	493780	305290	210830	2.08799	1.06212	0.103635	0.984495	0	fax
sp|Q95RJ9|EBI_DROME	>sp|Q95RJ9|EBI_DROME F-box-like/WD repeat-containing protein ebi OS=Drosophila melanogaster GN=ebi PE=1 SV=2	108340				63903		44440		10			1	ebi
sp|Q95RN0-2|U528_DROME	>sp|Q95RN0-2|U528_DROME Isoform B of UPF0528 protein CG10038 OS=Drosophila melanogaster GN=CG10038;>sp|Q95RN0|U528_DROME UPF0528 protein CG10038 OS=Drosophila melanogaster GN=CG10038 PE=2 SV=1	242290				80202	92626	69461		10			1	CG10038
tr|F3YDF6|F3YDF6_DROME	>tr|F3YDF6|F3YDF6_DROME MIP08376p OS=Drosophila melanogaster GN=Sap47 PE=1 SV=1;>tr|A0A0B4LH71|A0A0B4LH71_DROME Synapse-associated protein 47kD, isoform K OS=Drosophila melanogaster GN=Sap47 PE=1 SV=1;>sp|Q960T2-3|SAP47_DROME Isoform I of Synapse-associate	757180		86031	84539	177270	200210	209130	2.29274	1.19708	0.00290489	2.53687	1	Sap47
tr|A4V4A1|A4V4A1_DROME	>tr|A4V4A1|A4V4A1_DROME Kinesin-like protein OS=Drosophila melanogaster GN=Klp10A PE=1 SV=1;>sp|Q960Z0|KI10A_DROME Kinesin-like protein Klp10A OS=Drosophila melanogaster GN=Klp10A PE=1 SV=1	1060100	282050	156240	158930	171920	116660	174320	0.775091	-0.367562	0.381465	0.418545	0	Klp10A
sp|Q99323-2|MYSN_DROME	>sp|Q99323-2|MYSN_DROME Isoform 2 of Myosin heavy chain, non-muscle OS=Drosophila melanogaster GN=zip;>sp|Q99323-4|MYSN_DROME Isoform 4 of Myosin heavy chain, non-muscle OS=Drosophila melanogaster GN=zip;>sp|Q99323-1|MYSN_DROME Isoform 1 of Myosin heavy ch	494830	26677	19125	11370	201700	117190	118770	7.65515	2.93643	0.0109204	1.96176	1	zip
sp|Q9GU68|IF5A_DROME	>sp|Q9GU68|IF5A_DROME Eukaryotic translation initiation factor 5A OS=Drosophila melanogaster GN=eIF-5A PE=2 SV=2	41697000	5218600	1603500	5452800	13142000	8257200	8022800	2.39692	1.26118	0.0516594	1.28685	0	eIF-5A
tr|E4NKG1|E4NKG1_DROME	>tr|E4NKG1|E4NKG1_DROME Caprin, isoform B OS=Drosophila melanogaster GN=Capr PE=1 SV=1;>sp|Q9I7D3|CAPR1_DROME Caprin homolog OS=Drosophila melanogaster GN=Capr PE=1 SV=1	570790	29093	99840	37014	104610	130370	169860	2.43957	1.28663	0.0533148	1.27315	0	Capr
sp|Q9I7H9|OGFD1_DROME	>sp|Q9I7H9|OGFD1_DROME Prolyl 3-hydroxylase sudestada1 OS=Drosophila melanogaster GN=sud1 PE=2 SV=1	349870	122190	45135	36059	82458		64031	1.08039	0.111549	0.889087	0.0510558	0	sud1
sp|Q9I7K5|TMEDE_DROME	>sp|Q9I7K5|TMEDE_DROME Transmembrane emp24 domain-containing protein eca OS=Drosophila melanogaster GN=eca PE=2 SV=2;>tr|Q86BA5|Q86BA5_DROME LP01981p OS=Drosophila melanogaster GN=p24-2 PE=2 SV=1	382960	214930		168030					-10			-1	eca
tr|F0JAN1|F0JAN1_DROME	>tr|F0JAN1|F0JAN1_DROME Ade5, isoform B OS=Drosophila melanogaster GN=ade5 PE=1 SV=1;>sp|Q9I7S8|PUR6_DROME Multifunctional protein ADE2 OS=Drosophila melanogaster GN=ade5 PE=2 SV=2	52768000	7617400	7757600	6192300	10566000	9610900	11023000	1.44663	0.532696	0.00783756	2.10582	0	ade5
sp|Q9I7U4-3|TITIN_DROME	>sp|Q9I7U4-3|TITIN_DROME Isoform B of Titin OS=Drosophila melanogaster GN=sls	7735.6			530.31	3098.8	2156.3	1950.1	4.52892	2.17917	0.118035	0.927988	0	sls
sp|Q9NBK5-3|TRC_DROME	>sp|Q9NBK5-3|TRC_DROME Isoform B of Serine/threonine-protein kinase tricorner OS=Drosophila melanogaster GN=trc;>sp|Q9NBK5-2|TRC_DROME Isoform A of Serine/threonine-protein kinase tricorner OS=Drosophila melanogaster GN=trc;>sp|Q9NBK5-4|TRC_DROME Isoform C	249460				165990	83472			10			1	trc
sp|Q9NFP5|SH3BG_DROME	>sp|Q9NFP5|SH3BG_DROME SH3 domain-binding glutamic acid-rich protein homolog OS=Drosophila melanogaster GN=Sh3beta PE=1 SV=2;>tr|M9MSK4|M9MSK4_DROME Sh3beta, isoform D OS=Drosophila melanogaster GN=Sh3beta PE=4 SV=1;>tr|M9MRQ6|M9MRQ6_DROME Sh3beta, isoform	12259000	1420500	1003700	1204600	2452200	3005800	3172700	2.37839	1.24999	0.0025797	2.58843	1	Sh3beta
sp|Q9NFU0-3|FMR1_DROME	>sp|Q9NFU0-3|FMR1_DROME Isoform E of Synaptic functional regulator FMR1 OS=Drosophila melanogaster GN=Fmr1;>tr|A0A126GUS7|A0A126GUS7_DROME Fmr1, isoform J OS=Drosophila melanogaster GN=Fmr1 PE=1 SV=1;>sp|Q9NFU0-2|FMR1_DROME Isoform C of Synaptic functional	3775200	373960	366700	498790	927420	826420	781950	2.0459	1.03274	0.00206393	2.6853	1	Fmr1
sp|Q9NHA8|BGBP3_DROME	>sp|Q9NHA8|BGBP3_DROME Gram-negative bacteria-binding protein 3 OS=Drosophila melanogaster GN=GNBP3 PE=1 SV=2	2029000				735610	791520	501840		10			1	GNBP3
sp|Q9NHB0|BGBP1_DROME	>sp|Q9NHB0|BGBP1_DROME Gram-negative bacteria-binding protein 1 OS=Drosophila melanogaster GN=GNBP1 PE=2 SV=2	186520	74303	74129	27937		10150		0.172649	-2.53408	0.255617	0.59241	0	GNBP1
sp|Q9NHD5|SAN_DROME	>sp|Q9NHD5|SAN_DROME Probable N-acetyltransferase san OS=Drosophila melanogaster GN=san PE=1 SV=1	3405800	216090	799280	416310	691010	502320	780780	1.37888	0.463493	0.3946	0.403843	0	san
tr|A0A0B4JD11|A0A0B4JD11_DROME	>tr|A0A0B4JD11|A0A0B4JD11_DROME Ef1gamma, isoform C OS=Drosophila melanogaster GN=eEF1gamma PE=4 SV=1;>sp|Q9NJH0|EF1G_DROME Elongation factor 1-gamma OS=Drosophila melanogaster GN=Ef1gamma PE=2 SV=2	80862000	13830000	12187000	10740000	19207000	11982000	12915000	1.19988	0.26289	0.371993	0.429465	0	Ef1gamma
tr|A0A0S0WNN6|A0A0S0WNN6_DROME	>tr|A0A0S0WNN6|A0A0S0WNN6_DROME Embargoed, isoform B OS=Drosophila melanogaster GN=emb PE=1 SV=1;>sp|Q9TVM2|XPO1_DROME Exportin-1 OS=Drosophila melanogaster GN=emb PE=1 SV=1	265360	70949	50187	38708	51404	29875	24233	0.660094	-0.599258	0.222533	0.652606	0	emb
sp|Q9TVP3-2|JDP_DROME	>sp|Q9TVP3-2|JDP_DROME Isoform A of J domain-containing protein OS=Drosophila melanogaster GN=jdp;>sp|Q9TVP3|JDP_DROME J domain-containing protein OS=Drosophila melanogaster GN=jdp PE=2 SV=2	459710				124260	133290	202170		10			1	jdp
tr|D2NUK9|D2NUK9_DROME	>tr|D2NUK9|D2NUK9_DROME Hoi-polloi, isoform B OS=Drosophila melanogaster GN=hoip PE=1 SV=1;>sp|Q9U3Z7|NH2L1_DROME NHP2-like protein 1 homolog OS=Drosophila melanogaster GN=hoip PE=2 SV=1	2606100	143560	180710	314080	738970	550240	678580	3.08262	1.62416	0.00431146	2.36538	1	hoip
sp|Q9U616|GCSH_DROME	>sp|Q9U616|GCSH_DROME Glycine cleavage system H protein, mitochondrial OS=Drosophila melanogaster GN=ppl PE=2 SV=1	13099000	1411100	1700000	628090	3648600	2938900	2772400	2.50319	1.32377	0.010969	1.95983	1	ppl
sp|Q9U6Y9-2|ANM5_DROME	>sp|Q9U6Y9-2|ANM5_DROME Isoform 2 of Protein arginine N-methyltransferase 5 OS=Drosophila melanogaster GN=csul;>sp|Q9U6Y9|ANM5_DROME Protein arginine N-methyltransferase 5 OS=Drosophila melanogaster GN=csul PE=1 SV=2	60759		20663				40096	1.94047	0.956409			0	csul
sp|Q9U915|KAD2_DROME	>sp|Q9U915|KAD2_DROME Adenylate kinase OS=Drosophila melanogaster GN=Adk2 PE=1 SV=1	5330200	476100	372570	241550	1010500	1602200	1627300	3.88912	1.95944	0.00783363	2.10604	1	Adk2
sp|Q9U9Q4|EIF3H_DROME	>sp|Q9U9Q4|EIF3H_DROME Eukaryotic translation initiation factor 3 subunit H OS=Drosophila melanogaster GN=eIF-3p40 PE=1 SV=2	12379000	2105000	2120600	2494900	2351900	1689200	1617500	0.841991	-0.248123	0.254454	0.59439	0	eIF-3p40
tr|X2J9R2|X2J9R2_DROME	>tr|X2J9R2|X2J9R2_DROME Coproporphyrinogen oxidase, isoform B OS=Drosophila melanogaster GN=Coprox PE=4 SV=1;>sp|Q9V3D2|HEM6_DROME Oxygen-dependent coproporphyrinogen-III oxidase OS=Drosophila melanogaster GN=Coprox PE=2 SV=1	1189200	227740	248940	154670	226250	194850	136790	0.883646	-0.178459	0.561809	0.250411	0	Coprox
sp|Q9V3G1|RL8_DROME	>sp|Q9V3G1|RL8_DROME 60S ribosomal protein L8 OS=Drosophila melanogaster GN=RpL8 PE=1 SV=1	170750000	11754000	12622000	9911600	45919000	42889000	47658000	3.98004	1.99278	2.92465e-05	4.53393	1	RpL8
sp|Q9V3G7|PSMD6_DROME	>sp|Q9V3G7|PSMD6_DROME 26S proteasome non-ATPase regulatory subunit 6 OS=Drosophila melanogaster GN=Rpn7 PE=2 SV=1	4405200	1328500	998990	645480	431220	323780	677240	0.481754	-1.05363	0.08289	1.0815	0	Rpn7
sp|Q9V3H2|PSDE_DROME	>sp|Q9V3H2|PSDE_DROME 26S proteasome non-ATPase regulatory subunit 14 OS=Drosophila melanogaster GN=Rpn11 PE=1 SV=1	2490900	617200	622470	439480	578610		233100	0.725108	-0.463732	0.38148	0.418528	0	Rpn11
sp|Q9V3J1-3|VATH_DROME	>sp|Q9V3J1-3|VATH_DROME Isoform D of V-type proton ATPase subunit H OS=Drosophila melanogaster GN=VhaSFD;>tr|M9PDK5|M9PDK5_DROME Vacuolar H[+]-ATPase SFD subunit, isoform E OS=Drosophila melanogaster GN=VhaSFD PE=4 SV=1;>sp|Q9V3J1|VATH_DROME V-type proton	948320	224730	171970	227340	65116	132080	127080	0.51964	-0.944416	0.0236513	1.62615	0	VhaSFD
sp|Q9V3J4|SEC13_DROME	>sp|Q9V3J4|SEC13_DROME Protein SEC13 homolog OS=Drosophila melanogaster GN=Sec13 PE=1 SV=1	8135100	2572000	2062300	687110	1333600	803360	676700	0.528743	-0.919361	0.234563	0.629741	0	Sec13
tr|M9PFN1|M9PFN1_DROME	>tr|M9PFN1|M9PFN1_DROME RuvB-like helicase OS=Drosophila melanogaster GN=rept PE=3 SV=1;>sp|Q9V3K3|RUVB2_DROME RuvB-like helicase 2 OS=Drosophila melanogaster GN=rept PE=1 SV=1	2938000	630700	600800	709690	360250	250500	386090	0.51352	-0.961507	0.00396093	2.4022	0	rept
sp|Q9V3L6|NCBP2_DROME	>sp|Q9V3L6|NCBP2_DROME Nuclear cap-binding protein subunit 2 OS=Drosophila melanogaster GN=Cbp20 PE=1 SV=1	1221500	194710	636980	267410		122350		0.333955	-1.58227	0.466916	0.330761	0	Cbp20
sp|Q9V3N1|SP27A_DROME	>sp|Q9V3N1|SP27A_DROME Serine protease inhibitor 27A OS=Drosophila melanogaster GN=Spn27A PE=1 SV=1	538080			109070	188500	162390	78118	1.31111	0.390788	0.661113	0.179724	0	Spn27A
tr|X2JF59|X2JF59_DROME	>tr|X2JF59|X2JF59_DROME Thioredoxin peroxidase 1, isoform C OS=Drosophila melanogaster GN=Jafrac1 PE=1 SV=1;>sp|Q9V3P0|PRDX1_DROME Peroxiredoxin 1 OS=Drosophila melanogaster GN=Jafrac1 PE=1 SV=1	127170000	19363000	14062000	17698000	24290000	26381000	25373000	1.48747	0.572862	0.00775074	2.11066	0	Jafrac1
tr|A0A0B4KHE9|A0A0B4KHE9_DROME	>tr|A0A0B4KHE9|A0A0B4KHE9_DROME Regulatory particle non-ATPase 2, isoform C OS=Drosophila melanogaster GN=Rpn2 PE=4 SV=1;>sp|Q9V3P6|PSMD1_DROME 26S proteasome non-ATPase regulatory subunit 1 OS=Drosophila melanogaster GN=Rpn2 PE=1 SV=1;>tr|A0A0B4KI10|A0A0B	5791600	1028600	1043700	835670	1113900	819020	950710	0.99163	-0.0121263	0.94395	0.0250511	0	Rpn2
sp|Q9V3S0|CP4G1_DROME	>sp|Q9V3S0|CP4G1_DROME Cytochrome P450 4g1 OS=Drosophila melanogaster GN=Cyp4g1 PE=2 SV=1	24536000	3618700	3949500	2227500	4826300	4837600	5076300	1.50476	0.589536	0.0366678	1.43572	0	Cyp4g1
tr|B5RIV0|B5RIV0_DROME	>tr|B5RIV0|B5RIV0_DROME Bubblegum, isoform C OS=Drosophila melanogaster GN=bgm PE=1 SV=1;>sp|Q9V3S9|BGM_DROME Very long-chain-fatty-acid--CoA ligase bubblegum OS=Drosophila melanogaster GN=bgm PE=2 SV=1	298400		64080	72221	162100			2.37856	1.25009	0.0476849	1.32162	1	bgm
tr|M9PCI2|M9PCI2_DROME	>tr|M9PCI2|M9PCI2_DROME GEO11453p1 OS=Drosophila melanogaster GN=NHP2 PE=2 SV=1;>sp|Q9V3U2|NHP2_DROME H/ACA ribonucleoprotein complex subunit 2-like protein OS=Drosophila melanogaster GN=NHP2 PE=1 SV=1	7209600	574480	335050	356520	2541100	1718700	1683700	4.69452	2.23098	0.00581142	2.23572	1	NHP2
sp|Q9V3W0|UK114_DROME	>sp|Q9V3W0|UK114_DROME RutC family protein UK114 OS=Drosophila melanogaster GN=UK114 PE=2 SV=1	26630000	2796400	4648200	3009100	5533900	5633800	5008200	1.54739	0.629832	0.0364152	1.43872	0	UK114
sp|Q9V3Y2|DRE2_DROME	>sp|Q9V3Y2|DRE2_DROME Anamorsin homolog OS=Drosophila melanogaster GN=CIAPIN1 PE=2 SV=1	1856400	140020	164950	172790	513440	464410	400850	2.88576	1.52895	0.000912651	3.0397	1	CIAPIN1
tr|X2J8E8|X2J8E8_DROME	>tr|X2J8E8|X2J8E8_DROME Lethal (2) 34Fc, isoform B OS=Drosophila melanogaster GN=l(2)34Fc PE=4 SV=1;>sp|Q9V3Y3|DFP_DROME Defense protein l(2)34Fc OS=Drosophila melanogaster GN=l(2)34Fc PE=2 SV=1	2403500				1333800	563100	506610		10			1	l(2)34Fc
sp|Q9V429-2|THIO2_DROME	>sp|Q9V429-2|THIO2_DROME Isoform Short of Thioredoxin-2 OS=Drosophila melanogaster GN=Trx-2;>sp|Q9V429|THIO2_DROME Thioredoxin-2 OS=Drosophila melanogaster GN=Trx-2 PE=1 SV=2	27770000	4544100	4205100	3520300	7763500	3587400	4149800	1.26335	0.337257	0.467381	0.330329	0	Trx-2
sp|Q9V460|SPT5H_DROME	>sp|Q9V460|SPT5H_DROME Transcription elongation factor SPT5 OS=Drosophila melanogaster GN=Spt5 PE=1 SV=1;>sp|Q9V460-2|SPT5H_DROME Isoform B of Transcription elongation factor SPT5 OS=Drosophila melanogaster GN=Spt5	6767800	16980	11987		3011000	2469600	1258200	155.091	7.27698	0.0445117	1.35153	1	Spt5
sp|Q9V461|MCM6_DROME	>sp|Q9V461|MCM6_DROME DNA replication licensing factor Mcm6 OS=Drosophila melanogaster GN=Mcm6 PE=1 SV=1	1101600	252470	312710	201150	138710	110350	86203	0.437492	-1.19267	0.0156989	1.80413	-1	Mcm6
tr|C0MIY4|C0MIY4_DROME	>tr|C0MIY4|C0MIY4_DROME Anti-silencing factor 1, isoform B OS=Drosophila melanogaster GN=asf1 PE=1 SV=1;>sp|Q9V464|ASF1_DROME Histone chaperone asf1 OS=Drosophila melanogaster GN=asf1 PE=1 SV=1	3990100	219830	388950	275880	1242600	909470	953390	3.51034	1.81161	0.003067	2.51329	1	asf1
tr|L0MPS3|L0MPS3_DROME	>tr|L0MPS3|L0MPS3_DROME Apolipophorin, isoform B OS=Drosophila melanogaster GN=apolpp PE=1 SV=1;>sp|Q9V496|APLP_DROME Apolipophorins OS=Drosophila melanogaster GN=Rfabg PE=1 SV=2	305190000	62494000	60434000	60098000	52246000	34787000	35127000	0.667446	-0.583277	0.0251081	1.60019	0	Rfabg
tr|H1UUE5|H1UUE5_DROME	>tr|H1UUE5|H1UUE5_DROME Cyp4ad1, isoform B OS=Drosophila melanogaster GN=Cyp4ad1 PE=2 SV=1;>sp|Q9V4T3|C4AD1_DROME Probable cytochrome P450 4ad1 OS=Drosophila melanogaster GN=Cyp4ad1 PE=2 SV=1	264610				136260	68895	59453		10			1	Cyp4ad1
sp|Q9V521|PPO2_DROME	>sp|Q9V521|PPO2_DROME Phenoloxidase 2 OS=Drosophila melanogaster GN=PPO2 PE=1 SV=1	61310000	8139300	8316400	6763900	13305000	12053000	12733000	1.64047	0.714107	0.00124457	2.90498	0	PPO2
sp|Q9V535|RBM8A_DROME	>sp|Q9V535|RBM8A_DROME RNA-binding protein 8A OS=Drosophila melanogaster GN=tsu PE=1 SV=1	3649500	342790	446910	519610	1155000	376210	808920	1.7873	0.837782	0.211182	0.675343	0	tsu
sp|Q9V595|DCUP_DROME	>sp|Q9V595|DCUP_DROME Uroporphyrinogen decarboxylase OS=Drosophila melanogaster GN=Updo PE=3 SV=1	465060				132190	185390	147480		10			1	Updo
sp|Q9V597|RL31_DROME	>sp|Q9V597|RL31_DROME 60S ribosomal protein L31 OS=Drosophila melanogaster GN=RpL31 PE=1 SV=1	26167000	1699000	4969800	2904000	6421100	4385000	5788200	1.73348	0.793675	0.106799	0.971431	0	RpL31
sp|Q9V5C6|PSA3_DROME	>sp|Q9V5C6|PSA3_DROME Proteasome subunit alpha type-3 OS=Drosophila melanogaster GN=Prosalpha7 PE=1 SV=1	8139700	1113900	826270	2137500	1810700	1148500	1102800	0.996157	-0.00555479	0.991465	0.00372281	0	Prosalpha7
tr|A0A0B4KEK7|A0A0B4KEK7_DROME	>tr|A0A0B4KEK7|A0A0B4KEK7_DROME PI31, isoform D OS=Drosophila melanogaster GN=PI31 PE=4 SV=1;>sp|Q9V637|PSMF1_DROME Proteasome inhibitor PI31 subunit OS=Drosophila melanogaster GN=PI31 PE=1 SV=1	403780				208050		195730		10			1	PI31
tr|B6IDY5|B6IDY5_DROME	>tr|B6IDY5|B6IDY5_DROME CYP6G1 OS=Drosophila melanogaster GN=Cyp6g1 PE=2 SV=1;>sp|Q9V674|CP6G1_DROME Cytochrome P450 6g1 OS=Drosophila melanogaster GN=Cyp6g1 PE=2 SV=1	189350	103930	85427						-10			-1	Cyp6g1
sp|Q9V677|ECM29_DROME	>sp|Q9V677|ECM29_DROME Proteasome-associated protein ECM29 homolog OS=Drosophila melanogaster GN=CG8858 PE=1 SV=1	32928	13230	6917.8	12780					-10			-1	CG8858
tr|A0A0B4LGC0|A0A0B4LGC0_DROME	>tr|A0A0B4LGC0|A0A0B4LGC0_DROME Tripeptidyl-peptidase II, isoform F OS=Drosophila melanogaster GN=TppII PE=4 SV=1;>sp|Q9V6K1-2|TPP2_DROME Isoform 2 of Tripeptidyl-peptidase 2 OS=Drosophila melanogaster GN=TppII;>sp|Q9V6K1|TPP2_DROME Tripeptidyl-peptidase 2	14438000	2897200	1878800	1691800	3197000	2469800	2303200	1.23226	0.301305	0.341531	0.466571	0	TppII
sp|Q9V6U8|UBA3_DROME	>sp|Q9V6U8|UBA3_DROME Nedd8-activating enzyme E1 catalytic subunit OS=Drosophila melanogaster GN=Uba3 PE=1 SV=1	758020	171720	324930	118730	79550	63102		0.347717	-1.52402	0.193221	0.713946	0	Uba3
tr|H8F4T6|H8F4T6_DROME	>tr|H8F4T6|H8F4T6_DROME FI19911p1 OS=Drosophila melanogaster GN=CG16935-RA PE=1 SV=1;>sp|Q9V6U9|MECR_DROME Enoyl-[acyl-carrier-protein] reductase, mitochondrial OS=Drosophila melanogaster GN=CG16935 PE=3 SV=2	3341700	777930	778970	631520	478220	301240	373810	0.526988	-0.924159	0.00826895	2.08255	0	CG16935
sp|Q9V7D2|VATD1_DROME	>sp|Q9V7D2|VATD1_DROME V-type proton ATPase subunit D 1 OS=Drosophila melanogaster GN=Vha36-1 PE=2 SV=1;>tr|X2JE14|X2JE14_DROME Vacuolar H[+] ATPase 36kD subunit 3, isoform C OS=Drosophila melanogaster GN=Vha36-3 PE=4 SV=1;>sp|Q9NEF6|VATD2_DROME Probable V	582660	56759	72966	99681	197950	155310		2.30983	1.20779	0.0215002	1.66756	1	Vha36-1
sp|Q9V7N5-2|VATC_DROME	>sp|Q9V7N5-2|VATC_DROME Isoform A of V-type proton ATPase subunit C OS=Drosophila melanogaster GN=Vha44;>sp|Q9V7N5-3|VATC_DROME Isoform C of V-type proton ATPase subunit C OS=Drosophila melanogaster GN=Vha44;>tr|B7YZI0|B7YZI0_DROME Vacuolar H[+] ATPase 44k	2699100	448190	468470	472790	552760	253310	503570	0.94256	-0.0853436	0.789085	0.102876	0	Vha44
sp|Q9V7Y2|SGPL_DROME	>sp|Q9V7Y2|SGPL_DROME Sphingosine-1-phosphate lyase OS=Drosophila melanogaster GN=Sply PE=2 SV=1	172590	31927	33627	37067		33737	36227	1.02266	0.0323212	0.743644	0.128635	0	Sply
tr|A0A0B4LFH0|A0A0B4LFH0_DROME	>tr|A0A0B4LFH0|A0A0B4LFH0_DROME S-methyl-5-thioadenosine phosphorylase OS=Drosophila melanogaster GN=Mtap PE=3 SV=1;>sp|Q9V813|MTAP_DROME S-methyl-5-thioadenosine phosphorylase OS=Drosophila melanogaster GN=Mtap PE=2 SV=1;>tr|A0A0B4KG54|A0A0B4KG54_DROME	1972600	232030	166440	233740	393550	548760	398040	2.1201	1.08413	0.0132127	1.87901	1	Mtap
tr|B7YZR7|B7YZR7_DROME	>tr|B7YZR7|B7YZR7_DROME Mapmodulin, isoform B OS=Drosophila melanogaster GN=Mapmodulin PE=1 SV=1;>sp|Q9V895|AN32A_DROME Acidic leucine-rich nuclear phosphoprotein 32 family member A OS=Drosophila melanogaster GN=Anp32a PE=2 SV=1;>tr|E1JGK5|E1JGK5_DROME Map	522220	130380	237730	154110					-10			-1	Mapmodulin
sp|Q9V8R9|41_DROME	>sp|Q9V8R9|41_DROME Protein 4.1 homolog OS=Drosophila melanogaster GN=cora PE=1 SV=1;>tr|A0A0B4LFX4|A0A0B4LFX4_DROME Coracle, isoform F OS=Drosophila melanogaster GN=cora PE=1 SV=1;>tr|A0A0B4LG23|A0A0B4LG23_DROME Coracle, isoform G OS=Drosophila melanogast	3650400	350680	228970	234890	1125100	830590	880240	3.48163	1.79976	0.00246084	2.60892	1	cora
sp|Q9V8Y2|OB56A_DROME	>sp|Q9V8Y2|OB56A_DROME General odorant-binding protein 56a OS=Drosophila melanogaster GN=Obp56a PE=2 SV=1	3185400			269970	1180700	1284900	449800	3.59966	1.84786	0.313372	0.503939	0	Obp56a
tr|A0A0B4LG04|A0A0B4LG04_DROME	>tr|A0A0B4LG04|A0A0B4LG04_DROME Uncharacterized protein, isoform B OS=Drosophila melanogaster GN=galla-1 PE=4 SV=1;>sp|Q9V968|U195B_DROME MIP18 family protein CG30152 OS=Drosophila melanogaster GN=CG30152 PE=1 SV=1	523760				330620	193140			10			1	CG30152
sp|Q9V998|UBL5_DROME	>sp|Q9V998|UBL5_DROME Ubiquitin-like protein 5 OS=Drosophila melanogaster GN=ubl PE=3 SV=1	1489000	829370	659650						-10			-1	ubl
sp|Q9V9A7|MCCB_DROME	>sp|Q9V9A7|MCCB_DROME Probable methylcrotonoyl-CoA carboxylase beta chain, mitochondrial OS=Drosophila melanogaster GN=l(2)04524 PE=2 SV=1	896440	204680	266290	198820	121440	67104	38111	0.338397	-1.56321	0.0105589	1.97638	-1	CG3267
tr|A0A0B4LES3|A0A0B4LES3_DROME	>tr|A0A0B4LES3|A0A0B4LES3_DROME CG3107, isoform D OS=Drosophila melanogaster GN=CG3107 PE=4 SV=1;>sp|Q9V9E3|PREP_DROME Presequence protease, mitochondrial OS=Drosophila melanogaster GN=CG3107 PE=2 SV=2	1147900	182760	151490	200860	251370	198350	163060	1.14515	0.195534	0.428797	0.367749	0	CG3107
sp|Q9V9I4|OR42B_DROME	>sp|Q9V9I4|OR42B_DROME Odorant receptor 42b OS=Drosophila melanogaster GN=Or42b PE=2 SV=2	323120			323120					-10			-1	Or42b
tr|A0A0B4KEI5|A0A0B4KEI5_DROME	>tr|A0A0B4KEI5|A0A0B4KEI5_DROME Ars2, isoform E OS=Drosophila melanogaster GN=Ars2 PE=1 SV=1;>sp|Q9V9K7|SRRT_DROME Serrate RNA effector molecule homolog OS=Drosophila melanogaster GN=Ars2 PE=1 SV=2	187050	53120	43051	28877	38639	23365		0.743762	-0.427086	0.392328	0.406351	0	Ars2
sp|Q9V9S8-3|HEMH_DROME	>sp|Q9V9S8-3|HEMH_DROME Isoform C of Ferrochelatase, mitochondrial OS=Drosophila melanogaster GN=FeCh;>sp|Q9V9S8|HEMH_DROME Ferrochelatase, mitochondrial OS=Drosophila melanogaster GN=FeCh PE=2 SV=1	602510		42458	43658	227060	153150	136190	3.99771	1.99917	0.0371872	1.42961	1	FeCH
tr|A0A0B4KI38|A0A0B4KI38_DROME	>tr|A0A0B4KI38|A0A0B4KI38_DROME Methylthioribose-1-phosphate isomerase OS=Drosophila melanogaster GN=CG11334 PE=3 SV=1;>sp|Q9V9X4|MTNA_DROME Methylthioribose-1-phosphate isomerase OS=Drosophila melanogaster GN=CG11334 PE=2 SV=1	835170	289210	291160	185390	35369		34038	0.135957	-2.87878	0.0163613	1.78618	-1	CG11334
sp|Q9VA02|DHTK1_DROME	>sp|Q9VA02|DHTK1_DROME Probable 2-oxoglutarate dehydrogenase E1 component DHKTD1 homolog, mitochondrial OS=Drosophila melanogaster GN=CG1544 PE=2 SV=2	761840		334120	28137	67318	152230	180040	0.735367	-0.443463	0.720964	0.142087	0	CG1544
sp|Q9VA37|DJ1B_DROME	>sp|Q9VA37|DJ1B_DROME Protein dj-1beta OS=Drosophila melanogaster GN=dj-1beta PE=1 SV=3;>sp|Q9VA37-2|DJ1B_DROME Isoform 2 of Protein dj-1beta OS=Drosophila melanogaster GN=dj-1beta	8976500	576030	1330600	1192400	1904000	2205100	1768500	1.89659	0.92341	0.0251327	1.59976	0	dj-1beta
tr|A4V3N7|A4V3N7_DROME	>tr|A4V3N7|A4V3N7_DROME Ceramidase, isoform B OS=Drosophila melanogaster GN=CDase PE=1 SV=1;>sp|Q9VA70|NCASE_DROME Neutral ceramidase OS=Drosophila melanogaster GN=CDase PE=1 SV=1	1045000	103190	114860	140120	441020	147720	98050	1.9175	0.939225	0.366085	0.436419	0	CDase
sp|Q9VA73-3|CMC_DROME	>sp|Q9VA73-3|CMC_DROME Isoform 3 of Calcium-binding mitochondrial carrier protein Aralar1 OS=Drosophila melanogaster GN=aralar1;>sp|Q9VA73-2|CMC_DROME Isoform 2 of Calcium-binding mitochondrial carrier protein Aralar1 OS=Drosophila melanogaster GN=aralar1;	208730	72024	45459	30762	55094		5387.1	0.611971	-0.708465	0.486214	0.313173	0	aralar1
tr|Q8IMI7|Q8IMI7_DROME	>tr|Q8IMI7|Q8IMI7_DROME Ribosomal protein S7, isoform E OS=Drosophila melanogaster GN=RpS7 PE=1 SV=2;>sp|Q9VA91|RS7_DROME 40S ribosomal protein S7 OS=Drosophila melanogaster GN=RpS7 PE=1 SV=1	106320000	18824000	16735000	14646000	19795000	18986000	17338000	1.1178	0.160658	0.233566	0.631591	0	RpS7
sp|Q9VAH9|INT11_DROME	>sp|Q9VAH9|INT11_DROME Integrator complex subunit 11 OS=Drosophila melanogaster GN=IntS11 PE=1 SV=1	66122	38764		27358					-10			-1	IntS11
tr|D1FYT3|D1FYT3_DROME	>tr|D1FYT3|D1FYT3_DROME GEO09079p1 OS=Drosophila melanogaster GN=Obp99b PE=1 SV=1;>sp|Q9VAI6|OB99B_DROME General odorant-binding protein 99b OS=Drosophila melanogaster GN=Obp99b PE=2 SV=1	194260000	19532000	13895000	12323000	48678000	47860000	51973000	3.24614	1.69873	0.000170624	3.76796	1	Obp99b
tr|D1FYH5|D1FYH5_DROME	>tr|D1FYH5|D1FYH5_DROME Odorant-binding protein 99a OS=Drosophila melanogaster GN=Obp99a PE=4 SV=1;>sp|Q9VAJ4|OB99A_DROME General odorant-binding protein 99a OS=Drosophila melanogaster GN=Obp99a PE=2 SV=2	23220000	4116400	3038100	3032600	3463900	4708600	4860400	1.27935	0.355415	0.171738	0.765134	0	Obp99a
sp|Q9VAK8|DIE_DROME	>sp|Q9VAK8|DIE_DROME Protein Diedel OS=Drosophila melanogaster GN=Diedel PE=1 SV=1	6820200				2781400	2123300	1915500		10			1	Diedel
sp|Q9VAN0|SERC_DROME	>sp|Q9VAN0|SERC_DROME Probable phosphoserine aminotransferase OS=Drosophila melanogaster GN=CG11899 PE=2 SV=1	30184000	4531100	5052000	3938600	5861000	5636800	5164400	1.23226	0.301302	0.0517197	1.28634	0	CG11899
tr|A0A0B4K7Y7|A0A0B4K7Y7_DROME	>tr|A0A0B4K7Y7|A0A0B4K7Y7_DROME La related protein, isoform G OS=Drosophila melanogaster GN=larp PE=1 SV=1;>sp|Q9VAW5|LARP_DROME La-related protein 1 OS=Drosophila melanogaster GN=larp PE=1 SV=5;>sp|Q9VAW5-1|LARP_DROME Isoform C of La-related protein 1 OS=	2215600	200390	228080	106620	529010	569580	581890	3.14056	1.65102	0.000677653	3.16899	1	larp
sp|Q9VBP9-2|NPL4_DROME	>sp|Q9VBP9-2|NPL4_DROME Isoform B of Nuclear protein localization protein 4 homolog OS=Drosophila melanogaster GN=Npl4;>sp|Q9VBP9|NPL4_DROME Nuclear protein localization protein 4 homolog OS=Drosophila melanogaster GN=Npl4 PE=1 SV=3	1565900	252290	329810	253500	337090	225950	167250	0.873971	-0.194343	0.564857	0.248061	0	Npl4
sp|Q9VBX1|NEMF_DROME	>sp|Q9VBX1|NEMF_DROME Nuclear export mediator factor NEMF homolog OS=Drosophila melanogaster GN=Clbn PE=1 SV=2	428180	115290	109480	103000		29575	70840	0.459537	-1.12175	0.0347617	1.4589	-1	Clbn
tr|H1UUH6|H1UUH6_DROME	>tr|H1UUH6|H1UUH6_DROME CG6364, isoform C OS=Drosophila melanogaster GN=CG6364-RA PE=1 SV=1;>sp|Q9VC99|UCK_DROME Probable uridine-cytidine kinase OS=Drosophila melanogaster GN=CG6364 PE=3 SV=1;>tr|B7Z0P8|B7Z0P8_DROME CG6364, isoform B OS=Drosophila melanog	172300	64630	107670						-10			-1	CG6364
sp|Q9VCA5|SYFB_DROME	>sp|Q9VCA5|SYFB_DROME Phenylalanine--tRNA ligase beta subunit OS=Drosophila melanogaster GN=beta-PheRS PE=1 SV=1	3817800	694090	591980	384890	762370	741650	642850	1.28481	0.361558	0.181333	0.741522	0	beta-PheRS
tr|A0A0B4LHK4|A0A0B4LHK4_DROME	>tr|A0A0B4LHK4|A0A0B4LHK4_DROME Multiple ankyrin repeats single KH domain, isoform F OS=Drosophila melanogaster GN=mask PE=4 SV=1;>tr|A0A0B4KHZ8|A0A0B4KHZ8_DROME Multiple ankyrin repeats single KH domain, isoform D OS=Drosophila melanogaster GN=mask PE=4 S	29948				8439.8	5152	16356		10			1	mask
sp|Q9VCC0|CHRD1_DROME	>sp|Q9VCC0|CHRD1_DROME Cysteine and histidine-rich domain-containing protein OS=Drosophila melanogaster GN=CHORD PE=1 SV=1	782380	116270	123110	119380	152250	142440	128940	1.18082	0.239786	0.0372451	1.42893	0	CHORD
sp|Q9VCK0|EI3D1_DROME	>sp|Q9VCK0|EI3D1_DROME Eukaryotic translation initiation factor 3 subunit D-1 OS=Drosophila melanogaster GN=eIF-3p66 PE=1 SV=1	8730000	912010	1280000	1858400	2178700	1535900	965080	1.15536	0.208342	0.662505	0.178811	0	eIF-3p66
sp|Q9VCX3|RM45_DROME	>sp|Q9VCX3|RM45_DROME Probable 39S ribosomal protein L45, mitochondrial OS=Drosophila melanogaster GN=mRpL45 PE=2 SV=1	214840	132100	34061	48682					-10			-1	mRpL45
sp|Q9VCY3|CSN6_DROME	>sp|Q9VCY3|CSN6_DROME COP9 signalosome complex subunit 6 OS=Drosophila melanogaster GN=CSN6 PE=1 SV=1	302170		148840	153330					-10			-1	CSN6
sp|Q9VDQ7|NAA25_DROME	>sp|Q9VDQ7|NAA25_DROME Phagocyte signaling-impaired protein OS=Drosophila melanogaster GN=psidin PE=2 SV=1	210560	41141	55860	63855	19520	14326	15861	0.309016	-1.69425	0.00559452	2.25224	-1	psidin
sp|Q9VE00|C12A4_DROME	>sp|Q9VE00|C12A4_DROME Probable cytochrome P450 12a4, mitochondrial OS=Drosophila melanogaster GN=Cyp12a4 PE=2 SV=2	47709	22751	24958						-10			-1	Cyp12a4
sp|Q9VE11|U488_DROME	>sp|Q9VE11|U488_DROME UPF0488 protein CG14286 OS=Drosophila melanogaster GN=CG14286 PE=2 SV=1	38846			38846					-10			-1	CG14286
sp|Q9VEG6|PERC_DROME	>sp|Q9VEG6|PERC_DROME Chorion peroxidase OS=Drosophila melanogaster GN=Pxt PE=2 SV=3	1199400	127780	205360	81782	301360	216900	266190	1.8906	0.918841	0.0475566	1.32279	0	Pxt
sp|Q9VEN1|FLNA_DROME	>sp|Q9VEN1|FLNA_DROME Filamin-A OS=Drosophila melanogaster GN=cher PE=1 SV=2;>tr|A0A0B4JCY6|A0A0B4JCY6_DROME Cheerio, isoform I OS=Drosophila melanogaster GN=cher PE=1 SV=1;>tr|Q7KSF4|Q7KSF4_DROME Cheerio, isoform G OS=Drosophila melanogaster GN=cher PE=1	4630100	235260	305790	363370	1519600	998110	1208000	4.11945	2.04245	0.00381197	2.41885	1	cher
sp|Q9VER6|MODSP_DROME	>sp|Q9VER6|MODSP_DROME Modular serine protease OS=Drosophila melanogaster GN=modSP PE=1 SV=2	553030	71343	58343	22701	239270	161380		3.94374	1.97957	0.022777	1.6425	1	modSP
sp|Q9VEX6|ATD3A_DROME	>sp|Q9VEX6|ATD3A_DROME ATPase family AAA domain-containing protein 3A homolog OS=Drosophila melanogaster GN=bor PE=1 SV=2	620250	64562	62264	70006	268350	78220	76850	2.15117	1.10512	0.301017	0.521409	0	bor
sp|Q9VF26|SPNE_DROME	>sp|Q9VF26|SPNE_DROME Probable ATP-dependent RNA helicase spindle-E OS=Drosophila melanogaster GN=spn-E PE=2 SV=1	6392.5	6392.5							-10			-1	spn-E
sp|Q9VF87|CYFIP_DROME	>sp|Q9VF87|CYFIP_DROME Cytoplasmic FMR1-interacting protein OS=Drosophila melanogaster GN=Sra-1 PE=1 SV=1	46394		9315.4	9640.9		12957	14481	1.44743	0.533498	0.0321394	1.49296	0	Sra-1
sp|Q9VFC2|SP88E_DROME	>sp|Q9VFC2|SP88E_DROME Serine protease inhibitor 88Ea OS=Drosophila melanogaster GN=Spn88Ea PE=2 SV=1	35222000	3978300	4251700	3825700	9244200	7150100	6771900	1.9216	0.942306	0.00893903	2.04871	0	Spn88Ea
sp|Q9VFC8|GYS_DROME	>sp|Q9VFC8|GYS_DROME Glycogen [starch] synthase OS=Drosophila melanogaster GN=GlyS PE=1 SV=2;>tr|A0A0B4KHJ5|A0A0B4KHJ5_DROME Glycogen [starch] synthase OS=Drosophila melanogaster GN=GlyS PE=1 SV=1;>sp|Q9VFC8-2|GYS_DROME Isoform B of Glycogen [starch] synth	14178000	1969100	1731100	1421800	3727700	2596400	2732300	1.76814	0.82223	0.0282842	1.54846	0	GlyS
sp|Q9VFE4|RS5B_DROME	>sp|Q9VFE4|RS5B_DROME 40S ribosomal protein S5b OS=Drosophila melanogaster GN=RpS5b PE=2 SV=1;>tr|A0A0B4K683|A0A0B4K683_DROME Ribosomal protein S5b, isoform B OS=Drosophila melanogaster GN=RpS5b PE=3 SV=1;>tr|X2JKU5|X2JKU5_DROME Ribosomal protein S5a, isof	9136700	1551600	949390	1302100	1514300	1436600	2382700	1.40244	0.487938	0.218645	0.66026	0	RpS5b
sp|Q9VFM9|TWF_DROME	>sp|Q9VFM9|TWF_DROME Twinfilin OS=Drosophila melanogaster GN=twf PE=1 SV=1	1163600	84248			339220	444800	295370	4.27068	2.09447	0.08986	1.04643	0	twf
sp|Q9VFS5-2|PP4R3_DROME	>sp|Q9VFS5-2|PP4R3_DROME Isoform D of Serine/threonine-protein phosphatase 4 regulatory subunit 3 OS=Drosophila melanogaster GN=flfl;>tr|A0A0C4DHE6|A0A0C4DHE6_DROME Falafel, isoform E OS=Drosophila melanogaster GN=flfl PE=1 SV=1;>sp|Q9VFS5|PP4R3_DROME Seri	151330	103240	48090						-10			-1	flfl
sp|Q9VG08|YELF2_DROME	>sp|Q9VG08|YELF2_DROME L-dopachrome tautomerase yellow-f2 OS=Drosophila melanogaster GN=yellow-f2 PE=1 SV=2	4835800	218080	157410	206420	2121100	1380900	751910	7.31025	2.86992	0.0365758	1.43681	1	yellow-f2
tr|A0A0B4KGZ1|A0A0B4KGZ1_DROME	>tr|A0A0B4KGZ1|A0A0B4KGZ1_DROME Yellow-f, isoform C OS=Drosophila melanogaster GN=yellow-f PE=1 SV=1;>tr|A0A0B4KHA3|A0A0B4KHA3_DROME Yellow-f, isoform B OS=Drosophila melanogaster GN=yellow-f PE=1 SV=1;>sp|Q9VG09|YELF_DROME L-dopachrome tautomerase yellow-	3681400		29469	37394	1672500	838920	1103100	36.0391	5.17149	0.0345393	1.46169	1	yellow-f
sp|Q9VGE8|TACHY_DROME	>sp|Q9VGE8|TACHY_DROME Tachykinins OS=Drosophila melanogaster GN=Tk PE=1 SV=1;>tr|A0A0B4KFT7|A0A0B4KFT7_DROME Tachykinin, isoform B OS=Drosophila melanogaster GN=Tk PE=4 SV=1	6895600	1898600	2399600	303810		1163000	1130600	0.747586	-0.419688	0.667473	0.175566	0	Tk
sp|Q9VGG5|CAD87_DROME	>sp|Q9VGG5|CAD87_DROME Cadherin-87A OS=Drosophila melanogaster GN=Cad87A PE=1 SV=4	2246500	192960	220100	198820		816290	818300	4.00713	2.00257	1.16019e-05	4.93547	1	Cad87A
sp|Q9VGK7|ELP1_DROME	>sp|Q9VGK7|ELP1_DROME Putative elongator complex protein 1 OS=Drosophila melanogaster GN=Elp1 PE=1 SV=2;>tr|A0A0B4KGU0|A0A0B4KGU0_DROME Elongator complex protein 1 OS=Drosophila melanogaster GN=Elp1 PE=1 SV=1;>tr|A0A0B4KFR6|A0A0B4KFR6_DROME Elongator compl	248030	76861	80053	57267	11933	11775	10140	0.158035	-2.66169	0.00109342	2.96121	-1	Elp1
sp|Q9VGP6|PFD3_DROME	>sp|Q9VGP6|PFD3_DROME Prefoldin subunit 3 OS=Drosophila melanogaster GN=mgr PE=1 SV=3	899600	244620	138190		193090	170370	153330	0.899994	-0.152013	0.682021	0.166203	0	mgr
tr|A0A126GUT1|A0A126GUT1_DROME	>tr|A0A126GUT1|A0A126GUT1_DROME Translationally controlled tumor protein ortholog, isoform B OS=Drosophila melanogaster GN=Tctp PE=3 SV=1;>sp|Q9VGS2|TCTP_DROME Translationally-controlled tumor protein homolog OS=Drosophila melanogaster GN=Tctp PE=1 SV=1	12965000	1529000	2550700	1341800	5260100	1216700	1066800	1.39142	0.476561	0.64541	0.190164	0	NA
sp|Q9VGW6|MCM5_DROME	>sp|Q9VGW6|MCM5_DROME DNA replication licensing factor Mcm5 OS=Drosophila melanogaster GN=Mcm5 PE=1 SV=1	307430	87214	41963	91702	57936	10287	18327	0.391843	-1.35165	0.10758	0.968269	0	Mcm5
sp|Q9VH07|RUVB1_DROME	>sp|Q9VH07|RUVB1_DROME RuvB-like helicase 1 OS=Drosophila melanogaster GN=pont PE=1 SV=1	1336100	236390	216790	260760	64075	242400	315720	0.871495	-0.198436	0.70724	0.150433	0	pont
tr|F0JAI1|F0JAI1_DROME	>tr|F0JAI1|F0JAI1_DROME Arginine methyltransferase 4, isoform B OS=Drosophila melanogaster GN=Art4 PE=1 SV=1;>sp|Q9VH48|CARM1_DROME Probable histone-arginine methyltransferase CARMER OS=Drosophila melanogaster GN=Art4 PE=1 SV=1	440290	101210	119270	106990	112820			1.03356	0.0476226	0.763657	0.117102	0	Art4
tr|A0A0C4DHE8|A0A0C4DHE8_DROME	>tr|A0A0C4DHE8|A0A0C4DHE8_DROME GEO09636p1 OS=Drosophila melanogaster GN=RpS29 PE=1 SV=1;>sp|Q9VH69|RS29_DROME 40S ribosomal protein S29 OS=Drosophila melanogaster GN=RpS29 PE=1 SV=1	21598000	5360300	6216200	4374000	5647100			1.06212	0.0869429	0.785709	0.104738	0	RpS29
tr|A0A0B4K6D2|A0A0B4K6D2_DROME	>tr|A0A0B4K6D2|A0A0B4K6D2_DROME Uncharacterized protein, isoform B OS=Drosophila melanogaster GN=CG16817 PE=1 SV=1;>sp|Q9VH95|YC17_DROME Uncharacterized protein CG16817 OS=Drosophila melanogaster GN=CG16817 PE=1 SV=1	5159800	1445700	1463300	1157200	630720	286740	176150	0.268951	-1.89458	0.00422951	2.37371	-1	CG16817
sp|Q9VHN6|RM19_DROME	>sp|Q9VHN6|RM19_DROME 39S ribosomal protein L19, mitochondrial OS=Drosophila melanogaster GN=mRpL19 PE=2 SV=1	916470		50190		488170	178220	199890	5.75334	2.5244	0.35488	0.449918	0	mRpL19
sp|Q9VHP0|DDX3_DROME	>sp|Q9VHP0|DDX3_DROME ATP-dependent RNA helicase bel OS=Drosophila melanogaster GN=bel PE=1 SV=1;>tr|A0A0B4KGU4|A0A0B4KGU4_DROME Belle, isoform B OS=Drosophila melanogaster GN=bel PE=4 SV=1	7945900	984270	1062900	630370	1876300	1574500	1817400	1.96755	0.976402	0.0059555	2.22508	0	bel
sp|Q9VHR8-2|DPP3_DROME	>sp|Q9VHR8-2|DPP3_DROME Isoform 2 of Dipeptidyl peptidase 3 OS=Drosophila melanogaster GN=DppIII;>sp|Q9VHR8|DPP3_DROME Dipeptidyl peptidase 3 OS=Drosophila melanogaster GN=DppIII PE=2 SV=2	10972000	2298600	1213900	839070	2125700	2266600	2227800	1.52131	0.605317	0.160551	0.794387	0	DppIII
sp|Q9VHS8|IF4A3_DROME	>sp|Q9VHS8|IF4A3_DROME Eukaryotic initiation factor 4A-III OS=Drosophila melanogaster GN=eIF4AIII PE=1 SV=1	503630	237170	86852	86277	42178		51160	0.341232	-1.55118	0.259171	0.586413	0	eIF4AIII
tr|A0A0B4LGT4|A0A0B4LGT4_DROME	>tr|A0A0B4LGT4|A0A0B4LGT4_DROME GTPase indispensable for equal segregation of chromosomes, isoform B OS=Drosophila melanogaster GN=Gie PE=3 SV=1;>sp|Q9VHV5|ARL8_DROME ADP-ribosylation factor-like protein 8 OS=Drosophila melanogaster GN=Gie PE=1 SV=1	134850	60388			74465			1.23311	0.302301			0	Gie
sp|Q9VI10|SMD2_DROME	>sp|Q9VI10|SMD2_DROME Probable small nuclear ribonucleoprotein Sm D2 OS=Drosophila melanogaster GN=SmD2 PE=1 SV=1	3946100	396540	354510	462480	1403600	678720	650180	2.2517	1.17101	0.111273	0.95361	0	SmD2
sp|Q9VI75|PICAL_DROME	>sp|Q9VI75|PICAL_DROME Phosphatidylinositol-binding clathrin assembly protein LAP OS=Drosophila melanogaster GN=lap PE=1 SV=3;>tr|A0A0B4K603|A0A0B4K603_DROME Like-AP180, isoform E OS=Drosophila melanogaster GN=lap PE=1 SV=1;>tr|A0A0B4K6V2|A0A0B4K6V2_DROME	118560					118560			10			1	lap
tr|M9PDA6|M9PDA6_DROME	>tr|M9PDA6|M9PDA6_DROME CG2614, isoform C OS=Drosophila melanogaster GN=CG2614 PE=4 SV=1;>sp|Q9VIK9|MET13_DROME Methyltransferase-like protein 13 OS=Drosophila melanogaster GN=CG2614 PE=2 SV=1	104710		25268		79439			3.14386	1.65254			0	CG2614
tr|X2JAI2|X2JAI2_DROME	>tr|X2JAI2|X2JAI2_DROME Arp2/3 complex 34 kDa subunit OS=Drosophila melanogaster GN=Arpc2 PE=3 SV=1;>sp|Q9VIM5|ARPC2_DROME Actin-related protein 2/3 complex subunit 2 OS=Drosophila melanogaster GN=Arpc2 PE=2 SV=2	2273200	618540	509840	472960	245990	214110	211740	0.419549	-1.25309	0.00234584	2.6297	-1	Arpc2
sp|Q9VIP0|NESD_DROME	>sp|Q9VIP0|NESD_DROME Protein nessun dorma OS=Drosophila melanogaster GN=nesd PE=1 SV=1	232280	13309	63970	32157		59207	63639	1.68381	0.751726	0.283827	0.546946	0	nesd
sp|Q9VIV2|SWM_DROME	>sp|Q9VIV2|SWM_DROME Zinc finger protein swm OS=Drosophila melanogaster GN=swm PE=1 SV=1;>tr|M9PDF2|M9PDF2_DROME Second mitotic wave missing, isoform C OS=Drosophila melanogaster GN=swm PE=1 SV=1	21365				9574.4		11790		10			1	swm
tr|M9PD65|M9PD65_DROME	>tr|M9PD65|M9PD65_DROME Ran GTPase activating protein, isoform C OS=Drosophila melanogaster GN=RanGAP PE=1 SV=1;>tr|M9PBD9|M9PBD9_DROME Ran GTPase activating protein, isoform B OS=Drosophila melanogaster GN=RanGAP PE=1 SV=1;>sp|Q9VIW3|RAGP1_DROME Ran GTPas	27781			27781					-10			-1	RanGAP
tr|X2J935|X2J935_DROME	>tr|X2J935|X2J935_DROME Nedd8, isoform B OS=Drosophila melanogaster GN=Nedd8 PE=4 SV=1;>sp|Q9VJ33|NEDD8_DROME NEDD8 OS=Drosophila melanogaster GN=Nedd8 PE=1 SV=1	15591000	2292900	2173300	869260	4008100	2492600	3755200	1.92221	0.94277	0.0661795	1.17928	0	Nedd8
sp|Q9VJC7|EFTS_DROME	>sp|Q9VJC7|EFTS_DROME Elongation factor Ts, mitochondrial OS=Drosophila melanogaster GN=CG6412 PE=2 SV=1	696370	30735	86362	174560	62402	133110	209210	1.38766	0.472659	0.561391	0.250735	0	CG6412
tr|M9PBC9|M9PBC9_DROME	>tr|M9PBC9|M9PBC9_DROME Cytoplasmic linker protein 190, isoform T OS=Drosophila melanogaster GN=CLIP-190 PE=1 SV=1;>tr|M9PDB4|M9PDB4_DROME Cytoplasmic linker protein 190, isoform Q OS=Drosophila melanogaster GN=CLIP-190 PE=1 SV=1;>tr|X2JAQ4|X2JAQ4_DROME Cy	439340				154240	162270	122830		10			1	CLIP-190
sp|Q9VJG0|XPP_DROME	>sp|Q9VJG0|XPP_DROME Xaa-Pro aminopeptidase ApepP OS=Drosophila melanogaster GN=ApepP PE=1 SV=1	8657300	1486600	1112200	1192100	1598600	1583800	1684100	1.28373	0.360344	0.0385182	1.41433	0	ApepP
tr|X2JE06|X2JE06_DROME	>tr|X2JE06|X2JE06_DROME GEO07624p1 OS=Drosophila melanogaster GN=RpL24 PE=1 SV=1;>sp|Q9VJY6|RL24_DROME 60S ribosomal protein L24 OS=Drosophila melanogaster GN=RpL24 PE=1 SV=1	74586000	13818000	11542000	9222500	17177000	10162000	12664000	1.15674	0.210066	0.500763	0.300367	0	RpL24
tr|E1JHG8|E1JHG8_DROME	>tr|E1JHG8|E1JHG8_DROME CG6153, isoform C OS=Drosophila melanogaster GN=CG6153 PE=4 SV=2;>sp|Q9VK68|PITH1_DROME PITH domain-containing protein CG6153 OS=Drosophila melanogaster GN=CG6153 PE=2 SV=1	463850	45262	44537	46027	328030			7.24523	2.85703	9.25827e-06	5.03347	1	CG6153
sp|Q9VK89|TRM1_DROME	>sp|Q9VK89|TRM1_DROME Probable tRNA (guanine(26)-N(2))-dimethyltransferase OS=Drosophila melanogaster GN=CG6388 PE=2 SV=1	314670		27477	43185	70327	98043	75642	2.30215	1.20298	0.0342405	1.46546	1	CG6388
sp|Q9VKD3|NFS1_DROME	>sp|Q9VKD3|NFS1_DROME Probable cysteine desulfurase, mitochondrial OS=Drosophila melanogaster GN=CG12264 PE=2 SV=1	2076300	328940	304560	263950	741980	213690	223130	1.3135	0.393415	0.621536	0.206534	0	CG12264
sp|Q9VKJ0|HGD_DROME	>sp|Q9VKJ0|HGD_DROME Homogentisate 1,2-dioxygenase OS=Drosophila melanogaster GN=hgo PE=2 SV=3	166260	36098	39830	90335					-10			-1	hgo
sp|Q9VKJ9|C2D1_DROME	>sp|Q9VKJ9|C2D1_DROME Coiled-coil and C2 domain-containing protein 1-like OS=Drosophila melanogaster GN=l(2)gd1 PE=2 SV=1;>tr|M9NEZ0|M9NEZ0_DROME Lethal (2) giant discs 1, isoform B OS=Drosophila melanogaster GN=l(2)gd1 PE=4 SV=1	17149			17149					-10			-1	l(2)gd1
tr|X2J7U0|X2J7U0_DROME	>tr|X2J7U0|X2J7U0_DROME Piwi OS=Drosophila melanogaster GN=piwi PE=1 SV=1;>sp|Q9VKM1|PIWI_DROME Protein piwi OS=Drosophila melanogaster GN=piwi PE=1 SV=1	2517400	329750	259940	328940	658030	427870	512880	1.7404	0.799416	0.0332074	1.47876	0	piwi
tr|M9PB96|M9PB96_DROME	>tr|M9PB96|M9PB96_DROME Ribosome biogenesis protein WDR12 homolog OS=Drosophila melanogaster GN=CG6724 PE=3 SV=1;>sp|Q9VKQ3|WDR12_DROME Ribosome biogenesis protein WDR12 homolog OS=Drosophila melanogaster GN=CG6724 PE=2 SV=1	1261300	310650	260810	118690	240450	175550	155150	0.827574	-0.27304	0.563092	0.249421	0	CG6724
tr|M9PB90|M9PB90_DROME	>tr|M9PB90|M9PB90_DROME Cullin-associated and neddylation-dissociated 1, isoform B OS=Drosophila melanogaster GN=Cand1 PE=1 SV=1;>sp|Q9VKY2|CAND1_DROME Cullin-associated NEDD8-dissociated protein 1 OS=Drosophila melanogaster GN=Cand1 PE=2 SV=1	366350	71510	78384	44217	41438	62002	68804	0.887348	-0.172428	0.612462	0.212921	0	Cand1
sp|Q9VL18|EF1D_DROME	>sp|Q9VL18|EF1D_DROME Probable elongation factor 1-delta OS=Drosophila melanogaster GN=eEF1delta PE=1 SV=1;>sp|Q9VL18-2|EF1D_DROME Isoform A of Probable elongation factor 1-delta OS=Drosophila melanogaster GN=eEF1delta	6126800	330520	338480	458350	1418400	1937700	1643500	4.43483	2.14888	0.00116255	2.93459	1	eEF1delta
tr|X2J5E8|X2J5E8_DROME	>tr|X2J5E8|X2J5E8_DROME Peptidylprolyl isomerase OS=Drosophila melanogaster GN=FKBP59 PE=4 SV=1;>sp|Q9VL78|FKB59_DROME FK506-binding protein 59 OS=Drosophila melanogaster GN=FKBP59 PE=1 SV=1	30542000	4658900	4498400	3988900	6483100	4965500	5947600	1.32329	0.404126	0.0440158	1.35639	0	FKBP59
tr|M9PCE8|M9PCE8_DROME	>tr|M9PCE8|M9PCE8_DROME Angiotensin-converting enzyme-related, isoform B OS=Drosophila melanogaster GN=Acer PE=3 SV=1;>sp|Q9VLJ6|ACER_DROME Angiotensin-converting enzyme-related protein OS=Drosophila melanogaster GN=Acer PE=1 SV=1	10768000	1203900	1141400	993150	2648100	1981000	2800600	2.22549	1.15413	0.00625786	2.20357	1	Acer
sp|Q9VLM8|SYAC_DROME	>sp|Q9VLM8|SYAC_DROME Alanine--tRNA ligase, cytoplasmic OS=Drosophila melanogaster GN=Aats-ala PE=2 SV=1	12497000	1919000	1951800	1695200	2331000	2509200	2090600	1.2452	0.316381	0.0353978	1.45102	0	Aats-ala
sp|Q9VLS1|KPBB_DROME	>sp|Q9VLS1|KPBB_DROME Probable phosphorylase b kinase regulatory subunit beta OS=Drosophila melanogaster GN=CG8475 PE=2 SV=2;>tr|M9PCI5|M9PCI5_DROME CG8475, isoform C OS=Drosophila melanogaster GN=CG8475 PE=4 SV=1;>sp|Q9VLS1-2|KPBB_DROME Isoform B of Proba	336030	96919	104770	90766	28217	15355		0.223481	-2.16178	0.00176036	2.7544	-1	CG8475
sp|Q9VLS9|LACB2_DROME	>sp|Q9VLS9|LACB2_DROME Beta-lactamase-like protein 2 homolog OS=Drosophila melanogaster GN=CG12375 PE=2 SV=1	1608500	255400		309180	372170	348020	323680	1.23262	0.30173	0.0930545	1.03126	0	CG12375
tr|M9PB68|M9PB68_DROME	>tr|M9PB68|M9PB68_DROME Purity of essence, isoform B OS=Drosophila melanogaster GN=poe PE=4 SV=1;>sp|Q9VLT5|POE_DROME Protein purity of essence OS=Drosophila melanogaster GN=poe PE=1 SV=1;>sp|Q9VLT5-2|POE_DROME Isoform B of Protein purity of essence OS=Dro	715360	67801	111210	91458	190230	142860	111800	1.64488	0.717985	0.0892359	1.04946	0	poe
sp|Q9VLU4|SP28D_DROME	>sp|Q9VLU4|SP28D_DROME Serine protease inhibitor 28Dc OS=Drosophila melanogaster GN=Spn28Dc PE=2 SV=2	170700				66883	51166	52650		10			1	Spn28Dc
sp|Q9VM33|EFGM_DROME	>sp|Q9VM33|EFGM_DROME Elongation factor G, mitochondrial OS=Drosophila melanogaster GN=ico PE=2 SV=2	1514400	111660	99054	159320	452420	333590	358340	3.09255	1.6288	0.00313309	2.50403	1	ico
tr|M9PEY6|M9PEY6_DROME	>tr|M9PEY6|M9PEY6_DROME Rat1, isoform B OS=Drosophila melanogaster GN=Rat1 PE=1 SV=1;>sp|Q9VM71|XRN2_DROME 5-3 exoribonuclease 2 homolog OS=Drosophila melanogaster GN=Rat1 PE=1 SV=2	446960	54719	48247	45318	189740	54346	54595	2.01425	1.01024	0.329335	0.482362	0	Rat1
tr|M9PB52|M9PB52_DROME	>tr|M9PB52|M9PB52_DROME Galactose-1-phosphate uridylyltransferase OS=Drosophila melanogaster GN=Galt PE=3 SV=1;>sp|Q9VMA2|GALT_DROME Probable galactose-1-phosphate uridylyltransferase OS=Drosophila melanogaster GN=Galt PE=2 SV=2	16918000	3207600	3628300	3236400	2519500	2082900	2243500	0.679676	-0.557081	0.00446092	2.35058	0	Galt
tr|X2J9P9|X2J9P9_DROME	>tr|X2J9P9|X2J9P9_DROME Cup, isoform C OS=Drosophila melanogaster GN=cup PE=4 SV=1;>sp|Q9VMA3|CUP_DROME Protein cup OS=Drosophila melanogaster GN=cup PE=1 SV=3	2194600	221220	183480	133560	723770	492820	439730	3.07717	1.62161	0.0148041	1.82962	1	cup
tr|X2J8X6|X2J8X6_DROME	>tr|X2J8X6|X2J8X6_DROME Kynurenine formamidase OS=Drosophila melanogaster GN=KFase PE=3 SV=1;>sp|Q9VMC9|KFA_DROME Kynurenine formamidase OS=Drosophila melanogaster GN=KFase PE=1 SV=1	172410		17640	108430			46342	0.735179	-0.443833	0.866818	0.062072	0	KFase
tr|M9NCR7|M9NCR7_DROME	>tr|M9NCR7|M9NCR7_DROME Glucosamine-6-phosphate isomerase OS=Drosophila melanogaster GN=Oscillin PE=3 SV=1;>tr|M9ND31|M9ND31_DROME Glucosamine-6-phosphate isomerase OS=Drosophila melanogaster GN=Oscillin PE=3 SV=1;>tr|M9NE92|M9NE92_DROME Glucosamine-6-phos	6005300	1387700	1163300	626900	1324700	538840	963920	0.889726	-0.168567	0.733708	0.134477	0	Oscillin
sp|Q9VMQ5|COQ6_DROME	>sp|Q9VMQ5|COQ6_DROME Ubiquinone biosynthesis monooxygenase COQ6, mitochondrial OS=Drosophila melanogaster GN=Coq6 PE=2 SV=1	877090	30179	83233	99495	311000	87559	265620	3.11957	1.64135	0.102612	0.9888	0	CG7277
tr|X2J4N6|X2J4N6_DROME	>tr|X2J4N6|X2J4N6_DROME CG6907, isoform B OS=Drosophila melanogaster GN=CG6907 PE=4 SV=1;>sp|Q9VMQ7|ELP4_DROME Putative elongator complex protein 4 OS=Drosophila melanogaster GN=CG6907 PE=1 SV=1	115160		57003	58160					-10			-1	CG6907
tr|M9ND27|M9ND27_DROME	>tr|M9ND27|M9ND27_DROME Turandot M, isoform B OS=Drosophila melanogaster GN=TotM PE=1 SV=1;>sp|Q9VMR8|TOTM_DROME Protein Turandot M OS=Drosophila melanogaster GN=TotM PE=2 SV=2	6930600	676710	617760	380050	2734500	1137300	1384300	3.13887	1.65025	0.0771583	1.11262	0	TotM
tr|M9MRF2|M9MRF2_DROME	>tr|M9MRF2|M9MRF2_DROME GEO09637p1 OS=Drosophila melanogaster GN=RpL37A PE=2 SV=1;>sp|Q9VMU4|RL37A_DROME 60S ribosomal protein L37a OS=Drosophila melanogaster GN=RpL37A PE=1 SV=3	5563500	937680	932220	657110	2369800	446340	220330	1.20161	0.264964	0.817244	0.0876482	0	RpL37A
sp|Q9VMW9|GMDS_DROME	>sp|Q9VMW9|GMDS_DROME GDP-mannose 4,6 dehydratase OS=Drosophila melanogaster GN=Gmd PE=1 SV=2	1239900	235250	301980	138790	202150	188180	173590	0.834177	-0.261575	0.480463	0.31834	0	Gmd
sp|Q9VMY1|RM24_DROME	>sp|Q9VMY1|RM24_DROME Probable 39S ribosomal protein L24, mitochondrial OS=Drosophila melanogaster GN=mRpL24 PE=2 SV=1	651460	128000	125820	97097	180500		120040	1.28466	0.36139	0.289452	0.538423	0	mRpL24
sp|Q9VMY9|GUAD_DROME	>sp|Q9VMY9|GUAD_DROME Guanine deaminase OS=Drosophila melanogaster GN=DhpD PE=1 SV=1	2402700	520940	1007200	483270	37469	308670	45164	0.194542	-2.36185	0.0473407	1.32477	-1	DhpD
sp|Q9VN14|CONT_DROME	>sp|Q9VN14|CONT_DROME Contactin OS=Drosophila melanogaster GN=Cont PE=1 SV=2	86863	15932	15603	8477.8	25671	11525	9653.1	1.17085	0.22756	0.705421	0.151551	0	Cont
sp|Q9VN25-2|EIF3A_DROME	>sp|Q9VN25-2|EIF3A_DROME Isoform B of Eukaryotic translation initiation factor 3 subunit A OS=Drosophila melanogaster GN=eIF3-S10;>sp|Q9VN25|EIF3A_DROME Eukaryotic translation initiation factor 3 subunit A OS=Drosophila melanogaster GN=eIF3-S10 PE=1 SV=1	28474000	3368800	3182400	2713600	6486300	6210600	6512600	2.07339	1.05199	0.000108129	3.96606	1	eIF3-S10
sp|Q9VN50|EI3F1_DROME	>sp|Q9VN50|EI3F1_DROME Eukaryotic translation initiation factor 3 subunit F-1 OS=Drosophila melanogaster GN=eIF3-S5-1 PE=2 SV=1	8078800	1856600	2663700	1879800	821580	36988	820170	0.262299	-1.93072	0.0134044	1.87275	-1	CG9769
sp|Q9VN93-2|CPR1_DROME	>sp|Q9VN93-2|CPR1_DROME Isoform B of Putative cysteine proteinase CG12163 OS=Drosophila melanogaster GN=CG12163;>sp|Q9VN93|CPR1_DROME Putative cysteine proteinase CG12163 OS=Drosophila melanogaster GN=CG12163 PE=2 SV=2	2648100	213590	333540	313290	840060	511880	435680	2.07761	1.05493	0.075414	1.12255	0	CG12163
sp|Q9VN95|ENOPH_DROME	>sp|Q9VN95|ENOPH_DROME Enolase-phosphatase E1 OS=Drosophila melanogaster GN=CG12173 PE=2 SV=2	283850	86102	86243	111510					-10			-1	CG12173
sp|Q9VNA5|PSB4_DROME	>sp|Q9VNA5|PSB4_DROME Proteasome subunit beta type-4 OS=Drosophila melanogaster GN=Prosbeta7 PE=2 SV=1	9258000	1418100	1391500	1303300	2255100	880960	2009100	1.25098	0.32306	0.463053	0.33437	0	Prosbeta7
sp|Q9VND8|RHEB_DROME	>sp|Q9VND8|RHEB_DROME GTP-binding protein Rheb homolog OS=Drosophila melanogaster GN=Rheb PE=2 SV=1	3282200	716480	654370	442520	849470	454390	164980	0.810006	-0.303996	0.621564	0.206514	0	Rheb
sp|Q9VNE2|PKRA_DROME	>sp|Q9VNE2|PKRA_DROME Protein krasavietz OS=Drosophila melanogaster GN=kra PE=1 SV=1	215200	31578	23123	66871		40053	53576	1.15523	0.208179	0.750033	0.124919	0	kra
sp|Q9VNE9|RL13A_DROME	>sp|Q9VNE9|RL13A_DROME 60S ribosomal protein L13a OS=Drosophila melanogaster GN=RpL13A PE=1 SV=1	61818000	5672900	7842700	5904100	15734000	12578000	14087000	2.1833	1.12651	0.00257044	2.58999	1	RpL13A
sp|Q9VNI3|HPF1_DROME	>sp|Q9VNI3|HPF1_DROME Histone PARylation factor 1-like OS=Drosophila melanogaster GN=CG1218 PE=1 SV=2	536930	54028	63654	90421	137140	115070	76614	1.5801	0.660018	0.124707	0.904108	0	CG1218
sp|Q9VNT5|TRXR2_DROME	>sp|Q9VNT5|TRXR2_DROME Thioredoxin reductase 2, mitochondrial OS=Drosophila melanogaster GN=Trxr-2 PE=2 SV=1	246920	164860		82063					-10			-1	Trxr-2
tr|B7Z098|B7Z098_DROME	>tr|B7Z098|B7Z098_DROME CG7414, isoform D OS=Drosophila melanogaster GN=anon-WO0118547.243 PE=1 SV=2;>sp|Q9VNX8|EIF2A_DROME Eukaryotic translation initiation factor 2A OS=Drosophila melanogaster GN=CG7414 PE=1 SV=1;>tr|M9MS45|M9MS45_DROME CG7414, isoform C	209860	73643	72629	17601	45988			0.841896	-0.248286	0.837274	0.0771324	0	CG7414
sp|Q9VP47|TSR1_DROME	>sp|Q9VP47|TSR1_DROME Pre-rRNA-processing protein TSR1 homolog OS=Drosophila melanogaster GN=CG7338 PE=1 SV=1	703940			56681	211930	181100	254240	3.80651	1.92847	0.0642715	1.19198	0	Tsr1
tr|Q59E09|Q59E09_DROME	>tr|Q59E09|Q59E09_DROME Acetyl-coenzyme A synthetase OS=Drosophila melanogaster GN=AcCoAS PE=1 SV=2;>sp|Q9VP61|ACSA_DROME Acetyl-coenzyme A synthetase OS=Drosophila melanogaster GN=AcCoAS PE=2 SV=1;>sp|Q9VP61-2|ACSA_DROME Isoform B of Acetyl-coenzyme A syn	16364000	3249200	3461100	2643000	3088600	1989400	1932800	0.749554	-0.415896	0.15702	0.804046	0	AcCoAS
tr|M9PD27|M9PD27_DROME	>tr|M9PD27|M9PD27_DROME Eukaryotic release factor 1, isoform H OS=Drosophila melanogaster GN=eRF1 PE=1 SV=1;>sp|Q9VPH7|ERF1_DROME Eukaryotic peptide chain release factor subunit 1 OS=Drosophila melanogaster GN=eRF1 PE=1 SV=2;>tr|M9PFR9|M9PFR9_DROME Eukaryo	1849300	491270		475910	196140	326240	359750	0.608043	-0.717756	0.0609574	1.21497	0	eRF1
sp|Q9VPP5|RNH2A_DROME	>sp|Q9VPP5|RNH2A_DROME Ribonuclease H2 subunit A OS=Drosophila melanogaster GN=CG13690 PE=2 SV=1	20403			20403					-10			-1	CG13690
sp|Q9VPQ2|DJSHV_DROME	>sp|Q9VPQ2|DJSHV_DROME DnaJ homolog shv OS=Drosophila melanogaster GN=shv PE=1 SV=1	73371	18693	22141	32537					-10			-1	CG4164
tr|M9PB12|M9PB12_DROME	>tr|M9PB12|M9PB12_DROME CG9886, isoform B OS=Drosophila melanogaster GN=CG9886 PE=4 SV=1;>sp|Q9VQC4|GLCTK_DROME Glycerate kinase OS=Drosophila melanogaster GN=Glyctk PE=2 SV=1	77178			25421	51757			2.03599	1.02573			0	CG9886
tr|M9PEF6|M9PEF6_DROME	>tr|M9PEF6|M9PEF6_DROME CG3714, isoform H OS=Drosophila melanogaster GN=CG3714 PE=4 SV=1;>sp|Q9VQX4-2|PNCB_DROME Isoform 2 of Nicotinate phosphoribosyltransferase OS=Drosophila melanogaster GN=CG3714;>tr|M9PC31|M9PC31_DROME CG3714, isoform G OS=Drosophila	373120	93309	93496	59257	22192	48666	56197	0.516354	-0.953569	0.0611402	1.21367	0	CG3714
sp|Q9VQZ6|ELP3_DROME	>sp|Q9VQZ6|ELP3_DROME Probable elongator complex protein 3 OS=Drosophila melanogaster GN=Elp3 PE=2 SV=1	493210	59918	50821	33439	151790	110060	87183	2.42085	1.27551	0.0288427	1.53996	1	Elp3
tr|X2JGE9|X2JGE9_DROME	>tr|X2JGE9|X2JGE9_DROME Lethal (1) G0196, isoform N OS=Drosophila melanogaster GN=l(1)G0196 PE=3 SV=1;>sp|Q9VR59-3|VIP1_DROME Isoform G of Inositol hexakisphosphate and diphosphoinositol-pentakisphosphate kinase OS=Drosophila melanogaster GN=l(1)G0196;>tr|	121680	32329	28320	6352.8	31358		23323	1.22417	0.291802	0.67575	0.170214	0	l(1)G0196
tr|B6IDQ5|B6IDQ5_DROME	>tr|B6IDQ5|B6IDQ5_DROME CG4603, isoform C OS=Drosophila melanogaster GN=CG4603-RA PE=1 SV=1;>sp|Q9VRJ9|OTU1_DROME Ubiquitin thioesterase OTU1 OS=Drosophila melanogaster GN=CG4603 PE=2 SV=1;>tr|M9PED6|M9PED6_DROME CG4603, isoform B OS=Drosophila melanogaste	3300200	157330	150920	45130	1317200	752390	877250	8.33901	3.05988	0.00783542	2.10594	1	CG4603
tr|M9PHM6|M9PHM6_DROME	>tr|M9PHM6|M9PHM6_DROME Ribosomal protein L18, isoform B OS=Drosophila melanogaster GN=RpL18 PE=4 SV=1;>sp|Q9VS34|RL18_DROME 60S ribosomal protein L18 OS=Drosophila melanogaster GN=RpL18 PE=1 SV=1	180890000	12053000	7105800	9656000	55551000	43788000	52731000	5.2775	2.39985	0.000424812	3.3718	1	RpL18
sp|Q9VSA3|ACADM_DROME	>sp|Q9VSA3|ACADM_DROME Probable medium-chain specific acyl-CoA dehydrogenase, mitochondrial OS=Drosophila melanogaster GN=CG12262 PE=2 SV=1	103420000	13129000	12939000	11402000	26887000	17058000	22000000	1.75994	0.815527	0.0303644	1.51764	0	CG12262
tr|M9PBW0|M9PBW0_DROME	>tr|M9PBW0|M9PBW0_DROME Ubiquitin conjugating enzyme E2M, isoform B OS=Drosophila melanogaster GN=UbcE2M PE=3 SV=1;>sp|Q9VSF3|UBC12_DROME Nedd8-conjugating enzyme Ubc12 OS=Drosophila melanogaster GN=Ubc12 PE=1 SV=1	1066100	204300	190250	208800	256570		206140	1.15035	0.202076	0.230076	0.638129	0	UbcE2M
sp|Q9VSS2|SRP68_DROME	>sp|Q9VSS2|SRP68_DROME Signal recognition particle subunit SRP68 OS=Drosophila melanogaster GN=Srp68 PE=2 SV=1	529780	89272	29878	66599	160330	93573	90128	1.85213	0.889184	0.139467	0.855527	0	Srp68
tr|M9PEN1|M9PEN1_DROME	>tr|M9PEN1|M9PEN1_DROME Alpha-tubulin N-acetyltransferase OS=Drosophila melanogaster GN=Dmel\CG3967 PE=3 SV=1;>sp|Q9VSY4-2|ATAT1_DROME Isoform 2 of Alpha-tubulin N-acetyltransferase 1 OS=Drosophila melanogaster GN=CG3967;>sp|Q9VSY4|ATAT1_DROME Alpha-tubuli	123460				53704		69758		10			1	CG3967
tr|M9PEU5|M9PEU5_DROME	>tr|M9PEU5|M9PEU5_DROME NEDD8-activating enzyme E1 regulatory subunit OS=Drosophila melanogaster GN=APP-BP1 PE=3 SV=1;>sp|Q9VTE9|ULA1_DROME Nedd8-activating enzyme E1 regulatory subunit OS=Drosophila melanogaster GN=APP-BP1 PE=1 SV=1	33211		33211						-10			-1	APP-BP1
sp|Q9VTF9|UFD1_DROME	>sp|Q9VTF9|UFD1_DROME Ubiquitin fusion degradation protein 1 homolog OS=Drosophila melanogaster GN=Ufd1-like PE=2 SV=1	238000	165450	72547						-10			-1	Ufd1-like
sp|Q9VTJ4|FUCO_DROME	>sp|Q9VTJ4|FUCO_DROME Putative alpha-L-fucosidase OS=Drosophila melanogaster GN=Fuca PE=2 SV=2	76733		43861	32872					-10			-1	Fuca
sp|Q9VTP4|R10AB_DROME	>sp|Q9VTP4|R10AB_DROME 60S ribosomal protein L10a-2 OS=Drosophila melanogaster GN=RpL10Ab PE=1 SV=2	14383000	2025600	1914800	1482400	3966600	1695900	3298000	1.65238	0.724541	0.164412	0.784066	0	RpL10Ab
tr|F0JAN9|F0JAN9_DROME	>tr|F0JAN9|F0JAN9_DROME RE19853p OS=Drosophila melanogaster GN=RhoGAP68F PE=1 SV=1;>tr|M9PEY9|M9PEY9_DROME Rho GTPase activating protein at 68F, isoform E OS=Drosophila melanogaster GN=RhoGAP68F PE=1 SV=1;>tr|M9PC96|M9PC96_DROME Rho GTPase activating prote	68766					36296	32469		10			1	RhoGAP68F
sp|Q9VTU4|EIF3L_DROME	>sp|Q9VTU4|EIF3L_DROME Eukaryotic translation initiation factor 3 subunit L OS=Drosophila melanogaster GN=CG5642 PE=2 SV=1	11600000	920590	3375200	2526400	542290	1981100	2254400	0.700331	-0.513891	0.488572	0.311072	0	CG5642
sp|Q9VTZ6|PMM_DROME	>sp|Q9VTZ6|PMM_DROME Probable phosphomannomutase OS=Drosophila melanogaster GN=CG10688 PE=2 SV=1	1904000	679540	185790	165810	94125	346860	431890	0.846515	-0.240393	0.801373	0.0961651	0	CG10688
sp|Q9VU02|SMD1_DROME	>sp|Q9VU02|SMD1_DROME Probable small nuclear ribonucleoprotein Sm D1 OS=Drosophila melanogaster GN=SmD1 PE=1 SV=1	456020			456020					-10			-1	SmD1
tr|X2JB24|X2JB24_DROME	>tr|X2JB24|X2JB24_DROME GEO09628p1 OS=Drosophila melanogaster GN=Nplp2 PE=2 SV=1;>sp|Q9VU58|NPLP2_DROME Neuropeptide-like 2 OS=Drosophila melanogaster GN=Nplp2 PE=1 SV=1;>tr|A0A0S0WH10|A0A0S0WH10_DROME Neuropeptide-like 2, isoform C OS=Drosophila melanogas	517320000	26961000	24493000	27583000	145970000	147540000	144770000	5.54525	2.47125	6.85751e-08	7.16383	1	Nplp2
sp|Q9VU68|WDR1_DROME	>sp|Q9VU68|WDR1_DROME Actin-interacting protein 1 OS=Drosophila melanogaster GN=flr PE=2 SV=1;>sp|Q9VU68-2|WDR1_DROME Isoform B of Actin-interacting protein 1 OS=Drosophila melanogaster GN=flr	25850000	2882100	4058300	3799800	5293000	4725200	5092100	1.40689	0.492511	0.0208328	1.68125	0	flr
sp|Q9VU84|DBNL_DROME	>sp|Q9VU84|DBNL_DROME Drebrin-like protein OS=Drosophila melanogaster GN=Abp1 PE=1 SV=1	882360		56061	110480	270730	205170	239920	2.86544	1.51876	0.0163562	1.78632	1	Abp1
sp|Q9VU87|VPS36_DROME	>sp|Q9VU87|VPS36_DROME Vacuolar protein-sorting-associated protein 36 OS=Drosophila melanogaster GN=Vps36 PE=2 SV=2	31184			31184					-10			-1	Vps36
sp|Q9VUJ0|RM39_DROME	>sp|Q9VUJ0|RM39_DROME 39S ribosomal protein L39, mitochondrial OS=Drosophila melanogaster GN=mRpL39 PE=1 SV=2	279960	50889	47840	48547	66590	66092		1.35136	0.434413	0.000736859	3.13262	0	mRpL39
sp|Q9VUL1-2|PYRG_DROME	>sp|Q9VUL1-2|PYRG_DROME Isoform 2 of CTP synthase OS=Drosophila melanogaster GN=CTPsyn;>tr|X2JCY2|X2JCY2_DROME CTP synthase OS=Drosophila melanogaster GN=CTPsyn PE=3 SV=1;>sp|Q9VUL1|PYRG_DROME CTP synthase OS=Drosophila melanogaster GN=CTPsyn PE=1 SV=2	1259300	51335	32194		461130	304570	410100	9.38437	3.23026	0.00999444	2.00024	1	CTPsyn
sp|Q9VUQ5|AGO2_DROME	>sp|Q9VUQ5|AGO2_DROME Protein argonaute-2 OS=Drosophila melanogaster GN=AGO2 PE=1 SV=3;>sp|Q9VUQ5-2|AGO2_DROME Isoform C of Protein argonaute-2 OS=Drosophila melanogaster GN=AGO2;>tr|M9PFK7|M9PFK7_DROME Argonaute 2, isoform E OS=Drosophila melanogaster GN=	760780	136800	75476	68151	216040	130530	133780	1.71292	0.776461	0.133275	0.875253	0	AGO2
tr|Q8T060|Q8T060_DROME	>tr|Q8T060|Q8T060_DROME AaRS-interacting multifunctional protein 2, isoform B OS=Drosophila melanogaster GN=AIMP2 PE=1 SV=3;>sp|Q9VUR3|AIMP2_DROME Probable aminoacyl tRNA synthase complex-interacting multifunctional protein 2 OS=Drosophila melanogaster GN=	1098900	337650	233680	294140	144520	42301	46636	0.269746	-1.89033	0.0094173	2.02607	-1	CG12304
sp|Q9VUV9|U520_DROME	>sp|Q9VUV9|U520_DROME Putative U5 small nuclear ribonucleoprotein 200 kDa helicase OS=Drosophila melanogaster GN=l(3)72Ab PE=2 SV=4	61526	20127	29229	12170					-10			-1	l(3)72Ab
sp|Q9VUY9|PGM_DROME	>sp|Q9VUY9|PGM_DROME Phosphoglucomutase OS=Drosophila melanogaster GN=Pgm PE=1 SV=1	50714000	11019000	10661000	8282200	8383300	5897500	6471400	0.692613	-0.529879	0.0546455	1.26245	0	Pgm
sp|Q9VV74|SMN_DROME	>sp|Q9VV74|SMN_DROME Survival motor neuron protein OS=Drosophila melanogaster GN=Smn PE=1 SV=1	865730	198000	165620	191450		144570	166090	0.839516	-0.252371	0.143424	0.843379	0	Smn
tr|M9PFS8|M9PFS8_DROME	>tr|M9PFS8|M9PFS8_DROME CG9705, isoform C OS=Drosophila melanogaster GN=Dmel\CG9705 PE=2 SV=1;>sp|Q9VVA0|Y9705_DROME Cold shock domain-containing protein CG9705 OS=Drosophila melanogaster GN=CG9705 PE=1 SV=1	471520		320910		150610			0.469322	-1.09135			0	CG9705
sp|Q9VVI2|EDC3_DROME	>sp|Q9VVI2|EDC3_DROME Enhancer of mRNA-decapping protein 3 OS=Drosophila melanogaster GN=Edc3 PE=1 SV=1	37152	8778.5			8990.8		19382	1.61604	0.692462	0.655518	0.183416	0	Edc3
tr|M9PCV9|M9PCV9_DROME	>tr|M9PCV9|M9PCV9_DROME Vacuolar protein sorting 60, isoform B OS=Drosophila melanogaster GN=Vps60 PE=4 SV=1;>sp|Q9VVI9|CHMP5_DROME Charged multivesicular body protein 5 OS=Drosophila melanogaster GN=Vps60 PE=1 SV=2	297400				89460	92206	115730		10			1	Vps60
sp|Q9VVU5|CSN1_DROME	>sp|Q9VVU5|CSN1_DROME COP9 signalosome complex subunit 1b OS=Drosophila melanogaster GN=CSN1b PE=2 SV=1	385100	164710	138560	81824					-10			-1	CSN1b
tr|M9PCY7|M9PCY7_DROME	>tr|M9PCY7|M9PCY7_DROME Glycogen binding subunit 76A, isoform B OS=Drosophila melanogaster GN=Gbs-76A PE=4 SV=1;>sp|Q9VVY3|GBS76_DROME Glycogen-binding subunit 76A OS=Drosophila melanogaster GN=Gbs-76A PE=1 SV=1	423100	91722	39065		182090	65197	45031	1.49005	0.575357	0.622206	0.206066	0	Gbs-76A
tr|X2JGV8|X2JGV8_DROME	>tr|X2JGV8|X2JGV8_DROME CG9231, isoform B OS=Drosophila melanogaster GN=Dmel\CG9231 PE=4 SV=1;>sp|Q9VW12|U389_DROME UPF0389 protein CG9231 OS=Drosophila melanogaster GN=CG9231 PE=1 SV=1	755420				755420				10			1	CG9231
sp|Q9VW26|OAT_DROME	>sp|Q9VW26|OAT_DROME Ornithine aminotransferase, mitochondrial OS=Drosophila melanogaster GN=Oat PE=2 SV=1	2943900	826450	655940	512160	346530	382380	220480	0.475992	-1.07099	0.0279393	1.55378	-1	Oat
tr|M9PD09|M9PD09_DROME	>tr|M9PD09|M9PD09_DROME GEO08974p1 OS=Drosophila melanogaster GN=Pfdn6 PE=2 SV=1;>sp|Q9VW56|PFD6_DROME Probable prefoldin subunit 6 OS=Drosophila melanogaster GN=Pfdn6 PE=2 SV=1	310170			62338		130620	117200	1.98771	0.991109	0.118768	0.9253	0	CG7770
tr|E1JI22|E1JI22_DROME	>tr|E1JI22|E1JI22_DROME Clathrin light chain OS=Drosophila melanogaster GN=Clc PE=1 SV=1;>sp|Q9VWA1|CLC_DROME Clathrin light chain OS=Drosophila melanogaster GN=Clc PE=2 SV=1	1624700	176880	109380	89335	708550	193320	347280	3.32579	1.7337	0.133446	0.874694	0	Clc
sp|Q9VWE0|DOME_DROME	>sp|Q9VWE0|DOME_DROME Cytokine receptor OS=Drosophila melanogaster GN=dome PE=1 SV=1	11216			6652.5			4564	0.686058	-0.543598			0	dome
tr|M9NEQ9|M9NEQ9_DROME	>tr|M9NEQ9|M9NEQ9_DROME Ribosomal protein S10b, isoform D OS=Drosophila melanogaster GN=RpS10b PE=1 SV=1;>sp|Q9VWG3|RS10B_DROME 40S ribosomal protein S10b OS=Drosophila melanogaster GN=RpS10b PE=1 SV=2	16557000	904070	1093900	844270	5607300	3824200	4283400	4.82538	2.27064	0.00256203	2.59142	1	RpS10b
sp|Q9VWH4-2|IDH3A_DROME	>sp|Q9VWH4-2|IDH3A_DROME Isoform A of Probable isocitrate dehydrogenase [NAD] subunit alpha, mitochondrial OS=Drosophila melanogaster GN=l(1)G0156;>sp|Q9VWH4|IDH3A_DROME Probable isocitrate dehydrogenase [NAD] subunit alpha, mitochondrial OS=Drosophila mel	43145000	7796300	5107900	4631100	10002000	8087700	7520700	1.46051	0.546468	0.0954777	1.0201	0	l(1)G0156
tr|X2JL49|X2JL49_DROME	>tr|X2JL49|X2JL49_DROME CG7332, isoform B OS=Drosophila melanogaster GN=CG7332 PE=4 SV=1;>sp|Q9VWN5|MINY3_DROME Ubiquitin carboxyl-terminal hydrolase MINDY-3 homolog OS=Drosophila melanogaster GN=mindy3 PE=1 SV=1	61033			61033					-10			-1	CG7332
sp|Q9VWP4|SUOX_DROME	>sp|Q9VWP4|SUOX_DROME Probable sulfite oxidase, mitochondrial OS=Drosophila melanogaster GN=CG7280 PE=2 SV=1	233510	32203	27186	28379	76784	31551	37405	1.66051	0.73163	0.247498	0.606428	0	CG7280
sp|Q9VWU1|PSH_DROME	>sp|Q9VWU1|PSH_DROME Serine protease persephone OS=Drosophila melanogaster GN=psh PE=1 SV=1	851210	365430	346310	139480					-10			-1	psh
tr|M9NFA7|M9NFA7_DROME	>tr|M9NFA7|M9NFA7_DROME Ubr1 ubiquitin ligase, isoform B OS=Drosophila melanogaster GN=Ubr1 PE=4 SV=1;>sp|Q9VX91|UBR1_DROME E3 ubiquitin-protein ligase UBR1 OS=Drosophila melanogaster GN=Ubr1 PE=2 SV=2	74742	14528	7827.4	5814.4		35140	11432	2.47989	1.31028	0.238454	0.622596	0	Ubr1
sp|Q9VX98|DENR_DROME	>sp|Q9VX98|DENR_DROME Density-regulated protein homolog OS=Drosophila melanogaster GN=DENR PE=1 SV=3	1759300	67084	80044	107650	882950	176480	445130	5.90538	2.56203	0.113488	0.945048	0	DENR
sp|Q9VXB0|NECAP_DROME	>sp|Q9VXB0|NECAP_DROME NECAP-like protein CG9132 OS=Drosophila melanogaster GN=CG9132 PE=2 SV=1;>tr|M9NE07|M9NE07_DROME CG9132, isoform C OS=Drosophila melanogaster GN=CG9132 PE=4 SV=1	4843000	567040	487810	434180	1149800	1032900	1171300	2.25247	1.17151	0.00042303	3.37363	1	CG9132
tr|M9NEL1|M9NEL1_DROME	>tr|M9NEL1|M9NEL1_DROME Serine/threonine-protein phosphatase OS=Drosophila melanogaster GN=CanA-14F PE=3 SV=1;>sp|Q9VXF1|PP2B3_DROME Serine/threonine-protein phosphatase 2B catalytic subunit 3 OS=Drosophila melanogaster GN=CanA-14F PE=1 SV=4	1074400	219460	163560	318820	192980	90538	89037	0.530826	-0.913689	0.12626	0.898735	0	CanA-14F
tr|X2JFD6|X2JFD6_DROME	>tr|X2JFD6|X2JFD6_DROME Peroxisomal multifunctional enzyme type 2, isoform B OS=Drosophila melanogaster GN=Mfe2 PE=4 SV=1;>sp|Q9VXJ0|DHB4_DROME Peroxisomal multifunctional enzyme type 2 OS=Drosophila melanogaster GN=Mfe2 PE=1 SV=1	2035500	236250	300000	154190	687670	314890	342470	1.94808	0.96205	0.161259	0.792477	0	Mfe2
tr|M9PJP0|M9PJP0_DROME	>tr|M9PJP0|M9PJP0_DROME Nipsnap, isoform F OS=Drosophila melanogaster GN=Nipsnap PE=4 SV=2;>sp|Q9VXK0|NIPSN_DROME Protein NipSnap OS=Drosophila melanogaster GN=Nipsnap PE=2 SV=2	725920	278930	269040	177940					-10			-1	Nipsnap
sp|Q9VXK6|IF5_DROME	>sp|Q9VXK6|IF5_DROME Eukaryotic translation initiation factor 5 OS=Drosophila melanogaster GN=eIF5 PE=1 SV=1	1130700	93903	163200	262760	193060	225090	192660	1.17494	0.232592	0.578263	0.237875	0	eIF5
sp|Q9VXN2-2|SUN_DROME	>sp|Q9VXN2-2|SUN_DROME Isoform B of Protein stunted OS=Drosophila melanogaster GN=sun;>sp|Q9VXN2|SUN_DROME Protein stunted OS=Drosophila melanogaster GN=sun PE=1 SV=1	632750		632750						-10			-1	sun
sp|Q9VXN4|SYRC_DROME	>sp|Q9VXN4|SYRC_DROME Probable arginine--tRNA ligase, cytoplasmic OS=Drosophila melanogaster GN=ArgRS PE=2 SV=1	418900	49664	69316	34010	112220	84315	69379	1.73811	0.797522	0.0806255	1.09353	0	Aats-arg
tr|B4F5C5|B4F5C5_DROME	>tr|B4F5C5|B4F5C5_DROME CG7860, isoform B OS=Drosophila melanogaster GN=CG7860 PE=1 SV=1;>sp|Q9VXT7|ASGL1_DROME Probable isoaspartyl peptidase/L-asparaginase CG7860 OS=Drosophila melanogaster GN=CG7860 PE=2 SV=1	140490					63780	76713		10			1	CG7860
tr|M9PH59|M9PH59_DROME	>tr|M9PH59|M9PH59_DROME Ribosomal protein L37 OS=Drosophila melanogaster GN=RpL37a PE=2 SV=1;>sp|Q9VXX8|RL371_DROME Probable 60S ribosomal protein L37-A OS=Drosophila melanogaster GN=RpL37a PE=1 SV=1	10232000	2029500	1869500	1944600	2068600	1155800	1164000	0.750975	-0.413162	0.188581	0.724503	0	RpL37a
tr|Q0KHS6|Q0KHS6_DROME	>tr|Q0KHS6|Q0KHS6_DROME Lipid storage droplet-2, isoform D OS=Drosophila melanogaster GN=Lsd-2 PE=1 SV=2;>tr|X2JKC1|X2JKC1_DROME Lipid storage droplet-2, isoform E OS=Drosophila melanogaster GN=Lsd-2 PE=1 SV=1;>tr|Q0KHS7|Q0KHS7_DROME Lipid storage droplet-	314870		34565		68564	123560	88178	2.70314	1.43464	0.20888	0.680103	0	Lsd-2
sp|Q9VY28|RT25_DROME	>sp|Q9VY28|RT25_DROME Probable 28S ribosomal protein S25, mitochondrial OS=Drosophila melanogaster GN=mRpS25 PE=1 SV=1	304550			73856	88718	80653	61321	1.04118	0.0582184	0.868861	0.0610495	0	mRpS25
tr|M9PEI9|M9PEI9_DROME	>tr|M9PEI9|M9PEI9_DROME Probable methylthioribulose-1-phosphate dehydratase OS=Drosophila melanogaster GN=CG11134 PE=3 SV=1;>sp|Q9VY93|MTNB_DROME Probable methylthioribulose-1-phosphate dehydratase OS=Drosophila melanogaster GN=CG11134 PE=2 SV=1	2256800	594620	432420	344920	381390	139010	364400	0.644917	-0.632815	0.203775	0.69085	0	CG11134
tr|C5WLN1|C5WLN1_DROME	>tr|C5WLN1|C5WLN1_DROME Glutamine-dependent NAD(+) synthetase OS=Drosophila melanogaster GN=CG9940-RA PE=2 SV=1;>sp|Q9VYA0|NADE_DROME Probable glutamine-dependent NAD(+) synthetase OS=Drosophila melanogaster GN=CG9940 PE=1 SV=1	211610	8617.6	32278	47046		68163	55504	2.10936	1.07681	0.121906	0.913974	0	CG9940
tr|X2JES4|X2JES4_DROME	>tr|X2JES4|X2JES4_DROME 2-methoxy-6-polyprenyl-1,4-benzoquinol methylase, mitochondrial OS=Drosophila melanogaster GN=Coq5 PE=3 SV=1;>sp|Q9VYF8|COQ5_DROME 2-methoxy-6-polyprenyl-1,4-benzoquinol methylase, mitochondrial OS=Drosophila melanogaster GN=Coq5 PE	579140				327390	145890	105860		10			1	CG2453
tr|X2JER0|X2JER0_DROME	>tr|X2JER0|X2JER0_DROME CG2200, isoform B OS=Drosophila melanogaster GN=CG2200 PE=4 SV=1;>sp|Q9VYH3|PEPE_DROME Probable alpha-aspartyl dipeptidase OS=Drosophila melanogaster GN=CG2200 PE=2 SV=1	687330	41408	81319		339780	49009	175820	3.06702	1.61684	0.331194	0.479917	0	CG2200
tr|X2JEX7|X2JEX7_DROME	>tr|X2JEX7|X2JEX7_DROME Ubiquitin-specific protease 7, isoform C OS=Drosophila melanogaster GN=Usp7 PE=3 SV=1;>sp|Q9VYQ8|UBP7_DROME Ubiquitin carboxyl-terminal hydrolase 7 OS=Drosophila melanogaster GN=Usp7 PE=1 SV=1	1437600	326440	407010	214950	194910	133990	160320	0.515837	-0.955012	0.0587701	1.23084	0	Usp7
sp|Q9VYR0|LS12A_DROME	>sp|Q9VYR0|LS12A_DROME Protein LSM12 homolog A OS=Drosophila melanogaster GN=CG15735 PE=2 SV=2	676760			180260		245250	251240	1.37715	0.461685	0.0484824	1.31442	0	CG15735
tr|X2JBC1|X2JBC1_DROME	>tr|X2JBC1|X2JBC1_DROME Upf1, isoform B OS=Drosophila melanogaster GN=Upf1 PE=4 SV=1;>sp|Q9VYS3|RENT1_DROME Regulator of nonsense transcripts 1 homolog OS=Drosophila melanogaster GN=Upf1 PE=1 SV=2	179950	27318	42979	29460	33060	23770	23362	0.803873	-0.31496	0.326399	0.486251	0	Upf1
sp|Q9VYV3-2|TXND5_DROME	>sp|Q9VYV3-2|TXND5_DROME Isoform D of Thioredoxin domain-containing protein 5 homolog OS=Drosophila melanogaster GN=prtp;>sp|Q9VYV3|TXND5_DROME Thioredoxin domain-containing protein 5 homolog OS=Drosophila melanogaster GN=prtp PE=1 SV=2	429380	57311		63703		128850	179520	2.54822	1.34949	0.0669319	1.17437	0	prtp
sp|Q9VYY3|UBA5_DROME	>sp|Q9VYY3|UBA5_DROME Ubiquitin-like modifier-activating enzyme 5 OS=Drosophila melanogaster GN=Uba5 PE=2 SV=1	773820		68520	43858	372030	160090	129330	3.92396	1.97231	0.195323	0.709247	0	CG1749
tr|A4V4A5|A4V4A5_DROME	>tr|A4V4A5|A4V4A5_DROME GTP-binding nuclear protein OS=Drosophila melanogaster GN=Ran PE=1 SV=1;>sp|Q9VZ23|RAN_DROME GTP-binding nuclear protein Ran OS=Drosophila melanogaster GN=Ran PE=1 SV=1	82065000	14163000	12163000	12009000	17277000	13599000	12854000	1.14073	0.189961	0.305888	0.514437	0	Ran
tr|X2JJD6|X2JJD6_DROME	>tr|X2JJD6|X2JJD6_DROME CG2145, isoform B OS=Drosophila melanogaster GN=CG2145 PE=4 SV=1;>sp|Q9VZ49|ENDOU_DROME Poly(U)-specific endoribonuclease homolog OS=Drosophila melanogaster GN=CG2145 PE=2 SV=1	2411400	258040	212660	132110	496670	417810	894080	3.00022	1.58507	0.0572375	1.24232	0	CG2145
sp|Q9VZ64|6PGL_DROME	>sp|Q9VZ64|6PGL_DROME Probable 6-phosphogluconolactonase OS=Drosophila melanogaster GN=CG17333 PE=2 SV=1	806350	235280	219170	176770		75648	99482	0.41617	-1.26475	0.0147926	1.82995	-1	CG17333
sp|Q9VZD8|THUM1_DROME	>sp|Q9VZD8|THUM1_DROME THUMP domain-containing protein 1 homolog OS=Drosophila melanogaster GN=CG15014 PE=1 SV=2	399030	63314	50664	77448	24210	88767	94622	1.08449	0.117013	0.832237	0.0797529	0	CG15014
sp|Q9VZE6|BRX1_DROME	>sp|Q9VZE6|BRX1_DROME Ribosome biogenesis protein BRX1 homolog OS=Drosophila melanogaster GN=CG11583 PE=2 SV=2	6241200	6064000			54740	38497	83905	0.00973736	-6.68225	1.9574e-05	4.70832	-1	CG11583
sp|Q9VZI3|UN112_DROME	>sp|Q9VZI3|UN112_DROME Unc-112-related protein OS=Drosophila melanogaster GN=Fit1 PE=1 SV=1	1402500	192840	99594	102330	407220	295630	304890	2.55277	1.35206	0.0122567	1.91163	1	Fit1
tr|D1Z3A1|D1Z3A1_DROME	>tr|D1Z3A1|D1Z3A1_DROME MIP15344p OS=Drosophila melanogaster GN=RpL28 PE=1 SV=1;>sp|Q9VZS5|RL28_DROME 60S ribosomal protein L28 OS=Drosophila melanogaster GN=RpL28 PE=1 SV=1	172250000	12186000	10970000	13438000	42229000	49198000	44233000	3.70717	1.89032	0.000112849	3.9475	1	RpL28
tr|M9PGX7|M9PGX7_DROME	>tr|M9PGX7|M9PGX7_DROME Succinyl-CoA:3-ketoacid-coenzyme A transferase OS=Drosophila melanogaster GN=SCOT PE=1 SV=1;>sp|Q9W058-2|SCOT_DROME Isoform B of Succinyl-CoA:3-ketoacid-coenzyme A transferase, mitochondrial OS=Drosophila melanogaster GN=SCOT;>sp|Q9	2915800	407600	619250	429710	494510	450480	514300	1.00187	0.00270148	0.990218	0.00426929	0	SCOT
tr|Q8IRH4|Q8IRH4_DROME	>tr|Q8IRH4|Q8IRH4_DROME Protein tyrosine phosphatase 61F, isoform D OS=Drosophila melanogaster GN=Ptp61F PE=1 SV=1;>sp|Q9W0G1-3|PTP61_DROME Isoform C of Tyrosine-protein phosphatase non-receptor type 61F OS=Drosophila melanogaster GN=Ptp61F;>sp|Q9W0G1-2|PT	90845	90845							-10			-1	Ptp61F
tr|M9ND19|M9ND19_DROME	>tr|M9ND19|M9ND19_DROME UDP-galactose 4-epimerase, isoform B OS=Drosophila melanogaster GN=Gale PE=1 SV=1;>sp|Q9W0P5|GALE_DROME UDP-glucose 4-epimerase OS=Drosophila melanogaster GN=Gale PE=1 SV=1	7877500	1635700	1213700	1098500	1731500	985620	1212500	0.99537	-0.00669564	0.983358	0.00728825	0	Gale
sp|Q9W0P8|MED14_DROME	>sp|Q9W0P8|MED14_DROME Mediator of RNA polymerase II transcription subunit 14 OS=Drosophila melanogaster GN=MED14 PE=1 SV=4;>sp|Q9W0P8-3|MED14_DROME Isoform 2 of Mediator of RNA polymerase II transcription subunit 14 OS=Drosophila melanogaster GN=MED14	14382		6283.2	8099.2					-10			-1	MED14
tr|E1JHV7|E1JHV7_DROME	>tr|E1JHV7|E1JHV7_DROME Enhancer of bithorax, isoform F OS=Drosophila melanogaster GN=E(bx) PE=1 SV=1;>sp|Q9W0T1-4|NU301_DROME Isoform D of Nucleosome-remodeling factor subunit NURF301 OS=Drosophila melanogaster GN=E(bx);>sp|Q9W0T1-3|NU301_DROME Isoform C	25382					14546	10837		10			1	E(bx)
sp|Q9W0Y1|TINA1_DROME	>sp|Q9W0Y1|TINA1_DROME Troponin C-akin-1 protein OS=Drosophila melanogaster GN=Tina-1 PE=2 SV=1	1408500	272890	448820	393190	293630			0.790107	-0.339881	0.530884	0.275	0	Tina-1
sp|Q9W141|ATPK_DROME	>sp|Q9W141|ATPK_DROME Putative ATP synthase subunit f, mitochondrial OS=Drosophila melanogaster GN=CG4692 PE=3 SV=1;>sp|Q9W141-2|ATPK_DROME Isoform B of Putative ATP synthase subunit f, mitochondrial OS=Drosophila melanogaster GN=CG4692	27370000	3383600	3164300	2871100	6827600	5825700	5297700	1.90583	0.930418	0.00383993	2.41568	0	ATPsynF
sp|Q9W197|5NT3B_DROME	>sp|Q9W197|5NT3B_DROME 7-methylguanosine phosphate-specific 5-nucleotidase OS=Drosophila melanogaster GN=cN-IIIB PE=1 SV=1	423290	66441	40392		122300	88706	105460	1.97483	0.981731	0.0461873	1.33548	0	cN-IIIB
tr|D5A7M1|D5A7M1_DROME	>tr|D5A7M1|D5A7M1_DROME Ejaculatory bulb protein III, isoform B OS=Drosophila melanogaster GN=EbpIII PE=1 SV=1;>sp|Q9W1C9|PEB3_DROME Ejaculatory bulb-specific protein 3 OS=Drosophila melanogaster GN=EbpIII PE=2 SV=2	30498000	391910	1512000	196520	6865000	8732800	12800000	13.52	3.75702	0.00821005	2.08565	1	EbpIII
sp|Q9W1G0|TALDO_DROME	>sp|Q9W1G0|TALDO_DROME Probable transaldolase OS=Drosophila melanogaster GN=Taldo PE=2 SV=2	4659200	1721200	935910	1332800	234050	204380	230880	0.167751	-2.57561	0.00817026	2.08776	-1	Taldo
sp|Q9W1H4|DNLI1_DROME	>sp|Q9W1H4|DNLI1_DROME DNA ligase 1 OS=Drosophila melanogaster GN=DNA-ligI PE=1 SV=2	38830	19624		19205					-10			-1	DNA-ligI
sp|Q9W1V3|FBRL_DROME	>sp|Q9W1V3|FBRL_DROME rRNA 2-O-methyltransferase fibrillarin OS=Drosophila melanogaster GN=Fib PE=2 SV=1	10375000	1584400	565000	923430	3090400	1513300	2698000	2.37621	1.24866	0.0656227	1.18295	0	Fib
sp|Q9W1X4|NU214_DROME	>sp|Q9W1X4|NU214_DROME Nuclear pore complex protein Nup214 OS=Drosophila melanogaster GN=Nup214 PE=1 SV=2	276130					14631	261500		10			1	Nup214
tr|A0A0B4LG52|A0A0B4LG52_DROME	>tr|A0A0B4LG52|A0A0B4LG52_DROME GEO08239p1 OS=Drosophila melanogaster GN=RpS16 PE=2 SV=1;>sp|Q9W237|RS16_DROME 40S ribosomal protein S16 OS=Drosophila melanogaster GN=RpS16 PE=1 SV=1	80209000	12803000	11898000	11147000	16753000	13646000	13964000	1.23753	0.307464	0.0608419	1.2158	0	RpS16
tr|A0A0B4K7L0|A0A0B4K7L0_DROME	>tr|A0A0B4K7L0|A0A0B4K7L0_DROME Rad50, isoform E OS=Drosophila melanogaster GN=rad50 PE=1 SV=1;>sp|Q9W252|RAD50_DROME DNA repair protein RAD50 OS=Drosophila melanogaster GN=rad50 PE=2 SV=4	27483	6640.4	8854.6	11988					-10			-1	rad50
sp|Q9W2D9|EIF3K_DROME	>sp|Q9W2D9|EIF3K_DROME Eukaryotic translation initiation factor 3 subunit K OS=Drosophila melanogaster GN=CG10306 PE=2 SV=1	2413200	770700	737610	497550	407290			0.60915	-0.71513	0.268282	0.571408	0	CG10306
tr|A0A0B4K8A5|A0A0B4K8A5_DROME	>tr|A0A0B4K8A5|A0A0B4K8A5_DROME Mahjong, isoform B OS=Drosophila melanogaster GN=mahj PE=4 SV=1;>sp|Q9W2F2|DCAF1_DROME Protein mahjong OS=Drosophila melanogaster GN=mahj PE=1 SV=2	465110	37478	14849	31359	101790	118530	161110	4.55787	2.18836	0.00629979	2.20067	1	mahj
sp|Q9W2M2-3|TREA_DROME	>sp|Q9W2M2-3|TREA_DROME Isoform B of Trehalase OS=Drosophila melanogaster GN=Treh;>tr|A4UZR3|A4UZR3_DROME Trehalase OS=Drosophila melanogaster GN=Treh PE=1 SV=1;>sp|Q9W2M2-2|TREA_DROME Isoform A of Trehalase OS=Drosophila melanogaster GN=Treh;>sp|Q9W2M2|TR	1775000	244610	279680	65111	317490	399730	468370	2.01152	1.00828	0.0667572	1.1755	0	Treh
sp|Q9W2N0|CAPZA_DROME	>sp|Q9W2N0|CAPZA_DROME F-actin-capping protein subunit alpha OS=Drosophila melanogaster GN=cpa PE=2 SV=1	7311200	1204900	814560	625820	1393200	1674400	1598300	1.76386	0.818735	0.0239334	1.621	0	cpa
sp|Q9W2Y3|NNRE_DROME	>sp|Q9W2Y3|NNRE_DROME NAD(P)H-hydrate epimerase OS=Drosophila melanogaster GN=CG2974 PE=2 SV=2	714370	56794	60944	59647	252340	159710	124930	3.0272	1.59798	0.0344872	1.46234	1	CG2974
tr|X2JEB6|X2JEB6_DROME	>tr|X2JEB6|X2JEB6_DROME Imaginal disc growth factor 4, isoform C OS=Drosophila melanogaster GN=Idgf4 PE=1 SV=1;>sp|Q9W303|IDGF4_DROME Chitinase-like protein Idgf4 OS=Drosophila melanogaster GN=Idgf4 PE=2 SV=1	17554000	1655300	1850500	1710900	4226000	4264000	3847400	2.36498	1.24183	8.17674e-05	4.08742	1	Idgf4
tr|X2JEM4|X2JEM4_DROME	>tr|X2JEM4|X2JEM4_DROME GEO07185p1 OS=Drosophila melanogaster GN=RpS28b PE=2 SV=1;>sp|Q9W334|RS28_DROME 40S ribosomal protein S28 OS=Drosophila melanogaster GN=RpS28b PE=1 SV=2	48591000	11907000	14743000	10854000	4921800	3217400	2948000	0.295627	-1.75815	0.00259099	2.58653	-1	RpS28b
tr|X2JJ32|X2JJ32_DROME	>tr|X2JJ32|X2JJ32_DROME CG7766, isoform I OS=Drosophila melanogaster GN=CG7766 PE=1 SV=1;>tr|B7Z134|B7Z134_DROME CG7766, isoform D OS=Drosophila melanogaster GN=CG7766 PE=1 SV=1;>sp|Q9W391|KPBA_DROME Probable phosphorylase b kinase regulatory subunit alpha	428120	101440	24498	41988	104060	72540	83587	1.54941	0.631723	0.286872	0.542312	0	CG7766
sp|Q9W3J5|SYFA_DROME	>sp|Q9W3J5|SYFA_DROME Phenylalanine--tRNA ligase alpha subunit OS=Drosophila melanogaster GN=alpha-PheRS PE=1 SV=1	5684800	1002700	1064800	682120	860470	1113100	961520	1.06745	0.0941725	0.680465	0.167194	0	alpha-PheRS
tr|A4V448|A4V448_DROME	>tr|A4V448|A4V448_DROME Glutamate-cysteine ligase catalytic subunit, isoform B OS=Drosophila melanogaster GN=Gclc PE=1 SV=1;>sp|Q9W3K5|GSH1_DROME Glutamate--cysteine ligase OS=Drosophila melanogaster GN=Gclc PE=2 SV=1	141580			66302	75274			1.13532	0.183099			0	Gclc
tr|X2JIQ5|X2JIQ5_DROME	>tr|X2JIQ5|X2JIQ5_DROME Ribosomal protein L17, isoform E OS=Drosophila melanogaster GN=RpL17 PE=3 SV=1;>sp|Q9W3W8|RL17_DROME 60S ribosomal protein L17 OS=Drosophila melanogaster GN=RpL17 PE=1 SV=1	131060000	1646700		948590	65296000	29570000	33597000	32.999	5.04435	0.0652942	1.18513	0	RpL17
sp|Q9W3Y0|ZN593_DROME	>sp|Q9W3Y0|ZN593_DROME Zinc finger protein 593 homolog OS=Drosophila melanogaster GN=CG3224 PE=2 SV=1	1097400		100210		450560	246720	299920	3.31703	1.72989	0.197542	0.70434	0	CG3224
sp|Q9W401|CISY_DROME	>sp|Q9W401|CISY_DROME Probable citrate synthase, mitochondrial OS=Drosophila melanogaster GN=kdn PE=2 SV=1;>sp|Q9W401-2|CISY_DROME Isoform B of Probable citrate synthase, mitochondrial OS=Drosophila melanogaster GN=kdn	57512000	6677100	8632900	5926800	15461000	10239000	10575000	1.70812	0.772409	0.0552208	1.2579	0	kdn
sp|Q9W415|WUHO_DROME	>sp|Q9W415|WUHO_DROME tRNA (guanine-N(7)-)-methyltransferase non-catalytic subunit wuho OS=Drosophila melanogaster GN=wuho PE=2 SV=1	1435400	314160	365270	387750	203760	72134	92370	0.345081	-1.53499	0.00735428	2.13346	-1	wuho
tr|X2JEA2|X2JEA2_DROME	>tr|X2JEA2|X2JEA2_DROME CG4666, isoform B OS=Drosophila melanogaster GN=CG4666 PE=4 SV=1;>sp|Q9W440|THEM6_DROME Protein THEM6 OS=Drosophila melanogaster GN=CG4666 PE=2 SV=1	750620	159440	122570		468610			3.32336	1.73264	0.0618534	1.20864	0	CG4666
tr|A8JUY0|A8JUY0_DROME	>tr|A8JUY0|A8JUY0_DROME RNA-binding protein 4F, isoform D OS=Drosophila melanogaster GN=Rnp4F PE=1 SV=1;>sp|Q9W4D2|RNP4F_DROME RNA-binding protein 4F OS=Drosophila melanogaster GN=Rnp4F PE=1 SV=1	535910	98441	18360	27659	189390	137540	64523	2.70977	1.43817	0.135791	0.867128	0	Rnp4F
sp|Q9W4M9|NSUN2_DROME	>sp|Q9W4M9|NSUN2_DROME tRNA (cytosine(34)-C(5))-methyltransferase OS=Drosophila melanogaster GN=Nsun2 PE=2 SV=1	1237600	286990	247190	190520	182650	147760	182490	0.707741	-0.498706	0.0802484	1.09556	0	Nsun2
sp|Q9W4P5|VA0D1_DROME	>sp|Q9W4P5|VA0D1_DROME V-type proton ATPase subunit d 1 OS=Drosophila melanogaster GN=VhaAC39-1 PE=2 SV=1	404170	268500			135670			0.505289	-0.98482			0	VhaAC39-1
sp|Q9W4X7|EI3GA_DROME	>sp|Q9W4X7|EI3GA_DROME Eukaryotic translation initiation factor 3 subunit G-A OS=Drosophila melanogaster GN=eIF3ga PE=1 SV=1	13045000	915940	697090	737550	3768400	3538500	3387200	4.54956	2.18573	2.79021e-05	4.55436	1	eIF3ga
sp|Q9W552|VPS26_DROME	>sp|Q9W552|VPS26_DROME Vacuolar protein sorting-associated protein 26 OS=Drosophila melanogaster GN=Vps26 PE=2 SV=1	526200	117580	151410	219820	37399			0.229531	-2.12324	0.172123	0.764161	0	Vps26
tr|X2JA43|X2JA43_DROME	>tr|X2JA43|X2JA43_DROME Nucleostemin ortholog 3, isoform B OS=Drosophila melanogaster GN=Ns3 PE=4 SV=1;>sp|Q9W590|LSG1_DROME Large subunit GTPase 1 homolog OS=Drosophila melanogaster GN=Ns3 PE=1 SV=1	519690	55870	28214	110440	64402	123940	136830	1.67163	0.741255	0.255955	0.591836	0	Ns3
tr|M9NGG5|M9NGG5_DROME	>tr|M9NGG5|M9NGG5_DROME Futsch, isoform F OS=Drosophila melanogaster GN=futsch PE=1 SV=1;>sp|Q9W596|FUTSC_DROME Microtubule-associated protein futsch OS=Drosophila melanogaster GN=futsch PE=1 SV=4	94377	15143	11619	15163	26436	11358	14658	1.25109	0.323187	0.498979	0.301918	0	futsch
tr|A0A0B4KED0|A0A0B4KED0_DROME	>tr|A0A0B4KED0|A0A0B4KED0_DROME GEO09618p1 OS=Drosophila melanogaster GN=RpL38 PE=2 SV=1;>sp|Q9W5N2|RL38_DROME 60S ribosomal protein L38 OS=Drosophila melanogaster GN=RpL38 PE=1 SV=1	14868000	1201800	1313400		6330100	2184900	3838100	3.27425	1.71117	0.163323	0.786952	0	RpL38
tr|R9Q794|R9Q794_DROME	>tr|R9Q794|R9Q794_DROME Ribosomal protein L5, isoform G OS=Drosophila melanogaster GN=RpL5 PE=1 SV=1;>sp|Q9W5R8|RL5_DROME 60S ribosomal protein L5 OS=Drosophila melanogaster GN=RpL5 PE=1 SV=2	190500000	15498000	17053000	14457000	52513000	44833000	46150000	3.05259	1.61003	0.000206629	3.68481	1	RpL5
tr|A4UZZ4|A4UZZ4_DROME	>tr|A4UZZ4|A4UZZ4_DROME Alpha-1,4 glucan phosphorylase OS=Drosophila melanogaster GN=GlyP PE=1 SV=1;>sp|Q9XTL9|PYG_DROME Glycogen phosphorylase OS=Drosophila melanogaster GN=GlyP PE=2 SV=2	232340000	37640000	34816000	34000000	49733000	37553000	38595000	1.18247	0.241803	0.1852	0.732359	0	GlyP
tr|H9XVM6|H9XVM6_DROME	>tr|H9XVM6|H9XVM6_DROME Crk oncogene, isoform E OS=Drosophila melanogaster GN=Crk PE=1 SV=1;>sp|Q9XYM0|CRK_DROME Adapter molecule Crk OS=Drosophila melanogaster GN=Crk PE=1 SV=1;>tr|H9XVM7|H9XVM7_DROME Crk oncogene, isoform D OS=Drosophila melanogaster GN=	1074100	287500	286820	66935	239540	93236	100070	0.674998	-0.567044	0.471806	0.326236	0	Crk
sp|Q9XYN7|PSB3_DROME	>sp|Q9XYN7|PSB3_DROME Proteasome subunit beta type-3 OS=Drosophila melanogaster GN=Prosbeta3 PE=1 SV=1	8338300	1418100	3075900	1995900	298340	793030	757050	0.284815	-1.8119	0.0389268	1.40975	-1	Prosbeta3
tr|X2JG40|X2JG40_DROME	>tr|X2JG40|X2JG40_DROME Gamma-tubulin complex component OS=Drosophila melanogaster GN=Grip84 PE=1 SV=1;>sp|Q9XYP7-2|GCP2_DROME Isoform 2 of Gamma-tubulin complex component 2 homolog OS=Drosophila melanogaster GN=Grip84;>tr|E1JJQ4|E1JJQ4_DROME Gamma-tubulin	65332					32976	32356		10			1	Grip84
sp|Q9XYU0|MCM7_DROME	>sp|Q9XYU0|MCM7_DROME DNA replication licensing factor Mcm7 OS=Drosophila melanogaster GN=Mcm7 PE=1 SV=1	284010	97740	42522	46057	51095	18843	27751	0.52431	-0.931507	0.218754	0.660044	0	Mcm7
tr|X2JAI4|X2JAI4_DROME	>tr|X2JAI4|X2JAI4_DROME DNA helicase OS=Drosophila melanogaster GN=Mcm3 PE=1 SV=1;>sp|Q9XYU1|MCM3_DROME DNA replication licensing factor Mcm3 OS=Drosophila melanogaster GN=Mcm3 PE=1 SV=1	559250	114600	172050	127370	74186	34331	36714	0.350783	-1.51135	0.0144559	1.83996	-1	Mcm3
sp|Q9XYZ5|DDB1_DROME	>sp|Q9XYZ5|DDB1_DROME DNA damage-binding protein 1 OS=Drosophila melanogaster GN=pic PE=1 SV=1	1105200	160580	169490	164700	408280	119520	82625	1.23376	0.303056	0.727154	0.138374	0	pic
sp|Q9XZ58|CSN5_DROME	>sp|Q9XZ58|CSN5_DROME COP9 signalosome complex subunit 5 OS=Drosophila melanogaster GN=CSN5 PE=1 SV=1;>tr|A0A0B4KHM2|A0A0B4KHM2_DROME COP9 signalosome subunit 5, isoform B OS=Drosophila melanogaster GN=CSN5 PE=4 SV=1	1632800	425810	437310	367890	188590	99050	114160	0.326399	-1.61529	0.00139557	2.85525	-1	CSN5
tr|A0A0B4LHE7|A0A0B4LHE7_DROME	>tr|A0A0B4LHE7|A0A0B4LHE7_DROME V-type proton ATPase subunit G OS=Drosophila melanogaster GN=Vha13 PE=3 SV=1;>sp|Q9XZH6|VATG_DROME V-type proton ATPase subunit G OS=Drosophila melanogaster GN=Vha13 PE=3 SV=1	2603600		190670	251570	760240	850350	550780	3.25822	1.70408	0.023492	1.62908	1	Vha13
tr|E1JGZ9|E1JGZ9_DROME	>tr|E1JGZ9|E1JGZ9_DROME Proteasome subunit alpha type OS=Drosophila melanogaster GN=CG30382 PE=1 SV=1;>sp|Q9XZJ4|PSA6_DROME Proteasome subunit alpha type-6 OS=Drosophila melanogaster GN=Prosalpha1 PE=1 SV=2	17725000	3735200	3362800	2537400	3428500	2545100	2116000	0.839571	-0.252276	0.381095	0.418967	0	Prosalpha1
sp|Q9Y0Y2|PURA_DROME	>sp|Q9Y0Y2|PURA_DROME Adenylosuccinate synthetase OS=Drosophila melanogaster GN=AdSS PE=2 SV=1	6867200	648550	843170	474590	2199800	1182200	1518900	2.49244	1.31756	0.0369584	1.43229	1	AdSS
sp|Q9Y105|SYQ_DROME	>sp|Q9Y105|SYQ_DROME Probable glutamine--tRNA ligase OS=Drosophila melanogaster GN=Aats-gln PE=2 SV=1	6646400	395890	481580	420570	512950	2316000	2519400	4.12033	2.04276	0.101834	0.992109	0	Aats-gln
tr|X2JFT8|X2JFT8_DROME	>tr|X2JFT8|X2JFT8_DROME CG4928, isoform C OS=Drosophila melanogaster GN=CG4928 PE=1 SV=1;>tr|B7Z155|B7Z155_DROME CG4928, isoform B OS=Drosophila melanogaster GN=CG4928 PE=1 SV=1;>sp|Q9Y115|UN93L_DROME UNC93-like protein OS=Drosophila melanogaster GN=CG4928	399010			20353		221960	156700	9.30231	3.21759	0.205481	0.687229	0	CG4928
tr|A0A0B4KEK0|A0A0B4KEK0_DROME	>tr|A0A0B4KEK0|A0A0B4KEK0_DROME Missing-in-metastasis, isoform N OS=Drosophila melanogaster GN=mim PE=4 SV=1;>tr|A8DY50|A8DY50_DROME Missing-in-metastasis, isoform B OS=Drosophila melanogaster GN=mim PE=4 SV=1;>tr|A0A0B4KEE8|A0A0B4KEE8_DROME Missing-in-met	73412					41719	31693		10			1	mim
tr|E5DK16|E5DK16_DROME	>tr|E5DK16|E5DK16_DROME Lipin isoform J OS=Drosophila melanogaster GN=Lpin PE=1 SV=1;>tr|A0A0B4JD31|A0A0B4JD31_DROME Lipin, isoform L OS=Drosophila melanogaster GN=Lpin PE=1 SV=1;>tr|A0A0B4JCS1|A0A0B4JCS1_DROME Lipin, isoform G OS=Drosophila melanogaster G	455350	31583	41969		62885	141660	177250	3.46054	1.791	0.130711	0.883689	0	Lpin
tr|Q7K1Q6|Q7K1Q6_DROME	>tr|Q7K1Q6|Q7K1Q6_DROME Jabba, isoform B OS=Drosophila melanogaster GN=Jabba PE=1 SV=1;>tr|B7YZK6|B7YZK6_DROME Jabba, isoform D OS=Drosophila melanogaster GN=Jabba PE=1 SV=1;>tr|A0A0B4KFV2|A0A0B4KFV2_DROME Jabba, isoform H OS=Drosophila melanogaster GN=Jab	997010	162060	133420	35691	185910	251040	228900	2.01059	1.00762	0.0595066	1.22543	0	Jabba
tr|A0A0B4JCW4|A0A0B4JCW4_DROME	>tr|A0A0B4JCW4|A0A0B4JCW4_DROME Succinate--CoA ligase [ADP-forming] subunit beta, mitochondrial OS=Drosophila melanogaster GN=skap PE=1 SV=1;>tr|A0A126GUR6|A0A126GUR6_DROME Succinate--CoA ligase [ADP-forming] subunit beta, mitochondrial OS=Drosophila melan	31164000	3787700	3821000	4409900	7664800	5945900	5534500	1.59296	0.671714	0.0253975	1.59521	0	skap
tr|Q961V3|Q961V3_DROME	>tr|Q961V3|Q961V3_DROME CG2246, isoform D OS=Drosophila melanogaster GN=CG2246 PE=1 SV=1;>tr|A0A0B4JD23|A0A0B4JD23_DROME CG2246, isoform J OS=Drosophila melanogaster GN=CG2246 PE=1 SV=1;>tr|Q7KRU0|Q7KRU0_DROME CG2246, isoform C OS=Drosophila melanogaster G	625420	88299	160590	126460	8953.5	87249	153860	0.666213	-0.585944	0.42257	0.374102	0	CG2246
tr|Q59E58|Q59E58_DROME	>tr|Q59E58|Q59E58_DROME Zipper, isoform C OS=Drosophila melanogaster GN=zip PE=1 SV=1;>tr|A0A0B4JD57|A0A0B4JD57_DROME Zipper, isoform F OS=Drosophila melanogaster GN=zip PE=1 SV=1;>tr|Q59E59|Q59E59_DROME Zipper, isoform D OS=Drosophila melanogaster GN=zip	8157600	515390	665120	529950	2297400	2000100	2149700	3.76928	1.91429	8.74147e-05	4.05842	1	zip
tr|A0A0B4JD82|A0A0B4JD82_DROME	>tr|A0A0B4JD82|A0A0B4JD82_DROME Stretchin-Mlck, isoform T OS=Drosophila melanogaster GN=Strn-Mlck PE=1 SV=1;>tr|A1ZA72|A1ZA72_DROME Stretchin-Mlck, isoform V OS=Drosophila melanogaster GN=Strn-Mlck PE=1 SV=2;>tr|A0A0B4KF84|A0A0B4KF84_DROME Stretchin-Mlck,	16922	1961.5	2779.9	2273.2	5453.7	4453.4		2.11853	1.08306	0.0123886	1.90698	1	Strn-Mlck
tr|A0A0B4JDA0|A0A0B4JDA0_DROME	>tr|A0A0B4JDA0|A0A0B4JDA0_DROME Moira, isoform B OS=Drosophila melanogaster GN=mor PE=1 SV=1;>tr|Q9VF03|Q9VF03_DROME Brahma associated protein 155 kDa OS=Drosophila melanogaster GN=mor PE=1 SV=3	134320	39780	36641	23719	34177			1.02388	0.0340418	0.94276	0.0255988	0	mor
tr|Q8T3K5|Q8T3K5_DROME	>tr|Q8T3K5|Q8T3K5_DROME SD07020p OS=Drosophila melanogaster GN=eIF4EHP PE=2 SV=1;>tr|A0A0B4JDB9|A0A0B4JDB9_DROME eIF4E-Homologous protein, isoform D OS=Drosophila melanogaster GN=eIF4EHP PE=3 SV=1	274720	82460	83060	51414	57783			0.799086	-0.323577	0.558878	0.252683	0	4EHP
tr|Q9VNF8|Q9VNF8_DROME	>tr|Q9VNF8|Q9VNF8_DROME Sec23 ortholog, isoform A OS=Drosophila melanogaster GN=Sec23 PE=1 SV=2;>tr|A0A0B4K6T4|A0A0B4K6T4_DROME Sec23 ortholog, isoform D OS=Drosophila melanogaster GN=Sec23 PE=1 SV=1;>tr|A0A0B4K5Z8|A0A0B4K5Z8_DROME Sec23 ortholog, isoform	2708600	290000	354790	356080	669090	495160	543480	1.70625	0.770825	0.0138105	1.85979	0	Sec23
tr|Q4ABH3|Q4ABH3_DROME	>tr|Q4ABH3|Q4ABH3_DROME Mustard, isoform M OS=Drosophila melanogaster GN=mtd PE=1 SV=1;>tr|Q7KNC5|Q7KNC5_DROME L82B OS=Drosophila melanogaster GN=mtd PE=1 SV=1;>tr|Q8MSQ5|Q8MSQ5_DROME Mustard, isoform G OS=Drosophila melanogaster GN=mtd PE=1 SV=1;>tr|Q8IPN	432740	22392	17101	55586	130080	99262	108320	3.55138	1.82838	0.00589674	2.22939	1	mtd
tr|Q9VB96|Q9VB96_DROME	>tr|Q9VB96|Q9VB96_DROME Uncharacterized protein, isoform A OS=Drosophila melanogaster GN=CG31075 PE=1 SV=2;>tr|A0A0B4K6I6|A0A0B4K6I6_DROME Uncharacterized protein, isoform B OS=Drosophila melanogaster GN=CG31075 PE=1 SV=1	4962800	387310	484860	549110	1578600	904880	1058000	2.49175	1.31716	0.0278537	1.55512	1	CG31075
tr|Q95U30|Q95U30_DROME	>tr|Q95U30|Q95U30_DROME Alpha-Esterase-5, isoform A OS=Drosophila melanogaster GN=alpha-Est5 PE=1 SV=1;>tr|A0A0B4K6V8|A0A0B4K6V8_DROME Alpha-Esterase-5, isoform B OS=Drosophila melanogaster GN=alpha-Est5 PE=1 SV=1	3511200	536120	565820	746060	762170	402710	498270	0.899973	-0.152046	0.650241	0.186926	0	alpha-Est5
tr|Q9V3V2|Q9V3V2_DROME	>tr|Q9V3V2|Q9V3V2_DROME Peptidylprolyl isomerase OS=Drosophila melanogaster GN=Fkbp14 PE=1 SV=1;>tr|A0A0B4K7C5|A0A0B4K7C5_DROME Peptidylprolyl isomerase OS=Drosophila melanogaster GN=Fkbp14 PE=1 SV=1	912130			26349		437080	448700	16.8086	4.07113	0.0153771	1.81313	1	Fkbp14
tr|A1ZB78|A1ZB78_DROME	>tr|A1ZB78|A1ZB78_DROME CG5174, isoform G OS=Drosophila melanogaster GN=CG5174 PE=1 SV=1;>tr|A1ZB77|A1ZB77_DROME CG5174, isoform J OS=Drosophila melanogaster GN=CG5174 PE=1 SV=1;>tr|Q7JRI6|Q7JRI6_DROME CG5174, isoform H OS=Drosophila melanogaster GN=CG5174	464730	114510	109080			153930	87203	1.07846	0.108973	0.81781	0.0873474	0	CG5174
tr|Q9VBU7|Q9VBU7_DROME	>tr|Q9VBU7|Q9VBU7_DROME Nucleoporin 358kD, isoform A OS=Drosophila melanogaster GN=Nup358 PE=1 SV=2;>tr|A0A0B4K7J2|A0A0B4K7J2_DROME Nucleoporin 358kD, isoform B OS=Drosophila melanogaster GN=Nup358 PE=1 SV=1	1361400	227500	212410	127360	243600	277430	273130	1.39997	0.485394	0.0832701	1.07951	0	Nup358
tr|A1Z8W9|A1Z8W9_DROME	>tr|A1Z8W9|A1Z8W9_DROME Gartenzwerg, isoform A OS=Drosophila melanogaster GN=garz PE=1 SV=1;>tr|A0A0B4K7N0|A0A0B4K7N0_DROME Gartenzwerg, isoform C OS=Drosophila melanogaster GN=garz PE=1 SV=1;>tr|A1Z8W8|A1Z8W8_DROME Gartenzwerg, isoform B OS=Drosophila mel	15246				6474.7	3961.5	4809.9		10			1	garz
tr|E1JGQ3|E1JGQ3_DROME	>tr|E1JGQ3|E1JGQ3_DROME Glycogenin, isoform I OS=Drosophila melanogaster GN=Glycogenin PE=1 SV=1;>tr|Q9W2J6|Q9W2J6_DROME Glycogenin, isoform B OS=Drosophila melanogaster GN=Glycogenin PE=1 SV=3;>tr|A0A0B4LG72|A0A0B4LG72_DROME Glycogenin, isoform H OS=Droso	514370	91751	89855	99393		109760	123610	1.24575	0.317017	0.0366725	1.43566	0	Glycogenin
tr|A0A0B4K891|A0A0B4K891_DROME	>tr|A0A0B4K891|A0A0B4K891_DROME CG8963, isoform E OS=Drosophila melanogaster GN=CG8963 PE=1 SV=1;>tr|Q7K581|Q7K581_DROME CG8963, isoform A OS=Drosophila melanogaster GN=CG8963 PE=1 SV=1	663050	71649	197370	140880	75669	84411	93070	0.617591	-0.695276	0.227633	0.642765	0	CG8963
tr|A1Z6Z3|A1Z6Z3_DROME	>tr|A1Z6Z3|A1Z6Z3_DROME Aldehyde dehydrogenase OS=Drosophila melanogaster GN=Aldh-III PE=1 SV=1;>tr|A0A0B4KEE1|A0A0B4KEE1_DROME Aldehyde dehydrogenase OS=Drosophila melanogaster GN=Aldh-III PE=1 SV=1;>tr|Q7JR61|Q7JR61_DROME Aldehyde dehydrogenase OS=Drosop	1050200	135460	67861	182160	154870	220550	289280	1.72434	0.786044	0.142379	0.846553	0	Aldh-III
tr|A0A0B4KF27|A0A0B4KF27_DROME	>tr|A0A0B4KF27|A0A0B4KF27_DROME NAD kinase 2, mitochondrial OS=Drosophila melanogaster GN=CG8080 PE=1 SV=1;>tr|A0A0B4KFF1|A0A0B4KFF1_DROME NAD kinase 2, mitochondrial OS=Drosophila melanogaster GN=CG8080 PE=1 SV=1;>tr|A0A0B4KEH3|A0A0B4KEH3_DROME NAD kinase	662020	88082			227450	177150	169340	2.17199	1.11902	0.105177	0.978081	0	CG8080
tr|A0A0B4KEJ7|A0A0B4KEJ7_DROME	>tr|A0A0B4KEJ7|A0A0B4KEJ7_DROME Coronin OS=Drosophila melanogaster GN=coro PE=1 SV=1	448660				146970	142480	159220		10			1	coro
tr|Q5U156|Q5U156_DROME	>tr|Q5U156|Q5U156_DROME RE01954p OS=Drosophila melanogaster GN=row PE=1 SV=1;>tr|A0A0B4KER0|A0A0B4KER0_DROME Relative of woc, isoform C OS=Drosophila melanogaster GN=row PE=1 SV=1;>tr|Q95RL2|Q95RL2_DROME LD21608p OS=Drosophila melanogaster GN=row PE=1 SV=1	16777	1883.3			5340.4	4199.4	5353.5	2.63603	1.39837	0.0564837	1.24808	0	row
tr|Q7JVY0|Q7JVY0_DROME	>tr|Q7JVY0|Q7JVY0_DROME Coronin OS=Drosophila melanogaster GN=coro PE=1 SV=1;>tr|A0A0B4KEU5|A0A0B4KEU5_DROME Coronin OS=Drosophila melanogaster GN=coro PE=1 SV=1	9203700	1606400	1157900	1436200	1564400	1721900	1716900	1.1911	0.25229	0.129715	0.88701	0	coro
tr|A0A0B4KEW6|A0A0B4KEW6_DROME	>tr|A0A0B4KEW6|A0A0B4KEW6_DROME Amphiphysin, isoform B OS=Drosophila melanogaster GN=Amph PE=1 SV=1;>tr|Q7KLE5|Q7KLE5_DROME Amphiphysin OS=Drosophila melanogaster GN=Amph PE=1 SV=1;>tr|A0A0B4KFR7|A0A0B4KFR7_DROME Amphiphysin, isoform C OS=Drosophila melano	775380	87054	68326		129580	222450	267970	2.66015	1.4115	0.0931621	1.03076	0	Amph
tr|Q0E993|Q0E993_DROME	>tr|Q0E993|Q0E993_DROME Valyl-tRNA synthetase, isoform A OS=Drosophila melanogaster GN=ValRS PE=1 SV=1;>tr|A0A0B4KF06|A0A0B4KF06_DROME Valyl-tRNA synthetase, isoform C OS=Drosophila melanogaster GN=ValRS PE=1 SV=1	5852900	1274300	1507600	983530	765500	571770	750160	0.554367	-0.851087	0.0269334	1.56971	0	Aats-val
tr|B7YZP4|B7YZP4_DROME	>tr|B7YZP4|B7YZP4_DROME Sulfotransferase 3, isoform B OS=Drosophila melanogaster GN=St3 PE=4 SV=1;>tr|Q9W1L7|Q9W1L7_DROME Sulfotransferase 3, isoform A OS=Drosophila melanogaster GN=St3 PE=4 SV=2;>tr|A0A0B4KF40|A0A0B4KF40_DROME Sulfotransferase 3, isoform	1368600	95706	93662	89242	581820	251660	256500	3.91221	1.96798	0.0685725	1.16385	0	St3
tr|A1Z7H3|A1Z7H3_DROME	>tr|A1Z7H3|A1Z7H3_DROME Acyl-CoA synthetase long-chain, isoform C OS=Drosophila melanogaster GN=Acsl PE=1 SV=1;>tr|Q8T3L1|Q8T3L1_DROME Acyl-CoA synthetase long-chain, isoform A OS=Drosophila melanogaster GN=Acsl PE=1 SV=1;>tr|A1Z7H2|A1Z7H2_DROME Acyl-CoA s	3467300	620700	644990	553690	540710	573180	534020	0.905754	-0.142809	0.128126	0.892362	0	Acsl
tr|A0A0B4KFH1|A0A0B4KFH1_DROME	>tr|A0A0B4KFH1|A0A0B4KFH1_DROME Muskelin, isoform C OS=Drosophila melanogaster GN=muskelin PE=4 SV=1;>tr|Q0E9A5|Q0E9A5_DROME FI21269p1 OS=Drosophila melanogaster GN=muskelin PE=2 SV=1	217790	63286	68199	86303					-10			-1	muskelin
tr|A0A0B4KH36|A0A0B4KH36_DROME	>tr|A0A0B4KH36|A0A0B4KH36_DROME BIR repeat containing ubiquitin-conjugating enzyme, isoform C OS=Drosophila melanogaster GN=Bruce PE=1 SV=1;>tr|A0A0B4KFQ0|A0A0B4KFQ0_DROME BIR repeat containing ubiquitin-conjugating enzyme, isoform E OS=Drosophila melanoga	2911.2			2911.2					-10			-1	Bruce
tr|Q6NR72|Q6NR72_DROME	>tr|Q6NR72|Q6NR72_DROME CG4019, isoform A OS=Drosophila melanogaster GN=Eglp4 PE=1 SV=1;>tr|Q8MLR2|Q8MLR2_DROME CG4019, isoform C OS=Drosophila melanogaster GN=Eglp4 PE=1 SV=1;>tr|D1Z394|D1Z394_DROME CG4019, isoform E OS=Drosophila melanogaster GN=Eglp4 PE	778230	277250	278430	222550					-10			-1	CG4019
tr|A0A0B4KFZ7|A0A0B4KFZ7_DROME	>tr|A0A0B4KFZ7|A0A0B4KFZ7_DROME Mitochondrial pyruvate carrier OS=Drosophila melanogaster GN=CG9399 PE=1 SV=1;>tr|Q9VHB1|Q9VHB1_DROME Mitochondrial pyruvate carrier OS=Drosophila melanogaster GN=CG9399 PE=1 SV=1	881620		148350	163000	368850		201420	1.8316	0.873108	0.263332	0.579496	0	CG9399
tr|C1C529|C1C529_DROME	>tr|C1C529|C1C529_DROME MIP03096p OS=Drosophila melanogaster GN=Mf PE=1 SV=1;>tr|Q9VFC6|Q9VFC6_DROME MIP06926p OS=Drosophila melanogaster GN=Mf PE=1 SV=1;>tr|Q8INF1|Q8INF1_DROME Myofilin, isoform E OS=Drosophila melanogaster GN=Mf PE=1 SV=1;>tr|Q8I062|Q8I0	508340				193110	98416	216810		10			1	Mf
tr|A0A0B4KG94|A0A0B4KG94_DROME	>tr|A0A0B4KG94|A0A0B4KG94_DROME CG6908, isoform B OS=Drosophila melanogaster GN=CG6908 PE=1 SV=1;>tr|Q9VGJ6|Q9VGJ6_DROME CG6908, isoform A OS=Drosophila melanogaster GN=CG6908 PE=1 SV=1	1488600	192410	145440	292160	369640	310170	178830	1.3629	0.446679	0.343871	0.463604	0	CG6908
tr|A0A0B4KGF7|A0A0B4KGF7_DROME	>tr|A0A0B4KGF7|A0A0B4KGF7_DROME Beta-Mannosidase, isoform H OS=Drosophila melanogaster GN=beta-Man PE=1 SV=1;>tr|Q9VMY5|Q9VMY5_DROME Beta-Mannosidase, isoform A OS=Drosophila melanogaster GN=beta-Man PE=1 SV=2;>tr|Q0KIE6|Q0KIE6_DROME Beta-Mannosidase, isof	871490	181490	206170	210300	96142	75465	101920	0.457434	-1.12837	0.000855117	3.06797	-1	beta-Man
tr|A4V364|A4V364_DROME	>tr|A4V364|A4V364_DROME Syncrip, isoform F OS=Drosophila melanogaster GN=Syp PE=1 SV=1;>tr|A8JR54|A8JR54_DROME Syncrip, isoform H OS=Drosophila melanogaster GN=Syp PE=1 SV=1;>tr|Q8IN47|Q8IN47_DROME Syncrip, isoform A OS=Drosophila melanogaster GN=Syp PE=1	1978000	193270	105440	124420	479740	393710	681390	3.67462	1.87759	0.0134459	1.87141	1	Syp
tr|Q9VDY8|Q9VDY8_DROME	>tr|Q9VDY8|Q9VDY8_DROME MIP08680p OS=Drosophila melanogaster GN=vib PE=1 SV=1;>tr|A0A0B4KGG5|A0A0B4KGG5_DROME Vibrator, isoform B OS=Drosophila melanogaster GN=vib PE=1 SV=1	521350	83765	120250	61299		154810	101230	1.44757	0.533631	0.276635	0.558093	0	vib
tr|Q9VDT3|Q9VDT3_DROME	>tr|Q9VDT3|Q9VDT3_DROME CG4562, isoform A OS=Drosophila melanogaster GN=CG4562 PE=4 SV=2;>tr|A0A0B4KGI0|A0A0B4KGI0_DROME CG4562, isoform E OS=Drosophila melanogaster GN=CG4562 PE=4 SV=1;>tr|Q5BI72|Q5BI72_DROME CG4562, isoform B OS=Drosophila melanogaster G	38374			8206.1			30168	3.67629	1.87825			0	CG4562
tr|A0A0B4KGQ0|A0A0B4KGQ0_DROME	>tr|A0A0B4KGQ0|A0A0B4KGQ0_DROME Ran binding protein 3, isoform B OS=Drosophila melanogaster GN=RanBP3 PE=1 SV=1;>tr|Q9VCI7|Q9VCI7_DROME LD02979p OS=Drosophila melanogaster GN=RanBP3 PE=1 SV=1	382360	60674	46499	45045	90703	66316	73125	1.51194	0.596398	0.0420495	1.37624	0	RanBP3
tr|Q9VEV1|Q9VEV1_DROME	>tr|Q9VEV1|Q9VEV1_DROME LD10376p OS=Drosophila melanogaster GN=Pak3 PE=1 SV=1;>tr|A0A0B4KGS4|A0A0B4KGS4_DROME Pak3, isoform D OS=Drosophila melanogaster GN=Pak3 PE=1 SV=1	305620	10680	30050	26484		140030	98381	5.32057	2.41158	0.0113117	1.94647	1	Pak3
tr|Q9VDI1|Q9VDI1_DROME	>tr|Q9VDI1|Q9VDI1_DROME LD46328p OS=Drosophila melanogaster GN=Synd PE=1 SV=2;>tr|A0A0B4KH28|A0A0B4KH28_DROME Syndapin, isoform C OS=Drosophila melanogaster GN=Synd PE=1 SV=1	492190			28484	54354	195980	213370	5.42649	2.44002	0.337175	0.472145	0	Synd
tr|Q9VB04|Q9VB04_DROME	>tr|Q9VB04|Q9VB04_DROME Barentsz, isoform A OS=Drosophila melanogaster GN=btz PE=1 SV=1;>tr|Q7KRX5|Q7KRX5_DROME Barentsz, isoform B OS=Drosophila melanogaster GN=btz PE=1 SV=1;>tr|A0A0B4KH64|A0A0B4KH64_DROME Barentsz, isoform D OS=Drosophila melanogaster G	207660	68024	19325	50712		39452	30151	0.75622	-0.403122	0.591282	0.228206	0	btz
tr|A0A0B4KHA0|A0A0B4KHA0_DROME	>tr|A0A0B4KHA0|A0A0B4KHA0_DROME Mann-cup, isoform B OS=Drosophila melanogaster GN=m-cup PE=4 SV=1;>tr|Q9I7J2|Q9I7J2_DROME FI19351p1 OS=Drosophila melanogaster GN=m-cup PE=2 SV=2	849530				367600	234140	247790		10			1	m-cup
tr|Q8IN90|Q8IN90_DROME	>tr|Q8IN90|Q8IN90_DROME PP2A-B, isoform C OS=Drosophila melanogaster GN=PP2A-B PE=1 SV=1;>tr|Q5BIJ2|Q5BIJ2_DROME PP2A-B, isoform K OS=Drosophila melanogaster GN=PP2A-B PE=1 SV=1;>tr|Q0KI58|Q0KI58_DROME PP2A-B, isoform D OS=Drosophila melanogaster GN=P	24699	24699							-10			-1	PP2A-B'
tr|B7Z0R2|B7Z0R2_DROME	>tr|B7Z0R2|B7Z0R2_DROME Sponge, isoform D OS=Drosophila melanogaster GN=spg PE=1 SV=2;>tr|A0A0B4KHD2|A0A0B4KHD2_DROME Sponge, isoform F OS=Drosophila melanogaster GN=spg PE=1 SV=1;>tr|Q9VAS8|Q9VAS8_DROME Sponge, isoform E OS=Drosophila melanogaster GN=spg	8373.8	4501.7	3872.1						-10			-1	spg
tr|Q9VA83|Q9VA83_DROME	>tr|Q9VA83|Q9VA83_DROME Ferritin OS=Drosophila melanogaster GN=Fer2LCH PE=1 SV=1;>tr|A0A0B4KHF0|A0A0B4KHF0_DROME Ferritin OS=Drosophila melanogaster GN=Fer2LCH PE=1 SV=1	109110000	3395900	5513500	9512700	37216000	27251000	26223000	4.92289	2.29951	0.00361546	2.44184	1	Fer2LCH
tr|Q9Y154|Q9Y154_DROME	>tr|Q9Y154|Q9Y154_DROME BcDNA.GH03163 OS=Drosophila melanogaster GN=cindr PE=1 SV=1;>tr|Q9VA35|Q9VA35_DROME CIN85 and CD2AP orthologue, isoform A OS=Drosophila melanogaster GN=cindr PE=1 SV=1;>tr|Q86PF3|Q86PF3_DROME CIN85 and CD2AP orthologue, isoform D OS	237470	54635	49983	17364	72758	28992	13737	0.946754	-0.0789378	0.923651	0.0344919	0	cindr
tr|Q9VDE3|Q9VDE3_DROME	>tr|Q9VDE3|Q9VDE3_DROME LD08669p OS=Drosophila melanogaster GN=slmb PE=2 SV=1;>tr|A0A0B4KHK1|A0A0B4KHK1_DROME Supernumerary limbs, isoform B OS=Drosophila melanogaster GN=slmb PE=4 SV=1	151270	79552	48227	23494					-10			-1	slmb
tr|Q9VDZ1|Q9VDZ1_DROME	>tr|Q9VDZ1|Q9VDZ1_DROME CG5555, isoform A OS=Drosophila melanogaster GN=CG5555 PE=1 SV=2;>tr|A0A0B4KHR2|A0A0B4KHR2_DROME CG5555, isoform B OS=Drosophila melanogaster GN=CG5555 PE=1 SV=1	48114	31145	16969						-10			-1	CG5555
tr|A0A0B4KHY8|A0A0B4KHY8_DROME	>tr|A0A0B4KHY8|A0A0B4KHY8_DROME Uncharacterized protein, isoform C OS=Drosophila melanogaster GN=CG10254 PE=1 SV=1;>tr|Q9XZ32|Q9XZ32_DROME Putative uncharacterized protein OS=Drosophila melanogaster GN=CG10254 PE=1 SV=1	134840	9098.1	7498.6	71103		24220	22923	0.806325	-0.310566	0.847548	0.0718355	0	CG10254
tr|A0A0B4KI43|A0A0B4KI43_DROME	>tr|A0A0B4KI43|A0A0B4KI43_DROME Without children, isoform D OS=Drosophila melanogaster GN=woc PE=1 SV=1;>tr|Q9VB55|Q9VB55_DROME Without children, isoform A OS=Drosophila melanogaster GN=woc PE=1 SV=2;>tr|A0A0B4KHZ0|A0A0B4KHZ0_DROME Without children, isofor	140370	16746	20119	17086	11236	45918	29264	1.60179	0.679682	0.343083	0.464601	0	woc
tr|A0A0B4KHZ3|A0A0B4KHZ3_DROME	>tr|A0A0B4KHZ3|A0A0B4KHZ3_DROME Tusp, isoform G OS=Drosophila melanogaster GN=Tusp PE=3 SV=1;>tr|Q9VB18|Q9VB18_DROME FI16909p1 OS=Drosophila melanogaster GN=Tusp PE=2 SV=4;>tr|A0A0B4KI44|A0A0B4KI44_DROME Tusp, isoform F OS=Drosophila melanogaster GN=Tusp P	64807					64807			10			1	Tusp
tr|H1UUD2|H1UUD2_DROME	>tr|H1UUD2|H1UUD2_DROME Ferritin OS=Drosophila melanogaster GN=Fer1HCH PE=1 SV=1;>tr|Q7KRU8|Q7KRU8_DROME Ferritin OS=Drosophila melanogaster GN=Fer1HCH PE=1 SV=1;>tr|B8A405|B8A405_DROME Ferritin OS=Drosophila melanogaster GN=Fer1HCH PE=1 SV=1;>tr|A0A0B4KI2	61738000	10224000	8878000	3707600	15131000	11149000	12649000	1.70669	0.771204	0.0797726	1.09815	0	Fer1HCH
tr|A0A0B4LEK8|A0A0B4LEK8_DROME	>tr|A0A0B4LEK8|A0A0B4LEK8_DROME Sec24AB ortholog, isoform C OS=Drosophila melanogaster GN=Sec24AB PE=1 SV=1;>tr|A1Z813|A1Z813_DROME Sec24AB ortholog, isoform A OS=Drosophila melanogaster GN=Sec24AB PE=1 SV=1	41329	12611	12276	16441					-10			-1	Sec24AB
tr|A1Z7J7|A1Z7J7_DROME	>tr|A1Z7J7|A1Z7J7_DROME Sec31 ortholog, isoform A OS=Drosophila melanogaster GN=Sec31 PE=1 SV=1;>tr|A1Z7J6|A1Z7J6_DROME Sec31 ortholog, isoform B OS=Drosophila melanogaster GN=Sec31 PE=1 SV=1;>tr|A0A0B4LEY1|A0A0B4LEY1_DROME Sec31 ortholog, isoform C OS=Dro	575500		34715	27403	278180	95513	139690	5.50976	2.46199	0.143399	0.843454	0	Sec31
tr|A0A0B4LFH2|A0A0B4LFH2_DROME	>tr|A0A0B4LFH2|A0A0B4LFH2_DROME Caspar, isoform C OS=Drosophila melanogaster GN=casp PE=1 SV=1;>tr|Q7JUP3|Q7JUP3_DROME Caspar, isoform A OS=Drosophila melanogaster GN=casp PE=1 SV=1	1064500	177410	183780	162040	193460	186210	161660	1.03459	0.0490631	0.630023	0.200644	0	casp
tr|A0A0B4LFH8|A0A0B4LFH8_DROME	>tr|A0A0B4LFH8|A0A0B4LFH8_DROME ATP-citrate synthase OS=Drosophila melanogaster GN=ATPCL PE=1 SV=1	78671		38370	20529	19772			0.671387	-0.574784	0.643769	0.19127	0	ATPCL
tr|A0A0B4LFK8|A0A0B4LFK8_DROME	>tr|A0A0B4LFK8|A0A0B4LFK8_DROME Dicer-2, isoform B OS=Drosophila melanogaster GN=Dcr-2 PE=1 SV=1;>tr|A1ZAW0|A1ZAW0_DROME Dicer-2, isoform A OS=Drosophila melanogaster GN=Dcr-2 PE=1 SV=1	240400	47463	62629	54548	31796	19736	24229	0.460162	-1.11979	0.00620307	2.20739	-1	Dcr-2
tr|A0A0B4LFP2|A0A0B4LFP2_DROME	>tr|A0A0B4LFP2|A0A0B4LFP2_DROME Uncharacterized protein, isoform C OS=Drosophila melanogaster GN=CG12547 PE=1 SV=1;>tr|Q9W5T4|Q9W5T4_DROME RE33981p OS=Drosophila melanogaster GN=CG12547 PE=1 SV=2	117240					48069	69170		10			1	CG12547
tr|A0A0B4LFR4|A0A0B4LFR4_DROME	>tr|A0A0B4LFR4|A0A0B4LFR4_DROME Oligosaccharide transferase delta subunit, isoform B OS=Drosophila melanogaster GN=OstDelta PE=1 SV=1;>tr|Q7K110|Q7K110_DROME LD18774p OS=Drosophila melanogaster GN=OstDelta PE=1 SV=1	112210	20532	42617	49057					-10			-1	OstDelta
tr|A0A0B4LFU6|A0A0B4LFU6_DROME	>tr|A0A0B4LFU6|A0A0B4LFU6_DROME Beta-glucuronidase OS=Drosophila melanogaster GN=CG15117 PE=1 SV=1;>tr|A0A0B4LGY4|A0A0B4LGY4_DROME Beta-glucuronidase OS=Drosophila melanogaster GN=CG15117 PE=1 SV=1;>tr|Q7K173|Q7K173_DROME Beta-glucuronidase OS=Drosophila m	935390	149210	119650	128590	208730	174670	154530	1.35345	0.436645	0.0606617	1.21709	0	CG15117
tr|A0A0B4LFW3|A0A0B4LFW3_DROME	>tr|A0A0B4LFW3|A0A0B4LFW3_DROME Odorant-binding protein 56e, isoform B OS=Drosophila melanogaster GN=Obp56e PE=1 SV=1;>tr|Q7K088|Q7K088_DROME GEO08224p1 OS=Drosophila melanogaster GN=Obp56e PE=1 SV=1	1939600	76986	58571		620470	624010	559560	8.87223	3.1493	0.00031101	3.50723	1	Obp56e
tr|A0A0B4LGC6|A0A0B4LGC6_DROME	>tr|A0A0B4LGC6|A0A0B4LGC6_DROME Lethal (2) k09913, isoform G OS=Drosophila melanogaster GN=l(2)k09913 PE=1 SV=1;>tr|Q8MLS7|Q8MLS7_DROME Lethal (2) k09913, isoform D OS=Drosophila melanogaster GN=l(2)k09913 PE=1 SV=1;>tr|A0A0B4LG95|A0A0B4LG95_DROME Lethal (	719510	232170	213900	230710			42732	0.18942	-2.40034	0.00408523	2.38878	-1	l(2)k09913
tr|Q8MKK5|Q8MKK5_DROME	>tr|Q8MKK5|Q8MKK5_DROME GH09271p OS=Drosophila melanogaster GN=kcc PE=1 SV=1;>tr|Q9W1G6|Q9W1G6_DROME Kazachoc, isoform A OS=Drosophila melanogaster GN=kcc PE=1 SV=2;>tr|Q9W1G5|Q9W1G5_DROME Kazachoc, isoform C OS=Drosophila melanogaster GN=kcc PE=1 SV=2;>tr	184730	61237	91328	32168					-10			-1	kcc
tr|A0A0B4LHH1|A0A0B4LHH1_DROME	>tr|A0A0B4LHH1|A0A0B4LHH1_DROME CG3209, isoform E OS=Drosophila melanogaster GN=CG3209 PE=1 SV=1;>tr|Q960R0|Q960R0_DROME CG3209, isoform B OS=Drosophila melanogaster GN=CG3209 PE=1 SV=1;>tr|Q9W1B5|Q9W1B5_DROME CG3209, isoform C OS=Drosophila melanogaster G	57915			57915					-10			-1	CG3209
tr|Q9VDS7|Q9VDS7_DROME	>tr|Q9VDS7|Q9VDS7_DROME CG4538, isoform A OS=Drosophila melanogaster GN=CG4538-RA PE=1 SV=2;>tr|A0A0B4LID7|A0A0B4LID7_DROME CG4538, isoform C OS=Drosophila melanogaster GN=CG4538 PE=1 SV=1	1152800	114490	153700	169890	289470	212840	212380	1.63141	0.706123	0.0388361	1.41076	0	CG4538
tr|A0A0C4DHA1|A0A0C4DHA1_DROME	>tr|A0A0C4DHA1|A0A0C4DHA1_DROME Chondrocyte-derived ezrin-like domain containing protein ortholog, isoform F OS=Drosophila melanogaster GN=Cdep PE=1 SV=1;>tr|Q2M1E6|Q2M1E6_DROME Chondrocyte-derived ezrin-like domain containing protein ortholog, isoform E O	38763	29767	8995.6						-10			-1	Cdep
tr|A1ZA89|A1ZA89_DROME	>tr|A1ZA89|A1ZA89_DROME Dystroglycan, isoform B OS=Drosophila melanogaster GN=Dg PE=1 SV=1;>tr|Q8STB9|Q8STB9_DROME Dystroglycan type II OS=Drosophila melanogaster GN=Dg PE=1 SV=1;>tr|Q8WR08|Q8WR08_DROME Dystroglycan type I OS=Drosophila melanogaster GN=Dg	40759	26704	14056						-10			-1	Dg
tr|A0A0C4DHG4|A0A0C4DHG4_DROME	>tr|A0A0C4DHG4|A0A0C4DHG4_DROME Uncharacterized protein, isoform C OS=Drosophila melanogaster GN=CG10265 PE=4 SV=1;>tr|Q7K2K2|Q7K2K2_DROME FI04612p OS=Drosophila melanogaster GN=CG10265-RB PE=2 SV=1	1003200	112530			291340	272000	327370	2.63844	1.39968	0.0296049	1.52864	1	CG10265
tr|Q9V3D8|Q9V3D8_DROME	>tr|Q9V3D8|Q9V3D8_DROME GH27579p OS=Drosophila melanogaster GN=grsm PE=1 SV=1;>tr|A0A0C4FEI8|A0A0C4FEI8_DROME Granny smith, isoform F OS=Drosophila melanogaster GN=grsm PE=1 SV=1	5994600	762980	917410	535450	2233800	687840	857110	1.70534	0.770055	0.357952	0.446175	0	grsm
tr|A0A0S0WIA2|A0A0S0WIA2_DROME	>tr|A0A0S0WIA2|A0A0S0WIA2_DROME Multidrug-Resistance like protein 1, isoform R OS=Drosophila melanogaster GN=MRP PE=1 SV=1;>tr|Q9I7N0|Q9I7N0_DROME FI23224p1 OS=Drosophila melanogaster GN=MRP PE=1 SV=2;>tr|Q7KTD0|Q7KTD0_DROME Multidrug-Resistance like prote	32025	15362	16663						-10			-1	MRP
tr|X2JES1|X2JES1_DROME	>tr|X2JES1|X2JES1_DROME Fructose-1,6-bisphosphatase, isoform C OS=Drosophila melanogaster GN=fbp PE=1 SV=1;>tr|Q9VIS3|Q9VIS3_DROME Fructose-1,6-bisphosphatase OS=Drosophila melanogaster GN=fbp PE=1 SV=1;>tr|A0A0U1RVK6|A0A0U1RVK6_DROME Fructose-1,6-bisphosp	48551000	5968300	6395700	6326700	13446000	8145000	8269300	1.5976	0.675908	0.100715	0.996907	0	fbp
tr|A0A126GUN6|A0A126GUN6_DROME	>tr|A0A126GUN6|A0A126GUN6_DROME Z band alternatively spliced PDZ-motif protein 52, isoform X OS=Drosophila melanogaster GN=Zasp52 PE=1 SV=1;>tr|A0A0B4KER6|A0A0B4KER6_DROME Z band alternatively spliced PDZ-motif protein 52, isoform N OS=Drosophila melanogas	7276000	456400	527040	380050	2262300	1945300	1704900	4.3363	2.11646	0.000813781	3.08949	1	NA
tr|A0A126GUQ4|A0A126GUQ4_DROME	>tr|A0A126GUQ4|A0A126GUQ4_DROME Carnitine O-Acetyl-Transferase, isoform E OS=Drosophila melanogaster GN=CRAT PE=1 SV=1;>tr|Q0KIA8|Q0KIA8_DROME Carnitine O-Acetyl-Transferase, isoform B OS=Drosophila melanogaster GN=CRAT PE=1 SV=1;>tr|Q9VI16|Q9VI16_DROME Ca	2046600	346440	295280	263560	640390	235270	265680	1.26076	0.334293	0.584523	0.233198	0	NA
tr|Q9VEZ6|Q9VEZ6_DROME	>tr|Q9VEZ6|Q9VEZ6_DROME Uncharacterized protein, isoform A OS=Drosophila melanogaster GN=CG10407 PE=1 SV=1;>tr|A0A126GUV0|A0A126GUV0_DROME Uncharacterized protein, isoform C OS=Drosophila melanogaster GN=CG10407 PE=1 SV=1	398320	143920	132480	121920					-10			-1	CG10407
tr|Q9VBU6|Q9VBU6_DROME	>tr|Q9VBU6|Q9VBU6_DROME RE24638p OS=Drosophila melanogaster GN=CG11857 PE=1 SV=1;>tr|A0A140SRF8|A0A140SRF8_DROME Uncharacterized protein, isoform C OS=Drosophila melanogaster GN=CG11857 PE=1 SV=1	200310		37512		162800			4.33994	2.11768			0	CG11857
tr|A0AQH0|A0AQH0_DROME	>tr|A0AQH0|A0AQH0_DROME Proteasome subunit beta type OS=Drosophila melanogaster GN=Prosbeta1 PE=1 SV=1	26333000	4731800	4837600	4374700	4724800	3820400	3843200	0.888433	-0.170665	0.190139	0.720928	0	Prosbeta1
tr|A1Z6L9|A1Z6L9_DROME	>tr|A1Z6L9|A1Z6L9_DROME FI21274p1 OS=Drosophila melanogaster GN=Trap1 PE=1 SV=1	2434800	487860	457950	320130	486170	379760	302940	0.923322	-0.115095	0.684872	0.164391	0	Trap1
tr|A1Z6M6|A1Z6M6_DROME	>tr|A1Z6M6|A1Z6M6_DROME DNA polymerase interacting tpr containing protein of 47kD, isoform A OS=Drosophila melanogaster GN=Dpit47 PE=1 SV=1	84777		47301	37476					-10			-1	Dpit47
tr|A1Z6N5|A1Z6N5_DROME	>tr|A1Z6N5|A1Z6N5_DROME CG3270 OS=Drosophila melanogaster GN=CG3270-RA PE=1 SV=1	4248300	1188000	843860	728480	418370	584260	485350	0.539057	-0.891491	0.0440677	1.35588	0	CG3270
tr|A1Z6V5|A1Z6V5_DROME	>tr|A1Z6V5|A1Z6V5_DROME FI01422p OS=Drosophila melanogaster GN=Spn43Ab PE=1 SV=1	1893500	378940	164150	169420	614930	245040	321010	1.65749	0.729002	0.305903	0.514416	0	Spn43Ab
tr|A1Z6X6|A1Z6X6_DROME	>tr|A1Z6X6|A1Z6X6_DROME Glyoxalase 1 OS=Drosophila melanogaster GN=Glo1 PE=1 SV=1	18249000	1400400	1242200	2500600	8445700	1420900	3239500	2.54824	1.3495	0.283003	0.548209	0	Glo1
tr|A1Z729|A1Z729_DROME	>tr|A1Z729|A1Z729_DROME CG2064 OS=Drosophila melanogaster GN=CG2064 PE=1 SV=1;>tr|Q7JYX2|Q7JYX2_DROME CG2065, isoform A OS=Drosophila melanogaster GN=CG2065 PE=1 SV=1;>tr|Q8MZG9|Q8MZG9_DROME CG2070, isoform A OS=Drosophila melanogaster GN=CG2070 PE=2 SV=1;	695930					695930			10			1	CG2064
tr|A1Z784|A1Z784_DROME	>tr|A1Z784|A1Z784_DROME Acetyl-CoA carboxylase, isoform A OS=Drosophila melanogaster GN=ACC PE=1 SV=1;>tr|Q7JV23|Q7JV23_DROME Acetyl-CoA carboxylase, isoform B OS=Drosophila melanogaster GN=ACC PE=1 SV=1;>tr|A8DY67|A8DY67_DROME Acetyl-CoA carboxylase, isof	17445000	3680600	3180700	2485000	3720300	2070100	2308300	0.866514	-0.206705	0.539613	0.267917	0	ACC
tr|A1Z7F1|A1Z7F1_DROME	>tr|A1Z7F1|A1Z7F1_DROME Maltase A6, isoform C OS=Drosophila melanogaster GN=Mal-A6 PE=1 SV=2	795350	171190	143080	52675	280190	76959	71258	1.1675	0.223418	0.804468	0.094491	0	Mal-A6
tr|A1Z7F2|A1Z7F2_DROME	>tr|A1Z7F2|A1Z7F2_DROME Maltase A7, isoform A OS=Drosophila melanogaster GN=Mal-A7 PE=4 SV=1	381050	154950	120570	40900		29378	35256	0.3064	-1.70651	0.192424	0.71574	0	Mal-A7
tr|A1Z7H7|A1Z7H7_DROME	>tr|A1Z7H7|A1Z7H7_DROME CG8586, isoform A OS=Drosophila melanogaster GN=CG8586-RA PE=1 SV=1	5877500	493830	528040	427590	1651500	1378000	1398500	3.05493	1.61114	0.000431725	3.36479	1	CG8586
tr|A1Z7K2|A1Z7K2_DROME	>tr|A1Z7K2|A1Z7K2_DROME FI03455p OS=Drosophila melanogaster GN=CG30349-RA PE=1 SV=1	207150	72448	38926	30668	65112			1.3752	0.45964	0.558788	0.252753	0	CG30349
tr|A1Z7K6|A1Z7K6_DROME	>tr|A1Z7K6|A1Z7K6_DROME CG8243 OS=Drosophila melanogaster GN=CG8243-RA PE=1 SV=1	164860		89690	75173					-10			-1	CG8243
tr|A1Z7K8|A1Z7K8_DROME	>tr|A1Z7K8|A1Z7K8_DROME CG8235 OS=Drosophila melanogaster GN=AIMP1 PE=1 SV=1	1149800	88511	86252	124600	246450	304850	299140	2.84083	1.50631	0.0011961	2.92223	1	CG8235
tr|A1Z7P1|A1Z7P1_DROME	>tr|A1Z7P1|A1Z7P1_DROME Phosphomannomutase 45A OS=Drosophila melanogaster GN=Pmm45A PE=1 SV=1	1014400	248670	159160	115000	162200	208900	120470	0.94021	-0.0889451	0.835018	0.0783044	0	Pmm45A
tr|Q6NL95|Q6NL95_DROME	>tr|Q6NL95|Q6NL95_DROME Phosphorylated adaptor for RNA export, isoform B OS=Drosophila melanogaster GN=Phax PE=2 SV=1;>tr|A1Z7P3|A1Z7P3_DROME Phosphorylated adaptor for RNA export, isoform A OS=Drosophila melanogaster GN=Phax PE=4 SV=1	63338			34823	28515			0.818855	-0.288319			0	Phax
tr|A1Z7Q8|A1Z7Q8_DROME	>tr|A1Z7Q8|A1Z7Q8_DROME Alicorn, isoform A OS=Drosophila melanogaster GN=alc PE=1 SV=1	87242				87242				10			1	alc
tr|Q7K3S2|Q7K3S2_DROME	>tr|Q7K3S2|Q7K3S2_DROME CG1814, isoform B OS=Drosophila melanogaster GN=CG1814-RB PE=1 SV=1;>tr|A1Z7V8|A1Z7V8_DROME CG1814, isoform C OS=Drosophila melanogaster GN=CG1814 PE=1 SV=1;>tr|A1Z7V9|A1Z7V9_DROME CG1814, isoform A OS=Drosophila melanogaster GN=CG1	136640	76937	59700						-10			-1	CG1814
tr|Q7K2P3|Q7K2P3_DROME	>tr|Q7K2P3|Q7K2P3_DROME CG1648, isoform A OS=Drosophila melanogaster GN=CG1648 PE=1 SV=1;>tr|A1Z7Z4|A1Z7Z4_DROME CG1648, isoform B OS=Drosophila melanogaster GN=CG1648 PE=1 SV=1	10641000	795010	717120	943440	3304000	2276200	2605100	3.33336	1.73698	0.00353218	2.45196	1	CG1648
tr|A1Z803|A1Z803_DROME	>tr|A1Z803|A1Z803_DROME CG1665 OS=Drosophila melanogaster GN=CG1665-RA PE=1 SV=1	174150	53967	37450	42654	40075			0.896726	-0.15726	0.68262	0.165821	0	CG1665
tr|A1Z843|A1Z843_DROME	>tr|A1Z843|A1Z843_DROME CG1371 OS=Drosophila melanogaster GN=CG1371 PE=1 SV=1	29509			29509					-10			-1	CG1371
tr|A1Z850|A1Z850_DROME	>tr|A1Z850|A1Z850_DROME Superoxide dismutase [Cu-Zn] OS=Drosophila melanogaster GN=Ccs PE=1 SV=2;>tr|E1JH26|E1JH26_DROME Superoxide dismutase [Cu-Zn] OS=Drosophila melanogaster GN=Ccs PE=1 SV=1	3169900	310640	114200	263340	1300800	626860	554120	3.60629	1.85052	0.071156	1.14779	0	Ccs
tr|A1Z877|A1Z877_DROME	>tr|A1Z877|A1Z877_DROME LP19846p OS=Drosophila melanogaster GN=Ndg PE=1 SV=1	264900	35100	22908	7861.4	84977	13419	100640	3.02168	1.59535	0.187806	0.726291	0	Ndg
tr|A1Z8D0|A1Z8D0_DROME	>tr|A1Z8D0|A1Z8D0_DROME No child left behind OS=Drosophila melanogaster GN=nclb PE=1 SV=1	3310700	528220	842410	151360	575280	602450	611020	1.17527	0.232993	0.679683	0.167694	0	nclb
tr|J7K3P9|J7K3P9_DROME	>tr|J7K3P9|J7K3P9_DROME AQP7777 transcript variant D OS=Drosophila melanogaster GN=Prip PE=1 SV=1;>tr|A1Z8L8|A1Z8L8_DROME CG7777, isoform A OS=Drosophila melanogaster GN=Prip PE=1 SV=1;>tr|Q95TS2|Q95TS2_DROME CG7777, isoform B OS=Drosophila melanogaster GN	666300	369550	296750						-10			-1	CG7777
tr|A1Z8U0|A1Z8U0_DROME	>tr|A1Z8U0|A1Z8U0_DROME Pre-mRNA processing factor 8 OS=Drosophila melanogaster GN=Prp8 PE=1 SV=1	155930	30386	34589	12267	30227	25445	23012	1.01867	0.0266848	0.94976	0.0223859	0	Prp8
tr|A1Z8U4|A1Z8U4_DROME	>tr|A1Z8U4|A1Z8U4_DROME T-complex chaperonin 5, isoform B OS=Drosophila melanogaster GN=CCT5 PE=1 SV=1;>tr|Q7KKI0|Q7KKI0_DROME GM12270p OS=Drosophila melanogaster GN=CCT5 PE=1 SV=1	14337000	3323400	3469400	1533000	2679600	1727800	1603800	0.721997	-0.469936	0.337846	0.471282	0	Cct5
tr|A1Z8Z9|A1Z8Z9_DROME	>tr|A1Z8Z9|A1Z8Z9_DROME CG8834 OS=Drosophila melanogaster GN=CG8834 PE=1 SV=1	10183000	1279500	1225100	768460	2888500	1843400	2178000	2.11114	1.07802	0.0253025	1.59684	1	CG8834
tr|A1Z909|A1Z909_DROME	>tr|A1Z909|A1Z909_DROME CG8545 OS=Drosophila melanogaster GN=CG8545-RA PE=1 SV=1	363990	20068	23361	11481	177840	67700	63537	5.62879	2.49283	0.087293	1.05902	0	CG8545
tr|A1Z934|A1Z934_DROME	>tr|A1Z934|A1Z934_DROME CG8778 OS=Drosophila melanogaster GN=CG8778 PE=1 SV=1	664880	54078	48569	81843	95359	141060	243970	2.60388	1.38066	0.0941977	1.02596	0	CG8778
tr|A1Z968|A1Z968_DROME	>tr|A1Z968|A1Z968_DROME NAT1, isoform D OS=Drosophila melanogaster GN=NAT1 PE=1 SV=1;>tr|Q0E996|Q0E996_DROME FI23508p1 OS=Drosophila melanogaster GN=NAT1 PE=1 SV=1	32450	14675				9130	8645.2	0.605629	-0.723495	0.0461031	1.33627	0	NAT1
tr|A1Z992|A1Z992_DROME	>tr|A1Z992|A1Z992_DROME 1,4-Alpha-Glucan branching enzyme OS=Drosophila melanogaster GN=AGBE PE=1 SV=1	61085000	12665000	10625000	7700100	11284000	9604100	9206800	0.971113	-0.0422884	0.858973	0.0660202	0	AGBE
tr|A1Z9B8|A1Z9B8_DROME	>tr|A1Z9B8|A1Z9B8_DROME CG4734 OS=Drosophila melanogaster GN=CG4734 PE=4 SV=1	223930	99143	124790						-10			-1	CG4734
tr|A1Z9E3|A1Z9E3_DROME	>tr|A1Z9E3|A1Z9E3_DROME Elongation factor Tu OS=Drosophila melanogaster GN=mEFTu1 PE=1 SV=1	10363000	509900	990210	863110	4218400	2014700	1766200	3.38492	1.75912	0.0767533	1.1149	0	EfTuM
tr|A1Z9G2|A1Z9G2_DROME	>tr|A1Z9G2|A1Z9G2_DROME FI18620p1 OS=Drosophila melanogaster GN=fand PE=1 SV=1	331750				161750	90073	79933		10			1	fand
tr|A1Z9J3|A1Z9J3_DROME	>tr|A1Z9J3|A1Z9J3_DROME Short stop, isoform H OS=Drosophila melanogaster GN=shot PE=1 SV=1	30409				4485.6	15743	10180		10			1	shot
tr|A1Z9J6|A1Z9J6_DROME	>tr|A1Z9J6|A1Z9J6_DROME Mitochondrial ribosomal protein L53 OS=Drosophila melanogaster GN=mRpL53 PE=1 SV=1	73249		73249						-10			-1	mRpL53
tr|A1Z9M5|A1Z9M5_DROME	>tr|A1Z9M5|A1Z9M5_DROME Uncharacterized protein OS=Drosophila melanogaster GN=CG30069 PE=1 SV=1	263160	5710.6	8773.7	6049.1	89673	62155	90797	11.8161	3.56268	0.00141407	2.84953	1	CG30069
tr|A1ZA22|A1ZA22_DROME	>tr|A1ZA22|A1ZA22_DROME eIF2B-gamma OS=Drosophila melanogaster GN=eIF2Bgamma PE=1 SV=1	249770	45816			203950			4.4515	2.15429			0	eIF2B-gamma
tr|A1ZA73|A1ZA73_DROME	>tr|A1ZA73|A1ZA73_DROME Stretchin-Mlck, isoform R OS=Drosophila melanogaster GN=Strn-Mlck PE=1 SV=2	4574500	209920	265000	195710	1640700	1096800	1166400	5.82124	2.54133	0.0033232	2.47844	1	Strn-Mlck
tr|A1ZA83|A1ZA83_DROME	>tr|A1ZA83|A1ZA83_DROME CG8397 OS=Drosophila melanogaster GN=CG8397 PE=1 SV=1	114930					114930			10			1	CG8397
tr|Q7K221|Q7K221_DROME	>tr|Q7K221|Q7K221_DROME Glutamate oxaloacetate transaminase 1, isoform A OS=Drosophila melanogaster GN=Got1 PE=1 SV=1;>tr|A1ZAA5|A1ZAA5_DROME Glutamate oxaloacetate transaminase 1, isoform B OS=Drosophila melanogaster GN=Got1 PE=1 SV=1	5956300	1053500	1123700	836840	1134200	866210	941750	0.976152	-0.0348229	0.848437	0.0713806	0	Got1
tr|A1ZAH1|A1ZAH1_DROME	>tr|A1ZAH1|A1ZAH1_DROME CG7813 OS=Drosophila melanogaster GN=CG7813-RA PE=2 SV=1	333940	88786	144670	93300			7180	0.0659207	-3.92312	0.104957	0.978987	0	CG7813
tr|A1ZAH8|A1ZAH8_DROME	>tr|A1ZAH8|A1ZAH8_DROME Ribosomal protein S15, isoform B OS=Drosophila melanogaster GN=RpS15 PE=1 SV=1;>tr|Q7JZW2|Q7JZW2_DROME GEO07301p1 OS=Drosophila melanogaster GN=RpS15 PE=1 SV=1	4854500	82827	129020	420220	1763800	1059600	1399000	6.6803	2.73991	0.00641277	2.19295	1	RpS15
tr|A1ZAK4|A1ZAK4_DROME	>tr|A1ZAK4|A1ZAK4_DROME Dek, isoform A OS=Drosophila melanogaster GN=Dek PE=1 SV=1;>tr|A1ZAK3|A1ZAK3_DROME Dek, isoform C OS=Drosophila melanogaster GN=Dek PE=1 SV=1;>tr|Q8T0D3|Q8T0D3_DROME Dek, isoform B OS=Drosophila melanogaster GN=Dek PE=1 SV=1;>tr|Q8I	956530	151820	203110	60406	342840	113250	85109	1.30304	0.38188	0.670968	0.173298	0	Dek
tr|A1ZAK7|A1ZAK7_DROME	>tr|A1ZAK7|A1ZAK7_DROME LD35640p OS=Drosophila melanogaster GN=Psi PE=1 SV=1;>tr|A1ZAK8|A1ZAK8_DROME p-element somatic inhibitor, isoform C OS=Drosophila melanogaster GN=Psi PE=1 SV=1;>tr|A1ZAK9|A1ZAK9_DROME p-element somatic inhibitor, isoform A OS=Drosop	507920	11980	45143		184910	163050	102830	5.26104	2.39535	0.0373245	1.42801	1	Psi
tr|Q7K5N8|Q7K5N8_DROME	>tr|Q7K5N8|Q7K5N8_DROME CG4847, isoform A OS=Drosophila melanogaster GN=CG4847 PE=1 SV=1;>tr|A1ZAU4|A1ZAU4_DROME CG4847, isoform D OS=Drosophila melanogaster GN=CG4847-RD PE=1 SV=1	3005300	426240	324700	279580	995140	502320	477350	1.91632	0.938341	0.144855	0.839068	0	CG4847
tr|A1ZB68|A1ZB68_DROME	>tr|A1ZB68|A1ZB68_DROME FI01423p OS=Drosophila melanogaster GN=GstE3 PE=1 SV=1	998420	578750			216980	91558	111130	0.241709	-2.04865	0.0301037	1.52138	-1	GstE3
tr|A1ZB71|A1ZB71_DROME	>tr|A1ZB71|A1ZB71_DROME Glutathione S transferase E6 OS=Drosophila melanogaster GN=GstE6 PE=1 SV=1	2505400	981800	422990	692920	133350	139240	135060	0.194331	-2.36341	0.0250912	1.60048	-1	GstE6
tr|A8E6M1|A8E6M1_DROME	>tr|A8E6M1|A8E6M1_DROME GH01011p OS=Drosophila melanogaster GN=CG30122 PE=1 SV=1;>tr|A1ZBB4|A1ZBB4_DROME Uncharacterized protein, isoform B OS=Drosophila melanogaster GN=CG30122 PE=1 SV=1;>tr|E1JGL8|E1JGL8_DROME Uncharacterized protein, isoform C OS=Drosop	3567900	354450	280730	318640	1151900	764660	697520	2.74064	1.45451	0.0180726	1.74298	1	CG30122
tr|A1ZBE9|A1ZBE9_DROME	>tr|A1ZBE9|A1ZBE9_DROME Methionyl-tRNA synthetase OS=Drosophila melanogaster GN=MetRS PE=1 SV=1	978960	114150	77721	126440	234910	189290	236440	2.07545	1.05343	0.00584661	2.2331	1	MetRS
tr|A1ZBJ2|A1ZBJ2_DROME	>tr|A1ZBJ2|A1ZBJ2_DROME CG7461, isoform B OS=Drosophila melanogaster GN=CG7461 PE=1 SV=2	8829200	1929400	1642900	1159100	1859700	915080	1323000	0.866082	-0.207425	0.582928	0.234385	0	CG7461
tr|A1ZBK7|A1ZBK7_DROME	>tr|A1ZBK7|A1ZBK7_DROME Crammer OS=Drosophila melanogaster GN=cer PE=1 SV=1	2941600	603790	597540		1077600	349240	313400	0.96573	-0.0503087	0.952966	0.0209227	0	cer
tr|A1ZBM2|A1ZBM2_DROME	>tr|A1ZBM2|A1ZBM2_DROME Tubulin-binding cofactor B OS=Drosophila melanogaster GN=TBCB PE=1 SV=1	1000300	75391		221950	279100	225180	198660	1.57606	0.656321	0.264644	0.577338	0	TBCB
tr|A1ZBU5|A1ZBU5_DROME	>tr|A1ZBU5|A1ZBU5_DROME GNBP-like 3 OS=Drosophila melanogaster GN=GNBP-like3 PE=4 SV=1	14615000				5845300	4240900	4528900		10			1	GNBP-like3
tr|A1ZBU8|A1ZBU8_DROME	>tr|A1ZBU8|A1ZBU8_DROME Uncharacterized protein, isoform A OS=Drosophila melanogaster GN=CG18067 PE=1 SV=1	330250000	12738000	10194000	10503000	113250000	98124000	85442000	8.8774	3.15014	0.000406744	3.39068	1	CG18067
tr|E1JGN7|E1JGN7_DROME	>tr|E1JGN7|E1JGN7_DROME Heterogeneous nuclear ribonucleoprotein K, isoform E OS=Drosophila melanogaster GN=HnRNP-K PE=1 SV=1;>tr|A1ZBW1|A1ZBW1_DROME Heterogeneous nuclear ribonucleoprotein K, isoform A OS=Drosophila melanogaster GN=HnRNP-K PE=1 SV=1;>tr|A1	156540	39497	40831	76211					-10			-1	HnRNP-K
tr|A4V110|A4V110_DROME	>tr|A4V110|A4V110_DROME Calcium/calmodulin-dependent protein kinase I, isoform I OS=Drosophila melanogaster GN=CaMKI PE=1 SV=1;>tr|Q7JMV3|Q7JMV3_DROME Calcium/calmodulin dependent protein kinase I OS=Drosophila melanogaster GN=CaMKI PE=1 SV=1	531190	48128		49520	280740	73961	78842	2.9599	1.56555	0.356204	0.448301	0	CaMKI
tr|Q0E924|Q0E924_DROME	>tr|Q0E924|Q0E924_DROME LD46344p OS=Drosophila melanogaster GN=Phb2 PE=1 SV=2;>tr|A8DYI7|A8DYI7_DROME Prohibitin 2, isoform D OS=Drosophila melanogaster GN=Phb2 PE=1 SV=1;>tr|A8DYI6|A8DYI6_DROME Prohibitin 2, isoform E OS=Drosophila melanogaster GN=Phb2 PE	1263900	285630	337310	329900	67677	169830	73582	0.326486	-1.61491	0.00437308	2.35921	-1	Phb2
tr|O61380|O61380_DROME	>tr|O61380|O61380_DROME Eukaryotic translation initiation factor 4G, isoform A OS=Drosophila melanogaster GN=eIF4G1 PE=1 SV=3;>tr|A8DZ29|A8DZ29_DROME Eukaryotic translation initiation factor 4G, isoform B OS=Drosophila melanogaster GN=eIF4G1 PE=1 SV=1	2957100	355740	365260	233060	753850	626230	623000	2.09953	1.07007	0.00446984	2.34971	1	eIF4G
tr|Q9VNR7|Q9VNR7_DROME	>tr|Q9VNR7|Q9VNR7_DROME FI06595p OS=Drosophila melanogaster GN=Dmel\CG11241 PE=1 SV=3;>tr|A8E6R2|A8E6R2_DROME IP18034p OS=Drosophila melanogaster GN=Dmel\CG11241 PE=1 SV=1	74790	22650	32155	19985					-10			-1	CG11241
tr|Q9VZQ3|Q9VZQ3_DROME	>tr|Q9VZQ3|Q9VZQ3_DROME Karst, isoform A OS=Drosophila melanogaster GN=kst PE=1 SV=1;>tr|Q7KV69|Q7KV69_DROME Karst, isoform B OS=Drosophila melanogaster GN=kst PE=1 SV=1;>tr|Q7KV70|Q7KV70_DROME Karst, isoform C OS=Drosophila melanogaster GN=kst PE=1 SV=1;>	604510	72105	59077	75100	145130	114360	138730	1.93046	0.948948	0.00378022	2.42248	0	kst
tr|Q8IRC1|Q8IRC1_DROME	>tr|Q8IRC1|Q8IRC1_DROME Ensconsin, isoform C OS=Drosophila melanogaster GN=ens PE=1 SV=2;>tr|F2FB68|F2FB68_DROME Ensconsin, isoform H OS=Drosophila melanogaster GN=ens PE=1 SV=1;>tr|Q9VZI0|Q9VZI0_DROME Ensconsin, isoform B OS=Drosophila melanogaster GN=ens	603080	43914	100030		361020	39602	58518	2.12648	1.08846	0.593192	0.226805	0	ens
tr|Q9V3C7|Q9V3C7_DROME	>tr|Q9V3C7|Q9V3C7_DROME Inhibitor-2 OS=Drosophila melanogaster GN=I-2 PE=1 SV=1;>tr|A8JNP7|A8JNP7_DROME Inhibitor-2, isoform B OS=Drosophila melanogaster GN=I-2 PE=1 SV=1	187600					89161	98437		10			1	I-2
tr|A8JNT6|A8JNT6_DROME	>tr|A8JNT6|A8JNT6_DROME Myosin binding subunit, isoform F OS=Drosophila melanogaster GN=Mbs PE=1 SV=1;>tr|Q9VUX7|Q9VUX7_DROME GH16214p OS=Drosophila melanogaster GN=Mbs PE=1 SV=1;>tr|A8JNT5|A8JNT5_DROME Myosin binding subunit, isoform G OS=Drosophila melan	173100	33810	14010	18934	37868	39658	28818	1.59307	0.671812	0.125588	0.901051	0	Mbs
tr|A8JNU6|A8JNU6_DROME	>tr|A8JNU6|A8JNU6_DROME Neural conserved at 73EF, isoform I OS=Drosophila melanogaster GN=Nc73EF PE=1 SV=1	26327000	3016900	3145200	3314400	7141900	4605200	5103400	1.77814	0.830365	0.0345713	1.46128	0	Nc73EF
tr|M9PIL3|M9PIL3_DROME	>tr|M9PIL3|M9PIL3_DROME ADP-ribosylation factor GTPase activating protein 3, isoform G OS=Drosophila melanogaster GN=ArfGAP3 PE=1 SV=1;>tr|Q9VNS2|Q9VNS2_DROME ADP-ribosylation factor GTPase activating protein 3, isoform A OS=Drosophila melanogaster GN=ArfG	1167100	45925	107300	71760	464590	224960	252510	4.18721	2.06599	0.0371613	1.42991	1	ArfGAP3
tr|A8JQT5|A8JQT5_DROME	>tr|A8JQT5|A8JQT5_DROME Chondrocyte-derived ezrin-like domain containing protein ortholog, isoform G OS=Drosophila melanogaster GN=Cdep PE=1 SV=2	784450	23490	21395		78754	390530	270280	10.9846	3.45741	0.151842	0.818607	0	Cdep
tr|A8JRB8|A8JRB8_DROME	>tr|A8JRB8|A8JRB8_DROME CG5028, isoform C OS=Drosophila melanogaster GN=CG5028-RC PE=1 SV=1;>tr|A8JRC1|A8JRC1_DROME CG5028, isoform D OS=Drosophila melanogaster GN=CG5028 PE=1 SV=1;>tr|Q8MT18|Q8MT18_DROME CG5028, isoform A OS=Drosophila melanogaster GN=CG5	36084000	5533000	4756000	8753500	6247200	6544200	4250300	0.89493	-0.160154	0.663041	0.17846	0	CG5028
tr|M9PH75|M9PH75_DROME	>tr|M9PH75|M9PH75_DROME Uncharacterized protein, isoform Q OS=Drosophila melanogaster GN=CG34417 PE=1 SV=1;>tr|X2JEC4|X2JEC4_DROME Uncharacterized protein, isoform Y OS=Drosophila melanogaster GN=CG34417 PE=1 SV=1;>tr|A8JUZ9|A8JUZ9_DROME Uncharacterized pr	959980	60365	61826	46041	330000	222720	239030	4.7063	2.23459	0.00352983	2.45225	1	CG34417
tr|Q9W3W1|Q9W3W1_DROME	>tr|Q9W3W1|Q9W3W1_DROME Coronin OS=Drosophila melanogaster GN=pod1 PE=1 SV=1;>tr|A8JV09|A8JV09_DROME Coronin OS=Drosophila melanogaster GN=pod1 PE=1 SV=1;>tr|D6W4T8|D6W4T8_DROME Coronin OS=Drosophila melanogaster GN=pod1 PE=1 SV=1	331740	46351	19632		78978	101430	85351	2.68513	1.42499	0.0243184	1.61406	1	pod1
tr|Q9W3F6|Q9W3F6_DROME	>tr|Q9W3F6|Q9W3F6_DROME CG1440, isoform A OS=Drosophila melanogaster GN=CG1440 PE=1 SV=2;>tr|A8JV22|A8JV22_DROME AT08049p OS=Drosophila melanogaster GN=CG1440-RC PE=1 SV=1;>tr|X2JEJ0|X2JEJ0_DROME CG1440, isoform D OS=Drosophila melanogaster GN=CG1440 PE=1	6635800	1371100	1338200	1255900	944480	991440	734670	0.673507	-0.570235	0.00741172	2.13008	0	CG1440
tr|Q7PLC5|Q7PLC5_DROME	>tr|Q7PLC5|Q7PLC5_DROME Glutamine:fructose-6-phosphate aminotransferase 1, isoform K OS=Drosophila melanogaster GN=Gfat1 PE=1 SV=2;>tr|E8NHS9|E8NHS9_DROME Glutamine:fructose-6-phosphate aminotransferase 1, isoform J OS=Drosophila melanogaster GN=Gfat1 PE=1	472550	97921	60588	40514	137630	73492	62407	1.37436	0.458759	0.437944	0.358581	0	Gfat1
tr|B7YZH7|B7YZH7_DROME	>tr|B7YZH7|B7YZH7_DROME GM12693p OS=Drosophila melanogaster GN=CG8446-RD PE=1 SV=1;>tr|G2J5Z0|G2J5Z0_DROME FI15274p1 OS=Drosophila melanogaster GN=CG8446-RE PE=1 SV=1	786300	163450		188620		213320	220900	1.23333	0.302564	0.0889411	1.0509	0	CG44242
tr|B7YZQ1|B7YZQ1_DROME	>tr|B7YZQ1|B7YZQ1_DROME Sterile20-like kinase, isoform F OS=Drosophila melanogaster GN=Slik PE=1 SV=1;>tr|Q9W179|Q9W179_DROME Sterile20-like kinase, isoform B OS=Drosophila melanogaster GN=Slik PE=1 SV=2;>tr|Q8MLP1|Q8MLP1_DROME Sterile20-like kinase, isofo	215770	18056	12968	25922	81456	36855	40517	2.7891	1.4798	0.0832028	1.07986	0	Slik
tr|Q9VQL7|Q9VQL7_DROME	>tr|Q9VQL7|Q9VQL7_DROME Fatty acid synthase 1, isoform A OS=Drosophila melanogaster GN=FASN1 PE=1 SV=1;>tr|B7Z001|B7Z001_DROME Fatty acid synthase 1, isoform C OS=Drosophila melanogaster GN=FASN1 PE=1 SV=2	94834000	17126000	16303000	15570000	17907000	14152000	13776000	0.935427	-0.0963026	0.491211	0.308732	0	FASN1
tr|Q9VMD7|Q9VMD7_DROME	>tr|Q9VMD7|Q9VMD7_DROME Acyl-coenzyme A oxidase OS=Drosophila melanogaster GN=CG9527 PE=1 SV=3;>tr|B7Z028|B7Z028_DROME Acyl-coenzyme A oxidase OS=Drosophila melanogaster GN=CG9527 PE=1 SV=1	1197500	81086	125230	95269	247380	187450	461060	2.97061	1.57076	0.0779229	1.10833	0	CG9527
tr|Q9VS83|Q9VS83_DROME	>tr|Q9VS83|Q9VS83_DROME CG7546, isoform B OS=Drosophila melanogaster GN=anon-EST:Liang-2.45 PE=1 SV=3;>tr|M9PHN9|M9PHN9_DROME CG7546, isoform F OS=Drosophila melanogaster GN=anon-EST:Liang-2.45 PE=1 SV=1;>tr|M9PBU3|M9PBU3_DROME CG7546, isoform G OS=Drosoph	524370	79202	81113	169790	32829	74583	86856	0.588504	-0.764877	0.254517	0.594283	0	CG7546
tr|Q7KUB0|Q7KUB0_DROME	>tr|Q7KUB0|Q7KUB0_DROME Isocitrate dehydrogenase [NADP] OS=Drosophila melanogaster GN=Idh PE=1 SV=1;>tr|Q8IQA7|Q8IQA7_DROME Isocitrate dehydrogenase [NADP] OS=Drosophila melanogaster GN=Idh PE=1 SV=1;>tr|Q9VSI6|Q9VSI6_DROME Isocitrate dehydrogenase [NADP]	83050000	10599000	11383000	11285000	19516000	14913000	15354000	1.49647	0.581561	0.0207918	1.68211	0	Idh
tr|M9ND61|M9ND61_DROME	>tr|M9ND61|M9ND61_DROME Upstream of N-ras, isoform C OS=Drosophila melanogaster GN=Unr PE=1 SV=1;>tr|Q9VSK3|Q9VSK3_DROME Upstream of N-ras, isoform A OS=Drosophila melanogaster GN=Unr PE=1 SV=2;>tr|B7Z0E2|B7Z0E2_DROME FI18812p1 OS=Drosophila melanogaster G	183700	31519	31626	35480		40929	44140	1.29383	0.371643	0.0184387	1.73427	0	Unr
tr|B7Z0X1|B7Z0X1_DROME	>tr|B7Z0X1|B7Z0X1_DROME Serine hydroxymethyltransferase OS=Drosophila melanogaster GN=CG3011 PE=1 SV=1;>tr|Q9W457|Q9W457_DROME Serine hydroxymethyltransferase OS=Drosophila melanogaster GN=CG3011 PE=1 SV=1	13236000	1911400	1954100	1352200	2994000	2600800	2423300	1.53671	0.619846	0.0221097	1.65542	0	CG3011
tr|M9PHX1|M9PHX1_DROME	>tr|M9PHX1|M9PHX1_DROME Uncharacterized protein, isoform F OS=Drosophila melanogaster GN=CG45002 PE=4 SV=1;>tr|X2JFI2|X2JFI2_DROME Uncharacterized protein, isoform I OS=Drosophila melanogaster GN=CG45002 PE=4 SV=1;>tr|X2JKT7|X2JKT7_DROME Uncharacterized pr	153730	42111	33502		78120			2.06631	1.04706	0.116422	0.933967	0	CG45002
tr|B7Z120|B7Z120_DROME	>tr|B7Z120|B7Z120_DROME Tousled-like kinase, isoform I OS=Drosophila melanogaster GN=Tlk PE=1 SV=1;>tr|Q8IRT7|Q8IRT7_DROME Tousled-like kinase, isoform C OS=Drosophila melanogaster GN=Tlk PE=1 SV=4;>tr|Q1RL19|Q1RL19_DROME LD15160p OS=Drosophila melanogaste	69162				32340		36822		10			1	Tlk
tr|Q9I7R0|Q9I7R0_DROME	>tr|Q9I7R0|Q9I7R0_DROME GH04560p OS=Drosophila melanogaster GN=anon-EST:Posey232 PE=1 SV=1;>tr|C0PDF4|C0PDF4_DROME MIP06482p OS=Drosophila melanogaster GN=CG18815-RA PE=1 SV=1;>tr|M9PEW1|M9PEW1_DROME Uncharacterized protein, isoform E OS=Drosophila melanog	2428900		227510	201990	800830	591440	607140	3.10347	1.63388	0.0140726	1.85163	1	CG18815
tr|Q8SZ28|Q8SZ28_DROME	>tr|Q8SZ28|Q8SZ28_DROME RE21371p OS=Drosophila melanogaster GN=CG3884 PE=1 SV=1;>tr|C6SV36|C6SV36_DROME IP19903p OS=Drosophila melanogaster GN=CG3884-RB PE=1 SV=1	1325600	325630	181740	127740	303740	186750	200030	1.08724	0.120677	0.80406	0.0947115	0	CG44250
tr|D0IQK3|D0IQK3_DROME	>tr|D0IQK3|D0IQK3_DROME AMP deaminase OS=Drosophila melanogaster GN=AMPdeam PE=1 SV=2;>tr|Q961Q7|Q961Q7_DROME AMP deaminase OS=Drosophila melanogaster GN=AMPdeam PE=1 SV=1	73129	19825				20937	32367	1.34436	0.426923	0.615627	0.210682	0	AMPdeam
tr|Q7KQP6|Q7KQP6_DROME	>tr|Q7KQP6|Q7KQP6_DROME Bent, isoform C OS=Drosophila melanogaster GN=bt PE=1 SV=1;>tr|L0MN91|L0MN91_DROME Bent, isoform I OS=Drosophila melanogaster GN=bt PE=1 SV=1;>tr|D1YSG0|D1YSG0_DROME Bent, isoform F OS=Drosophila melanogaster GN=bt PE=1 SV=1;>tr|L0M	655470	47378	40378	37880	235490	136250	158090	4.21718	2.07628	0.0112017	1.95071	1	bt
tr|M9PF42|M9PF42_DROME	>tr|M9PF42|M9PF42_DROME Connector of kinase to AP-1, isoform G OS=Drosophila melanogaster GN=Cka PE=1 SV=1;>tr|Q9VLT9|Q9VLT9_DROME Connector of kinase to AP-1, isoform A OS=Drosophila melanogaster GN=Cka PE=1 SV=2;>tr|M9NEC0|M9NEC0_DROME Connector of kinas	660910	185370	203270	161950		65572	44746	0.300545	-1.73435	0.00505189	2.29655	-1	Cka
tr|D3DMM4|D3DMM4_DROME	>tr|D3DMM4|D3DMM4_DROME MIP15217p OS=Drosophila melanogaster GN=mfas PE=1 SV=1;>tr|Q86B97|Q86B97_DROME Midline fasciclin, isoform H OS=Drosophila melanogaster GN=mfas PE=1 SV=1;>tr|Q9VGE9|Q9VGE9_DROME GH11519p OS=Drosophila melanogaster GN=mfas PE=1 SV=1;>	124730				38518	34799	51417		10			1	mfas
tr|D4G7B1|D4G7B1_DROME	>tr|D4G7B1|D4G7B1_DROME Imaginal disc growth factor 2, isoform B OS=Drosophila melanogaster GN=Idgf2 PE=1 SV=1;>sp|Q9V3D4|IDGF2_DROME Chitinase-like protein Idgf2 OS=Drosophila melanogaster GN=Idgf2 PE=1 SV=1	6229500	921910	959790	837560	1117900	1065900	1326400	1.29087	0.368339	0.0393084	1.40551	0	Idgf2
tr|Q9W043|Q9W043_DROME	>tr|Q9W043|Q9W043_DROME CG5707, isoform A OS=Drosophila melanogaster GN=BEST:HL03644 PE=2 SV=2;>tr|D5SHT6|D5SHT6_DROME CG5707, isoform B OS=Drosophila melanogaster GN=CG5707-RA PE=2 SV=1	466720	135890	81987	56881		88953	103010	1.04799	0.0676293	0.894692	0.0483267	0	CG5707
tr|Q9VM55|Q9VM55_DROME	>tr|Q9VM55|Q9VM55_DROME Uninflatable, isoform B OS=Drosophila melanogaster GN=uif PE=1 SV=3;>tr|E1JHA6|E1JHA6_DROME Uninflatable, isoform C OS=Drosophila melanogaster GN=uif PE=1 SV=1	239740	41899	29376	26698	56232	47619	37912	1.44696	0.533025	0.107801	0.967377	0	uif
tr|Q9VKU1|Q9VKU1_DROME	>tr|Q9VKU1|Q9VKU1_DROME Fatty acid (Long chain) transport protein, isoform A OS=Drosophila melanogaster GN=Fatp PE=1 SV=2;>tr|E1JHE4|E1JHE4_DROME Fatty acid (Long chain) transport protein, isoform F OS=Drosophila melanogaster GN=Fatp PE=1 SV=3	62939	38197		24742					-10			-1	NA
tr|Q9VMW2|Q9VMW2_DROME	>tr|Q9VMW2|Q9VMW2_DROME Reticulon-like protein OS=Drosophila melanogaster GN=Rtnl1 PE=1 SV=1;>tr|Q9VMW4|Q9VMW4_DROME Reticulon-like protein OS=Drosophila melanogaster GN=Rtnl1 PE=1 SV=1;>tr|E1JHT9|E1JHT9_DROME Reticulon-like protein OS=Drosophila melanogas	1275900				207640	454880	613380		10			1	Rtnl1
tr|Q7KUB5|Q7KUB5_DROME	>tr|Q7KUB5|Q7KUB5_DROME Z band alternatively spliced PDZ-motif protein 66, isoform B OS=Drosophila melanogaster GN=Zasp66 PE=1 SV=1;>tr|E1JI76|E1JI76_DROME Z band alternatively spliced PDZ-motif protein 66, isoform M OS=Drosophila melanogaster GN=Zasp66 PE	519190	78444	84635	84051	114070	88468	69518	1.10086	0.138633	0.559197	0.252435	0	Zasp66
tr|E1JI91|E1JI91_DROME	>tr|E1JI91|E1JI91_DROME FI18837p1 OS=Drosophila melanogaster GN=UGP PE=1 SV=1;>tr|Q9VSW1|Q9VSW1_DROME LD13601p OS=Drosophila melanogaster GN=UGP PE=1 SV=2;>tr|A5XCL5|A5XCL5_DROME LD36265p (Fragment) OS=Drosophila melanogaster GN=UGP PE=1 SV=1;>tr|Q9VSW2|Q9	130200000	15062000	18300000	15112000	32654000	23257000	25811000	1.68589	0.753513	0.0210046	1.67768	0	UGP
tr|Q9VDK6|Q9VDK6_DROME	>tr|Q9VDK6|Q9VDK6_DROME tRNA pseudouridine synthase OS=Drosophila melanogaster GN=CG4159 PE=3 SV=1;>tr|E1JIR1|E1JIR1_DROME tRNA pseudouridine synthase OS=Drosophila melanogaster GN=CG4159 PE=3 SV=1	28884	8378.6	7850.1	12655					-10			-1	CG4159
tr|E1JIS2|E1JIS2_DROME	>tr|E1JIS2|E1JIS2_DROME CG7956, isoform E OS=Drosophila melanogaster GN=CG7956 PE=1 SV=1;>tr|Q59DV6|Q59DV6_DROME CG7956, isoform G OS=Drosophila melanogaster GN=CG7956 PE=1 SV=3;>tr|Q9VD98|Q9VD98_DROME CG7956, isoform A OS=Drosophila melanogaster GN=CG7956	59918	30146	17724	12047					-10			-1	CG7956
tr|E1JJA4|E1JJA4_DROME	>tr|E1JJA4|E1JJA4_DROME Shibire, isoform L OS=Drosophila melanogaster GN=shi PE=1 SV=1;>tr|E1JJA5|E1JJA5_DROME Shibire, isoform M OS=Drosophila melanogaster GN=shi PE=1 SV=1;>tr|A4V4I8|A4V4I8_DROME Shibire, isoform F OS=Drosophila melanogaster GN=shi PE=1	4108500	681630	578810	642880	839220	691280	674700	1.15861	0.212391	0.170378	0.768588	0	shi
tr|M9NGK3|M9NGK3_DROME	>tr|M9NGK3|M9NGK3_DROME Terribly reduced optic lobes, isoform AL OS=Drosophila melanogaster GN=trol PE=1 SV=2;>tr|X2JDK9|X2JDK9_DROME Terribly reduced optic lobes, isoform AS OS=Drosophila melanogaster GN=trol PE=1 SV=1;>tr|M9NDM1|M9NDM1_DROME Terribly red	2365100	345690	292720	274730	609370	382330	460230	1.59004	0.669064	0.062094	1.20695	0	trol
tr|E2QCF1|E2QCF1_DROME	>tr|E2QCF1|E2QCF1_DROME ATP-citrate synthase OS=Drosophila melanogaster GN=ATPCL PE=1 SV=1	699440	180570	147260	160460	69738	63455	77961	0.432436	-1.20944	0.000939664	3.02703	-1	ATPCL
tr|E2QCN9|E2QCN9_DROME	>tr|E2QCN9|E2QCN9_DROME GS1-like, isoform B OS=Drosophila melanogaster GN=Gs1l PE=1 SV=1	600720	264330	194790	141600					-10			-1	Gs1l
tr|Q7KN99|Q7KN99_DROME	>tr|Q7KN99|Q7KN99_DROME Phosphopantothenoylcysteine synthetase, isoform A OS=Drosophila melanogaster GN=Ppcs PE=1 SV=1;>tr|E2QD26|E2QD26_DROME Phosphopantothenoylcysteine synthetase, isoform C OS=Drosophila melanogaster GN=Ppcs PE=1 SV=1	2716500	337090	262770	342810	699400	356090	718350	1.88172	0.912051	0.0830303	1.08076	0	Ppcs
tr|Q59DP8|Q59DP8_DROME	>tr|Q59DP8|Q59DP8_DROME Calcium-transporting ATPase OS=Drosophila melanogaster GN=PMCA PE=1 SV=3;>tr|Q59DQ0|Q59DQ0_DROME Calcium-transporting ATPase OS=Drosophila melanogaster GN=PMCA PE=1 SV=3;>tr|E6EK17|E6EK17_DROME Calcium-transporting ATPase OS=Drosoph	641630	58437	53829	107230	215030	96093	111010	1.92319	0.943503	0.175839	0.754884	0	PMCA
tr|Q9W0H2|Q9W0H2_DROME	>tr|Q9W0H2|Q9W0H2_DROME SUMO-related HECT domain and RCC repeat protein for toll pathway activation, isoform A OS=Drosophila melanogaster GN=Sherpa PE=1 SV=2;>tr|E8NHA2|E8NHA2_DROME LD13353p OS=Drosophila melanogaster GN=Sherpa PE=1 SV=1	110700	32797	18862			24010	35028	1.14284	0.192624	0.718189	0.143762	0	CG9153
tr|F0JAF7|F0JAF7_DROME	>tr|F0JAF7|F0JAF7_DROME MIP14774p OS=Drosophila melanogaster GN=Rab35 PE=1 SV=1;>tr|Q9W5X0|Q9W5X0_DROME LD21953p OS=Drosophila melanogaster GN=Rab35 PE=1 SV=1	433870	212470	59665	58526	103210			0.936397	-0.0948076	0.951578	0.0215556	0	Rab35
tr|F3YDK4|F3YDK4_DROME	>tr|F3YDK4|F3YDK4_DROME Purine-rich binding protein-alpha, isoform G OS=Drosophila melanogaster GN=Pur-alpha PE=2 SV=1;>tr|Q8IMC4|Q8IMC4_DROME Purine-rich binding protein-alpha, isoform D OS=Drosophila melanogaster GN=Pur-alpha PE=4 SV=1;>tr|Q95RR6|Q95RR6_	439060	39802	50344	54886		149300	144720	3.04092	1.60451	0.000493071	3.30709	1	Pur-alpha
tr|G2J613|G2J613_DROME	>tr|G2J613|G2J613_DROME MIP32251p1 OS=Drosophila melanogaster GN=CG14442-RA PE=2 SV=1;>tr|Q7YU88|Q7YU88_DROME SD08871p OS=Drosophila melanogaster GN=CG14442 PE=2 SV=1;>tr|X2JIP7|X2JIP7_DROME Uncharacterized protein, isoform E OS=Drosophila melanogaster GN=	1674100			218170	944040	258860	253040	2.22447	1.15346	0.619239	0.208142	0	CG14442
tr|Q95TJ6|Q95TJ6_DROME	>tr|Q95TJ6|Q95TJ6_DROME CG8907, isoform A OS=Drosophila melanogaster GN=CG8907 PE=2 SV=1;>tr|H9ZYQ1|H9ZYQ1_DROME CG8907, isoform B OS=Drosophila melanogaster GN=CG8907-RB PE=2 SV=1	447400	41356	33751	37501	156770	80577	97445	2.97307	1.57196	0.033184	1.47907	1	CG8907
tr|M9MRD9|M9MRD9_DROME	>tr|M9MRD9|M9MRD9_DROME Phosphatidic acid phospholipase A1, isoform B OS=Drosophila melanogaster GN=PAPLA1 PE=1 SV=1;>tr|Q9VLS7|Q9VLS7_DROME LD21067p OS=Drosophila melanogaster GN=PAPLA1 PE=1 SV=1;>tr|X2JDJ3|X2JDJ3_DROME Phosphatidic acid phospholipase A1,	2207700	419500	232490	258970	579030	307380	410310	1.42347	0.509407	0.261369	0.582746	0	PAPLA1
tr|M9MRJ4|M9MRJ4_DROME	>tr|M9MRJ4|M9MRJ4_DROME Muscle-specific protein 300 kDa, isoform G OS=Drosophila melanogaster GN=Msp300 PE=1 SV=1;>tr|M9MSG3|M9MSG3_DROME Muscle-specific protein 300 kDa, isoform E OS=Drosophila melanogaster GN=Msp300 PE=1 SV=1	21628				8177.1	7964	5487.4		10			1	Msp300
tr|M9MRL4|M9MRL4_DROME	>tr|M9MRL4|M9MRL4_DROME Uncharacterized protein OS=Drosophila melanogaster GN=CG42762 PE=4 SV=1	917780				241650	351280	324850		10			1	CG42762
tr|M9MRX0|M9MRX0_DROME	>tr|M9MRX0|M9MRX0_DROME Limpet, isoform J OS=Drosophila melanogaster GN=Lmpt PE=1 SV=1	313970	55508	67093	52494	18182	56984	63705	0.793118	-0.334393	0.462312	0.335065	0	Lmpt
tr|X2JFA0|X2JFA0_DROME	>tr|X2JFA0|X2JFA0_DROME AMP deaminase OS=Drosophila melanogaster GN=AMPdeam PE=1 SV=1;>tr|M9MS55|M9MS55_DROME AMP deaminase OS=Drosophila melanogaster GN=AMPdeam PE=1 SV=1	276600	41245	25051		47663	82469	80171	2.11479	1.08051	0.100162	0.999298	0	AMPdeam
tr|M9MS72|M9MS72_DROME	>tr|M9MS72|M9MS72_DROME Protein kinase, cAMP-dependent, regulatory subunit type 1, isoform X OS=Drosophila melanogaster GN=Pka-R1 PE=1 SV=1;>tr|M9MS37|M9MS37_DROME Protein kinase, cAMP-dependent, regulatory subunit type 1, isoform Z OS=Drosophila melanogas	5581300	360060	379630	617760	988150	1674200	1561500	3.11161	1.63766	0.0137964	1.86023	1	Pka-R1
tr|M9MS77|M9MS77_DROME	>tr|M9MS77|M9MS77_DROME Uncharacterized protein OS=Drosophila melanogaster GN=CG42704 PE=4 SV=1	3131200	1249700	924090	957390					-10			-1	CG42704
tr|M9MS86|M9MS86_DROME	>tr|M9MS86|M9MS86_DROME Mucin related 2B, isoform B OS=Drosophila melanogaster GN=Mur2B PE=4 SV=1;>tr|O76894|O76894_DROME EG:56G7.1 protein OS=Drosophila melanogaster GN=Mur2B PE=4 SV=2	250520	35399	5395.3	97816	38574	29462	43872	0.807357	-0.308721	0.762774	0.117604	0	Mur2B
tr|M9MSL3|M9MSL3_DROME	>tr|M9MSL3|M9MSL3_DROME Hsc70Cb, isoform G OS=Drosophila melanogaster GN=Hsc70Cb PE=1 SV=1	28710000	3356100	3333100	2909800	9226000	4843800	5041400	1.99096	0.993462	0.0918721	1.03682	0	Hsc70Cb
tr|M9PDC7|M9PDC7_DROME	>tr|M9PDC7|M9PDC7_DROME Dynamin associated protein 160, isoform H OS=Drosophila melanogaster GN=Dap160 PE=1 SV=1;>tr|Q8INU2|Q8INU2_DROME Dynamin associated protein 160, isoform B OS=Drosophila melanogaster GN=Dap160 PE=1 SV=1;>tr|M9PBF6|M9PBF6_DROME Dynami	258510	50813	49359	69599	45006	43736		0.784074	-0.350939	0.242965	0.614456	0	Dap160
tr|M9ND37|M9ND37_DROME	>tr|M9ND37|M9ND37_DROME eIF5B, isoform E OS=Drosophila melanogaster GN=eIF5B PE=1 SV=1;>tr|Q9VZP5|Q9VZP5_DROME FI21437p1 OS=Drosophila melanogaster GN=eIF5B PE=1 SV=2;>tr|M9NFL1|M9NFL1_DROME eIF5B, isoform D OS=Drosophila melanogaster GN=eIF5B PE=1 SV=1	1437200	286840	217330	99504	378220	229800	225460	1.38068	0.465378	0.360423	0.443187	0	eIF5B
tr|Q8I0S6|Q8I0S6_DROME	>tr|Q8I0S6|Q8I0S6_DROME AT20009p OS=Drosophila melanogaster GN=fbl PE=1 SV=1;>tr|Q9VPG5|Q9VPG5_DROME Fumble, isoform B OS=Drosophila melanogaster GN=fbl PE=1 SV=1;>tr|Q9VPG4|Q9VPG4_DROME Fumble, isoform A OS=Drosophila melanogaster GN=fbl PE=1 SV=1;>tr|M9N	444570	119640	100890			123310	100730	1.01592	0.0227814	0.915737	0.0382293	0	fbl
tr|M9NDM3|M9NDM3_DROME	>tr|M9NDM3|M9NDM3_DROME Rhea, isoform C OS=Drosophila melanogaster GN=rhea PE=1 SV=1;>tr|M9PEJ8|M9PEJ8_DROME Rhea, isoform H OS=Drosophila melanogaster GN=rhea PE=1 SV=1;>tr|M9PBW9|M9PBW9_DROME Rhea, isoform G OS=Drosophila melanogaster GN=rhea PE=1 SV=1;>	185110	20226	41954	16116	48085	50313	8419.9	1.36428	0.448143	0.579651	0.236833	0	rhea
tr|M9NDZ8|M9NDZ8_DROME	>tr|M9NDZ8|M9NDZ8_DROME Uncharacterized protein OS=Drosophila melanogaster GN=Dmel\CG43074 PE=4 SV=1	496230				301150	195080			10			1	CG43074
tr|Q9VUI8|Q9VUI8_DROME	>tr|Q9VUI8|Q9VUI8_DROME CG5114, isoform A OS=Drosophila melanogaster GN=Dmel\CG5114 PE=1 SV=1;>tr|M9NE98|M9NE98_DROME CG5114, isoform B OS=Drosophila melanogaster GN=Dmel\CG5114 PE=1 SV=1	740450	163130	182120	136360	138280	57666	62891	0.537441	-0.895821	0.0639585	1.1941	0	CG5114
tr|Q9VMH3|Q9VMH3_DROME	>tr|Q9VMH3|Q9VMH3_DROME LD04103p OS=Drosophila melanogaster GN=stai PE=1 SV=2;>tr|Q9GQR5|Q9GQR5_DROME RH02809p OS=Drosophila melanogaster GN=stai PE=1 SV=1;>tr|Q8IPK0|Q8IPK0_DROME Stathmin, isoform B OS=Drosophila melanogaster GN=stai PE=1 SV=1;>tr|M9NEA1|	1299000			232540	505670	226630	334120	1.52865	0.612262	0.528341	0.277086	0	stai
tr|M9NEH6|M9NEH6_DROME	>tr|M9NEH6|M9NEH6_DROME Histone deacetylase OS=Drosophila melanogaster GN=HDAC6 PE=1 SV=1;>tr|M9NGF7|M9NGF7_DROME Histone deacetylase OS=Drosophila melanogaster GN=HDAC6 PE=1 SV=1;>tr|Q86NK9|Q86NK9_DROME Histone deacetylase OS=Drosophila melanogaster GN=HD	3480800	342570	293910	396730	899280	870200	678110	2.36892	1.24423	0.00334793	2.47522	1	HDAC6
tr|M9NFR5|M9NFR5_DROME	>tr|M9NFR5|M9NFR5_DROME Ypsilon schachtel, isoform B OS=Drosophila melanogaster GN=yps PE=1 SV=1;>tr|Q95RE4|Q95RE4_DROME LD37574p OS=Drosophila melanogaster GN=yps PE=1 SV=1	22816000	1855400	1274300	1146200	6811000	5247200	6481900	4.33595	2.11635	0.00081547	3.08859	1	yps
tr|Q9VQL6|Q9VQL6_DROME	>tr|Q9VQL6|Q9VQL6_DROME Fatty acid synthase 2, isoform A OS=Drosophila melanogaster GN=FASN2 PE=1 SV=1;>tr|M9PB21|M9PB21_DROME Fatty acid synthase 2, isoform B OS=Drosophila melanogaster GN=FASN2 PE=1 SV=1	1285700	189130	233920	139360	320810	165200	237250	1.286	0.362892	0.36573	0.436839	0	FASN2
tr|O96607|O96607_DROME	>tr|O96607|O96607_DROME Homer OS=Drosophila melanogaster GN=homer PE=1 SV=1;>tr|Q9VM94|Q9VM94_DROME Homer, isoform B OS=Drosophila melanogaster GN=homer PE=1 SV=1;>tr|M9PB54|M9PB54_DROME Homer, isoform F OS=Drosophila melanogaster GN=homer PE=1 SV=1;>tr|M9	166680					85163	81512		10			1	homer
tr|M9PBI9|M9PBI9_DROME	>tr|M9PBI9|M9PBI9_DROME Sallimus, isoform S OS=Drosophila melanogaster GN=sls PE=4 SV=1;>tr|M9PBJ0|M9PBJ0_DROME Sallimus, isoform X OS=Drosophila melanogaster GN=sls PE=4 SV=1;>tr|M9PGY4|M9PGY4_DROME Sallimus, isoform R OS=Drosophila melanogaster GN=sls PE	792350	59171	57462	58697	245530	181940	189550	3.51919	1.81524	0.00183316	2.7368	1	sls
tr|M9PBV6|M9PBV6_DROME	>tr|M9PBV6|M9PBV6_DROME CG7927, isoform B OS=Drosophila melanogaster GN=anon-WO0172774.138 PE=4 SV=1;>tr|Q9Y109|Q9Y109_DROME BcDNA.GH11023 OS=Drosophila melanogaster GN=BcDNA.GH11023 PE=2 SV=1	74399	7470.9	10334		56593			6.35701	2.66835	0.0330692	1.48058	1	CG7927
tr|Q9VQ94|Q9VQ94_DROME	>tr|Q9VQ94|Q9VQ94_DROME LP05220p OS=Drosophila melanogaster GN=Sec24CD PE=1 SV=2;>tr|M9PC99|M9PC99_DROME Sec24CD ortholog, isoform C OS=Drosophila melanogaster GN=Sec24CD PE=1 SV=1	1828400	281350	336910	355790	355520	214220	284610	0.877111	-0.189169	0.4393	0.357239	0	Sec24CD
tr|M9PCA6|M9PCA6_DROME	>tr|M9PCA6|M9PCA6_DROME Beta galactosidase, isoform B OS=Drosophila melanogaster GN=Gal PE=1 SV=1;>tr|Q9VMJ5|Q9VMJ5_DROME Beta galactosidase, isoform A OS=Drosophila melanogaster GN=Gal PE=1 SV=2	152030			16061	49866	45346	40755	2.82189	1.49666	0.0308303	1.51102	1	Gal
tr|M9PCE5|M9PCE5_DROME	>tr|M9PCE5|M9PCE5_DROME Hemolectin, isoform B OS=Drosophila melanogaster GN=Hml PE=1 SV=1;>tr|Q9VU94|Q9VU94_DROME Hemolectin, isoform A OS=Drosophila melanogaster GN=Hml PE=1 SV=2	444570	49961	60078	38678	115920	116650	63287	1.9894	0.99233	0.0587742	1.23081	0	Hml
tr|M9PCG1|M9PCG1_DROME	>tr|M9PCG1|M9PCG1_DROME Dihydrolipoamide acetyltransferase component of pyruvate dehydrogenase complex OS=Drosophila melanogaster GN=muc PE=1 SV=1;>tr|Q9VM14|Q9VM14_DROME AT21758p OS=Drosophila melanogaster GN=muc PE=1 SV=1;>tr|Q7KTK9|Q7KTK9_DROME CG5261,	89170000	11215000	6755700	6083700	25189000	21536000	18391000	2.70703	1.43671	0.00573419	2.24153	1	CG5261
tr|M9PCY6|M9PCY6_DROME	>tr|M9PCY6|M9PCY6_DROME Uncharacterized protein OS=Drosophila melanogaster GN=CG43796 PE=4 SV=1	3813400	3813400							-10			-1	CG43796
tr|M9PD08|M9PD08_DROME	>tr|M9PD08|M9PD08_DROME Ef1alpha-like factor, isoform C OS=Drosophila melanogaster GN=eRF3 PE=1 SV=1;>tr|Q9VK85|Q9VK85_DROME Ef1alpha-like factor, isoform A OS=Drosophila melanogaster GN=eRF3 PE=1 SV=1	10816000	1445000	1102900	1247000	2651700	2249000	2120400	1.85014	0.887635	0.00464562	2.33296	0	Elf
tr|M9PD73|M9PD73_DROME	>tr|M9PD73|M9PD73_DROME Thioester-containing protein 4, isoform B OS=Drosophila melanogaster GN=Tep4 PE=1 SV=1;>tr|M9PDF6|M9PDF6_DROME Thioester-containing protein 4, isoform D OS=Drosophila melanogaster GN=Tep4 PE=1 SV=1;>tr|Q9VIT9|Q9VIT9_DROME Thioester-	14093000	2449800	2363300	1799000	3351200	2051800	2077500	1.13133	0.178026	0.575157	0.240214	0	Tep4
tr|Q8IP18|Q8IP18_DROME	>tr|Q8IP18|Q8IP18_DROME RH52721p OS=Drosophila melanogaster GN=Tpr2 PE=1 SV=1;>tr|M9PDJ9|M9PDJ9_DROME Tetratricopeptide repeat protein 2, isoform C OS=Drosophila melanogaster GN=Tpr2 PE=1 SV=1;>tr|Q9V3W1|Q9V3W1_DROME Tetratricopeptide repeat protein 2 OS=D	159070	24261	27629			45613	61568	2.06554	1.04652	0.0770601	1.11317	0	Tpr2
tr|M9PDN3|M9PDN3_DROME	>tr|M9PDN3|M9PDN3_DROME Uncharacterized protein, isoform B OS=Drosophila melanogaster GN=Dmel\CG12105 PE=4 SV=1;>tr|Q9W0C9|Q9W0C9_DROME Uncharacterized protein, isoform A OS=Drosophila melanogaster GN=Dmel\CG12105 PE=4 SV=2	57348				26085		31262		10			1	CG12105
tr|Q9VPK3|Q9VPK3_DROME	>tr|Q9VPK3|Q9VPK3_DROME AT24407p OS=Drosophila melanogaster GN=CG18501 PE=2 SV=3;>tr|M9PDQ9|M9PDQ9_DROME Uncharacterized protein, isoform D OS=Drosophila melanogaster GN=CG31974 PE=4 SV=1	266190				139790		126400		10			1	CG31974
tr|M9PGM3|M9PGM3_DROME	>tr|M9PGM3|M9PGM3_DROME Ubr3 ubiquitin ligase, isoform C OS=Drosophila melanogaster GN=Ubr3 PE=1 SV=1;>tr|Q9W3M3|Q9W3M3_DROME Ubr3 ubiquitin ligase, isoform A OS=Drosophila melanogaster GN=Ubr3 PE=1 SV=4;>tr|M9PDZ8|M9PDZ8_DROME Ubr3 ubiquitin ligase, isofo	32788	4167.4	13392	15228					-10			-1	Ubr3
tr|Q9VQB3|Q9VQB3_DROME	>tr|Q9VQB3|Q9VQB3_DROME CG3597, isoform A OS=Drosophila melanogaster GN=CG3597-RA PE=1 SV=1;>tr|M9PE54|M9PE54_DROME CG3597, isoform B OS=Drosophila melanogaster GN=CG3597 PE=1 SV=1	7469000	1936000	1775600	1382100	1157500	507640	710240	0.466337	-1.10056	0.0230934	1.63651	-1	CG3597
tr|M9PE74|M9PE74_DROME	>tr|M9PE74|M9PE74_DROME No circadian temperature entrainment, isoform D OS=Drosophila melanogaster GN=nocte PE=1 SV=1;>tr|Q9W2U7|Q9W2U7_DROME LP18708p OS=Drosophila melanogaster GN=nocte PE=1 SV=4	434890	86067	74772	46176	91577	78499	57794	1.10074	0.138476	0.675394	0.170443	0	nocte
tr|Q7KU82|Q7KU82_DROME	>tr|Q7KU82|Q7KU82_DROME MIP20544p OS=Drosophila melanogaster GN=smid PE=1 SV=2;>tr|M9PEE1|M9PEE1_DROME Smallminded, isoform H OS=Drosophila melanogaster GN=smid PE=1 SV=1;>tr|P91638|P91638_DROME Smallminded protein OS=Drosophila melanogaster GN=smid PE=1 S	54035				54035				10			1	smid
tr|M9PEL6|M9PEL6_DROME	>tr|M9PEL6|M9PEL6_DROME Beta subunit of type I geranylgeranyl transferase, isoform B OS=Drosophila melanogaster GN=betaggt-I PE=4 SV=1;>tr|Q24173|Q24173_DROME Beta subunit of type I geranylgeranyl transferase, isoform A OS=Drosophila melanogaster GN=betagg	239430			18418	129990	55612	35414	4	2	0.438065	0.358462	0	betaggt-I
tr|M9PHS3|M9PHS3_DROME	>tr|M9PHS3|M9PHS3_DROME Autophagy-related 18a, isoform F OS=Drosophila melanogaster GN=Atg18a PE=1 SV=1;>tr|Q9VSF0|Q9VSF0_DROME Autophagy-related 18a, isoform A OS=Drosophila melanogaster GN=Atg18a PE=1 SV=2;>tr|M9PEY7|M9PEY7_DROME Autophagy-related 18a, i	283480	78417				152890	52176	1.30754	0.38685	0.828269	0.0818285	0	Atg18a
tr|M9PF54|M9PF54_DROME	>tr|M9PF54|M9PF54_DROME Z band alternatively spliced PDZ-motif protein 67, isoform D OS=Drosophila melanogaster GN=Zasp67 PE=4 SV=1;>tr|X2JGI5|X2JGI5_DROME Z band alternatively spliced PDZ-motif protein 67, isoform H OS=Drosophila melanogaster GN=Zasp67 PE	7325600	86879	79500	37314	2318600	1973200	2830100	34.9639	5.12779	0.0007604	3.11896	1	Zasp67
tr|Q9VTZ0|Q9VTZ0_DROME	>tr|Q9VTZ0|Q9VTZ0_DROME GH08269p OS=Drosophila melanogaster GN=tral PE=1 SV=3;>tr|M9PI44|M9PI44_DROME Trailer hitch, isoform F OS=Drosophila melanogaster GN=tral PE=1 SV=1;>tr|M9PF14|M9PF14_DROME Trailer hitch, isoform C OS=Drosophila melanogaster GN=tral	14405000	1785600	1510800	1668000	3397300	2607900	3435600	1.9017	0.92729	0.00606466	2.21719	0	tral
tr|M9PF46|M9PF46_DROME	>tr|M9PF46|M9PF46_DROME CG6767, isoform G OS=Drosophila melanogaster GN=Dmel\CG6767 PE=1 SV=1;>tr|Q9VT33|Q9VT33_DROME CG6767, isoform B OS=Drosophila melanogaster GN=Dmel\CG6767 PE=1 SV=3;>tr|Q9VT32|Q9VT32_DROME CG6767, isoform A OS=Drosophila melanogaster	5700800	1016400	1185900	991040	684880	872060	950550	0.785225	-0.348822	0.0836941	1.07731	0	CG6767
tr|Q9VTK9|Q9VTK9_DROME	>tr|Q9VTK9|Q9VTK9_DROME CG6084, isoform A OS=Drosophila melanogaster GN=34F4T PE=1 SV=2;>tr|M9PF61|M9PF61_DROME CG6084, isoform C OS=Drosophila melanogaster GN=34F4T PE=1 SV=1	90578000	13928000	12719000	12247000	22334000	15419000	13930000	1.32882	0.410142	0.181274	0.741664	0	CG6084
tr|M9PFF1|M9PFF1_DROME	>tr|M9PFF1|M9PFF1_DROME ADP-ribosylation factor GTPase activating protein 1, isoform B OS=Drosophila melanogaster GN=ArfGAP1 PE=1 SV=1;>tr|Q9VTX5|Q9VTX5_DROME ADP-ribosylation factor GTPase activating protein 1, isoform A OS=Drosophila melanogaster GN=ArfG	472440	90410	44974	59921	277130			4.25688	2.0898	0.0155344	1.8087	1	ArfGAP1
tr|Q9XZ03|Q9XZ03_DROME	>tr|Q9XZ03|Q9XZ03_DROME Multiprotein Bridging Factor 1 OS=Drosophila melanogaster GN=mbf1 PE=1 SV=1;>tr|M9PFR6|M9PFR6_DROME Multiprotein bridging factor 1, isoform E OS=Drosophila melanogaster GN=mbf1 PE=1 SV=1	139170			36151	27296	29591	46137	0.949941	-0.0740895	0.892816	0.0492379	0	mbf1
tr|Q9Y102|Q9Y102_DROME	>tr|Q9Y102|Q9Y102_DROME BcDNA.GH11973 OS=Drosophila melanogaster GN=rgn PE=1 SV=1;>tr|M9PFV8|M9PFV8_DROME Regeneration, isoform B OS=Drosophila melanogaster GN=rgn PE=1 SV=1	187770	12077	14493	14935	82782		63488	5.28623	2.40224	0.00387125	2.41215	1	rgn
tr|M9PFX9|M9PFX9_DROME	>tr|M9PFX9|M9PFX9_DROME Limpet, isoform N OS=Drosophila melanogaster GN=Lmpt PE=1 SV=1;>tr|Q8IQQ3|Q8IQQ3_DROME Limpet, isoform D OS=Drosophila melanogaster GN=Lmpt PE=1 SV=1;>tr|Q9VVB5|Q9VVB5_DROME LD46723p OS=Drosophila melanogaster GN=Lmpt PE=1 SV=2;>tr|	48320					48320			10			1	Lmpt
tr|Q7KTV5|Q7KTV5_DROME	>tr|Q7KTV5|Q7KTV5_DROME Nopp140, isoform B OS=Drosophila melanogaster GN=Nopp140 PE=1 SV=1;>tr|M9PFZ1|M9PFZ1_DROME Nopp140, isoform E OS=Drosophila melanogaster GN=Nopp140 PE=1 SV=1;>tr|M9MSM4|M9MSM4_DROME Nopp140, isoform F OS=Drosophila melanogaster GN=N	353640			21072	91865	118890	121810	5.26077	2.39527	0.042252	1.37415	1	Nopp140
tr|M9PG40|M9PG40_DROME	>tr|M9PG40|M9PG40_DROME Uncharacterized protein, isoform D OS=Drosophila melanogaster GN=BcDNA:RE63412 PE=1 SV=1;>tr|Q8SYG3|Q8SYG3_DROME RE63412p OS=Drosophila melanogaster GN=BcDNA:RE63412 PE=1 SV=1;>tr|M9PDD4|M9PDD4_DROME Uncharacterized protein, isoform	7679200	2242900	1550900	247480	2515500	620220	502320	0.90022	-0.151651	0.885504	0.0528095	0	CG40045
tr|M9PG67|M9PG67_DROME	>tr|M9PG67|M9PG67_DROME CG5618, isoform D OS=Drosophila melanogaster GN=Dmel\CG5618 PE=1 SV=1;>tr|Q9VPH6|Q9VPH6_DROME CG5618, isoform A OS=Drosophila melanogaster GN=Dmel\CG5618 PE=1 SV=1	2881000	612160	535410	569000	395010	358760	410610	0.678318	-0.559967	0.0024222	2.61579	0	CG5618
tr|M9PGB6|M9PGB6_DROME	>tr|M9PGB6|M9PGB6_DROME CG7519, isoform B OS=Drosophila melanogaster GN=Dmel\CG7519 PE=1 SV=1;>tr|Q9VP29|Q9VP29_DROME CG7519, isoform A OS=Drosophila melanogaster GN=Dmel\CG7519 PE=1 SV=1	402590	114630	157730	61904		68320		0.613168	-0.705646	0.518114	0.285574	0	CG7519
tr|M9PGD7|M9PGD7_DROME	>tr|M9PGD7|M9PGD7_DROME Uncharacterized protein, isoform B OS=Drosophila melanogaster GN=CG10802 PE=1 SV=1;>tr|Q9W4R9|Q9W4R9_DROME LD13611p OS=Drosophila melanogaster GN=CG10802 PE=1 SV=2	333450	116400	84594	80681		23934	27836	0.27569	-1.85888	0.0189275	1.72291	-1	CG10802
tr|M9PGG8|M9PGG8_DROME	>tr|M9PGG8|M9PGG8_DROME Uncharacterized protein, isoform B OS=Drosophila melanogaster GN=CG17493 PE=1 SV=1	461710					112120	349590		10			1	CG17493
tr|Q9VXE7|Q9VXE7_DROME	>tr|Q9VXE7|Q9VXE7_DROME CG9784, isoform A OS=Drosophila melanogaster GN=CG9784 PE=1 SV=1;>tr|M9PHS8|M9PHS8_DROME CG9784, isoform C OS=Drosophila melanogaster GN=CG9784 PE=1 SV=1	294780	55405	63130	148050	8448.4	8413.2	11331	0.105755	-3.24121	0.0554519	1.25608	0	CG9784
tr|M9PI17|M9PI17_DROME	>tr|M9PI17|M9PI17_DROME CG6084, isoform D OS=Drosophila melanogaster GN=34F4T PE=1 SV=1;>tr|Q8IQF8|Q8IQF8_DROME AT18092p OS=Drosophila melanogaster GN=34F4T PE=1 SV=1	1337800				655070	682710			10			1	CG6084
tr|Q9VVV6|Q9VVV6_DROME	>tr|Q9VVV6|Q9VVV6_DROME LD45843p OS=Drosophila melanogaster GN=Dmel\CG18135 PE=1 SV=2;>tr|M9PI96|M9PI96_DROME Uncharacterized protein, isoform E OS=Drosophila melanogaster GN=Dmel\CG18135 PE=1 SV=1;>tr|Q9VVV5|Q9VVV5_DROME Uncharacterized protein, isoform A	24420000	4922700	4522800	4167300	4160300	2876800	3770300	0.793915	-0.332944	0.099699	1.00131	0	CG18135
tr|M9PIC3|M9PIC3_DROME	>tr|M9PIC3|M9PIC3_DROME CG4825, isoform B OS=Drosophila melanogaster GN=Dmel\CG4825 PE=1 SV=1;>tr|Q9VPD3|Q9VPD3_DROME CG4825, isoform A OS=Drosophila melanogaster GN=Dmel\CG4825 PE=1 SV=1	16433	16433							-10			-1	CG4825
tr|M9PIF1|M9PIF1_DROME	>tr|M9PIF1|M9PIF1_DROME CG7324, isoform B OS=Drosophila melanogaster GN=Dmel\CG7324 PE=1 SV=1;>tr|Q9VP46|Q9VP46_DROME CG7324, isoform A OS=Drosophila melanogaster GN=Dmel\CG7324 PE=1 SV=1	50725	12674	19023	19028					-10			-1	CG7324
tr|O16043|O16043_DROME	>tr|O16043|O16043_DROME Anon1A4 OS=Drosophila melanogaster GN=Df31 PE=1 SV=1	1404500	217640	85299		462880	334100	304620	2.42425	1.27754	0.0735697	1.1333	0	Df31
tr|O16158|O16158_DROME	>tr|O16158|O16158_DROME Calcium-binding protein OS=Drosophila melanogaster GN=Scp2 PE=1 SV=1	4081000	1114600	812040	1220100	504570	254150	175590	0.296914	-1.75188	0.00942294	2.02581	-1	Scp2
tr|O18332|O18332_DROME	>tr|O18332|O18332_DROME FI01544p OS=Drosophila melanogaster GN=Rab1 PE=1 SV=1	25618000	6691600	4482400	4945100	4133800	2795400	2570300	0.589332	-0.762848	0.0566774	1.24659	0	Rab1
tr|O18333|O18333_DROME	>tr|O18333|O18333_DROME GH01619p OS=Drosophila melanogaster GN=Rab2 PE=1 SV=1	3666800	540910	884790	323340	942130	491020	484640	1.09648	0.132881	0.813136	0.089837	0	Rab2
tr|O18335|O18335_DROME	>tr|O18335|O18335_DROME Drab11 OS=Drosophila melanogaster GN=Rab11 PE=1 SV=1	19179000	4387100	3634700	2762600	3002500	2423000	2968700	0.778365	-0.361481	0.190157	0.720888	0	Rab11
tr|O18336|O18336_DROME	>tr|O18336|O18336_DROME MIP20481p OS=Drosophila melanogaster GN=Rab14 PE=1 SV=1;>tr|Q86BK8|Q86BK8_DROME Rab14, isoform B OS=Drosophila melanogaster GN=Rab14 PE=1 SV=1	66140	66140							-10			-1	Rab14
tr|O18338|O18338_DROME	>tr|O18338|O18338_DROME LD44762p OS=Drosophila melanogaster GN=Rab8 PE=1 SV=1;>tr|M9NEE8|M9NEE8_DROME Rab8, isoform B OS=Drosophila melanogaster GN=Rab8 PE=1 SV=1;>tr|O15971|O15971_DROME LD39986p OS=Drosophila melanogaster GN=Rab10 PE=1 SV=1	1189500	639930	549620						-10			-1	Rab8
tr|O44226|O44226_DROME	>tr|O44226|O44226_DROME Elongin B OS=Drosophila melanogaster GN=EloB PE=1 SV=1	59919		59919						-10			-1	EloB
tr|O46050|O46050_DROME	>tr|O46050|O46050_DROME EG:152A3.1 protein OS=Drosophila melanogaster GN=Nmd3 PE=1 SV=1	182920		13182	85345		49720	34678	0.856598	-0.22331	0.865695	0.0626353	0	Nmd3
tr|O46067|O46067_DROME	>tr|O46067|O46067_DROME CG2918, isoform A OS=Drosophila melanogaster GN=EG:25E8.1 PE=1 SV=1	729930	160920	146010	68422	78912	135720	139940	0.944639	-0.0821656	0.851833	0.0696454	0	CG2918
tr|O46079|O46079_DROME	>tr|O46079|O46079_DROME CG3587 OS=Drosophila melanogaster GN=EG:39E1.2 PE=1 SV=1	65771			65771					-10			-1	CG3587
tr|O61351|O61351_DROME	>tr|O61351|O61351_DROME La costa OS=Drosophila melanogaster GN=lcs PE=4 SV=1	19402000				7827900	6266900	5307500		10			1	lcs
tr|O61444|O61444_DROME	>tr|O61444|O61444_DROME MAP kinase kinase 4, isoform A OS=Drosophila melanogaster GN=Mkk4 PE=1 SV=1	145590	24328		50899		37394	32968	0.935329	-0.0964541	0.873321	0.058826	0	Mkk4
tr|Q8IQZ8|Q8IQZ8_DROME	>tr|Q8IQZ8|Q8IQZ8_DROME FI20019p1 OS=Drosophila melanogaster GN=Fim PE=1 SV=1;>tr|O61604|O61604_DROME Fimbrin OS=Drosophila melanogaster GN=Fim PE=1 SV=1;>tr|Q8IQZ7|Q8IQZ7_DROME FI19014p1 OS=Drosophila melanogaster GN=Fim PE=1 SV=1	2319800	401570	432850	295690	607780	266970	314960	1.05274	0.0741467	0.870466	0.0602482	0	Fim
tr|O62530|O62530_DROME	>tr|O62530|O62530_DROME Adaptor protein complex 2, mu subunit, isoform A OS=Drosophila melanogaster GN=AP-2mu PE=1 SV=1	1487100	308670	395190	273310	256820	117640	135430	0.521803	-0.938424	0.0517117	1.28641	0	AP-2mu
tr|O62531|O62531_DROME	>tr|O62531|O62531_DROME Adaptor protein complex 1, mu subunit OS=Drosophila melanogaster GN=AP-1mu PE=1 SV=1	159220	61469	33110	27914	36730			0.899562	-0.152706	0.862276	0.0643535	0	AP-1mu
tr|O62602|O62602_DROME	>tr|O62602|O62602_DROME Licorne OS=Drosophila melanogaster GN=lic PE=1 SV=1	2142300	511940	461750	502390	327470	88166	250600	0.451355	-1.14767	0.0201373	1.696	-1	lic
tr|O76521|O76521_DROME	>tr|O76521|O76521_DROME Importin subunit alpha OS=Drosophila melanogaster GN=Kap-alpha1 PE=2 SV=1	234810	52903		73254		38603	70050	0.861252	-0.215492	0.686253	0.163516	0	Kap-alpha1
tr|O76742|O76742_DROME	>tr|O76742|O76742_DROME CG5915 protein OS=Drosophila melanogaster GN=Rab7 PE=1 SV=1	4166900	778790	834090	842930	444420	675600	591100	0.696764	-0.521258	0.0243783	1.613	0	Rab7
tr|O76752|O76752_DROME	>tr|O76752|O76752_DROME CG12117-PA OS=Drosophila melanogaster GN=Sptr PE=1 SV=1	3950800	320260	339730	342380	1228200	1001300	719000	2.94153	1.55657	0.011695	1.932	1	Sptr
tr|Q8IH14|Q8IH14_DROME	>tr|Q8IH14|Q8IH14_DROME LD21345p OS=Drosophila melanogaster GN=ssx PE=1 SV=1;>tr|O76876|O76876_DROME EG:132E8.1 protein OS=Drosophila melanogaster GN=ssx PE=1 SV=1	265500				136350	61854	67302		10			1	ssx
tr|O76904|O76904_DROME	>tr|O76904|O76904_DROME EG:8D8.1 protein OS=Drosophila melanogaster GN=fs(1)N PE=2 SV=1	626820	8050.2	6465.5	5746.6	606550			89.8047	6.48872	5.14832e-06	5.28833	1	fs(1)N
tr|O77062|O77062_DROME	>tr|O77062|O77062_DROME Amino acid transporter OS=Drosophila melanogaster GN=Eaat1 PE=1 SV=1	265840		122560	97195	46081			0.419385	-1.25365	0.21111	0.675492	0	Eaat1
tr|O77134|O77134_DROME	>tr|O77134|O77134_DROME 9 kD basic protein OS=Drosophila melanogaster GN=ATPsynE PE=1 SV=1	3221900	302800	273060	307850	238640	1039900	1059600	2.64582	1.40372	0.147727	0.830539	0	ATPsynE
tr|O77425|O77425_DROME	>tr|O77425|O77425_DROME Ribokinase OS=Drosophila melanogaster GN=EG:115C2.1 PE=2 SV=1	3046700	308470	317880	314880	1318000	445480	342000	2.23695	1.16153	0.278217	0.555617	0	CG13369
tr|O77430|O77430_DROME	>tr|O77430|O77430_DROME GEO01111p1 OS=Drosophila melanogaster GN=SkpA PE=1 SV=1	3355100	497920	313580	270920	698320	780730	793640	2.09964	1.07014	0.00635994	2.19655	1	SkpA
tr|O77477|O77477_DROME	>tr|O77477|O77477_DROME CG4882, isoform A OS=Drosophila melanogaster GN=CG4882 PE=1 SV=1	1628500	132860	239100	126420	483000	215820	431360	2.26771	1.18123	0.0784963	1.10515	0	CG4882
tr|O96299|O96299_DROME	>tr|O96299|O96299_DROME LD47736p OS=Drosophila melanogaster GN=Sodh-2 PE=1 SV=1	120790		47660	73131					-10			-1	Sodh-2
tr|O97102|O97102_DROME	>tr|O97102|O97102_DROME Small ubiquitin-related modifier OS=Drosophila melanogaster GN=smt3 PE=1 SV=1	101310000	12600000	10694000	9276500	23390000	21703000	23643000	2.11038	1.0775	0.000451321	3.34551	1	smt3
tr|O97182|O97182_DROME	>tr|O97182|O97182_DROME Actin related complex p41 subunit OS=Drosophila melanogaster GN=Arpc1 PE=1 SV=1	5257700	612030	529900	469660	1015700	1924300	706130	2.26244	1.17788	0.139032	0.856887	0	Arpc1
tr|O97479|O97479_DROME	>tr|O97479|O97479_DROME FI05212p OS=Drosophila melanogaster GN=Sodh-1 PE=1 SV=1	49988000	11136000	4178400	4878300	23151000	3304900	3339500	1.47555	0.561256	0.669905	0.173987	0	Sodh-1
tr|Q0E8E8|Q0E8E8_DROME	>tr|Q0E8E8|Q0E8E8_DROME MIP08013p1 OS=Drosophila melanogaster GN=Mpcp PE=1 SV=1	868610	465840	402770						-10			-1	Mpcp
tr|Q8IRB6|Q8IRB6_DROME	>tr|Q8IRB6|Q8IRB6_DROME FI04413p OS=Drosophila melanogaster GN=Hexo1 PE=1 SV=1;>tr|Q0E8H9|Q0E8H9_DROME Hexosaminidase 1, isoform A OS=Drosophila melanogaster GN=Hexo1 PE=1 SV=1	2691900		116630	224760	431720	1559100	359690	4.59008	2.19852	0.310164	0.508409	0	Hexo1
tr|Q0E8J0|Q0E8J0_DROME	>tr|Q0E8J0|Q0E8J0_DROME MEP-1, isoform A OS=Drosophila melanogaster GN=MEP-1 PE=1 SV=1	13400	4215.3	4334.6	4850.1					-10			-1	MEP-1
tr|Q8SXD5|Q8SXD5_DROME	>tr|Q8SXD5|Q8SXD5_DROME GH02216p OS=Drosophila melanogaster GN=vir-1 PE=1 SV=1;>tr|Q0E8R1|Q0E8R1_DROME FI07211p OS=Drosophila melanogaster GN=vir-1 PE=1 SV=1;>tr|M9PFQ2|M9PFQ2_DROME Virus-induced RNA 1, isoform G OS=Drosophila melanogaster GN=vir-1 PE=1 SV	582340				283460		298880		10			1	vir-1
tr|Q0E8U4|Q0E8U4_DROME	>tr|Q0E8U4|Q0E8U4_DROME FI09636p OS=Drosophila melanogaster GN=CG17224-RB PE=1 SV=1	740390	228850		29280	244350	131980	105930	1.24552	0.316751	0.754263	0.122477	0	CG17224
tr|Q0E8X6|Q0E8X6_DROME	>tr|Q0E8X6|Q0E8X6_DROME eIF2B-delta, isoform B OS=Drosophila melanogaster GN=eIF2Bdelta PE=1 SV=1;>tr|Q9W1Q8|Q9W1Q8_DROME LD05345p OS=Drosophila melanogaster GN=eIF2Bdelta PE=1 SV=1	140410		18000	19877	48031	30462	24036	1.8046	0.851676	0.199296	0.700502	0	eIF2B-delta
tr|Q0E8X7|Q0E8X7_DROME	>tr|Q0E8X7|Q0E8X7_DROME Uncharacterized protein, isoform A OS=Drosophila melanogaster GN=roh PE=1 SV=1	1156700		622640	534060					-10			-1	CG30415
tr|Q7KN97|Q7KN97_DROME	>tr|Q7KN97|Q7KN97_DROME Pyruvate carboxylase OS=Drosophila melanogaster GN=PCB PE=1 SV=1;>tr|Q0E9E2|Q0E9E2_DROME Pyruvate carboxylase OS=Drosophila melanogaster GN=PCB PE=1 SV=1	50981000	5578700	5597300	4961700	15350000	9055000	10439000	2.15917	1.11048	0.031512	1.50152	1	PCB
tr|Q0E9F9|Q0E9F9_DROME	>tr|Q0E9F9|Q0E9F9_DROME CG2915, isoform A OS=Drosophila melanogaster GN=CG2915-RB PE=1 SV=1	1180300	265250	331170	224530		155110	204200	0.656514	-0.607103	0.122768	0.910916	0	CG2915
tr|Q9VZ69|Q9VZ69_DROME	>tr|Q9VZ69|Q9VZ69_DROME IGF-II mRNA-binding protein OS=Drosophila melanogaster GN=Imp PE=1 SV=2;>tr|Q0KHU2|Q0KHU2_DROME IGF-II mRNA-binding protein, isoform K OS=Drosophila melanogaster GN=Imp PE=1 SV=2;>tr|Q8IR99|Q8IR99_DROME IGF-II mRNA-binding protein,	624780	88001	73004	97708	224870	73186	68006	1.41493	0.500735	0.52879	0.276717	0	Imp
tr|Q0KHZ6|Q0KHZ6_DROME	>tr|Q0KHZ6|Q0KHZ6_DROME CG7834, isoform A OS=Drosophila melanogaster GN=CG7834 PE=1 SV=1	17690000	1116900	1013700	1423100	6197300	4116800	3822100	3.97788	1.992	0.0096134	2.01712	1	CG7834
tr|Q0KI00|Q0KI00_DROME	>tr|Q0KI00|Q0KI00_DROME Aminopeptidase OS=Drosophila melanogaster GN=SP1029 PE=1 SV=1	253220	14962	13297	19622	63150	84194	57995	4.28853	2.10048	0.00310653	2.50772	1	SP1029
tr|Q0KI96|Q0KI96_DROME	>tr|Q0KI96|Q0KI96_DROME Pasilla, isoform K OS=Drosophila melanogaster GN=ps PE=1 SV=1;>tr|Q9GNC8|Q9GNC8_DROME PASILLA splice variant 1 OS=Drosophila melanogaster GN=ps PE=1 SV=1;>tr|A0A0B4KFY5|A0A0B4KFY5_DROME Pasilla, isoform Q OS=Drosophila melanogaster	965010			25229	315730	318430	305610	12.4165	3.63419	0.0007333	3.13472	1	ps
tr|Q0KI98|Q0KI98_DROME	>tr|Q0KI98|Q0KI98_DROME FI06027p OS=Drosophila melanogaster GN=TrpRS PE=1 SV=1	969230	348290	201980	100160	84432	54887	179480	0.490136	-1.02875	0.245187	0.610503	0	Aats-trp
tr|Q0KIB3|Q0KIB3_DROME	>tr|Q0KIB3|Q0KIB3_DROME CG2051, isoform A OS=Drosophila melanogaster GN=Hat1 PE=1 SV=1	1895200	420470	545480	347210	166030	218600	197410	0.443236	-1.17385	0.0152089	1.8179	-1	CG2051
tr|Q17Q80|Q17Q80_DROME	>tr|Q17Q80|Q17Q80_DROME Big bang, isoform F OS=Drosophila melanogaster GN=bbg PE=2 SV=1;>tr|Q9VUE7|Q9VUE7_DROME Big bang, isoform I OS=Drosophila melanogaster GN=bbg PE=2 SV=2;>tr|Q17Q84|Q17Q84_DROME Big bang, isoform E OS=Drosophila melanogaster GN=bbg PE	37242			5583.2	18370	7329.2	5959	1.89009	0.918453	0.591737	0.227871	0	bbg
tr|Q1WWB7|Q1WWB7_DROME	>tr|Q1WWB7|Q1WWB7_DROME IP10750p OS=Drosophila melanogaster GN=CG13192 PE=1 SV=1	156470		83855	72618					-10			-1	CG13192
tr|X2J8B3|X2J8B3_DROME	>tr|X2J8B3|X2J8B3_DROME Black, isoform C OS=Drosophila melanogaster GN=b PE=1 SV=1;>tr|Q24062|Q24062_DROME Black, isoform A OS=Drosophila melanogaster GN=b PE=1 SV=1	1349900	36209	203440	217680	310260	284010	298340	1.95179	0.964798	0.0689839	1.16125	0	b
tr|Q24216|Q24216_DROME	>tr|Q24216|Q24216_DROME Cyclin-dependent kinase 7 OS=Drosophila melanogaster GN=Cdk7 PE=1 SV=1	28820			28820					-10			-1	Cdk7
tr|Q24253|Q24253_DROME	>tr|Q24253|Q24253_DROME AP complex subunit beta OS=Drosophila melanogaster GN=AP-1-2beta PE=1 SV=1	1533400	311190	273610	166960	309290	227360	244970	1.03972	0.0561952	0.851511	0.0698097	0	AP-1-2beta
tr|Q2PDQ9|Q2PDQ9_DROME	>tr|Q2PDQ9|Q2PDQ9_DROME CG8927, isoform B OS=Drosophila melanogaster GN=CG8927-RB PE=1 SV=1;>tr|Q9VEY0|Q9VEY0_DROME CG8927, isoform C OS=Drosophila melanogaster GN=CG8927 PE=1 SV=3	291820				55089	96881	139850		10			1	CG8927
tr|Q2QBM1|Q2QBM1_DROME	>tr|Q2QBM1|Q2QBM1_DROME Malic enzyme OS=Drosophila melanogaster GN=Men PE=1 SV=1;>tr|Q9VG32|Q9VG32_DROME Malic enzyme OS=Drosophila melanogaster GN=Men PE=1 SV=1;>tr|Q9VG31|Q9VG31_DROME Malic enzyme OS=Drosophila melanogaster GN=Men PE=1 SV=1	42802000	11420000	8765300	7096900	5663000	3973700	5882700	0.568847	-0.813887	0.0483572	1.31554	0	Men
tr|Q7KY08|Q7KY08_DROME	>tr|Q7KY08|Q7KY08_DROME Argonaute protein OS=Drosophila melanogaster GN=AGO1 PE=1 SV=1;>tr|Q32KD4|Q32KD4_DROME Argonaute-1, isoform A OS=Drosophila melanogaster GN=AGO1 PE=1 SV=1	199940		176900	23041					-10			-1	AGO1
tr|Q3YMU0|Q3YMU0_DROME	>tr|Q3YMU0|Q3YMU0_DROME Protein disulfide-isomerase (Fragment) OS=Drosophila melanogaster GN=ERp60 PE=1 SV=1	19278000	2738800	2729600	1969400	4639300	3046300	4154700	1.59191	0.670758	0.0520147	1.28387	0	ERp60
tr|Q494K2|Q494K2_DROME	>tr|Q494K2|Q494K2_DROME Ctf4 OS=Drosophila melanogaster GN=Ctf4 PE=1 SV=1	41155	31866		9289.1					-10			-1	Ctf4
tr|Q4V3U8|Q4V3U8_DROME	>tr|Q4V3U8|Q4V3U8_DROME CG4927 OS=Drosophila melanogaster GN=CG4927 PE=2 SV=1	628090	171190	157040		176000	59346	64524	0.609065	-0.715332	0.28489	0.545323	0	CG4927
tr|Q500Y7|Q500Y7_DROME	>tr|Q500Y7|Q500Y7_DROME GEO11443p1 OS=Drosophila melanogaster GN=UQCR-6.4 PE=2 SV=1	875830		875830						-10			-1	UQCR-6.4
tr|Q5BI50|Q5BI50_DROME	>tr|Q5BI50|Q5BI50_DROME Cullin 4, isoform A OS=Drosophila melanogaster GN=Cul4 PE=1 SV=1	91551				48579		42972		10			1	Cul4
tr|Q5BIA9|Q5BIA9_DROME	>tr|Q5BIA9|Q5BIA9_DROME CG8613 OS=Drosophila melanogaster GN=CG8613 PE=1 SV=1	307720	56501	57854	30777	162580			3.36066	1.74875	0.022981	1.63863	1	CG8613
tr|Q5LJN5|Q5LJN5_DROME	>tr|Q5LJN5|Q5LJN5_DROME Male fertility factor kl5 OS=Drosophila melanogaster GN=kl-5 PE=4 SV=4	41387	5251.9	9632.7	4793.1		10384	11325	1.65484	0.726694	0.12367	0.907734	0	NA
tr|Q5U0V7|Q5U0V7_DROME	>tr|Q5U0V7|Q5U0V7_DROME GH06496p OS=Drosophila melanogaster GN=Synj PE=1 SV=1	413340	70822	61755	42071	51978	83781	102930	1.36669	0.450682	0.280257	0.552443	0	Synj
tr|Q5U117|Q5U117_DROME	>tr|Q5U117|Q5U117_DROME Enigma OS=Drosophila melanogaster GN=Egm PE=1 SV=1	1251400	65564	166560	71634	303500	304490	339630	3.11965	1.64139	0.00350672	2.4551	1	Egm
tr|Q8T0N3|Q8T0N3_DROME	>tr|Q8T0N3|Q8T0N3_DROME GH18222p OS=Drosophila melanogaster GN=Mal-A5 PE=1 SV=1;>tr|Q5U124|Q5U124_DROME LP11544p OS=Drosophila melanogaster GN=Mal-A5 PE=1 SV=1;>tr|A0A0B4LEU9|A0A0B4LEU9_DROME Maltase A5, isoform C OS=Drosophila melanogaster GN=Mal-A5 PE=1	559850	139890	83655	71729	100120	76447	88005	0.896022	-0.158394	0.667381	0.175626	0	Mal-A5
tr|Q5U179|Q5U179_DROME	>tr|Q5U179|Q5U179_DROME CG9640, isoform A OS=Drosophila melanogaster GN=SmydA-7 PE=2 SV=1	248690	22810	36477	23398	54059	42763	69188	2.00774	1.00557	0.035019	1.4557	1	CG9640
tr|Q6IHY5|Q6IHY5_DROME	>tr|Q6IHY5|Q6IHY5_DROME HDC00331 OS=Drosophila melanogaster GN=CG34172 PE=1 SV=1	883770	883770							-10			-1	CG34172
tr|Q6NL44|Q6NL44_DROME	>tr|Q6NL44|Q6NL44_DROME GH28815p OS=Drosophila melanogaster GN=CG31188 PE=1 SV=1	688060	173850	162720	162400	86399	56555	46138	0.378965	-1.39986	0.00122044	2.91348	-1	CG33722
tr|Q8IML5|Q8IML5_DROME	>tr|Q8IML5|Q8IML5_DROME V-type proton ATPase subunit a OS=Drosophila melanogaster GN=Vha100-1 PE=1 SV=1;>tr|Q8IML3|Q8IML3_DROME V-type proton ATPase subunit a OS=Drosophila melanogaster GN=Vha100-1 PE=1 SV=1;>tr|Q8IML4|Q8IML4_DROME V-type proton ATPase sub	147690	24177	69900	23668		29941		0.76286	-0.390509	0.790082	0.102328	0	Vha100-1
tr|Q6NMY2|Q6NMY2_DROME	>tr|Q6NMY2|Q6NMY2_DROME CG8343 OS=Drosophila melanogaster GN=BEST:GH10831 PE=2 SV=1	3471200	855400	700680	899380	500120	161860	353770	0.41367	-1.27345	0.0139936	1.85407	-1	CG8343
tr|Q76NQ0|Q76NQ0_DROME	>tr|Q76NQ0|Q76NQ0_DROME Dolichyl-diphosphooligosaccharide--protein glycosyltransferase subunit 1 OS=Drosophila melanogaster GN=CG33303 PE=1 SV=1	877320	103730	160230	25249	232330	170070	185710	2.03351	1.02397	0.0832127	1.07981	0	CG33303
tr|Q9VYR1|Q9VYR1_DROME	>tr|Q9VYR1|Q9VYR1_DROME Regucalcin homologue OS=Drosophila melanogaster GN=regucalcin PE=1 SV=1;>tr|Q76NR6|Q76NR6_DROME Regucalcin, isoform D OS=Drosophila melanogaster GN=regucalcin PE=1 SV=1	96175000	18499000	17598000	14049000	21873000	10819000	13337000	0.9179	-0.123592	0.723174	0.140757	0	regucalcin
tr|Q7JQH9|Q7JQH9_DROME	>tr|Q7JQH9|Q7JQH9_DROME LD31742p OS=Drosophila melanogaster GN=whd PE=1 SV=1;>tr|Q9V3K9|Q9V3K9_DROME Carnitine palmitoyltransferase I OS=Drosophila melanogaster GN=whd PE=1 SV=1	1142100	261220	220830	178370	171920	176030	133720	0.729339	-0.455339	0.0957577	1.01883	0	whd
tr|Q7JQN4|Q7JQN4_DROME	>tr|Q7JQN4|Q7JQN4_DROME LD15481p OS=Drosophila melanogaster GN=Rs1 PE=1 SV=1	67434					29838	37596		10			1	Rs1
tr|Q7JR58|Q7JR58_DROME	>tr|Q7JR58|Q7JR58_DROME CG6543, isoform A OS=Drosophila melanogaster GN=CG6543 PE=1 SV=1	12897000	2317700	1990500	1174400	3333100	1949700	2132100	1.35244	0.435567	0.307515	0.512133	0	CG6543
tr|Q7JRC0|Q7JRC0_DROME	>tr|Q7JRC0|Q7JRC0_DROME GEO09647p1 OS=Drosophila melanogaster GN=CG12384 PE=1 SV=1	2606400				998110	883480	724820		10			1	CG12384
tr|Q7JRI4|Q7JRI4_DROME	>tr|Q7JRI4|Q7JRI4_DROME RE20857p OS=Drosophila melanogaster GN=CG12134 PE=1 SV=1;>tr|Q7JZ37|Q7JZ37_DROME RE62785p OS=Drosophila melanogaster GN=CG12134 PE=1 SV=1	1132300	50485	40932		512890	187890	340110	7.59078	2.92425	0.0889147	1.05103	0	CG12134
tr|Q7JRN6|Q7JRN6_DROME	>tr|Q7JRN6|Q7JRN6_DROME CG4716, isoform A OS=Drosophila melanogaster GN=CG4716 PE=2 SV=1	583020	110680	125770	107100		116920	122560	1.04561	0.0643476	0.545151	0.263483	0	CG4716
tr|Q7JUS9|Q7JUS9_DROME	>tr|Q7JUS9|Q7JUS9_DROME CG9090, isoform A OS=Drosophila melanogaster GN=CG9090-RA PE=1 SV=1	6129400	1659600	1503100	994340	1015000	471060	486240	0.474448	-1.07568	0.053638	1.27053	0	CG9090
tr|Q7JV39|Q7JV39_DROME	>tr|Q7JV39|Q7JV39_DROME GH01142p OS=Drosophila melanogaster GN=CG11400 PE=2 SV=1	2027700	231010	245650	209310	801140	275820	264800	1.956	0.967909	0.28508	0.545034	0	CG11400
tr|Q7JV69|Q7JV69_DROME	>tr|Q7JV69|Q7JV69_DROME SD11922p OS=Drosophila melanogaster GN=Spn55B PE=1 SV=1	3902800	834370	665090	492690	958670	469440	482510	0.959074	-0.0602854	0.892485	0.0493993	0	Spn55B
tr|Q7JVG2|Q7JVG2_DROME	>tr|Q7JVG2|Q7JVG2_DROME Aps, isoform A OS=Drosophila melanogaster GN=Aps PE=1 SV=1	353060			87621	84855	78301	102290	1.00983	0.0141073	0.957514	0.0188547	0	Aps
tr|Q7JVH6|Q7JVH6_DROME	>tr|Q7JVH6|Q7JVH6_DROME CG9436 OS=Drosophila melanogaster GN=CG9436 PE=1 SV=1	16038000	2315600	2088600	1603000	4082400	2803200	3145300	1.66981	0.739686	0.0371479	1.43007	0	CG9436
tr|Q7JVK1|Q7JVK1_DROME	>tr|Q7JVK1|Q7JVK1_DROME HL07956p OS=Drosophila melanogaster GN=mRpL18 PE=2 SV=1	142420		142420						-10			-1	mRpL18
tr|Q7JVK8|Q7JVK8_DROME	>tr|Q7JVK8|Q7JVK8_DROME CG5323 OS=Drosophila melanogaster GN=CG5323 PE=1 SV=1	402340				183350	98642	120340		10			1	CG5323
tr|Q7JVN6|Q7JVN6_DROME	>tr|Q7JVN6|Q7JVN6_DROME CG1213, isoform A OS=Drosophila melanogaster GN=CG1213 PE=1 SV=1	67538			67538					-10			-1	CG1213
tr|Q7JW03|Q7JW03_DROME	>tr|Q7JW03|Q7JW03_DROME CG2257 OS=Drosophila melanogaster GN=UbcE2H PE=1 SV=1	381230	290610	90617						-10			-1	UbcE2H
tr|Q7JWD6|Q7JWD6_DROME	>tr|Q7JWD6|Q7JWD6_DROME Elongin C, isoform A OS=Drosophila melanogaster GN=EloC PE=1 SV=1	2546300	165800		180810	313530	916780	969340	4.23079	2.08093	0.131371	0.881499	0	EloC
tr|Q7JWQ7|Q7JWQ7_DROME	>tr|Q7JWQ7|Q7JWQ7_DROME RE01730p OS=Drosophila melanogaster GN=Swim PE=1 SV=1	1320900	210940	154010	129610	405240	205420	215650	1.6708	0.740538	0.18575	0.731072	0	Swim
tr|Q7JWX3|Q7JWX3_DROME	>tr|Q7JWX3|Q7JWX3_DROME GH10112p OS=Drosophila melanogaster GN=nec PE=1 SV=1	9265800	811040	980220	806440	2736500	1929700	2001800	2.56689	1.36002	0.00679688	2.16769	1	nec
tr|Q7JX82|Q7JX82_DROME	>tr|Q7JX82|Q7JX82_DROME GH21964p OS=Drosophila melanogaster GN=kermit PE=1 SV=1	124370				124370				10			1	kermit
tr|Q7JX87|Q7JX87_DROME	>tr|Q7JX87|Q7JX87_DROME Peroxiredoxin 2540-2 OS=Drosophila melanogaster GN=Prx2540-2 PE=1 SV=1;>tr|A1Z892|A1Z892_DROME LD11278p OS=Drosophila melanogaster GN=Prx2540-1 PE=2 SV=1;>tr|A1Z893|A1Z893_DROME DI01187p OS=Drosophila melanogaster GN=CG12896-RA PE=2	62807000	6327000	5454600	5769400	15843000	14601000	14812000	2.57854	1.36656	3.65656e-05	4.43693	1	Prx2540-2
tr|Q7JXA2|Q7JXA2_DROME	>tr|Q7JXA2|Q7JXA2_DROME LOBE OS=Drosophila melanogaster GN=PRAS40 PE=1 SV=1	95492	64033	31459						-10			-1	NA
tr|Q7JXB5|Q7JXB5_DROME	>tr|Q7JXB5|Q7JXB5_DROME RE12569p OS=Drosophila melanogaster GN=CG10924 PE=1 SV=1;>tr|A8DYI3|A8DYI3_DROME Uncharacterized protein, isoform B OS=Drosophila melanogaster GN=CG10924 PE=1 SV=1	819470	76392	77789	101820	299010	155540	108920	2.20105	1.13819	0.150833	0.821503	0	CG10924
tr|Q7JXB9|Q7JXB9_DROME	>tr|Q7JXB9|Q7JXB9_DROME Endonuclease G OS=Drosophila melanogaster GN=EndoG PE=1 SV=1	370390	64313		21621	120140	117710	46601	2.20674	1.14192	0.234736	0.62942	0	EndoG
tr|Q7JXC4|Q7JXC4_DROME	>tr|Q7JXC4|Q7JXC4_DROME CG6459 protein OS=Drosophila melanogaster GN=P32 PE=1 SV=1	37052000	4235500	5253900	4088100	9131600	6710200	7632300	1.7289	0.789852	0.0142719	1.84552	0	P32
tr|Q7JXZ2|Q7JXZ2_DROME	>tr|Q7JXZ2|Q7JXZ2_DROME Eip55E, isoform A OS=Drosophila melanogaster GN=Eip55E PE=1 SV=1	1524400	218420	218460	220910	383280	229100	254280	1.31753	0.397839	0.218646	0.660259	0	Eip55E
tr|Q7JYW9|Q7JYW9_DROME	>tr|Q7JYW9|Q7JYW9_DROME Phosphotransferase OS=Drosophila melanogaster GN=Hex-C PE=1 SV=1	23973000	5098500	4110400	3604800	4662500	3275800	3221100	0.870896	-0.199428	0.440157	0.356392	0	Hex-C
tr|Q7JZB1|Q7JZB1_DROME	>tr|Q7JZB1|Q7JZB1_DROME RE49860p OS=Drosophila melanogaster GN=CG12338 PE=1 SV=1	1056000	31664	72122	806120	114950	31118		0.240796	-2.05411	0.531377	0.274597	0	CG12338
tr|Q9XZ57|Q9XZ57_DROME	>tr|Q9XZ57|Q9XZ57_DROME Eb1, isoform E OS=Drosophila melanogaster GN=Eb1 PE=1 SV=1;>tr|Q7JZD3|Q7JZD3_DROME Eb1, isoform A OS=Drosophila melanogaster GN=Eb1 PE=1 SV=1;>tr|A1Z6P3|A1Z6P3_DROME Eb1, isoform F OS=Drosophila melanogaster GN=Eb1 PE=1 SV=2	542820	36570	106230	135040	103220	77018	84744	0.953722	-0.06836	0.894163	0.0485834	0	Eb1
tr|Q7JZZ3|Q7JZZ3_DROME	>tr|Q7JZZ3|Q7JZZ3_DROME RE03883p OS=Drosophila melanogaster GN=CG13321 PE=1 SV=1	21017000	2418900	2173500	1714100	5415700	4266900	5027800	2.33258	1.22193	0.00209968	2.67785	1	CG13321
tr|Q7K012|Q7K012_DROME	>tr|Q7K012|Q7K012_DROME Brahma associated protein 55kD OS=Drosophila melanogaster GN=Bap55 PE=1 SV=1	3386700	1090000	1332000	908260	26815	14875	14669	0.0169233	-5.88484	0.000885879	3.05263	-1	Bap55
tr|Q7K025|Q7K025_DROME	>tr|Q7K025|Q7K025_DROME GH09761p OS=Drosophila melanogaster GN=CG11892 PE=2 SV=1	514400	125240	187790	68410	59884		73070	0.522837	-0.935566	0.268448	0.571141	0	CG11892
tr|Q7K084|Q7K084_DROME	>tr|Q7K084|Q7K084_DROME Odorant-binding protein 44a, isoform A OS=Drosophila melanogaster GN=Obp44a PE=1 SV=1	10734000	1788700	1398700	784380	2806600	2238400	1717400	1.70261	0.76775	0.0962041	1.01681	0	Obp44a
tr|Q7K0B6|Q7K0B6_DROME	>tr|Q7K0B6|Q7K0B6_DROME Glutathione S transferase T1 OS=Drosophila melanogaster GN=GstT1 PE=1 SV=1	649800	103230	291720	119300	135550			0.790763	-0.338682	0.794305	0.100013	0	GstT1
tr|Q7K0D3|Q7K0D3_DROME	>tr|Q7K0D3|Q7K0D3_DROME CG12909 protein OS=Drosophila melanogaster GN=CG12909 PE=1 SV=1	2250000	110120	1672200	55126	50624	198970	162940	0.224515	-2.15512	0.422402	0.374274	0	CG12909
tr|Q7K0E6|Q7K0E6_DROME	>tr|Q7K0E6|Q7K0E6_DROME Aspartyl-tRNA synthetase, isoform A OS=Drosophila melanogaster GN=AspRS PE=1 SV=1	6577100	1407500	1270700	902980	1303100	795950	897020	0.836615	-0.257364	0.417862	0.378967	0	Aats-asp
tr|Q7K0P0|Q7K0P0_DROME	>tr|Q7K0P0|Q7K0P0_DROME Juvenile hormone-inducible protein 26 OS=Drosophila melanogaster GN=JhI-26 PE=1 SV=1	1121800	430680	292620	286520	89603	22343		0.166286	-2.58826	0.0235861	1.62734	-1	JhI-26
tr|Q7K126|Q7K126_DROME	>tr|Q7K126|Q7K126_DROME LD13864p OS=Drosophila melanogaster GN=Not3 PE=1 SV=1	258840				103270	86026	69546		10			1	Not3
tr|Q7K127|Q7K127_DROME	>tr|Q7K127|Q7K127_DROME CG7997, isoform A OS=Drosophila melanogaster GN=CG7997 PE=1 SV=1	3674300	567570	561740	206370	746030	761220	831410	1.75091	0.808108	0.0522464	1.28194	0	CG7997
tr|Q7K130|Q7K130_DROME	>tr|Q7K130|Q7K130_DROME Dynactin 4, p62 subunit OS=Drosophila melanogaster GN=DCTN4-p62 PE=1 SV=1	316880	29438	21029	20485	114360	95968	35602	3.46615	1.79333	0.0716729	1.14465	0	DCTN4-p62
tr|Q7K148|Q7K148_DROME	>tr|Q7K148|Q7K148_DROME Proteasome subunit beta type OS=Drosophila melanogaster GN=Prosbeta5 PE=1 SV=1	19224000	5009700	4790200	3632300	2732800	1449100	1609600	0.431165	-1.21369	0.0123287	1.90908	-1	Prosbeta5
tr|Q7K1M4|Q7K1M4_DROME	>tr|Q7K1M4|Q7K1M4_DROME CG1902, isoform A OS=Drosophila melanogaster GN=CG1902 PE=1 SV=1	2580600	170470	171190	100630	723380	680650	734260	4.83459	2.27339	3.83885e-05	4.4158	1	CG1902
tr|Q7K1Q7|Q7K1Q7_DROME	>tr|Q7K1Q7|Q7K1Q7_DROME Ribosome assembly factor mrt4 OS=Drosophila melanogaster GN=RpLP0-like PE=1 SV=1	285300					127410	157890		10			1	RpLP0-like
tr|Q7K1S1|Q7K1S1_DROME	>tr|Q7K1S1|Q7K1S1_DROME CG8067, isoform A OS=Drosophila melanogaster GN=CG8067 PE=2 SV=1	84205						84205		10			1	CG8067
tr|Q7K1U0|Q7K1U0_DROME	>tr|Q7K1U0|Q7K1U0_DROME Activity-regulated cytoskeleton associated protein 1 OS=Drosophila melanogaster GN=Arc1 PE=1 SV=1	285110		30046		92546	73659	88857	2.82968	1.50064	0.0414821	1.38214	1	Arc1
tr|Q7K1W5|Q7K1W5_DROME	>tr|Q7K1W5|Q7K1W5_DROME CG8187 OS=Drosophila melanogaster GN=CG8187 PE=1 SV=1	65539		65539						-10			-1	CG8187
tr|Q7K231|Q7K231_DROME	>tr|Q7K231|Q7K231_DROME CG7747 OS=Drosophila melanogaster GN=CG7747 PE=1 SV=1	24964	24964							-10			-1	CG7747
tr|Q7K2W6|Q7K2W6_DROME	>tr|Q7K2W6|Q7K2W6_DROME GH04080p OS=Drosophila melanogaster GN=PPO1 PE=1 SV=1	30094000	3409100	2975700	3007900	8017600	6418600	6264900	2.20396	1.1401	0.00284474	2.54596	1	PPO1
tr|Q7K3B7|Q7K3B7_DROME	>tr|Q7K3B7|Q7K3B7_DROME LD40177p OS=Drosophila melanogaster GN=CG11208 PE=1 SV=1	1218900	156250	155000	126520	87494	321280	372380	1.78439	0.835434	0.264293	0.577914	0	CG11208
tr|Q7K3E2|Q7K3E2_DROME	>tr|Q7K3E2|Q7K3E2_DROME CG5080, isoform A OS=Drosophila melanogaster GN=CG5080 PE=1 SV=1	730370	104890	99635	65599	135320	140300	184620	1.70381	0.768765	0.0335418	1.47441	0	CG5080
tr|Q7K3J0|Q7K3J0_DROME	>tr|Q7K3J0|Q7K3J0_DROME CG8258 OS=Drosophila melanogaster GN=CCT8 PE=1 SV=1	4615000	1151600	1119700	631430	567030	492080	653230	0.589907	-0.761441	0.0855374	1.06784	0	CG8258
tr|Q7K3M5|Q7K3M5_DROME	>tr|Q7K3M5|Q7K3M5_DROME DHX15 ortholog, isoform A OS=Drosophila melanogaster GN=Dhx15 PE=1 SV=1	998580	202980	155270	132520	103950	254480	149380	1.03472	0.0492417	0.913611	0.0392387	0	Dhx15
tr|Q7K3U4|Q7K3U4_DROME	>tr|Q7K3U4|Q7K3U4_DROME Flavin-containing monooxygenase OS=Drosophila melanogaster GN=Fmo-2 PE=2 SV=1	787170		121210	167990	135380	176960	185630	1.14793	0.199029	0.479352	0.319346	0	Fmo-2
tr|Q7K3W2|Q7K3W2_DROME	>tr|Q7K3W2|Q7K3W2_DROME CG8728 OS=Drosophila melanogaster GN=CG8728-RA PE=1 SV=1	1510800	70014	48845	75343	530540	421980	364100	6.77964	2.76121	0.00163584	2.78626	1	CG8728
tr|Q7K3Y9|Q7K3Y9_DROME	>tr|Q7K3Y9|Q7K3Y9_DROME GH02025p OS=Drosophila melanogaster GN=CG17739 PE=2 SV=1	63182					63182			10			1	CG17739
tr|Q7K3Z3|Q7K3Z3_DROME	>tr|Q7K3Z3|Q7K3Z3_DROME GH01724p OS=Drosophila melanogaster GN=p47 PE=1 SV=1	753810	62516	34305	23946	428070	150070	54903	5.24185	2.39008	0.203797	0.690802	0	p47
tr|Q7K485|Q7K485_DROME	>tr|Q7K485|Q7K485_DROME CathD OS=Drosophila melanogaster GN=cathD PE=1 SV=1	5988500	1689700	1528500	635710	776660	564500	793380	0.553863	-0.852398	0.163216	0.787236	0	cathD
tr|Q7K4L8|Q7K4L8_DROME	>tr|Q7K4L8|Q7K4L8_DROME CG7878 OS=Drosophila melanogaster GN=CG7878 PE=1 SV=1	138810	41867			39234	33859	23851	0.771841	-0.373624	0.400367	0.397541	0	CG7878
tr|Q7K4Q9|Q7K4Q9_DROME	>tr|Q7K4Q9|Q7K4Q9_DROME HMG coenzyme A synthase, isoform A OS=Drosophila melanogaster GN=Hmgs PE=1 SV=1	183550	24701	36629			76526	45697	1.99287	0.994851	0.206795	0.684461	0	Hmgs
tr|Q7K4T8|Q7K4T8_DROME	>tr|Q7K4T8|Q7K4T8_DROME CG8520, isoform A OS=Drosophila melanogaster GN=CG8520 PE=1 SV=1	210150	79478	87932	42738					-10			-1	CG8520
tr|Q7K4Y0|Q7K4Y0_DROME	>tr|Q7K4Y0|Q7K4Y0_DROME Desaturase 1, isoform A OS=Drosophila melanogaster GN=Desat1 PE=1 SV=1	714160			83610	128830	205750	295960	2.51381	1.32988	0.320349	0.494377	0	Desat1
tr|Q7K511|Q7K511_DROME	>tr|Q7K511|Q7K511_DROME CG3835, isoform A OS=Drosophila melanogaster GN=D2hgdh PE=1 SV=1	4603100	407190	627080	594060	1078300	987100	909390	1.8269	0.869395	0.00593314	2.22672	0	CG3835
tr|Q7K533|Q7K533_DROME	>tr|Q7K533|Q7K533_DROME GH14572p OS=Drosophila melanogaster GN=Gbp2 PE=1 SV=1	1582100	190600	196060	164750	303120	387150	340450	1.86924	0.902455	0.00363533	2.43946	0	CG11395
tr|Q7K561|Q7K561_DROME	>tr|Q7K561|Q7K561_DROME CG8503 OS=Drosophila melanogaster GN=SmydA-1 PE=2 SV=1	424120				76185	176110	171830		10			1	CG8503
tr|Q7K568|Q7K568_DROME	>tr|Q7K568|Q7K568_DROME GH10642p OS=Drosophila melanogaster GN=hebe PE=1 SV=1	48289						48289		10			1	hebe
tr|Q7K569|Q7K569_DROME	>tr|Q7K569|Q7K569_DROME Glycerol-3-phosphate dehydrogenase OS=Drosophila melanogaster GN=Gpo-1 PE=1 SV=1	5667100	602620	809130	722520	1216600	1147200	1169100	1.65532	0.72711	0.0018085	2.74268	0	Gpo-1
tr|Q7K5K3|Q7K5K3_DROME	>tr|Q7K5K3|Q7K5K3_DROME GH08474p OS=Drosophila melanogaster GN=CG11876 PE=1 SV=1	30991000	4430300	3697000	2959800	9165000	5031500	5707400	1.79523	0.844169	0.0948391	1.02301	0	CG11876
tr|Q7K738|Q7K738_DROME	>tr|Q7K738|Q7K738_DROME EG:52C10.4 protein OS=Drosophila melanogaster GN=Ubc10 PE=1 SV=1	711220				154130	312630	244460		10			1	Ubc10
tr|Q7K7G0|Q7K7G0_DROME	>tr|Q7K7G0|Q7K7G0_DROME Coatomer subunit delta OS=Drosophila melanogaster GN=deltaCOP PE=1 SV=1;>tr|Q9W555|Q9W555_DROME Coatomer subunit delta OS=Drosophila melanogaster GN=deltaCOP PE=1 SV=1	7158400	1187400	979800	904860	2025500	1173500	887370	1.33017	0.411613	0.39132	0.407468	0	deltaCOP
tr|Q7K8X7|Q7K8X7_DROME	>tr|Q7K8X7|Q7K8X7_DROME Glutathione S transferase E9 OS=Drosophila melanogaster GN=GstE9 PE=1 SV=1	2935200	1107500	1055600	772160					-10			-1	GstE9
tr|Q8MPN5|Q8MPN5_DROME	>tr|Q8MPN5|Q8MPN5_DROME Serpin 4 OS=Drosophila melanogaster GN=Spn42Da PE=1 SV=1;>tr|Q8MPN6|Q8MPN6_DROME Serpin 4 OS=Drosophila melanogaster GN=Spn42Da PE=1 SV=1;>tr|Q8MM39|Q8MM39_DROME RE31022p OS=Drosophila melanogaster GN=Spn42Da PE=1 SV=1;>tr|Q7K8Y3|Q7	1482400	492550	431420	191630	24658	291250	50920	0.328817	-1.60464	0.116579	0.933379	0	Spn42Da
tr|Q7K9H6|Q7K9H6_DROME	>tr|Q7K9H6|Q7K9H6_DROME FI05490p OS=Drosophila melanogaster GN=Sara PE=1 SV=1	15676	7828.2		7848.3					-10			-1	Sara
tr|Q7KK51|Q7KK51_DROME	>tr|Q7KK51|Q7KK51_DROME BcDNA.GH04637 OS=Drosophila melanogaster GN=BcDNA.GH04637 PE=1 SV=1;>tr|Q9W1Q6|Q9W1Q6_DROME CG3530, isoform B OS=Drosophila melanogaster GN=CG3530 PE=1 SV=2;>tr|Q8MLR7|Q8MLR7_DROME CG3530, isoform A OS=Drosophila melanogaster GN=BcD	62601					33092	29508		10			1	CG3530
tr|Q7KK96|Q7KK96_DROME	>tr|Q7KK96|Q7KK96_DROME Structural maintenance of chromosomes protein OS=Drosophila melanogaster GN=SMC2 PE=1 SV=1	4079.5		4079.5						-10			-1	SMC2
tr|Q7KLW9|Q7KLW9_DROME	>tr|Q7KLW9|Q7KLW9_DROME BcDNA.LD02793 OS=Drosophila melanogaster GN=Prp19 PE=1 SV=1	171010	49216	38329	83469					-10			-1	Prp19
tr|Q7KLX3|Q7KLX3_DROME	>tr|Q7KLX3|Q7KLX3_DROME GEO05407p1 OS=Drosophila melanogaster GN=Tapdelta PE=1 SV=1	1860400	454910	516130	319830	472500	97011		0.661776	-0.595586	0.426755	0.369822	0	Tapdelta
tr|Q7KM15|Q7KM15_DROME	>tr|Q7KM15|Q7KM15_DROME Transcription factor BTF3 OS=Drosophila melanogaster GN=bic PE=1 SV=1	22329000	1010100	741830	857950	7620000	6268500	5830900	7.55567	2.91756	0.000468052	3.32971	1	bic
tr|Q7KMJ6|Q7KMJ6_DROME	>tr|Q7KMJ6|Q7KMJ6_DROME BcDNA.GH11110 OS=Drosophila melanogaster GN=nito PE=1 SV=1	163320		6777.5	20802	48513	35925	51299	3.28111	1.71418	0.0296456	1.52804	1	nito
tr|Q7KMM4|Q7KMM4_DROME	>tr|Q7KMM4|Q7KMM4_DROME BcDNA.GH04962 OS=Drosophila melanogaster GN=GCS2alpha PE=1 SV=1	2903900	653870	637400	486860	540500	305800	279470	0.63312	-0.659449	0.0919307	1.03654	0	GCS2alpha
tr|Q7KMP8|Q7KMP8_DROME	>tr|Q7KMP8|Q7KMP8_DROME 26S proteasome regulatory complex subunit p39A OS=Drosophila melanogaster GN=Rpn9 PE=1 SV=1	257280	83690	71757	83771		18061		0.226501	-2.14241	0.0163404	1.78674	-1	Rpn9
tr|Q7KMQ0|Q7KMQ0_DROME	>tr|Q7KMQ0|Q7KMQ0_DROME 26S proteasome regulatory complex subunit p48B OS=Drosophila melanogaster GN=Rpt1 PE=1 SV=1	3071900	661260	560180	280950	890240	320040	359230	1.04468	0.0630549	0.922564	0.0350037	0	Rpt1
tr|Q7KN04|Q7KN04_DROME	>tr|Q7KN04|Q7KN04_DROME Fat-spondin OS=Drosophila melanogaster GN=fat-spondin PE=1 SV=1	670110	101830	72580	129530	82437	131150	152590	1.20477	0.268755	0.477135	0.321359	0	fat-spondin
tr|Q7KN75|Q7KN75_DROME	>tr|Q7KN75|Q7KN75_DROME Dodeca-satellite-binding protein 1, isoform A OS=Drosophila melanogaster GN=Dp1 PE=1 SV=1	12978000	1187400	1123100	1022900	4273600	2481300	2889800	2.89335	1.53274	0.0180835	1.74272	1	Dp1
tr|Q7KN85|Q7KN85_DROME	>tr|Q7KN85|Q7KN85_DROME ATP-citrate synthase OS=Drosophila melanogaster GN=ATPCL PE=1 SV=1	25884000	5953000	3525900	3782400	4862000	4056700	3703800	0.95183	-0.0712245	0.812969	0.0899258	0	ATPCL
tr|Q7KN94|Q7KN94_DROME	>tr|Q7KN94|Q7KN94_DROME Putative uncharacterized protein OS=Drosophila melanogaster GN=wal PE=1 SV=1	12250000	1851100	1918700	1391800	3784000	1855800	1448300	1.37324	0.457581	0.43395	0.36256	0	wal
tr|Q7KSD3|Q7KSD3_DROME	>tr|Q7KSD3|Q7KSD3_DROME Frayed, isoform A OS=Drosophila melanogaster GN=fray PE=1 SV=1	2115400	160970	194820	111260	1042900	305300	300110	3.52919	1.81934	0.18744	0.727137	0	fray
tr|Q7KSM5|Q7KSM5_DROME	>tr|Q7KSM5|Q7KSM5_DROME Activator of SUMO 1 OS=Drosophila melanogaster GN=Aos1 PE=1 SV=1	1758100	421340	462820	319200	222940	163600	168180	0.460976	-1.11724	0.00983651	2.00716	-1	Aos1
tr|Q7KSW3|Q7KSW3_DROME	>tr|Q7KSW3|Q7KSW3_DROME Sugarlethal, isoform B OS=Drosophila melanogaster GN=sgll PE=1 SV=1;>tr|Q9VHZ5|Q9VHZ5_DROME LP04163p OS=Drosophila melanogaster GN=sgll PE=1 SV=3	5129700	488090	733060	734850	1337100	884560	952010	1.62253	0.698246	0.0675316	1.17049	0	sgll
tr|Q7KT11|Q7KT11_DROME	>tr|Q7KT11|Q7KT11_DROME CG9331, isoform B OS=Drosophila melanogaster GN=CG9331 PE=1 SV=1;>tr|Q9VIJ0|Q9VIJ0_DROME CG9331, isoform A OS=Drosophila melanogaster GN=CG9331 PE=1 SV=3;>tr|Q8SZU0|Q8SZU0_DROME CG9331, isoform C OS=Drosophila melanogaster GN=CG9331	10853000	2451800	1825300	1417200	1980200	1188300	1990200	0.905941	-0.142511	0.679462	0.167835	0	CG9331
tr|Q7KTA1|Q7KTA1_DROME	>tr|Q7KTA1|Q7KTA1_DROME HL01444p OS=Drosophila melanogaster GN=NimB2 PE=2 SV=1	1359000			207610	237820	456520	457010	1.84858	0.886416	0.350827	0.454907	0	NimB2
tr|Q7KTF6|Q7KTF6_DROME	>tr|Q7KTF6|Q7KTF6_DROME Mucin 30E OS=Drosophila melanogaster GN=Muc30E PE=4 SV=3	382430	43833		21150	129560	106570	81313	3.25668	1.7034	0.0345341	1.46175	1	Muc30E
tr|Q7KTG2|Q7KTG2_DROME	>tr|Q7KTG2|Q7KTG2_DROME Apolipoprotein lipid transfer particle OS=Drosophila melanogaster GN=Apoltp PE=1 SV=2	2236400	271610	218840	216740	596680	433260	499260	2.16236	1.11261	0.00569402	2.24458	1	Apoltp
tr|Q7KTW5|Q7KTW5_DROME	>tr|Q7KTW5|Q7KTW5_DROME CG9391, isoform A OS=Drosophila melanogaster GN=142335_at PE=1 SV=1	28779000	4626200	2913200	2173700	6752500	5913700	6399400	1.96287	0.972968	0.0152214	1.81755	0	CG9391
tr|Q7KTW9|Q7KTW9_DROME	>tr|Q7KTW9|Q7KTW9_DROME Asparagine synthetase OS=Drosophila melanogaster GN=AsnS PE=2 SV=1	585270	53019	42733	95007	136320	136380	121810	2.06811	1.04831	0.0152832	1.81579	1	AsnS
tr|Q7KUA4|Q7KUA4_DROME	>tr|Q7KUA4|Q7KUA4_DROME LD22577p OS=Drosophila melanogaster GN=Uba2 PE=1 SV=1	2595300	518210	373750	348940	495000	524050	335310	1.09143	0.126224	0.656796	0.18257	0	Uba2
tr|Q7KUC2|Q7KUC2_DROME	>tr|Q7KUC2|Q7KUC2_DROME FI04467p OS=Drosophila melanogaster GN=Pdxk PE=1 SV=1	2208500	294170	214550	207800	615640	349440	526860	2.0822	1.05811	0.0357567	1.44664	1	Pdxk
tr|Q7KUQ6|Q7KUQ6_DROME	>tr|Q7KUQ6|Q7KUQ6_DROME Limpet, isoform K OS=Drosophila melanogaster GN=Lmpt PE=1 SV=2	2006200	292670	323440	274430	1059500	24694	31403	1.25272	0.325064	0.838097	0.0767057	0	Lmpt
tr|Q961A8|Q961A8_DROME	>tr|Q961A8|Q961A8_DROME LD25351p OS=Drosophila melanogaster GN=Papss PE=1 SV=1;>tr|Q7KUT8|Q7KUT8_DROME PAPS synthetase, isoform E OS=Drosophila melanogaster GN=Papss PE=1 SV=1;>tr|Q8IQV1|Q8IQV1_DROME PAPS synthetase, isoform D OS=Drosophila melanogaster GN	2410900	87461	78235	325960	752810	608270	558170	3.90364	1.96482	0.00888128	2.05152	1	Papss
tr|X2JE34|X2JE34_DROME	>tr|X2JE34|X2JE34_DROME RNA-binding protein 2, isoform E OS=Drosophila melanogaster GN=eIF4H1 PE=1 SV=1;>tr|Q8IR13|Q8IR13_DROME RNA-binding protein 2, isoform B OS=Drosophila melanogaster GN=eIF4H1 PE=1 SV=1;>tr|Q9VXF8|Q9VXF8_DROME RNA-binding protein 2, i	1746200	281250	321360	298060	305810	226700	313030	0.93879	-0.0911256	0.573256	0.241651	0	Rbp2
tr|Q7KV27|Q7KV27_DROME	>tr|Q7KV27|Q7KV27_DROME CG1640, isoform A OS=Drosophila melanogaster GN=CG1640 PE=1 SV=1;>tr|Q9VYD9|Q9VYD9_DROME AT04676p OS=Drosophila melanogaster GN=CG1640 PE=1 SV=3	10920000	1861000	2468000	2206000	2022100	1095800	1267500	0.671064	-0.575479	0.0987966	1.00526	0	CG1640
tr|Q7KVL7|Q7KVL7_DROME	>tr|Q7KVL7|Q7KVL7_DROME Vacuolar protein sorting-associated protein 35 OS=Drosophila melanogaster GN=Vps35 PE=1 SV=2;>tr|Q9W277|Q9W277_DROME Vacuolar protein sorting-associated protein 35 OS=Drosophila melanogaster GN=Vps35 PE=1 SV=4	201300	84706	96378	20220					-10			-1	Vps35
tr|Q9W4H6|Q9W4H6_DROME	>tr|Q9W4H6|Q9W4H6_DROME Pyruvate dehydrogenase E1 component subunit alpha OS=Drosophila melanogaster GN=l(1)G0334 PE=1 SV=2;>tr|Q7KVX1|Q7KVX1_DROME Pyruvate dehydrogenase E1 component subunit alpha OS=Drosophila melanogaster GN=l(1)G0334 PE=1 SV=1;>tr|Q7YU	62579000	10077000	7903800	6999500	15843000	10835000	10921000	1.50515	0.589903	0.0901052	1.04525	0	l(1)G0334
tr|Q7KY04|Q7KY04_DROME	>tr|Q7KY04|Q7KY04_DROME Rab4 protein OS=Drosophila melanogaster GN=Rab4 PE=1 SV=1	203530			63624			139900	2.19886	1.13675			0	Rab4
tr|Q7PLB8|Q7PLB8_DROME	>tr|Q7PLB8|Q7PLB8_DROME Fatty acid synthase 3 OS=Drosophila melanogaster GN=FASN3 PE=1 SV=3	2110200	347370	275240	238570	425560	427750	395750	1.45041	0.536456	0.0183055	1.73742	0	FASN3
tr|Q7PLL3|Q7PLL3_DROME	>tr|Q7PLL3|Q7PLL3_DROME Eukaryotic initiation factor 4B OS=Drosophila melanogaster GN=eIF4B PE=1 SV=1;>tr|Q7PLL1|Q7PLL1_DROME Eukaryotic initiation factor 4B, isoform E OS=Drosophila melanogaster GN=eIF4B PE=1 SV=2;>tr|Q8SYL3|Q8SYL3_DROME Eukaryotic initia	12798000	781020	871530	590200	4174900	3113900	3266100	4.70623	2.23457	0.00125412	2.90166	1	eIF-4B
tr|Q7PLL6|Q7PLL6_DROME	>tr|Q7PLL6|Q7PLL6_DROME Uncharacterized protein, isoform A OS=Drosophila melanogaster GN=Dmel\CG17514 PE=1 SV=2	71321	17467	27082	20120		6651.8		0.308578	-1.6963	0.121595	0.915086	0	CG17514
tr|Q86B44|Q86B44_DROME	>tr|Q86B44|Q86B44_DROME Glutathione synthetase OS=Drosophila melanogaster GN=GSS PE=1 SV=2;>tr|Q8IQZ1|Q8IQZ1_DROME Glutathione synthetase OS=Drosophila melanogaster GN=GSS PE=1 SV=2	9571700	929340	1014900	616990	3301500	2002200	1706800	2.73716	1.45268	0.0424057	1.37258	1	GSS
tr|Q86B46|Q86B46_DROME	>tr|Q86B46|Q86B46_DROME CG5613, isoform B OS=Drosophila melanogaster GN=CG5613 PE=4 SV=1;>tr|Q9VX51|Q9VX51_DROME CG5613, isoform A OS=Drosophila melanogaster GN=CG5613 PE=4 SV=1	500400	73747	115390	34173	156490	61434	59175	1.24087	0.311354	0.67514	0.170606	0	CG5613
tr|Q86BI3|Q86BI3_DROME	>tr|Q86BI3|Q86BI3_DROME Zinc-finger protein at 72D, isoform B OS=Drosophila melanogaster GN=Zn72D PE=1 SV=1;>tr|F0JAG2|F0JAG2_DROME MIP27703p OS=Drosophila melanogaster GN=Zn72D PE=1 SV=1;>tr|Q9VUY6|Q9VUY6_DROME GH12756p OS=Drosophila melanogaster GN=Zn72D	599550	119370	55334	56067	188100	47123	133550	1.598	0.676271	0.375804	0.425039	0	Zn72D
tr|Q86BM5|Q86BM5_DROME	>tr|Q86BM5|Q86BM5_DROME A kinase anchor protein 200, isoform D OS=Drosophila melanogaster GN=Akap200 PE=1 SV=1;>tr|Q8IPF5|Q8IPF5_DROME A kinase anchor protein 200, isoform B OS=Drosophila melanogaster GN=Akap200 PE=1 SV=1;>tr|Q9VLL3|Q9VLL3_DROME A kinase a	2155600	284500	244710	182510	621810	384480	437620	2.02876	1.0206	0.034936	1.45673	1	Akap200
tr|Q960K8|Q960K8_DROME	>tr|Q960K8|Q960K8_DROME 3-hydroxyisobutyryl-CoA hydrolase, mitochondrial OS=Drosophila melanogaster GN=CG5044 PE=1 SV=1;>tr|Q86BP1|Q86BP1_DROME 3-hydroxyisobutyryl-CoA hydrolase, mitochondrial OS=Drosophila melanogaster GN=CG5044-RB PE=1 SV=1	3962700	767950	678250	652490	747640	498640	617730	0.888178	-0.171079	0.383338	0.416418	0	CG5044
tr|Q86BQ4|Q86BQ4_DROME	>tr|Q86BQ4|Q86BQ4_DROME CG2862, isoform B OS=Drosophila melanogaster GN=CG2862 PE=1 SV=1;>tr|Q8STA5|Q8STA5_DROME CG2862, isoform A OS=Drosophila melanogaster GN=CG2862 PE=1 SV=1	2873200	831350	801890	324700	915250			1.40237	0.487864	0.507785	0.29432	0	CG2862
tr|Q9VDL2|Q9VDL2_DROME	>tr|Q9VDL2|Q9VDL2_DROME LD40493p OS=Drosophila melanogaster GN=TFAM PE=1 SV=1;>tr|Q86BR8|Q86BR8_DROME Mitochondrial transcription factor A, isoform B OS=Drosophila melanogaster GN=TFAM PE=1 SV=1	4771700	348640	319080	231150	2024000	1123600	725130	4.30844	2.10717	0.0620104	1.20754	0	TFAM
tr|Q86BS3|Q86BS3_DROME	>tr|Q86BS3|Q86BS3_DROME Chromator, isoform A OS=Drosophila melanogaster GN=Chro PE=1 SV=1	42021			15901		26120		1.64266	0.716037			0	Chro
tr|Q86BS7|Q86BS7_DROME	>tr|Q86BS7|Q86BS7_DROME CG9485, isoform C OS=Drosophila melanogaster GN=CG9485 PE=1 SV=1;>tr|Q7KVP4|Q7KVP4_DROME CG9485, isoform A OS=Drosophila melanogaster GN=CG9485 PE=1 SV=1;>tr|E1JGQ5|E1JGQ5_DROME CG9485, isoform D OS=Drosophila melanogaster GN=CG9485	18349000	4072900	2968900	4165200	2872000	1899600	2370600	0.637298	-0.64996	0.0465424	1.33215	0	CG9485
tr|Q8I0J1|Q8I0J1_DROME	>tr|Q8I0J1|Q8I0J1_DROME CG1910, isoform D OS=Drosophila melanogaster GN=CG1910 PE=1 SV=1;>tr|Q8IMG1|Q8IMG1_DROME CG1910, isoform C OS=Drosophila melanogaster GN=CG1910 PE=1 SV=1;>tr|Q9V9U3|Q9V9U3_DROME CG1910, isoform A OS=Drosophila melanogaster GN=CG1910	2637000	287580	239420	223860	421960	875340	588870	2.51201	1.32884	0.0473926	1.32429	1	CG1910
tr|Q8I725|Q8I725_DROME	>tr|Q8I725|Q8I725_DROME CG1236 OS=Drosophila melanogaster GN=CG1236 PE=1 SV=2	7824100	1020100	427940	686140	2381900	1661800	1646200	2.66608	1.41472	0.0162746	1.78849	1	CG1236
tr|Q9VAK1|Q9VAK1_DROME	>tr|Q9VAK1|Q9VAK1_DROME Alphabet, isoform A OS=Drosophila melanogaster GN=alph PE=1 SV=1;>tr|Q8IMK7|Q8IMK7_DROME Alphabet, isoform B OS=Drosophila melanogaster GN=alph PE=1 SV=1;>tr|Q961C5|Q961C5_DROME Alphabet, isoform E OS=Drosophila melanogaster GN=alph	2560300	357090	357300	333320	566190	333390	613010	1.44371	0.529782	0.148884	0.827152	0	alph
tr|Q8IMQ8|Q8IMQ8_DROME	>tr|Q8IMQ8|Q8IMQ8_DROME CG6330, isoform B OS=Drosophila melanogaster GN=CG6330-RB PE=1 SV=1;>tr|Q9VBA0|Q9VBA0_DROME CG6330, isoform A OS=Drosophila melanogaster GN=CG6330 PE=1 SV=2	2599800	475420	294590	281460	733600	531590	283170	1.47257	0.558333	0.315641	0.500807	0	CG6330
tr|Q8IMT4|Q8IMT4_DROME	>tr|Q8IMT4|Q8IMT4_DROME Uncharacterized protein OS=Drosophila melanogaster GN=CG31288 PE=1 SV=1	3068100	706640	674290	266950	883160	383670	153370	0.861835	-0.214517	0.78303	0.106222	0	CG31288
tr|Q8IMV6|Q8IMV6_DROME	>tr|Q8IMV6|Q8IMV6_DROME Scaffold attachment factor B, isoform B OS=Drosophila melanogaster GN=Saf-B PE=1 SV=2	562440	67529	60520	20194	250420	58223	105560	2.79408	1.48237	0.211514	0.674661	0	Saf-B
tr|Q8IN02|Q8IN02_DROME	>tr|Q8IN02|Q8IN02_DROME BcDNA.LD12153 OS=Drosophila melanogaster GN=Dph5 PE=1 SV=2	273580	91920	94089	87571					-10			-1	Dph5
tr|Q9VD13|Q9VD13_DROME	>tr|Q9VD13|Q9VD13_DROME GH02671p OS=Drosophila melanogaster GN=lqfR PE=1 SV=4;>tr|Q8IN05|Q8IN05_DROME Liquid facets-Related, isoform D OS=Drosophila melanogaster GN=lqfR PE=1 SV=2	75270					42038	33232		10			1	lqfR
tr|Q8IN25|Q8IN25_DROME	>tr|Q8IN25|Q8IN25_DROME Aminopeptidase OS=Drosophila melanogaster GN=CG31198 PE=1 SV=1	44041	21731	22311						-10			-1	CG31198
tr|Q8INE8|Q8INE8_DROME	>tr|Q8INE8|Q8INE8_DROME Arginine methyltransferase 3, isoform B OS=Drosophila melanogaster GN=Art3 PE=1 SV=1;>tr|Q9VFB3|Q9VFB3_DROME Arginine methyltransferase 3, isoform A OS=Drosophila melanogaster GN=Art3 PE=1 SV=1	962630	188880	99655	137090	170360	173010	193640	1.2617	0.335366	0.239549	0.620606	0	Art3
tr|Q8ING0|Q8ING0_DROME	>tr|Q8ING0|Q8ING0_DROME Uncharacterized protein OS=Drosophila melanogaster GN=CG31326 PE=3 SV=1	1839400	353890	157130	365460	394430	279840	288610	1.09858	0.135635	0.727286	0.138294	0	CG31326
tr|Q8INH5|Q8INH5_DROME	>tr|Q8INH5|Q8INH5_DROME Aminopeptidase OS=Drosophila melanogaster GN=CG32473-RB PE=1 SV=1;>tr|Q8INH6|Q8INH6_DROME Aminopeptidase OS=Drosophila melanogaster GN=CG32473-RC PE=1 SV=1	4537800	1128800	1121100	702420	746330	419950	419260	0.537049	-0.896875	0.0627209	1.20259	0	CG32473
tr|Q9VGM2|Q9VGM2_DROME	>tr|Q9VGM2|Q9VGM2_DROME Fatty acid bindin protein, isoform B OS=Drosophila melanogaster GN=fabp PE=1 SV=1;>tr|Q8INK3|Q8INK3_DROME Fatty acid bindin protein, isoform C OS=Drosophila melanogaster GN=fabp PE=1 SV=1;>tr|Q8INK2|Q8INK2_DROME Fatty acid bindin pr	519140000	110710000	93038000	76440000	81196000	73055000	84695000	0.852806	-0.229711	0.259746	0.58545	0	fabp
tr|Q8INL3|Q8INL3_DROME	>tr|Q8INL3|Q8INL3_DROME Peptide deformylase OS=Drosophila melanogaster GN=CG31373 PE=3 SV=1	25124000	2944500	2507600	3606000	5781600	5732600	4551400	1.77362	0.826694	0.0104256	1.9819	0	CG31373
tr|Q9VHI8|Q9VHI8_DROME	>tr|Q9VHI8|Q9VHI8_DROME Uncharacterized protein, isoform A OS=Drosophila melanogaster GN=CG11980 PE=1 SV=2;>tr|Q8INP8|Q8INP8_DROME Uncharacterized protein, isoform B OS=Drosophila melanogaster GN=CG11980 PE=1 SV=1;>tr|Q8INP9|Q8INP9_DROME RE51612p OS=Drosop	6640500	820100	780340	912840	1949100	1121600	1056600	1.6422	0.715627	0.13711	0.86293	0	CG11980
tr|Q8IP67|Q8IP67_DROME	>tr|Q8IP67|Q8IP67_DROME CG9008, isoform E OS=Drosophila melanogaster GN=CG9008 PE=1 SV=3;>tr|Q9V3D1|Q9V3D1_DROME CG9008, isoform A OS=Drosophila melanogaster GN=BG:DS00797.2 PE=1 SV=1;>tr|X2JAD3|X2JAD3_DROME CG9008, isoform D OS=Drosophila melanogaster GN=	706960		162820	116570	173230	110490	143840	1.02022	0.028884	0.92869	0.0321293	0	CG9008
tr|Q8IP91|Q8IP91_DROME	>tr|Q8IP91|Q8IP91_DROME Uncharacterized protein, isoform C OS=Drosophila melanogaster GN=CG31759 PE=1 SV=2	63932	38678	25254						-10			-1	CG31759
tr|Q8IP94|Q8IP94_DROME	>tr|Q8IP94|Q8IP94_DROME Threonyl-tRNA synthetase, isoform B OS=Drosophila melanogaster GN=ThrRS PE=1 SV=1;>tr|Q9VKB0|Q9VKB0_DROME FI05224p OS=Drosophila melanogaster GN=ThrRS PE=1 SV=2	23230000	6023800	4779800	3641300	3561100	2630700	2593400	0.608187	-0.717413	0.0674035	1.17132	0	Aats-thr
tr|Q8IPA2|Q8IPA2_DROME	>tr|Q8IPA2|Q8IPA2_DROME FI17312p1 OS=Drosophila melanogaster GN=Mal-B2 PE=1 SV=1	17142000	2289200	2361200	1689100	3815800	3596500	3390300	1.70401	0.768938	0.00376788	2.4239	0	Mal-B2
tr|Q8IPB1|Q8IPB1_DROME	>tr|Q8IPB1|Q8IPB1_DROME Deoxyuridine triphosphatase, isoform B OS=Drosophila melanogaster GN=dUTPase PE=1 SV=1;>tr|Q9V3I1|Q9V3I1_DROME BcDNA.LD08534 OS=Drosophila melanogaster GN=dUTPase PE=1 SV=1	5991700	679800	805060	1030800	1357100	1056800	1062200	1.38178	0.466533	0.0884247	1.05343	0	dUTPase
tr|Q9VKV1|Q9VKV1_DROME	>tr|Q9VKV1|Q9VKV1_DROME Alpha-mannosidase OS=Drosophila melanogaster GN=LManII PE=1 SV=2;>tr|Q8IPB7|Q8IPB7_DROME Alpha-mannosidase OS=Drosophila melanogaster GN=LManII PE=1 SV=1	20669000	2859500	2878600	2915900	4241400	4007400	3766000	1.38835	0.473374	0.00126043	2.89948	0	LManII
tr|Q8IPE8|Q8IPE8_DROME	>tr|Q8IPE8|Q8IPE8_DROME Mitochondrial trifunctional protein alpha subunit, isoform B OS=Drosophila melanogaster GN=Mtpalpha PE=1 SV=1;>tr|Q9V397|Q9V397_DROME BcDNA.GH12558 OS=Drosophila melanogaster GN=Mtpalpha PE=1 SV=1	7592300	1542100	1484000	925150	1582400	950790	1107800	0.921478	-0.117978	0.724416	0.140012	0	Mtpalpha
tr|Q8IPP8|Q8IPP8_DROME	>tr|Q8IPP8|Q8IPP8_DROME Uncharacterized protein OS=Drosophila melanogaster GN=CG31548 PE=1 SV=1	4078000	938330	659480	545320	696120	808970	429800	0.902834	-0.147468	0.690456	0.160864	0	CG31548
tr|Q9VNC0|Q9VNC0_DROME	>tr|Q9VNC0|Q9VNC0_DROME GH11824p OS=Drosophila melanogaster GN=POLDIP2 PE=1 SV=1;>tr|Q8IPQ6|Q8IPQ6_DROME Polymerase (DNA-directed), delta interacting protein 2, isoform B OS=Drosophila melanogaster GN=POLDIP2 PE=1 SV=1	736890	74824	176400	72174	256600	57932	98957	1.27858	0.354538	0.688358	0.162186	0	POLDIP2
tr|Q8IPT9|Q8IPT9_DROME	>tr|Q8IPT9|Q8IPT9_DROME SD05439p1 OS=Drosophila melanogaster GN=Dmel\CG10512 PE=1 SV=1;>tr|Q8IPU0|Q8IPU0_DROME Uncharacterized protein, isoform B OS=Drosophila melanogaster GN=Dmel\CG10512 PE=1 SV=1;>tr|Q9VP68|Q9VP68_DROME Uncharacterized protein, isoform	1349700	595320	460240		294100			0.55724	-0.84363	0.295478	0.529475	0	CG10512
tr|Q8IPU3|Q8IPU3_DROME	>tr|Q8IPU3|Q8IPU3_DROME Tenzing norgay, isoform C OS=Drosophila melanogaster GN=tzn PE=1 SV=1;>tr|Q9VPB3|Q9VPB3_DROME LD26447p OS=Drosophila melanogaster GN=tzn PE=1 SV=2	176220					97531	78685		10			1	CG4365
tr|Q9VPJ9|Q9VPJ9_DROME	>tr|Q9VPJ9|Q9VPJ9_DROME CG3164, isoform B OS=Drosophila melanogaster GN=CG3164 PE=1 SV=2;>tr|Q8IPV3|Q8IPV3_DROME CG3164, isoform A OS=Drosophila melanogaster GN=CG3164 PE=1 SV=1	40928				40928				10			1	CG3164
tr|Q8IPW2|Q8IPW2_DROME	>tr|Q8IPW2|Q8IPW2_DROME Dreadlocks, isoform A OS=Drosophila melanogaster GN=dock PE=1 SV=1;>tr|Q9VPU1|Q9VPU1_DROME Dreadlocks, isoform B OS=Drosophila melanogaster GN=dock PE=1 SV=1	74927				74927				10			1	dock
tr|Q8IPX7|Q8IPX7_DROME	>tr|Q8IPX7|Q8IPX7_DROME RE44908p OS=Drosophila melanogaster GN=Rrp40 PE=1 SV=1	1005600	42547	48271	55894	433920	196310	228610	5.85392	2.5494	0.0333447	1.47697	1	Rrp40
tr|Q9VQ61|Q9VQ61_DROME	>tr|Q9VQ61|Q9VQ61_DROME Aspartate aminotransferase OS=Drosophila melanogaster GN=Got2 PE=1 SV=1;>tr|Q8IPY3|Q8IPY3_DROME Aspartate aminotransferase OS=Drosophila melanogaster GN=Got2 PE=1 SV=1	7862400	1584400	1444400	1288800	1639700	876690	1028400	0.821009	-0.284529	0.358178	0.445901	0	Got2
tr|Q8IQ82|Q8IQ82_DROME	>tr|Q8IQ82|Q8IQ82_DROME Pastrel, isoform E OS=Drosophila melanogaster GN=pst PE=4 SV=2;>tr|Q8IQ80|Q8IQ80_DROME GH06117p OS=Drosophila melanogaster GN=pst PE=2 SV=2	244410				79755	92348	72307		10			1	pst
tr|Q8IQB8|Q8IQB8_DROME	>tr|Q8IQB8|Q8IQB8_DROME Tequila, isoform D OS=Drosophila melanogaster GN=teq PE=1 SV=1;>tr|Q9VSU2|Q9VSU2_DROME Tequila, isoform G OS=Drosophila melanogaster GN=teq PE=1 SV=4;>tr|E1JI93|E1JI93_DROME Tequila, isoform F OS=Drosophila melanogaster GN=teq PE=1	942490	66337	61559	29661	332650	214810	237470	4.98188	2.31669	0.00526234	2.27882	1	Tequila
tr|Q9VTV3|Q9VTV3_DROME	>tr|Q9VTV3|Q9VTV3_DROME AT17975p OS=Drosophila melanogaster GN=Adk1 PE=1 SV=1;>tr|Q8IQG9|Q8IQG9_DROME Adenylate kinase 1, isoform B OS=Drosophila melanogaster GN=Adk1 PE=1 SV=1	1520200		119520		627880	448010	324790	3.9064	1.96584	0.187136	0.727842	0	Adk1
tr|Q8IQS4|Q8IQS4_DROME	>tr|Q8IQS4|Q8IQS4_DROME MIP05773p OS=Drosophila melanogaster GN=Dmel\CG32191 PE=2 SV=2	45731	24252	21479						-10			-1	CG32191
tr|Q9VYT2|Q9VYT2_DROME	>tr|Q9VYT2|Q9VYT2_DROME CG1847, isoform A OS=Drosophila melanogaster GN=CG1847 PE=1 SV=1;>tr|Q8IR85|Q8IR85_DROME CG1847, isoform C OS=Drosophila melanogaster GN=CG1847 PE=1 SV=2	109940		43115			36664	30163	0.774986	-0.367759	0.334752	0.475277	0	CG1847
tr|Q9VZQ8|Q9VZQ8_DROME	>tr|Q9VZQ8|Q9VZQ8_DROME Glutathione peroxidase OS=Drosophila melanogaster GN=PHGPx PE=1 SV=1;>tr|Q8IRD4|Q8IRD4_DROME Glutathione peroxidase OS=Drosophila melanogaster GN=PHGPx PE=1 SV=1;>tr|Q8IRD3|Q8IRD3_DROME Glutathione peroxidase OS=Drosophila melanogas	29142000	3925100	3898900	2940800	9722700	4003600	4650400	1.70711	0.771556	0.239356	0.620956	0	PHGPx
tr|Q9W0E4|Q9W0E4_DROME	>tr|Q9W0E4|Q9W0E4_DROME Aminopeptidase OS=Drosophila melanogaster GN=Psa PE=1 SV=1;>tr|Q8IRH0|Q8IRH0_DROME Aminopeptidase OS=Drosophila melanogaster GN=Psa PE=1 SV=1;>tr|Q8IRH1|Q8IRH1_DROME Aminopeptidase OS=Drosophila melanogaster GN=Psa PE=1 SV=1	14317000	3002800	2748700	2372500	2411000	1733300	2049000	0.762346	-0.391482	0.0742855	1.1291	0	Psa
tr|Q9W0T7|Q9W0T7_DROME	>tr|Q9W0T7|Q9W0T7_DROME LD37985p OS=Drosophila melanogaster GN=Dis3l2 PE=1 SV=2;>tr|Q8IRJ7|Q8IRJ7_DROME FI04463p OS=Drosophila melanogaster GN=Dis3l2 PE=1 SV=1	817110	19335			41833	317270	438670	13.7535	3.78173	0.403798	0.393835	0	CG16940
tr|Q8IRQ5|Q8IRQ5_DROME	>tr|Q8IRQ5|Q8IRQ5_DROME LP02262p OS=Drosophila melanogaster GN=l(1)G0255 PE=1 SV=1;>tr|Q9W3X6|Q9W3X6_DROME FI05334p OS=Drosophila melanogaster GN=l(1)G0255 PE=1 SV=3	23209000	3166500	3274300	2361400	5589000	4413100	4404900	1.63675	0.710834	0.0185828	1.73089	0	l(1)G0255
tr|Q8MKK1|Q8MKK1_DROME	>tr|Q8MKK1|Q8MKK1_DROME RH09246p OS=Drosophila melanogaster GN=AIMP3 PE=1 SV=1	258480	87164	85022	86290					-10			-1	CG30185
tr|Q8MLS1|Q8MLS1_DROME	>tr|Q8MLS1|Q8MLS1_DROME 5-formyltetrahydrofolate cyclo-ligase OS=Drosophila melanogaster GN=CG34424 PE=3 SV=1	7371700	1176000	976560	1068800	1374300	1339200	1436900	1.2884	0.36558	0.00855718	2.06767	0	CG34424
tr|Q8MLS2|Q8MLS2_DROME	>tr|Q8MLS2|Q8MLS2_DROME Ribose-5-phosphate isomerase, isoform B OS=Drosophila melanogaster GN=Rpi PE=1 SV=3	5738800	986250	1172700	1293600	810410	754000	721860	0.662198	-0.594667	0.0139489	1.85546	0	Rpi
tr|Q8MLU9|Q8MLU9_DROME	>tr|Q8MLU9|Q8MLU9_DROME Uncharacterized protein OS=Drosophila melanogaster GN=CG13492 PE=4 SV=3	889710	211150	190090	157900	171870	70768	87938	0.591222	-0.758228	0.0941719	1.02608	0	CG13492
tr|Q8MRI4|Q8MRI4_DROME	>tr|Q8MRI4|Q8MRI4_DROME CG1578, isoform A OS=Drosophila melanogaster GN=CG1578 PE=1 SV=1	300200	119160	27315	59555			94172	1.37124	0.455478	0.682302	0.166023	0	CG1578
tr|Q8MRM6|Q8MRM6_DROME	>tr|Q8MRM6|Q8MRM6_DROME GH15213p OS=Drosophila melanogaster GN=CG12065 PE=1 SV=1;>tr|Q9W3D6|Q9W3D6_DROME Uncharacterized protein, isoform A OS=Drosophila melanogaster GN=CG12065 PE=1 SV=1	818550	92391	100790	134370	249360	118920	122720	1.499	0.584003	0.290216	0.537278	0	CG12065
tr|Q8MRN5|Q8MRN5_DROME	>tr|Q8MRN5|Q8MRN5_DROME Aminopeptidase OS=Drosophila melanogaster GN=CG5839 PE=1 SV=1	333930	108970	113030	64758	38967		8197.9	0.246714	-2.01909	0.0521333	1.28288	0	CG31233
tr|Q8MRT7|Q8MRT7_DROME	>tr|Q8MRT7|Q8MRT7_DROME CG4210 OS=Drosophila melanogaster GN=CG4210 PE=1 SV=1	5672600	1259800	1231200	1917600	669210	309940	284860	0.286715	-1.80231	0.0149717	1.82473	-1	CG4210
tr|Q8MS69|Q8MS69_DROME	>tr|Q8MS69|Q8MS69_DROME CG9596, isoform B OS=Drosophila melanogaster GN=CG9596 PE=2 SV=1	310460	207320			103140			0.497492	-1.00726			0	CG9596
tr|Q8MSI2|Q8MSI2_DROME	>tr|Q8MSI2|Q8MSI2_DROME GH15296p OS=Drosophila melanogaster GN=Scp1 PE=1 SV=1	271240000	33864000	33251000	44593000	66739000	45370000	47422000	1.42811	0.514104	0.108481	0.964646	0	Scp1
tr|Q9VAX7|Q9VAX7_DROME	>tr|Q9VAX7|Q9VAX7_DROME Tubulin beta chain OS=Drosophila melanogaster GN=betaTub97EF PE=1 SV=3;>tr|Q8MST5|Q8MST5_DROME Tubulin beta chain OS=Drosophila melanogaster GN=betaTub97EF PE=1 SV=1	9600700	865580	1113800	988070	1943200	2379000	2311100	2.23535	1.1605	0.00133805	2.87353	1	betaTub97EF
tr|Q8MSW0|Q8MSW0_DROME	>tr|Q8MSW0|Q8MSW0_DROME Isoleucyl-tRNA synthetase, isoform A OS=Drosophila melanogaster GN=IleRS PE=1 SV=1	5964800	1489300	1224000	841770	1322700	592040	495060	0.677849	-0.560965	0.30115	0.521217	0	Aats-ile
tr|Q8MT58|Q8MT58_DROME	>tr|Q8MT58|Q8MT58_DROME RE11562p OS=Drosophila melanogaster GN=CG17337 PE=1 SV=1;>tr|A0A0B4LEQ0|A0A0B4LEQ0_DROME Uncharacterized protein, isoform C OS=Drosophila melanogaster GN=CG17337 PE=1 SV=1	25470000	2745000	2286500	2019800	9928400	4446300	4044300	2.61214	1.38523	0.118231	0.927268	0	CG17337
tr|Q8MZI3|Q8MZI3_DROME	>tr|Q8MZI3|Q8MZI3_DROME GH10652p OS=Drosophila melanogaster GN=BcDNA:HL01868 PE=1 SV=1;>tr|Q7KU78|Q7KU78_DROME Uncharacterized protein, isoform C OS=Drosophila melanogaster GN=BcDNA:HL01868 PE=1 SV=1	71273	16942	32059	22272					-10			-1	CG10077
tr|Q8STG9|Q8STG9_DROME	>tr|Q8STG9|Q8STG9_DROME DSec61alpha OS=Drosophila melanogaster GN=Sec61alpha PE=1 SV=1	84157	84157							-10			-1	Sec61alpha
tr|Q8SWX4|Q8SWX4_DROME	>tr|Q8SWX4|Q8SWX4_DROME Aminopeptidase OS=Drosophila melanogaster GN=CG5839 PE=1 SV=1	1221100	368710	361700	287160	133190		70393	0.300102	-1.73648	0.0102602	1.98884	-1	CG31343
tr|Q8SX54|Q8SX54_DROME	>tr|Q8SX54|Q8SX54_DROME CG3505 OS=Drosophila melanogaster GN=CG3505 PE=1 SV=1	63008						63008		10			1	CG3505
tr|Q8SXC2|Q8SXC2_DROME	>tr|Q8SXC2|Q8SXC2_DROME CG6950, isoform A OS=Drosophila melanogaster GN=CG6950-RC PE=1 SV=1	458690				187550	135810	135330		10			1	CG6950
tr|Q8SXF0|Q8SXF0_DROME	>tr|Q8SXF0|Q8SXF0_DROME Mitochondrial ribosomal protein S9 OS=Drosophila melanogaster GN=mRpS9 PE=1 SV=1	812400	109470	53450	89793	283400	132460	143830	2.21473	1.14713	0.116456	0.933837	0	mRpS9
tr|Q8SXM8|Q8SXM8_DROME	>tr|Q8SXM8|Q8SXM8_DROME Lysine--tRNA ligase OS=Drosophila melanogaster GN=LysRS PE=1 SV=1;>tr|Q9W327|Q9W327_DROME Lysine--tRNA ligase OS=Drosophila melanogaster GN=LysRS PE=1 SV=2	5182100	927020	764580	807610	978710	899240	804950	1.0735	0.102321	0.430375	0.366153	0	Aats-lys
tr|Q8SXQ1|Q8SXQ1_DROME	>tr|Q8SXQ1|Q8SXQ1_DROME CG9629 OS=Drosophila melanogaster GN=Dmel\CG9629 PE=1 SV=1	5438700	607530	546540	641030	1553600	949380	1140600	2.02974	1.02129	0.0269044	1.57018	1	CG9629
tr|Q8SXQ5|Q8SXQ5_DROME	>tr|Q8SXQ5|Q8SXQ5_DROME RH03087p OS=Drosophila melanogaster GN=CG14407 PE=1 SV=1	1088600				355200	289640	443790		10			1	CG14407
tr|Q8SXU3|Q8SXU3_DROME	>tr|Q8SXU3|Q8SXU3_DROME CG8207 OS=Drosophila melanogaster GN=CG8207 PE=1 SV=1	622890	232720			130240	144430	115510	0.558869	-0.839418	0.0254503	1.59431	0	CG8207
tr|Q8SXX1|Q8SXX1_DROME	>tr|Q8SXX1|Q8SXX1_DROME Phosphatidylinositol 5-phosphate 4-kinase, isoform A OS=Drosophila melanogaster GN=PIP4K PE=1 SV=1	1570800	226270	182900	511500	207120	211780	231220	0.706138	-0.501978	0.432058	0.364458	0	PIP4K
tr|Q8SY58|Q8SY58_DROME	>tr|Q8SY58|Q8SY58_DROME CG4872 OS=Drosophila melanogaster GN=CG4872 PE=1 SV=1	387330	95262	126100	64042			101920	1.07132	0.0993941	0.867274	0.0618438	0	CG4872
tr|Q8SYJ2|Q8SYJ2_DROME	>tr|Q8SYJ2|Q8SYJ2_DROME GEO09626p1 OS=Drosophila melanogaster GN=ND-MLRQ PE=1 SV=1	3146900	528910		1332900	890220	225430	169360	0.460129	-1.11989	0.320478	0.494202	0	ND-MLRQ
tr|Q8SYL1|Q8SYL1_DROME	>tr|Q8SYL1|Q8SYL1_DROME Lethal (2) 09851, isoform A OS=Drosophila melanogaster GN=l(2)09851 PE=1 SV=1	617880				180310	146680	290890		10			1	l(2)09851
tr|Q8SYP9|Q8SYP9_DROME	>tr|Q8SYP9|Q8SYP9_DROME Mitochondrial ribosomal protein S5, isoform A OS=Drosophila melanogaster GN=mRpS5 PE=1 SV=1	342110	62454	135500	124590			19567	0.181994	-2.45804	0.192939	0.714579	0	mRpS5
tr|Q8SYQ8|Q8SYQ8_DROME	>tr|Q8SYQ8|Q8SYQ8_DROME CG3420, isoform A OS=Drosophila melanogaster GN=CG3420 PE=2 SV=1	369310	71855	51489			117730	128240	1.99418	0.995795	0.0331995	1.47887	0	CG3420
tr|Q8SZA8|Q8SZA8_DROME	>tr|Q8SZA8|Q8SZA8_DROME Ferredoxin 2 OS=Drosophila melanogaster GN=Fdx2 PE=1 SV=1	10704000	858880	295220	529900	4843800	2079900	2096200	5.35624	2.42122	0.0587486	1.231	0	Fdx2
tr|Q8SZN1|Q8SZN1_DROME	>tr|Q8SZN1|Q8SZN1_DROME GEO08217p1 OS=Drosophila melanogaster GN=CG31313 PE=1 SV=1;>tr|A0A0B4KHI6|A0A0B4KHI6_DROME Uncharacterized protein, isoform C OS=Drosophila melanogaster GN=CG31313 PE=1 SV=1	37861000	2873600	3344300	2668300	9633500	7751700	11590000	3.2607	1.70518	0.00401092	2.39676	1	CG31313
tr|Q8SZW5|Q8SZW5_DROME	>tr|Q8SZW5|Q8SZW5_DROME Alpha-Esterase-3, isoform A OS=Drosophila melanogaster GN=alpha-Est3 PE=2 SV=1	197480		13209		58373	59302	66592	4.65004	2.21724	0.0114222	1.94225	1	alpha-Est3
tr|Q8T0L3|Q8T0L3_DROME	>tr|Q8T0L3|Q8T0L3_DROME GH24511p OS=Drosophila melanogaster GN=Uba1 PE=1 SV=1;>tr|A0A0B4KF46|A0A0B4KF46_DROME Ubiquitin activating enzyme 1, isoform C OS=Drosophila melanogaster GN=Uba1 PE=1 SV=1	9833100	1292600	1450000	1293000	2476900	1474700	1845800	1.43656	0.522623	0.119341	0.92321	0	Uba1
tr|Q8T0Q2|Q8T0Q2_DROME	>tr|Q8T0Q2|Q8T0Q2_DROME CG9775, isoform D OS=Drosophila melanogaster GN=CG9775 PE=2 SV=1;>tr|Q9VN39|Q9VN39_DROME CG9775, isoform A OS=Drosophila melanogaster GN=CG9775 PE=1 SV=1	72742					40806	31936		10			1	CG9775
tr|Q8T4A8|Q8T4A8_DROME	>tr|Q8T4A8|Q8T4A8_DROME AT07769p OS=Drosophila melanogaster GN=SP71 PE=2 SV=1	313960			115150	198810			1.72653	0.787876			0	CG7542
tr|Q8T6I0|Q8T6I0_DROME	>tr|Q8T6I0|Q8T6I0_DROME EH domain containing protein OS=Drosophila melanogaster GN=Past1 PE=1 SV=1;>tr|Q8T8W3|Q8T8W3_DROME AT21416p OS=Drosophila melanogaster GN=Past1 PE=1 SV=1	14132000	1596600	1488600	1169700	3440600	3355900	3081200	2.32149	1.21505	0.000366531	3.43589	1	Past1
tr|Q8T9D0|Q8T9D0_DROME	>tr|Q8T9D0|Q8T9D0_DROME SD06787p OS=Drosophila melanogaster GN=CG14642 PE=2 SV=1;>tr|Q9VMZ3|Q9VMZ3_DROME Uncharacterized protein, isoform B OS=Drosophila melanogaster GN=CG14642 PE=3 SV=1	191900				103750	40048	48107		10			1	CG14642
tr|Q94533|Q94533_DROME	>tr|Q94533|Q94533_DROME Ribosomal protein S6 kinase OS=Drosophila melanogaster GN=S6k PE=1 SV=2	957460	70324	83574	56350	313850	207400	225950	3.5539	1.8294	0.00607973	2.21612	1	S6k
tr|Q94883|Q94883_DROME	>tr|Q94883|Q94883_DROME DNA replication-related element factor, isoform A OS=Drosophila melanogaster GN=Dref PE=1 SV=2	317120		213200			51645	52277	0.24372	-2.03671	0.00216101	2.66534	-1	Dref
tr|Q95R34|Q95R34_DROME	>tr|Q95R34|Q95R34_DROME CG3191, isoform A OS=Drosophila melanogaster GN=CG18842 PE=2 SV=1	194740	59408	46738	43827		22168	22601	0.447771	-1.15917	0.0208696	1.68049	-1	CG3191
tr|Q95R98|Q95R98_DROME	>tr|Q95R98|Q95R98_DROME Protein phosphatase methylesterase 1 OS=Drosophila melanogaster GN=Dmel\CG5068 PE=1 SV=1	1145200	209880	185830	175700	328890	125930	118950	1.00413	0.00594625	0.991522	0.00369774	0	CG5068
tr|Q95RB2|Q95RB2_DROME	>tr|Q95RB2|Q95RB2_DROME Cuticular protein 49Ae OS=Drosophila melanogaster GN=Cpr49Ae PE=1 SV=1	10864000	796840	951060	1166300		7949800		8.18386	3.03278	0.000941498	3.02618	1	Cpr49Ae
tr|Q95RC5|Q95RC5_DROME	>tr|Q95RC5|Q95RC5_DROME CG5745 OS=Drosophila melanogaster GN=CG5745 PE=2 SV=1	104800	55106	30973	18721					-10			-1	CG5745
tr|Q95RS6|Q95RS6_DROME	>tr|Q95RS6|Q95RS6_DROME IP12536p OS=Drosophila melanogaster GN=BcDNA:LD13269 PE=2 SV=1	11479000	821820	877300	827600	4424500	1685500	2842200	3.54301	1.82498	0.0542437	1.26565	0	CG40160
tr|Q95SH2|Q95SH2_DROME	>tr|Q95SH2|Q95SH2_DROME Charged multivesicular body protein 1, isoform A OS=Drosophila melanogaster GN=Chmp1 PE=1 SV=1	1786300	164600	226840		782490	376170	236220	2.37564	1.24832	0.295065	0.530082	0	Chmp1
tr|Q95SI7|Q95SI7_DROME	>tr|Q95SI7|Q95SI7_DROME CG6028 OS=Drosophila melanogaster GN=CG6028 PE=1 SV=1	357840	286880		70966					-10			-1	CG6028
tr|Q95SN8|Q95SN8_DROME	>tr|Q95SN8|Q95SN8_DROME GH12395p OS=Drosophila melanogaster GN=CG17837 PE=1 SV=1	369690	53366				221700	94622	2.9637	1.5674	0.515576	0.287707	0	CG31200
tr|Q95SR0|Q95SR0_DROME	>tr|Q95SR0|Q95SR0_DROME Aminopeptidase OS=Drosophila melanogaster GN=CG11955 PE=2 SV=1	225710	24012		56073		74743	70882	1.81838	0.862654	0.179539	0.745841	0	CG31445
tr|Q95T98|Q95T98_DROME	>tr|Q95T98|Q95T98_DROME Elongation of very long chain fatty acids protein OS=Drosophila melanogaster GN=CG9798 PE=2 SV=1	454130				143890	139250	170990		10			1	CG31523
tr|Q95TK5|Q95TK5_DROME	>tr|Q95TK5|Q95TK5_DROME CG1635 OS=Drosophila melanogaster GN=CG1635 PE=1 SV=1	1227300	31591	33917	151460	536270	221270	252780	4.65654	2.21926	0.0700287	1.15472	0	CG1635
tr|Q95U34|Q95U34_DROME	>tr|Q95U34|Q95U34_DROME GH11113p OS=Drosophila melanogaster GN=Galk PE=1 SV=1	10470000	1839500	2133300	1912300	1434700	1546000	1604300	0.779086	-0.360145	0.012903	1.88931	0	Galk
tr|Q95WY3|Q95WY3_DROME	>tr|Q95WY3|Q95WY3_DROME FI04781p OS=Drosophila melanogaster GN=Nop56 PE=1 SV=1	585340	213360	40675	85401	50941	96678	98280	0.724434	-0.465074	0.594758	0.225659	0	Nop56
tr|Q960D3|Q960D3_DROME	>tr|Q960D3|Q960D3_DROME SD06613p OS=Drosophila melanogaster GN=vig2 PE=1 SV=1;>tr|Q9VBX3|Q9VBX3_DROME Vig2, isoform B OS=Drosophila melanogaster GN=vig2 PE=1 SV=2;>tr|A0A0S0X2W5|A0A0S0X2W5_DROME Flagrante delicto Y, isoform C (Fragment) OS=Drosophila melan	37433000	1844200	1392900	1363800	16390000	9043400	7398400	7.13595	2.83511	0.027301	1.56382	1	vig2
tr|Q960D4|Q960D4_DROME	>tr|Q960D4|Q960D4_DROME CG4199, isoform B OS=Drosophila melanogaster GN=EG:22E5.5 PE=1 SV=1;>tr|O77266|O77266_DROME CG4199, isoform A OS=Drosophila melanogaster GN=CG4199 PE=1 SV=3	3959800	628510	493430	292250	1240200	585500	719940	1.80007	0.848052	0.164951	0.782644	0	CG4199
tr|Q960J9|Q960J9_DROME	>tr|Q960J9|Q960J9_DROME LD47544p OS=Drosophila melanogaster GN=CG1733 PE=1 SV=1	1532500	146980	183570	145790		592180	464020	3.32599	1.73378	0.00524234	2.28048	1	CG32633
tr|Q960M4|Q960M4_DROME	>tr|Q960M4|Q960M4_DROME LD45324p OS=Drosophila melanogaster GN=Prx5 PE=1 SV=1	61276000	4143500	4895200	4843800	17365000	15555000	14473000	3.41387	1.77141	0.000219666	3.65824	1	Prx5
tr|Q961E7|Q961E7_DROME	>tr|Q961E7|Q961E7_DROME GH28523p OS=Drosophila melanogaster GN=PhKgamma PE=2 SV=1;>tr|X2JEJ4|X2JEJ4_DROME Phosphorylase kinase gamma, isoform F OS=Drosophila melanogaster GN=PhKgamma PE=3 SV=1;>tr|Q9I7D0|Q9I7D0_DROME GH22314p OS=Drosophila melanogaster GN=	236780				107230		129550		10			1	PhKgamma
tr|Q961J8|Q961J8_DROME	>tr|Q961J8|Q961J8_DROME CG8560, isoform A OS=Drosophila melanogaster GN=CT14378 PE=1 SV=1;>tr|Q9VS66|Q9VS66_DROME CG8562 OS=Drosophila melanogaster GN=CT15463 PE=2 SV=1	595030	276110	175820	143100					-10			-1	CG8560
tr|Q961Q8|Q961Q8_DROME	>tr|Q961Q8|Q961Q8_DROME GH10454p OS=Drosophila melanogaster GN=CG10562 PE=1 SV=1	576490	65782	72411	86963	212400	15695	123240	1.56041	0.641922	0.503004	0.298429	0	CG10562
tr|Q961R8|Q961R8_DROME	>tr|Q961R8|Q961R8_DROME GH09263p OS=Drosophila melanogaster GN=GlyRS PE=1 SV=1;>tr|Q9VUK8|Q9VUK8_DROME FI18749p1 OS=Drosophila melanogaster GN=GlyRS PE=1 SV=1	9621000	1398200	1309300	898560	2834000	1428700	1752300	1.66803	0.738141	0.150229	0.823245	0	Aats-gly
tr|Q9VRZ1|Q9VRZ1_DROME	>tr|Q9VRZ1|Q9VRZ1_DROME Amidophosphoribosyltransferase OS=Drosophila melanogaster GN=Prat2 PE=3 SV=2;>tr|Q967S0|Q967S0_DROME Amidophosphoribosyltransferase OS=Drosophila melanogaster GN=Prat2 PE=2 SV=1	16171000	3531400	2613200	2836900	2527300	1884900	2777100	0.800456	-0.321105	0.194238	0.711666	0	Prat2
tr|Q9I7J0|Q9I7J0_DROME	>tr|Q9I7J0|Q9I7J0_DROME CG5023 OS=Drosophila melanogaster GN=CG5023 PE=1 SV=1	2963000	349830			1227400	683790	702000	2.48996	1.31612	0.281216	0.55096	0	CG5023
tr|Q9I7K3|Q9I7K3_DROME	>tr|Q9I7K3|Q9I7K3_DROME Aminoacylase OS=Drosophila melanogaster GN=CG6465 PE=1 SV=1	1609900	198380	413460	174600	295810	273000	254600	1.04701	0.0662743	0.880445	0.0552977	0	CG6465
tr|Q9Y168|Q9Y168_DROME	>tr|Q9Y168|Q9Y168_DROME BcDNA.GH02384 OS=Drosophila melanogaster GN=BcDNA.GH02384 PE=2 SV=1;>tr|Q9I7L9|Q9I7L9_DROME Uncharacterized protein, isoform A OS=Drosophila melanogaster GN=CG18858 PE=4 SV=2	109600	28672	25985		16358	13031	25550	0.670106	-0.577538	0.16524	0.781884	0	CG31683
tr|Q9I7P8|Q9I7P8_DROME	>tr|Q9I7P8|Q9I7P8_DROME Tenzing norgay, isoform B OS=Drosophila melanogaster GN=tzn PE=1 SV=1	26692000	1922600	2095700	2198500	7921500	6192800	6360900	3.29353	1.71963	0.00102963	2.98732	1	CG4365
tr|Q9I7Q5|Q9I7Q5_DROME	>tr|Q9I7Q5|Q9I7Q5_DROME Cuticular protein 65Au, isoform A OS=Drosophila melanogaster GN=Cpr65Au PE=1 SV=2	3192200	87748	132530		1173200	912100	886550	8.99424	3.169	0.00515746	2.28756	1	Cpr65Au
tr|Q9NCC3|Q9NCC3_DROME	>tr|Q9NCC3|Q9NCC3_DROME Sorting nexin OS=Drosophila melanogaster GN=SH3PX1 PE=1 SV=1	566320	33926	51653	25915	139860	139860	175100	4.07932	2.02833	0.00121727	2.91461	1	SH3PX1
tr|Q9NFV7|Q9NFV7_DROME	>tr|Q9NFV7|Q9NFV7_DROME GH01829p OS=Drosophila melanogaster GN=Tep2 PE=1 SV=1;>tr|Q8IPH5|Q8IPH5_DROME Thioester-containing protein 2, isoform F OS=Drosophila melanogaster GN=Tep2 PE=1 SV=2;>tr|Q8IPH4|Q8IPH4_DROME Thioester-containing protein 2, isoform D O	40374000	4329500	3797200	3502400	10143000	9595100	9006600	2.47179	1.30556	0.000151315	3.82012	1	Tep2
tr|Q9U1K7|Q9U1K7_DROME	>tr|Q9U1K7|Q9U1K7_DROME CG3939, isoform A OS=Drosophila melanogaster GN=EG:140G11.5 PE=1 SV=1	1315000	306000	226600		220830	265310	296240	0.979322	-0.0301454	0.901456	0.0450553	0	CG3939
tr|Q9U1L2|Q9U1L2_DROME	>tr|Q9U1L2|Q9U1L2_DROME CG3699 OS=Drosophila melanogaster GN=EG:BACR7A4.14 PE=1 SV=1	8194400	1744000	1091100	1607600	1100800	1275200	1375700	0.844464	-0.243892	0.343253	0.464385	0	CG3699
tr|Q9U9Q1|Q9U9Q1_DROME	>tr|Q9U9Q1|Q9U9Q1_DROME Replication factor C 38kD subunit, isoform A OS=Drosophila melanogaster GN=RfC38 PE=1 SV=1	128990	28100	77497	23390					-10			-1	RfC38
tr|Q9V393|Q9V393_DROME	>tr|Q9V393|Q9V393_DROME Kurtz arrestin OS=Drosophila melanogaster GN=krz PE=1 SV=1	1291100			146830	461850	355890	326540	2.59774	1.37726	0.103951	0.983171	0	krz
tr|Q9V396|Q9V396_DROME	>tr|Q9V396|Q9V396_DROME Carbonic anhydrase 1 OS=Drosophila melanogaster GN=CAH1 PE=1 SV=1	6251000	87532	600520	808250	1651200	1232300	1871200	3.17763	1.66795	0.0188343	1.72505	1	CAH1
tr|Q9V3A8|Q9V3A8_DROME	>tr|Q9V3A8|Q9V3A8_DROME Ergic53, isoform A OS=Drosophila melanogaster GN=ergic53 PE=1 SV=1	762710			136840	250090	281370	94409	1.52458	0.608408	0.598059	0.223256	0	ergic53
tr|Q9V3D0|Q9V3D0_DROME	>tr|Q9V3D0|Q9V3D0_DROME LD33485p OS=Drosophila melanogaster GN=mRpL4 PE=1 SV=1	216580	68856	79648	68076					-10			-1	mRpL4
tr|Q9V3F8|Q9V3F8_DROME	>tr|Q9V3F8|Q9V3F8_DROME Pyrroline-5-carboxylate reductase OS=Drosophila melanogaster GN=P5cr PE=1 SV=1	1651500				663330	473690	514450		10			1	P5cr
tr|Q9V3I2|Q9V3I2_DROME	>tr|Q9V3I2|Q9V3I2_DROME Drab5 OS=Drosophila melanogaster GN=Rab5 PE=1 SV=1	1713000	315910	963490	433600					-10			-1	Rab5
tr|Q9V3N7|Q9V3N7_DROME	>tr|Q9V3N7|Q9V3N7_DROME BcDNA.HL02693 OS=Drosophila melanogaster GN=CRMP PE=1 SV=1;>tr|Q8IPQ2|Q8IPQ2_DROME Collapsin response mediator protein OS=Drosophila melanogaster GN=CRMP PE=1 SV=2	3168100	415390	365950	343880	988380	477660	576790	1.81549	0.860362	0.124583	0.90454	0	CRMP
tr|Q9V3Q4|Q9V3Q4_DROME	>tr|Q9V3Q4|Q9V3Q4_DROME GH25379p OS=Drosophila melanogaster GN=Jafrac2 PE=1 SV=1	416860	102910	182840	131110					-10			-1	Jafrac2
tr|Q9V3T8|Q9V3T8_DROME	>tr|Q9V3T8|Q9V3T8_DROME LD32469p OS=Drosophila melanogaster GN=SC35 PE=1 SV=1	4882200	832350	682140	750620	1521000	527170	568950	1.15541	0.208399	0.738188	0.131833	0	SC35
tr|Q9V3U6|Q9V3U6_DROME	>tr|Q9V3U6|Q9V3U6_DROME 26-29kD-proteinase OS=Drosophila melanogaster GN=26-29-p PE=1 SV=1	19791000	3408600	3988500	3201100	4130500	2466700	2595600	0.867393	-0.205243	0.467443	0.330272	0	26-29-p
tr|Q9V3V6|Q9V3V6_DROME	>tr|Q9V3V6|Q9V3V6_DROME 26S proteasome regulatory complex subunit p50 OS=Drosophila melanogaster GN=Rpt5 PE=1 SV=1	9784000	1693100	1166000	1005400	1751500	2280600	1887400	1.53176	0.615194	0.0587446	1.23103	0	Rpt5
tr|Q9V3V9|Q9V3V9_DROME	>tr|Q9V3V9|Q9V3V9_DROME Endonuclease G inhibitor, isoform A OS=Drosophila melanogaster GN=EndoGI PE=1 SV=1	2477400	333210	284610	138740	617020	567180	536630	2.27455	1.18558	0.00695514	2.15769	1	EndoGI
tr|Q9V3W2|Q9V3W2_DROME	>tr|Q9V3W2|Q9V3W2_DROME GM23292p OS=Drosophila melanogaster GN=ND-B17 PE=1 SV=1	8862700	611110	783980	682410	2512600	2291400	1981300	3.26609	1.70756	0.000636282	3.19635	1	ND-B17
tr|Q9V3W7|Q9V3W7_DROME	>tr|Q9V3W7|Q9V3W7_DROME LD40489p OS=Drosophila melanogaster GN=SF2 PE=1 SV=1	1056600	136910	32567	197280	435020	117690	137160	1.881	0.9115	0.395998	0.402306	0	SF2
tr|Q9V3W9|Q9V3W9_DROME	>tr|Q9V3W9|Q9V3W9_DROME DNA repair protein Rad23 OS=Drosophila melanogaster GN=Rad23 PE=1 SV=1;>tr|Q8IMB7|Q8IMB7_DROME Rad23, isoform B OS=Drosophila melanogaster GN=Rad23 PE=1 SV=1	7001900	1160900	914900	854320	1376100	1606300	1089300	1.3896	0.474672	0.0973231	1.01178	0	Rad23
tr|Q9V3Y7|Q9V3Y7_DROME	>tr|Q9V3Y7|Q9V3Y7_DROME Uncharacterized protein, isoform A OS=Drosophila melanogaster GN=CG15293 PE=1 SV=1	3482700	344650	396880	258080	1051900	843840	587340	2.48405	1.31269	0.0243584	1.61335	1	CG15293
tr|Q9V3Z4|Q9V3Z4_DROME	>tr|Q9V3Z4|Q9V3Z4_DROME GH11341p OS=Drosophila melanogaster GN=Rpn5 PE=1 SV=1	9275800	2663200	2247300	1842700	1024900	829440	668370	0.373558	-1.4206	0.00547417	2.26168	-1	Rpn5
tr|Q9V400|Q9V400_DROME	>tr|Q9V400|Q9V400_DROME Integrin linked kinase, isoform A OS=Drosophila melanogaster GN=Ilk PE=1 SV=1	375560	39734	32187	23581		84948	195110	4.39872	2.13709	0.0798605	1.09767	0	Ilk
tr|Q9V405|Q9V405_DROME	>tr|Q9V405|Q9V405_DROME 26S proteasome regulatory complex subunit p48A OS=Drosophila melanogaster GN=Rpt3 PE=1 SV=1	5329000	1101400	616140	568410	1389100	781190	872820	1.33122	0.412753	0.377566	0.423007	0	Rpt3
tr|Q9V426|Q9V426_DROME	>tr|Q9V426|Q9V426_DROME LD07162p OS=Drosophila melanogaster GN=vig PE=1 SV=1	7706900	806530	659110	606390	2146900	1807400	1680700	2.71956	1.44337	0.00143054	2.8445	1	vig
tr|Q9V434|Q9V434_DROME	>tr|Q9V434|Q9V434_DROME Asparaginyl-tRNA synthetase, isoform A OS=Drosophila melanogaster GN=AsnRS PE=1 SV=1	14085000	1962300	2186000	1961800	4213300	2145100	1616200	1.30515	0.384216	0.478509	0.32011	0	Aats-asn
tr|Q9V436|Q9V436_DROME	>tr|Q9V436|Q9V436_DROME 26S proteasome regulatory complex subunit p30 OS=Drosophila melanogaster GN=Rpn12 PE=1 SV=1	576340	177790	31713	84930	124320	43781	113800	0.957437	-0.0627508	0.936935	0.0282904	0	Rpn12
tr|Q9V445|Q9V445_DROME	>tr|Q9V445|Q9V445_DROME Metalloendopeptidase OS=Drosophila melanogaster GN=CG15255 PE=1 SV=1	1148900		49664	107180	321980	322690	347390	4.21676	2.07613	0.00183787	2.73568	1	CG15255
tr|Q9V455|Q9V455_DROME	>tr|Q9V455|Q9V455_DROME Importin subunit alpha OS=Drosophila melanogaster GN=Kap-alpha3 PE=1 SV=1	606770	98950	40647	88431	128360	139010	111370	1.66094	0.731997	0.0629744	1.20084	0	Kap-alpha3
tr|Q9V470|Q9V470_DROME	>tr|Q9V470|Q9V470_DROME Succinate--CoA ligase [GDP-forming] subunit beta, mitochondrial OS=Drosophila melanogaster GN=Sucb PE=1 SV=1	1405000	76263	228980	271580	395520	107110	325510	1.43569	0.521746	0.470291	0.327633	0	Sucb
tr|Q9V4E0|Q9V4E0_DROME	>tr|Q9V4E0|Q9V4E0_DROME LD47962p OS=Drosophila melanogaster GN=ND-49 PE=1 SV=2	139140	21928	96714	20499					-10			-1	ND-49
tr|Q9V4E7|Q9V4E7_DROME	>tr|Q9V4E7|Q9V4E7_DROME Transporter OS=Drosophila melanogaster GN=Gat PE=1 SV=4;>tr|Q8IMC1|Q8IMC1_DROME Transporter OS=Drosophila melanogaster GN=Gat PE=1 SV=2	2198500	799740	820120	578590					-10			-1	Gat
tr|Q9V9M7|Q9V9M7_DROME	>tr|Q9V9M7|Q9V9M7_DROME RE62581p OS=Drosophila melanogaster GN=RpL21 PE=1 SV=1	41463000	3663900	3872700	2923800	10125000	9946000	10932000	2.96384	1.56747	8.13973e-05	4.08939	1	RpL21
tr|Q9V9Q4|Q9V9Q4_DROME	>tr|Q9V9Q4|Q9V9Q4_DROME CG1416, isoform A OS=Drosophila melanogaster GN=CG1416 PE=1 SV=2	5932700	549450	510780	438160	1815200	1659400	959650	2.95934	1.56528	0.0209919	1.67795	1	CG1416
tr|Q9V9R2|Q9V9R2_DROME	>tr|Q9V9R2|Q9V9R2_DROME Cullin 2, isoform A OS=Drosophila melanogaster GN=Cul2 PE=1 SV=3	214390	19125	44287	19555		67764	63663	2.37613	1.24861	0.0392181	1.40651	1	Cul2
tr|Q9V9T5|Q9V9T5_DROME	>tr|Q9V9T5|Q9V9T5_DROME CG2118, isoform A OS=Drosophila melanogaster GN=CG2118 PE=1 SV=2;>tr|Q8I0S9|Q8I0S9_DROME CG2118, isoform B OS=Drosophila melanogaster GN=CG2118 PE=1 SV=1	2727200	132600	230170	314930	753250	703280	592990	3.02423	1.59657	0.00296316	2.52824	1	CG2118
tr|Q9V9U7|Q9V9U7_DROME	>tr|Q9V9U7|Q9V9U7_DROME Tubulin-specific chaperone A OS=Drosophila melanogaster GN=CG1890 PE=1 SV=1	1121000				448970	293900	378120		10			1	CG1890
tr|Q9V9W2|Q9V9W2_DROME	>tr|Q9V9W2|Q9V9W2_DROME Ribosomal protein L6, isoform A OS=Drosophila melanogaster GN=RpL6 PE=1 SV=1;>tr|Q9V9W3|Q9V9W3_DROME RE08669p OS=Drosophila melanogaster GN=RpL6 PE=1 SV=1	91770000	15591000	9106700	9788600	23809000	17218000	16256000	1.66104	0.732084	0.0728253	1.13772	0	RpL6
tr|Q9V9W4|Q9V9W4_DROME	>tr|Q9V9W4|Q9V9W4_DROME CG1774, isoform A OS=Drosophila melanogaster GN=CG1774 PE=1 SV=1	929930	25143	44669	73452	322350	229230	235090	5.49105	2.45708	0.00296351	2.52819	1	CG1774
tr|Q9V9X7|Q9V9X7_DROME	>tr|Q9V9X7|Q9V9X7_DROME FI18849p1 OS=Drosophila melanogaster GN=PNPase PE=2 SV=2	28854					9866	18988		10			1	CG11337
tr|Q9VA42|Q9VA42_DROME	>tr|Q9VA42|Q9VA42_DROME Niemann-Pick type C-2g, isoform A OS=Drosophila melanogaster GN=Npc2g PE=1 SV=1	48370000	4741900	7105300	5317800	13317000	8616600	9271300	1.81794	0.862303	0.0456612	1.34045	0	Npc2g
tr|Q9VA67|Q9VA67_DROME	>tr|Q9VA67|Q9VA67_DROME Jonah 99Fii OS=Drosophila melanogaster GN=Jon99Fii PE=2 SV=1;>tr|Q9VA66|Q9VA66_DROME Jonah 99Fi OS=Drosophila melanogaster GN=Jon99Fi PE=2 SV=2;>tr|A0A0B4LHX9|A0A0B4LHX9_DROME Jonah 99Ciii, isoform B OS=Drosophila melanogaster GN=Jo	81576			81576					-10			-1	Jon99Fii
tr|Q9VAC1|Q9VAC1_DROME	>tr|Q9VAC1|Q9VAC1_DROME CG7920, isoform A OS=Drosophila melanogaster GN=CG7920 PE=1 SV=1	21523000	2364100	2558500	2203100	5274000	4281000	4842000	2.02043	1.01466	0.0013625	2.86566	1	CG7920
tr|Q9VAC4|Q9VAC4_DROME	>tr|Q9VAC4|Q9VAC4_DROME GEO09167p1 OS=Drosophila melanogaster GN=Nph PE=1 SV=1	35282000	4388000	4381900	3913100	9313900	6248400	7037000	1.78186	0.833382	0.0239043	1.62152	0	Nph
tr|Q9VAI9|Q9VAI9_DROME	>tr|Q9VAI9|Q9VAI9_DROME GEO07291p1 OS=Drosophila melanogaster GN=Obp99c PE=1 SV=1	25093000	3421200	2302100	2319100	7227100	4777900	5046100	2.12015	1.08417	0.0250288	1.60156	1	Obp99c
tr|Q9VAJ2|Q9VAJ2_DROME	>tr|Q9VAJ2|Q9VAJ2_DROME Bub3, isoform A OS=Drosophila melanogaster GN=Bub3 PE=1 SV=1	1242000	482400	306960	394570	58093			0.147204	-2.76411	0.0798782	1.09757	0	Bub3
tr|Q9VAK5|Q9VAK5_DROME	>tr|Q9VAK5|Q9VAK5_DROME NADH dehydrogenase (Ubiquinone) 20 kDa subunit-like, isoform A OS=Drosophila melanogaster GN=ND-20L PE=3 SV=1	478430	206310	125670	78347		68099		0.497888	-1.00611	0.455007	0.341982	0	ND-20L
tr|Q9VAM2|Q9VAM2_DROME	>tr|Q9VAM2|Q9VAM2_DROME Aminopeptidase OS=Drosophila melanogaster GN=CG11951 PE=3 SV=1;>tr|D0IQM1|D0IQM1_DROME MIP13918p OS=Drosophila melanogaster GN=CG11951-RA PE=2 SV=1	43485		21425	22060					-10			-1	CG11951
tr|Q9VAN7|Q9VAN7_DROME	>tr|Q9VAN7|Q9VAN7_DROME Phosphoglycerate mutase OS=Drosophila melanogaster GN=Pglym78 PE=1 SV=2	159200000	14746000	17934000	14362000	54864000	28384000	28912000	2.38425	1.25354	0.0694709	1.1582	0	Pglym78
tr|Q9VAQ0|Q9VAQ0_DROME	>tr|Q9VAQ0|Q9VAQ0_DROME Cullin 5 OS=Drosophila melanogaster GN=Cul5 PE=1 SV=1	68912	17892	26353	24666					-10			-1	Cul5
tr|Q9VAV2|Q9VAV2_DROME	>tr|Q9VAV2|Q9VAV2_DROME FI21480p1 OS=Drosophila melanogaster GN=mIF2 PE=1 SV=2	45707		20302	25406					-10			-1	CG12413
tr|Q9VAW3|Q9VAW3_DROME	>tr|Q9VAW3|Q9VAW3_DROME GH12731p OS=Drosophila melanogaster GN=Gfat2 PE=1 SV=1	430420	56022	43494	209570	48252	31934	41146	0.392551	-1.34905	0.307826	0.511695	0	Gfat2
tr|Q9VAX8|Q9VAX8_DROME	>tr|Q9VAX8|Q9VAX8_DROME CG4849 OS=Drosophila melanogaster GN=CG4849 PE=1 SV=1	72414	44563	27851						-10			-1	CG4849
tr|Q9VAY2|Q9VAY2_DROME	>tr|Q9VAY2|Q9VAY2_DROME Glycoprotein 93 OS=Drosophila melanogaster GN=Gp93 PE=1 SV=1	5387100	1081000	1021800	754310	779700	878280	872090	0.885535	-0.175379	0.359551	0.444239	0	Gp93
tr|Q9VB05|Q9VB05_DROME	>tr|Q9VB05|Q9VB05_DROME ALG-2 interacting protein X OS=Drosophila melanogaster GN=ALiX PE=1 SV=1	493780	39767	74299		178570	74628	126520	2.21929	1.1501	0.187001	0.728155	0	ALiX
tr|Q9VB10|Q9VB10_DROME	>tr|Q9VB10|Q9VB10_DROME CG5590 OS=Drosophila melanogaster GN=CG5590 PE=1 SV=1	1500800	204130	147380	200420	300850	276200	371790	1.71913	0.78168	0.0176955	1.75214	0	CG5590
tr|Q9VB22|Q9VB22_DROME	>tr|Q9VB22|Q9VB22_DROME LD33695p OS=Drosophila melanogaster GN=pins PE=1 SV=1	31059					14189	16870		10			1	pins
tr|Q9VB23|Q9VB23_DROME	>tr|Q9VB23|Q9VB23_DROME BcDNA.LD34343 OS=Drosophila melanogaster GN=wdb PE=1 SV=2	723070	23359	59882	110120	463530	66188		4.10929	2.03889	0.277945	0.55604	0	wdb
tr|Q9VB46|Q9VB46_DROME	>tr|Q9VB46|Q9VB46_DROME FI18644p1 OS=Drosophila melanogaster GN=Hmu PE=1 SV=1	339730	48930	38235	86628	57487	36501	71949	0.954797	-0.0667344	0.890917	0.0501627	0	Hmu
tr|Q9VB64|Q9VB64_DROME	>tr|Q9VB64|Q9VB64_DROME Uncharacterized protein, isoform A OS=Drosophila melanogaster GN=CG42813 PE=1 SV=3	4776500	962480	986600	693430	969280	579290	585460	0.807577	-0.308328	0.348044	0.458366	0	CG42813
tr|Q9VB69|Q9VB69_DROME	>tr|Q9VB69|Q9VB69_DROME Malic enzyme OS=Drosophila melanogaster GN=Men-b PE=1 SV=1	5201100	902670	1073000	990220	1291900	372750	570580	0.753646	-0.408042	0.438885	0.357649	0	Men-b
tr|Q9VBG7|Q9VBG7_DROME	>tr|Q9VBG7|Q9VBG7_DROME Uncharacterized protein, isoform A OS=Drosophila melanogaster GN=CG31086 PE=1 SV=2	29794000	756830	2441500	1779800	6906300	11869000	6040300	4.98492	2.31757	0.024544	1.61006	1	CG31086
tr|Q9VBH7|Q9VBH7_DROME	>tr|Q9VBH7|Q9VBH7_DROME SD21096p OS=Drosophila melanogaster GN=CG14544 PE=1 SV=1	277680	57301	64492			59402	96487	1.27995	0.356088	0.462007	0.335352	0	CG14544
tr|Q9VBH8|Q9VBH8_DROME	>tr|Q9VBH8|Q9VBH8_DROME FI02850p OS=Drosophila melanogaster GN=RpL34a PE=1 SV=2	7318400			172010	4477500	844820	1824100	13.8488	3.79169	0.41565	0.381272	0	RpL34a
tr|Q9VBI2|Q9VBI2_DROME	>tr|Q9VBI2|Q9VBI2_DROME UMP-CMP kinase OS=Drosophila melanogaster GN=Dak1 PE=1 SV=1	7864600	779420	736130	739360	1682200	2094900	1832600	2.48777	1.31485	0.00077146	3.11269	1	Dak1
tr|Q9VBN5|Q9VBN5_DROME	>tr|Q9VBN5|Q9VBN5_DROME 60S ribosomal protein L27 OS=Drosophila melanogaster GN=RpL27 PE=1 SV=1	191420000	17924000	16802000	14512000	55777000	42003000	44407000	2.88775	1.52995	0.0020803	2.68187	1	RpL27
tr|Q9VBP6|Q9VBP6_DROME	>tr|Q9VBP6|Q9VBP6_DROME GH21316p OS=Drosophila melanogaster GN=Ssadh PE=1 SV=1	2966700	408450	311190	388190	512570	520100	826210	1.67795	0.746697	0.0803133	1.09521	0	Ssadh
tr|Q9VBR6|Q9VBR6_DROME	>tr|Q9VBR6|Q9VBR6_DROME RE74917p OS=Drosophila melanogaster GN=tobi PE=2 SV=1	26102000	7771400	6909000	6314200	2182900	1450200	1474700	0.243291	-2.03924	0.000404303	3.39329	-1	tobi
tr|Q9VBS6|Q9VBS6_DROME	>tr|Q9VBS6|Q9VBS6_DROME Uncharacterized protein, isoform A OS=Drosophila melanogaster GN=CG31087 PE=1 SV=2	5456400	264410	731290	679340	1592900	1010300	1178100	2.25744	1.17469	0.0367647	1.43457	1	CG31087
tr|Q9VBS7|Q9VBS7_DROME	>tr|Q9VBS7|Q9VBS7_DROME Uncharacterized protein, isoform B OS=Drosophila melanogaster GN=CG10550 PE=1 SV=1	1721300	287260	157410	142900	429790	167280	536660	1.92952	0.948244	0.200641	0.697581	0	CG10550
tr|Q9VBT1|Q9VBT1_DROME	>tr|Q9VBT1|Q9VBT1_DROME Uncharacterized protein OS=Drosophila melanogaster GN=CG31098 PE=1 SV=2	1826800	158750	257220	261430	229670	422570	497120	1.69672	0.762751	0.142947	0.844824	0	CG31098
tr|Q9VBT4|Q9VBT4_DROME	>tr|Q9VBT4|Q9VBT4_DROME IP12282p OS=Drosophila melanogaster GN=CG31104 PE=2 SV=2	1717600	335440	139540	417850	220480	401490	202840	0.923815	-0.114324	0.838283	0.0766096	0	CG31104
tr|Q9VBT6|Q9VBT6_DROME	>tr|Q9VBT6|Q9VBT6_DROME LP23833p OS=Drosophila melanogaster GN=CG10514 PE=2 SV=1	517090	159510	223620	133960					-10			-1	CG10514
tr|Q9VBT7|Q9VBT7_DROME	>tr|Q9VBT7|Q9VBT7_DROME GH13495p OS=Drosophila melanogaster GN=CG10513 PE=1 SV=2	4263800	1120400	816330	736610	868720	342470	379270	0.594934	-0.749199	0.154636	0.810688	0	CG10513
tr|Q9VBT8|Q9VBT8_DROME	>tr|Q9VBT8|Q9VBT8_DROME IP11925p OS=Drosophila melanogaster GN=CG11878 PE=2 SV=1	8782700	2031400	1871600	733130	1340900	1528900	1276700	0.894388	-0.161027	0.714615	0.145928	0	CG11878
tr|Q9VBU0|Q9VBU0_DROME	>tr|Q9VBU0|Q9VBU0_DROME Uncharacterized protein, isoform A OS=Drosophila melanogaster GN=CG11889 PE=4 SV=2	967380	211240	264830	75201	250140	65725	100250	0.754828	-0.405779	0.603107	0.219606	0	CG11889
tr|Q9VBU2|Q9VBU2_DROME	>tr|Q9VBU2|Q9VBU2_DROME RIO kinase 2 OS=Drosophila melanogaster GN=RIOK2 PE=4 SV=1	179310				66565	47269	65481		10			1	RIOK2
tr|Q9VBU9|Q9VBU9_DROME	>tr|Q9VBU9|Q9VBU9_DROME 40S ribosomal protein S27 OS=Drosophila melanogaster GN=RpS27 PE=1 SV=1	73998000	6154800	2565800	6448000	27522000	13277000	18031000	3.87841	1.95546	0.0290811	1.53639	1	RpS27
tr|Q9VC05|Q9VC05_DROME	>tr|Q9VC05|Q9VC05_DROME Oxysterol-binding protein OS=Drosophila melanogaster GN=Osbp PE=1 SV=1	118660	22928	24839	17743		27339	25809	1.21694	0.283263	0.188719	0.724183	0	Osbp
tr|Q9VC06|Q9VC06_DROME	>tr|Q9VC06|Q9VC06_DROME LD37516p OS=Drosophila melanogaster GN=CG11771 PE=1 SV=1	248490	29317	49807	41098	6332.5	52291	69647	1.06695	0.0934885	0.898764	0.0463545	0	CG11771
tr|Q9VC18|Q9VC18_DROME	>tr|Q9VC18|Q9VC18_DROME RE29555p OS=Drosophila melanogaster GN=CG11089 PE=1 SV=1	24047000	5104100	4178500	3598100	4461900	3246700	3457500	0.866886	-0.206086	0.377948	0.422568	0	CG11089
tr|Q9VC48|Q9VC48_DROME	>tr|Q9VC48|Q9VC48_DROME Methionine aminopeptidase OS=Drosophila melanogaster GN=CG13630 PE=1 SV=1	6039100	231260	661530	432850	2344100	1212600	1156700	3.55557	1.83008	0.0498504	1.30233	1	CG13630
tr|Q9VC92|Q9VC92_DROME	>tr|Q9VC92|Q9VC92_DROME CG6432, isoform A OS=Drosophila melanogaster GN=CG6432 PE=2 SV=1	1331900	153000	293080	226310	363600	148790	147160	0.980904	-0.0278162	0.961102	0.0172304	0	CG6432
tr|Q9VC93|Q9VC93_DROME	>tr|Q9VC93|Q9VC93_DROME Dis3, isoform A OS=Drosophila melanogaster GN=Dis3 PE=1 SV=1	1131400	178250	168170	160860	343290	242770	38091	1.23039	0.299113	0.68724	0.162892	0	Dis3
tr|Q9VCC6|Q9VCC6_DROME	>tr|Q9VCC6|Q9VCC6_DROME CG6178 OS=Drosophila melanogaster GN=CG6178 PE=1 SV=1	4810800	862830	629150	207470	1544700	842920	723760	1.83082	0.872487	0.215248	0.667062	0	CG6178
tr|Q9VCF8|Q9VCF8_DROME	>tr|Q9VCF8|Q9VCF8_DROME CG5854 OS=Drosophila melanogaster GN=CG5854 PE=1 SV=1	124460		31582	41627		51256		1.40026	0.4857	0.341105	0.467112	0	CG5854
tr|Q9VCH8|Q9VCH8_DROME	>tr|Q9VCH8|Q9VCH8_DROME LD23303p OS=Drosophila melanogaster GN=tst PE=2 SV=2	72327					33887	38440		10			1	tst
tr|Q9VCJ8|Q9VCJ8_DROME	>tr|Q9VCJ8|Q9VCJ8_DROME GH28857p OS=Drosophila melanogaster GN=SPE PE=1 SV=2	15152000	2660100	942940	1485100	3295400	3034000	3734200	1.97785	0.983936	0.0385839	1.41359	0	SPE
tr|Q9VCK6|Q9VCK6_DROME	>tr|Q9VCK6|Q9VCK6_DROME LD34157p OS=Drosophila melanogaster GN=CG10184 PE=1 SV=1	3705500	532210	499660	772020	701330	594140	606190	1.0542	0.076148	0.741914	0.129646	0	CG10184
tr|Q9VCQ9|Q9VCQ9_DROME	>tr|Q9VCQ9|Q9VCQ9_DROME Aminoacylase OS=Drosophila melanogaster GN=CG6733 PE=2 SV=1	189950				150060	39886			10			1	CG6733
tr|Q9VCR0|Q9VCR0_DROME	>tr|Q9VCR0|Q9VCR0_DROME Aminoacylase OS=Drosophila melanogaster GN=CG17109 PE=1 SV=1	4791300	430580	548740	258200	1210600	1148500	1194600	2.87163	1.52187	0.000866818	3.06207	1	CG17109
tr|Q9VCR2|Q9VCR2_DROME	>tr|Q9VCR2|Q9VCR2_DROME Aminoacylase OS=Drosophila melanogaster GN=CG6726 PE=1 SV=2	8193600	1722200	1603200	646760	1822300	1270500	1128700	1.06277	0.087832	0.845842	0.0727107	0	CG6726
tr|Q9VCU1|Q9VCU1_DROME	>tr|Q9VCU1|Q9VCU1_DROME CG4721 OS=Drosophila melanogaster GN=CG4721-RA PE=2 SV=2	210400	34841	68944	56962	27901	21754		0.463352	-1.10982	0.115658	0.936823	0	CG4721
tr|Q9VCV4|Q9VCV4_DROME	>tr|Q9VCV4|Q9VCV4_DROME Aconitate hydratase OS=Drosophila melanogaster GN=Irp-1A PE=1 SV=1	1289300	387550	351730	247280	138510	95661	68554	0.306849	-1.7044	0.00818266	2.08711	-1	Irp-1A
tr|Q9VCW6|Q9VCW6_DROME	>tr|Q9VCW6|Q9VCW6_DROME GH03051p OS=Drosophila melanogaster GN=Gclm PE=1 SV=1	8346500	2564800	1744900	1178800	949580	907190	1001200	0.52072	-0.941421	0.0953357	1.02074	0	Gclm
tr|Q9VD00|Q9VD00_DROME	>tr|Q9VD00|Q9VD00_DROME CG5377 OS=Drosophila melanogaster GN=CG5377-RA PE=1 SV=1	460570			282700		84258	93613	0.314593	-1.66844	0.0266028	1.57507	-1	CG5377
tr|Q9VD01|Q9VD01_DROME	>tr|Q9VD01|Q9VD01_DROME LP12095p OS=Drosophila melanogaster GN=Pebp1 PE=1 SV=1	17269000	3164500	1724900	2163400		5574300	4641500	2.17271	1.1195	0.0240621	1.61867	1	Pebp1
tr|Q9VD14|Q9VD14_DROME	>tr|Q9VD14|Q9VD14_DROME GH07286p OS=Drosophila melanogaster GN=CG13850 PE=1 SV=3	76817				32395	21056	23366		10			1	CG13850
tr|Q9VD29|Q9VD29_DROME	>tr|Q9VD29|Q9VD29_DROME RE74312p OS=Drosophila melanogaster GN=Sar1 PE=1 SV=1	495670				214530	138460	142680		10			1	Sar1
tr|Q9VD48|Q9VD48_DROME	>tr|Q9VD48|Q9VD48_DROME CG5791, isoform A OS=Drosophila melanogaster GN=CG5791 PE=2 SV=1	6988600	403870	357230	390670	1980800	1920100	1936000	5.06777	2.34135	2.75396e-07	6.56004	1	CG5791
tr|Q9VD58|Q9VD58_DROME	>tr|Q9VD58|Q9VD58_DROME CG6439, isoform A OS=Drosophila melanogaster GN=CG6439 PE=1 SV=1	65860000	9824500	8619000	6698400	16937000	11985000	11796000	1.61953	0.695573	0.0533461	1.2729	0	CG6439
tr|Q9VD66|Q9VD66_DROME	>tr|Q9VD66|Q9VD66_DROME Female-specific independent of transformer OS=Drosophila melanogaster GN=fit PE=1 SV=1	4224700	538280	617750	697170	758880	850140	762470	1.27967	0.355775	0.0342746	1.46503	0	fit
tr|Q9VD87|Q9VD87_DROME	>tr|Q9VD87|Q9VD87_DROME Aminopeptidase OS=Drosophila melanogaster GN=CG5849 PE=3 SV=2	37454	9490.2		14227		13736		1.15832	0.212028	0.72676	0.138609	0	CG5849
tr|Q9VDC0|Q9VDC0_DROME	>tr|Q9VDC0|Q9VDC0_DROME CG3301, isoform A OS=Drosophila melanogaster GN=CG3301 PE=1 SV=1	709010	95906	109400			221550	282160	2.45346	1.29482	0.0406765	1.39066	1	CG3301
tr|Q9VDC3|Q9VDC3_DROME	>tr|Q9VDC3|Q9VDC3_DROME Adaptor protein complex 2, sigma subunit OS=Drosophila melanogaster GN=AP-2sigma PE=1 SV=1	709230	163090		546140					-10			-1	AP-2sigma
tr|Q9VDF4|Q9VDF4_DROME	>tr|Q9VDF4|Q9VDF4_DROME Cortactin, isoform A OS=Drosophila melanogaster GN=Cortactin PE=1 SV=1	3435500	345290	348950	271030	961370	726540	782340	2.55913	1.35565	0.00262978	2.58008	1	Cortactin
tr|Q9VDH8|Q9VDH8_DROME	>tr|Q9VDH8|Q9VDH8_DROME 40S ribosomal protein S30 OS=Drosophila melanogaster GN=RpS30 PE=1 SV=1	1135300				463880	325180	346200		10			1	RpS30
tr|Q9VDK7|Q9VDK7_DROME	>tr|Q9VDK7|Q9VDK7_DROME Signal recognition particle subunit SRP72 OS=Drosophila melanogaster GN=Srp72 PE=1 SV=1	1159200	226560	177220	138860	171200	234330	211050	1.13626	0.184293	0.475976	0.322415	0	Srp72
tr|Q9VDL0|Q9VDL0_DROME	>tr|Q9VDL0|Q9VDL0_DROME Signal recognition particle protein 14 OS=Drosophila melanogaster GN=Srp14 PE=1 SV=2	396010				169600	96111	130300		10			1	Srp14
tr|Q9VDP9|Q9VDP9_DROME	>tr|Q9VDP9|Q9VDP9_DROME S-formylglutathione hydrolase OS=Drosophila melanogaster GN=CG4390 PE=1 SV=1;>tr|Q7KSB5|Q7KSB5_DROME S-formylglutathione hydrolase OS=Drosophila melanogaster GN=CG4390 PE=1 SV=1	6718900	405780	1115200	1059900	1592100	1374100	1171800	1.60333	0.681071	0.114693	0.940464	0	CG4390
tr|Q9VDT1|Q9VDT1_DROME	>tr|Q9VDT1|Q9VDT1_DROME Arc42 OS=Drosophila melanogaster GN=Arc42 PE=1 SV=1	3697900	514350	448320	455660	763310	656920	859310	1.6072	0.684549	0.00984614	2.00673	0	Arc42
tr|Q9VDV2|Q9VDV2_DROME	>tr|Q9VDV2|Q9VDV2_DROME AT06125p OS=Drosophila melanogaster GN=CG6195 PE=1 SV=1	1380800	305310	176570	144280	230890	259520	264230	1.20519	0.269257	0.442315	0.354268	0	CG6195
tr|Q9VDX6|Q9VDX6_DROME	>tr|Q9VDX6|Q9VDX6_DROME Uncharacterized protein OS=Drosophila melanogaster GN=CG18493 PE=4 SV=2	169260			169260					-10			-1	CG18493
tr|Q9VDZ8|Q9VDZ8_DROME	>tr|Q9VDZ8|Q9VDZ8_DROME Mitochondrial import inner membrane translocase subunit TIM44 OS=Drosophila melanogaster GN=CG11779-RB PE=1 SV=1;>tr|Q9VDZ7|Q9VDZ7_DROME Mitochondrial import inner membrane translocase subunit TIM44 OS=Drosophila melanogaster GN=CG1	314560	103090	57831	50967		51164	51504	0.726809	-0.460353	0.42808	0.368475	0	CG11779
tr|Q9VE10|Q9VE10_DROME	>tr|Q9VE10|Q9VE10_DROME Uncharacterized protein OS=Drosophila melanogaster GN=CG14285 PE=4 SV=1	1861200	106260	57721	67140	824380	386760	418940	7.05293	2.81822	0.0301235	1.52109	1	CG14285
tr|Q9VE57|Q9VE57_DROME	>tr|Q9VE57|Q9VE57_DROME CG7695 OS=Drosophila melanogaster GN=CG7695 PE=2 SV=1	4787300	451900	288730	242270	1416600	1217600	1170300	3.87069	1.95259	0.000676263	3.16988	1	CG7695
tr|Q9VE75|Q9VE75_DROME	>tr|Q9VE75|Q9VE75_DROME V-type proton ATPase subunit a OS=Drosophila melanogaster GN=Vha100-2 PE=1 SV=2	86808					52736	34073		10			1	Vha100-2
tr|Q9VE79|Q9VE79_DROME	>tr|Q9VE79|Q9VE79_DROME Uncharacterized protein OS=Drosophila melanogaster GN=CG14309 PE=1 SV=2	82913			48666	34247			0.703715	-0.506937			0	CG14309
tr|Q9VE85|Q9VE85_DROME	>tr|Q9VE85|Q9VE85_DROME Nucleoporin 43kD OS=Drosophila melanogaster GN=Nup43 PE=1 SV=1	211850	75669	45690	44979		45511		0.820817	-0.284868	0.671914	0.172686	0	Nup43
tr|Q9VEA1|Q9VEA1_DROME	>tr|Q9VEA1|Q9VEA1_DROME Eukaryotic initiation factor 1A, isoform A OS=Drosophila melanogaster GN=eIF1A PE=1 SV=1	31993000	4926900	3951300	3366300	6856300	6084200	6807600	1.61281	0.68958	0.00853624	2.06873	0	eIF-1A
tr|Q9VEB1|Q9VEB1_DROME	>tr|Q9VEB1|Q9VEB1_DROME IP09655p OS=Drosophila melanogaster GN=Mdh2 PE=1 SV=1	87932000	14479000	16626000	12964000	16342000	13485000	14037000	0.995348	-0.00672678	0.962781	0.0164723	0	Mdh2
tr|Q9VEC2|Q9VEC2_DROME	>tr|Q9VEC2|Q9VEC2_DROME LP02120p OS=Drosophila melanogaster GN=CG12321-RA PE=1 SV=1	1489600	203420	189180	89496	312450	336460	358620	2.08989	1.06343	0.0101798	1.99226	1	CG12321
tr|Q9VEC8|Q9VEC8_DROME	>tr|Q9VEC8|Q9VEC8_DROME CG7215, isoform A OS=Drosophila melanogaster GN=Prx5-RA PE=1 SV=1	969590				405830	138400	425360		10			1	CG7215
tr|Q9VED8|Q9VED8_DROME	>tr|Q9VED8|Q9VED8_DROME Deoxyribonuclease II OS=Drosophila melanogaster GN=DNaseII PE=1 SV=1	373510		50253	52725	161300	109230		2.62707	1.39345	0.0846813	1.07221	0	DNaseII
tr|Q9VEJ0|Q9VEJ0_DROME	>tr|Q9VEJ0|Q9VEJ0_DROME Peroxiredoxin 3 OS=Drosophila melanogaster GN=Prx3 PE=1 SV=2	20686000	4804500	2808400	2040400	4416400	3629900	2986600	1.14291	0.192718	0.644014	0.191104	0	Prx3
tr|Q9VEJ3|Q9VEJ3_DROME	>tr|Q9VEJ3|Q9VEJ3_DROME Pyrroline-5-carboxylate reductase OS=Drosophila melanogaster GN=P5cr-2 PE=1 SV=1;>tr|Q8IN96|Q8IN96_DROME Pyrroline-5-carboxylate reductase-like 2, isoform B OS=Drosophila melanogaster GN=P5cr-2 PE=1 SV=1;>tr|A0A0B4KGC5|A0A0B4KGC5_DR	962130	201850	250530	45124	251290	108240	105110	0.933942	-0.0985948	0.895781	0.047798	0	P5cr-2
tr|Q9VEK7|Q9VEK7_DROME	>tr|Q9VEK7|Q9VEK7_DROME Cellular repressor of E1A-stimulated genes, isoform A OS=Drosophila melanogaster GN=CREG PE=1 SV=1;>tr|Q8IN97|Q8IN97_DROME Cellular repressor of E1A-stimulated genes, isoform C OS=Drosophila melanogaster GN=CREG PE=4 SV=1	4567900	281590	264220		760740	1261500	1999800	4.91263	2.29649	0.105172	0.978099	0	CREG
tr|Q9VEK8|Q9VEK8_DROME	>tr|Q9VEK8|Q9VEK8_DROME GH07711p OS=Drosophila melanogaster GN=sds22 PE=1 SV=1	1553400	400990	392770	442890	258850		57941	0.384253	-1.37987	0.0466098	1.33152	-1	sds22
tr|Q9VEN6|Q9VEN6_DROME	>tr|Q9VEN6|Q9VEN6_DROME Mitochondrial ribosomal protein S11 OS=Drosophila melanogaster GN=mRpS11 PE=1 SV=1	166990			42302	124680			2.94738	1.55943			0	mRpS11
tr|Q9VEP3|Q9VEP3_DROME	>tr|Q9VEP3|Q9VEP3_DROME CG4009, isoform B OS=Drosophila melanogaster GN=CG4009 PE=4 SV=2	31548	16995	14553						-10			-1	CG4009
tr|Q9VEP6|Q9VEP6_DROME	>tr|Q9VEP6|Q9VEP6_DROME Adenylosuccinate lyase OS=Drosophila melanogaster GN=AdSL PE=1 SV=1	1894600	50519	74452	1016100	263600	220770	269120	0.660336	-0.598728	0.705612	0.151434	0	AdSL
tr|Q9VEP8|Q9VEP8_DROME	>tr|Q9VEP8|Q9VEP8_DROME GH11385p OS=Drosophila melanogaster GN=Irc PE=1 SV=2	823820	85983	111970	45756	225510	157690	196900	2.3803	1.25114	0.0151686	1.81905	1	Irc
tr|Q9VEP9|Q9VEP9_DROME	>tr|Q9VEP9|Q9VEP9_DROME GH03554p OS=Drosophila melanogaster GN=Sf3a1 PE=1 SV=1	50790				50790				10			1	CG16941
tr|Q9VEQ0|Q9VEQ0_DROME	>tr|Q9VEQ0|Q9VEQ0_DROME CG3534 OS=Drosophila melanogaster GN=CG3534 PE=1 SV=1	1601000	450440	426760	352400	51628	95458	224300	0.302038	-1.7272	0.0086728	2.06184	-1	CG3534
tr|Q9VES8|Q9VES8_DROME	>tr|Q9VES8|Q9VES8_DROME RE28913p OS=Drosophila melanogaster GN=CG10340 PE=1 SV=3	7292100	626050	632500	452290	3396300	1070600	1114400	3.26232	1.7059	0.169271	0.771416	0	CG10340
tr|Q9VET9|Q9VET9_DROME	>tr|Q9VET9|Q9VET9_DROME AT03047p OS=Drosophila melanogaster GN=Decay PE=1 SV=1	863430				196720	345190	321520		10			1	Decay
tr|Q9VEV5|Q9VEV5_DROME	>tr|Q9VEV5|Q9VEV5_DROME GEO12522p1 OS=Drosophila melanogaster GN=mRpS33 PE=2 SV=1	812250	28676		93701		318410	371460	5.63725	2.49499	0.0211759	1.67416	1	mRpS33
tr|Q9VEV7|Q9VEV7_DROME	>tr|Q9VEV7|Q9VEV7_DROME LD36454p OS=Drosophila melanogaster GN=CG17565 PE=1 SV=1	379560				69028	158220	152310		10			1	CG17565
tr|Q9VF15|Q9VF15_DROME	>tr|Q9VF15|Q9VF15_DROME GEO09476p1 OS=Drosophila melanogaster GN=glob1 PE=1 SV=1	1857800	454900	410160	453760	538980			1.22605	0.294018	0.0777447	1.10933	0	glob1
tr|Q9VF24|Q9VF24_DROME	>tr|Q9VF24|Q9VF24_DROME Crossveinless d OS=Drosophila melanogaster GN=cv-d PE=1 SV=2	9981800	1651400	1694300	1596800	2133300	1466500	1439600	1.01961	0.028011	0.894481	0.0484288	0	cv-d
tr|Q9VF27|Q9VF27_DROME	>tr|Q9VF27|Q9VF27_DROME GM02062p OS=Drosophila melanogaster GN=ND-23 PE=1 SV=1	3024600	602300	499320	361540	648190	434710	478530	1.06716	0.0937804	0.748623	0.125737	0	ND-23
tr|Q9VF51|Q9VF51_DROME	>tr|Q9VF51|Q9VF51_DROME Aldehyde oxidase 3, isoform A OS=Drosophila melanogaster GN=AOX3 PE=1 SV=1	11308000	1720000	1774900	1738900	2306000	1754900	2013000	1.16051	0.214764	0.154993	0.809687	0	AOX3
tr|Q9VF53|Q9VF53_DROME	>tr|Q9VF53|Q9VF53_DROME Aldehyde oxidase 1 OS=Drosophila melanogaster GN=AOX1 PE=1 SV=1	9093600	1251900	1255400	936400	2024800	1783500	1841500	1.64062	0.71424	0.00459435	2.33778	0	AOX1
tr|Q9VF83|Q9VF83_DROME	>tr|Q9VF83|Q9VF83_DROME LD33178p OS=Drosophila melanogaster GN=CG12258 PE=1 SV=2	404520	68102		34328		176840	125250	2.94923	1.56034	0.0835935	1.07783	0	CG31301
tr|Q9VF86|Q9VF86_DROME	>tr|Q9VF86|Q9VF86_DROME CG6218, isoform A OS=Drosophila melanogaster GN=CG6218 PE=1 SV=1	176630	47069	50653			78904		1.61487	0.691415	0.0655386	1.1835	0	CG6218
tr|Q9VFC1|Q9VFC1_DROME	>tr|Q9VFC1|Q9VFC1_DROME CG6687 protein OS=Drosophila melanogaster GN=Spn88Eb PE=2 SV=1	9335.5			9335.5					-10			-1	Spn88Eb
tr|Q9VFE9|Q9VFE9_DROME	>tr|Q9VFE9|Q9VFE9_DROME CG7265 OS=Drosophila melanogaster GN=CG7265 PE=1 SV=1	127230	40073	41424	45733					-10			-1	CG7265
tr|Q9VFF0|Q9VFF0_DROME	>tr|Q9VFF0|Q9VFF0_DROME GH01077p OS=Drosophila melanogaster GN=UQCR-C1 PE=1 SV=2	17446000	2834400	3153000	2107900	2969400	3178300	3203500	1.15514	0.208067	0.258428	0.587661	0	UQCR-C1
tr|Q9VFF3|Q9VFF3_DROME	>tr|Q9VFF3|Q9VFF3_DROME Rrp6, isoform B OS=Drosophila melanogaster GN=Rrp6 PE=1 SV=3	98528	21160	27571	8482.7	21143	11481	8689.8	0.722096	-0.469737	0.476817	0.321649	0	Rrp6
tr|Q9VFI3|Q9VFI3_DROME	>tr|Q9VFI3|Q9VFI3_DROME CG8066, isoform A OS=Drosophila melanogaster GN=CG8066 PE=1 SV=1	6317900	392710	564440	435590	1874200	1464500	1586500	3.53634	1.82226	0.000872127	3.05942	1	CG8066
tr|Q9VFP5|Q9VFP5_DROME	>tr|Q9VFP5|Q9VFP5_DROME CG9925 OS=Drosophila melanogaster GN=CG9925 PE=2 SV=1	172780	15234	17850	50033	29878	15598	44192	1.07882	0.10945	0.882815	0.0541303	0	CG9925
tr|Q9VFQ9|Q9VFQ9_DROME	>tr|Q9VFQ9|Q9VFQ9_DROME Dipeptidase B, isoform A OS=Drosophila melanogaster GN=Dip-B PE=1 SV=2	28810000	4844200	4713500	3144400	5764200	5954100	4390100	1.26817	0.342746	0.197552	0.704318	0	Dip-B
tr|Q9VFT4|Q9VFT4_DROME	>tr|Q9VFT4|Q9VFT4_DROME AT27578p OS=Drosophila melanogaster GN=rin PE=1 SV=1	3643500	296740	291640	264000	1115700	806450	868990	3.27453	1.71129	0.0024347	2.61355	1	rin
tr|Q9VFV9|Q9VFV9_DROME	>tr|Q9VFV9|Q9VFV9_DROME DnaJ-like-2, isoform A OS=Drosophila melanogaster GN=Droj2 PE=1 SV=1	6380800	607960	774150	479920	1620000	1466800	1432000	2.42681	1.27906	0.00100196	2.99915	1	Droj2
tr|Q9VFW4|Q9VFW4_DROME	>tr|Q9VFW4|Q9VFW4_DROME MIP09035p OS=Drosophila melanogaster GN=poly PE=1 SV=1	634670	97617	374240		98603	64219		0.345066	-1.53505	0.383049	0.416746	0	poly
[truncated: 423 more rows]

## Sheet: Fig 7 H (ND LpR1 RNAi)
FED(LpR1 RNAi~BD-AD-AKHR)	M17-4.29																M18-4.29																M18-4.29
[truncated: 120 more rows]
[truncated: 250 more columns]

[truncated: 1 more sheets: Fig 7 H (HFD LpR1 RNAi)]
