# Supplementary material for: High-fat diet enhances starvation-induced hyperactivity via sensitizing hunger-sensing neurons in Drosophila
Source: eLife journal article supplement (doi:10.7554/elife.53103), 2020-04-23
Supplement: supp [file elife-53103-supp-v1.zip › elife_poa_e53103_Figure_8_source_data_1.xlsx]

## Sheet: Fig 8 G (ND LpR1 RNAi)
FED(LpR1 RNAi~PPL)	M10-5.19																M10-5.19															M11-5.18																	+sucrose
20:30:00	40	41	38	43	39	72	45	57	42	41	43	71	41	34	38	41	68	35	45	91	50	56	61	66	39	58	53	42	61	49	36	41	45	46	43	60	57	22	19	56	59	71	46	49	65	52	45		49.1915
21:00:00	8	23	13	53	31	40	12	34	22	40	20	19	17	25	24	41	36	18	63	68	36	64	50	40	21	41	34	35	43	53	34	60	55	52	50	44	51	50	34	34	45	47	41	37	58	53	39		38.4681
21:30:00	0	6	5	2	38	39	6	35	6	21	5	27	6	25	12	16	59	19	42	64	37	45	55	27	11	23	42	23	25	21	41	48	33	36	47	41	50	38	29	31	46	32	32	34	41	94	34		30.8298
22:00:00	0	0	0	2	27	16	1	14	0	13	0	0	1	5	5	3	31	3	2	65	27	28	33	0	9	22	11	2	1	4	22	35	25	42	49	24	38	19	19	15	17	27	11	22	19	133	12		18.1702
22:30:00	0	0	0	6	7	0	0	0	0	1	0	0	0	0	0	0	3	3	0	11	6	8	1	0	0	4	13	0	0	0	6	3	0	0	1	0	6	0	0	0	1	1	0	0	0	28	0		2.31915
23:00:00	0	0	0	16	0	1	0	0	0	0	0	0	0	0	0	0	0	0	0	0	0	3	0	0	13	0	1	0	0	0	0	0	0	13	0	0	0	0	0	0	0	0	18	0	0	2	0		1.42553
23:30:00	0	0	0	9	0	2	0	0	0	0	24	0	0	0	0	19	0	15	0	0	3	7	0	0	0	0	2	0	0	0	0	0	0	0	0	0	7	0	0	0	0	0	0	0	0	0	0		1.87234
00:00:00	0	0	0	0	0	6	0	13	0	31	7	0	0	0	0	0	0	0	0	0	0	2	5	0	0	0	0	0	0	0	0	0	0	1	0	0	0	0	15	0	0	0	0	0	0	0	0		1.70213
00:30:00	0	0	0	3	0	0	0	0	0	9	5	0	0	0	0	0	0	0	0	0	9	2	0	0	0	0	1	0	0	0	0	0	0	0	0	0	0	0	0	0	0	0	0	0	0	0	0		0.617021
01:00:00	0	0	0	0	0	4	0	0	0	0	0	0	0	0	0	0	0	0	0	0	58	11	5	0	0	0	0	0	0	0	0	0	0	0	0	0	0	0	0	0	0	0	0	0	0	10	0		1.87234
01:30:00	28	5	0	30	0	0	0	0	0	0	2	26	0	24	0	1	24	0	0	55	0	9	4	0	0	0	0	0	0	0	7	0	0	0	0	0	0	75	0	0	0	0	36	5	0	7	0		7.19149
02:00:00	11	0	0	43	0	29	5	0	37	23	0	21	0	14	0	0	57	0	0	35	0	0	3	68	0	0	0	0	0	0	54	0	0	0	0	0	0	22	0	0	0	0	39	0	0	5	0		9.91489
02:30:00	0	1	30	0	0	0	9	0	0	0	0	0	0	0	0	0	0	0	0	0	0	0	0	23	0	42	0	0	0	45	0	0	0	0	0	54	0	0	0	0	0	0	0	5	0	0	8		4.61702
03:00:00	0	0	4	0	0	0	0	0	0	0	0	0	0	16	0	0	3	0	56	0	38	0	0	0	0	0	0	0	5	0	0	19	43	0	0	0	0	0	0	0	43	32	0	0	0	3	0		5.57447
03:30:00	0	12	12	0	0	27	0	0	0	12	0	0	0	7	0	0	34	0	0	0	29	0	8	9	0	0	0	0	2	0	0	41	15	0	0	0	0	0	0	0	0	14	0	44	0	0	0		5.65957
04:00:00	0	0	3	0	0	8	0	38	0	0	0	0	0	0	0	0	0	11	0	11	0	0	92	0	0	0	8	0	0	0	0	0	0	0	12	0	10	0	0	0	0	0	0	2	0	0	0		4.14894
04:30:00	0	0	0	8	0	3	0	0	41	0	0	0	0	0	0	0	0	64	0	62	2	0	0	0	0	0	61	17	0	0	0	0	0	0	33	0	53	0	20	0	0	0	0	0	0	0	0		7.74468
05:00:00	25	0	0	34	0	0	0	0	0	27	0	0	0	0	0	0	0	0	0	7	0	0	0	2	0	2	0	41	0	0	0	43	0	0	0	0	0	68	6	0	0	0	0	0	0	0	0		5.42553
05:30:00	2	0	0	0	43	26	0	0	0	27	0	0	0	0	0	0	41	10	0	0	0	0	0	0	39	0	0	0	0	0	0	0	0	41	0	35	0	10	0	0	0	0	0	0	0	0	0		5.82979
06:00:00	0	23	0	21	7	42	0	0	0	0	24	18	0	23	14	33	11	0	0	15	92	0	0	0	0	0	0	0	12	37	0	0	0	50	0	0	1	0	14	0	0	0	0	0	37	0	0		10.0851
06:30:00	0	28	0	78	0	0	40	0	6	0	3	25	0	18	15	23	0	16	0	37	0	54	11	17	0	3	26	0	0	0	0	0	0	5	0	0	45	0	13	0	0	0	0	0	11	0	0		10.0851
07:00:00	0	0	19	0	2	40	12	38	0	19	0	17	0	15	46	13	39	0	0	9	0	37	57	51	0	0	10	0	0	0	8	48	38	0	25	73	39	3	6	60	63	31	28	33	32	55	27		21.1277
07:30:00	2	0	0	0	28	23	3	0	0	0	12	19	0	2	1	3	0	9	0	28	0	17	0	3	0	0	0	0	0	0	35	0	28	0	14	0	0	25	0	12	28	10	52	0	4	8	0		7.78723
08:00:00	0	0	17	59	16	31	0	12	36	15	20	25	0	9	32	32	22	0	0	0	19	6	0	0	17	31	0	0	12	53	0	10	20	0	26	26	43	0	18	13	35	0	33	0	33	18	9		15.9149
08:30:00	42	28	40	56	34	54	50	52	33	34	25	57	30	43	38	36	64	14	44	29	51	9	61	46	26	40	53	51	64	36	34	65	47	48	59	51	60	21	18	51	58	32	54	38	42	47	55		42.9787
09:00:00	28	30	32	40	20	34	44	16	39	28	36	52	58	28	17	26	41	19	21	39	30	10	39	50	17	27	23	33	16	10	20	44	20	45	34	59	23	24	9	37	63	26	57	39	18	54	33		32.0851
09:30:00	33	29	28	50	40	40	37	27	29	21	46	40	24	17	29	8	49	10	21	27	12	4	37	33	15	26	25	34	18	14	18	36	25	14	36	46	19	16	14	33	27	31	48	36	26	34	36		28.0426
10:00:00	30	32	29	35	20	44	27	24	29	21	35	39	21	21	12	20	55	19	24	48	25	18	30	31	7	21	21	15	25	15	27	53	19	12	44	56	36	27	26	48	32	32	41	35	19	41	34		29.2553
10:30:00	21	26	30	28	17	37	24	34	26	27	23	28	22	16	4	16	27	12	15	39	14	6	25	23	9	20	23	25	8	14	29	32	16	14	33	52	42	6	14	30	39	20	26	48	13	32	23		23.5745
11:00:00	26	17	24	52	19	30	23	6	25	27	41	35	25	23	11	13	34	13	9	38	17	11	37	33	17	29	26	15	5	2	21	38	13	7	50	48	41	17	10	31	29	22	28	23	15	37	24		24.1915
11:30:00	28	18	18	29	16	20	20	7	26	19	33	17	14	16	3	21	38	10	12	30	13	14	19	10	5	22	8	9	7	22	17	30	12	13	33	29	37	15	15	30	22	13	27	24	22	24	17		19.234
12:00:00	19	27	15	24	13	23	18	6	29	20	22	23	21	19	11	9	23	2	2	25	11	6	30	24	7	10	24	41	4	17	12	23	6	10	19	28	17	8	16	19	43	16	23	30	8	12	17		17.7021
12:30:00	9	16	16	26	0	15	10	0	27	11	18	26	15	9	2	7	15	7	0	8	4	5	15	32	17	2	25	41	4	18	15	38	8	10	38	30	44	0	7	38	25	9	23	29	15	24	13		16.2979
13:00:00	24	22	22	36	14	26	12	7	20	25	23	20	12	10	3	20	0	6	8	14	12	4	23	11	15	10	20	0	2	10	9	11	4	14	22	19	18	24	22	19	27	27	11	22	19	13	3		15.2128
13:30:00	13	10	4	31	10	29	12	8	22	23	19	3	13	9	16	10	0	13	12	34	16	15	15	21	14	11	8	7	9	2	3	20	21	16	19	29	15	10	18	18	17	11	13	14	5	8	0		13.7447
14:00:00	9	12	15	30	12	23	13	7	23	12	42	10	8	10	5	11	0	10	6	23	6	2	14	2	14	18	21	0	12	8	3	2	6	0	13	8	12	0	14	7	22	4	25	35	2	8	0		11.4681
14:30:00	15	10	14	16	6	15	3	2	6	5	35	12	12	3	6	13	0	3	5	17	5	14	13	14	4	16	14	0	0	8	0	3	0	8	15	16	0	8	17	3	21	0	0	4	23	5	0		8.70213
15:00:00	3	5	0	16	6	13	6	0	0	11	8	3	2	11	3	6	0	3	2	16	9	4	10	0	15	3	8	0	0	0	0	17	18	13	17	16	36	21	0	2	17	21	66	22	3	4	0		9.2766
15:30:00	11	8	0	17	0	24	4	0	4	0	8	0	0	4	3	6	0	0	0	12	2	1	6	0	13	6	0	0	0	0	0	20	2	13	18	16	23	12	23	26	17	28	25	34	8	31	38		9.85106
16:00:00	2	0	0	24	0	11	8	0	0	2	0	0	8	6	0	4	0	4	0	13	10	2	0	0	0	0	0	0	0	8	0	0	0	0	0	7	0	0	10	5	5	0	2	0	1	6	0		2.93617
16:30:00	1	0	38	23	20	2	0	0	17	2	1	7	0	4	0	7	0	0	0	0	10	5	17	45	7	0	0	0	13	0	0	10	0	14	18	22	19	15	18	19	23	0	39	14	0	14	4		9.53191
17:00:00	11	7	17	19	20	3	16	0	13	14	22	10	0	12	0	8	0	0	0	14	0	0	0	6	8	0	21	60	0	0	0	29	7	12	47	61	59	21	15	33	54	29	21	20	20	49	18		16.5106
17:30:00	5	5	0	25	0	7	2	8	0	13	27	6	0	2	0	11	0	21	0	16	7	2	35	11	4	13	3	17	3	7	0	33	2	33	29	34	28	18	11	27	33	39	24	22	8	26	23		13.617
18:00:00	1	0	13	23	9	10	9	0	4	12	3	3	0	2	13	10	0	0	2	3	7	0	9	1	0	0	0	0	0	0	0	0	0	0	4	21	13	0	25	1	8	0	0	22	22	12	0		5.57447
18:30:00	2	14	14	21	7	11	8	12	11	13	15	6	17	9	16	7	0	7	13	22	0	22	13	1	4	0	22	24	0	2	0	10	12	25	34	21	31	25	20	16	26	6	14	12	2	31	9		12.9149
19:00:00	6	0	15	24	8	14	5	2	3	7	10	0	12	2	5	14	50	6	14	18	4	0	6	25	7	4	7	32	0	10	0	11	0	35	27	13	14	0	9	26	20	23	17	13	7	10	5		11.4894
19:30:00	15	9	9	17	2	29	22	7	18	19	24	12	10	14	4	9	24	17	15	11	21	0	5	39	2	7	21	23	24	8	0	28	29	26	55	27	20	13	14	16	40	26	29	37	13	21	9		17.8723
20:00:00	12	3	15	17	9	11	22	18	16	19	22	22	13	11	13	14	38	2	8	23	10	3	10	25	18	11	21	20	8	12	16	26	16	13	20	26	28	18	11	16	33	26	29	48	24	20	13		17.6383
20:30:00	39	40	36	45	37	39	34	29	59	62	42	66	60	44	28	32	74	25	36	45	42	33	46	57	25	27	40	39	33	50	36	47	52	31	37	64	34	47	21	61	65	52	54	55	61	51	37		44.0213
21:00:00	7	16	9	15	39	18	13	23	12	38	19	29	40	9	24	35	53	19	20	34	31	34	41	31	25	32	35	31	2	25	27	54	38	35	44	62	32	36	33	53	65	40	52	45	62	40	44		32.3617
21:30:00	0	13	0	5	10	15	42	13	0	8	10	1	11	3	9	13	55	19	31	36	16	24	59	18	8	16	31	18	2	3	25	39	37	34	49	48	40	46	46	52	57	36	53	32	53	73	38		26.5319
22:00:00	0	0	0	35	6	6	20	1	0	35	1	0	0	0	0	31	31	16	24	19	0	12	11	1	2	11	23	5	35	0	1	43	26	15	19	33	26	6	28	11	23	14	30	19	33	11	33		14.8085
22:30:00	0	0	0	0	0	0	0	17	19	0	0	0	0	23	0	15	0	29	0	4	0	0	0	15	0	15	0	0	1	0	0	21	2	0	2	9	13	0	4	0	9	0	5	0	4	5	3		4.57447
23:00:00	0	0	0	0	2	0	27	2	0	2	0	15	0	5	1	8	0	1	0	0	0	11	0	20	0	8	3	2	49	0	14	0	0	0	13	0	0	0	0	0	0	0	0	0	0	0	0		3.89362
23:30:00	0	0	0	19	0	1	0	36	34	14	1	24	6	33	45	0	0	10	0	0	0	2	0	0	0	0	0	2	8	0	9	0	0	0	0	0	0	0	0	0	0	0	0	0	0	0	0		5.19149
00:00:00	0	0	0	35	0	20	0	21	0	0	26	0	0	0	4	0	0	0	0	0	0	33	0	0	0	0	0	0	0	0	0	0	9	0	1	0	0	0	0	0	0	0	0	0	0	0	0		3.17021
00:30:00	0	0	0	0	8	0	0	2	0	0	0	0	0	4	0	0	0	0	0	0	0	0	0	0	10	24	0	0	0	0	3	0	0	0	4	0	5	0	0	0	0	0	0	0	0	0	0		1.2766
01:00:00	0	0	0	7	0	23	0	17	0	37	0	0	12	14	0	12	32	5	0	0	10	0	0	37	22	0	48	1	0	0	0	0	2	0	0	0	45	0	0	0	0	0	0	0	0	0	0		6.89362
01:30:00	0	0	28	27	20	0	0	21	31	10	0	33	11	0	0	0	75	0	0	0	41	0	0	0	0	0	0	6	0	40	0	0	1	0	0	0	0	67	0	0	0	0	0	0	0	0	0		8.74468
02:00:00	0	0	0	0	0	0	0	0	0	0	0	0	7	0	0	0	0	53	0	0	0	0	0	2	0	0	0	3	0	0	0	0	2	0	0	0	0	16	32	0	0	0	0	0	0	0	0		2.44681
02:30:00	0	0	18	0	2	0	17	0	0	0	16	0	15	40	0	0	0	10	0	0	0	0	0	24	0	0	0	30	0	0	0	0	0	0	6	0	0	0	0	0	1	0	0	0	0	0	0		3.80851
03:00:00	2	0	4	0	0	20	3	16	0	0	0	0	2	10	0	21	48	2	0	60	0	0	60	0	0	0	26	33	30	0	0	0	0	0	0	0	0	11	6	28	0	0	0	0	0	0	0		8.12766
03:30:00	36	0	17	0	44	16	12	16	0	28	0	0	0	43	0	0	0	14	0	10	19	0	0	0	0	0	48	0	15	0	0	0	0	0	0	52	0	0	0	15	51	0	0	0	0	5	0		9.38298
04:00:00	0	2	43	0	33	0	0	0	36	19	0	0	0	7	0	0	0	0	0	0	3	0	4	23	0	0	0	0	0	0	0	0	0	0	0	0	22	0	0	0	0	0	0	0	0	35	0		4.82979
04:30:00	1	46	5	0	0	0	0	0	1	0	0	0	0	0	0	0	0	0	0	0	0	0	0	8	16	0	0	0	0	0	0	22	0	0	0	0	0	105	39	0	0	0	65	0	32	6	0		7.3617
05:00:00	3	2	0	0	0	36	0	0	0	2	0	0	0	0	47	0	58	0	0	0	0	40	0	0	21	0	0	0	0	0	0	0	30	0	0	0	0	32	1	0	0	0	32	0	7	0	0		6.61702
05:30:00	0	1	0	59	0	0	17	0	1	0	0	0	0	0	0	0	0	3	0	0	0	0	13	0	0	0	2	0	0	0	0	0	14	0	36	0	0	5	21	0	0	0	0	27	0	0	0		4.23404
06:00:00	0	2	0	15	0	13	8	0	0	0	0	16	0	0	0	0	0	10	0	0	0	0	0	0	0	0	39	0	0	27	9	0	0	0	3	0	0	46	0	0	0	0	0	37	0	6	0		4.91489
06:30:00	20	0	0	13	7	21	0	0	28	3	0	25	14	12	0	16	15	0	0	49	28	0	14	16	0	0	0	0	0	0	20	0	0	53	7	0	28	12	43	7	0	13	30	0	0	4	23		11.0851
07:00:00	0	10	0	16	13	0	0	1	0	33	0	1	12	34	24	15	36	0	0	4	9	0	22	19	0	0	0	0	30	0	0	10	44	30	28	24	19	27	18	70	20	29	42	13	50	24	4		15.5532
07:30:00	13	4	26	53	0	19	7	32	0	3	6	39	0	46	29	4	54	2	0	0	16	0	29	23	11	10	7	0	0	0	0	36	45	0	1	7	10	7	26	20	59	2	4	26	28	24	0		15.4894
08:00:00	4	31	6	4	0	22	0	29	26	0	33	29	0	5	0	0	0	29	0	0	0	0	0	0	3	21	26	0	0	33	0	16	26	42	8	16	5	35	0	42	38	0	39	0	18	15	18		13.1702
08:30:00	22	34	38	53	25	45	42	23	43	41	33	41	37	40	36	27	52	20	41	43	39	18	55	82	15	21	37	57	30	21	45	38	28	36	50	55	49	31	32	28	75	34	44	45	25	44	47		38.6596
09:00:00	19	17	36	37	22	22	22	16	29	28	44	46	21	25	21	7	46	17	8	33	18	20	28	28	17	17	24	52	15	10	28	32	35	25	33	46	43	19	13	20	24	20	48	35	14	18	44		26.4255
09:30:00	20	14	28	22	7	24	23	22	29	24	35	38	23	27	5	17	54	18	18	18	16	11	32	41	22	15	25	27	11	6	24	24	22	23	44	47	23	19	16	19	35	20	47	46	12	28	39		24.6809
10:00:00	18	9	25	26	18	17	6	22	41	19	32	40	12	14	7	17	40	11	25	10	17	8	35	27	12	17	33	19	6	12	21	29	17	22	36	50	22	15	24	30	31	23	38	19	25	27	34		22.5106
10:30:00	13	10	12	25	8	25	17	12	37	37	29	36	11	14	13	13	48	31	12	22	18	15	40	31	8	17	27	11	6	6	23	27	18	30	29	37	19	21	17	30	33	21	37	25	17	18	38		22.2128
11:00:00	15	14	27	22	5	22	10	16	14	18	28	26	12	9	13	8	43	14	17	28	13	8	32	14	11	24	24	17	9	15	19	26	14	16	16	45	11	17	21	32	38	28	39	33	17	17	36		20.2766
11:30:00	12	10	13	22	14	28	14	12	16	18	15	16	9	12	7	8	42	7	13	16	11	4	29	15	7	15	18	11	6	6	16	29	17	25	22	29	12	17	32	30	34	21	37	28	15	15	29		17.7447
12:00:00	13	8	16	19	6	24	13	6	12	18	17	20	10	14	6	6	19	17	10	19	9	11	35	16	11	18	8	16	5	4	13	19	16	14	16	24	16	25	21	28	23	20	25	28	19	15	21		15.9362
12:30:00	7	7	9	16	1	16	9	10	14	11	10	8	9	7	8	10	13	6	5	8	14	7	28	7	3	10	16	1	8	8	13	11	10	6	12	24	23	13	13	33	19	14	59	20	16	17	24		13.0426
13:00:00	9	10	6	23	13	22	15	17	10	14	7	9	9	13	6	8	30	10	8	4	7	18	21	9	6	15	17	17	0	4	11	19	9	12	12	22	14	21	28	27	48	21	13	16	12	11	7		14.0426
13:30:00	4	6	14	11	4	15	12	20	10	5	8	10	6	13	12	10	30	31	6	12	10	5	22	35	0	4	6	0	8	2	11	24	10	19	19	29	20	8	14	25	22	11	32	33	24	9	11		13.8723
14:00:00	6	8	5	26	8	15	11	4	5	8	2	7	1	10	4	8	0	14	2	0	9	10	9	9	6	23	20	0	0	0	7	14	15	4	18	14	3	34	13	18	19	3	8	16	12	11	18		9.7234
14:30:00	2	4	6	14	2	12	0	11	3	3	3	7	6	18	4	6	8	6	4	12	4	11	6	0	4	12	5	0	0	0	2	16	14	21	20	31	9	10	3	17	41	0	19	27	7	1	9		8.93617
15:00:00	7	4	1	8	2	11	13	31	12	13	4	7	0	6	10	13	0	4	11	0	11	8	8	22	2	13	18	1	0	13	11	0	17	0	20	14	25	5	29	7	13	26	0	13	2	22	5		9.82979
15:30:00	3	12	0	8	2	1	13	4	9	14	4	0	3	14	6	6	0	5	0	0	2	12	5	1	2	8	6	16	0	0	2	0	4	0	0	4	12	22	8	11	20	6	0	1	2	4	0		5.3617
16:00:00	0	0	11	11	0	12	11	9	5	0	0	0	0	6	9	9	0	7	0	0	7	8	2	0	0	5	19	15	0	0	0	0	1	0	2	13	0	0	19	1	7	0	11	37	3	13	0		5.38298
16:30:00	11	10	41	29	6	13	17	17	32	29	0	37	19	19	2	25	73	14	14	0	13	16	55	47	17	17	30	44	25	8	0	0	0	0	9	0	0	0	2	0	18	0	0	5	1	4	0		15.2979
17:00:00	0	0	0	9	0	15	2	2	0	0	0	0	0	7	5	5	25	14	0	0	0	8	4	16	0	0	0	0	0	0	0	0	2	0	10	0	0	0	0	3	0	0	0	6	0	2	0		2.87234
17:30:00	21	6	32	27	13	19	30	21	8	23	0	28	23	14	3	23	29	5	4	0	13	0	21	29	17	2	22	32	10	9	0	3	12	25	34	40	41	34	28	20	34	0	0	15	10	27	14		17.4681
18:00:00	10	2	29	16	0	6	27	0	4	11	0	10	1	3	2	15	11	6	0	0	0	10	7	26	0	0	8	4	0	0	0	0	0	25	22	13	5	0	7	6	21	0	48	41	5	7	3		8.74468
18:30:00	0	6	23	19	4	11	4	0	8	13	0	2	5	20	13	10	12	17	0	0	17	20	14	44	12	0	19	0	0	8	0	2	0	0	12	5	25	16	19	4	27	0	58	30	11	10	14		11.3617
19:00:00	21	4	24	12	2	4	23	12	21	17	10	14	2	2	16	20	15	16	7	2	12	6	7	7	9	0	5	27	0	0	0	23	13	6	17	15	20	6	0	26	19	13	21	32	6	28	13		12.234
19:30:00	9	12	15	13	5	18	22	16	8	18	12	16	7	15	10	14	24	16	19	9	8	7	15	33	8	0	25	16	20	4	7	13	16	4	20	28	36	3	4	22	29	26	31	29	21	41	18		16.2128
20:00:00	15	8	18	29	8	12	14	15	21	20	20	22	15	17	11	12	35	15	10	39	12	18	12	17	12	25	28	23	6	0	21	32	4	32	22	26	28	19	29	32	34	24	40	33	26	41	21		20.7021
20:30:00	31	28	37	53	37	66	46	34	42	45	33	63	46	32	41	29	74	31	33	32	104	49	56	45	15	34	49	44	41	36	42	35	41	40	34	53	44	24	24	58	53	41	59	44	46	48	40		43.234
21:00:00	12	1	8	29	22	16	39	15	16	19	12	21	20	23	21	20	72	33	36	50	83	19	35	21	22	14	35	20	27	18	36	35	47	42	31	63	45	34	32	40	64	35	42	40	54	55	32		32.0426
21:30:00	19	21	19	13	10	6	0	33	3	6	13	0	10	4	24	13	31	6	19	20	23	27	33	12	6	5	19	3	11	18	19	50	42	37	26	35	34	26	24	48	50	38	46	32	48	54	29		22.6596
22:00:00	10	0	8	18	4	0	4	16	0	48	18	0	8	0	15	26	32	22	13	44	31	126	9	7	0	0	13	41	23	13	22	40	22	12	12	21	46	18	21	20	17	15	30	17	23	32	29		20.1277
22:30:00	0	0	0	8	0	0	7	11	0	0	6	0	0	0	25	16	18	49	0	8	0	13	3	29	0	0	3	1	0	39	2	20	5	0	0	0	40	0	0	0	0	0	47	0	0	24	0		7.95745
23:00:00	19	0	0	0	0	3	0	22	0	32	8	0	0	0	0	0	44	62	10	5	0	25	0	0	0	2	0	25	20	17	0	15	12	0	0	0	10	21	0	0	0	0	10	0	0	5	0		7.80851
23:30:00	0	0	0	31	0	0	9	0	26	9	0	0	0	20	0	0	0	26	3	0	0	12	0	0	12	21	47	3	0	17	14	1	0	0	0	0	6	5	0	0	0	0	25	0	0	0	0		6.10638
00:00:00	0	10	0	31	0	14	4	0	2	0	0	0	0	43	0	28	23	30	26	46	24	2	0	0	34	7	0	1	0	0	20	0	19	0	0	1	23	20	25	0	0	0	0	0	0	15	0		9.53191
00:30:00	0	0	0	14	0	1	6	0	31	49	8	0	0	27	0	18	36	0	2	0	19	0	2	0	35	0	0	3	1	3	1	0	0	0	0	0	13	11	0	0	0	0	0	0	0	2	0		6
01:00:00	0	0	4	14	0	26	0	0	22	5	0	36	0	0	0	0	24	0	0	0	16	0	1	0	13	48	25	0	2	0	0	0	0	0	0	0	17	9	36	0	0	8	43	0	0	2	0		7.46809
01:30:00	0	6	20	39	36	0	0	0	31	0	3	9	8	17	0	0	0	52	2	26	0	11	13	5	24	7	8	0	0	1	0	16	0	0	0	0	20	15	0	0	0	10	1	0	0	13	0		8.3617
02:00:00	0	0	0	6	10	19	0	0	0	0	0	0	0	11	0	0	0	2	0	14	30	0	0	40	20	0	0	5	34	5	0	0	20	0	0	0	24	0	16	0	0	0	39	0	0	3	0		6.34043
02:30:00	0	0	8	12	0	25	0	0	0	8	0	0	0	3	0	0	0	0	0	0	28	13	17	0	0	0	0	4	7	0	0	0	0	0	28	0	10	0	0	0	0	0	0	0	0	9	0		3.65957
03:00:00	0	28	17	0	0	46	0	0	0	29	7	0	0	0	0	15	0	19	0	0	0	3	0	0	23	0	21	37	0	5	0	0	0	11	0	0	19	40	32	0	0	0	0	0	0	12	0		7.74468
03:30:00	0	0	20	0	0	6	0	0	31	0	18	0	0	0	0	21	0	2	0	0	40	0	0	0	42	0	15	43	0	0	0	0	0	15	0	44	12	15	0	0	59	0	20	0	0	12	0		8.82979
04:00:00	0	9	0	21	0	14	0	28	0	0	0	0	0	0	0	0	66	5	0	0	0	0	0	0	0	0	21	4	0	69	0	17	0	0	34	10	1	12	3	21	12	0	0	22	0	0	0		7.85106
04:30:00	0	5	0	11	30	0	0	19	0	17	0	29	0	27	0	0	0	0	0	0	4	0	6	0	27	0	0	0	0	0	0	37	0	12	34	2	39	18	0	44	36	0	0	25	0	0	0		8.97872
05:00:00	0	0	0	8	9	3	0	1	0	22	0	25	0	19	9	0	0	42	0	0	22	0	0	0	7	0	0	19	0	0	0	25	0	3	38	37	29	31	15	0	79	0	0	0	56	0	0		10.617
05:30:00	38	0	0	0	0	23	0	0	0	0	0	0	0	16	23	0	0	0	11	0	0	23	0	0	0	0	0	22	0	0	0	1	0	0	25	0	12	0	26	0	11	0	0	0	21	0	0		5.3617
06:00:00	12	22	14	1	0	12	0	0	0	0	0	24	0	0	0	0	0	0	27	27	21	17	44	0	0	0	0	0	0	0	26	23	0	6	15	0	22	22	0	0	21	0	0	34	9	14	21		9.23404
06:30:00	0	4	0	29	0	12	0	0	0	0	0	8	12	9	0	25	0	0	0	40	3	0	34	0	0	52	30	0	0	0	0	0	0	34	24	0	13	12	33	0	0	49	8	15	15	35	0		10.5532
07:00:00	0	11	18	27	0	32	42	35	33	26	54	14	37	0	23	0	61	21	10	0	0	41	33	37	56	24	25	0	0	40	33	0	43	0	11	8	60	19	5	0	71	13	33	0	22	34	9		22.5745
07:30:00	4	0	0	0	0	12	12	5	0	0	8	12	5	15	0	0	27	34	0	8	0	5	0	1	0	11	3	0	11	0	4	0	37	28	0	44	39	29	16	45	8	25	0	10	15	40	19		11.3191
08:00:00	11	12	0	42	14	31	19	29	0	0	0	2	34	19	10	18	43	21	0	33	38	38	7	0	0	0	21	28	0	0	17	39	27	3	20	17	39	13	22	35	28	0	25	35	16	17	23		18
[truncated: 284 more columns]

## Sheet: Fig 8 G (HFD LpR1 RNAi)
FED(LpR1 RNAi~PPL)	M23-5.21																M14-5.21																M15-5.21																M23-5.21
20:30:00	33	2	32	54	28	65	46	52	34	66	43	90	45	31	43	31	45	49	34	41	64	38	34	36	18	50	51	80	40	44	49	42	43	31	20	40	43	63	6	47	31	32	29	15	46	24	51	33	47
21:00:00	38	0	44	65	32	74	74	48	30	67	47	66	34	49	45	48	57	52	49	31	57	45	44	27	22	22	34	48	44	36	25	43	57	36	21	32	60	45	0	39	21	42	33	15	24	36	41	41	32
21:30:00	15	2	45	18	10	43	8	26	35	101	34	29	41	41	13	29	39	57	46	25	41	43	39	29	10	30	34	40	49	47	35	28	36	12	22	22	35	62	0	43	19	26	25	7	15	38	34	40	39
22:00:00	10	16	49	0	4	23	5	16	32	9	28	29	18	12	5	7	9	37	30	15	30	42	1	5	17	14	4	17	25	1	6	12	27	11	2	11	10	39	0	27	10	25	12	0	16	24	7	24	12
22:30:00	0	0	1	8	4	0	1	3	0	46	10	0	5	44	0	0	0	0	0	3	0	5	0	0	0	0	0	1	0	0	0	0	6	1	0	0	2	6	0	0	0	1	0	0	0	0	0	0	45
23:00:00	0	6	0	5	8	0	4	1	0	0	1	0	0	0	0	0	4	0	6	0	0	13	0	0	0	0	1	0	0	0	0	0	6	4	0	1	2	0	0	0	18	0	0	0	0	0	1	5	7
23:30:00	0	0	0	0	6	0	36	2	0	0	0	2	18	0	0	3	0	0	43	0	3	4	0	0	0	0	3	1	0	0	0	0	14	0	1	0	1	0	0	0	0	0	0	0	0	0	1	7	0
00:00:00	0	0	0	0	0	5	0	0	0	0	0	1	2	0	0	3	7	0	2	0	0	0	0	0	19	0	5	5	0	0	0	0	0	6	9	1	0	0	0	0	0	0	0	0	0	0	0	0	10
00:30:00	0	0	0	0	4	10	0	1	0	48	0	11	1	0	0	14	0	0	0	0	0	30	0	0	0	0	0	2	0	0	0	0	0	0	6	0	0	0	0	0	0	0	0	0	0	0	0	1	40
01:00:00	1	0	7	0	14	7	0	11	0	0	0	3	3	0	0	1	0	0	0	0	0	0	0	0	0	0	0	0	0	0	0	0	0	0	3	0	0	0	0	0	3	0	0	0	0	0	0	16	0
01:30:00	35	0	0	0	6	30	0	57	0	12	30	50	0	0	0	36	0	0	0	0	0	0	0	0	0	0	1	4	0	0	0	0	0	0	0	0	0	0	0	0	11	0	22	14	0	0	1	0	3
02:00:00	0	30	0	0	9	40	37	0	0	0	0	0	24	0	0	0	0	0	0	0	0	22	24	0	0	0	5	9	0	0	0	0	0	0	26	0	0	0	0	20	0	0	0	0	0	0	43	14	1
02:30:00	0	10	0	0	0	5	21	2	0	0	0	3	4	33	0	8	0	0	0	0	0	2	0	0	0	0	2	0	6	0	0	0	45	0	0	0	0	0	0	49	6	0	0	0	0	0	0	0	48
03:00:00	0	0	0	0	10	3	2	13	0	0	19	34	0	4	0	0	0	11	0	0	3	14	0	0	0	0	43	20	0	0	0	0	3	0	0	0	0	0	0	10	0	0	0	29	0	0	0	0	4
03:30:00	0	0	10	26	4	19	0	1	0	27	16	17	0	0	0	27	0	20	0	37	0	0	22	0	0	0	0	0	0	0	0	0	0	0	0	0	0	0	0	0	0	0	0	0	0	0	0	12	0
04:00:00	0	0	4	41	19	2	0	7	0	29	0	0	0	0	0	3	0	3	0	0	0	0	3	0	0	0	0	0	0	0	11	0	0	22	0	0	0	0	0	4	0	0	0	0	0	0	36	6	40
04:30:00	0	0	0	0	5	0	0	9	0	0	0	0	0	0	0	1	0	2	0	0	0	20	0	0	0	0	0	47	0	0	25	0	0	5	0	0	0	0	0	12	9	0	0	0	0	29	0	0	18
05:00:00	41	0	9	0	1	4	0	4	12	5	0	0	6	20	0	14	0	0	16	0	3	24	0	0	0	0	17	2	0	0	0	0	38	0	0	0	0	80	0	0	10	0	0	0	0	40	20	0	0
05:30:00	2	0	1	0	0	0	5	52	32	0	0	0	26	0	0	3	0	0	15	0	0	7	0	0	10	0	0	0	0	0	0	29	10	0	0	0	0	37	23	7	0	0	0	0	0	3	3	25	0
06:00:00	11	0	0	0	0	5	26	16	3	0	0	0	0	0	1	8	0	4	9	0	0	0	0	0	0	0	0	0	0	34	0	18	0	0	0	5	31	0	14	0	0	41	0	0	0	1	0	0	27
06:30:00	0	0	30	21	14	38	3	0	3	26	9	0	0	0	0	11	0	0	10	0	0	36	0	0	0	0	0	0	0	16	0	0	8	24	0	51	8	0	64	6	0	25	0	0	5	0	0	11	0
07:00:00	0	16	24	64	10	49	36	0	24	10	24	70	30	43	42	40	30	32	17	22	17	17	0	30	0	34	18	42	0	9	17	0	40	10	0	0	0	0	0	49	19	13	19	41	31	1	35	12	52
07:30:00	0	0	26	0	0	7	1	0	0	10	0	18	3	5	26	11	27	0	0	0	48	0	0	2	0	0	0	22	0	0	0	0	0	0	19	0	29	0	22	8	0	6	21	14	0	5	14	0	0
08:00:00	0	9	20	0	9	11	0	25	13	0	0	35	14	0	0	29	0	0	19	0	5	14	22	0	0	0	0	7	50	0	10	0	5	4	2	4	0	0	0	0	4	0	0	0	0	8	18	0	31
08:30:00	60	36	45	48	35	80	42	44	34	48	37	36	36	20	52	38	32	31	28	54	63	51	47	32	7	28	27	89	33	28	24	37	59	27	36	55	52	74	30	43	22	47	37	43	20	51	53	30	32
09:00:00	38	11	22	21	23	64	64	42	36	34	21	46	41	21	25	10	33	64	30	37	33	34	30	22	6	30	17	27	13	17	22	19	38	10	40	41	26	56	5	27	27	58	32	16	6	30	51	26	23
09:30:00	13	18	19	23	21	62	47	51	35	60	16	25	10	22	13	27	31	48	20	16	21	33	17	32	2	26	8	33	10	14	12	2	43	7	37	32	26	54	0	25	17	40	28	12	11	19	45	25	21
10:00:00	6	4	15	22	18	36	43	61	18	38	14	16	21	31	16	17	32	47	10	27	31	41	7	23	0	33	9	26	17	10	0	14	24	4	26	30	26	53	0	20	21	18	26	12	7	30	52	26	19
10:30:00	23	12	9	16	18	43	46	41	21	25	13	17	8	19	29	17	27	37	10	13	24	36	6	29	9	28	6	50	14	11	10	0	19	6	20	34	29	56	71	20	17	29	19	6	11	12	44	33	17
11:00:00	20	7	14	9	30	28	36	53	23	33	8	28	14	15	2	17	24	36	9	25	8	39	10	27	6	17	23	35	22	8	2	14	36	10	40	31	17	42	13	18	13	34	19	21	4	48	42	19	18
11:30:00	17	4	8	10	12	29	35	52	16	27	0	26	9	11	11	20	20	38	4	25	25	43	6	21	0	17	10	26	12	8	0	0	20	4	17	28	20	34	11	24	20	16	14	12	0	15	47	28	10
12:00:00	12	32	7	12	31	26	24	40	4	17	0	12	15	12	0	12	18	16	8	6	28	47	6	15	5	27	0	24	21	12	5	9	11	4	15	22	18	54	9	22	11	23	21	6	10	23	34	20	22
12:30:00	8	4	0	0	11	43	31	26	11	28	0	34	4	15	2	2	37	23	9	22	23	36	0	10	0	32	10	20	13	0	0	8	32	3	58	32	16	26	0	7	31	21	15	5	0	4	24	14	13
13:00:00	9	8	1	0	15	35	29	42	24	30	0	18	16	19	0	15	16	22	5	7	19	28	4	6	6	9	0	15	25	0	10	0	19	6	27	17	25	33	7	11	15	15	17	9	0	25	26	14	6
13:30:00	7	23	9	6	17	38	20	68	7	12	29	11	11	21	0	13	4	7	13	15	22	33	1	7	3	13	16	23	4	8	0	17	19	4	14	19	18	19	7	26	14	14	10	16	2	2	28	14	13
14:00:00	28	0	0	4	14	23	15	34	3	30	0	3	30	23	0	22	0	2	6	26	8	24	0	0	4	1	0	21	18	2	2	6	13	0	16	18	16	21	7	17	20	19	0	7	17	26	21	11	6
14:30:00	24	0	8	0	16	13	0	24	2	6	0	1	16	12	0	11	0	0	19	3	23	31	0	0	0	24	8	7	4	0	2	0	20	6	11	14	5	1	7	15	6	30	13	10	2	0	5	15	10
15:00:00	11	0	0	17	15	32	24	24	13	19	0	17	16	5	0	6	0	0	0	0	13	23	0	0	0	16	0	6	0	0	4	0	0	0	11	13	17	21	215	9	10	11	18	0	10	13	7	21	2
15:30:00	0	0	0	8	9	15	14	6	8	19	0	8	16	21	2	8	0	0	0	0	10	30	17	0	0	1	14	7	0	0	11	0	6	0	10	17	0	0	17	8	8	26	0	6	0	23	0	21	0
16:00:00	25	0	0	11	11	0	7	44	0	14	0	0	18	37	0	7	0	5	0	0	3	15	0	0	0	13	0	8	31	0	0	0	25	8	22	21	24	0	97	7	12	11	0	6	2	26	15	15	11
16:30:00	16	7	0	0	5	0	8	9	0	18	0	2	6	13	0	10	0	0	0	0	19	15	0	0	0	7	0	0	54	0	0	0	3	0	13	13	15	1	24	12	14	7	0	2	4	0	9	9	0
17:00:00	10	2	0	3	15	0	2	16	0	15	0	42	0	2	0	3	0	0	0	42	2	18	2	0	0	12	0	0	24	0	9	0	0	2	0	19	0	57	11	10	9	0	0	0	0	25	0	13	0
17:30:00	3	10	0	6	7	35	42	12	14	23	0	15	0	17	0	3	27	2	29	13	15	6	8	0	0	8	0	1	14	0	0	3	29	1	17	8	0	20	34	8	9	0	28	12	0	1	10	19	0
18:00:00	15	0	11	19	12	36	42	36	33	40	0	15	17	34	0	13	29	25	44	34	16	32	1	29	16	24	29	37	13	23	0	40	35	5	63	58	27	34	88	15	17	43	27	0	0	28	7	31	14
18:30:00	6	0	0	0	8	18	0	27	5	9	0	0	24	15	7	8	16	19	17	0	1	24	7	11	0	35	21	8	15	11	4	11	24	0	14	31	20	46	56	11	19	17	0	0	0	23	21	30	18
19:00:00	8	10	0	9	15	27	32	31	9	30	0	23	9	7	7	19	17	20	19	38	30	21	2	15	1	25	10	14	20	9	3	14	17	0	24	24	19	10	16	19	18	25	24	13	0	0	4	17	9
19:30:00	20	1	29	12	12	31	67	43	17	51	22	21	4	22	14	27	27	12	19	22	23	30	0	13	9	28	0	29	29	21	3	22	41	8	21	27	34	29	9	20	20	22	21	12	10	34	15	15	20
20:00:00	8	6	6	6	12	28	42	46	14	54	15	18	25	23	9	17	35	38	9	19	21	32	16	29	4	33	14	21	15	14	4	20	35	10	24	35	37	42	23	28	21	18	21	9	2	15	28	26	19
20:30:00	31	9	30	45	31	58	53	49	49	52	37	37	40	49	46	20	44	52	43	30	36	55	39	38	28	37	35	41	28	30	40	44	52	17	22	46	45	65	33	36	37	68	36	45	22	53	64	41	46
21:00:00	39	2	7	28	13	12	16	16	1	50	12	13	27	39	24	7	29	26	26	3	25	46	24	4	1	35	3	1	109	3	11	35	63	2	2	20	55	55	16	21	15	49	43	20	8	37	43	36	27
21:30:00	8	0	0	0	5	0	0	3	0	13	2	3	14	15	0	8	11	16	15	21	0	27	2	0	0	15	0	0	0	0	19	2	25	0	4	31	40	31	0	20	14	28	26	18	0	23	10	28	2
22:00:00	11	0	0	0	1	14	0	4	0	7	0	10	4	0	0	0	0	0	2	0	0	34	0	0	0	0	0	0	0	0	0	1	1	0	1	0	27	4	0	13	6	7	11	0	0	22	0	15	0
22:30:00	0	0	12	0	0	0	0	0	14	0	9	0	0	0	0	0	0	9	0	18	0	15	0	0	0	0	0	0	0	0	0	0	0	0	0	0	16	0	0	0	47	0	0	7	0	37	0	5	0
23:00:00	0	0	0	0	7	31	0	0	0	0	0	41	17	0	0	0	0	11	27	17	0	0	0	0	0	0	0	0	0	0	28	5	0	0	9	0	0	0	0	44	0	0	0	0	0	0	0	9	0
23:30:00	0	0	21	7	3	4	0	32	0	0	0	0	0	2	0	15	3	0	21	0	0	39	0	0	0	0	0	0	11	0	0	3	0	0	0	23	0	0	10	1	0	0	0	12	0	2	0	15	0
00:00:00	29	0	8	0	6	49	0	1	3	0	28	26	9	0	0	20	0	0	57	0	0	27	0	0	0	0	40	0	0	0	0	7	35	0	1	0	0	0	0	0	23	0	0	13	0	2	6	2	0
00:30:00	0	0	0	0	0	33	0	0	20	0	34	13	5	0	0	16	0	0	14	0	0	0	0	0	0	0	0	33	0	0	0	1	0	0	24	26	0	0	3	0	10	0	0	0	0	0	0	2	0
01:00:00	0	45	0	0	11	18	0	57	0	24	16	19	8	0	5	0	0	0	15	0	17	43	20	0	0	0	0	41	12	0	0	0	27	0	1	20	0	0	17	0	0	0	0	19	0	15	30	37	0
01:30:00	0	0	0	32	0	0	0	3	0	33	0	0	0	0	11	14	0	0	15	0	0	41	10	0	0	0	0	7	5	0	0	4	0	0	1	14	79	0	0	8	18	0	0	7	0	0	25	18	0
02:00:00	0	0	0	22	19	0	0	0	0	0	2	5	24	17	3	2	0	0	31	0	4	2	0	0	0	0	0	0	0	0	0	26	13	0	42	0	27	0	8	0	11	0	0	0	0	0	0	7	0
02:30:00	24	0	14	0	0	5	19	0	0	34	16	0	2	9	26	0	0	0	27	54	0	27	19	0	35	27	0	0	1	0	2	17	0	0	6	0	0	0	5	0	0	0	0	0	0	5	0	20	29
03:00:00	8	0	0	0	12	0	8	0	0	0	0	0	0	0	3	0	0	0	13	7	0	5	0	0	0	34	0	0	0	0	60	2	0	0	0	0	9	0	9	9	0	0	16	27	13	0	0	15	0
03:30:00	0	39	0	0	4	28	0	28	0	46	28	0	16	0	0	0	0	0	22	0	25	1	0	0	0	8	0	4	1	0	0	1	0	0	0	0	5	85	0	0	0	0	5	0	4	20	0	25	6
04:00:00	0	0	0	0	0	0	0	15	0	9	42	0	18	22	42	0	0	0	13	2	0	28	0	0	13	0	27	0	9	0	0	8	30	0	0	0	0	39	25	4	0	0	2	20	0	61	16	10	0
04:30:00	0	8	0	0	22	0	0	0	0	0	0	0	0	4	23	0	0	0	0	30	0	33	0	0	0	0	0	0	1	0	0	0	20	9	0	33	0	9	0	42	14	0	0	0	0	16	0	37	0
05:00:00	21	0	22	0	0	0	0	0	30	0	3	0	0	6	0	15	0	0	13	13	0	9	0	20	0	0	0	0	0	0	0	28	0	0	0	5	0	39	0	0	6	0	0	1	0	30	0	7	0
05:30:00	0	0	47	29	0	32	0	0	5	0	57	0	24	19	0	9	43	44	1	2	0	43	0	0	0	0	0	0	0	0	81	20	0	0	0	0	0	0	0	18	0	0	0	0	0	1	0	19	0
06:00:00	0	0	0	0	0	18	0	26	11	1	28	0	0	0	0	0	0	2	0	0	0	12	17	0	17	0	0	36	2	0	20	0	17	0	0	0	49	0	0	0	0	26	0	0	0	13	0	0	52
06:30:00	0	0	0	0	24	0	53	0	0	54	0	0	26	34	55	21	27	0	9	0	5	26	6	0	0	0	0	9	0	23	0	0	0	0	0	0	4	0	18	27	0	31	27	0	0	0	0	14	0
07:00:00	0	0	0	0	0	42	34	0	15	3	32	38	0	10	0	0	0	0	28	7	0	2	0	0	0	0	14	0	79	0	13	0	2	0	0	0	0	0	0	32	0	18	0	0	0	0	41	31	0
07:30:00	28	0	0	6	0	24	0	0	0	22	4	43	0	12	0	0	0	0	0	0	0	15	0	0	0	0	0	0	0	0	8	0	0	0	0	53	30	60	14	0	0	30	45	24	30	53	67	25	9
08:00:00	0	0	34	0	0	0	0	20	16	31	0	21	24	65	0	10	35	15	10	0	0	0	0	17	0	18	0	0	0	0	0	0	0	5	18	12	0	0	0	0	0	5	0	0	0	4	0	0	6
[truncated: 276 more columns]
