# Supplementary figures and images for: High-fat diet enhances starvation-induced hyperactivity via sensitizing hunger-sensing neurons in Drosophila
Source: eLife journal article supplement (doi:10.7554/elife.53103), 2020-04-23

Figure 1 – figure supplement 1

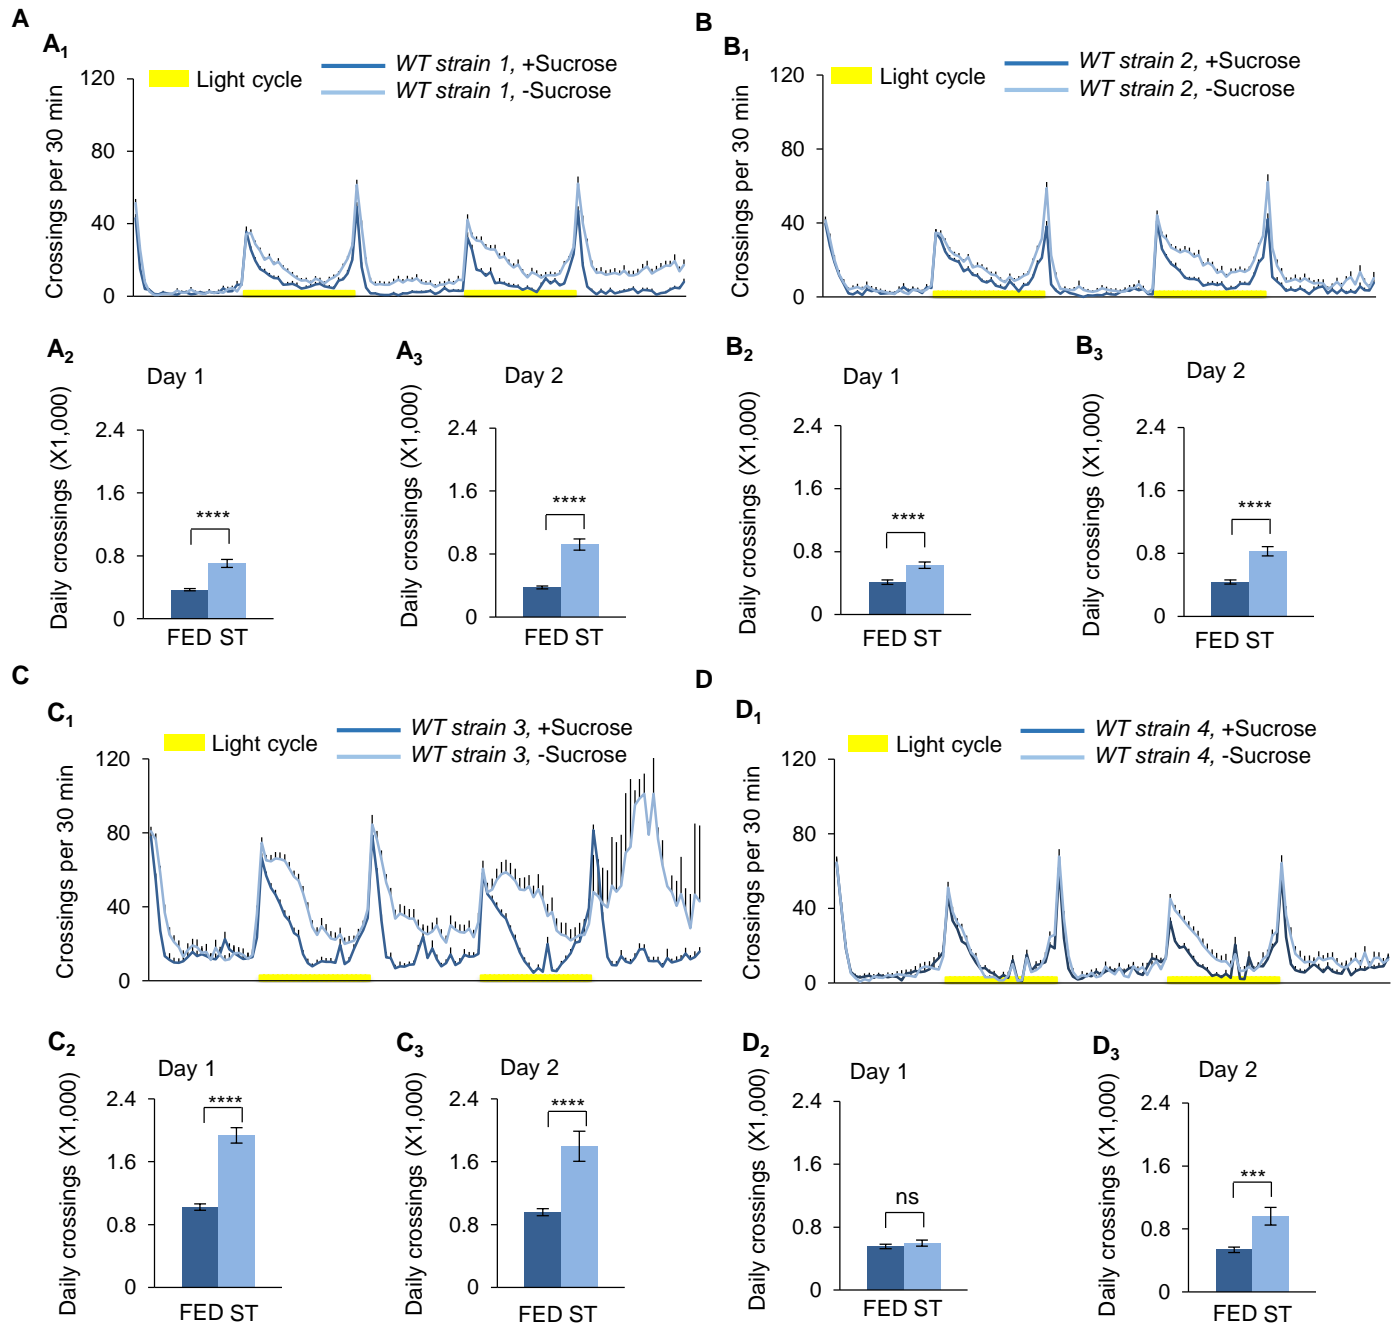

Supplement: supp [file elife-53103-supp-v1.zip › elife_poa_e53103_Figure_1_figure_supplement_1.pdf]

**Figure 1 – figure supplement 2**

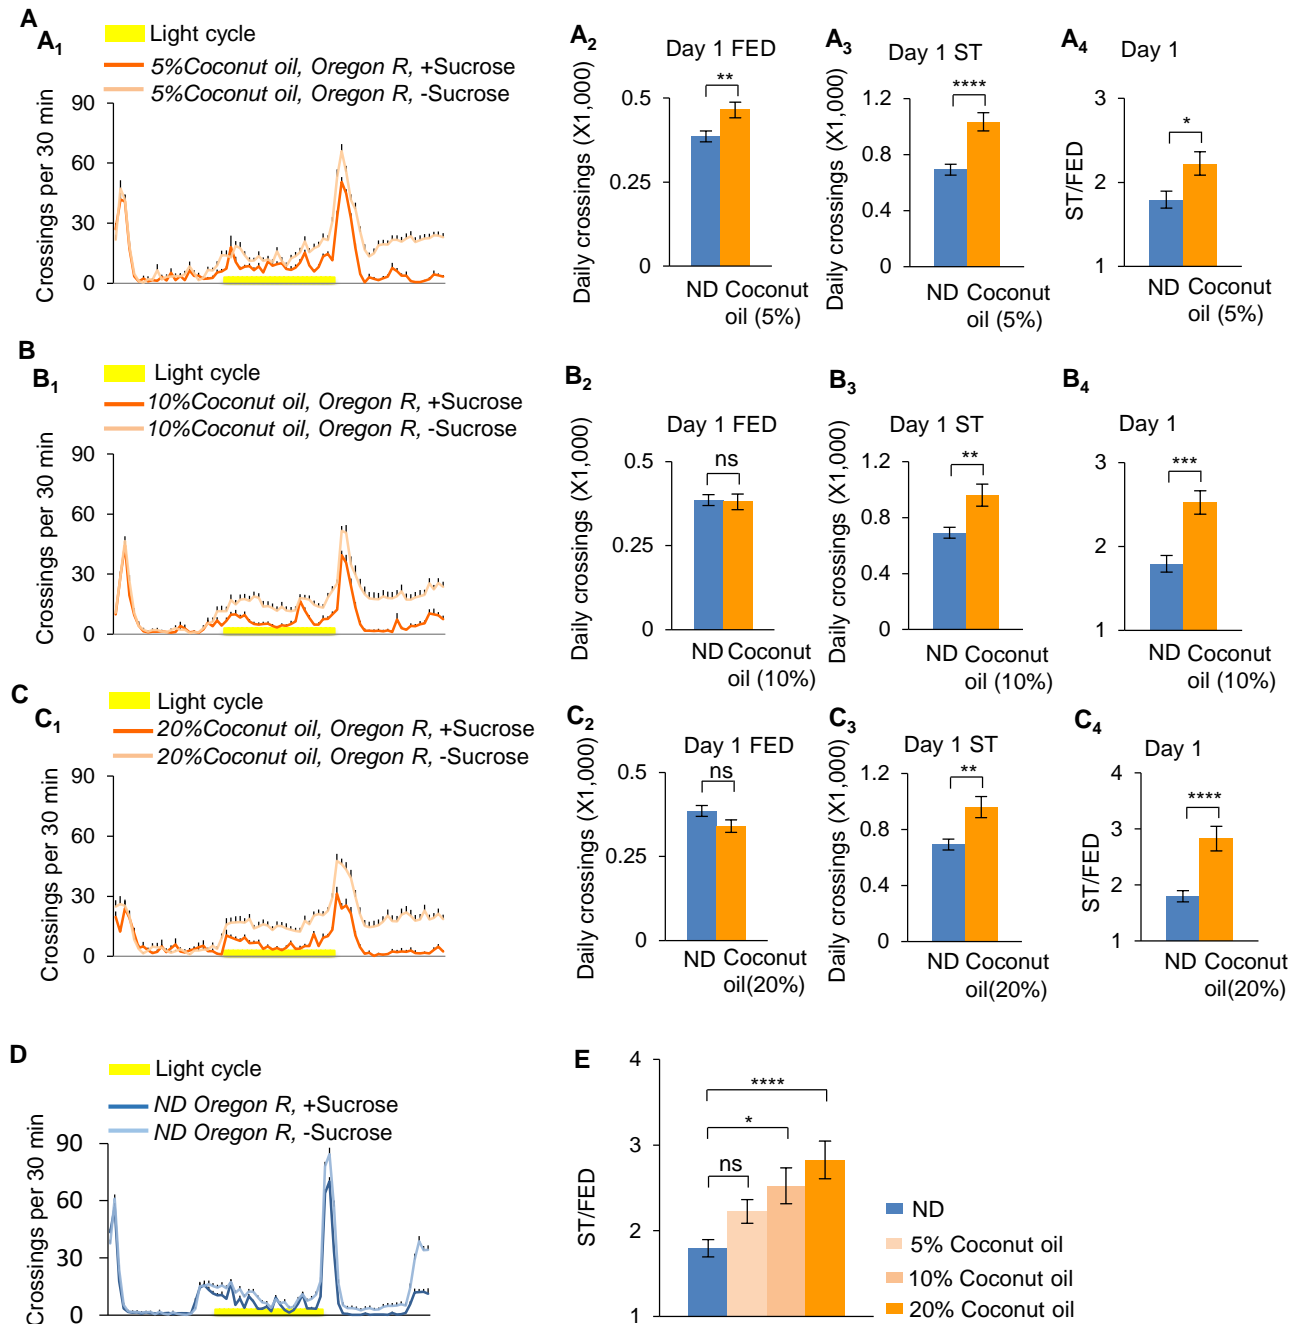

Supplement: supp [file elife-53103-supp-v1.zip › elife_poa_e53103_Figure_1_figure_supplement_2.pdf]

**Figure 1 – figure supplement 3**

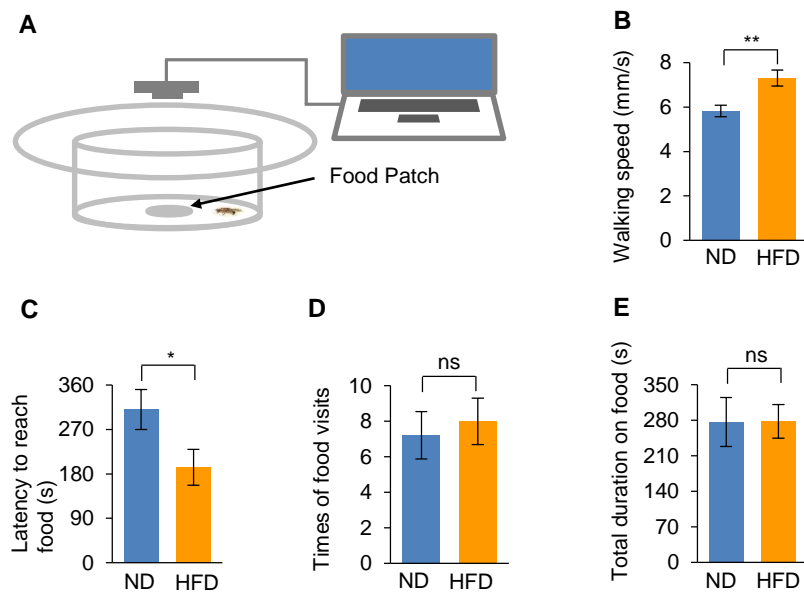

Supplement: supp [file elife-53103-supp-v1.zip › elife_poa_e53103_Figure_1_figure_supplement_3.pdf]

Figure 1 – figure supplement 4

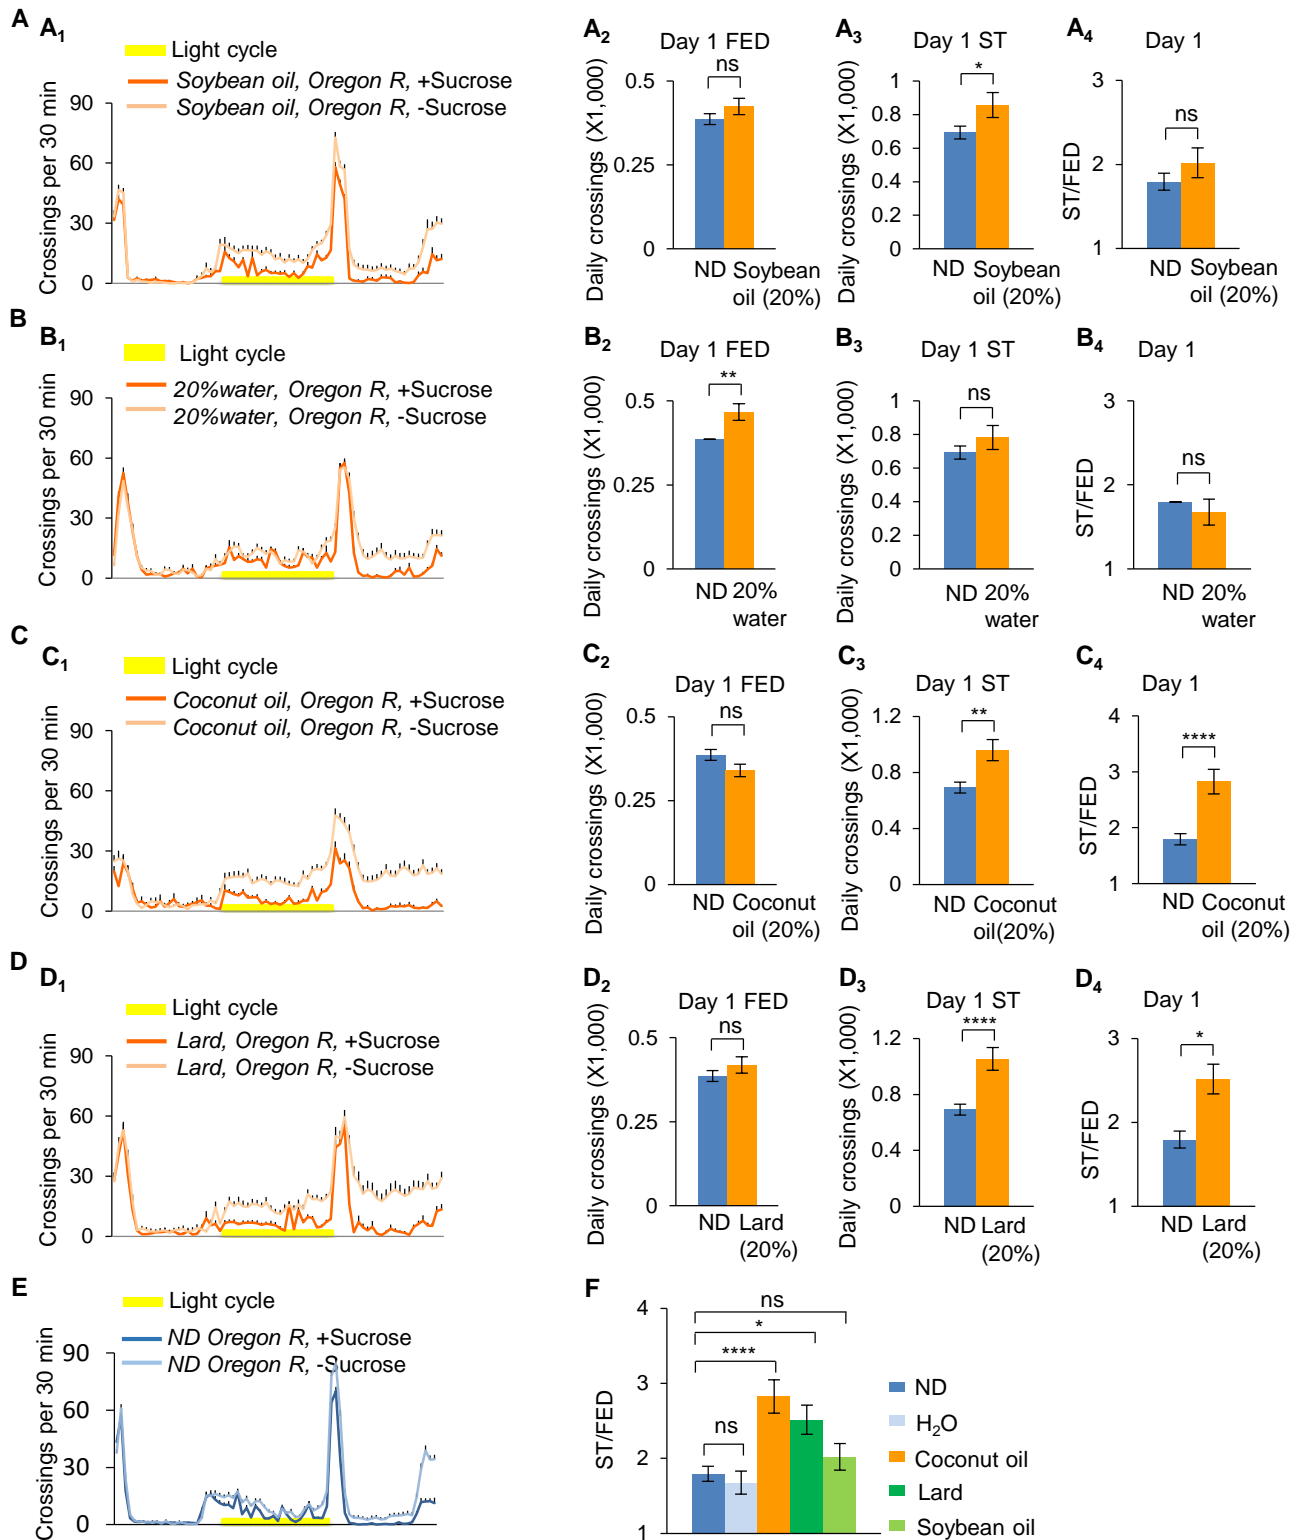

Supplement: supp [file elife-53103-supp-v1.zip › elife_poa_e53103_Figure_1_figure_supplement_4.pdf]

Figure 1 – figure supplement 5

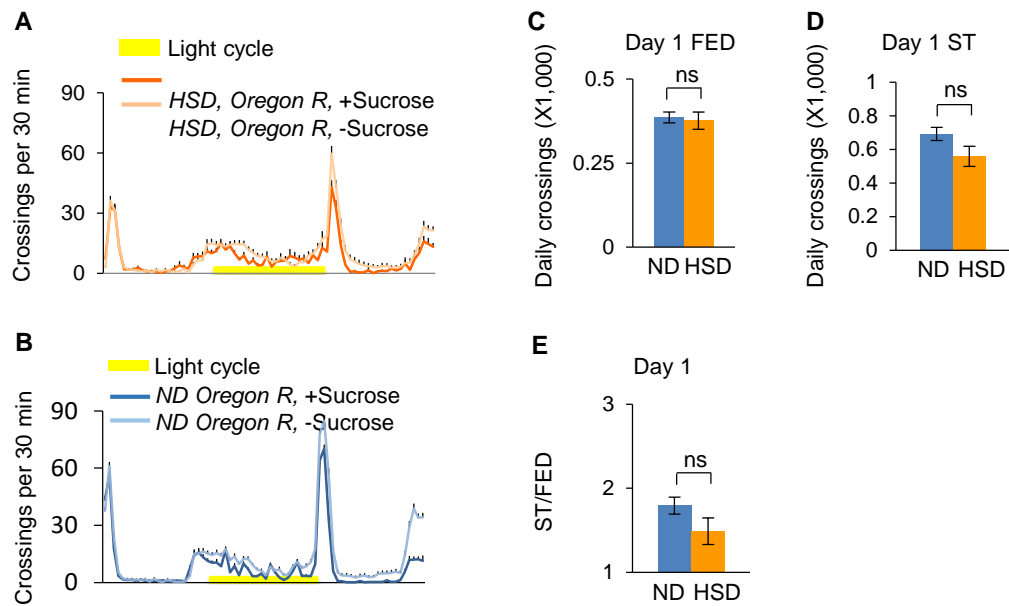

Supplement: supp [file elife-53103-supp-v1.zip › elife_poa_e53103_Figure_1_figure_supplement_5.pdf]

Figure 2 – figure supplement 1

**A**

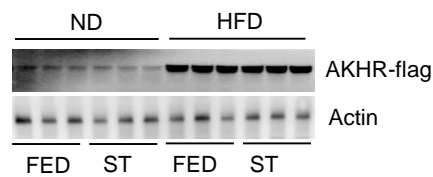

**B**

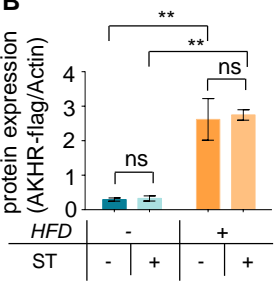

Supplement: supp [file elife-53103-supp-v1.zip › elife_poa_e53103_Figure_2_figure_supplement_1.pdf]

Figure 4 – figure supplement 1

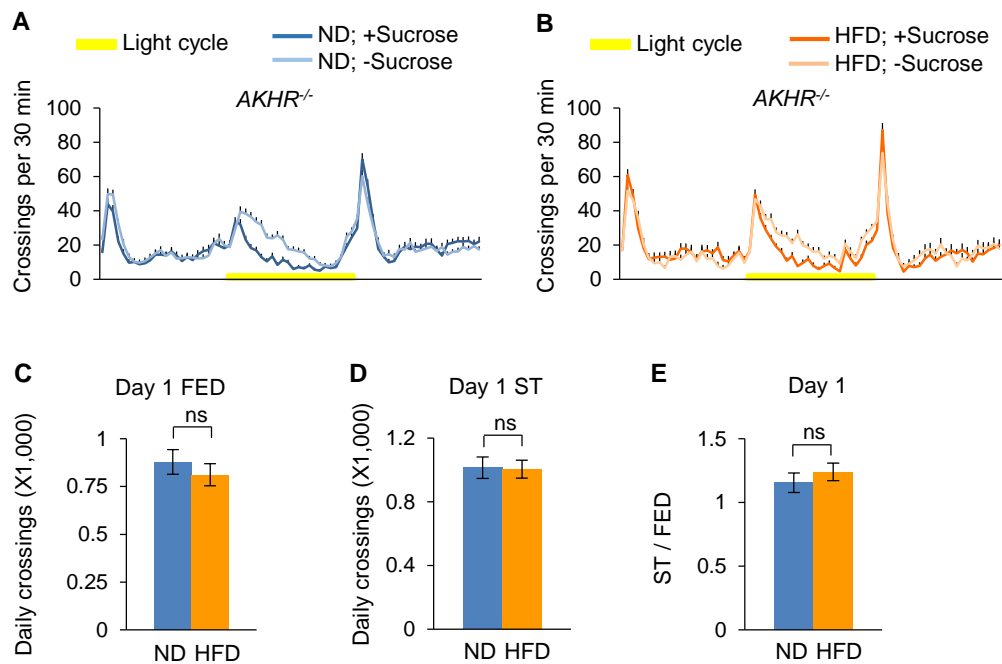

Supplement: supp [file elife-53103-supp-v1.zip › elife_poa_e53103_Figure_4_figure_supplement_1.pdf]

**Figure 4 – figure supplement 2**

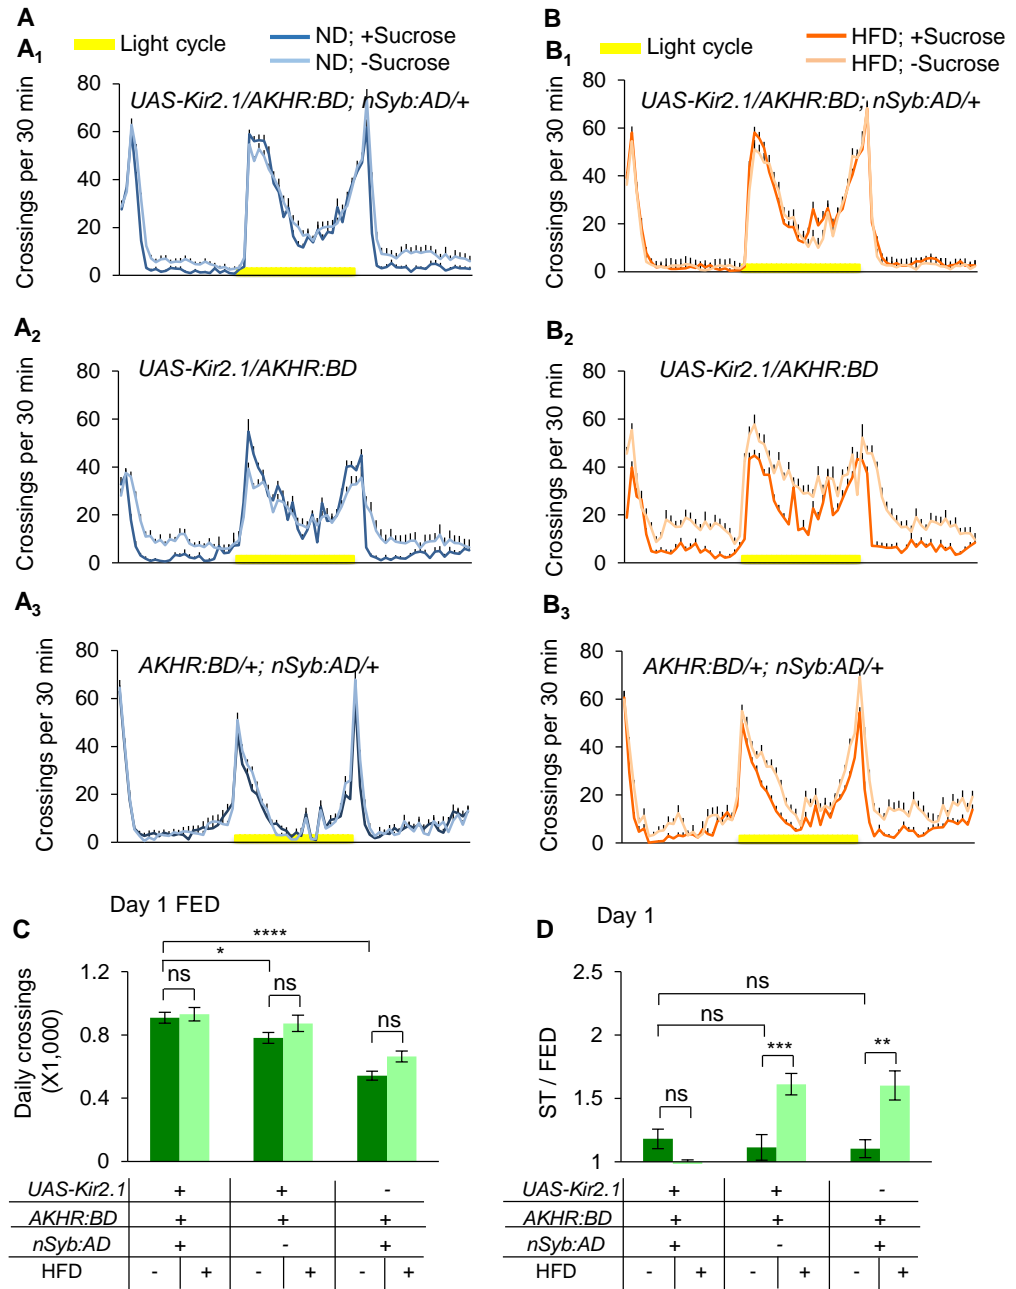

Supplement: supp [file elife-53103-supp-v1.zip › elife_poa_e53103_Figure_4_figure_supplement_2.pdf]

**Figure 4 – figure supplement 3**

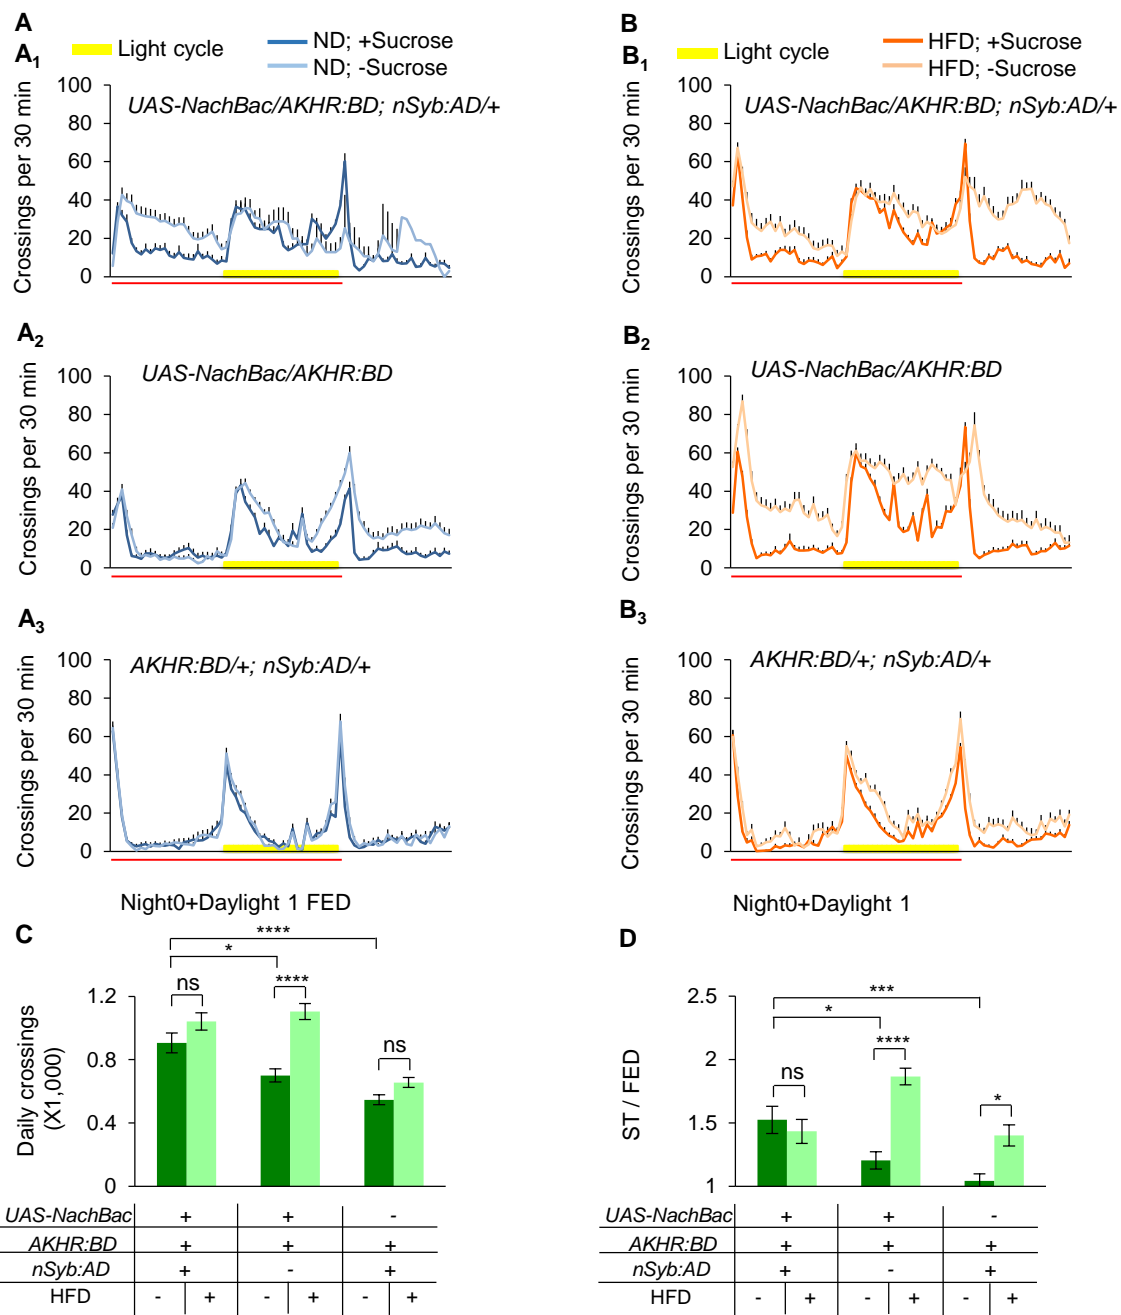

Supplement: supp [file elife-53103-supp-v1.zip › elife_poa_e53103_Figure_4_figure_supplement_3.pdf]

Figure 4 – figure supplement 4

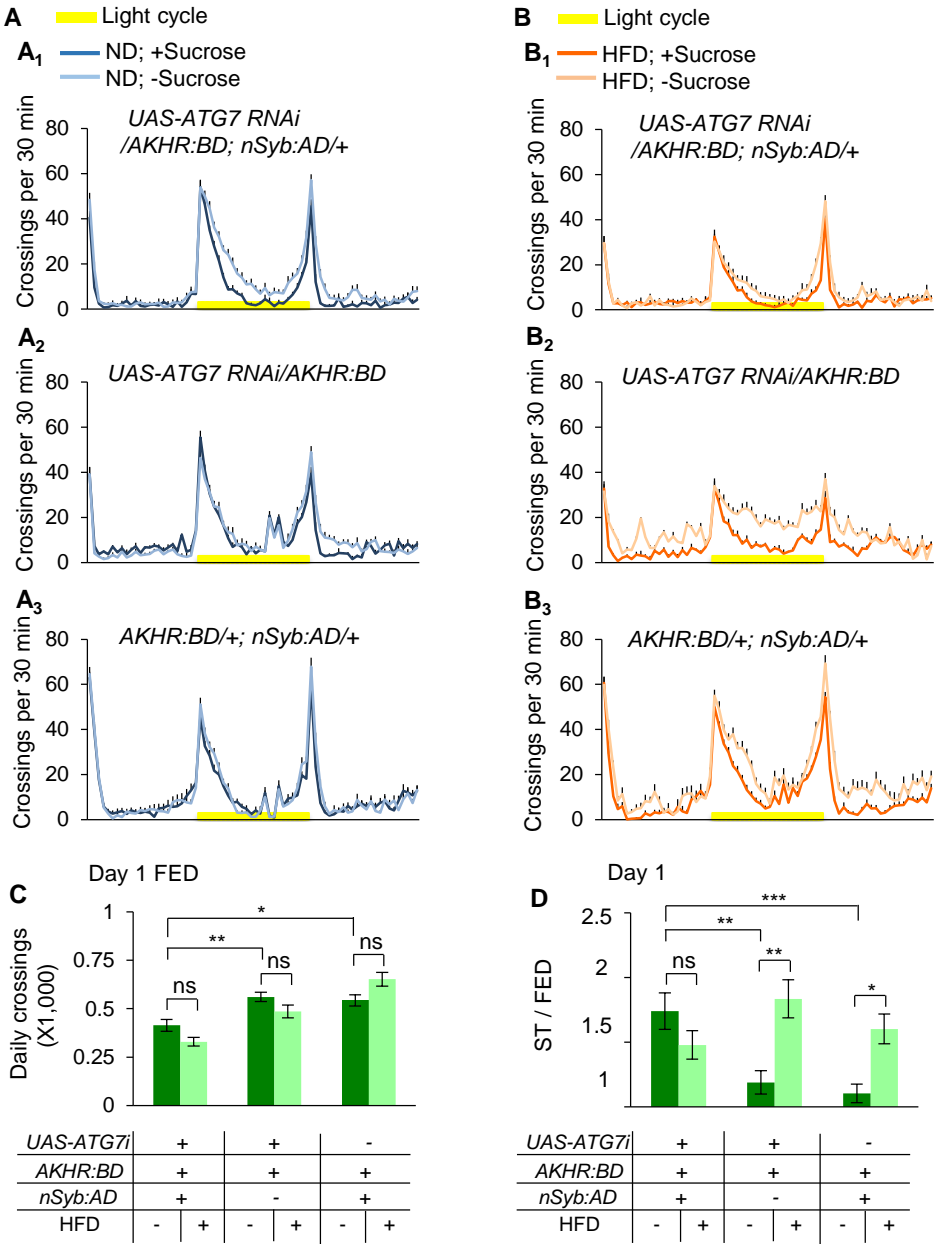

Supplement: supp [file elife-53103-supp-v1.zip › elife_poa_e53103_Figure_4_figure_supplement_4.pdf]

Figure 5 – figure supplement 3

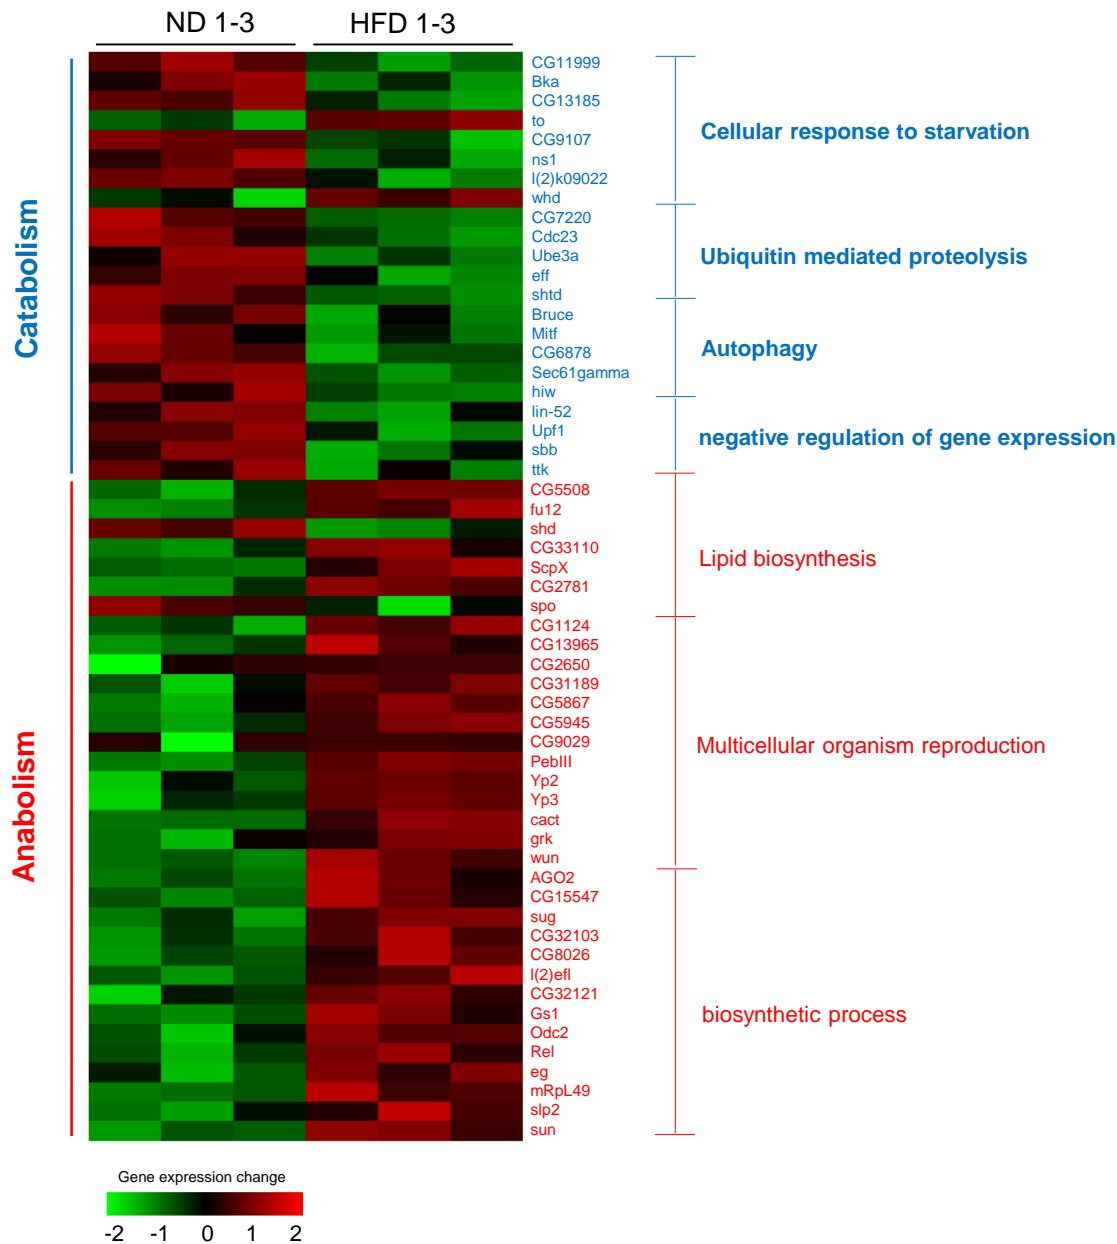

Supplement: supp [file elife-53103-supp-v1.zip › elife_poa_e53103_Figure_5_figure_supplement_3.pdf]

Figure 6 – figure supplement 1

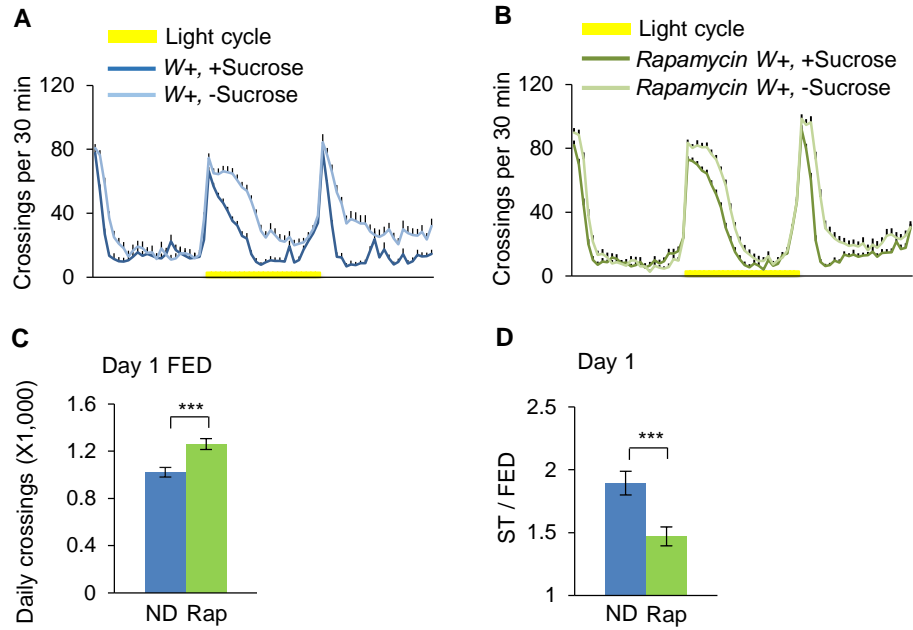

Supplement: supp [file elife-53103-supp-v1.zip › elife_poa_e53103_Figure_6_figure_supplement_1.pdf]

**Figure 6 – figure supplement 2**

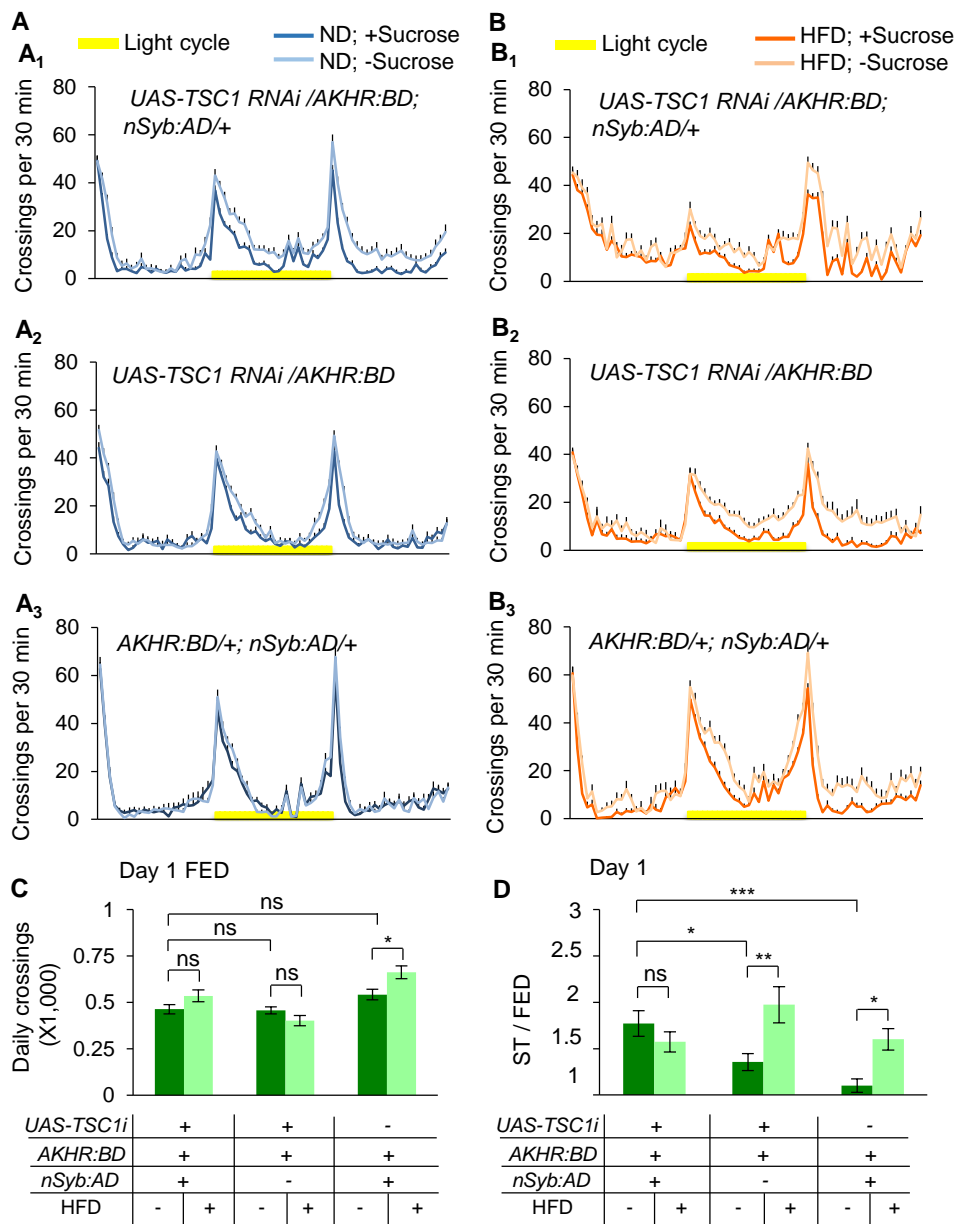

Supplement: supp [file elife-53103-supp-v1.zip › elife_poa_e53103_Figure_6_figure_supplement_2.pdf]

**Figure 6 – figure supplement 3**

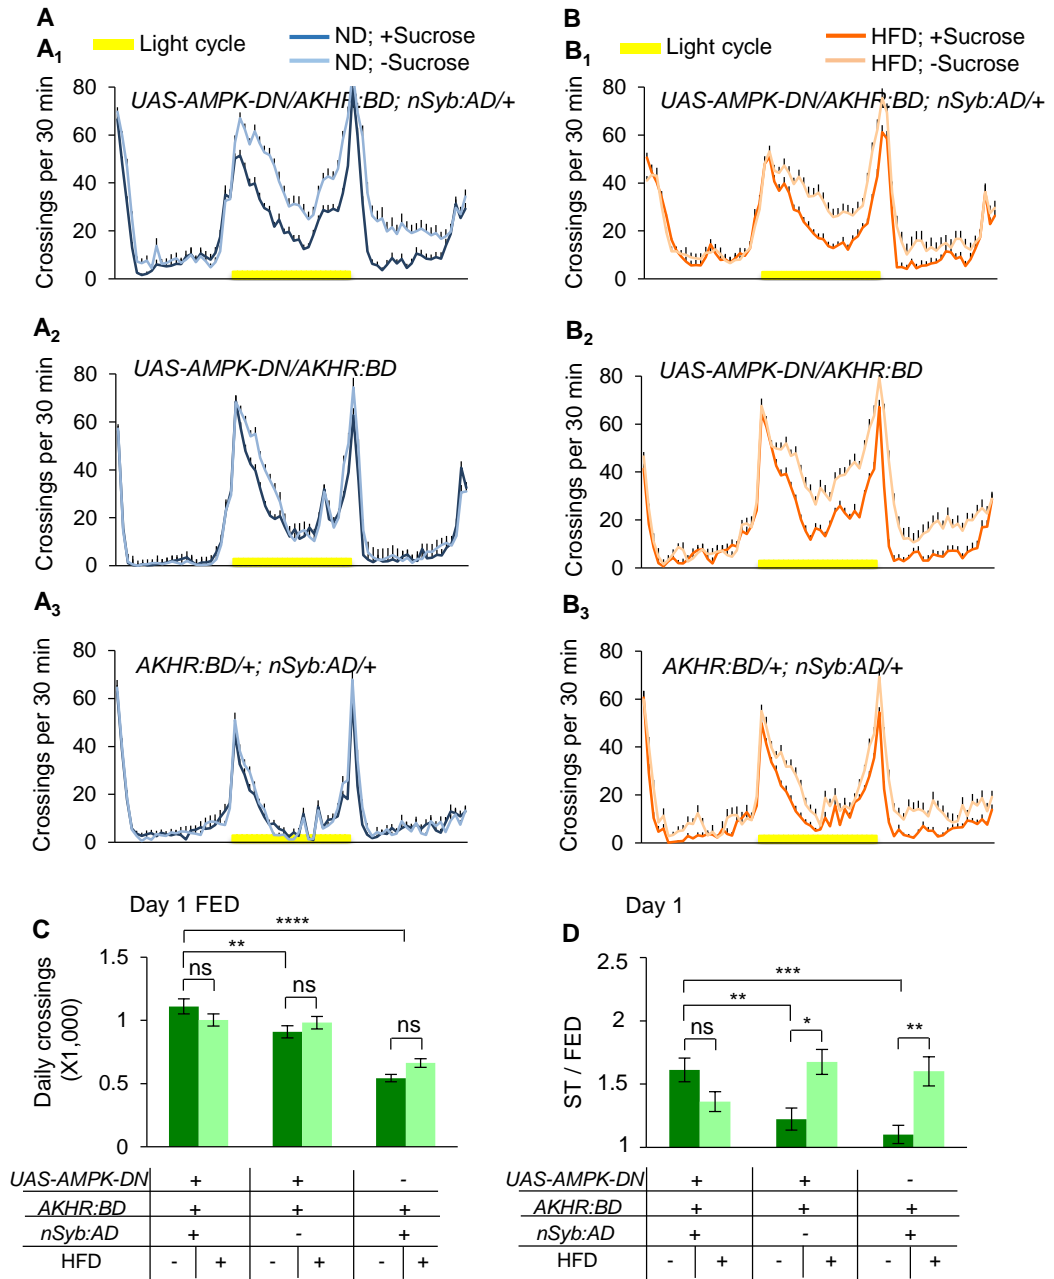

Supplement: supp [file elife-53103-supp-v1.zip › elife_poa_e53103_Figure_6_figure_supplement_3.pdf]
